# Supplementary material for: Cellular and Transcriptional Responses of Resistant and Susceptible Cultivars of Alfalfa to the Root Lesion Nematode, Pratylenchus penetrans
Source: Front Plant Sci. 2019 Jul 31;10:971. doi: 10.3389/fpls.2019.00971 (PMC6685140; doi:10.3389/fpls.2019.00971)
Supplement: Supplementary file 2 [file Table_2.XLSX]

## Sheet: Table S2.1. DEGs
Supporting information Table S2.1. Transcripts differentially expressed in nematode-infected plants of cv. MNGRN-16.
baseMean	log2 Fold Change	pvalue	padj	ID (this study)	Sequence Length	Sequence Description NCBI	Sequence description & ID, Medicago truncatula
22.3318	4.16566	1.7e-08	0.000626069	31200_t	1404	UDP-glucosyltransferase family protein	Medtr6g042310.1_UDP-glucosyltransferase_family_protein_HC_chr6:14587997-14589894_20140818
10.8153	3.48405	2.37e-05	0.0943804	MSTRG.14295.1	760	UDP-glucosyltransferase family protein	Medtr6g042310.1_UDP-glucosyltransferase_family_protein_HC_chr6:14587997-14589894_20140818
63.1495	1.72218	6.66e-07	0.0122563	82337_t	3237	IMP dehydrogenase/GMP reductase, related	Medtr4g033085.1_isoflavone-7-O-methyltransferase_HC_chr4:11468865-11467122_20140818
70.584	1.63914	2.35e-05	0.0943804	34504_t	732	class I glutamine amidotransferase	Medtr2g009720.2_class_I_glutamine_amidotransferase_HC_chr2:2055672-2050938_20140818
152.624	1.37924	2.49e-07	0.00610622	8355_t	843	xyloglucan endotransglucosylase/hydrolase family protein	Medtr4g057450.1_xyloglucan_endotransglucosylase/hydrolase_family_protein_HC_chr4:21085982-21083030_20140818
86.5651	1.31902	7.59e-06	0.0504821	MSTRG.20521.2	672	receptor-like protein 51	Medtr8g086590.1_LRR_receptor-like_kinase_family_protein_HC_chr8:35922748-35920974_20140818
3228.95	1.311	1.68e-05	0.0774356	90523_t	801	---NA---	Medtr2g040180.1_Serine/Threonine_kinase_domain_protein_putative_LC_chr2:17624401-17626939_20140818
94.0561	1.25936	5.42e-06	0.0443724	MSTRG.51124.5	623	receptor-like protein 51	Medtr8g086590.1_LRR_receptor-like_kinase_family_protein_HC_chr8:35922748-35920974_20140818
1461.12	1.25787	1.48e-07	0.00434763	186772_t	2538	beta-xylosidase/alpha-L-arabinofuranosidase 1	Medtr2g008240.1_beta-xylosidase/alpha-L-arabinofuranosidase-like_protein_HC_chr2:1371918-1367059_20140818
1699.86	1.2091	4.09e-07	0.00859652	96942_t	399	Lipid transfer protein	Medtr4g108150.1_Lipid_transfer_protein_HC_chr4:44830064-44829264_20140818
411.398	1.16984	2.61e-05	0.0985717	MSTRG.58748.6	1677	RNA-binding KH domain protein	Medtr2g005590.1_RNA-binding_KH_domain_protein_HC_chr2:223787-220586_20140818
181.718	1.14489	3.17e-06	0.0311433	MSTRG.62903.1	514	putative methyltransferase PMT15-like protein	Medtr7g076170.1_methyltransferase_HC_chr7:28642120-28636952_20140818
4741.33	1.10835	1.08e-05	0.0638971	MSTRG.16676.2	346	14 kDa proline-rich protein DC2.15-like	Medtr4g101280.1_Lipid_transfer_protein_HC_chr4:41833903-41833046_20140818
284.177	1.08684	1.45e-05	0.0711436	12877_t	1095	xyloglucan endotransglucosylase/hydrolase family protein	Medtr7g084750.1_xyloglucan_endotransglucosylase/hydrolase_family_protein_HC_chr7:32708057-32710264_20140818
929.858	1.04083	9.32e-07	0.0152415	2502_t	2097	PIF1-like helicase	Medtr5g061500.1_PIF1-like_helicase_LC_chr5:25541950-25543545_20140818
831.842	1.01682	1.27e-05	0.0693965	MSTRG.61262.1	2037	tubulin beta-1 chain	Medtr8g098360.1_tubulin_beta-1_chain_HC_chr8:40920094-40915697_20140818
137.171	-1.32031	1.37e-06	0.0173418	MSTRG.15145.1	1722	tubulin beta chain-like	Medtr8g107250.1_tubulin_HC_chr8:45318751-45321187_20140818
206.875	-1.49555	1.34e-05	0.0702662	127288_t	1581	organic cation/carnitine transporter	Medtr8g447340.1_organic_cation/carnitine_transporter_HC_chr8:18601016-18599285_20140818
121.553	-1.7569	2.55e-05	0.0985717	MSTRG.60801.9	1778	inactive purple acid phosphatase-like protein	Medtr8g023770.1_inactive_purple_acid_phosphatase-like_protein_HC_chr8:8640566-8642741_20140818
43.1934	-1.96088	9.36e-06	0.0574508	64352_t	2520	receptor-like protein	Medtr6g039180.1_receptor-like_protein_LC_chr6:14113204-14108786_20140818
14.5852	-2.5324	2.15e-05	0.0929771	MSTRG.35489.1	388	serine/threonine-protein phosphatase 7 long form homolog	---NA---
17.4994	-3.95707	1.25e-06	0.0173418	MSTRG.1200.2	977	Retrovirus-related Pol polyprotein from transposon 17.6	Medtr6g045307.1_IPP_transferase_LC_chr6:16235075-16228160_20140818
364.885	-8.51565	1.95e-06	0.0221406	190268_t	2035	hypothetical protein CDL15_Pgr020624	Medtr0052s0130.1_senescence-associated_protein_HC_scaffold0052:58473-60984_20140818

## Sheet: Table S2.2. Unique
Supporting information Table S2.2. Unique genes expressed only in nematode-infected plants of cv. MNGRN-16.
baseMean	log2 Fold Change	pvalue	padj	ID (this study)	Sequence Length	Sequence Description NCBI	Sequence description & ID, Medicago truncatula
Unique up-regulated genes expressed in nematode-infected cv. MNGRN-16
16.0337	6.33848	7.89e-06	0.0504821	9476_t	1623	polygalacturonase At1g48100	Medtr6g005630.1_polygalacturonase_HC_chr6:863153-867302_20140818
35.9829	4.12468	1.18e-05	0.0670618	112249_t	3090	NBS-LRR type disease resistance protein	Medtr6g046570.1_disease_resistance_protein_(CC-NBS-LRR_class)_family_protein_LC_chr6:16844869-16841087_20140818
Unique down-regulated genes expressed in nematode-infected cv. MNGRN-16
23.2658	-3.39005	2.25e-05	0.0943804	MSTRG.37695.2	932	F-box protein interaction domain protein	Medtr6g086825.1_F-box_protein_interaction_domain_protein_LC_chr6:32746141-32744338_20140818
64.6137	-4.17359	6.58e-06	0.0482271	52807_t	1545	PREDICTED: uncharacterized protein LOC109342030 isoform X2	Medtr4g026570.1_hypothetical_protein_LC_chr4:9142766-9142245_20140818
32.7147	-4.3491	6.88e-06	0.0482271	57619_t	462	probable WRKY transcription factor 75	Medtr8g096730.1_WRKY_family_transcription_factor_HC_chr8:40590910-40591934_20140818
20.4057	-4.92311	2.07e-05	0.092316	19600_t	3984	ribonuclease H	Medtr7g111367.1_reverse_transcriptase_putative_LC_chr7:45714609-45713248_20140818
10.1171	-5.23177	5.35e-06	0.0443724	93156_t	3231	hypothetical protein MTR_0015s0160	Medtr0015s0160.1_hypothetical_protein_LC_scaffold0015:162274-163944_20140818
11.3392	-6.33484	2.21e-06	0.0232514	MSTRG.52223.1	655	SSXT protein (amino-terminal region) protein	Medtr3g092260.1_SSXT_protein_(amino-terminal_region)_protein_HC_chr3:42152282-42149249_20140818
12.2227	-6.36563	1.56e-05	0.0740313	63261_t	4104	NBS-LRR type disease resistance protein	Medtr3g086070.1_disease_resistance_protein_RGA4_LC_chr3:38938490-38942202_20140818
53.7149	-7.21206	3.82e-06	0.0351336	MSTRG.6359.6	582	---NA---	---NA---
