# Supplementary material for: Cellular and Transcriptional Responses of Resistant and Susceptible Cultivars of Alfalfa to the Root Lesion Nematode, Pratylenchus penetrans
Source: Front Plant Sci. 2019 Jul 31;10:971. doi: 10.3389/fpls.2019.00971 (PMC6685140; doi:10.3389/fpls.2019.00971)
Supplement: Supplementary file 3 [file Table_3.XLSX]

## Sheet: Table S3.1. DETs
Supporting information Table S3.1. Transcripts differentially expressed in nematode-infected plants of cv. Baker.
baseMean	log2 Fold Change	pvalue	padj	ID (this study)	Sequence Length	Sequence Description NCBI	Sequence description & ID, Medicago truncatula
316.598	5.13174	7.65e-17	2.25e-12	MSTRG.56814.1	206	ubiquitin extension protein 5 partial	Medtr8g088060.1_ubiquitin-40S_ribosomal_S27a-like_protein_HC_chr8:36459811-36460782_20140818
551.102	5.11958	3.48e-13	5.12e-09	76635_t	876	hypothetical protein MTR_0055s0130	Medtr0055s0130.1_hypothetical_protein_HC_scaffold0055:73353-68450_20140818
22.4276	4.77479	3.45e-09	1.27e-05	103728_t	507	transmembrane protein putative	Medtr3g491900.1_transmembrane_protein_putative_HC_chr3:41852311-41853159_20140818
29.9886	4.74401	2.57e-09	1e-05	27408_t	438	unknown	Medtr5g011850.1_EF_hand_calcium-binding_family_protein_HC_chr5:3472901-3473995_20140818
741.883	4.60599	5.74e-12	4.97e-08	MSTRG.48791.1	419	senescence-associated protein putative	Medtr0055s0050.1_senescence-associated_protein_putative_HC_scaffold0055:18043-14674_20140818
18.6177	4.48345	7.26e-07	0.00133605	120316_t	1353	hypothetical protein MTR_0055s0130	Medtr0055s0130.1_hypothetical_protein_HC_scaffold0055:73353-68450_20140818
12.7409	4.33317	5.35e-05	0.0371997	MSTRG.66872.1	325	---NA---	---NA---
1281.22	4.25056	3.4e-14	6.26e-10	74973_t	1261	hypothetical protein TanjilG_08066 partial	Medtr0052s0140.1_hypothetical_protein_HC_scaffold0052:65682-64147_20140818
29.1951	4.23022	1.43e-08	4.58e-05	187625_t	342	hypothetical protein MTR_1g038885	Medtr1g038885.1_hypothetical_protein_LC_chr1:14476601-14476951_20140818
34.149	4.16708	2.13e-07	0.000514932	MSTRG.8022.1	241	unknown	Medtr4g081130.1_thiazole_biosynthetic_enzyme_HC_chr4:31409158-31406252_20140818
57.8494	4.09645	2.68e-12	3.04e-08	111998_t	885	PREDICTED: LOW QUALITY PROTEIN: uncharacterized protein	Medtr4g006040.1_ycf68_protein_HC_chr4:489841-491171_20140818
18.0962	4.07132	4.48e-06	0.00599029	MSTRG.87369.1	690	albumin I	Medtr3g067280.1_albumin_I_HC_chr3:29927479-29926556_20140818
58.6726	4.05955	4.95e-12	4.64e-08	49011_t	2163	hypothetical protein DCAR_001521	Medtr4g006070.1_hypothetical_protein_HC_chr4:495841-493796_20140818
58.1863	4.05688	6.88e-12	5.63e-08	87286_t	1644	PREDICTED: LOW QUALITY PROTEIN: uncharacterized protein LOC107907897	Medtr4g006040.1_ycf68_protein_HC_chr4:489841-491171_20140818
57.1852	3.95579	3.04e-11	1.87e-07	117449_t	396	hypothetical protein GLYMA_20G085100	Medtr6g086840.1_hypothetical_protein_LC_chr6:32755844-32757031_20140818
63.9967	3.93493	3.25e-11	1.91e-07	81007_t	3938	hypothetical protein MTR_3g047490	Medtr3g047490.1_hypothetical_protein_LC_chr3:15837441-15836470_20140818
9.91897	3.92511	3.97e-05	0.031436	155515_t	1851	phosphatidylinositol 3- and 4-kinase	Medtr4g068580.1_phosphatidylinositol_3-_and_4-kinase_HC_chr4:25659472-25677115_20140818
268.226	3.91709	2.38e-09	1e-05	MSTRG.48791.3	458	PREDICTED: uncharacterized protein LOC107405433	Medtr0055s0050.1_senescence-associated_protein_putative_HC_scaffold0055:18043-14674_20140818
23.1265	3.84626	8.13e-06	0.00997956	142811_t	336	unknown	Medtr5g064580.1_general_regulatory_factor_2_HC_chr5:27124640-27127449_20140818
34.6863	3.81183	3.05e-08	8.99e-05	MSTRG.45271.1	217	unknown	Medtr4g095050.1_cytochrome_P450_family_protein_HC_chr4:39587364-39583537_20140818
86.2422	3.78866	5.04e-12	4.64e-08	MSTRG.21477.7	204	hypothetical protein	Medtr5g032670.1_hypothetical_protein_HC_chr5:14074645-14075917_20140818
20.67	3.78332	5.04e-06	0.00669067	105509_t	1626	pollen Ole e I family allergen	Medtr3g071470.1_pollen_Ole_e_I_family_allergen_HC_chr3:32064085-32063196_20140818
25.1616	3.78011	2.91e-05	0.0250957	53396_t	4668	Integrase catalytic region; Zinc finger CCHC-type; Peptidase aspartic catalytic	Medtr6g053150.1_hypothetical_protein_LC_chr6:19070950-19071765_20140818
23.6036	3.75928	1.11e-05	0.0126834	62423_t	336	unknown	Medtr5g064580.1_general_regulatory_factor_2_HC_chr5:27124640-27127449_20140818
1628.24	3.72625	7.11e-10	3.27e-06	MSTRG.48791.2	316	PREDICTED: LOW QUALITY PROTEIN: uncharacterized protein LOC105117228	Medtr0052s0090.1_senescence-associated_protein_putative_HC_scaffold0052:43283-43667_20140818
57.7774	3.71736	6.47e-09	2.22e-05	MSTRG.62350.1	207	hypothetical protein PHYPA_019591	Medtr3g105890.2_transmembrane_protein_putative_HC_chr3:48836748-48839897_20140818
23.0785	3.69676	2.49e-09	1e-05	MSTRG.55991.2	240	senescence-associated protein	Medtr0055s0120.1_senescence-associated_protein_HC_scaffold0055:62498-67419_20140818
61.3826	3.62166	3.39e-10	1.78e-06	187966_t	923	PREDICTED: LOW QUALITY PROTEIN: uncharacterized protein LOC107907897	Medtr4g006040.1_ycf68_protein_HC_chr4:489841-491171_20140818
905.449	3.40438	6.98e-11	3.81e-07	74524_t	843	senescence-associated protein	Medtr0052s0070.1_senescence-associated_protein_HC_scaffold0052:21398-28183_20140818
6301.03	3.3954	1.64e-11	1.21e-07	MSTRG.57138.1	421	PREDICTED: protein TAR1-like	Medtr0055s0030.1_hypothetical_protein_HC_scaffold0055:6527-3946_20140818
11.0137	3.33455	3.48e-05	0.0282791	138795_t	666	DUF506 family protein	Medtr1g041155.1_DUF506_family_protein_HC_chr1:15289220-15287020_20140818
122.223	3.31991	3.78e-12	3.98e-08	190011_t	897	hypothetical protein L195_g023890 partial	hypothetical protein L195_g023890 partial [Trifolium pratense]
3133.31	3.31747	2.29e-11	1.47e-07	MSTRG.48793.2	1116	hypothetical protein MTR_0052s0140	Medtr0052s0140.1_hypothetical_protein_HC_scaffold0052:65682-64147_20140818
785.855	3.30869	1.72e-09	7.45e-06	106000_t	744	DnaJ heat shock amino-terminal domain protein	Medtr1g112910.2_DnaJ_heat_shock_amino-terminal_domain_protein_HC_chr1:51197052-51199906_20140818
12.5344	3.26998	2.61e-06	0.00404127	MSTRG.64511.2	241	receptor-like Serine/Threonine-kinase ALE2-like protein putative	Medtr4g126270.1_receptor-like_Serine/Threonine-kinase_ALE2-like_protein_putative_HC_chr4:52511256-52521195_20140818
42.2583	3.26676	1.78e-05	0.0181025	MSTRG.20363.1	233	uncharacterized protein A4U43_C02F18770	Medtr2g067620.1_cytoplasmic-like_aconitate_hydratase_HC_chr2:28312952-28303191_20140818
28.3556	3.2617	2.84e-05	0.0246408	159678_t	342	hypothetical protein L195_g058837 partial	Medtr6g024185.1_plant_invertase/pectin_methylesterase_inhibitor_LC_chr6:8638097-8639435_20140818
11.6745	3.21224	1.92e-05	0.0191174	64657_t	318	cysteine proteinase superfamily protein	Medtr3g081150.1_cysteine_proteinase_superfamily_protein_HC_chr3:36756211-36761219_20140818
38.1494	3.19735	1.66e-05	0.0172224	MSTRG.36468.2	722	hypothetical protein MTR_3g082340	Medtr3g082340.1_hypothetical_protein_HC_chr3:37159184-37161016_20140818
59.0978	3.15751	4.06e-06	0.00564231	MSTRG.79422.3	937	Pyrophosphate--fructose 6-phosphate 1-phosphotransferase subunit alpha	Medtr1g035230.1_pyrophosphate-fructose-6-phosphate_1-phosphotransferase_HC_chr1:12597535-12592403_20140818
76.3142	3.09456	4.48e-07	0.000942407	MSTRG.79422.1	1537	hypothetical protein GOBAR_AA26372	Medtr1g035230.1_pyrophosphate-fructose-6-phosphate_1-phosphotransferase_HC_chr1:12597535-12592403_20140818
22.8424	3.07344	3.69e-06	0.00521835	52473_t	1748	---NA---	---NA---
13.5788	3.03198	8.25e-05	0.0487969	2119_t	474	transducin/WD40 repeat protein	Medtr8g089650.1_transducin/WD40_repeat_protein_HC_chr8:37302350-37304422_20140818
16.0893	3.00265	2.46e-05	0.0220421	145697_t	507	carbamoyl-phosphate synthase small chain-like protein	Medtr3g095490.2_carbamoylphosphate_synthase_small_subunit_HC_chr3:43632852-43636299_20140818
57.3874	2.97296	2.51e-07	0.000586357	122827_t	1224	hypothetical protein GOBAR_AA33653	Medtr4g006040.1_ycf68_protein_HC_chr4:489841-491171_20140818
397.886	2.92007	2.56e-07	0.000588084	35944_t	1698	BnaAnng22160D partial	Medtr0052s0100.1_senescence-associated_protein_HC_scaffold0052:43794-47521_20140818
43.3245	2.90825	3.01e-07	0.000676098	129769_t	813	hypothetical protein TanjilG_00025	Medtr8g040260.1_hypothetical_protein_HC_chr8:15005757-15006760_20140818
234.513	2.908	2.92e-06	0.00439316	120238_t	681	hypothetical protein MTR_5g081480	Medtr5g081480.1_hypothetical_protein_LC_chr5:34898739-34895435_20140818
394.682	2.89009	3.03e-07	0.000676098	82201_t	1592	BnaAnng22160D partial	Medtr0052s0100.1_senescence-associated_protein_HC_scaffold0052:43794-47521_20140818
24.9736	2.88183	6.25e-07	0.00121829	MSTRG.7233.1	272	pectin methylesterase	Medtr7g050980.1_pectinesterase/pectinesterase_inhibitor_HC_chr7:17820159-17822765_20140818
4929.9	2.87594	1.59e-08	4.97e-05	108322_t	3729	hypothetical protein TanjilG_08066 partial	Medtr0052s0140.1_hypothetical_protein_HC_scaffold0052:65682-64147_20140818
37.4664	2.87335	3.26e-06	0.00477978	118304_t	1284	hypothetical protein MTR_0186s0120	Medtr0186s0120.1_hypothetical_protein_HC_scaffold0186:29633-29262_20140818
1726.37	2.78437	1.49e-07	0.00040126	MSTRG.48795.1	210	hypothetical protein VIGAN_UM134600	Medtr0055s0080.1_transmembrane_protein_putative_HC_scaffold0055:30838-31389_20140818
139.017	2.77763	6.08e-14	9.94e-10	MSTRG.64717.1	257	S-adenosyl-L-homocysteine hydrolase	Medtr8g083090.1_S-adenosyl-L-homocysteine_hydrolase_HC_chr8:35157532-35154996_20140818
108.329	2.66685	5.05e-07	0.00103176	59349_t	369	AF189766_1type 1 metallothionein	Medtr4g021725.1_metallothionein_HC_chr4:7155063-7153291_20140818
52.5108	2.51328	5.24e-06	0.00688397	64684_t	1005	choline-phosphate cytidylyltransferase	Medtr3g081530.1_choline-phosphate_cytidylyltransferase_HC_chr3:36916465-36912358_20140818
1871.78	2.50672	6.04e-10	2.87e-06	147752_t	2673	hypothetical protein TanjilG_03599	Medtr0052s0070.1_senescence-associated_protein_HC_scaffold0052:21398-28183_20140818
41.3276	2.45388	2.12e-05	0.0200952	MSTRG.7921.5	308	hypothetical protein MTR_1g084990	Medtr1g084990.1_hypothetical_protein_LC_chr1:37943685-37937964_20140818
706.688	2.44951	2.14e-05	0.0202153	MSTRG.48793.1	680	hypothetical protein MTR_0052s0140	Medtr0052s0140.1_hypothetical_protein_HC_scaffold0052:65682-64147_20140818
51.236	2.40321	1.5e-07	0.00040126	14709_t	315	hypothetical protein MTR_3g026785	Medtr3g026785.1_hypothetical_protein_HC_chr3:8251194-8250863_20140818
40.6497	2.38898	5e-05	0.0359229	MSTRG.82890.3	210	GTP-binding protein TypA/BipA	Medtr4g079360.1_GTP-binding_protein_TypA/BipA_HC_chr4:30669016-30656018_20140818
72.4986	2.38415	1.55e-05	0.0163414	MSTRG.17913.1	260	---NA---	---NA---
40.8488	2.38084	8.02e-05	0.0478278	166638_t	414	unknown	Medtr8g031190.1_syntaxin_of_plants_protein_HC_chr8:11668474-11663639_20140818
41.3238	2.34618	7.92e-05	0.0475831	122232_t	342	unknown	Medtr8g031190.1_syntaxin_of_plants_protein_HC_chr8:11668474-11663639_20140818
168.305	2.33652	5.37e-11	3.04e-07	MSTRG.64717.2	262	PREDICTED: adenosylhomocysteinase 1-like partial	Medtr8g083090.1_S-adenosyl-L-homocysteine_hydrolase_HC_chr8:35157532-35154996_20140818
61.9738	2.33082	1.09e-06	0.0018929	163455_t	576	multiprotein bridging factor 1b-like protein	Medtr4g080090.1_multiprotein_bridging_factor_1b-like_protein_HC_chr4:31042066-31045251_20140818
2263.58	2.30828	3.15e-05	0.026346	MSTRG.23163.1	216	---NA---	---NA---
25.9993	2.2993	4.13e-07	0.000881717	MSTRG.13830.1	221	hydroxyproline-rich glycoprotein-like protein	Medtr8g104260.1_hydroxyproline-rich_glycoprotein-like_protein_HC_chr8:43905814-43900142_20140818
17.3703	2.26745	8.01e-05	0.0478278	121473_t	600	peptidyl-prolyl cis-trans isomerase CYP28 chloroplastic	Medtr2g461260.1_peptidyl-prolyl_cis-trans_isomerase_HC_chr2:25293702-25297002_20140818
54.4393	2.25876	5.92e-07	0.00117716	182222_t	843	hypothetical protein MTR_1g109310	Medtr1g109310.1_hypothetical_protein_HC_chr1:49430047-49428295_20140818
811.718	2.2505	1.73e-07	0.000445151	MSTRG.49177.1	272	hypothetical protein CQW23_33210	Medtr0052s0070.1_senescence-associated_protein_HC_scaffold0052:21398-28183_20140818
1433.52	2.24908	2.01e-16	4.94e-12	MSTRG.21477.5	276	hypothetical protein	Medtr5g032670.1_hypothetical_protein_HC_chr5:14074645-14075917_20140818
39.0867	2.21747	9.93e-06	0.0115166	MSTRG.85564.1	221	LRR receptor-like kinase family protein	Medtr2g098250.1_LRR_receptor-like_kinase_family_protein_HC_chr2:41999106-41997376_20140818
14.9652	2.19052	3.07e-05	0.0258023	MSTRG.6466.1	243	hypothetical protein TSUD_205490 partial	Medtr5g084060.2_protein_transporter_Sec61_subunit_gamma-like_protein_HC_chr5:36280934-36278662_20140818
23.4343	2.16523	5.05e-05	0.0360157	MSTRG.85461.1	228	Serine/Threonine kinase	Medtr1g046620.1_ABC1/COQ8_Serine/Threonine_kinase_HC_chr1:17578540-17568987_20140818
182.79	2.11483	2.2e-05	0.0202609	176535_t	414	albumin I	Medtr3g067430.1_albumin_I_LC_chr3:30050282-30049149_20140818
24.7076	2.05557	8.44e-05	0.0493398	MSTRG.67177.7	1199	---NA---	---NA---
818.923	2.03375	6.81e-05	0.043466	83957_t	951	hypothetical protein MTR_0052s0140	Medtr0052s0140.1_hypothetical_protein_HC_scaffold0052:65682-64147_20140818
95.3912	2.03092	2.73e-05	0.0242577	MSTRG.55084.1	822	PAIR1 putative	Medtr8g030730.1_PAIR1_putative_HC_chr8:11395428-11399892_20140818
1109.2	1.99181	2.03e-15	4.26e-11	MSTRG.57218.2	270	LOW QUALITY PROTEIN: probable aquaporin TIP-type	Medtr7g103030.1_tonoplast_intrinsic_protein_HC_chr7:41419534-41417358_20140818
30.8212	1.9815	8.8e-06	0.0104805	132062_t	621	unknown	unknown [Medicago truncatula]
2895.49	1.98019	3.28e-06	0.00477978	MSTRG.68580.1	344	hypothetical protein GOBAR_DD27809	Medtr0055s0030.1_hypothetical_protein_HC_scaffold0055:6527-3946_20140818
44.9095	1.96943	1.16e-05	0.0130765	MSTRG.68929.2	294	ubiquitin family protein	Medtr1g012210.1_ubiquitin_family_protein_LC_chr1:2382883-2382131_20140818
104.499	1.94784	6.49e-05	0.0424545	MSTRG.87368.1	261	unknown	Medtr3g067445.1_albumin_I_HC_chr3:30069372-30068851_20140818
42.7988	1.94712	5.87e-06	0.00731882	MSTRG.80210.1	397	outer envelope membrane protein	Medtr7g094710.1_transmembrane_protein_putative_HC_chr7:37788673-37789393_20140818
81.9653	1.93387	4.9e-05	0.0355257	MSTRG.55084.2	690	PAIR1 putative	Medtr8g030730.1_PAIR1_putative_HC_chr8:11395428-11399892_20140818
91.4889	1.87704	3.62e-07	0.000784178	MSTRG.42591.1	287	hypothetical protein TSUD_72420	Medtr4g120825.1_plant_invertase/pectin_methylesterase_inhibitor_HC_chr4:50037482-50036249_20140818
355.627	1.86476	1.84e-11	1.23e-07	MSTRG.21477.3	381	hypothetical protein	Medtr5g032670.1_hypothetical_protein_HC_chr5:14074645-14075917_20140818
110.052	1.83851	4.65e-10	2.36e-06	41192_t	345	---NA---	---NA---
220.954	1.81958	8.06e-08	0.000228159	100791_t	399	hypothetical protein PHAVU_010G065400g	Medtr4g014460.1_abscisic_acid_receptor_HC_chr4:4083299-4081745_20140818
1394.29	1.79256	1.82e-11	1.23e-07	MSTRG.57218.1	299	LOW QUALITY PROTEIN: probable aquaporin TIP-type	Medtr7g103030.1_tonoplast_intrinsic_protein_HC_chr7:41419534-41417358_20140818
4771.38	1.78655	6.75e-05	0.0433999	MSTRG.4053.1	236	hypothetical protein MELLADRAFT_90079	Medtr0052s0170.1_hypothetical_protein_HC_scaffold0052:77541-80589_20140818
2137.62	1.78585	4.96e-18	1.83e-13	MSTRG.21477.2	390	hypothetical protein	Medtr5g032670.1_hypothetical_protein_HC_chr5:14074645-14075917_20140818
4805.11	1.75073	2e-05	0.019473	MSTRG.73636.1	592	hypothetical protein GOBAR_AA12888	Medtr0052s0110.1_rRNA_intron-encoded_homing_endonuclease_putative_HC_scaffold0052:50226-47921_20140818
107.14	1.7449	5.66e-06	0.00718993	MSTRG.78655.2	268	---NA---	---NA---
8606.79	1.71378	1.59e-05	0.016621	MSTRG.26383.1	335	hypothetical protein MELLADRAFT_90079	Medtr0055s0130.1_hypothetical_protein_HC_scaffold0055:73353-68450_20140818
91.6673	1.69368	7.89e-07	0.00141638	MSTRG.56890.1	1184	---NA---	---NA---
72.6692	1.68138	2.17e-05	0.0202609	MSTRG.22349.1	812	leguminosin group485 secreted peptide	Medtr5g077290.1_leguminosin_group485_secreted_peptide_HC_chr5:33000236-32998991_20140818
70.9166	1.63186	1.7e-07	0.000445151	MSTRG.74748.1	224	unknown	Medtr3g087510.1_PLAT-plant-stress_protein_HC_chr3:39668097-39666854_20140818
38.6966	1.61957	4.16e-05	0.0317175	MSTRG.70478.22	962	PREDICTED: uncharacterized protein LOC101498857 isoform X1	Medtr3g095240.1_DNA-binding_protein_alba_protein_HC_chr3:43522165-43525256_20140818
50.7348	1.60761	7.37e-06	0.00911883	43745_t	1767	metal-dependent phosphohydrolase	Medtr4g129850.1_metal-dependent_phosphohydrolase_HC_chr4:54124538-54130347_20140818
101.886	1.5936	5.54e-05	0.0376401	MSTRG.18504.7	634	unknown	Medtr3g080080.1_nucleotide_exchange_factor_SIL1_HC_chr3:36220203-36216221_20140818
156.646	1.58533	6.42e-05	0.0421796	MSTRG.50222.1	255	heme peroxidase plant/fungal/bacterial	Medtr4g132110.2_cationic_peroxidase_HC_chr4:55186829-55184196_20140818
109.234	1.5665	5.42e-06	0.00699686	MSTRG.75978.1	320	hypothetical protein MTR_3g026785	Medtr3g026785.1_hypothetical_protein_HC_chr3:8251194-8250863_20140818
48.931	1.54077	5.42e-05	0.0372764	125305_t	1383	hypothetical protein MTR_0052s0140	Medtr0052s0140.1_hypothetical_protein_HC_scaffold0052:65682-64147_20140818
783.838	1.50642	1.06e-09	4.73e-06	106337_t	549	polyubiquitin	Medtr7g116360.2_polyubiquitin_3_HC_chr7:47989622-47990311_20140818
145.634	1.47389	8.83e-06	0.0104805	9513_t	354	transmembrane protein putative	Medtr3g064040.1_transmembrane_protein_putative_HC_chr3:28794619-28795716_20140818
140.526	1.46514	3.08e-06	0.00457825	28199_t	3453	lysine-tRNA ligase-like protein	Medtr4g127770.1_lysine-tRNA_ligase-like_protein_LC_chr4:53118581-53107577_20140818
91.0977	1.45106	2.23e-05	0.0203693	MSTRG.35702.3	664	carbohydrate-binding X8 domain protein	Medtr5g044530.1_carbohydrate-binding_X8_domain_protein_HC_chr5:19551318-19554463_20140818
2849.36	1.40889	1.26e-11	9.75e-08	MSTRG.21477.6	243	hypothetical protein	Medtr5g032670.1_hypothetical_protein_HC_chr5:14074645-14075917_20140818
1520.32	1.4017	2.26e-06	0.00353318	128500_t	306	unknown	Medtr8g070770.1_Defensin_MtDef4.2_HC_chr8:29809141-29808336_20140818
481.787	1.37594	8.48e-05	0.0493398	138076_t	2046	thiamine biosynthesis protein ThiC	Medtr3g462950.1_thiamine_biosynthesis_protein_ThiC_HC_chr3:25191816-25197236_20140818
183.848	1.37185	3.79e-06	0.00531393	MSTRG.76884.1	262	fasciclin-like arabinogalactan protein	Medtr2g090765.1_fasciclin-like_arabinogalactan_protein_HC_chr2:38919962-38918307_20140818
1018.89	1.36313	4.16e-05	0.0317175	MSTRG.33351.1	1394	RNA recognition motif	Medtr3g065490.1_RNA_recognition_motif_HC_chr3:29610838-29605718_20140818
653.884	1.3631	2.25e-07	0.000533182	MSTRG.54044.2	362	Lipid transfer protein	Medtr7g065160.1_Lipid_transfer_protein_HC_chr7:23755721-23754468_20140818
88.4957	1.35935	6.64e-07	0.00125385	93593_t	465	protease inhibitor/seed storage/LTP family protein	Medtr4g101310.1_protease_inhibitor/seed_storage/LTP_family_protein_HC_chr4:41841657-41842329_20140818
113.056	1.35441	6.31e-07	0.00121829	MSTRG.63969.10	840	hypothetical protein MTR_1g107495	Medtr1g107495.1_hypothetical_protein_HC_chr1:48803181-48800247_20140818
158.354	1.34005	7.59e-05	0.046157	62606_t	1170	60S ribosomal protein L3B	Medtr1g098540.1_60S_ribosomal_protein_L3B_HC_chr1:44369848-44366402_20140818
161.383	1.33829	1.28e-05	0.0138276	MSTRG.18819.1	1473	4-coumarate:CoA ligase-like protein	Medtr3g088880.1_4-coumarate:CoA_ligase-like_protein_HC_chr3:34017569-34024666_20140818
269.989	1.33607	6.85e-05	0.043466	39682_t	8310	retrotransposon-related protein partial	Medtr6g045307.1_IPP_transferase_LC_chr6:16235075-16228160_20140818
169.348	1.33437	2.7e-05	0.024125	55343_t	3504	lysine-tRNA ligase-like protein	Medtr4g127770.1_lysine-tRNA_ligase-like_protein_LC_chr4:53118581-53107577_20140818
172.697	1.3282	8.92e-06	0.0105072	106555_t	717	RNA-binding (RRM/RBD/RNP motif) family protein	Medtr5g008890.1_RNA-binding_(RRM/RBD/RNP_motif)_family_protein_HC_chr5:1976757-1981316_20140818
49.4745	1.28887	3.23e-05	0.0268856	MSTRG.62697.1	800	E3 ubiquitin-protein ligase PRT1-like protein putative	Medtr4g022320.1_E3_ubiquitin-protein_ligase_PRT1-like_protein_putative_HC_chr4:7389370-7382599_20140818
101.608	1.22847	1.9e-05	0.0190675	MSTRG.85366.1	279	hypothetical protein MTR_5g089380	Medtr5g089380.1_hypothetical_protein_LC_chr5:38848771-38849072_20140818
99.384	1.208	3.27e-05	0.0268965	MSTRG.9441.5	797	divalent cation tolerance protein CutA1 family protein	Medtr3g100630.2_divalent_cation_tolerance_protein_CutA1_family_protein_HC_chr3:46290852-46287274_20140818
363.215	1.20775	5.09e-05	0.0360157	77460_t	318	succinate dehydrogenase [ubiquinone] iron-sulfur subunit	Medtr1g492610.1_succinate_dehydrogenase_[ubiquinone]_iron-sulfur_subunit_HC_chr1:41503746-41508477_20140818
5653.39	1.18236	4.9e-10	2.4e-06	MSTRG.21477.4	413	hypothetical protein	Medtr5g032670.1_hypothetical_protein_HC_chr5:14074645-14075917_20140818
55.2955	1.17248	2.81e-05	0.0245232	MSTRG.51235.1	220	---NA---	---NA---
259.612	1.15971	1.96e-06	0.00313938	MSTRG.72908.1	530	UDP-glucosyltransferase family protein	Medtr5g019580.2_UDP-glucosyltransferase_family_protein_HC_chr5:7404213-7406208_20140818
106.401	1.157	8.45e-05	0.0493398	MSTRG.18819.3	993	4-coumarate:CoA ligase-like protein	Medtr3g088870.1_4-coumarate:CoA_ligase-like_protein_HC_chr3:34027372-34031978_20140818
267.197	1.14257	5.48e-05	0.0375506	MSTRG.62847.2	372	fasciclin-like arabinogalactan protein	Medtr7g075453.1_fasciclin-like_arabinogalactan_protein_HC_chr7:28251817-28250054_20140818
92.4717	1.13755	3.29e-05	0.0268965	192722_t	495	cwf18 pre-mRNA splicing factor	Medtr1g077570.1_cwf18_pre-mRNA_splicing_factor_HC_chr1:34618361-34621579_20140818
427.893	1.08973	2.19e-05	0.0202609	173574_t	510	ATP synthase 6 kDa subunit	Medtr4g063080.1_ATP_synthase_6_kDa_subunit_HC_chr4:23334667-23336937_20140818
1315.24	1.08576	7.76e-05	0.0470135	MSTRG.26551.4	1289	class Ia chitinase [Galega orientalis]	Medtr3g118390.1_Chitinase_(Class_I)_/_Hevein_HC_chr3:55413457-55415176_20140818
504.139	1.08447	1.61e-06	0.00266304	MSTRG.46197.2	810	---NA---	---NA---
1080.6	1.07558	4.68e-05	0.0346417	MSTRG.39429.2	1787	protein disulfide isomerase (PDI)-like protein	Medtr8g064810.1_protein_disulfide_isomerase_(PDI)-like_protein_HC_chr8:27194182-27196762_20140818
112.761	1.07183	4.28e-05	0.0323214	MSTRG.39409.2	335	myelodysplasia-myeloid leukemia factor 1-interacting protein	Medtr4g102250.1_myelodysplasia-myeloid_leukemia_factor_1-interacting_protein_HC_chr4:42300094-42304057_20140818
1117.71	1.06022	1.15e-06	0.00197114	MSTRG.73634.2	1347	hypothetical protein TanjilG_03599	Medtr0055s0090.1_senescence-associated_protein_HC_scaffold0055:37627-50614_20140818
10545.8	1.0579	1.35e-06	0.00229086	MSTRG.53639.3	235	senescence-associated protein putative	Medtr0152s0090.1_senescence-associated_protein_putative_LC_scaffold0152:27816-25378_20140818
612.936	1.05712	8.6e-06	0.0103772	MSTRG.15323.3	442	hypothetical protein	Medtr4g095280.1_hypothetical_protein_HC_chr4:39695831-39693836_20140818
134.245	1.05694	9.72e-06	0.0113628	MSTRG.67279.6	295	UDP-galactose transporter	Medtr8g090230.2_UDP-galactose_transporter_HC_chr8:37871034-37865340_20140818
1682.57	1.02471	2.32e-05	0.0211115	MSTRG.48352.1	1060	aluminum induced protein with YGL and LRDR motif protein	Medtr2g022520.1_aluminum_induced_protein_with_YGL_and_LRDR_motif_protein_HC_chr2:7790362-7796721_20140818
536.71	1.00846	6.07e-05	0.0404343	187291_t	342	Ribosomal protein S27e	Medtr2g029270.1_40S_ribosomal_protein_S27-1_HC_chr2:10917798-10919668_20140818
1107.15	-1.09181	8.6e-06	0.0103772	MSTRG.26755.7	1956	glycoside hydrolase family 1 protein	Medtr4g015460.1_glycoside_hydrolase_family_1_protein_LC_chr4:4630459-4622289_20140818
85.9237	-1.17106	2.39e-05	0.0215454	MSTRG.3653.1	486	cation transporter ChaC	Medtr3g109250.1_cation_transporter_ChaC_HC_chr3:50503099-50500528_20140818
115.22	-1.27273	4.12e-05	0.0317175	155582_t	2970	P-loop nucleoside triphosphate hydrolase superfamily protein	Medtr3g009560.1_P-loop_nucleoside_triphosphate_hydrolase_superfamily_protein_HC_chr3:2116805-2112788_20140818
54.3377	-1.28389	5.56e-05	0.0376401	111894_t	684	wound-responsive family protein	Medtr5g023110.1_wound-responsive_family_protein_HC_chr5:9180345-9184014_20140818
105.353	-1.38249	4.93e-05	0.0355769	MSTRG.69004.2	2715	P-loop nucleoside triphosphate hydrolase superfamily protein	Medtr3g009560.1_P-loop_nucleoside_triphosphate_hydrolase_superfamily_protein_HC_chr3:2116805-2112788_20140818
81.4819	-1.42309	3.95e-05	0.0314132	111077_t	3507	LRR receptor-like kinase	Medtr7g066590.1_LRR_receptor-like_kinase_HC_chr7:24243931-24241034_20140818
59.5486	-1.59621	4.79e-05	0.0350774	MSTRG.46489.1	1236	---NA---	---NA---
60.4332	-1.65932	7.34e-05	0.0454225	MSTRG.11819.5	1099	sugar porter (SP) family MFS transporter	Medtr4g118610.2_sugar_porter_(SP)_family_MFS_transporter_HC_chr4:49131241-49135079_20140818
67.5445	-1.73541	1.15e-05	0.0129786	135341_t	4431	ABC transporter B family-like protein	Medtr8g022270.1_ABC_transporter_B_family-like_protein_HC_chr8:7869135-7861470_20140818
23.494	-1.84306	2.72e-06	0.00417764	86476_t	897	hypothetical protein MTR_0027s0180	Medtr0027s0180.1_hypothetical_protein_HC_scaffold0027:58501-61787_20140818
54.1608	-1.84947	1.73e-06	0.00283733	MSTRG.89339.4	1910	hypothetical protein L195_g031334	Medtr3g006170.1_retinoblastoma-related_protein_putative_HC_chr3:570880-569693_20140818
17.3655	-2.0171	2.97e-05	0.0252953	193063_t	513	hypothetical protein MTR_8g028845	Medtr8g028845.1_hypothetical_protein_LC_chr8:11163786-11165368_20140818
169.344	-2.15539	5.57e-05	0.0376401	MSTRG.1877.1	602	hypothetical protein	Medtr4g055800.1_hypothetical_protein_LC_chr4:20360859-20361911_20140818
56.5273	-2.20351	6.39e-05	0.0421796	MSTRG.76455.1	521	serine/threonine protein phosphatase 2A 55 kDa regulatory subunit B beta-like protein partial	Medtr2g100370.1_protein_phosphatase_2A_55_kDa_regulatory_subunit_B_HC_chr2:43120098-43128208_20140818
113.249	-2.34105	1.03e-05	0.0118513	117004_t	5718	Rpp4C4 putative	Medtr8g059275.1_Rpp4C4_putative_LC_chr8:20782997-20765328_20140818
75.417	-2.37707	1.41e-06	0.00236759	MSTRG.87364.2	794	PREDICTED: serine/threonine protein phosphatase 2A 55 kDa regulatory subunit B beta isoform isoform X1	Medtr1g040810.1_protein_phosphatase_2A_55_kDa_regulatory_subunit_B_HC_chr1:18464856-18466358_20140818
17.7937	-2.42245	1.28e-05	0.0138276	145163_t	2454	LRR receptor-like kinase family protein	Medtr1g039310.1_LRR_receptor-like_kinase_family_protein_LC_chr1:14501830-14505526_20140818
23.3441	-2.53709	5.97e-05	0.0401136	145165_t	2868	LRR receptor-like kinase family protein	Medtr1g038890.1_LRR_receptor-like_kinase_family_protein_LC_chr1:14465720-14469232_20140818
16.0012	-2.65616	8.29e-05	0.0488134	MSTRG.39741.9	1427	PREDICTED: coiled-coil domain-containing protein SCD2 isoform X2	Medtr3g498775.1_ripening-regulated_protein_HC_chr3:45145070-45136608_20140818
24.6552	-2.66248	8.09e-05	0.0480496	MSTRG.3865.2	1024	Ribonuclease H	Medtr8g470890.1_hypothetical_protein_LC_chr8:25759740-25759065_20140818
21.2859	-3.2079	6.33e-05	0.0420009	MSTRG.17068.1	1229	GRF zinc finger protein	Medtr5g047980.1_GRF_zinc_finger_protein_HC_chr5:21006200-21006919_20140818
22.1077	-3.52804	2.85e-08	8.55e-05	MSTRG.25940.1	979	---NA---	---NA---
11.1771	-4.21929	5.63e-07	0.00113576	15189_t	1545	saccharopine dehydrogenase	Medtr4g076230.1_saccharopine_dehydrogenase_HC_chr4:29193347-29200462_20140818

## Sheet: Table S3.2. Unique
Supporting information Table S3.2. Unique genes expressed only in nematode-infected plants of cv. Baker.
baseMean	log2 Fold Change	pvalue	padj	ID (this study)	Sequence Length	Sequence Description NCBI	Sequence description & ID, Medicago truncatula
Unique up-regulated genes expressed in nematode-infected cv. Baker
364.885	10.8189	3.54e-08	0.000102345	5198_t	2035	hypothetical protein	Medtr1g094040.1_hypothetical_protein_LC_chr1:42159025-42158606_20140818
1956.13	9.25896	6.76e-07	0.00126084	MSTRG.59767.2	1211	elongation factor 1-alpha	Medtr1g101870.1_elongation_factor_1-alpha_LC_chr1:45981685-45990868_20140818
1919.88	9.22907	7.64e-07	0.00138935	135388_t	1350	elongation factor 1-alpha	Medtr8g013910.1_elongation_factor_1-alpha_HC_chr8:4298149-4296399_20140818
301.133	9.01662	8.02e-07	0.00142205	MSTRG.79428.1	522	transmembrane protein putative	Medtr3g010283.1_transmembrane_protein_putative_LC_chr3:2395543-2393930_20140818
7.4329	7.82461	3.51e-06	0.00506288	MSTRG.46952.1	420	DUF4283 domain protein	Medtr1g093780.1_DUF4283_domain_protein_LC_chr1:42082356-42080689_20140818
22.5638	7.25307	7.3e-09	2.44e-05	115245_t	918	RNA-directed DNA polymerase	Medtr2g071820.1_LRR_and_NB-ARC_domain_disease_resistance_protein_LC_chr2:30006225-30010652_20140818
4.16395	6.23757	5.38e-05	0.0371997	37038_t	531	transmembrane protein putative	Medtr4g119380.1_transmembrane_protein_putative_LC_chr4:49424788-49425567_20140818
6.32113	6.13803	4.22e-06	0.00575162	183804_t	843	hypothetical protein TSUD_302460	Medtr7g111367.1_reverse_transcriptase_putative_LC_chr7:45714609-45713248_20140818
22.4886	6.11173	2.12e-07	0.000514932	3369_t	513	transmembrane protein putative	Medtr2g090075.1_transmembrane_protein_putative_LC_chr2:38149632-38149272_20140818
8.63855	5.86606	5.37e-05	0.0371997	MSTRG.3566.1	292	---NA---	---NA---
13.3495	5.85261	5.76e-06	0.00724581	161362_t	3888	valine--tRNA ligase mitochondrial 1 isoform X2	Medtr1g101620.1_valyl-tRNA_synthetase/valine-tRNA_ligase_HC_chr1:45900200-45890846_20140818
21.8061	5.81897	4.83e-09	1.74e-05	61937_t	345	NADH-cytochrome b5 reductase-like protein	Medtr4g114030.1_NADH-cytochrome_b5_reductase-like_protein_HC_chr4:46918728-46924991_20140818
14.5304	5.6164	2.81e-05	0.0245232	44826_t	3456	hypothetical protein MTR_6g033905	Medtr6g033905.1_hypothetical_protein_LC_chr6:11239740-11237785_20140818
21.0707	5.61209	3.6e-06	0.00515067	MSTRG.27514.1	722	glutaredoxin 2	Medtr3g072590.1_glutaredoxin_2_HC_chr3:32662344-32660930_20140818
5.89346	5.34157	4.18e-05	0.0317175	MSTRG.2104.1	368	hypothetical protein MTR_2g018760	Medtr2g018760.1_hypothetical_protein_LC_chr2:5952813-5952577_20140818
6.39113	5.3188	4.85e-05	0.0353614	MSTRG.23546.2	404	---NA---	---NA---
12.0976	5.29685	7.22e-05	0.0450598	MSTRG.88212.1	763	hypothetical protein TSUD_144220	hypothetical protein TSUD_144220 [Trifolium subterraneum]
6.31297	5.27218	5.23e-05	0.0368598	14587_t	441	potassium channel SKOR-like protein partial	Medtr5g077770.1_potassium_outward_rectifying_channel_protein_HC_chr5:33203844-33192709_20140818
13.2032	5.25627	4.16e-05	0.0317175	12534_t	3180	uncharacterized protein LOC101498519	Medtr8g464800.1_hypothetical_protein_LC_chr8:22967551-22968879_20140818
6.41917	5.23816	3e-05	0.0254125	12720_t	1899	hypothetical protein MTR_8g028785	Medtr8g028785.1_hypothetical_protein_LC_chr8:11109041-11107751_20140818
19.5812	5.19147	9.1e-07	0.00159502	7092_t	1071	ycf68 protein	Medtr4g006040.1_ycf68_protein_HC_chr4:489841-491171_20140818
155.211	5.16072	7.88e-05	0.0475547	MSTRG.31531.2	2426	transmembrane protein putative	Medtr3g076720.1_transmembrane_protein_putative_LC_chr3:34479302-34476397_20140818
31.6193	5.01	1.35e-05	0.0144926	MSTRG.56356.3	210	transmembrane protein	Medtr5g068680.1_transmembrane_protein_putative_LC_chr5:29087094-29087516_20140818
83.2854	4.98733	8.94e-08	0.000248445	MSTRG.81125.8	2250	hypothetical protein TSUD_13470	Medtr8g059275.1_hypothetical protein _LC_chr8:20782997-20765328_20140818
6.52406	4.92625	6e-05	0.0401377	MSTRG.67354.1	309	hypothetical protein	---NA---
12.2531	4.62067	5.33e-05	0.0371997	132824_t	1611	hypothetical protein	Medtr4g029100.1_hypothetical_protein_LC_chr4:10032648-10032427_20140818
13.2784	4.59568	2.8e-06	0.00425369	55368_t	786	rRNA intron-encoded homing endonuclease putative	Medtr0052s0110.1_rRNA_intron-encoded_homing_endonuclease_putative_HC_scaffold0052:50226-47921_20140818
20.1561	4.48847	3.29e-05	0.0268965	31032_t	2226	hypothetical protein TSUD_394910	Medtr8g015630.1_hypothetical_protein_LC_chr8:5150097-5151869_20140818
9.90786	4.30819	4.51e-05	0.0337062	64116_t	559	glyoxysomal fatty acid beta-oxidation MFP-A protein	Medtr6g087670.1_glyoxysomal_fatty_acid_beta-oxidation_MFP-A_protein_HC_chr6:32981575-32974721_20140818
23.3413	3.90387	4.41e-06	0.00595075	31031_t	2601	hypothetical protein TSUD_177560	Medtr0488s0020.1_DUF4283_domain_protein_LC_scaffold0488:4061-2543_20140818
20.8592	3.84549	4.72e-05	0.034717	96840_t	720	F-box protein interaction domain protein	Medtr0129s0050.1_F-box_protein_interaction_domain_protein_LC_scaffold0129:9393-10933_20140818
13.08	3.80788	7.48e-05	0.0458966	24742_t	471	hypothetical protein MTR_7g065860	Medtr7g065860.1_hypothetical_protein_HC_chr7:23906278-23905796_20140818
Unique down-regulated genes expressed in nematode-infected cv. Baker
23.6331	-4.58104	1.22e-05	0.0134934	MSTRG.11236.2	1235	sterol regulatory element-binding protein site 2 protease	Medtr4g010130.1_sterol_regulatory_element-binding_protein_site_2_protease_HC_chr4:2236279-2239946_20140818
6.15173	-5.59542	7.53e-05	0.0460072	MSTRG.47736.1	888	double-strand break repair protein Mre11	Medtr2g081100.2_double-strand_break_repair_protein_Mre11_HC_chr2:34007699-33996247_20140818
8.48788	-4.51051	7.32e-05	0.0454225	MSTRG.8195.1	602	---NA---	---NA---
