# Supplementary material for: Cellular and Transcriptional Responses of Resistant and Susceptible Cultivars of Alfalfa to the Root Lesion Nematode, Pratylenchus penetrans
Source: Front Plant Sci. 2019 Jul 31;10:971. doi: 10.3389/fpls.2019.00971 (PMC6685140; doi:10.3389/fpls.2019.00971)
Supplement: Supplementary file 4 [file Table_4.XLSX]

## Sheet: Table S4.1. DETs
Supporting information Table S4.1. Inter-cultivar differences (cv. MNGRN-16 vs. cv. Baker) in constitutive transcript expression under control conditions.
baseMean	log2 Fold Change	pvalue	padj	ID (this study)	Sequence Length	Sequence Description NCBI	Sequence description & ID, Medicago truncatula
338.752	9.22751	5.1e-14	6.99e-11	187112_t	1860	ribonuclease H	Medtr3g050240.1_NYN_domain_protein_LC_chr3:19796298-19799980_20140818
330.728	9.06642	9.06e-14	1.15e-10	MSTRG.39271.2	1244	NYN domain protein	Medtr3g050240.1_NYN_domain_protein_LC_chr3:19796298-19799980_20140818
538.984	8.88042	6.79e-24	7.02e-20	MSTRG.72718.1	1105	hypothetical protein L195_g034788	Medtr4g059830.1_hypothetical_protein_HC_chr4:22065876-22065212_20140818
228.345	8.63049	5.13e-13	5.72e-10	MSTRG.25180.10	1057	NYN domain protein	Medtr3g050240.1_NYN_domain_protein_LC_chr3:19796298-19799980_20140818
206.003	8.31723	6.17e-13	6.73e-10	104198_t	1770	ribonuclease H	Medtr3g050240.1_NYN_domain_protein_LC_chr3:19796298-19799980_20140818
171.967	8.23307	5.75e-27	8.1e-23	MSTRG.72851.1	379	---NA---	---NA---
342.966	7.81494	5.87e-12	4.64e-09	MSTRG.39271.4	1129	NYN domain protein	Medtr3g050240.1_NYN_domain_protein_LC_chr3:19796298-19799980_20140818
226.761	7.75375	2.03e-12	1.81e-09	MSTRG.25180.9	1038	NYN domain protein	Medtr3g050240.1_NYN_domain_protein_LC_chr3:19796298-19799980_20140818
494.459	7.61667	4.59e-10	1.98e-07	MSTRG.83882.2	938	---NA---	---NA---
319.424	7.37501	1.27e-16	3.86e-13	MSTRG.37267.2	1052	---NA---	---NA---
535.626	7.07872	9.11e-08	1.65e-05	MSTRG.25180.3	1275	NYN domain protein	Medtr3g050240.1_NYN_domain_protein_LC_chr3:19796298-19799980_20140818
550.172	7.02804	1.86e-10	9.57e-08	MSTRG.49016.1	810	hypothetical protein L195_g034788	Medtr3g461430.1_transmembrane_amino_acid_transporter_family_protein_HC_chr3:24400345-24405292_20140818
57.0725	6.8384	2.1e-07	3.25e-05	MSTRG.64101.2	4070	NBS-LRR type disease resistance protein	Medtr2g038760.1_NBS-LRR_type_disease_resistance_protein_LC_chr2:16974548-16978812_20140818
205.92	6.76505	2.27e-14	3.44e-11	MSTRG.82288.3	1916	adenine nucleotide alpha hydrolase superfamily protein	Medtr1g054765.1_adenine_nucleotide_alpha_hydrolase_superfamily_protein_HC_chr1:23937943-23936722_20140818
2827.64	6.59179	1.18e-07	2.02e-05	MSTRG.17314.2	1044	transmembrane protein, putative	Medtr2g083950.1_transmembrane_protein,_putative_LC_chr2:35242657-35243825_20140818
3020.82	6.53468	5.88e-08	1.14e-05	MSTRG.17314.1	1084	transmembrane protein, putative	Medtr2g083950.1_transmembrane_protein,_putative_LC_chr2:35242657-35243825_20140818
81.0035	6.48101	5.85e-07	7.4e-05	177673_t	1500	PREDICTED: uncharacterized protein LOC100790056	Medtr1g023240.1_hypothetical_protein_LC_chr1:7432015-7429412_20140818
147.657	6.35718	2.66e-07	3.94e-05	191159_t	936	NYN domain protein	Medtr3g050240.1_NYN_domain_protein_LC_chr3:19796298-19799980_20140818
193.161	6.14564	0.00034635	0.00952382	MSTRG.49353.1	1073	---NA---	Medtr6g037080.1_transmembrane_protein,_putative_LC_chr6:13033167-13032598_20140818
43.8462	5.96426	6.87e-07	8.39e-05	151242_t	6264	NBS-LRR type disease resistance protein	Medtr2g038760.1_NBS-LRR_type_disease_resistance_protein_LC_chr2:16974548-16978812_20140818
196.628	5.95723	0.000122972	0.00449531	MSTRG.85565.2	868	transmembrane protein, putative	Medtr1g103200.1_transmembrane_protein,_putative_LC_chr1:46693705-46692474_20140818
127.074	5.93293	1.84e-07	2.9e-05	MSTRG.48669.1	5628	Ty3/gypsy retrotransposon protein	Medtr7g029555.1_hypothetical_protein_LC_chr7:10634063-10633011_20140818
77.633	5.90913	5.29e-06	0.000410747	MSTRG.6141.3	321	transmembrane protein, putative	Medtr3g010283.1_transmembrane_protein,_putative_LC_chr3:2395543-2393930_20140818
316.598	5.83172	2.52e-21	1.95e-17	MSTRG.56814.1	206	ubiquitin extension protein	Medtr8g088060.1_ubiquitin-40S_ribosomal_S27a-like_protein_HC_chr8:36459811-36460782_20140818
100.285	5.63409	3.63e-05	0.00182931	MSTRG.25180.7	624	NYN domain protein	Medtr3g050240.1_NYN_domain_protein_LC_chr3:19796298-19799980_20140818
90.1244	5.60018	2.64e-10	1.26e-07	MSTRG.62816.2	328	---NA---	---NA---
79.8883	5.59962	3.23e-09	1.04e-06	MSTRG.42136.1	572	F-box/LRR protein, putative	Medtr1g056930.1_hypothetical_protein_LC_chr1:24926850-24927116_20140818
53.8863	5.58162	8.12e-13	8.44e-10	58948_t	1179	hypothetical protein L195_g059782, partial	Medtr4g116110.1_hypothetical_protein_LC_chr4:48012658-48012990_20140818
30.3108	5.49659	1.5e-09	5.47e-07	30656_t	618	transmembrane protein, putative	Medtr6g007480.1_hypothetical_protein_HC_chr6:1618191-1617627_20140818
551.102	5.47764	6.99e-15	1.19e-11	76635_t	876	rRNA intron-encoded homing endonuclease, putative	Medtr0055s0130.1_hypothetical_protein_HC_scaffold0055:73353-68450_20140818
89.6191	5.45922	5.48e-06	0.000422406	MSTRG.25180.6	626	NYN domain protein	Medtr3g050240.1_NYN_domain_protein_LC_chr3:19796298-19799980_20140818
501.536	5.43676	1.85e-12	1.68e-09	MSTRG.62769.2	2629	replication factor-A carboxy-terminal domain protein	Medtr2g450060.1_replication_factor-A_carboxy-terminal_domain_protein_LC_chr2:22081675-22078797_20140818
76.0288	5.42427	1.88e-21	1.53e-17	MSTRG.37927.2	1474	transmembrane protein, putative	Medtr1412s0010.1_transmembrane_protein,_putative_LC_scaffold1412:564-27_20140818
61.1937	5.42206	5.96e-06	0.000448089	MSTRG.56208.4	2503	PREDICTED: uncharacterized protein LOC105853135	Medtr4g026570.1_hypothetical_protein_LC_chr4:9142766-9142245_20140818
94.7406	5.41876	2.56e-09	8.66e-07	MSTRG.24158.2	1899	transmembrane protein, putative	Medtr0200s0020.1_hypothetical_protein_LC_scaffold0200:18198-19518_20140818
112.664	5.36343	2.76e-07	4.03e-05	MSTRG.52655.3	1951	replication factor-A carboxy-terminal domain protein	Medtr2g450060.1_replication_factor-A_carboxy-terminal_domain_protein_LC_chr2:22081675-22078797_20140818
143.197	5.35625	6.77e-08	1.28e-05	MSTRG.52655.1	2230	replication factor-A carboxy-terminal domain protein	Medtr2g450060.1_replication_factor-A_carboxy-terminal_domain_protein_LC_chr2:22081675-22078797_20140818
37.2647	5.33254	8e-11	4.52e-08	77396_t	375	transmembrane protein, putative	Medtr3g016290.1_transmembrane_protein,_putative_HC_chr3:4860833-4859855_20140818
90.6712	5.29288	1.42e-09	5.22e-07	MSTRG.52176.1	2081	transmembrane protein, putative	Medtr0200s0020.1_hypothetical_protein_LC_scaffold0200:18198-19518_20140818
244.103	5.27651	3.65e-11	2.27e-08	164310_t	1611	replication factor-A carboxy-terminal domain protein	Medtr2g450060.1_replication_factor-A_carboxy-terminal_domain_protein_LC_chr2:22081675-22078797_20140818
95.3169	5.13807	8.9e-10	3.47e-07	MSTRG.62816.1	328	---NA---	---NA---
53.5979	5.13072	4.78e-06	0.000379564	MSTRG.25180.2	820	NYN domain protein	Medtr3g050240.1_NYN_domain_protein_LC_chr3:19796298-19799980_20140818
26.6967	5.08077	3.61e-08	7.52e-06	34804_t	939	---NA---	Medtr3g461430.1_transmembrane_amino_acid_transporter_family_protein_HC_chr3:24400345-24405292_20140818
75.891	5.0669	4.56e-06	0.00036598	MSTRG.71524.2	2761	PREDICTED: uncharacterized protein LOC105853135	Medtr4g026570.1_hypothetical_protein_LC_chr4:9142766-9142245_20140818
42.2282	5.05244	9.4e-12	6.93e-09	MSTRG.27228.2	612	---NA---	---NA---
28.1141	5.03241	1.44e-07	2.39e-05	123419_t	4200	gag-pol polyprotein	Medtr2g054400.1_hypothetical_protein_LC_chr2:23238019-23238738_20140818
144.932	5.02183	1.01e-06	0.000113232	MSTRG.52655.2	2519	replication factor-A carboxy-terminal domain protein	Medtr2g450060.1_replication_factor-A_carboxy-terminal_domain_protein_LC_chr2:22081675-22078797_20140818
100.424	5.00306	5.56e-06	0.000425963	MSTRG.74321.2	2498	PREDICTED: uncharacterized protein LOC105853135	Medtr4g026570.1_hypothetical_protein_LC_chr4:9142766-9142245_20140818
33.1177	5.00153	3.42e-10	1.55e-07	MSTRG.30543.3	2419	drug resistance transporter-like ABC domain protein	Medtr4g011640.1_drug_resistance_transporter-like_ABC_domain_protein_HC_chr4:2903046-2892454_20140818
45.0981	4.97841	2.55e-10	1.23e-07	2101_t	1989	plant phospholipase-like protein	Medtr8g089500.1_plant_phospholipase-like_protein_HC_chr8:37204184-37202286_20140818
34.7075	4.96202	4.01e-10	1.76e-07	37861_t	3342	PREDICTED: uncharacterized protein LOC100790056	Medtr2g020090.1_hypothetical_protein_HC_chr2:6661981-6659686_20140818
172.484	4.93476	4.77e-10	2.05e-07	MSTRG.9198.13	1149	aldo/keto reductase family oxidoreductase	Medtr4g021410.1_aldo/keto_reductase_family_oxidoreductase_HC_chr4:6956705-6962668_20140818
55.6229	4.9179	0.000358766	0.00977137	83680_t	3999	ribonuclease H	Medtr1g054775.1_endonuclease/exonuclease/phosphatase_family_protein_LC_chr1:23942081-23949866_20140818
41.3709	4.90791	3.02e-09	9.91e-07	MSTRG.47662.1	641	transmembrane protein, putative	Medtr5g080330.1_aspartic_protease_family_protein,_putative_LC_chr5:34380900-34377963_20140818
47.3173	4.9029	3.7e-06	0.000313074	152764_t	5418	gag-pol polyprotein	Medtr2g054400.1_hypothetical_protein_LC_chr2:23238019-23238738_20140818
48.5878	4.88615	9.41e-11	5.21e-08	MSTRG.82288.16	1940	adenine nucleotide alpha hydrolase superfamily protein	Medtr1g054765.1_adenine_nucleotide_alpha_hydrolase_superfamily_protein_HC_chr1:23937943-23936722_20140818
41.1255	4.88237	2.73e-10	1.29e-07	MSTRG.59515.3	554	hypothetical protein MTR_5g073180	Medtr5g073180.1_hypothetical_protein_HC_chr5:31142359-31140039_20140818
89.8592	4.88193	1.07e-06	0.000119217	117985_t	1716	replication factor-A carboxy-terminal domain protein	Medtr2g450060.1_replication_factor-A_carboxy-terminal_domain_protein_LC_chr2:22081675-22078797_20140818
208.232	4.8497	1.02e-12	1.01e-09	MSTRG.9198.5	1344	aldo/keto reductase family oxidoreductase	Medtr4g021410.1_aldo/keto_reductase_family_oxidoreductase_HC_chr4:6956705-6962668_20140818
34.7136	4.77626	6.22e-09	1.82e-06	11730_t	471	transmembrane protein, putative	Medtr3g464390.1_transmembrane_protein,_putative_HC_chr3:25876284-25870412_20140818
175.204	4.74669	0.000590475	0.0138707	MSTRG.6580.1	283	---NA---	---NA---
98.0944	4.7355	0.000454772	0.0115537	MSTRG.87541.1	288	---NA---	---NA---
70.0195	4.73336	0.00211897	0.033566	166047_t	3279	mediator of RNA polymerase II transcription subunit 16	Medtr2g013160.1_mediator_of_RNA_polymerase_II_transcription_subunit_16_HC_chr2:3502342-3493885_20140818
177.498	4.69505	3.46e-11	2.17e-08	MSTRG.75555.3	262	---NA---	---NA---
211.152	4.67228	8.36e-09	2.31e-06	MSTRG.9889.37	739	proline-rich protein	proline-rich protein
54.5791	4.63553	9.23e-05	0.00363748	MSTRG.67771.1	374	expansin-B1-like protein	Medtr4g099400.1_expansin-B1-like_protein_HC_chr4:41244357-41245315_20140818
45.4992	4.63553	2.51e-05	0.00137691	MSTRG.47715.2	393	---NA---	---NA---
178.302	4.55447	1.19e-09	4.48e-07	MSTRG.35259.1	213	---NA---	---NA---
84.4306	4.55068	0.000139845	0.00493283	MSTRG.29788.2	415	---NA---	---NA---
42.286	4.54407	4.26e-09	1.32e-06	MSTRG.8253.2	1081	disease resistance protein (TIR-NBS-LRR class)	Medtr5g071610.2_disease_resistance_protein_(TIR-NBS-LRR_class),_putative_LC_chr5:30414519-30420343_20140818
117.695	4.48803	2.47e-24	2.73e-20	MSTRG.9198.9	1278	aldo-keto reductase family 4 member C10-like	Medtr4g021410.1_aldo/keto_reductase_family_oxidoreductase_HC_chr4:6956705-6962668_20140818
741.884	4.44542	3.02e-11	1.94e-08	MSTRG.48791.1	419	Regulator of rDNA transcription protein 15	Medtr0055s0050.1_senescence-associated_protein,_putative_HC_scaffold0055:18043-14674_20140818
175.346	4.42644	2.22e-24	2.64e-20	128875_t	3978	DUF4283 domain protein	Medtr7g445700.1_DUF4283_domain_protein_LC_chr7:15486160-15484152_20140818
33.6129	4.41823	3.2e-07	4.53e-05	MSTRG.37251.1	643	PIF1-like helicase	Medtr0022s0370.1_PIF1-like_helicase_LC_scaffold0022:127061-125862_20140818
51.0071	4.4118	5.67e-10	2.36e-07	125436_t	1959	aldo/keto reductase family oxidoreductase	Medtr4g021450.1_aldo/keto_reductase_family_oxidoreductase_HC_chr4:6976199-6978784_20140818
34.891	4.41163	1.34e-08	3.34e-06	MSTRG.8602.1	646	---NA---	Medtr4g108010.1_DUF4283_domain_protein_LC_chr4:44771398-44772009_20140818
207.898	4.33927	5.68e-14	7.65e-11	MSTRG.48622.1	1112	---NA---	---NA---
31.5891	4.30915	1.42e-07	2.36e-05	MSTRG.52319.1	441	molybdenum cofactor sulfurase	Medtr4g102890.2_hypothetical_protein_HC_chr4:42656308-42654340_20140818
36.4327	4.27645	2.59e-10	1.24e-07	MSTRG.85508.14	1200	PPR containing plant protein	Medtr6g024415.1_PPR_containing_plant_protein_LC_chr6:8744390-8743759_20140818
39.1653	4.26057	3.2e-11	2.04e-08	MSTRG.35694.1	382	---NA---	---NA---
53.3989	4.25843	7.69e-09	2.17e-06	MSTRG.27228.1	889	---NA---	---NA---
36.0452	4.25389	1.5e-08	3.66e-06	MSTRG.59326.15	1259	transducin family protein/WD-40 repeat protein	Medtr4g114930.1_transducin_family_protein/WD-40_repeat_protein_HC_chr4:47361809-47381261_20140818
63.9967	4.2357	8.38e-13	8.64e-10	81007_t	3938	hypothetical protein MTR_3g047490	Medtr3g047490.1_hypothetical_protein_LC_chr3:15837441-15836470_20140818
355.05	4.16765	6.32e-05	0.00275841	MSTRG.70179.2	1183	transmembrane protein, putative	Medtr2g083950.1_transmembrane_protein,_putative_LC_chr2:35242657-35243825_20140818
40.7989	4.15077	0.000643818	0.0147721	115314_t	1224	transmembrane protein, putative	Medtr6g078770.1_transmembrane_protein,_putative_HC_chr6:29607965-29613244_20140818
29.3295	4.14742	4.82e-05	0.00225517	MSTRG.78087.1	275	---NA---	---NA---
25.1404	4.14012	8.39e-06	0.000586639	MSTRG.80467.1	1346	dynamin-like protein	Medtr4g022340.1_dynamin-like_protein_HC_chr4:7369959-7371527_20140818
93.1446	4.13435	0.000633668	0.0146042	3591_t	2097	Putative AC transposase	Medtr4g036325.1_hypothetical_protein_LC_chr4:13081348-13082899_20140818
68.14	4.1171	0.000137743	0.00487314	78554_t	5442	ribonuclease H	Medtr8g089800.1_cytochrome_P450_family_88_protein_HC_chr8:37431289-37437039_20140818
43.1429	4.10251	1.14e-06	0.000124692	MSTRG.27228.4	780	---NA---	---NA---
71.8545	4.09864	0.000131721	0.00471694	MSTRG.18834.1	1311	transmembrane protein, putative	Medtr6g078770.1_transmembrane_protein,_putative_HC_chr6:29607965-29613244_20140818
51.2702	4.08162	2.14e-07	3.3e-05	MSTRG.59326.7	2064	pre-mRNA-splicing factor RSE1-like protein	Medtr7g107350.3_pre-mRNA-splicing_factor_RSE1-like_protein_HC_chr7:43800656-43788689_20140818
51.0164	4.0778	2.93e-09	9.71e-07	MSTRG.63214.1	2416	transmembrane protein, putative	Medtr5g048560.1_transmembrane_protein,_putative_LC_chr5:21253619-21256479_20140818
1255.81	4.06209	4.87e-05	0.00227124	MSTRG.9889.54	717	proline-rich protein	proline-rich protein
39.0378	4.05899	0.000818944	0.0174539	178181_t	1224	transmembrane protein, putative	Medtr6g078770.1_transmembrane_protein,_putative_HC_chr6:29607965-29613244_20140818
22.7421	4.04621	6.85e-05	0.00292691	171951_t	1371	glutamine synthetase	Medtr5g077950.1_glutamine_synthetase_domain_protein_HC_chr5:33280056-33276532_20140818
53.204	4.0251	3.98e-05	0.00195597	MSTRG.8560.1	275	---NA---	---NA---
149.839	3.99613	6.28e-08	1.2e-05	MSTRG.14320.1	5217	ATP-dependent DNA helicase PIF1	Medtr2g089470.1_PIF1-like_helicase_LC_chr2:37822429-37825668_20140818
87.2044	3.99271	0.000816711	0.0174183	MSTRG.77753.1	491	---NA---	---NA---
51.1598	3.98502	7.31e-09	2.08e-06	145604_t	4506	drug resistance transporter-like ABC domain protein	Medtr4g011640.1_drug_resistance_transporter-like_ABC_domain_protein_HC_chr4:2903046-2892454_20140818
32.9911	3.97504	4.82e-05	0.00225517	MSTRG.56986.1	787	replication factor-A carboxy-terminal domain protein	Medtr4g085760.1_replication_factor-A_carboxy-terminal_domain_protein_LC_chr4:33538359-33540924_20140818
87.569	3.97289	0.000612537	0.0142379	MSTRG.52825.1	491	---NA---	---NA---
100.696	3.96563	0.000135468	0.00481151	MSTRG.79394.1	573	---NA---	---NA---
58.6726	3.96224	1.58e-11	1.11e-08	49011_t	2163	hypothetical protein DCAR_001521	Medtr4g006070.1_hypothetical_protein_HC_chr4:495841-493796_20140818
53.078	3.9566	1.19e-08	3.05e-06	MSTRG.30543.1	4711	drug resistance transporter-like ABC domain protein	Medtr4g011640.1_drug_resistance_transporter-like_ABC_domain_protein_HC_chr4:2903046-2892454_20140818
57.8494	3.94799	1.62e-11	1.12e-08	111998_t	885	ycf68 protein	Medtr4g006040.1_ycf68_protein_HC_chr4:489841-491171_20140818
27.6532	3.94374	9.68e-07	0.000110213	27378_t	5478	PREDICTED: uncharacterized protein LOC104894399	Medtr8g463500.1_hypothetical_protein_LC_chr8:22359101-22360522_20140818
1281.22	3.94091	2.08e-12	1.84e-09	74973_t	1261	hypothetical protein TanjilG_08066, partial	Medtr0052s0140.1_hypothetical_protein_HC_scaffold0052:65682-64147_20140818
58.1863	3.93428	2.92e-11	1.89e-08	87286_t	1644	ycf68 protein	Medtr4g006040.1_ycf68_protein_HC_chr4:489841-491171_20140818
57.1852	3.92945	4.06e-11	2.49e-08	117449_t	396	elongation factor 1-alpha	Medtr6g086840.1_hypothetical_protein_LC_chr6:32755844-32757031_20140818
22.3017	3.92346	1.76e-06	0.000176223	MSTRG.62388.1	300	---NA---	---NA---
42.2583	3.91418	2.41e-07	3.62e-05	MSTRG.20363.1	233	cytoplasmic-like aconitate hydratase	Medtr2g067620.1_cytoplasmic-like_aconitate_hydratase_HC_chr2:28312952-28303191_20140818
2987.74	3.90311	0.00254636	0.0380637	MSTRG.58896.8	685	---NA---	---NA---
91.5613	3.89053	3.58e-10	1.61e-07	MSTRG.42134.2	957	major intrinsic protein (MIP) family transporter	Medtr1g056930.1_hypothetical_protein_LC_chr1:24926850-24927116_20140818
25.768	3.82501	2.08e-06	0.000201012	MSTRG.5242.1	274	hypothetical protein MTR_8g479440	Medtr8g479440.1_hypothetical_protein_LC_chr8:33880932-33879676_20140818
2707.5	3.81768	0.00110202	0.0215375	MSTRG.58896.50	616	---NA---	---NA---
116.903	3.81169	0.000145009	0.00506883	MSTRG.69094.1	5148	ATP-dependent DNA helicase PIF1	Medtr2g089470.1_PIF1-like_helicase_LC_chr2:37822429-37825668_20140818
86.2422	3.79934	4.32e-12	3.52e-09	MSTRG.21477.7	204	---NA---	Medtr5g032670.1_hypothetical_protein_HC_chr5:14074645-14075917_20140818
30.2755	3.79623	0.00224394	0.0349102	MSTRG.84634.2	1569	eukaryotic initiation factor 4A-3	Medtr2g438110.1_DEAD-box_ATP-dependent_RNA_helicase_HC_chr2:15371233-15366440_20140818
45.4392	3.78323	5.69e-06	0.000432644	MSTRG.49286.1	1134	hypothetical protein MTR_2g438560	Medtr2g438560.1_hypothetical_protein_HC_chr2:15589330-15587523_20140818
75.8631	3.78028	0.00011733	0.00433819	2604_t	1197	transmembrane protein, putative	Medtr6g078770.1_transmembrane_protein,_putative_HC_chr6:29607965-29613244_20140818
36.6777	3.77451	2.95e-05	0.00156234	MSTRG.76898.1	1209	---NA---	---NA---
151.194	3.7613	2.71e-07	3.98e-05	MSTRG.14320.4	4095	ATP-dependent DNA helicase PIF1	Medtr2g089470.1_PIF1-like_helicase_LC_chr2:37822429-37825668_20140818
67.3791	3.73848	1.47e-05	0.000916889	90670_t	1752	ATP-dependent DNA helicase PIF1	Medtr7g022020.1_PIF1-like_helicase_LC_chr7:7038991-7036186_20140818
38.1494	3.7257	4.82e-07	6.33e-05	MSTRG.36468.2	722	digestive organ expansion factor-like protein	Medtr3g082340.1_hypothetical_protein_HC_chr3:37159184-37161016_20140818
68.96	3.72536	1.56e-05	0.000958167	MSTRG.79598.2	1015	glycoside hydrolase family 1 protein	Medtr4g081530.1_glycoside_hydrolase_family_1_protein_HC_chr4:31637194-31641130_20140818
212.184	3.70728	5.4e-20	3.48e-16	MSTRG.69046.1	397	potato type II proteinase inhibitor family protein	Medtr4g032865.1_potato_type_II_proteinase_inhibitor_family_protein_HC_chr4:11363448-11362693_20140818
29.7883	3.70377	3.09e-07	4.4e-05	MSTRG.85306.1	248	pathogenesis-related thaumatin family protein	Medtr8g096920.1_pathogenesis-related_thaumatin_family_protein_HC_chr8:40682449-40681554_20140818
27.3916	3.67704	2.58e-05	0.00140498	MSTRG.54081.1	395	---NA---	---NA---
107.976	3.67659	6.78e-17	2.1e-13	MSTRG.63173.20	1905	LRR and NB-ARC domain disease resistance protein	Medtr3g435040.6_LRR_and_NB-ARC_domain_disease_resistance_protein_LC_chr3:11407461-11421317_20140818
78.9014	3.67258	7.09e-09	2.03e-06	MSTRG.19695.1	1572	---NA---	---NA---
60.3347	3.66744	3.1e-05	0.00162659	153624_t	1473	probable methyltransferase PMT13	Medtr7g076150.2_methyltransferase_PMT16,_putative_HC_chr7:28629548-28623929_20140818
59.9329	3.66038	5.83e-08	1.13e-05	52004_t	1752	ATP-dependent DNA helicase PIF1	Medtr7g022020.1_PIF1-like_helicase_LC_chr7:7038991-7036186_20140818
2263.58	3.65815	4.15e-11	2.52e-08	MSTRG.23163.1	216	---NA---	---NA---
30.0091	3.64811	9.36e-07	0.000107453	MSTRG.51950.1	951	hypothetical protein MTR_4g117240	Medtr4g117240.1_hypothetical_protein_LC_chr4:48577254-48575775_20140818
103.308	3.64621	4.43e-07	5.89e-05	81969_t	7437	ATP-dependent DNA helicase PIF1	Medtr5g018790.1_OTU-like_cysteine_protease_HC_chr5:7021030-7018511_20140818
3460.04	3.63651	0.00373577	0.0491886	MSTRG.58896.1	576	---NA---	---NA---
33.2886	3.60397	1.19e-05	0.000770742	MSTRG.44802.4	660	---NA---	Medtr6g032995.1_transmembrane_amino_acid_transporter_family_protein_HC_chr6:10305757-10308331_20140818
45.9442	3.58807	0.000789302	0.0170544	MSTRG.79822.3	1051	---NA---	---NA---
83.735	3.56039	1.51e-10	7.97e-08	MSTRG.71519.1	227	---NA---	---NA---
1628.23	3.51694	5.98e-09	1.77e-06	MSTRG.48791.2	316	senescence-associated protein, putative	Medtr0052s0090.1_senescence-associated_protein,_putative_HC_scaffold0052:43283-43667_20140818
79.2584	3.51254	0.000240971	0.00731015	MSTRG.69094.4	1971	ATP-dependent DNA helicase PIF1	Medtr8g447120.1_AT_hook_motif_protein,_putative_LC_chr8:18486456-18487766_20140818
39.0867	3.51171	9.09e-13	9.2e-10	MSTRG.85564.1	221	LRR receptor-like kinase family protein	Medtr2g098250.1_LRR_receptor-like_kinase_family_protein_HC_chr2:41999106-41997376_20140818
72.4986	3.51063	1.36e-10	7.31e-08	MSTRG.17913.1	260	---NA---	---NA---
7126.07	3.50674	0.00107853	0.021204	MSTRG.58896.11	603	hypothetical protein KK1_048371	hypothetical protein KK1_048371
6877.83	3.49418	0.000923323	0.0190953	MSTRG.58896.46	587	hypothetical protein KK1_048371	hypothetical protein KK1_048371
40.018	3.48352	2.63e-07	3.9e-05	MSTRG.40417.3	928	replication factor-A carboxy-terminal domain protein	Medtr2g450060.1_replication_factor-A_carboxy-terminal_domain_protein_LC_chr2:22081675-22078797_20140818
45.2461	3.48056	0.00282694	0.0409112	MSTRG.88212.3	1730	retrovirus-related Pol polyprotein from transposon TNT 1-94	Medtr7g039280.1_hypothetical_protein_LC_chr7:14583454-14584237_20140818
61.3826	3.46778	1.86e-09	6.6e-07	187966_t	923	ycf68 protein	Medtr4g006040.1_ycf68_protein_HC_chr4:489841-491171_20140818
77.3577	3.45801	5.26e-18	2.26e-14	MSTRG.9198.12	1284	aldo-keto reductase family 4 member C10-like	Medtr4g021410.1_aldo/keto_reductase_family_oxidoreductase_HC_chr4:6956705-6962668_20140818
268.226	3.45524	1.41e-07	2.35e-05	MSTRG.48791.3	458	senescence-associated protein, putative	Medtr0055s0050.1_senescence-associated_protein,_putative_HC_scaffold0055:18043-14674_20140818
40.6497	3.4542	2.93e-09	9.71e-07	MSTRG.82890.3	210	GTP-binding protein TypA/BipA	Medtr4g079360.1_GTP-binding_protein_TypA/BipA_HC_chr4:30669016-30656018_20140818
82.4596	3.45331	0.00146101	0.0260913	MSTRG.33073.2	3280	LRR and NB-ARC domain disease resistance protein	Medtr7g018850.1_LRR_and_NB-ARC_domain_disease_resistance_protein_LC_chr7:6251896-6245587_20140818
53.9477	3.43518	3.05e-06	0.000270172	MSTRG.48711.1	376	transmembrane protein, putative	Medtr5g080330.1_aspartic_protease_family_protein,_putative_LC_chr5:34380900-34377963_20140818
42.2746	3.43253	1.09e-05	0.000721107	44869_t	348	cytoplasmic-like aconitate hydratase	Medtr2g067620.1_cytoplasmic-like_aconitate_hydratase_HC_chr2:28312952-28303191_20140818
50.1208	3.43035	1.26e-06	0.000135467	MSTRG.67770.1	1292	expansin-B1-like protein	Medtr4g099400.1_expansin-B1-like_protein_HC_chr4:41244357-41245315_20140818
3133.31	3.422	5.32e-12	4.23e-09	MSTRG.48793.2	1116	senescence-associated protein	Medtr0052s0140.1_hypothetical_protein_HC_scaffold0052:65682-64147_20140818
38.5504	3.42169	5.84e-09	1.73e-06	MSTRG.15235.4	1514	hypothetical protein L195_g007647, partial	Medtr4g057493.1_hypothetical_protein_HC_chr4:21044673-21038663_20140818
44.7758	3.41749	3.5e-07	4.89e-05	MSTRG.19696.1	1078	---NA---	---NA---
96.9549	3.41211	2.91e-05	0.00154763	MSTRG.76898.2	2644	---NA---	---NA---
167.568	3.40401	4.72e-16	1.2e-12	MSTRG.70088.2	888	replication factor-A carboxy-terminal domain protein	Medtr1g492690.1_hypothetical_protein_HC_chr1:41541171-41539306_20140818
80.5542	3.40038	0.00173705	0.0293956	MSTRG.33073.1	3288	LRR and NB-ARC domain disease resistance protein	Medtr7g018850.1_LRR_and_NB-ARC_domain_disease_resistance_protein_LC_chr7:6251896-6245587_20140818
48.4791	3.39758	5.55e-06	0.000425219	MSTRG.36463.1	585	hypothetical protein MTR_6g034890	Medtr6g034890.1_hypothetical_protein_HC_chr6:12188629-12189045_20140818
67.4153	3.39543	1.13e-07	1.96e-05	MSTRG.27228.3	1380	---NA---	---NA---
49.5659	3.39461	7.24e-09	2.07e-06	17912_t	408	transmembrane protein, putative	Medtr7g091060.1_transmembrane_protein,_putative_HC_chr7:35919905-35921964_20140818
79.2111	3.39299	9.38e-09	2.53e-06	188426_t	1332	cytochrome p450	Medtr5g073180.1_hypothetical_protein_HC_chr5:31142359-31140039_20140818
42.727	3.38591	1.88e-06	0.00018616	12715_t	1560	aconitate hydratase, cytoplasmic-like	Medtr2g067620.1_cytoplasmic-like_aconitate_hydratase_HC_chr2:28312952-28303191_20140818
143.838	3.38514	2e-13	2.36e-10	MSTRG.42649.2	3291	LRR and NB-ARC domain disease resistance protein	Medtr7g018850.1_LRR_and_NB-ARC_domain_disease_resistance_protein_LC_chr7:6251896-6245587_20140818
52.9525	3.38345	0.00175627	0.0296324	MSTRG.55411.3	1790	PCF11P-related protein	Medtr6g011450.1_PCF11P-related_protein_HC_chr6:3246456-3252804_20140818
27.4737	3.38056	3.7e-06	0.000313137	MSTRG.43808.1	654	DUF506 family protein	Medtr8g093440.2_DUF506_family_protein_HC_chr8:39027454-39025942_20140818
38.3826	3.37725	2.15e-05	0.00121635	MSTRG.17308.1	534	---NA---	---NA---
134.918	3.35784	0.000676939	0.0153132	MSTRG.29788.1	2526	ribonuclease H	Medtr7g111367.1_reverse_transcriptase,_putative_LC_chr7:45714609-45713248_20140818
64.1841	3.35569	0.0013166	0.0242511	50495_t	3120	LRR and NB-ARC domain disease resistance protein	Medtr7g018850.1_LRR_and_NB-ARC_domain_disease_resistance_protein_LC_chr7:6251896-6245587_20140818
44.0877	3.35142	5.64e-10	2.36e-07	MSTRG.38868.1	236	---NA---	---NA---
133.85	3.35013	1.28e-06	0.000137747	MSTRG.27513.1	993	transmembrane emp24 domain-containing protein p24delta3-like	Medtr3g072600.1_emp24/gp25L/p24_family_protein_HC_chr3:32665033-32662918_20140818
35.9886	3.34705	8.25e-05	0.00334543	MSTRG.74050.1	1754	endoglucanase 1	Medtr3g080810.1_glycosyl_hydrolase_family_9_protein_HC_chr3:36575499-36572815_20140818
47.1957	3.33118	5.25e-06	0.000408735	MSTRG.65611.1	818	---NA---	---NA---
134.157	3.31355	0.000919651	0.0190346	172350_t	3144	CC-NBS-LRR resistance protein	Medtr8g028500.1_Rpp4C1_HC_chr8:10848011-10860059_20140818
136.756	3.30797	0.000389875	0.0103852	MSTRG.67770.6	1117	expansin-like B1	Medtr4g099370.1_expansin-B1-like_protein_HC_chr4:41232063-41233559_20140818
22.1469	3.30756	0.00129372	0.0239888	MSTRG.6028.1	294	---NA---	---NA---
66.258	3.29842	1.17e-06	0.000127324	MSTRG.5200.1	1398	cytoplasmic-like aconitate hydratase	Medtr2g088360.1_cytoplasmic-like_aconitate_hydratase_HC_chr2:37230917-37240757_20140818
1293.71	3.29683	3.43e-10	1.55e-07	MSTRG.20670.1	657	transmembrane protein, putative	Medtr3g016080.1_transmembrane_protein,_putative_LC_chr3:4763213-4761952_20140818
153.03	3.29263	0.00229631	0.0354968	101875_t	4278	copia protein	Medtr0134s0080.1_hypothetical_protein_LC_scaffold0134:28216-28944_20140818
136.169	3.29045	0.00129319	0.023986	190477_t	4119	copia protein	Medtr0134s0080.1_hypothetical_protein_LC_scaffold0134:28216-28944_20140818
37.4664	3.28931	8.82e-08	1.62e-05	118304_t	1284	hypothetical protein MTR_0186s0120	Medtr0186s0120.1_hypothetical_protein_HC_scaffold0186:29633-29262_20140818
762.919	3.2753	0.000709406	0.0158215	MSTRG.67662.9	1170	GABA transporter 1-like	Medtr4g055610.1_transmembrane_amino_acid_transporter_family_protein_HC_chr4:20285002-20289374_20140818
29.6147	3.27343	5.21e-06	0.000406854	MSTRG.80201.1	355	---NA---	---NA---
6301.03	3.26851	9e-11	5e-08	MSTRG.57138.1	421	protein TAR1-like	Medtr0055s0030.1_hypothetical_protein_HC_scaffold0055:6527-3946_20140818
36.3038	3.26593	8.25e-07	9.76e-05	MSTRG.63201.7	421	---NA---	---NA---
192.217	3.25427	0.000982742	0.0199229	MSTRG.2684.1	2507	paired amphipathic helix protein Sin3-like 4 isoform X4	Medtr5g036670.1_paired_amphipathic_helix_SIN3-like_protein_HC_chr5:16035547-16020987_20140818
34.2326	3.25411	3.17e-05	0.00165182	MSTRG.59326.13	1734	pre-mRNA-splicing factor RSE1-like protein	Medtr7g107350.1_pre-mRNA-splicing_factor_RSE1-like_protein_HC_chr7:43803096-43788689_20140818
52.6394	3.23819	4.21e-06	0.000344088	MSTRG.55065.1	579	hypothetical protein MTR_6g034890	Medtr6g034890.1_hypothetical_protein_HC_chr6:12188629-12189045_20140818
82.3567	3.22083	0.000187572	0.00611513	MSTRG.5200.2	1333	cytoplasmic-like aconitate hydratase	Medtr2g088360.1_cytoplasmic-like_aconitate_hydratase_HC_chr2:37230917-37240757_20140818
139.427	3.22041	3.22e-12	2.69e-09	MSTRG.42649.3	3280	LRR and NB-ARC domain disease resistance protein	Medtr7g018850.1_LRR_and_NB-ARC_domain_disease_resistance_protein_LC_chr7:6251896-6245587_20140818
2515.76	3.20747	3.83e-09	1.21e-06	MSTRG.62469.1	672	transmembrane protein, putative	Medtr3g016080.1_transmembrane_protein,_putative_LC_chr3:4763213-4761952_20140818
82.1701	3.19959	7.11e-05	0.00300629	MSTRG.21006.2	3008	disease resistance protein (TIR-NBS-LRR class), putative	Medtr7g078180.1_disease_resistance_protein_(TIR-NBS-LRR_class),_putative_LC_chr7:29570689-29575843_20140818
53.7662	3.19892	6.13e-13	6.73e-10	MSTRG.22721.6	684	---NA---	---NA---
91.6976	3.19533	1.4e-11	9.9e-09	MSTRG.68758.1	2924	plant phospholipase-like protein	Medtr8g089500.1_plant_phospholipase-like_protein_HC_chr8:37204184-37202286_20140818
785.855	3.17933	7.18e-09	2.05e-06	106000_t	744	DnaJ heat shock amino-terminal domain protein	Medtr1g112910.2_DnaJ_heat_shock_amino-terminal_domain_protein_HC_chr1:51197052-51199906_20140818
41.2458	3.17761	7.59e-05	0.00315047	MSTRG.60095.1	1541	phosphatidylinositol-4-phosphate 5-kinase	Medtr8g080860.1_phosphatidylinositol-4-phosphate_5-kinase_LC_chr8:34916953-34915979_20140818
61.9738	3.17353	2.02e-11	1.38e-08	163455_t	576	multiprotein-bridging factor 1b	Medtr4g080090.1_multiprotein_bridging_factor_1b-like_protein_HC_chr4:31042066-31045251_20140818
36.9858	3.17254	0.00356564	0.0477169	MSTRG.79822.4	751	---NA---	---NA---
58.8474	3.17048	6.51e-06	0.000481428	MSTRG.5200.3	1076	aconitate hydratase, cytoplasmic	Medtr4g048190.1_cytoplasmic-like_aconitate_hydratase_HC_chr4:17044934-17035507_20140818
26.1371	3.15793	0.00260369	0.0386516	142216_t	2703	ribonuclease H	Medtr1g054775.1_endonuclease/exonuclease/phosphatase_family_protein_LC_chr1:23942081-23949866_20140818
25.8421	3.15452	9.98e-06	0.000674231	MSTRG.3336.1	770	xanthine dehydrogenase/oxidase	Medtr2g098030.1_xanthine_dehydrogenase/oxidase_HC_chr2:41880188-41892592_20140818
52.1852	3.14655	1.81e-12	1.66e-09	MSTRG.22721.7	673	---NA---	---NA---
43.0091	3.14594	2.68e-07	3.96e-05	MSTRG.38372.2	1237	transmembrane protein, putative	Medtr5g078270.1_hypothetical_protein_HC_chr5:33448201-33449853_20140818
122.223	3.13206	5.82e-11	3.39e-08	190011_t	897	orf187 (mitochondrion)	orf187 (mitochondrion)
29.7888	3.12986	0.000197994	0.00635591	82090_t	414	hypothetical protein L195_g027283, partial	hypothetical protein L195_g027283, partial
266.575	3.12325	3.34e-07	4.7e-05	MSTRG.25625.1	892	NB-ARC domain disease resistance protein	Medtr3g466590.1_hypothetical_protein_LC_chr3:27376193-27381419_20140818
161.96	3.11384	4.32e-15	8.02e-12	MSTRG.42649.1	3424	LRR and NB-ARC domain disease resistance protein	Medtr7g018850.1_LRR_and_NB-ARC_domain_disease_resistance_protein_LC_chr7:6251896-6245587_20140818
349.4	3.11274	2.73e-06	0.000247482	MSTRG.18920.7	1235	NB-ARC domain disease resistance protein	Medtr3g466590.1_hypothetical_protein_LC_chr3:27376193-27381419_20140818
65.5715	3.10417	7.09e-09	2.03e-06	MSTRG.35613.1	1499	isoaspartyl peptidase/L-asparaginase	Medtr4g109900.1_isoaspartyl_peptidase/L-asparaginase_HC_chr4:45733594-45731329_20140818
905.449	3.10002	2.9e-09	9.63e-07	74524_t	843	senescence-associated protein	Medtr0052s0070.1_senescence-associated_protein_HC_scaffold0052:21398-28183_20140818
33.6543	3.09851	3.21e-08	6.82e-06	70790_t	1368	65-kDa microtubule-associated protein 1-like	Medtr5g093860.1_microtubule_associated_protein,_MAP65/ASE1_family_protein_HC_chr5:40981176-40985866_20140818
44.9215	3.08989	1.13e-09	4.28e-07	MSTRG.59326.3	1898	pre-mRNA-splicing factor RSE1-like protein	Medtr7g107350.3_pre-mRNA-splicing_factor_RSE1-like_protein_HC_chr7:43800656-43788689_20140818
81.9653	3.08344	6.61e-11	3.81e-08	MSTRG.55084.2	690	PAIR1, putative	Medtr8g030730.1_PAIR1,_putative_HC_chr8:11395428-11399892_20140818
151.195	3.08272	3.49e-06	0.000299026	MSTRG.51950.2	670	---NA---	---NA---
37.953	3.07313	1.36e-05	0.000859788	MSTRG.42041.1	2467	tRNA-splicing endonuclease subunit Sen54-like isoform X1	Medtr8g090105.1_tRNA-splicing_endonuclease_subunit_sen54_amino-terminal_protein_HC_chr8:37741275-37738113_20140818
20.941	3.06318	0.00119485	0.0227659	79643_t	4167	retrovirus-related Pol polyprotein from transposon TNT 1-94	Medtr3g093120.1_SPFH_domain/band_7_family_protein_LC_chr3:42570339-42574091_20140818
105.416	3.04042	0.00180649	0.0301774	MSTRG.46929.1	1946	transmembrane protein, putative	Medtr5g074630.1_transmembrane_protein,_putative_LC_chr5:31721022-31721687_20140818
35.5459	3.03868	1.02e-05	0.000683631	MSTRG.82604.1	857	---NA---	---NA---
397.886	3.03639	8.34e-08	1.53e-05	35944_t	1698	senescence-associated protein	Medtr0052s0100.1_senescence-associated_protein_HC_scaffold0052:43794-47521_20140818
50.912	3.03478	1.37e-08	3.39e-06	MSTRG.58029.1	7148	receptor-like protein	Medtr6g039180.1_receptor-like_protein_LC_chr6:14113204-14108786_20140818
37.076	3.03376	3.05e-05	0.00160356	MSTRG.76898.4	1264	---NA---	---NA---
74.6627	3.02316	0.00120982	0.0229438	MSTRG.30836.1	297	narbonin-like 2S protein	Medtr0062s0090.1_narbonin-like_2S_protein_LC_scaffold0062:35847-36998_20140818
95.3912	3.01572	3.72e-10	1.66e-07	MSTRG.55084.1	822	PAIR1, putative	Medtr8g030730.1_PAIR1,_putative_HC_chr8:11395428-11399892_20140818
234.513	3.01433	1.25e-06	0.000134335	120238_t	681	hypothetical protein MTR_5g081480	Medtr5g081480.1_hypothetical_protein_LC_chr5:34898739-34895435_20140818
28.9875	3.00802	0.00037161	0.0100192	92800_t	2988	LRR receptor-like kinase	Medtr2g055690.1_LRR_receptor-like_kinase_LC_chr2:23853216-23849866_20140818
394.682	2.99095	1.15e-07	1.99e-05	82201_t	1592	senescence-associated protein	Medtr0052s0100.1_senescence-associated_protein_HC_scaffold0052:43794-47521_20140818
44.6307	2.98069	2.03e-05	0.00116628	MSTRG.80633.2	1040	hypothetical protein MTR_8g096660	Medtr8g096660.1_hypothetical_protein_LC_chr8:40544044-40545603_20140818
31.5367	2.98035	3.04e-07	4.35e-05	MSTRG.40358.1	420	---NA---	---NA---
874.256	2.97655	0.000701271	0.0156997	MSTRG.67662.2	1468	GABA transporter 1-like	Medtr4g055610.1_transmembrane_amino_acid_transporter_family_protein_HC_chr4:20285002-20289374_20140818
59.3454	2.9672	7.92e-09	2.22e-06	MSTRG.85508.6	1402	PPR containing plant protein	Medtr6g024415.1_PPR_containing_plant_protein_LC_chr6:8744390-8743759_20140818
5816.76	2.95807	3.67e-06	0.000311621	MSTRG.13403.1	1215	transmembrane protein, putative	Medtr3g016350.1_transmembrane_protein,_putative_HC_chr3:4878270-4877472_20140818
49.715	2.95365	3.55e-08	7.43e-06	MSTRG.57615.2	465	glutamyl-tRNA synthetase	Medtr8g009900.2_glutamyl-tRNA_synthetase_HC_chr8:2456536-2462483_20140818
40.7104	2.95029	0.000357481	0.00974342	MSTRG.82169.3	1244	NB-ARC domain disease resistance protein	Medtr3g455910.1_disease_resistance_protein_(CC-NBS-LRR_class)_family_protein_LC_chr3:22033804-22037234_20140818
76.1751	2.9466	5.5e-06	0.00042319	MSTRG.15734.2	1261	LysM receptor kinase K1B	Medtr5g086040.3_LysM_receptor_kinase_K1B_HC_chr5:37200474-37204679_20140818
40.2132	2.92632	0.000461658	0.0116769	MSTRG.41852.8	1161	---NA---	---NA---
42.6934	2.92536	2.32e-06	0.000218551	MSTRG.39980.1	376	---NA---	Medtr7g072310.1_ENTH/VHS/GAT_family_protein_HC_chr7:26846469-26852490_20140818
2661.56	2.91798	4.6e-05	0.00217706	30660_t	339	transmembrane protein, putative	Medtr3g016080.1_transmembrane_protein,_putative_LC_chr3:4763213-4761952_20140818
48.586	2.91147	1.02e-09	3.93e-07	116859_t	915	replication factor-A carboxy-terminal domain protein	Medtr4g036240.1_replication_factor-A_carboxy-terminal_domain_protein_HC_chr4:11830210-11833873_20140818
30.4783	2.90811	8.25e-05	0.00334418	135773_t	921	hypothetical protein L195_g027283, partial	hypothetical protein L195_g027283, partial
38.7422	2.90523	7.45e-06	0.000535306	MSTRG.37076.2	1578	---NA---	---NA---
59.1589	2.89129	4.24e-05	0.00204252	MSTRG.41889.1	1806	IMP dehydrogenase/GMP reductase	Medtr7g029440.1_hypothetical_protein_LC_chr7:10516939-10522098_20140818
2723.91	2.89127	5.43e-05	0.00246046	12305_t	339	transmembrane protein, putative	Medtr3g016080.1_transmembrane_protein,_putative_LC_chr3:4763213-4761952_20140818
828.512	2.8795	0.000498128	0.012306	MSTRG.67662.4	1447	GABA transporter 1-like	Medtr4g055610.1_transmembrane_amino_acid_transporter_family_protein_HC_chr4:20285002-20289374_20140818
40.108	2.87915	0.000504825	0.0124101	MSTRG.31700.1	506	transmembrane protein, putative	Medtr2g083950.1_transmembrane_protein,_putative_LC_chr2:35242657-35243825_20140818
158.354	2.86954	8.27e-16	1.88e-12	MSTRG.42920.1	3616	disease resistance protein (TIR-NBS-LRR class)	Medtr1g007300.1_disease_resistance_protein_(TIR-NBS-LRR_class)_LC_chr1:268696-264988_20140818
123.165	2.86513	1.85e-07	2.92e-05	MSTRG.24368.3	1761	60S ribosomal L21-like protein	Medtr4g112035.1_DUF936_family_protein_HC_chr4:46356557-46359609_20140818
51.236	2.86432	2.93e-10	1.36e-07	14709_t	315	hypothetical protein MTR_3g026785	Medtr3g026785.1_hypothetical_protein_HC_chr3:8251194-8250863_20140818
72.3703	2.86408	3.79e-07	5.19e-05	MSTRG.85508.3	1412	PPR containing plant protein	Medtr6g024415.1_PPR_containing_plant_protein_LC_chr6:8744390-8743759_20140818
30.7008	2.86124	1.5e-12	1.41e-09	MSTRG.62389.1	371	---NA---	Medtr0117s0110.1_hypothetical_protein_LC_scaffold0117:42002-41402_20140818
27.5834	2.85217	0.000161853	0.00550649	MSTRG.85223.2	1308	disease resistance protein (TIR-NBS-LRR class), putative	Medtr6g088250.1_disease_resistance_protein_(TIR-NBS-LRR_class),_putative_LC_chr6:33403560-33394883_20140818
69.1348	2.84437	2.24e-07	3.41e-05	MSTRG.51309.2	546	transmembrane protein, putative	Medtr2g026240.1_transmembrane_protein,_putative_LC_chr2:9562121-9560946_20140818
161.504	2.8435	0.00286153	0.0412498	MSTRG.28860.13	651	hypothetical protein MTR_5g073180	Medtr5g073180.1_hypothetical_protein_HC_chr5:31142359-31140039_20140818
32.3302	2.84249	3.99e-06	0.000331322	14455_t	651	ankyrin repeat protein	Medtr7g055630.1_ankyrin_repeat_protein_LC_chr7:19059709-19058453_20140818
29.3974	2.84232	0.000244255	0.00738494	MSTRG.18956.1	452	---NA---	---NA---
126.551	2.84025	0.00307774	0.0432518	MSTRG.87207.7	3456	CC-NBS-LRR resistance protein	Medtr8g028500.1_Rpp4C1_HC_chr8:10848011-10860059_20140818
87.8006	2.8386	0.000285607	0.00827661	88065_t	3627	disease resistance protein (TIR-NBS-LRR class)	Medtr5g071610.1_disease_resistance_protein_(TIR-NBS-LRR_class),_putative_LC_chr5:30414477-30420343_20140818
38.0453	2.82933	9.55e-12	7.01e-09	MSTRG.45568.1	1037	retrotransposon-related protein	retrotransposon-related protein
27.1127	2.82851	6.47e-07	7.99e-05	MSTRG.81905.9	403	structural maintenance-like chromosomes-protein	Medtr3g033470.1_structural_maintenance-like_chromosomes-protein_HC_chr3:10689887-10707051_20140818
42.2026	2.82111	4.41e-05	0.00210476	MSTRG.11236.3	1467	ATP-dependent DNA helicase PIF1	Medtr0048s0090.1_hypothetical_protein_LC_scaffold0048:36104-39426_20140818
55.5686	2.81995	2.1e-07	3.24e-05	MSTRG.63173.15	466	NB-ARC domain disease resistance protein	Medtr3g466590.1_hypothetical_protein_LC_chr3:27376193-27381419_20140818
156.391	2.81966	7.33e-05	0.0030675	MSTRG.28860.2	821	hypothetical protein MTR_5g073180	Medtr5g073180.1_hypothetical_protein_HC_chr5:31142359-31140039_20140818
85.4203	2.81942	0.000975814	0.0198184	MSTRG.77562.2	4168	LRR and NB-ARC domain disease resistance protein	Medtr3g023030.1_LRR_and_NB-ARC_domain_disease_resistance_protein_LC_chr3:6950546-6944739_20140818
37.7037	2.81745	2.82e-05	0.00151107	MSTRG.35744.1	391	hypothetical protein MTR_8g479440	Medtr8g479440.1_hypothetical_protein_LC_chr8:33880932-33879676_20140818
197.613	2.80881	2.91e-06	0.00026004	MSTRG.26197.2	1000	NB-ARC domain disease resistance protein	Medtr3g466590.1_hypothetical_protein_LC_chr3:27376193-27381419_20140818
40.5019	2.79827	0.000151477	0.00523702	MSTRG.85508.12	1416	PPR containing plant protein	Medtr6g024415.1_PPR_containing_plant_protein_LC_chr6:8744390-8743759_20140818
88.9455	2.78813	2.42e-08	5.47e-06	MSTRG.9936.1	1749	GMP synthase [glutamine-hydrolyzing]	Medtr8g098325.1_GMP_synthase_[glutamine-hydrolyzing]_protein_HC_chr8:41021124-41017935_20140818
4929.9	2.7845	4.44e-08	9.02e-06	108322_t	3729	hypothetical protein TanjilG_08066, partial	Medtr0052s0140.1_hypothetical_protein_HC_scaffold0052:65682-64147_20140818
77.9279	2.77634	3.15e-15	6.25e-12	MSTRG.89517.2	205	aspartic protease family protein, putative	Medtr5g080330.1_aspartic_protease_family_protein,_putative_LC_chr5:34380900-34377963_20140818
673.368	2.76615	0.000425735	0.0110442	MSTRG.62571.1	391	transmembrane protein, putative	Medtr5g039960.1_transmembrane_protein,_putative_LC_chr5:17590405-17589548_20140818
191.873	2.76548	1.8e-06	0.000179425	MSTRG.25625.2	1404	NB-ARC domain disease resistance protein	Medtr3g466590.1_hypothetical_protein_LC_chr3:27376193-27381419_20140818
28.1728	2.7629	1.41e-06	0.000147471	MSTRG.40730.1	287	---NA---	---NA---
29.8854	2.7594	0.00266598	0.0392339	7385_t	1257	IMP dehydrogenase/GMP reductase	Medtr7g029440.1_hypothetical_protein_LC_chr7:10516939-10522098_20140818
151.303	2.75506	9.95e-14	1.24e-10	MSTRG.42920.2	3455	disease resistance protein (TIR-NBS-LRR class)	Medtr1g007300.1_disease_resistance_protein_(TIR-NBS-LRR_class)_LC_chr1:268696-264988_20140818
36.674	2.75462	1.14e-05	0.000747866	MSTRG.19044.1	1147	non-structural maintenance of chromosomes element 4 homolog A-like isoform X1	Medtr7g093090.1_Nse4,_component_of_Smc5/6_DNA_repair_complex_protein_HC_chr7:36968665-36972152_20140818
79.5529	2.7529	9.8e-09	2.63e-06	86266_t	2268	disease resistance protein (TIR-NBS-LRR class)	Medtr0019s0100.1_functional_resistance_protein_KR1,_putative_LC_scaffold0019:58637-54816_20140818
47.0312	2.75241	0.000696348	0.0156257	152535_t	2745	DEAD-box ATP-dependent RNA helicase 38	Medtr1g061970.1_DEAD-box_ATP-dependent_RNA_helicase-like_protein_HC_chr1:27069344-27076281_20140818
37.3318	2.75236	3.43e-06	0.000295129	MSTRG.53153.1	401	---NA---	---NA---
59.4143	2.75177	0.002149	0.0338892	MSTRG.89269.1	337	---NA---	---NA---
104.38	2.75142	6.7e-16	1.62e-12	154396_t	2835	disease resistance protein (TIR-NBS-LRR class)	Medtr6g072250.1_disease_resistance_protein_(TIR-NBS-LRR_class)_LC_chr6:26728792-26732864_20140818
40.8694	2.74661	8.23e-09	2.28e-06	MSTRG.78201.1	234	---NA---	---NA---
1726.37	2.74403	2.25e-07	3.42e-05	MSTRG.48795.1	210	hypothetical protein VIGAN_UM134600	Medtr0055s0080.1_transmembrane_protein,_putative_HC_scaffold0055:30838-31389_20140818
110.124	2.74	0.000598967	0.0140086	MSTRG.38506.3	1374	zinc finger BED domain-containing protein RICESLEEPER 2-like	Medtr3g098650.2_glycoside_hydrolase_family_38_amino-terminal_domain_protein_chr3:45068920-45061132_20140818
23.3197	2.73968	5.69e-05	0.00254702	61268_t	3630	receptor-like protein	Medtr6g039180.1_receptor-like_protein_LC_chr6:14113204-14108786_20140818
41.5616	2.73688	9.48e-10	3.67e-07	MSTRG.52033.1	236	---NA---	---NA---
25.1747	2.73457	0.00337359	0.0460109	MSTRG.79765.2	548	---NA---	---NA---
124.444	2.73061	0.00150696	0.026666	MSTRG.59515.2	912	hypothetical protein MTR_5g073180	Medtr5g073180.1_hypothetical_protein_HC_chr5:31142359-31140039_20140818
66.747	2.73016	1.44e-05	0.000900073	MSTRG.20699.4	769	---NA---	---NA---
383.776	2.7292	0.000120883	0.00444092	MSTRG.18920.5	2103	NB-ARC domain disease resistance protein	Medtr3g466590.1_hypothetical_protein_LC_chr3:27376193-27381419_20140818
44.3572	2.72759	0.00118453	0.0226359	MSTRG.64990.1	917	DUF4228 domain protein	Medtr4g068850.1_DUF4228_domain_protein_HC_chr4:25841376-25842009_20140818
108.12	2.72533	9.3e-05	0.00366143	MSTRG.48120.3	1278	cathepsin propeptide inhibitor domain protein	Medtr6g087720.1_cathepsin_propeptide_inhibitor_domain_protein_LC_chr6:33004154-33003216_20140818
345.208	2.72397	5.82e-06	0.000439771	MSTRG.76975.2	1293	hypothetical protein MTR_8g096660	Medtr8g096660.1_hypothetical_protein_LC_chr8:40544044-40545603_20140818
79.699	2.72376	0.00114501	0.0220962	MSTRG.77562.3	4031	LRR and NB-ARC domain disease resistance protein	Medtr3g023030.1_LRR_and_NB-ARC_domain_disease_resistance_protein_LC_chr3:6950546-6944739_20140818
47.724	2.72175	0.000228712	0.00704845	108223_t	3477	verticillium wilt resistance-like protein	Medtr4g019030.1_verticillium_wilt_resistance-like_protein_LC_chr4:5894206-5897214_20140818
94.3997	2.71922	2.25e-06	0.00021377	MSTRG.70831.1	1727	60S ribosomal export protein nmd3-like	Medtr4g107030.1_nonsense-mediated_mRNA_decay_NMD3_family_protein_HC_chr4:43995360-43996798_20140818
381.895	2.70395	1.87e-20	1.31e-16	111634_t	7143	NB-ARC domain disease resistance protein	Medtr3g466620.1_NB-ARC_domain_disease_resistance_protein_LC_chr3:27403732-27400482_20140818
37.2319	2.7026	5.74e-06	0.000435974	MSTRG.75572.1	303	---NA---	---NA---
706.688	2.70231	2.75e-06	0.000248039	MSTRG.48793.1	680	senescence-associated protein	Medtr0052s0140.1_hypothetical_protein_HC_scaffold0052:65682-64147_20140818
43.3245	2.69246	2.17e-06	0.000208654	129769_t	813	unknow protein	Medtr8g040260.1_hypothetical_protein_HC_chr8:15005757-15006760_20140818
63.5099	2.68372	1.56e-09	5.65e-07	MSTRG.63173.16	494	NB-ARC domain disease resistance protein	Medtr3g466610.1_hypothetical_protein_LC_chr3:27392477-27387740_20140818
202.473	2.6827	0.000529008	0.0128173	MSTRG.28860.3	957	hypothetical protein MTR_5g073180	Medtr5g073180.1_hypothetical_protein_HC_chr5:31142359-31140039_20140818
51.8043	2.67359	3.23e-08	6.86e-06	MSTRG.40335.1	743	protein CRABS CLAW-like	Medtr5g046230.1_YABBY-like_transcription_factor_CRABS_CLAW-like_protein_HC_chr5:20267886-20271029_20140818
39.8376	2.67325	0.000229833	0.00707453	129746_t	2235	transmembrane protein, putative	Medtr0242s0030.1_transmembrane_protein,_putative_HC_scaffold0242:9561-11678_20140818
34.4954	2.67244	9.19e-08	1.66e-05	MSTRG.33612.1	1131	TMV resistance protein N-like	Medtr7g090730.1_hypothetical_protein_LC_chr7:35725867-35723628_20140818
63.8106	2.66567	9.03e-07	0.00010454	59047_t	315	hypothetical protein MTR_8g089640	Medtr8g089640.1_hypothetical_protein_HC_chr8:37299351-37297982_20140818
114.16	2.66373	0.000129551	0.00467049	MSTRG.72517.5	605	---NA---	---NA---
102.104	2.66365	1.34e-09	4.97e-07	MSTRG.85508.5	1394	PPR containing plant protein	Medtr6g024415.1_PPR_containing_plant_protein_LC_chr6:8744390-8743759_20140818
112.33	2.66186	0.00378893	0.0497363	MSTRG.29781.1	665	---NA---	---NA---
81.5534	2.65908	2.26e-05	0.00126246	MSTRG.15734.3	1198	LysM receptor kinase K1B	Medtr5g086040.3_LysM_receptor_kinase_K1B_HC_chr5:37200474-37204679_20140818
44.6691	2.64965	0.000880179	0.0184568	43008_t	4020	copia-like polyprotein	Medtr3g093120.1_SPFH_domain/band_7_family_protein_LC_chr3:42570339-42574091_20140818
139.017	2.64846	8.42e-13	8.64e-10	MSTRG.64717.1	257	adenosylhomocysteinase isoform X2	Medtr8g083090.1_S-adenosyl-L-homocysteine_hydrolase_HC_chr8:35157532-35154996_20140818
41.3276	2.6479	4.23e-06	0.000345284	MSTRG.7921.5	308	hypothetical protein MTR_1g084990	Medtr1g084990.1_hypothetical_protein_LC_chr1:37943685-37937964_20140818
95.6191	2.64577	9.61e-06	0.000653851	1975_t	957	nuclear transcription factor Y subunit C-2	Medtr7g113680.1_nuclear_transcription_factor_Y_protein_HC_chr7:46853507-46850661_20140818
59.8409	2.64514	0.000260389	0.00773984	MSTRG.48026.2	1927	Putative AC transposase	Medtr4g120840.1_hypothetical_protein_HC_chr4:50046505-50047138_20140818
106.302	2.64182	2.34e-10	1.15e-07	MSTRG.65412.1	2005	PREDICTED: uncharacterized protein LOC108223098 isoform X6	PREDICTED: uncharacterized protein LOC108223098 isoform X6
79.3807	2.63552	3.05e-05	0.00160293	MSTRG.38506.4	1411	zinc finger BED domain-containing protein RICESLEEPER 2-like	Medtr3g098650.2_glycoside_hydrolase_family_38_amino-terminal_domain_protein_chr3:45068920-45061132_20140818
57.7865	2.63404	5.16e-05	0.00236441	MSTRG.59938.2	1274	ATP-dependent RNA helicase A-like protein	Medtr8g045110.1_ATP-dependent_RNA_helicase_A-like_protein_HC_chr8:17594404-17602720_20140818
55.5389	2.63206	9.87e-09	2.64e-06	MSTRG.9198.11	1269	aldo/keto reductase family oxidoreductase	Medtr4g021450.1_aldo/keto_reductase_family_oxidoreductase_HC_chr4:6976199-6978784_20140818
60.3299	2.63008	4.27e-06	0.000347789	49104_t	1071	Ulp1 protease family, carboxy-terminal domain protein	Medtr7g046380.1_Ulp1_protease_family,_carboxy-terminal_domain_protein_HC_chr7:16432801-16434835_20140818
78.1155	2.62887	4.66e-06	0.000372186	83963_t	1437	60S ribosomal export protein nmd3-like	Medtr4g107030.1_nonsense-mediated_mRNA_decay_NMD3_family_protein_HC_chr4:43995360-43996798_20140818
110.534	2.62633	3.13e-06	0.000274999	MSTRG.48120.2	1314	cathepsin propeptide inhibitor domain protein	Medtr6g087720.1_cathepsin_propeptide_inhibitor_domain_protein_LC_chr6:33004154-33003216_20140818
215.655	2.61392	4.88e-09	1.47e-06	MSTRG.58349.2	604	hypothetical protein MTR_6g090460	Medtr6g090460.1_hypothetical_protein_HC_chr6:34039171-34037721_20140818
37.6121	2.61033	2.05e-05	0.00117615	MSTRG.8885.1	828	hypothetical protein MTR_8g479440	Medtr8g479440.1_hypothetical_protein_LC_chr8:33880932-33879676_20140818
36.2789	2.60775	6.61e-06	0.000487122	MSTRG.35619.1	4179	receptor-like protein	Medtr6g039180.1_receptor-like_protein_LC_chr6:14113204-14108786_20140818
57.3874	2.60699	6.37e-06	0.000473449	122827_t	1224	unknow protein	Medtr4g006040.1_ycf68_protein_HC_chr4:489841-491171_20140818
58.8879	2.60573	0.000568899	0.0135117	MSTRG.13804.1	1467	replication factor-A carboxy-terminal domain protein	Medtr7g110100.1_replication_factor-A_carboxy-terminal_domain_protein_HC_chr7:45127464-45130150_20140818
154.515	2.5885	7.81e-05	0.00321463	MSTRG.41280.1	913	---NA---	---NA---
180.584	2.57975	0.00177042	0.0297803	118679_t	1560	NB-ARC domain disease resistance protein	Medtr3g466590.1_hypothetical_protein_LC_chr3:27376193-27381419_20140818
60.3007	2.57891	8.53e-07	0.000100301	MSTRG.52085.2	609	aluminum activated malate transporter family protein	Medtr1g115190.1_aluminum_activated_malate_transporter_family_protein_HC_chr1:51860317-51863568_20140818
86.8876	2.57537	2.26e-05	0.00126336	MSTRG.24590.2	2171	NADPH-cytochrome P450 family 2 reductase	Medtr4g128020.1_NADPH-cytochrome_P450_family_2_reductase_HC_chr4:53277472-53283179_20140818
56.9486	2.57253	7.22e-10	2.9e-07	MSTRG.54924.5	1418	---NA---	---NA---
47.1379	2.56958	1.65e-07	2.64e-05	MSTRG.3178.1	1567	receptor-like kinase	Medtr1g027040.1_receptor-like_kinase_LC_chr1:8925788-8927830_20140818
68.963	2.56744	0.000267189	0.00788296	167530_t	3783	LRR and NB-ARC domain disease resistance protein	Medtr3g023030.1_LRR_and_NB-ARC_domain_disease_resistance_protein_LC_chr3:6950546-6944739_20140818
185.582	2.56694	0.000453395	0.0115376	MSTRG.54334.4	2084	O-fucosyltransferase family protein	Medtr5g042200.1_O-fucosyltransferase_family_protein_HC_chr5:18563089-18558307_20140818
45.6343	2.56347	0.00080448	0.017245	MSTRG.87588.1	1550	transmembrane protein, putative	Medtr5g080330.1_aspartic_protease_family_protein,_putative_LC_chr5:34380900-34377963_20140818
75.7506	2.56326	1.03e-09	3.94e-07	MSTRG.83460.2	2816	Retrovirus-related Pol polyprotein from transposon TNT 1-94	Medtr3g079700.1_double-stranded_RNA-binding_motif_protein_LC_chr3:35967574-35973361_20140818
34.5698	2.56228	0.0012994	0.0240535	107130_t	5493	PREDICTED: uncharacterized protein LOC104894399	Medtr8g463500.1_hypothetical_protein_LC_chr8:22359101-22360522_20140818
111.878	2.55708	0.00101532	0.0203382	MSTRG.30761.7	1647	calcium-dependent protein kinase 20-like	Medtr1g054865.1_calmodulin-domain_kinase_CDPK_protein_HC_chr1:24041840-24046332_20140818
32.2385	2.5558	0.000992595	0.0200462	MSTRG.16942.1	734	---NA---	---NA---
53.8593	2.55059	4.54e-05	0.00215369	MSTRG.65053.3	1248	NAD(P)H-dependent 6'-deoxychalcone synthase-like	Medtr3g083130.1_aldo/keto_reductase_family_oxidoreductase_HC_chr3:37505830-37503715_20140818
75.3252	2.54745	0.00219377	0.0344144	155795_t	834	hypothetical protein MTR_4g091710	Medtr4g091710.1_hypothetical_protein_LC_chr4:36378847-36379428_20140818
312.312	2.54544	9.58e-07	0.000109469	MSTRG.80450.5	931	transmembrane protein, putative	Medtr4g050830.1_transmembrane_protein,_putative_HC_chr4:18049440-18049784_20140818
46.6114	2.54305	4.65e-07	6.13e-05	MSTRG.11088.1	3038	NBS-LRR disease resistance protein	Medtr7g091140.1_LRR_and_NB-ARC_domain_disease_resistance_protein_LC_chr7:35958946-35950571_20140818
84.1778	2.53708	9.24e-06	0.00063249	MSTRG.23765.1	2214	DnaJ-class molecular chaperone	Medtr5g048560.1_transmembrane_protein,_putative_LC_chr5:21253619-21256479_20140818
85.5292	2.53705	3.18e-06	0.000277938	MSTRG.89486.3	452	hypothetical protein L195_g027283, partial	hypothetical protein L195_g027283, partial
42.5127	2.53673	6.01e-05	0.00264948	17663_t	636	EMG1/NEP1 methyltransferase	Medtr5g464770.1_EMG1/NEP1_methyltransferase_HC_chr5:26915643-26913445_20140818
320.668	2.53611	2.17e-11	1.47e-08	MSTRG.37596.34	1094	subtilisin-like serine protease	Medtr7g081580.1_subtilisin-like_serine_protease_HC_chr7:31150515-31143203_20140818
63.4971	2.53611	3.48e-05	0.00177257	MSTRG.49573.1	263	---NA---	---NA---
60.0103	2.53464	8.91e-10	3.47e-07	MSTRG.44802.7	409	TPX2 (targeting protein for Xklp2) family protein	Medtr1g075310.1_TPX2_(targeting_protein_for_Xklp2)_family_protein_HC_chr1:33342141-33338595_20140818
113.934	2.53364	0.000240344	0.00729945	MSTRG.48120.1	1433	cathepsin propeptide inhibitor domain protein	Medtr6g087720.1_cathepsin_propeptide_inhibitor_domain_protein_LC_chr6:33004154-33003216_20140818
62.6341	2.53207	1.82e-05	0.00108092	MSTRG.20699.7	877	YaeB/AF-0241 family methyltransferase, putative	Medtr4g129150.1_YaeB/AF-0241_family_methyltransferase,_putative_HC_chr4:53769515-53765085_20140818
38.4042	2.52368	1.08e-06	0.000119659	MSTRG.31192.1	812	transmembrane protein, putative	Medtr5g080330.1_aspartic_protease_family_protein,_putative_LC_chr5:34380900-34377963_20140818
146.524	2.52294	2.85e-07	4.12e-05	MSTRG.24368.2	1803	60S ribosomal L21-like protein	Medtr4g112035.1_DUF936_family_protein_HC_chr4:46356557-46359609_20140818
40.2506	2.51613	2.56e-05	0.00139644	MSTRG.74543.2	806	---NA---	---NA---
58.6432	2.51558	0.000256319	0.00764966	MSTRG.13386.1	453	transmembrane protein, putative	Medtr7g094300.1_transmembrane_protein,_putative_LC_chr7:37533000-37533575_20140818
60.1487	2.51371	5.34e-05	0.00243129	135964_t	2697	NB-ARC domain disease resistance protein	Medtr3g055720.1_NB-ARC_domain_disease_resistance_protein_LC_chr3:21936546-21940798_20140818
385.439	2.51264	0.000175864	0.0058391	MSTRG.89490.1	467	thaumatin-like pathogenesis-related protein 4-like precursor	Medtr8g096920.1_pathogenesis-related_thaumatin_family_protein_HC_chr8:40682449-40681554_20140818
132.542	2.51199	0.000894395	0.0186539	MSTRG.44717.4	933	---NA---	---NA---
364.642	2.5107	1.03e-19	6.38e-16	141367_t	6168	NB-ARC domain disease resistance protein	Medtr3g466620.1_NB-ARC_domain_disease_resistance_protein_LC_chr3:27403732-27400482_20140818
76.9769	2.50912	0.0027113	0.0397239	178721_t	1173	ribonuclease H	Medtr4g035750.1_hypothetical_protein_LC_chr4:12400549-12399782_20140818
43.4583	2.50569	0.00110248	0.021541	MSTRG.51756.1	265	---NA---	---NA---
59.4696	2.50508	2.02e-08	4.67e-06	MSTRG.22721.5	777	---NA---	---NA---
219.556	2.498	1.65e-09	5.91e-07	41817_t	2064	taxadiene 5-alpha hydroxylase	Medtr5g091760.1_cytochrome_P450_family_protein_HC_chr5:40043223-40041438_20140818
57.9884	2.49229	3.31e-05	0.00170586	MSTRG.65053.2	1457	NAD(P)H-dependent 6'-deoxychalcone synthase-like	Medtr3g083130.1_aldo/keto_reductase_family_oxidoreductase_HC_chr3:37505830-37503715_20140818
42.9391	2.49221	0.000329135	0.00917256	152843_t	3369	Cytochrome cd1-nitrite reductase-like, C-terminal haem d1	Medtr1g018830.1_hypothetical_protein_HC_chr1:5545314-5542120_20140818
83.9912	2.49165	1.74e-05	0.00104638	MSTRG.20699.5	956	---NA---	---NA---
93.6453	2.48809	7.17e-06	0.000520171	MSTRG.89486.2	862	hypothetical protein L195_g027283, partial	hypothetical protein L195_g027283, partial
35.3369	2.48386	0.00184087	0.0305442	MSTRG.12913.1	508	transmembrane protein, putative	Medtr3g453190.1_transmembrane_protein,_putative_LC_chr3:20333070-20328554_20140818
170.735	2.47977	6e-05	0.00264636	MSTRG.76854.2	815	transmembrane protein, putative	Medtr5g068680.1_transmembrane_protein,_putative_LC_chr5:29087094-29087516_20140818
257.373	2.47974	0.00114233	0.0220662	MSTRG.27565.1	1570	probable CDP-diacylglycerol--inositol 3-phosphatidyltransferase 2	Medtr4g073020.1_CDP-diacylglycerol-inositol_3-phosphatidyltransferase_HC_chr4:27623894-27619241_20140818
36.2901	2.477	2.61e-05	0.00142012	122869_t	579	replication factor-A carboxy-terminal domain protein	Medtr1g492690.1_hypothetical_protein_HC_chr1:41541171-41539306_20140818
38.105	2.47656	2.6e-06	0.000238007	MSTRG.54924.6	876	---NA---	---NA---
52.7065	2.47618	5.37e-05	0.00243986	MSTRG.73013.1	893	---NA---	---NA---
118.619	2.47068	0.00267171	0.0392925	MSTRG.84591.2	1541	NAD(P)H-dependent 6'-deoxychalcone synthase-like	Medtr3g083130.1_aldo/keto_reductase_family_oxidoreductase_HC_chr3:37505830-37503715_20140818
232.36	2.46917	2.31e-11	1.54e-08	153792_t	1032	transmembrane protein, putative	Medtr8g096660.1_hypothetical_protein_LC_chr8:40544044-40545603_20140818
45.9828	2.46805	4.76e-06	0.000378311	MSTRG.71975.3	840	P-loop nucleoside triphosphate hydrolase superfamily protein	Medtr8g098230.1_P-loop_nucleoside_triphosphate_hydrolase_superfamily_protein_HC_chr8:40988299-40979942_20140818
101.608	2.46794	1.18e-18	5.73e-15	MSTRG.85366.1	279	50S ribosomal protein l4-like	Medtr5g089380.1_hypothetical_protein_LC_chr5:38848771-38849072_20140818
63.3831	2.46612	3.7e-06	0.000313213	2118_t	351	hypothetical protein MTR_8g089640	Medtr8g089640.1_hypothetical_protein_HC_chr8:37299351-37297982_20140818
93.038	2.46341	5.28e-08	1.04e-05	MSTRG.23863.1	707	hypothetical protein TSUD_220720	Medtr7g033950.1_hypothetical_protein_HC_chr7:12510835-12509838_20140818
30.6774	2.45525	0.000298578	0.008547	MSTRG.63965.11	1470	hypothetical protein MTR_4g039945	Medtr5g010555.1_hypothetical_protein_HC_chr5:2852736-2852280_20140818
33.0723	2.45372	8.38e-07	9.88e-05	151593_t	1638	B3 DNA-binding domain protein	Medtr5g071410.1_hypothetical_protein_LC_chr5:30312185-30310238_20140818
123.228	2.45207	2.18e-07	3.33e-05	MSTRG.5735.3	995	glutamyl-tRNA synthetase	Medtr8g009900.1_glutamyl-tRNA_synthetase_HC_chr8:2456519-2462483_20140818
159.187	2.45134	0.000242378	0.00733965	MSTRG.77539.2	387	---NA---	---NA---
96.6865	2.44922	4.86e-09	1.46e-06	MSTRG.2035.1	2725	disease resistance protein (TIR-NBS-LRR class)	Medtr6g075970.2_disease_resistance_protein_(TIR-NBS-LRR_class)_LC_chr6:28242590-28247236_20140818
89.8903	2.44779	7.55e-10	2.99e-07	MSTRG.29560.3	1341	glutamyl-tRNA synthetase	Medtr5g093860.1_microtubule_associated_protein,_MAP65/ASE1_family_protein_HC_chr5:40981176-40985866_20140818
292.136	2.44676	4e-05	0.00196492	MSTRG.81890.8	1645	Regulator of rDNA transcription protein 15	Medtr0055s0110.1_senescence-associated_protein_HC_scaffold0055:58201-61046_20140818
55.9011	2.43888	0.00103552	0.0206331	MSTRG.18346.2	728	F-box/LRR protein, putative	Medtr5g430490.1_F-box/LRR_protein,_putative_LC_chr5:12847111-12845351_20140818
53.6607	2.43613	7.15e-05	0.00301398	MSTRG.9908.1	1050	protein CRABS CLAW-like	Medtr5g046230.1_YABBY-like_transcription_factor_CRABS_CLAW-like_protein_HC_chr5:20267886-20271029_20140818
96.1732	2.43524	1.26e-05	0.000812391	MSTRG.82025.1	1368	PREDICTED: uncharacterized protein LOC108830220	Medtr7g062720.1_Copia-like_polyprotein/retrotransposon,_putative_LC_chr7:22824311-22825240_20140818
98.5975	2.4339	5.63e-06	0.000428816	MSTRG.82392.1	661	hypothetical protein L195_g027283, partial	hypothetical protein L195_g027283, partial
100.992	2.43065	2.72e-08	6.01e-06	MSTRG.76815.5	1508	ADP-ribosylation factor-related protein 1	Medtr2g022200.1_ADP-ribosylation_factor-like_protein_A1D_HC_chr2:7631017-7626899_20140818
29.6314	2.43028	0.00257531	0.038337	27857_t	3468	disease resistance protein (CC-NBS-LRR class) family protein	Medtr3g027420.1_NBS-LRR_type_disease_resistance_protein_LC_chr3:8567848-8571959_20140818
223.32	2.42946	1.48e-05	0.000918636	MSTRG.35600.3	746	transmembrane protein, putative	Medtr3g015420.1_transmembrane_protein,_putative_HC_chr3:4461069-4459937_20140818
43.4249	2.42517	8.69e-07	0.000101616	MSTRG.83301.3	847	heavy metal-associated domain protein	Medtr6g051690.1_heavy_metal-associated_domain_protein_HC_chr6:17999677-18000937_20140818
40.5037	2.42499	4.27e-06	0.000347789	MSTRG.59326.12	2090	pre-mRNA-splicing factor RSE1-like protein	Medtr7g107350.1_pre-mRNA-splicing_factor_RSE1-like_protein_HC_chr7:43803096-43788689_20140818
36.4442	2.42478	0.00126792	0.0236605	74701_t	2619	receptor-like protein 12	Medtr6g038980.1_receptor-like_protein,_putative_LC_chr6:14049539-14046522_20140818
72.6383	2.42463	4.58e-10	1.98e-07	MSTRG.62897.1	1476	probable methyltransferase PMT13	Medtr7g076150.2_methyltransferase_PMT16,_putative_HC_chr7:28629548-28623929_20140818
48.7023	2.42457	0.00137978	0.0250655	MSTRG.9198.16	776	aldo/keto reductase family oxidoreductase	Medtr4g021450.2_aldo/keto_reductase_family_oxidoreductase_HC_chr4:6976199-6978784_20140818
28.9749	2.42417	4.22e-05	0.00203752	MSTRG.6968.1	448	---NA---	---NA---
108.329	2.42204	5.13e-06	0.000401714	59349_t	369	transmembrane protein, putative	Medtr4g021725.1_metallothionein_HC_chr4:7155063-7153291_20140818
136.261	2.42077	0.000522606	0.0127221	91601_t	384	transmembrane protein, putative	Medtr4g082355.1_transmembrane_protein,_putative_LC_chr4:32079611-32080820_20140818
91.4889	2.41872	4.17e-11	2.52e-08	MSTRG.42591.1	287	21 kDa protein-like	Medtr4g120825.1_plant_invertase/pectin_methylesterase_inhibitor_HC_chr4:50037482-50036249_20140818
92.9205	2.41837	9.37e-05	0.0036844	MSTRG.20699.2	1273	YaeB/AF-0241 family methyltransferase, putative	Medtr4g129150.1_YaeB/AF-0241_family_methyltransferase,_putative_HC_chr4:53769515-53765085_20140818
45.6313	2.41679	2.82e-07	4.09e-05	106457_t	1317	PREDICTED: uncharacterized protein LOC108223098 isoform X6	PREDICTED: uncharacterized protein LOC108223098 isoform X6
43.2192	2.41613	0.000678578	0.0153425	189483_t	774	hypothetical protein MTR_5g073090	Medtr5g073090.1_hypothetical_protein_HC_chr5:31099060-31100828_20140818
191.24	2.40298	0.00104933	0.0208069	MSTRG.72562.4	2580	glycoside hydrolase family 1 protein	Medtr4g081530.1_glycoside_hydrolase_family_1_protein_HC_chr4:31637194-31641130_20140818
57.6889	2.40263	7.27e-07	8.78e-05	MSTRG.75555.4	258	---NA---	---NA---
52.2815	2.40255	0.000227724	0.00702639	167544_t	3774	disease resistance protein (CC-NBS-LRR class) family protein	Medtr3g027420.1_NBS-LRR_type_disease_resistance_protein_LC_chr3:8567848-8571959_20140818
103.062	2.40152	0.00364042	0.0483606	MSTRG.84591.1	1509	NAD(P)H-dependent 6'-deoxychalcone synthase-like	Medtr3g083130.1_aldo/keto_reductase_family_oxidoreductase_HC_chr3:37505830-37503715_20140818
36.9691	2.39862	0.00291627	0.041729	175400_t	600	hypothetical protein MTR_1g036730	Medtr1g036730.1_hypothetical_protein_LC_chr1:13493699-13494301_20140818
203.253	2.39805	7.6e-15	1.25e-11	MSTRG.63173.13	3798	NB-ARC domain disease resistance protein	Medtr3g466620.1_NB-ARC_domain_disease_resistance_protein_LC_chr3:27403732-27400482_20140818
30.1981	2.39523	0.00105636	0.0209035	MSTRG.49655.6	668	digestive organ expansion factor-like protein	Medtr3g083030.1_hypothetical_protein_HC_chr3:37472887-37474166_20140818
389.405	2.39134	0.00148624	0.026417	MSTRG.2625.1	868	transmembrane protein, putative	Medtr7g068350.1_transmembrane_protein,_putative_LC_chr7:25002434-25001592_20140818
146.497	2.38901	0.000428519	0.0110997	MSTRG.41280.2	973	---NA---	---NA---
62.7957	2.38589	1.71e-08	4.08e-06	MSTRG.83961.7	780	UDP-glucosyltransferase family protein	Medtr5g072820.1_UDP-glucosyltransferase_family_protein_HC_chr5:30989979-30993244_20140818
973.992	2.38397	1.22e-07	2.08e-05	MSTRG.70660.1	1092	transmembrane protein, putative	Medtr8g096660.1_hypothetical_protein_LC_chr8:40544044-40545603_20140818
33.6741	2.38276	3.34e-06	0.000288867	MSTRG.27216.1	640	---NA---	Medtr0138s0070.1_hypothetical_protein_LC_scaffold0138:26382-27283_20140818
54.784	2.37671	5.81e-05	0.00258841	95523_t	849	UTP-glucose-1-phosphate uridylyltransferase	Medtr3g088650.1_UTP-glucose-1-phosphate_uridylyltransferase_HC_chr3:40382946-40391125_20140818
904.22	2.37586	6.64e-12	5.17e-09	MSTRG.75541.1	1206	PsaB RNA-binding protein	Medtr3g030950.1_PsaB_RNA-binding_protein_HC_chr3:9831792-9837160_20140818
47.961	2.37472	1.15e-05	0.000749553	MSTRG.44717.3	936	---NA---	---NA---
87.466	2.37408	2.16e-06	0.000207942	MSTRG.38506.8	1063	zinc finger BED domain-containing protein RICESLEEPER 2-like	Medtr3g098650.2_glycoside_hydrolase_family_38_amino-terminal_domain_protein_chr3:45068920-45061132_20140818
211.553	2.37341	0.000691807	0.0155553	MSTRG.72562.5	2521	glycoside hydrolase family 1 protein	Medtr4g081530.1_glycoside_hydrolase_family_1_protein_HC_chr4:31637194-31641130_20140818
77.266	2.37141	9.17e-07	0.00010574	MSTRG.9198.1	901	aldo/keto reductase family oxidoreductase	Medtr4g021450.1_aldo/keto_reductase_family_oxidoreductase_HC_chr4:6976199-6978784_20140818
59.5231	2.36817	9.83e-08	1.75e-05	MSTRG.85508.7	1248	PPR containing plant protein	Medtr6g024415.1_PPR_containing_plant_protein_LC_chr6:8744390-8743759_20140818
50.2062	2.3676	4.34e-06	0.000351583	MSTRG.19044.2	1278	non-structural maintenance of chromosomes element 4 homolog A-like isoform X1	Medtr7g093090.1_Nse4,_component_of_Smc5/6_DNA_repair_complex_protein_HC_chr7:36968665-36972152_20140818
232.369	2.36749	0.00118579	0.0226545	MSTRG.72562.6	2429	glycoside hydrolase family 1 protein	Medtr4g081530.1_glycoside_hydrolase_family_1_protein_HC_chr4:31637194-31641130_20140818
60.9375	2.36706	5.57e-06	0.000426301	144906_t	7737	Retrovirus-related Pol polyprotein from transposon TNT 1-94	Medtr1g075310.1_TPX2_(targeting_protein_for_Xklp2)_family_protein_HC_chr1:33342141-33338595_20140818
30.4353	2.36698	3.71e-05	0.00186216	MSTRG.11806.1	477	---NA---	---NA---
168.304	2.36478	3.07e-11	1.96e-08	MSTRG.64717.2	262	S-adenosyl-l-homocysteine hydrolase	Medtr8g083090.1_S-adenosyl-L-homocysteine_hydrolase_HC_chr8:35157532-35154996_20140818
43.7632	2.36457	3.48e-05	0.00177177	MSTRG.71975.1	2422	P-loop nucleoside triphosphate hydrolase superfamily protein	Medtr8g098230.1_P-loop_nucleoside_triphosphate_hydrolase_superfamily_protein_HC_chr8:40988299-40979942_20140818
45.6536	2.36377	0.000691578	0.0155524	MSTRG.64107.4	1290	hypothetical protein MTR_3g117530	Medtr3g117530.2_hypothetical_protein_HC_chr3:55027750-55029166_20140818
72.0788	2.36352	2.24e-06	0.000212962	MSTRG.68321.1	301	---NA---	---NA---
52.5108	2.36242	1.88e-05	0.00110192	64684_t	1005	choline-phosphate cytidylyltransferase 2	Medtr3g081530.1_choline-phosphate_cytidylyltransferase_HC_chr3:36916465-36912358_20140818
86.4932	2.36016	4.77e-07	6.27e-05	74586_t	1683	serine/threonine-protein phosphatase 7 long form homolog	Medtr3g011100.1_F-box_and_associated_interaction_domain_protein_HC_chr3:2698683-2696484_20140818
44.6183	2.35689	6.94e-08	1.31e-05	160843_t	1995	DEAD-box ATP-dependent RNA helicase-like protein	Medtr7g076820.1_DEAD-box_ATP-dependent_RNA_helicase-like_protein_HC_chr7:28990557-28982494_20140818
99.4057	2.34931	5.75e-05	0.0025669	MSTRG.20699.3	1223	YaeB/AF-0241 family methyltransferase, putative	Medtr4g129150.1_YaeB/AF-0241_family_methyltransferase,_putative_HC_chr4:53769515-53765085_20140818
49.5552	2.34879	0.000431452	0.0111458	MSTRG.41271.2	1398	replication factor-A carboxy-terminal domain protein	Medtr3g056240.1_DUF223_domain_protein_HC_chr3:22396065-22393475_20140818
67.9946	2.34593	4.01e-05	0.00196543	MSTRG.82169.4	3108	NB-ARC domain disease resistance protein	Medtr3g055720.1_NB-ARC_domain_disease_resistance_protein_LC_chr3:21936546-21940798_20140818
49.9671	2.34138	0.00140188	0.0253612	MSTRG.69194.2	1647	E3 ubiquitin-protein ligase ATL4-like	Medtr8g009190.1_RING_zinc_finger_protein,_putative_HC_chr8:2065221-2064020_20140818
83.2696	2.3401	3.34e-05	0.00171981	MSTRG.13972.3	2588	sesquiterpene synthase	Medtr4g048460.1_sesquiterpene_synthase_LC_chr4:17178708-17183882_20140818
59.0238	2.33963	2.73e-08	6.01e-06	MSTRG.85233.5	1282	---NA---	---NA---
57.079	2.33703	4.85e-08	9.71e-06	MSTRG.54924.3	1159	---NA---	---NA---
122.86	2.33016	6.62e-07	8.15e-05	MSTRG.58484.1	2080	serine/threonine-protein phosphatase 7 long form homolog	Medtr3g011100.1_F-box_and_associated_interaction_domain_protein_HC_chr3:2698683-2696484_20140818
54.4846	2.32768	2.2e-05	0.00123697	MSTRG.17239.5	2372	Dil domain myosin family protein	Medtr1g080600.1_Dil_domain_myosin_family_protein_HC_chr1:35834916-35819927_20140818
74.0008	2.32487	5.37e-08	1.06e-05	MSTRG.85508.4	1287	PPR containing plant protein	Medtr6g024415.1_PPR_containing_plant_protein_LC_chr6:8744390-8743759_20140818
36.5538	2.3236	0.000310668	0.00880521	MSTRG.40359.1	440	---NA---	---NA---
93.9917	2.32114	1.35e-08	3.35e-06	MSTRG.59343.14	1141	NAD(P)H-dependent 6'-deoxychalcone synthase-like	Medtr3g083130.1_aldo/keto_reductase_family_oxidoreductase_HC_chr3:37505830-37503715_20140818
31.7631	2.31979	1.58e-07	2.57e-05	30070_t	5541	PREDICTED: uncharacterized protein LOC104894399	Medtr8g463500.1_hypothetical_protein_LC_chr8:22359101-22360522_20140818
62.112	2.31937	0.000454362	0.011547	MSTRG.15734.4	1078	LysM receptor kinase K1B	Medtr5g086040.3_LysM_receptor_kinase_K1B_HC_chr5:37200474-37204679_20140818
41.9849	2.31841	8.2e-05	0.00333303	MSTRG.82966.1	522	transmembrane protein, putative	Medtr3g453190.1_transmembrane_protein,_putative_LC_chr3:20333070-20328554_20140818
45.5856	2.31546	6.25e-07	7.77e-05	9363_t	1314	replication factor-A carboxy-terminal domain protein	Medtr7g110100.1_replication_factor-A_carboxy-terminal_domain_protein_HC_chr7:45127464-45130150_20140818
36.2143	2.31517	0.000266951	0.00787915	MSTRG.87460.1	546	transmembrane protein, putative	Medtr5g080330.1_aspartic_protease_family_protein,_putative_LC_chr5:34380900-34377963_20140818
346.723	2.31501	9.25e-16	2.08e-12	89076_t	6816	NB-ARC domain disease resistance protein	Medtr3g062090.1_NB-ARC_domain_disease_resistance_protein_LC_chr3:27987790-28006982_20140818
89.6264	2.31374	2.79e-07	4.05e-05	MSTRG.70166.1	1279	calcineurin B-like protein 4-1	Medtr8g099575.1_calcineurin_B-like_protein_4-1_HC_chr8:42073701-42069913_20140818
234.426	2.31262	3.87e-17	1.33e-13	MSTRG.63173.12	3854	NB-ARC domain disease resistance protein	Medtr3g466620.1_NB-ARC_domain_disease_resistance_protein_LC_chr3:27403732-27400482_20140818
80.6611	2.30982	5.36e-05	0.00243503	MSTRG.49545.1	5128	ribonuclease H	Medtr3g056585.1_LRR_and_NB-ARC_domain_disease_resistance_protein_LC_chr3:22616366-22612832_20140818
43.7282	2.30939	0.00247145	0.0373216	MSTRG.2242.2	587	myb-like transcription factor family protein	Medtr4g086835.1_myb-like_transcription_factor_family_protein_HC_chr4:34055698-34052328_20140818
41.6403	2.30819	2.25e-05	0.00125879	34376_t	447	RNA-binding (RRM/RBD/RNP motif) family protein	Medtr7g013730.1_RNA-binding_(RRM/RBD/RNP_motif)_family_protein_HC_chr7:3986546-3983001_20140818
6850.59	2.30816	0.00218543	0.0343309	MSTRG.9889.5	1340	predicted protein	predicted protein
248.161	2.30761	3.12e-09	1.02e-06	MSTRG.32847.1	1494	cysteine synthase-like isoform X1	Medtr1g081620.1_O-acetylserine_(thiol)_lyase_HC_chr1:36280172-36284490_20140818
112.783	2.30593	0.00346701	0.0468201	MSTRG.27641.2	1523	peroxidase family protein	Medtr2g028980.1_peroxidase_family_protein_HC_chr2:10794705-10792786_20140818
82.0084	2.30427	5.01e-06	0.000394043	MSTRG.73146.4	884	glutamyl-tRNA synthetase	Medtr8g009900.1_glutamyl-tRNA_synthetase_HC_chr8:2456519-2462483_20140818
281.391	2.30364	1.26e-08	3.18e-06	MSTRG.52933.5	1859	glycoside hydrolase family 79 amino-terminal domain protein	Medtr4g109300.1_glycoside_hydrolase_family_79_amino-terminal_domain_protein_HC_chr4:45387586-45390508_20140818
251.951	2.3014	0.000116599	0.0043192	MSTRG.35600.5	819	transmembrane protein, putative	Medtr3g015420.1_transmembrane_protein,_putative_HC_chr3:4461069-4459937_20140818
83.6279	2.30127	1.27e-07	2.14e-05	62697_t	414	---NA---	---NA---
181.173	2.30037	1.72e-07	2.75e-05	MSTRG.32847.3	1426	cysteine synthase isoform X1	Medtr1g081620.1_O-acetylserine_(thiol)_lyase_HC_chr1:36280172-36284490_20140818
66.7812	2.30009	1.98e-05	0.00114497	MSTRG.41822.1	263	---NA---	---NA---
143.664	2.29973	0.000649833	0.0148727	MSTRG.2507.1	1327	nuclear transcription factor Y subunit C-2	Medtr7g113680.1_nuclear_transcription_factor_Y_protein_HC_chr7:46853507-46850661_20140818
41.3654	2.29854	6.71e-05	0.00287837	MSTRG.54924.4	932	---NA---	---NA---
75.8061	2.29841	4.5e-05	0.00213882	131400_t	5025	ribonuclease H	Medtr3g056585.1_LRR_and_NB-ARC_domain_disease_resistance_protein_LC_chr3:22616366-22612832_20140818
51.984	2.29644	1.01e-05	0.000680189	MSTRG.27521.13	1717	65-kDa microtubule-associated protein 1	Medtr5g093860.1_microtubule_associated_protein,_MAP65/ASE1_family_protein_HC_chr5:40981176-40985866_20140818
1722.52	2.29401	7.27e-05	0.00304837	MSTRG.81890.3	1730	Regulator of rDNA transcription protein 15	Medtr0052s0130.1_senescence-associated_protein_HC_scaffold0052:58473-60984_20140818
135.476	2.28749	0.00042058	0.0109662	MSTRG.72517.3	1056	---NA---	---NA---
94.5766	2.28684	3.88e-08	7.98e-06	MSTRG.5933.3	964	protein FRA10AC1	Medtr8g037265.1_folate-sensitive_fragile_site_protein_FRA10AC1_HC_chr8:13834849-13841481_20140818
140.526	2.28651	2.06e-13	2.42e-10	28199_t	3453	lysine--tRNA ligase-like	Medtr4g127770.1_lysine-tRNA_ligase-like_protein_LC_chr4:53118581-53107577_20140818
48.3482	2.2837	1.98e-06	0.000193708	182636_t	363	ATP-dependent Clp protease adaptor protein ClpS	Medtr5g054770.1_ATP-dependent_Clp_protease_adaptor_protein_ClpS_HC_chr5:22566023-22570033_20140818
48.383	2.28276	4.08e-05	0.00198964	30366_t	306	protein PLANT CADMIUM RESISTANCE 2-like	Medtr8g104890.1_plant_cadmium_resistance_protein_HC_chr8:44221070-44222607_20140818
154.416	2.28196	0.00124665	0.0233702	55857_t	1056	universal stress protein A-like protein	Medtr1g087200.1_universal_stress_family_protein_HC_chr1:39067837-39069242_20140818
42.2844	2.27956	7.8e-05	0.00320934	191780_t	360	60S ribosomal protein L7	Medtr2g038250.1_60S_ribosomal_protein_L7_HC_chr2:16653396-16650568_20140818
131.522	2.2788	1.24e-05	0.00079924	MSTRG.76815.1	1834	ADP-ribosylation factor-related protein 1-like	Medtr2g022200.1_ADP-ribosylation_factor-like_protein_A1D_HC_chr2:7631017-7626899_20140818
36.5558	2.27724	0.00298408	0.0423569	MSTRG.16647.5	674	Clathrin heavy chain 2	Medtr3g070940.1_clathrin_heavy_chain_HC_chr3:31838485-31851792_20140818
39.2401	2.2719	4.17e-05	0.00201943	MSTRG.41314.1	680	animal RPA1 domain protein	Medtr6g465570.1_animal_RPA1_domain_protein_LC_chr6:23330063-23328693_20140818
55.1897	2.2708	1.8e-05	0.00106748	MSTRG.4234.4	1075	proton pump interactor, putative	Medtr2g090520.3_proton_pump_interactor,_putative_HC_chr2:38632503-38635088_20140818
112.068	2.26971	1.32e-07	2.21e-05	84836_t	756	isoaspartyl peptidase/L-asparaginase	Medtr4g109900.1_isoaspartyl_peptidase/L-asparaginase_HC_chr4:45733594-45731329_20140818
207.733	2.26946	5.9e-10	2.42e-07	MSTRG.27521.12	1015	65-kda microtubule-associated protein 1	Medtr5g093860.1_microtubule_associated_protein,_MAP65/ASE1_family_protein_HC_chr5:40981176-40985866_20140818
136.679	2.26924	1.9e-13	2.27e-10	157068_t	5667	helicase-like protein	Medtr3g085530.1_PIF1-like_helicase_LC_chr3:38658911-38655923_20140818
77.8213	2.26769	2.22e-06	0.000211697	MSTRG.42041.12	1799	tRNA-splicing endonuclease subunit Sen54-like isoform X1	Medtr8g090105.1_tRNA-splicing_endonuclease_subunit_sen54_amino-terminal_protein_HC_chr8:37741275-37738113_20140818
92.6182	2.26537	4.83e-05	0.00225904	MSTRG.15941.1	216	---NA---	---NA---
67.4148	2.26279	0.000359576	0.00978675	MSTRG.29655.1	1783	PAP-specific phosphatase HAL2-like	Medtr4g090525.1_3'(2'),5'-bisphosphate_nucleotidase_HC_chr4:35895525-35892579_20140818
79.4688	2.25989	4.54e-11	2.69e-08	MSTRG.32816.6	1232	SPFH/band 7/PHB domain membrane-associated family protein	Medtr4g107810.1_SPFH/band_7/PHB_domain_membrane-associated_family_protein_HC_chr4:44681842-44683641_20140818
81.9083	2.25879	9.03e-09	2.45e-06	MSTRG.81864.1	1702	CD2 antigen cytoplasmic tail-binding-like protein	Medtr2g008810.1_CD2_antigen_cytoplasmic_tail-binding-like_protein_HC_chr2:1625137-1630690_20140818
63.1908	2.25834	0.000122607	0.00448858	MSTRG.71306.1	302	---NA---	---NA---
191.99	2.25756	0.000299999	0.00857744	MSTRG.5965.1	286	transmembrane protein, putative	Medtr3g010283.1_transmembrane_protein,_putative_LC_chr3:2395543-2393930_20140818
67.631	2.25617	5.42e-05	0.00245757	10429_t	1038	PREDICTED: uncharacterized protein LOC108830220	Medtr7g062720.1_Copia-like_polyprotein/retrotransposon,_putative_LC_chr7:22824311-22825240_20140818
50.4262	2.25612	0.00213168	0.0337294	MSTRG.88553.3	1163	GDP-fucose protein O-fucosyltransferase	Medtr2g016470.1_GDP-fucose_protein_O-fucosyltransferase_HC_chr2:5049362-5045379_20140818
122.071	2.25592	1.06e-07	1.86e-05	MSTRG.5735.5	959	glutamyl-tRNA synthetase	Medtr8g009900.1_glutamyl-tRNA_synthetase_HC_chr8:2456519-2462483_20140818
44.7715	2.25204	0.00319085	0.0443189	MSTRG.12803.5	588	myb-like transcription factor family protein	Medtr4g086835.1_myb-like_transcription_factor_family_protein_HC_chr4:34055698-34052328_20140818
40.0809	2.25203	0.000792349	0.0170805	MSTRG.53453.21	1513	LRR and NB-ARC domain disease resistance protein	Medtr3g062340.1_NB-ARC_domain_disease_resistance_protein_LC_chr3:28140012-28152822_20140818
122.912	2.24944	1.91e-05	0.00111587	MSTRG.76815.8	1728	ADP-ribosylation factor-related protein 1-like	Medtr2g022200.1_ADP-ribosylation_factor-like_protein_A1D_HC_chr2:7631017-7626899_20140818
47.0911	2.24671	4.34e-05	0.002078	MSTRG.63965.14	1358	---NA---	Medtr3g099100.1_CBS/octicosapeptide/phox/Bemp1_(PB1)_domain_protein_HC_chr3:45426670-45434715_20140818
137.429	2.24455	3.76e-06	0.000317328	MSTRG.76815.4	2120	ADP-ribosylation factor-related protein 1	Medtr2g022200.1_ADP-ribosylation_factor-like_protein_A1D_HC_chr2:7631017-7626899_20140818
77.3014	2.24367	3.37e-08	7.09e-06	MSTRG.49120.1	2403	transmembrane protein, putative	Medtr8g095235.1_hypothetical_protein_LC_chr8:39842968-39841953_20140818
51.2135	2.24299	0.00365257	0.0484762	MSTRG.47680.2	716	metal ion-binding protein, putative	Medtr3g082250.1_metal_ion-binding_protein,_putative_HC_chr3:37132291-37130720_20140818
38.2709	2.24264	0.000268728	0.00791419	MSTRG.62897.3	1262	probable methyltransferase PMT13	Medtr7g076150.1_methyltransferase_PMT16,_putative_HC_chr7:28629556-28623898_20140818
230.659	2.24112	5.8e-08	1.13e-05	MSTRG.82289.1	1404	adenine nucleotide alpha hydrolase superfamily protein	Medtr1g054765.1_adenine_nucleotide_alpha_hydrolase_superfamily_protein_HC_chr1:23937943-23936722_20140818
59.0349	2.23781	0.00149774	0.0265605	164755_t	2436	disease resistance protein RPM1-like	Medtr3g069210.1_NB-ARC_domain_disease_resistance_protein_HC_chr3:30990418-30987078_20140818
109.572	2.23763	2.68e-06	0.000243791	MSTRG.43380.12	1022	---NA---	---NA---
70.5576	2.23535	2.19e-05	0.0012339	MSTRG.72517.4	982	---NA---	---NA---
595.149	2.2304	0.000939447	0.0193211	MSTRG.48197.2	477	hypothetical protein L195_g049697, partial	Medtr7g074865.1_NAD-dependent_epimerase/dehydratase_family_protein_LC_chr7:28002007-28002860_20140818
50.6349	2.22979	0.00013908	0.00491482	147753_t	804	rRNA intron-encoded homing endonuclease, putative	Medtr0052s0110.1_rRNA_intron-encoded_homing_endonuclease,_putative_HC_scaffold0052:50226-47921_20140818
38.1825	2.22917	0.000565	0.0134518	56268_t	1818	cyclic nucleotide gated channel protein	Medtr6g075440.1_cyclic_nucleotide_gated_channel_protein_HC_chr6:28025576-28036424_20140818
49.6209	2.22701	4.93e-05	0.00229229	MSTRG.3337.1	865	xanthine dehydrogenase/oxidase	Medtr2g098030.1_xanthine_dehydrogenase/oxidase_HC_chr2:41880188-41892592_20140818
105.826	2.22697	2.96e-06	0.000263105	MSTRG.45022.3	1073	replication factor-A carboxy-terminal domain protein	Medtr3g056270.1_replication_factor-A_carboxy-terminal_domain_protein_HC_chr3:22409504-22413525_20140818
88.7935	2.22619	0.000328946	0.00916894	MSTRG.33878.1	1910	P-loop nucleoside triphosphate hydrolase superfamily protein	Medtr8g098230.1_P-loop_nucleoside_triphosphate_hydrolase_superfamily_protein_HC_chr8:40988299-40979942_20140818
225.046	2.22438	7.73e-15	1.26e-11	MSTRG.63173.8	3905	NB-ARC domain disease resistance protein	Medtr3g466620.1_NB-ARC_domain_disease_resistance_protein_LC_chr3:27403732-27400482_20140818
166.709	2.2226	0.00026426	0.00782635	MSTRG.15585.1	345	---NA---	---NA---
818.923	2.22211	1.35e-05	0.000855888	83957_t	951	senescence-associated protein	Medtr0052s0140.1_hypothetical_protein_HC_scaffold0052:65682-64147_20140818
30.4696	2.2215	3.06e-05	0.0016067	MSTRG.16523.1	324	gag-pol polyprotein	Medtr1g052130.1_hypothetical_protein_LC_chr1:21010395-21010649_20140818
113.368	2.21992	1e-05	0.000675652	22993_t	516	translationally-controlled tumor-like protein	Medtr2g436620.1_translationally-controlled_tumor-like_protein_HC_chr2:14244772-14246983_20140818
126.692	2.21877	7.2e-07	8.74e-05	MSTRG.5735.6	922	glutamyl-tRNA synthetase	Medtr8g009900.1_glutamyl-tRNA_synthetase_HC_chr8:2456519-2462483_20140818
87.4159	2.21551	4.83e-07	6.34e-05	178451_t	4566	Ty3/gypsy retrotransposon protein	Medtr6g045307.1_IPP_transferase_LC_chr6:16235075-16228160_20140818
112.828	2.21534	1e-05	0.000675652	104995_t	516	translationally-controlled tumor-like protein	Medtr2g436620.1_translationally-controlled_tumor-like_protein_HC_chr2:14244772-14246983_20140818
49.9666	2.21493	8.8e-06	0.00061014	163622_t	2643	hypothetical protein TSUD_158760	Medtr2g092960.1_Myb/SANT-like_DNA-binding_domain_protein_LC_chr2:39569693-39563388_20140818
134.303	2.21391	0.00275784	0.0401589	MSTRG.72562.2	2243	glycoside hydrolase family 1 protein	Medtr4g081530.1_glycoside_hydrolase_family_1_protein_HC_chr4:31637194-31641130_20140818
62.6029	2.21331	8.46e-05	0.00341235	MSTRG.85508.15	1362	PPR containing plant protein	Medtr6g024415.1_PPR_containing_plant_protein_LC_chr6:8744390-8743759_20140818
35.9677	2.21324	0.000198966	0.00637919	MSTRG.63965.9	1584	hypothetical protein MTR_4g039945	Medtr5g010555.1_hypothetical_protein_HC_chr5:2852736-2852280_20140818
54.3981	2.21011	0.000211749	0.00667313	MSTRG.76815.2	1674	ADP-ribosylation factor-related protein 1	Medtr2g022200.1_ADP-ribosylation_factor-like_protein_A1D_HC_chr2:7631017-7626899_20140818
156.646	2.20938	2.24e-08	5.12e-06	MSTRG.50222.1	255	peroxidase 42	Medtr4g132110.2_cationic_peroxidase_HC_chr4:55186829-55184196_20140818
47.4697	2.20833	1.29e-05	0.00082518	86154_t	324	---NA---	---NA---
35.6736	2.20435	0.00046008	0.0116484	MSTRG.54925.1	937	---NA---	---NA---
95.404	2.20385	0.00379458	0.0497767	MSTRG.88316.1	1308	---NA---	---NA---
50.7562	2.20154	0.000187938	0.00612188	MSTRG.31778.4	1546	NBS-LRR type disease resistance protein	Medtr4g022540.1_NBS-LRR_type_disease_resistance_protein_LC_chr4:7519355-7523141_20140818
36.225	2.20017	0.000160296	0.0054627	MSTRG.29561.2	1213	23S rRNA m2A2503 methyltransferase	Medtr8g064490.1_23S_rRNA_m2A2503_methyltransferase_HC_chr8:27050679-27043455_20140818
271.683	2.1972	1.31e-08	3.29e-06	MSTRG.5314.1	432	50S ribosomal protein l4-like	Medtr5g089380.1_hypothetical_protein_LC_chr5:38848771-38849072_20140818
247.889	2.19619	1.69e-15	3.54e-12	MSTRG.55117.2	306	hypothetical protein glysoja_044789	Medtr1g103060.1_hypothetical_protein_LC_chr1:46627062-46627433_20140818
191.974	2.19485	0.0014159	0.025539	MSTRG.11336.1	6206	copia protein	Medtr3g102560.1_carboxy-terminal_domain_cyclin_HC_chr3:47265371-47267354_20140818
179.887	2.19302	8.99e-06	0.000620852	MSTRG.22795.1	2272	UDP-sugar pyrophosphorylase 1	Medtr3g088650.1_UTP-glucose-1-phosphate_uridylyltransferase_HC_chr3:40382946-40391125_20140818
128.868	2.19045	1.43e-05	0.000898092	MSTRG.14602.3	1905	hypothetical protein MTR_0275s0040, partial	Medtr0275s0040.1_hypothetical_protein_HC_scaffold0275:21984-21107_20140818
783.838	2.18936	6.47e-19	3.46e-15	106337_t	549	polyubiquitin	Medtr7g116360.2_polyubiquitin_3_HC_chr7:47989622-47990311_20140818
235.175	2.18769	9.18e-14	1.16e-10	MSTRG.47667.4	1068	digestive organ expansion factor-like protein	Medtr3g082420.2_hypothetical_protein_HC_chr3:37203737-37205754_20140818
42.8752	2.18705	0.000489212	0.0121497	49446_t	1383	2-succinylbenzoate-CoA ligase/peroxisomal protein	Medtr2g030240.1_2-succinylbenzoate-CoA_ligase/peroxisomal_protein_HC_chr2:11342493-11346176_20140818
154.947	2.18669	2.4e-07	3.62e-05	MSTRG.85742.1	1970	zinc induced facilitator-like protein	Medtr3g010850.1_zinc_induced_facilitator-like_protein_LC_chr3:2619747-2625343_20140818
423.636	2.18615	1.17e-13	1.45e-10	MSTRG.63173.7	7189	NB-ARC domain disease resistance protein	Medtr3g062090.1_NB-ARC_domain_disease_resistance_protein_LC_chr3:27987790-28006982_20140818
71.603	2.18575	0.000828244	0.0176109	MSTRG.12321.4	617	NAD-dependent aldehyde dehydrogenase family protein	Medtr4g106510.1_NAD-dependent_aldehyde_dehydrogenase_family_protein_HC_chr4:44176897-44181065_20140818
48.3174	2.18472	1.28e-07	2.16e-05	148069_t	1203	transcriptional activator FHA1	Medtr7g055863.1_transcriptional_activator_FHA1_HC_chr7:19263207-19260879_20140818
42.2561	2.18355	0.000194427	0.00627781	MSTRG.50867.2	1436	condensin-2 complex subunit H2-like protein	Medtr2g436080.1_condensin-2_complex_subunit_H2-like_protein_HC_chr2:13980124-13986564_20140818
86.4272	2.18277	0.000665605	0.0151264	MSTRG.10029.1	1195	leguminosin group485 secreted peptide	Medtr5g077290.1_leguminosin_group485_secreted_peptide_HC_chr5:33000236-32998991_20140818
169.348	2.17908	5.02e-12	4.03e-09	55343_t	3504	lysine--tRNA ligase-like	Medtr4g127770.1_lysine-tRNA_ligase-like_protein_LC_chr4:53118581-53107577_20140818
317.991	2.1738	0.0019119	0.0313135	MSTRG.41140.1	974	wound-responsive family protein	Medtr2g089970.1_wound-responsive_family_protein_HC_chr2:38046382-38046654_20140818
66.4349	2.17254	0.0022409	0.0348839	131302_t	2094	disease resistance protein (TIR-NBS-LRR class)	Medtr6g079140.1_disease_resistance_protein_(TIR-NBS-LRR_class)_HC_chr6:29804255-29799693_20140818
40.3097	2.17204	4.92e-05	0.00228818	MSTRG.12059.2	1055	cysteine-rich RLK (receptor-like kinase) protein	Medtr8g052060.1_cysteine-rich_RLK_(receptor-like_kinase)_protein_LC_chr8:19344516-19349230_20140818
135.377	2.1648	7.04e-07	8.56e-05	MSTRG.85508.2	1428	PPR containing plant protein	Medtr6g024415.1_PPR_containing_plant_protein_LC_chr6:8744390-8743759_20140818
97.7127	2.16399	4.7e-08	9.5e-06	MSTRG.86196.10	1870	transcription elongation factor SPT6 homolog	Medtr7g088700.1_global_transcription_factor_HC_chr7:34591539-34580098_20140818
40.3274	2.16394	0.00074642	0.0164071	34307_t	6564	DExH-box ATP-dependent RNA helicase DExH3 isoform X1	Medtr8g044260.1_ATP-dependent_RNA_helicase_DHX36-like_protein_HC_chr8:16995201-16976389_20140818
144.51	2.16133	2.91e-07	4.18e-05	MSTRG.85742.4	1757	protein ZINC INDUCED FACILITATOR-LIKE 1-like	Medtr3g010850.1_zinc_induced_facilitator-like_protein_LC_chr3:2619747-2625343_20140818
51.2589	2.15709	8.63e-05	0.00346029	MSTRG.84085.2	885	lysine-tRNA ligase	Medtr4g127790.1_lysine-tRNA_ligase_HC_chr4:53128791-53125507_20140818
88.7797	2.15655	9.79e-08	1.75e-05	21510_t	4044	gag-pol polyprotein	Medtr8g011410.1_cysteine-rich_RLK_(receptor-like_kinase)_protein_HC_chr8:3054719-3058128_20140818
136.264	2.155	2.13e-05	0.00121216	MSTRG.14602.1	1904	hypothetical protein MTR_0275s0040, partial	Medtr0275s0040.1_hypothetical_protein_HC_scaffold0275:21984-21107_20140818
51.8709	2.15374	6.87e-05	0.00293043	MSTRG.76815.3	1951	cyclopropane-fatty-acyl-phospholipid synthase	Medtr1g073700.1_cyclopropane-fatty-acyl-phospholipid_synthase_HC_chr1:32708616-32700293_20140818
32.4526	2.15033	3.3e-05	0.00170058	MSTRG.4234.3	1497	proton pump interactor, putative	Medtr2g090520.2_proton_pump_interactor,_putative_HC_chr2:38632503-38635088_20140818
1433.52	2.1497	3.91e-15	7.56e-12	MSTRG.21477.5	276	---NA---	Medtr5g032670.1_hypothetical_protein_HC_chr5:14074645-14075917_20140818
53.4348	2.14906	0.000404298	0.0106648	MSTRG.58712.4	1693	F-box/RNI superfamily protein, putative	Medtr7g087040.1_F-box/RNI_superfamily_protein,_putative_LC_chr7:33859934-33866416_20140818
1871.78	2.1476	1.15e-07	1.98e-05	147752_t	2673	hypothetical protein TanjilG_03599	Medtr0052s0070.1_senescence-associated_protein_HC_scaffold0052:21398-28183_20140818
103.288	2.14582	1.43e-05	0.000899364	MSTRG.76815.10	1219	ADP-ribosylation factor-related protein 1	Medtr2g022200.1_ADP-ribosylation_factor-like_protein_A1D_HC_chr2:7631017-7626899_20140818
216.466	2.14495	2.36e-09	8.12e-07	MSTRG.58895.6	787	predicted protein	predicted protein
44.651	2.14438	0.000329636	0.00918156	MSTRG.43087.1	585	---NA---	---NA---
38.2171	2.14383	0.000279072	0.00812534	58186_t	2259	P-loop nucleoside triphosphate hydrolase superfamily protein	Medtr8g098230.1_P-loop_nucleoside_triphosphate_hydrolase_superfamily_protein_HC_chr8:40988299-40979942_20140818
57.7659	2.14061	0.000147357	0.00512317	MSTRG.29464.2	2046	zinc finger BED domain-containing protein RICESLEEPER 2-like	Medtr4g120840.1_hypothetical_protein_HC_chr4:50046505-50047138_20140818
372.003	2.13935	7.68e-08	1.43e-05	MSTRG.52933.3	2281	poly(ADP-ribose) polymerase domain protein	Medtr4g053530.1_poly(ADP-ribose)_polymerase_domain_protein_HC_chr4:19342499-19346920_20140818
94.1699	2.13803	6.67e-07	8.2e-05	MSTRG.61236.1	250	histone 4	Medtr8g038460.1_histone_H4_domain_protein_HC_chr8:14261400-14260862_20140818
35.2215	2.13774	0.000166533	0.00562084	116950_t	399	60S ribosomal protein L18a-3	Medtr5g091135.1_60S_ribosomal_protein_L18a-3_HC_chr5:39716434-39718748_20140818
61.5203	2.1376	4.06e-06	0.000335057	MSTRG.23933.2	1138	hypothetical protein MTR_0275s0040, partial	Medtr0275s0040.1_hypothetical_protein_HC_scaffold0275:21984-21107_20140818
144.606	2.13745	2.21e-05	0.00124085	MSTRG.22721.3	3033	LRR and NB-ARC domain disease resistance protein	Medtr0425s0020.1_LRR_and_NB-ARC_domain_disease_resistance_protein_LC_scaffold0425:6387-10157_20140818
117.826	2.13638	0.00253876	0.0379825	MSTRG.41824.1	2126	GTP-binding elongation factor Tu family protein	Medtr1g089520.1_GTP-binding_elongation_factor_Tu_family_protein_HC_chr1:40034306-40036079_20140818
97.4263	2.13623	5.59e-08	1.09e-05	MSTRG.5735.4	945	glutamyl-tRNA synthetase	Medtr8g009900.1_glutamyl-tRNA_synthetase_HC_chr8:2456519-2462483_20140818
99.3074	2.13606	1.15e-06	0.000125832	88170_t	5559	disease resistance protein (TIR-NBS-LRR class)	Medtr7g078180.1_disease_resistance_protein_(TIR-NBS-LRR_class),_putative_LC_chr7:29570689-29575843_20140818
91.4241	2.13564	2.47e-06	0.000228805	MSTRG.44088.4	614	rRNA intron-encoded homing endonuclease, putative	Medtr0052s0110.1_rRNA_intron-encoded_homing_endonuclease,_putative_HC_scaffold0052:50226-47921_20140818
130.393	2.13459	9.95e-05	0.00385743	MSTRG.80493.1	832	NAD-dependent aldehyde dehydrogenase family protein	Medtr4g106510.1_NAD-dependent_aldehyde_dehydrogenase_family_protein_HC_chr4:44176897-44181065_20140818
87.9069	2.1337	1.5e-12	1.41e-09	MSTRG.86196.4	1375	probable tyrosine-protein phosphatase At1g05000	Medtr4g132810.1_tyrosine_specific_protein_phosphatase_family_protein_HC_chr4:55548045-55544901_20140818
112.288	2.13096	1.96e-05	0.00113444	MSTRG.45022.2	1334	replication factor-A carboxy-terminal domain protein	Medtr4g036240.3_replication_factor-A_carboxy-terminal_domain_protein_HC_chr4:11830210-11833873_20140818
40.8818	2.12877	1.16e-07	2e-05	MSTRG.15385.1	369	---NA---	---NA---
48.8598	2.12607	0.000409651	0.0107621	MSTRG.52085.4	612	aluminum activated malate transporter family protein	Medtr1g115190.1_aluminum_activated_malate_transporter_family_protein_HC_chr1:51860317-51863568_20140818
56.6006	2.12605	0.00295271	0.0420865	MSTRG.72562.3	2342	glycoside hydrolase family 1 protein	Medtr4g081530.1_glycoside_hydrolase_family_1_protein_HC_chr4:31637194-31641130_20140818
61.1443	2.12439	2.23e-06	0.000212022	164748_t	2637	NB-ARC domain disease resistance protein	Medtr3g055870.1_LRR_and_NB-ARC_domain_disease_resistance_protein_LC_chr3:22186461-22189188_20140818
168.885	2.12435	2.55e-08	5.69e-06	MSTRG.27521.10	1437	65-kDa microtubule-associated protein 1	Medtr5g093860.1_microtubule_associated_protein,_MAP65/ASE1_family_protein_HC_chr5:40981176-40985866_20140818
93.3264	2.12077	1.26e-08	3.18e-06	182956_t	1056	cysteine synthase-like isoform X1	Medtr1g081620.1_O-acetylserine_(thiol)_lyase_HC_chr1:36280172-36284490_20140818
58.5069	2.12045	9.45e-07	0.000108203	MSTRG.76015.1	1199	---NA---	---NA---
45.9693	2.11907	3.4e-05	0.00174386	MSTRG.59343.16	1563	NAD(P)H-dependent 6'-deoxychalcone synthase-like	Medtr3g083130.1_aldo/keto_reductase_family_oxidoreductase_HC_chr3:37505830-37503715_20140818
89.5814	2.11666	3.24e-08	6.86e-06	MSTRG.32816.2	1522	SPFH/band 7/PHB domain membrane-associated family protein	Medtr4g107810.2_SPFH/band_7/PHB_domain_membrane-associated_family_protein_HC_chr4:44680209-44683641_20140818
349.946	2.11436	6.12e-15	1.08e-11	89078_t	5283	NB-ARC domain disease resistance protein	Medtr3g466620.1_NB-ARC_domain_disease_resistance_protein_LC_chr3:27403732-27400482_20140818
110.354	2.11398	4.42e-05	0.00211054	MSTRG.45022.1	1372	replication factor-A carboxy-terminal domain protein	Medtr4g036240.3_replication_factor-A_carboxy-terminal_domain_protein_HC_chr4:11830210-11833873_20140818
167.341	2.11388	1.89e-06	0.000186477	MSTRG.77704.2	681	import inner membrane translocase protein	Medtr2g097870.2_import_inner_membrane_translocase_protein_HC_chr2:41812716-41810575_20140818
252.62	2.11317	2.74e-07	4.01e-05	MSTRG.47667.8	1206	digestive organ expansion factor-like protein	Medtr3g082420.2_hypothetical_protein_HC_chr3:37203737-37205754_20140818
214.927	2.11241	8.97e-11	5e-08	MSTRG.64428.1	4125	lysine--tRNA ligase-like	Medtr4g127770.1_lysine-tRNA_ligase-like_protein_LC_chr4:53118581-53107577_20140818
92.8747	2.11089	1.7e-08	4.06e-06	MSTRG.11956.1	236	---NA---	---NA---
92.0268	2.1096	6.07e-09	1.79e-06	MSTRG.32816.3	1455	SPFH/band 7/PHB domain membrane-associated family protein	Medtr4g107810.2_SPFH/band_7/PHB_domain_membrane-associated_family_protein_HC_chr4:44680209-44683641_20140818
98.0434	2.10439	2.7e-14	4.02e-11	MSTRG.86196.12	1358	transcription elongation factor SPT6 homolog	Medtr7g088700.1_global_transcription_factor_HC_chr7:34591539-34580098_20140818
52.9833	2.10296	3.18e-07	4.5e-05	MSTRG.85742.5	681	zinc induced facilitator-like protein	Medtr3g010850.2_zinc_induced_facilitator-like_protein_LC_chr3:2619747-2625343_20140818
102.398	2.10239	3.83e-06	0.00032148	MSTRG.56472.1	341	hypothetical protein PanWU01x14_118800	Medtr2g025350.1_transmembrane_protein,_putative_LC_chr2:9030476-9030927_20140818
64.318	2.101	2.7e-06	0.000245556	MSTRG.89425.2	540	---NA---	---NA---
79.098	2.10076	1.18e-05	0.000767829	MSTRG.70166.5	1028	calcineurin B-like protein 7	Medtr8g099575.1_calcineurin_B-like_protein_4-1_HC_chr8:42073701-42069913_20140818
67.9679	2.10007	8.85e-05	0.00352826	178082_t	1488	serine/threonine-protein phosphatase 7 long form homolog	Medtr0018s0300.1_hypothetical_protein_LC_scaffold0018:181713-179993_20140818
110.576	2.0975	2.66e-06	0.000242333	MSTRG.47741.18	611	NAD-dependent aldehyde dehydrogenase family protein	Medtr4g106510.1_NAD-dependent_aldehyde_dehydrogenase_family_protein_HC_chr4:44176897-44181065_20140818
288.289	2.09638	1.87e-07	2.93e-05	MSTRG.58349.1	990	hypothetical protein MTR_6g090460	Medtr6g090460.1_hypothetical_protein_HC_chr6:34039171-34037721_20140818
109.413	2.096	3.59e-06	0.00030619	MSTRG.85508.1	1451	PPR containing plant protein	Medtr6g024415.1_PPR_containing_plant_protein_LC_chr6:8744390-8743759_20140818
63.7406	2.09481	3.46e-05	0.00176543	MSTRG.33046.1	382	---NA---	---NA---
928.689	2.09478	3.25e-11	2.06e-08	MSTRG.43622.1	319	---NA---	Medtr4g059020.1_hypothetical_protein_LC_chr4:21781510-21780682_20140818
150.133	2.09	2.39e-11	1.59e-08	MSTRG.13365.1	5789	helicase-like protein	Medtr3g085530.1_PIF1-like_helicase_LC_chr3:38658911-38655923_20140818
357.44	2.08986	2.1e-11	1.43e-08	MSTRG.44802.2	3133	TPX2 (targeting protein for Xklp2) family protein	Medtr1g075310.1_TPX2_(targeting_protein_for_Xklp2)_family_protein_HC_chr1:33342141-33338595_20140818
92.4393	2.08975	3.05e-09	9.98e-07	MSTRG.86196.9	1543	tyrosine specific protein phosphatase family protein	Medtr4g132810.1_tyrosine_specific_protein_phosphatase_family_protein_HC_chr4:55548045-55544901_20140818
27.1697	2.08828	0.000336789	0.00932929	MSTRG.88886.7	333	germin family protein	Medtr4g017050.1_germin_family_protein_HC_chr4:5287228-5286312_20140818
37.378	2.08726	0.000332764	0.00925529	MSTRG.68723.2	323	---NA---	---NA---
115.359	2.08663	3.65e-06	0.000310231	MSTRG.24571.4	872	betaine aldehyde dehydrogenase 1, chloroplastic	Medtr4g106510.1_NAD-dependent_aldehyde_dehydrogenase_family_protein_HC_chr4:44176897-44181065_20140818
42.1171	2.08477	0.000554828	0.0132667	MSTRG.14893.2	328	---NA---	---NA---
416.916	2.08451	1.37e-07	2.28e-05	MSTRG.47010.1	874	plant invertase/pectin methylesterase inhibitor	Medtr4g035905.1_plant_invertase/pectin_methylesterase_inhibitor_HC_chr4:12711290-12710398_20140818
133.072	2.08114	1.33e-06	0.000141327	117252_t	756	isoaspartyl peptidase/L-asparaginase	Medtr4g109900.1_isoaspartyl_peptidase/L-asparaginase_HC_chr4:45733594-45731329_20140818
98.2341	2.0811	0.000139769	0.0049313	MSTRG.46962.1	1986	WRKY DNA-binding domain protein	Medtr2g075680.1_cysteine-tRNA_ligase_HC_chr2:31648412-31650755_20140818
204.531	2.07999	6.75e-07	8.27e-05	42156_t	882	transmembrane protein, putative	Medtr8g096660.1_hypothetical_protein_LC_chr8:40544044-40545603_20140818
128.922	2.07949	1.49e-09	5.43e-07	MSTRG.62946.2	1887	digalactosyldiacylglycerol synthase	Medtr6g091670.1_digalactosyldiacylglycerol_synthase_HC_chr6:34526786-34522519_20140818
163.313	2.07713	5.64e-07	7.17e-05	MSTRG.52933.12	1314	glycoside hydrolase family 79 amino-terminal domain protein	Medtr4g109300.1_glycoside_hydrolase_family_79_amino-terminal_domain_protein_HC_chr4:45387586-45390508_20140818
76.3275	2.07573	2.8e-05	0.00150361	MSTRG.44717.1	982	---NA---	---NA---
85.9265	2.07539	1.06e-06	0.000117969	MSTRG.86196.8	1637	transcription elongation factor SPT6 homolog	Medtr7g087460.1_global_transcription_factor_HC_chr7:34038977-34042168_20140818
97.3867	2.07112	5.22e-07	6.71e-05	MSTRG.17936.2	1508	gag-pol polyprotein	gag-pol polyprotein
142.046	2.06969	1.98e-05	0.00114348	MSTRG.22721.8	2767	LRR and NB-ARC domain disease resistance protein	Medtr0425s0020.1_LRR_and_NB-ARC_domain_disease_resistance_protein_LC_scaffold0425:6387-10157_20140818
331.281	2.06947	2.86e-07	4.14e-05	MSTRG.52933.4	1980	poly(ADP-ribose) polymerase domain protein	Medtr4g053530.1_poly(ADP-ribose)_polymerase_domain_protein_HC_chr4:19342499-19346920_20140818
98.9921	2.069	7.37e-06	0.000531422	MSTRG.5933.2	1148	protein FRA10AC1	Medtr8g037265.1_folate-sensitive_fragile_site_protein_FRA10AC1_HC_chr8:13834849-13841481_20140818
118.792	2.06868	0.00232239	0.0357857	3252_t	1755	replication factor-A carboxy-terminal domain protein	Medtr4g036240.2_replication_factor-A_carboxy-terminal_domain_protein_HC_chr4:11830642-11833873_20140818
355.627	2.06611	9.03e-14	1.15e-10	MSTRG.21477.3	381	---NA---	Medtr5g032670.1_hypothetical_protein_HC_chr5:14074645-14075917_20140818
55.1692	2.06606	4e-06	0.000331621	MSTRG.53236.5	426	SNF2 family amino-terminal protein	Medtr4g118720.1_SNF2_family_amino-terminal_protein_HC_chr4:49190490-49169826_20140818
122.17	2.06582	8.93e-05	0.00354824	MSTRG.84591.3	1553	NAD(P)H-dependent 6'-deoxychalcone synthase-like	Medtr3g083130.1_aldo/keto_reductase_family_oxidoreductase_HC_chr3:37505830-37503715_20140818
128.286	2.06314	0.000205853	0.00653909	49572_t	1119	isoliquiritigenin 2'-O-methyltransferase	Medtr1g096310.1_caffeic_acid_O-methyltransferase_HC_chr1:43364174-43366117_20140818
143.939	2.06217	9.2e-07	0.000105956	MSTRG.58484.2	1760	serine/threonine-protein phosphatase 7 long form homolog	Medtr3g011100.1_F-box_and_associated_interaction_domain_protein_HC_chr3:2698683-2696484_20140818
315.516	2.0619	3.28e-10	1.52e-07	MSTRG.32847.6	1647	cysteine synthase-like isoform X1	Medtr1g081620.1_O-acetylserine_(thiol)_lyase_HC_chr1:36280172-36284490_20140818
286.286	2.05952	2.87e-10	1.34e-07	MSTRG.44802.3	2790	TPX2 (targeting protein for Xklp2) family protein	Medtr1g075310.1_TPX2_(targeting_protein_for_Xklp2)_family_protein_HC_chr1:33342141-33338595_20140818
119.615	2.05643	3.47e-05	0.00177146	MSTRG.11031.1	325	transmembrane protein, putative	Medtr7g098020.1_transmembrane_protein,_putative_LC_chr7:39171589-39171404_20140818
378.423	2.05637	3.5e-07	4.89e-05	MSTRG.80450.4	1048	transmembrane protein, putative	Medtr3g015420.1_transmembrane_protein,_putative_HC_chr3:4461069-4459937_20140818
64.1113	2.05384	4.49e-11	2.69e-08	MSTRG.20584.1	300	flavin containing monooxygenase FMO GS-OX-like protein	Medtr8g037910.3_flavin_containing_monooxygenase_FMO_GS-OX-like_protein_HC_chr8:14046330-14042504_20140818
366.085	2.05346	2.4e-09	8.18e-07	MSTRG.58748.4	1670	RNA-binding KH domain protein	Medtr2g005590.2_RNA-binding_KH_domain_protein_HC_chr2:223815-220572_20140818
127.18	2.05329	3.71e-07	5.12e-05	MSTRG.13389.1	443	unknown	unknown
185.741	2.05165	2.27e-06	0.00021467	MSTRG.85742.2	2153	zinc induced facilitator-like protein	Medtr3g010850.1_zinc_induced_facilitator-like_protein_LC_chr3:2619747-2625343_20140818
264.5	2.05061	1.32e-08	3.3e-06	MSTRG.27521.7	1967	65-kDa microtubule-associated protein 1-like	Medtr5g093860.1_microtubule_associated_protein,_MAP65/ASE1_family_protein_HC_chr5:40981176-40985866_20140818
30.3148	2.04867	0.000209997	0.00663535	MSTRG.48982.1	1547	pentatricopeptide repeat-containing protein At4g21065-like	Medtr3g005330.1_PPR_containing_plant-like_protein_HC_chr3:156847-154639_20140818
51.3972	2.0483	3.17e-06	0.000277488	MSTRG.1142.15	2226	probable myosin-binding protein 5	Medtr0168s0060.1_zein-binding_protein_HC_scaffold0168:18855-21061_20140818
159.806	2.04829	6.62e-05	0.00284984	MSTRG.38506.5	2505	zinc finger BED domain-containing protein RICESLEEPER 2-like	Medtr5g034530.1_hypothetical_protein_LC_chr5:14993712-14993306_20140818
73.498	2.04808	6.17e-09	1.81e-06	88169_t	3009	RIC1-like protein	Medtr7g078170.1_RIC1-like_protein_HC_chr7:29558486-29569548_20140818
311.542	2.04437	1.03e-07	1.82e-05	MSTRG.27521.8	2514	65-kDa microtubule-associated protein 1	Medtr5g093860.1_microtubule_associated_protein,_MAP65/ASE1_family_protein_HC_chr5:40981176-40985866_20140818
73.712	2.0432	0.000187539	0.00611513	187647_t	1104	cathepsin propeptide inhibitor domain protein	Medtr6g087720.1_cathepsin_propeptide_inhibitor_domain_protein_LC_chr6:33004154-33003216_20140818
158.354	2.04278	1.29e-09	4.81e-07	62606_t	1170	60S ribosomal protein L3	Medtr1g098540.1_60S_ribosomal_protein_L3B_HC_chr1:44369848-44366402_20140818
68.9388	2.04159	1.98e-06	0.000193615	MSTRG.55090.1	463	carbohydrate esterase plant-like protein	Medtr1g107475.2_carbohydrate_esterase_plant-like_protein_HC_chr1:48778009-48779601_20140818
98.3922	2.03817	1.46e-06	0.000151575	193983_t	4911	Ty3/gypsy retrotransposon protein	Medtr6g045307.1_IPP_transferase_LC_chr6:16235075-16228160_20140818
49.4638	2.03813	1.45e-06	0.000151006	MSTRG.1142.9	2382	probable myosin-binding protein 5	Medtr0168s0060.1_zein-binding_protein_HC_scaffold0168:18855-21061_20140818
46.8789	2.037	2.84e-05	0.00151644	MSTRG.81868.4	694	RNA polymerase II transcriptional coactivator KIWI-like	Medtr3g096690.1_RNA_polymerase_II_transcriptional_coactivator_HC_chr3:44248657-44250867_20140818
58.2053	2.03696	0.000894726	0.0186583	120448_t	2517	F-box/RNI/FBD-like domain protein	Medtr7g087840.1_F-box/FBD/LRR_protein_LC_chr7:34145858-34152025_20140818
47.7336	2.03593	0.000625928	0.0144688	31724_t	1668	hypersensitive-induced reaction 1 protein	Medtr4g107810.1_SPFH/band_7/PHB_domain_membrane-associated_family_protein_HC_chr4:44681842-44683641_20140818
60.0452	2.03158	0.000504813	0.0124101	MSTRG.8546.1	627	---NA---	---NA---
384.642	2.03144	1.39e-15	2.95e-12	MSTRG.63173.18	5438	NB-ARC domain disease resistance protein	Medtr3g466620.1_NB-ARC_domain_disease_resistance_protein_LC_chr3:27403732-27400482_20140818
124.819	2.02687	1.08e-06	0.000119448	59981_t	4290	disease resistance protein (TIR-NBS-LRR class)	Medtr4g020490.1_disease_resistance_protein_(TIR-NBS-LRR_class)_LC_chr4:6504602-6497070_20140818
900.744	2.026	2.5e-15	5.1e-12	MSTRG.37201.3	408	octicosapeptide/phox/Bem1p family protein	Medtr1g109470.1_octicosapeptide/phox/Bem1p_family_protein_HC_chr1:49509995-49513014_20140818
136.251	2.02525	9.17e-08	1.66e-05	167776_t	2712	IMP dehydrogenase/GMP reductase, putative	Medtr3g082420.2_hypothetical_protein_HC_chr3:37203737-37205754_20140818
66.3324	2.0251	0.000134728	0.00479381	139589_t	1464	60S ribosomal export protein nmd3-like	Medtr4g107030.1_nonsense-mediated_mRNA_decay_NMD3_family_protein_HC_chr4:43995360-43996798_20140818
37.6236	2.02386	3.5e-05	0.0017784	MSTRG.85742.3	882	zinc induced facilitator-like protein	Medtr3g010850.1_zinc_induced_facilitator-like_protein_LC_chr3:2619747-2625343_20140818
116.278	2.02358	2.61e-07	3.88e-05	MSTRG.46946.1	937	transmembrane protein, putative	Medtr2g075480.1_hypothetical_protein_HC_chr2:31575092-31574361_20140818
56.6272	2.02327	0.00119233	0.0227374	MSTRG.10783.1	768	fasciclin-like arabinogalactan protein 16 precursor	Medtr7g106760.1_fasciclin-like_arabinogalactan_protein_16_precursor_HC_chr7:43481515-43477779_20140818
123.445	2.02211	0.000147916	0.00513685	MSTRG.22721.10	2878	LRR and NB-ARC domain disease resistance protein	Medtr0425s0020.1_LRR_and_NB-ARC_domain_disease_resistance_protein_LC_scaffold0425:6387-10157_20140818
61.8929	2.01774	0.000219531	0.00684999	32529_t	600	hypothetical protein MTR_6g021860	Medtr6g021860.1_hypothetical_protein_LC_chr6:7558677-7559188_20140818
120.543	2.01566	2.08e-06	0.000201012	13451_t	4086	gag-pol polyprotein	Medtr3g093120.1_SPFH_domain/band_7_family_protein_LC_chr3:42570339-42574091_20140818
129.651	2.01459	4.75e-06	0.000377765	MSTRG.58484.3	2013	serine/threonine-protein phosphatase 7 long form homolog	Medtr3g011100.1_F-box_and_associated_interaction_domain_protein_HC_chr3:2698683-2696484_20140818
132.014	2.01336	9.39e-07	0.000107725	MSTRG.11001.1	1601	hypothetical protein MTR_4g133250	Medtr4g133250.1_hypothetical_protein_HC_chr4:55745010-55743934_20140818
350.461	2.01262	4.78e-09	1.45e-06	MSTRG.27521.6	2423	65-kDa microtubule-associated protein 1-like	Medtr5g093860.1_microtubule_associated_protein,_MAP65/ASE1_family_protein_HC_chr5:40981176-40985866_20140818
121.193	2.01156	1.31e-06	0.000139954	180431_t	504	chaperone protein DnaJ 11	Medtr5g022180.1_chaperone_protein_DnaJ_11_HC_chr5:8707162-8708042_20140818
122.766	2.00962	8.2e-05	0.0033321	MSTRG.14602.2	2044	hypothetical protein MTR_0275s0040, partial	Medtr0275s0040.1_hypothetical_protein_HC_scaffold0275:21984-21107_20140818
191.075	2.00901	9.85e-09	2.64e-06	MSTRG.7049.4	2758	replication factor-A carboxy-terminal domain protein	Medtr7g110100.1_replication_factor-A_carboxy-terminal_domain_protein_HC_chr7:45127464-45130150_20140818
41.1806	2.00816	0.000467883	0.0117824	54671_t	1170	3'(2'),5'-bisphosphate nucleotidase	Medtr4g090525.1_3'(2'),5'-bisphosphate_nucleotidase_HC_chr4:35895525-35892579_20140818
41.0907	2.0057	0.000522914	0.0127271	56292_t	1419	stress-induced receptor-like kinase	Medtr1g031560.1_stress-induced_receptor-like_kinase_LC_chr1:11035312-11032638_20140818
71.65	2.00268	3.73e-05	0.00186709	MSTRG.57615.3	460	Glutamate--tRNA ligase, chloroplastic/mitochondrial	Medtr8g009900.1_glutamyl-tRNA_synthetase_HC_chr8:2456519-2462483_20140818
43.1934	2.0022	3.97e-06	0.000330486	64352_t	2520	receptor-like protein	Medtr6g039180.1_receptor-like_protein_LC_chr6:14113204-14108786_20140818
46.4574	2.00182	0.000539155	0.0129841	MSTRG.26897.3	1055	AP2-like ethylene-responsive transcription factor	Medtr8g068510.1_AP2-like_ethylene-responsive_transcription_factor_LC_chr8:28591359-28586114_20140818
37.9862	2.00004	4.11e-05	0.00199854	85682_t	1857	heat shock cognate 70 kDa protein	Medtr2g032550.1_heat_shock_70_kDa_protein_HC_chr2:12244311-12246622_20140818
99.4896	1.99903	2.21e-06	0.000210613	MSTRG.67534.10	3427	nucleoporin autopeptidase	Medtr1g078040.2_nucleoporin_autopeptidase_HC_chr1:34898558-34890792_20140818
40.5196	1.99792	0.00342371	0.0464537	MSTRG.81612.4	1188	hypothetical protein TSUD_293440	hypothetical protein TSUD_293440
140.782	1.99445	3.05e-07	4.37e-05	MSTRG.25511.2	2228	LRR and NB-ARC domain disease resistance protein	Medtr7g018850.1_LRR_and_NB-ARC_domain_disease_resistance_protein_LC_chr7:6251896-6245587_20140818
44.9706	1.99442	9.01e-06	0.000621988	MSTRG.19044.3	713	phototropic-responsive NPH3 family protein	Medtr7g108290.1_phototropic-responsive_NPH3_family_protein_HC_chr7:44050581-44040258_20140818
341.161	1.99282	6.74e-09	1.95e-06	MSTRG.30595.1	201	cytochrome P450 family 96 protein, putative	Medtr5g019820.1_hypothetical_protein_LC_chr5:7525320-7524963_20140818
95.954	1.99151	2.63e-10	1.26e-07	MSTRG.67534.11	2610	nucleoporin autopeptidase	Medtr1g078040.2_nucleoporin_autopeptidase_HC_chr1:34898558-34890792_20140818
37.2292	1.99107	3.35e-07	4.71e-05	MSTRG.42614.2	728	---NA---	---NA---
213.737	1.9902	7.54e-14	9.98e-11	190316_t	4254	disease resistance protein RGA4	Medtr5g070960.1_disease_resistance_protein_RGA4_HC_chr5:30062044-30058913_20140818
317.792	1.98978	8.05e-05	0.00328506	MSTRG.76402.3	690	glycoside hydrolase family 1 protein	Medtr4g016920.2_glycoside_hydrolase_family_1_protein_HC_chr4:5220628-5215987_20140818
78.2432	1.98846	0.000141397	0.00497513	MSTRG.72594.2	2125	zinc finger BED domain-containing protein RICESLEEPER 2-like	Medtr5g034530.1_hypothetical_protein_LC_chr5:14993712-14993306_20140818
80.6595	1.98846	2.23e-06	0.000212334	MSTRG.67918.3	1725	NBS-LRR protein	Medtr3g062320.1_NB-ARC_domain_disease_resistance_protein_LC_chr3:28127135-28137313_20140818
109.829	1.98629	5.66e-09	1.68e-06	MSTRG.4384.1	351	---NA---	---NA---
171.999	1.98599	3.04e-07	4.35e-05	MSTRG.27488.3	11443	CC-NBS-LRR resistance protein	Medtr8g028500.1_Rpp4C1_HC_chr8:10848011-10860059_20140818
91.3494	1.98428	9.69e-05	0.00378148	MSTRG.7909.4	905	Ulp1 protease family, carboxy-terminal domain protein	Medtr7g046380.1_Ulp1_protease_family,_carboxy-terminal_domain_protein_HC_chr7:16432801-16434835_20140818
69.0468	1.98339	0.000427172	0.0110703	MSTRG.79443.1	222	2-hydroxyisoflavanone dehydratase	Medtr7g051020.1_2-hydroxyisoflavanone_dehydratase_HC_chr7:17840986-17842363_20140818
44.9303	1.97977	8.29e-05	0.00335411	MSTRG.61957.4	941	F-box protein	Medtr1g100280.1_F-box_protein_LC_chr1:45195549-45196942_20140818
32.7596	1.97823	2.9e-05	0.00154102	MSTRG.86202.1	486	---NA---	---NA---
44.1722	1.97786	0.00366039	0.0485551	MSTRG.88553.4	1113	GDP-fucose protein O-fucosyltransferase	Medtr2g016470.1_GDP-fucose_protein_O-fucosyltransferase_HC_chr2:5049362-5045379_20140818
163.4	1.9778	6.19e-10	2.52e-07	MSTRG.39409.1	373	myelodysplasia-myeloid leukemia factor 1-interacting protein	Medtr4g102250.1_myelodysplasia-myeloid_leukemia_factor_1-interacting_protein_HC_chr4:42300094-42304057_20140818
43.1573	1.97771	2.05e-05	0.00117654	MSTRG.46487.2	559	inosine triphosphate pyrophosphatase	Medtr1g047390.1_inosine_triphosphate_pyrophosphatase_HC_chr1:17926945-17932743_20140818
196.343	1.97566	2.66e-10	1.26e-07	MSTRG.86196.5	1742	global transcription factor	Medtr7g088700.1_global_transcription_factor_HC_chr7:34591539-34580098_20140818
192.009	1.97555	2.54e-06	0.000233706	MSTRG.63965.2	1778	hypothetical protein MTR_4g039945	Medtr5g010555.1_hypothetical_protein_HC_chr5:2852736-2852280_20140818
135.563	1.9749	1.86e-07	2.92e-05	59230_t	4365	disease resistance protein (TIR-NBS-LRR class)	Medtr4g020490.1_disease_resistance_protein_(TIR-NBS-LRR_class)_LC_chr4:6504602-6497070_20140818
98.2558	1.97466	4.33e-06	0.000351144	MSTRG.73146.5	853	glutamyl-tRNA synthetase	Medtr8g009900.1_glutamyl-tRNA_synthetase_HC_chr8:2456519-2462483_20140818
98.0825	1.97295	0.000174229	0.00579723	MSTRG.67669.1	303	transmembrane protein, putative	Medtr7g098020.1_transmembrane_protein,_putative_LC_chr7:39171589-39171404_20140818
98.4919	1.97282	1.36e-05	0.000859788	89066_t	6789	cysteine-rich receptor-like protein kinase	Medtr3g466590.1_hypothetical_protein_LC_chr3:27376193-27381419_20140818
793.036	1.97272	3.79e-12	3.15e-09	MSTRG.85365.2	584	50S ribosomal protein l4-like	Medtr5g089380.1_hypothetical_protein_LC_chr5:38848771-38849072_20140818
411.802	1.97252	2.79e-13	3.2e-10	MSTRG.44802.5	2589	TPX2 (targeting protein for Xklp2) family protein	Medtr1g075310.1_TPX2_(targeting_protein_for_Xklp2)_family_protein_HC_chr1:33342141-33338595_20140818
146.518	1.97223	3.42e-06	0.000294454	MSTRG.52286.3	625	isoaspartyl peptidase/L-asparaginase	Medtr4g109900.1_isoaspartyl_peptidase/L-asparaginase_HC_chr4:45733594-45731329_20140818
32.3422	1.97098	0.000913034	0.0189407	MSTRG.24572.2	788	AGC kinase	Medtr1g042700.1_AGC_kinase_HC_chr1:15872146-15867493_20140818
543.775	1.97087	0.000486434	0.012102	MSTRG.73426.3	1220	---NA---	---NA---
191.015	1.96893	1.14e-08	2.96e-06	MSTRG.7049.3	2518	replication factor-A carboxy-terminal domain protein	Medtr7g110100.1_replication_factor-A_carboxy-terminal_domain_protein_HC_chr7:45127464-45130150_20140818
44.912	1.96764	0.00298232	0.042345	MSTRG.88438.1	226	---NA---	---NA---
340.858	1.96398	1.19e-06	0.000130044	MSTRG.76402.1	2897	putative retrotransposon Ty3-gypsy subclass protein	Medtr4g016920.1_glycoside_hydrolase_family_1_protein_HC_chr4:5221708-5216027_20140818
902.47	1.96382	0.00211683	0.0335492	MSTRG.9889.56	1074	proline-rich protein	proline-rich protein
60.0891	1.96237	3.85e-05	0.00191039	MSTRG.54924.2	1397	---NA---	---NA---
55.8668	1.96211	4.18e-05	0.00202269	100939_t	1356	receptor-like kinase	Medtr1g027040.1_receptor-like_kinase_LC_chr1:8925788-8927830_20140818
244.312	1.96202	1.23e-11	8.8e-09	MSTRG.86196.3	1934	global transcription factor	Medtr7g088700.1_global_transcription_factor_HC_chr7:34591539-34580098_20140818
254.145	1.96077	0.00237985	0.0363959	MSTRG.62466.16	551	transmembrane protein, putative	Medtr3g016080.1_transmembrane_protein,_putative_LC_chr3:4763213-4761952_20140818
44.1826	1.95285	0.000594715	0.0139429	144730_t	366	---NA---	---NA---
65.8953	1.94962	1.2e-05	0.000778451	MSTRG.58005.2	313	hypothetical protein MTR_7g074470	Medtr7g074470.1_hypothetical_protein_LC_chr7:27833510-27832868_20140818
37.2392	1.94882	2.83e-05	0.00151574	MSTRG.28149.2	1329	---NA---	---NA---
52.7106	1.94829	4.49e-05	0.0021344	MSTRG.48062.1	273	---NA---	---NA---
80.7652	1.94696	3.78e-09	1.2e-06	MSTRG.61268.9	963	glutathione S-transferase, amino-terminal domain protein	Medtr8g098430.1_glutathione_S-transferase,_amino-terminal_domain_protein_HC_chr8:40882266-40879266_20140818
181.412	1.94635	9.25e-08	1.67e-05	MSTRG.7049.1	2607	replication factor-A carboxy-terminal domain protein	Medtr7g110100.1_replication_factor-A_carboxy-terminal_domain_protein_HC_chr7:45127464-45130150_20140818
65.3647	1.94012	0.000203064	0.00647693	MSTRG.59056.3	1814	transmembrane protein, putative	Medtr2g035720.1_transmembrane_protein,_putative_LC_chr2:15143683-15144876_20140818
87.3689	1.9398	0.00210436	0.0334166	MSTRG.1695.1	1349	zeaxanthin epoxidase, chloroplastic-like	Medtr5g017350.2_zeaxanthin_epoxidase_HC_chr5:6313511-6323118_20140818
63.6621	1.93942	5.47e-10	2.31e-07	MSTRG.86196.11	1062	topless-related protein 1	Medtr4g009840.1_topless-like_protein_HC_chr4:2077221-2085811_20140818
4512.51	1.93868	0.00085465	0.0180544	83698_t	3054	BnaC08g46150D	Medtr0052s0070.1_senescence-associated_protein_HC_scaffold0052:21398-28183_20140818
49.4746	1.93487	1.84e-10	9.51e-08	MSTRG.62697.1	800	E3 ubiquitin-protein ligase PRT1-like protein, putative	Medtr4g022320.1_E3_ubiquitin-protein_ligase_PRT1-like_protein,_putative_HC_chr4:7389370-7382599_20140818
121.234	1.93335	2.77e-08	6.06e-06	MSTRG.70166.3	1814	calcineurin B-like protein 7	Medtr8g099575.1_calcineurin_B-like_protein_4-1_HC_chr8:42073701-42069913_20140818
124.757	1.93332	8.02e-07	9.53e-05	MSTRG.70166.2	1828	calcineurin B-like protein 7	Medtr8g099575.1_calcineurin_B-like_protein_4-1_HC_chr8:42073701-42069913_20140818
74.6223	1.93324	0.000126416	0.00458764	MSTRG.81986.3	1299	P-loop nucleoside triphosphate hydrolase superfamily protein	Medtr8g098230.1_P-loop_nucleoside_triphosphate_hydrolase_superfamily_protein_HC_chr8:40988299-40979942_20140818
80.0416	1.93319	0.000713728	0.0158958	MSTRG.38425.1	240	transmembrane protein, putative	Medtr7g098020.1_transmembrane_protein,_putative_LC_chr7:39171589-39171404_20140818
131.993	1.93046	7.03e-05	0.00297978	MSTRG.84639.1	1457	probable protein phosphatase 2C 11	Medtr1g115570.1_protein_phosphatase_2C-like_protein_HC_chr1:52256072-52260436_20140818
49.4266	1.92792	0.000127669	0.00462119	MSTRG.42929.6	2020	cyclic nucleotide gated channel protein	Medtr6g075440.1_cyclic_nucleotide_gated_channel_protein_HC_chr6:28025576-28036424_20140818
53.5955	1.92639	8.87e-05	0.00353306	MSTRG.59343.10	897	NAD(P)H-dependent 6'-deoxychalcone synthase-like	Medtr3g083130.1_aldo/keto_reductase_family_oxidoreductase_HC_chr3:37505830-37503715_20140818
174.445	1.92464	1.77e-05	0.00105579	MSTRG.63965.4	1543	hypothetical protein MTR_4g039945	Medtr5g010555.1_hypothetical_protein_HC_chr5:2852736-2852280_20140818
59.7857	1.92189	1.03e-06	0.000114954	MSTRG.54949.1	1267	ABC transporter family protein, putative	Medtr3g085200.1_ABC_transporter_family_protein,_putative_LC_chr3:38510118-38508471_20140818
31.9083	1.9197	0.00219217	0.0344091	60798_t	360	chilling-induced protein, putative	Medtr2g078780.1_chilling-induced_protein,_putative_HC_chr2:32982837-32982175_20140818
39.6441	1.91951	0.00377929	0.0496435	MSTRG.19698.1	2747	receptor-like protein	Medtr3g452770.1_leucine-rich_receptor-like_kinase_family_protein,_putative_LC_chr3:19380084-19382453_20140818
115.553	1.918	3.82e-06	0.000321243	MSTRG.70166.4	1843	calcineurin B-like protein 7	Medtr8g099575.1_calcineurin_B-like_protein_4-1_HC_chr8:42073701-42069913_20140818
57.3607	1.91715	0.00186531	0.0308276	MSTRG.6871.1	781	---NA---	Medtr5g053210.1_hypothetical_protein_LC_chr5:21924986-21925372_20140818
79.4713	1.91685	0.000308185	0.00875191	MSTRG.44088.1	812	hypothetical protein L484_002552	Medtr0055s0130.1_hypothetical_protein_HC_scaffold0055:73353-68450_20140818
44.5995	1.91564	8.26e-06	0.000579801	MSTRG.82361.4	251	---NA---	---NA---
57.1103	1.91549	7.9e-05	0.00323937	23174_t	906	Cytochrome cd1-nitrite reductase-like, C-terminal haem d1	Medtr7g451160.1_hypothetical_protein_LC_chr7:17166883-17166125_20140818
161.818	1.91543	2.12e-10	1.05e-07	MSTRG.86196.7	1563	transcription elongation factor SPT6 homolog	Medtr7g088700.1_global_transcription_factor_HC_chr7:34591539-34580098_20140818
51.7266	1.91515	0.00130896	0.0241729	MSTRG.43798.4	2114	WNK kinase	Medtr8g093090.2_WNK_kinase_HC_chr8:38904456-38908200_20140818
39.8349	1.91478	9.06e-06	0.000623624	MSTRG.28121.4	426	tyrosine kinase family protein	Medtr6g082890.1_tyrosine_kinase_family_protein_HC_chr6:30965021-30962641_20140818
51.0026	1.91384	0.000308654	0.00876257	MSTRG.25453.3	861	ABC transporter family protein, putative	Medtr3g085200.1_ABC_transporter_family_protein,_putative_LC_chr3:38510118-38508471_20140818
242.147	1.91151	1.05e-06	0.000117468	MSTRG.80450.8	517	transmembrane protein, putative	Medtr3g015420.1_transmembrane_protein,_putative_HC_chr3:4461069-4459937_20140818
1109.2	1.91062	2.04e-10	1.03e-07	MSTRG.85095.1	1051	short-chain type dehydrogenase/reductase-like protein	Medtr7g094520.1_short-chain_dehydrogenase/reductase_HC_chr7:37629739-37628446_20140818
142.017	1.91057	2.68e-07	3.96e-05	59234_t	4365	disease resistance protein (TIR-NBS-LRR class)	Medtr4g020490.1_disease_resistance_protein_(TIR-NBS-LRR_class)_LC_chr4:6504602-6497070_20140818
72.9564	1.9086	0.000381422	0.0102215	MSTRG.63966.1	809	---NA---	---NA---
47.2865	1.90845	1.61e-06	0.000163989	68480_t	2436	FAD/NAD(P)-binding oxidoreductase family protein	Medtr3g085660.1_FAD/NAD(P)-binding_oxidoreductase_family_protein_HC_chr3:38751810-38758033_20140818
53.0274	1.90824	2.4e-05	0.00132275	MSTRG.86213.6	222	---NA---	---NA---
38.3119	1.9077	0.000100696	0.00389125	MSTRG.60339.7	2008	serine carboxypeptidase-like 20	Medtr7g080180.1_serine_carboxypeptidase-like_protein_HC_chr7:30489482-30482239_20140818
62.1865	1.90752	4.08e-06	0.000335769	27808_t	1257	telomere-associated protein RIF1-like isoform X2	Medtr3g086220.1_hypothetical_protein_HC_chr3:39010613-39016559_20140818
235.934	1.90598	5.12e-11	2.99e-08	MSTRG.63173.10	1904	NB-ARC domain disease resistance protein	Medtr3g466620.1_NB-ARC_domain_disease_resistance_protein_LC_chr3:27403732-27400482_20140818
177.172	1.90566	2.03e-07	3.15e-05	MSTRG.9276.2	545	esterase/lipase/thioesterase family protein	Medtr2g039480.1_esterase/lipase/thioesterase_family_protein_HC_chr2:17302990-17297098_20140818
88.5155	1.90418	0.00293658	0.0419261	46898_t	594	plant invertase/pectin methylesterase inhibitor	Medtr4g035905.1_plant_invertase/pectin_methylesterase_inhibitor_HC_chr4:12711290-12710398_20140818
328.255	1.90356	5.97e-11	3.46e-08	MSTRG.16647.2	5691	NB-ARC domain disease resistance protein	Medtr5g070960.1_disease_resistance_protein_RGA4_HC_chr5:30062044-30058913_20140818
166.661	1.90117	2.54e-05	0.00138848	MSTRG.63965.7	1454	hypothetical protein MTR_4g039945	Medtr5g010555.1_hypothetical_protein_HC_chr5:2852736-2852280_20140818
43.9875	1.90071	0.000913903	0.0189485	90520_t	528	putative mitochondrial protein	Medtr3g435560.1_hypothetical_protein_LC_chr3:11677430-11678921_20140818
55.561	1.89938	5.73e-05	0.00256152	MSTRG.46514.1	496	hypothetical protein MTR_4g029730	Medtr4g029730.1_hypothetical_protein_HC_chr4:10333500-10334073_20140818
43.6367	1.898	5.14e-05	0.00235712	MSTRG.12059.3	1840	cysteine-rich RLK (receptor-like kinase) protein	Medtr8g052420.1_cysteine-rich_RLK_(receptor-like_kinase)_protein_LC_chr8:19504888-19499824_20140818
42.9569	1.89563	0.00017435	0.00580001	MSTRG.79075.1	749	---NA---	---NA---
181.436	1.89542	1.36e-06	0.000143751	MSTRG.27488.5	10504	CC-NBS-LRR resistance protein	Medtr8g028500.1_Rpp4C1_HC_chr8:10848011-10860059_20140818
38.4829	1.89541	7.78e-05	0.00320276	MSTRG.55542.2	507	---NA---	---NA---
61.9414	1.8949	0.000154381	0.00530901	MSTRG.72582.1	264	---NA---	---NA---
108.308	1.89435	2.17e-06	0.000208654	168682_t	2349	LRR and NB-ARC domain disease resistance protein	Medtr7g018810.1_LRR_and_NB-ARC_domain_disease_resistance_protein,_putative_LC_chr7:6211389-6206309_20140818
38.3002	1.89406	2.74e-05	0.00147857	MSTRG.55544.1	481	---NA---	---NA---
597.423	1.89383	6.2e-10	2.52e-07	153996_t	1440	putative E3 ubiquitin-protein ligase XBAT31	Medtr4g021880.1_E3_ubiquitin-protein_ligase_XBAT31-like_protein_HC_chr4:7349291-7344609_20140818
81.2164	1.89362	1.17e-07	2.01e-05	186883_t	858	transmembrane protein, putative	Medtr8g066860.1_transmembrane_protein,_putative_LC_chr8:27838280-27839611_20140818
54.0769	1.89317	1.35e-07	2.25e-05	MSTRG.18378.1	691	---NA---	---NA---
64.0815	1.89262	2.58e-05	0.00140498	MSTRG.15718.1	3018	receptor-like kinase feronia-like protein	Medtr7g015230.1_receptor-like_kinase_feronia-like_protein_LC_chr7:4632007-4629356_20140818
53.7895	1.89238	1.04e-05	0.000696261	MSTRG.48027.1	369	---NA---	---NA---
34.2372	1.8921	4.88e-05	0.00227279	MSTRG.9816.3	562	zinc finger protein 511	Medtr7g029090.1_C2H2-type_zinc_finger_protein_HC_chr7:10180279-10181778_20140818
57.8519	1.89186	0.00127312	0.023726	MSTRG.38587.1	553	---NA---	---NA---
340.021	1.89138	3.48e-08	7.3e-06	MSTRG.23399.3	897	---NA---	---NA---
68.6899	1.89128	0.00253837	0.0379804	MSTRG.58712.2	2704	F-box/RNI/FBD-like domain protein	Medtr7g087840.1_F-box/FBD/LRR_protein_LC_chr7:34145858-34152025_20140818
301.521	1.89065	0.000206633	0.00655314	MSTRG.76402.5	784	glycoside hydrolase family 1 protein	Medtr4g016920.2_glycoside_hydrolase_family_1_protein_HC_chr4:5220628-5215987_20140818
50.9367	1.89043	0.00226533	0.0351758	MSTRG.818.1	567	---NA---	---NA---
153.573	1.88928	2.36e-06	0.000221009	MSTRG.63965.12	1644	hypothetical protein MTR_4g039945	Medtr5g010555.1_hypothetical_protein_HC_chr5:2852736-2852280_20140818
1181.33	1.88842	4.44e-05	0.00211508	112615_t	1290	extracellular dermal glycoprotein	Medtr2g022490.1_extracellular_dermal_glycoprotein_HC_chr2:7775469-7773555_20140818
38.7124	1.88825	0.000709762	0.0158258	MSTRG.66882.1	729	---NA---	---NA---
44.8346	1.88764	0.00300108	0.0425063	MSTRG.56713.7	371	187-kDa microtubule-associated protein AIR9	Medtr2g048210.1_outer_arm_dynein_light_chain_1_HC_chr2:21236166-21209346_20140818
80.2483	1.88752	0.000140911	0.00496367	MSTRG.42929.2	1996	cyclic nucleotide gated channel protein	Medtr6g075390.1_cyclic_nucleotide_gated_channel_protein_HC_chr6:27995366-28001759_20140818
246.516	1.88744	3.38e-10	1.55e-07	MSTRG.16647.4	5292	NB-ARC domain disease resistance protein	Medtr5g070960.1_disease_resistance_protein_RGA4_HC_chr5:30062044-30058913_20140818
431.406	1.88412	1.03e-06	0.000115098	1546_t	498	PB1 domain protein	Medtr5g032960.1_PB1_domain_protein_HC_chr5:14201643-14199883_20140818
87.1257	1.8829	2.21e-07	3.38e-05	MSTRG.55898.2	224	aspartic protease family protein, putative	Medtr5g080330.1_aspartic_protease_family_protein,_putative_LC_chr5:34380900-34377963_20140818
126.862	1.88261	2.91e-12	2.46e-09	188751_t	1449	WD repeat-containing protein LWD1	Medtr7g084810.1_transducin/WD-like_repeat-protein_HC_chr7:32739181-32737587_20140818
368.648	1.88066	1.68e-09	6.02e-07	MSTRG.13365.5	1997	replication factor-A carboxy-terminal domain protein	Medtr1g105785.1_replication_factor-A_carboxy-terminal_domain_protein_HC_chr1:47732917-47735741_20140818
75.2844	1.88054	4.02e-05	0.00196864	MSTRG.76008.1	757	hypothetical protein MTR_3g010277	Medtr3g010277.1_hypothetical_protein_LC_chr3:2387796-2386193_20140818
62.9653	1.88006	8.16e-07	9.67e-05	MSTRG.87750.2	500	hypothetical protein MTR_0044s0250	Medtr0044s0250.1_hypothetical_protein_LC_scaffold0044:70407-70643_20140818
43.3138	1.8793	1.56e-05	0.000960525	MSTRG.39415.10	806	cysteine-rich receptor-like kinase	Medtr8g041880.1_cysteine-rich_receptor-like_kinase_HC_chr8:15802331-15798924_20140818
747.601	1.87823	0.000658047	0.0150031	MSTRG.69872.1	283	---NA---	---NA---
51.4187	1.87736	0.00195546	0.0318118	MSTRG.87921.1	210	---NA---	Medtr7g010570.1_hypothetical_protein_LC_chr7:2630928-2632452_20140818
876.923	1.87721	0.000673302	0.015261	MSTRG.73426.5	2480	---NA---	---NA---
43.9177	1.87686	0.00133669	0.0244778	99727_t	3873	Retrovirus-related Pol polyprotein from transposon TNT 1-94	Medtr3g093120.1_SPFH_domain/band_7_family_protein_LC_chr3:42570339-42574091_20140818
172.268	1.87657	7.22e-06	0.000522293	MSTRG.52286.2	1028	isoaspartyl peptidase/L-asparaginase	Medtr4g109900.1_isoaspartyl_peptidase/L-asparaginase_HC_chr4:45733594-45731329_20140818
54.9497	1.87424	3.46e-06	0.000296877	MSTRG.87583.2	990	---NA---	Medtr1g085600.1_hypothetical_protein_HC_chr1:38240615-38237478_20140818
135.48	1.87266	1.44e-06	0.000149866	MSTRG.81365.3	653	hypothetical protein MTR_6g463490	Medtr6g463490.1_hypothetical_protein_LC_chr6:22015768-22016240_20140818
231.694	1.8715	5.51e-08	1.08e-05	MSTRG.86196.2	2062	global transcription factor	Medtr7g088700.1_global_transcription_factor_HC_chr7:34591539-34580098_20140818
198.156	1.8711	1.13e-05	0.000740049	MSTRG.52933.10	1854	glycoside hydrolase family 79 amino-terminal domain protein	Medtr4g109300.1_glycoside_hydrolase_family_79_amino-terminal_domain_protein_HC_chr4:45387586-45390508_20140818
261.905	1.87037	1.66e-07	2.66e-05	MSTRG.34377.1	2136	MACPF domain-containing protein At4g24290-like	Medtr8g095110.1_MACPF_domain_protein_HC_chr8:39775166-39778281_20140818
64.5433	1.8692	0.000423273	0.0110076	MSTRG.4234.2	1042	proton pump interactor, putative	Medtr2g090520.2_proton_pump_interactor,_putative_HC_chr2:38632503-38635088_20140818
44.8212	1.86873	0.00180064	0.0301121	MSTRG.18835.2	254	---NA---	---NA---
58.6768	1.86808	2.37e-05	0.00131554	MSTRG.15948.1	2688	receptor-like protein	Medtr6g038910.1_receptor-like_protein,_putative_LC_chr6:14017566-14014280_20140818
208.691	1.86764	4.9e-07	6.41e-05	MSTRG.7049.2	2875	replication factor-A carboxy-terminal domain protein	Medtr7g110100.1_replication_factor-A_carboxy-terminal_domain_protein_HC_chr7:45127464-45130150_20140818
268.463	1.86535	0.00117439	0.0225033	MSTRG.30446.4	1133	H+-transporting two-sector ATPase, alpha/beta subunit, central region, related	Medtr3g065700.1_hypothetical_protein_HC_chr3:29684619-29685533_20140818
60.9273	1.86407	1.11e-05	0.000731203	MSTRG.2581.10	825	SEC14 cytosolic factor family protein	Medtr4g013300.1_SEC14_cytosolic_factor_family_protein_HC_chr4:3713580-3710569_20140818
198.372	1.86366	2.82e-05	0.00151	MSTRG.88367.2	5076	modifier OF SNC1 1, putative	Medtr3g077440.1_modifier_OF_SNC1_1,_putative_HC_chr3:34767661-34777932_20140818
38.258	1.86315	0.000146546	0.00510298	MSTRG.78631.1	885	---NA---	---NA---
56.4006	1.86298	3.61e-05	0.0018247	MSTRG.63965.10	1960	hypothetical protein MTR_4g039945	Medtr5g010555.1_hypothetical_protein_HC_chr5:2852736-2852280_20140818
101.669	1.86183	9.73e-06	0.000659915	93209_t	1359	UDP-glucosyltransferase family protein	Medtr5g072820.1_UDP-glucosyltransferase_family_protein_HC_chr5:30989979-30993244_20140818
34.105	1.86125	0.00219385	0.0344144	MSTRG.46938.3	661	haloacid dehalogenase-like hydrolase domain-containing protein At3g48420	Medtr3g075230.1_haloacid_dehalogenase-like_hydrolase_HC_chr3:34240288-34237032_20140818
129.54	1.86078	8.61e-07	0.000100856	MSTRG.50442.1	1316	S-adenosylmethionine-dependent methyltransferase	Medtr7g090180.1_S-adenosylmethionine-dependent_methyltransferase_HC_chr7:35398677-35400589_20140818
163.565	1.85998	8.79e-09	2.4e-06	MSTRG.27521.11	1479	65-kDa microtubule-associated protein 1	Medtr5g093860.1_microtubule_associated_protein,_MAP65/ASE1_family_protein_HC_chr5:40981176-40985866_20140818
198.435	1.85822	5.94e-07	7.48e-05	138950_t	333	ABA/WDS induced protein	Medtr6g037220.1_ABA/WDS_induced_protein_HC_chr6:13090285-13088621_20140818
388.99	1.85681	4.98e-06	0.000391941	MSTRG.86213.5	256	---NA---	---NA---
102.951	1.85675	1.14e-07	1.98e-05	MSTRG.45033.1	816	transmembrane protein, putative	Medtr8g020470.3_transmembrane_protein,_putative_LC_chr8:7181240-7185722_20140818
94.5773	1.85637	4.63e-06	0.0003708	MSTRG.86196.6	1674	tyrosine specific protein phosphatase family protein	Medtr4g132810.1_tyrosine_specific_protein_phosphatase_family_protein_HC_chr4:55548045-55544901_20140818
597.629	1.85617	9.47e-09	2.55e-06	MSTRG.4874.1	287	---NA---	---NA---
49.3642	1.85603	2.19e-05	0.00123429	119249_t	1263	cyclin-dependent kinase	Medtr6g087920.1_cyclin-dependent_kinase_HC_chr6:33090968-33087459_20140818
198.114	1.85376	3.2e-09	1.04e-06	142875_t	300	---NA---	---NA---
49.221	1.85318	0.000109799	0.00413574	MSTRG.10868.2	678	Lipid transfer protein	Medtr1g103490.1_Lipid_transfer_protein_HC_chr1:46837798-46839766_20140818
61.8731	1.85219	7.32e-08	1.37e-05	MSTRG.77108.2	2446	FAD/NAD(P)-binding oxidoreductase family protein	Medtr3g085660.1_FAD/NAD(P)-binding_oxidoreductase_family_protein_HC_chr3:38751810-38758033_20140818
55.1857	1.85188	4.61e-05	0.00217706	53438_t	1164	transmembrane protein, putative	Medtr5g036520.1_transmembrane_protein,_putative_LC_chr5:15935958-15934992_20140818
171.077	1.85093	3.85e-05	0.00191039	MSTRG.63965.1	1638	hypothetical protein MTR_4g039945	Medtr5g010555.1_hypothetical_protein_HC_chr5:2852736-2852280_20140818
55.5814	1.85085	0.000379528	0.0101796	5905_t	333	---NA---	Medtr4g048070.1_succinate_dehydrogenase_subunit_3_HC_chr4:16983359-16977425_20140818
46.2361	1.8489	0.00147198	0.0262178	MSTRG.59510.1	229	---NA---	---NA---
148.534	1.84618	4.12e-07	5.56e-05	153813_t	399	late embryogenesis abundant protein Lea5	Medtr4g120040.1_late_embryogenesis_abundant_protein_HC_chr4:49759382-49760884_20140818
115.839	1.84609	0.000268758	0.00791419	MSTRG.42929.1	2679	probable cyclic nucleotide-gated ion channel 20, chloroplastic isoform X1	Medtr6g075440.1_cyclic_nucleotide_gated_channel_protein_HC_chr6:28025576-28036424_20140818
86.1359	1.84427	0.00231589	0.0357175	188429_t	804	hypothetical protein MTR_5g073090	Medtr5g073090.1_hypothetical_protein_HC_chr5:31099060-31100828_20140818
83.1825	1.84403	0.001313	0.0242186	MSTRG.25864.2	1487	protein BEARSKIN2-like	Medtr4g035590.1_NAC_transcription_factor-like_protein_HC_chr4:12274680-12278280_20140818
53.4554	1.84367	0.00103632	0.0206387	MSTRG.65560.1	383	---NA---	---NA---
70.1318	1.8429	0.00017568	0.00583422	MSTRG.8829.18	1695	Transcription factor bHLH30	Medtr2g091190.1_transcription_factor_bHLH107-like_protein_HC_chr2:39333518-39331127_20140818
46.1202	1.84234	0.00303717	0.0428412	MSTRG.48738.2	485	---NA---	---NA---
68.5033	1.84208	2.73e-06	0.000247135	MSTRG.26426.2	540	F-box protein interaction domain protein	Medtr3g010590.1_F-box_protein_interaction_domain_protein_LC_chr3:2491125-2496268_20140818
926.955	1.8403	0.00118242	0.0226151	MSTRG.73426.4	2508	---NA---	---NA---
44.4179	1.84014	0.00015296	0.00526832	49476_t	735	accelerated cell death 11	Medtr2g030530.1_glycolipid_transfer_protein_HC_chr2:11516969-11519281_20140818
236.161	1.84004	2.05e-10	1.03e-07	MSTRG.63173.11	3374	NB-ARC domain disease resistance protein	Medtr3g466620.1_NB-ARC_domain_disease_resistance_protein_LC_chr3:27403732-27400482_20140818
39.8756	1.83843	0.00102895	0.0205396	MSTRG.37845.1	680	glycoside hydrolase family 1 protein	Medtr4g016920.1_glycoside_hydrolase_family_1_protein_HC_chr4:5221708-5216027_20140818
272.991	1.83798	5.45e-07	6.96e-05	MSTRG.13045.3	372	---NA---	---NA---
47.0396	1.83721	0.000616475	0.0143101	MSTRG.42375.1	1074	NADH-ubiquinone oxidoreductase chain 1	Medtr0057s0200.1_Ulp1_protease_family,_carboxy-terminal_domain_protein_HC_scaffold0057:78912-78633_20140818
38.7968	1.83678	0.000327378	0.00913668	MSTRG.44572.1	235	---NA---	---NA---
500.112	1.83556	0.000909917	0.0188937	MSTRG.73426.2	773	---NA---	---NA---
203.308	1.83473	0.000122773	0.00449225	MSTRG.30761.3	2023	calcium-dependent protein kinase 20-like	Medtr1g054865.1_calmodulin-domain_kinase_CDPK_protein_HC_chr1:24041840-24046332_20140818
51.0677	1.83138	5.93e-05	0.00262895	MSTRG.73290.1	293	---NA---	---NA---
57.0937	1.83134	1.6e-05	0.00097493	MSTRG.22616.5	276	RNA-binding (RRM/RBD/RNP motif) family protein	Medtr4g070140.1_RNA-binding_(RRM/RBD/RNP_motif)_family_protein_LC_chr4:26401562-26402849_20140818
85.9082	1.83085	0.00243013	0.0369256	MSTRG.24590.1	2163	transmembrane protein, putative	Medtr1g105765.1_transmembrane_protein,_putative_HC_chr1:47722495-47723773_20140818
47.7973	1.8297	0.000301208	0.00860479	MSTRG.4521.7	907	Transcription factor bHLH30	Medtr2g091190.1_transcription_factor_bHLH107-like_protein_HC_chr2:39333518-39331127_20140818
34.9833	1.82841	0.00183216	0.0304584	MSTRG.21690.1	291	stress up-regulated Nod 19 protein	Medtr4g094550.1_stress_up-regulated_Nod_19_protein_HC_chr4:38222122-38219238_20140818
229.471	1.82831	9.46e-06	0.000645349	MSTRG.62629.2	844	DnaJ-class molecular chaperone	Medtr2g087660.1_DnaJ-class_molecular_chaperone_HC_chr2:36877846-36880571_20140818
88.8833	1.82756	6.4e-15	1.11e-11	MSTRG.1142.17	2396	probable myosin-binding protein 5	Medtr0168s0060.1_zein-binding_protein_HC_scaffold0168:18855-21061_20140818
83.7289	1.82749	3.07e-05	0.00161194	179579_t	5820	Ty3/gypsy retrotransposon protein	Medtr8g079940.1_two-component_response_regulator_ARR2-like_protein_HC_chr8:34314993-34318731_20140818
51.2193	1.8259	0.00039343	0.0104458	61689_t	4287	disease resistance protein (TIR-NBS-LRR class)	Medtr6g079140.1_disease_resistance_protein_(TIR-NBS-LRR_class)_HC_chr6:29804255-29799693_20140818
114.619	1.82579	4.06e-05	0.00198279	56166_t	4416	disease resistance protein (TIR-NBS-LRR class)	Medtr5g090940.1_disease_resistance_protein_(TIR-NBS-LRR_class)_HC_chr5:39619088-39625198_20140818
72.8202	1.82388	0.00035288	0.009652	MSTRG.49151.7	606	nucleosome/chromatin assembly factor group protein	Medtr4g073080.1_nucleosome/chromatin_assembly_factor_group_protein_HC_chr4:27640107-27642823_20140818
427.893	1.82182	1.01e-12	1.01e-09	173574_t	510	ATP synthase 6 kDa subunit	Medtr4g063080.1_ATP_synthase_6_kDa_subunit_HC_chr4:23334667-23336937_20140818
242.573	1.82165	0.00117143	0.0224827	MSTRG.63859.1	375	---NA---	---NA---
35.8473	1.82123	4.19e-05	0.00202712	MSTRG.82642.3	2161	L-aspartate oxidase, chloroplastic	Medtr6g007070.1_L-aspartate_oxidase_HC_chr6:1399109-1404540_20140818
109.234	1.82055	1.14e-07	1.98e-05	MSTRG.75978.1	320	hypothetical protein MTR_3g026785	Medtr3g026785.1_hypothetical_protein_HC_chr3:8251194-8250863_20140818
122.602	1.81988	0.00013659	0.0048434	MSTRG.84639.2	1491	probable protein phosphatase 2C 11	Medtr1g115570.1_protein_phosphatase_2C-like_protein_HC_chr1:52256072-52260436_20140818
83.3634	1.81874	0.00270127	0.0396218	MSTRG.59518.1	890	hypothetical protein MTR_5g073090	Medtr5g073090.1_hypothetical_protein_HC_chr5:31099060-31100828_20140818
122.585	1.81838	9.05e-06	0.00062324	MSTRG.63173.3	7098	cysteine-rich receptor-like protein kinase	Medtr3g466590.1_hypothetical_protein_LC_chr3:27376193-27381419_20140818
111.803	1.81821	3.92e-07	5.32e-05	MSTRG.63173.9	3732	NB-ARC domain disease resistance protein	Medtr3g466620.1_NB-ARC_domain_disease_resistance_protein_LC_chr3:27403732-27400482_20140818
40.3295	1.81595	7.32e-06	0.000528427	MSTRG.64760.3	678	PPR containing plant-like protein	Medtr8g066250.1_PPR_containing_plant-like_protein_HC_chr8:27517637-27514893_20140818
55.0996	1.81524	9.29e-05	0.00366029	MSTRG.45046.4	1152	XIAP-associated factor 1	Medtr3g111440.2_TRAF-type_zinc_finger_protein_HC_chr3:52079851-52077503_20140818
83.9688	1.81505	5.03e-05	0.00232582	86808_t	1407	Cytochrome cd1-nitrite reductase-like, C-terminal haem d1	Medtr7g451160.1_hypothetical_protein_LC_chr7:17166883-17166125_20140818
79.5914	1.81318	2.96e-05	0.00156928	86807_t	1965	histone-lysine N-methyltransferase 2C-like	Medtr3g005755.1_deoxycytidylate_deaminase_(cytidine_deaminase),_putative_LC_chr3:367590-366620_20140818
61.0454	1.813	0.00113898	0.0220292	MSTRG.71811.1	284	---NA---	---NA---
89.092	1.81254	2.65e-05	0.00143694	MSTRG.2581.14	1238	Poly [ADP-ribose] polymerase 3	Medtr4g053530.1_poly(ADP-ribose)_polymerase_domain_protein_HC_chr4:19342499-19346920_20140818
90.5916	1.81251	1.29e-07	2.17e-05	62961_t	312	Histone domain-containing protein	Medtr8g038460.1_histone_H4_domain_protein_HC_chr8:14261400-14260862_20140818
102.512	1.81079	2.35e-06	0.000220082	MSTRG.11056.1	327	mitochondrial import receptor subunit TOM5 homolog	Medtr4g109610.1_import_receptor_subunit_TOM5-like_protein_HC_chr4:45564704-45562196_20140818
59.6469	1.81045	0.00232085	0.0357726	157573_t	3813	LRR and NB-ARC domain disease resistance protein	Medtr3g435720.1_LRR_and_NB-ARC_domain_disease_resistance_protein_LC_chr3:11768604-11772545_20140818
66.2916	1.80938	0.000282798	0.00821672	MSTRG.53236.1	425	SNF2 family amino-terminal protein	Medtr4g118720.1_SNF2_family_amino-terminal_protein_HC_chr4:49190490-49169826_20140818
71.6492	1.80929	0.000924781	0.0191102	MSTRG.48738.1	453	transmembrane protein, putative	Medtr4g098700.1_transmembrane_protein,_putative_LC_chr4:40695499-40694571_20140818
37.352	1.80908	0.00022856	0.00704514	95500_t	2073	wall-associated receptor kinase-like protein	Medtr3g088760.1_wall-associated_receptor_kinase-like_protein_LC_chr3:40577145-40580500_20140818
76.6885	1.80777	6.49e-08	1.23e-05	MSTRG.45470.2	931	---NA---	Medtr3g048970.1_transmembrane_protein,_putative_HC_chr3:18203855-18205353_20140818
1682.57	1.80744	7.75e-14	1.02e-10	MSTRG.48352.1	1060	aluminum induced protein with YGL and LRDR motif protein	Medtr2g022520.1_aluminum_induced_protein_with_YGL_and_LRDR_motif_protein_HC_chr2:7790362-7796721_20140818
35.2512	1.80676	0.000619645	0.0143662	MSTRG.68414.6	598	kinase family protein, putative	Medtr1g051310.1_kinase_family_protein,_putative_HC_chr1:20088196-20089024_20140818
101.886	1.80388	4.75e-06	0.000377437	MSTRG.18504.7	634	nucleotide exchange factor SIL1	Medtr3g080080.1_nucleotide_exchange_factor_SIL1_HC_chr3:36220203-36216221_20140818
68.063	1.80353	8.58e-05	0.00344811	MSTRG.44802.6	573	MAP kinase-binding-like protein	Medtr7g066750.1_MAP_kinase-binding-like_protein_HC_chr7:24342725-24336872_20140818
61.3264	1.80276	0.00122991	0.0231654	MSTRG.59056.6	1644	transmembrane protein, putative	Medtr2g035720.1_transmembrane_protein,_putative_LC_chr2:15143683-15144876_20140818
1294.55	1.80255	5.52e-09	1.64e-06	MSTRG.82333.1	2422	plant/F10M23-360 protein	Medtr5g036420.1_plant/F10M23-360_protein_HC_chr5:15875140-15868742_20140818
201.152	1.80153	1.73e-05	0.00104059	MSTRG.62629.1	1035	DnaJ-class molecular chaperone	Medtr2g087660.1_DnaJ-class_molecular_chaperone_HC_chr2:36877846-36880571_20140818
113.625	1.80131	2.47e-08	5.57e-06	MSTRG.3250.1	654	hypothetical protein TSUD_215660	hypothetical protein TSUD_215660
67.8791	1.80103	0.0002852	0.00826991	MSTRG.38628.1	2683	hypothetical protein TSUD_158760	Medtr2g092960.1_Myb/SANT-like_DNA-binding_domain_protein_LC_chr2:39569693-39563388_20140818
54.4699	1.80087	8.37e-07	9.86e-05	MSTRG.76015.2	1050	unknown	Medtr2g055850.1_DEAD-box_ATP-dependent_RNA_helicase-like_protein_HC_chr2:23956977-23948909_20140818
198.616	1.80036	1.81e-10	9.45e-08	142880_t	3054	NB-ARC domain disease resistance protein	Medtr5g070960.1_disease_resistance_protein_RGA4_HC_chr5:30062044-30058913_20140818
52.4965	1.79968	0.00347164	0.0468619	MSTRG.37071.3	1055	MAP kinase kinase	Medtr6g005210.1_MAP_kinase_kinase_HC_chr6:656528-650537_20140818
72.0449	1.79622	0.000461832	0.0116794	MSTRG.59056.4	1931	transmembrane protein, putative	Medtr2g035720.1_transmembrane_protein,_putative_LC_chr2:15143683-15144876_20140818
46.2129	1.79599	6.07e-05	0.00267168	MSTRG.41913.5	230	---NA---	---NA---
79.9911	1.79507	0.0011583	0.0222969	MSTRG.81868.3	894	RNA polymerase II transcriptional coactivator KIWI	Medtr3g096690.1_RNA_polymerase_II_transcriptional_coactivator_HC_chr3:44248657-44250867_20140818
66.3376	1.79381	9.13e-08	1.65e-05	MSTRG.77108.1	2887	FAD/NAD(P)-binding oxidoreductase family protein	Medtr3g085660.1_FAD/NAD(P)-binding_oxidoreductase_family_protein_HC_chr3:38751810-38758033_20140818
123.29	1.79319	1.82e-06	0.00018194	MSTRG.22719.2	669	dolichyl-diphosphooligosaccharide--protein glycosyltransferase subunit DAD1	Medtr3g023120.1_defender_against_apoptotic_death-like_protein_HC_chr3:6985226-6981467_20140818
760.878	1.79308	1.36e-09	5.02e-07	27776_t	777	short-chain type dehydrogenase/reductase-like protein	Medtr7g094520.1_short-chain_dehydrogenase/reductase_HC_chr7:37629739-37628446_20140818
32.8426	1.78798	0.000527825	0.0128028	MSTRG.42914.2	1909	disease resistance protein (TIR-NBS-LRR class)	Medtr6g069560.1_disease_resistance_protein_(TIR-NBS-LRR_class)_LC_chr6:25071428-25077838_20140818
91.0977	1.78759	1.54e-07	2.52e-05	MSTRG.35702.3	664	carbohydrate-binding X8 domain protein	Medtr5g044530.1_carbohydrate-binding_X8_domain_protein_HC_chr5:19551318-19554463_20140818
83.2726	1.78736	4.56e-05	0.00215854	MSTRG.43840.2	372	---NA---	---NA---
182.934	1.78708	2.74e-06	0.000247482	MSTRG.27488.4	10537	CC-NBS-LRR resistance protein	Medtr8g028500.1_Rpp4C1_HC_chr8:10848011-10860059_20140818
1237.47	1.78551	8.29e-09	2.3e-06	MSTRG.82333.2	2362	plant/F10M23-360 protein	Medtr5g036420.1_plant/F10M23-360_protein_HC_chr5:15875140-15868742_20140818
31.675	1.78435	0.000941257	0.0193448	166392_t	5967	PREDICTED: uncharacterized protein LOC104894399	Medtr8g463500.1_hypothetical_protein_LC_chr8:22359101-22360522_20140818
297.937	1.78406	6.32e-07	7.83e-05	MSTRG.32847.4	1694	cysteine synthase-like isoform X1	Medtr1g081620.1_O-acetylserine_(thiol)_lyase_HC_chr1:36280172-36284490_20140818
368.523	1.78357	0.000442454	0.0113319	MSTRG.89080.4	497	---NA---	Medtr3g016080.1_transmembrane_protein,_putative_LC_chr3:4763213-4761952_20140818
88.4952	1.77659	0.000915874	0.0189716	MSTRG.49655.3	1695	digestive organ expansion factor-like protein	Medtr3g083080.1_hypothetical_protein_LC_chr3:37492599-37493407_20140818
811.718	1.7762	3.73e-05	0.00186709	MSTRG.49177.1	272	hypothetical protein CQW23_33210	Medtr0052s0070.1_senescence-associated_protein_HC_scaffold0052:21398-28183_20140818
66.5886	1.77562	0.000492318	0.0122033	MSTRG.48148.6	629	structural constituent of ribosome protein, putative	Medtr2g021040.2_structural_constituent_of_ribosome_protein,_putative_HC_chr2:7107810-7113276_20140818
32.9026	1.77473	0.00288037	0.0414076	MSTRG.11624.1	491	TPX2 (targeting protein for Xklp2) family protein	Medtr1g075310.1_TPX2_(targeting_protein_for_Xklp2)_family_protein_HC_chr1:33342141-33338595_20140818
137.081	1.77265	1.24e-08	3.15e-06	MSTRG.21005.1	4016	RAB6A-GEF complex partner protein 1-like	Medtr7g078170.1_RIC1-like_protein_HC_chr7:29558486-29569548_20140818
49.4559	1.77205	0.00221935	0.0346608	MSTRG.43798.1	2434	WNK kinase	Medtr8g093090.1_WNK_kinase_HC_chr8:38904786-38908148_20140818
67.3878	1.77119	1.7e-05	0.00102629	MSTRG.43441.1	478	---NA---	---NA---
71.7369	1.77086	1.02e-05	0.000684584	MSTRG.52220.1	1979	hypothetical protein MTR_5g013600	Medtr5g013600.1_hypothetical_protein_HC_chr5:4354594-4357457_20140818
154.397	1.77076	8.05e-07	9.55e-05	MSTRG.81365.2	677	hypothetical protein MTR_6g463490	Medtr6g463490.1_hypothetical_protein_LC_chr6:22015768-22016240_20140818
58.4337	1.77057	2.12e-05	0.00120553	MSTRG.37281.1	887	phytohormone-binding protein-like	Medtr3g055130.1_pathogenesis-related_protein_bet_V_I_family_protein_HC_chr3:21661924-21660763_20140818
407.282	1.7702	1.12e-06	0.000123289	MSTRG.39567.3	1178	probable WRKY transcription factor 50	Medtr1g015140.1_WRKY_family_transcription_factor_HC_chr1:3734958-3734089_20140818
40.841	1.76738	0.0035538	0.0476339	MSTRG.15517.1	315	---NA---	Medtr7g062720.1_Copia-like_polyprotein/retrotransposon,_putative_LC_chr7:22824311-22825240_20140818
42.8422	1.76721	0.000201707	0.00645041	MSTRG.12059.4	1306	cysteine-rich RLK (receptor-like kinase) protein	Medtr8g052420.1_cysteine-rich_RLK_(receptor-like_kinase)_protein_LC_chr8:19504888-19499824_20140818
66.4372	1.76605	9.69e-05	0.00378148	162448_t	1779	PREDICTED: uncharacterized protein LOC100807274 isoform X1	Medtr2g092960.1_Myb/SANT-like_DNA-binding_domain_protein_LC_chr2:39569693-39563388_20140818
47.1718	1.76447	1.65e-05	0.00100358	MSTRG.49139.8	1276	F-box/RNI/FBD-like domain protein	Medtr2g083840.1_F-box/RNI/FBD-like_domain_protein_LC_chr2:35190136-35186020_20140818
75.24	1.76428	0.00166509	0.0286084	MSTRG.65869.2	1347	tRNA-splicing endonuclease subunit sen54 amino-terminal protein	Medtr8g090105.1_tRNA-splicing_endonuclease_subunit_sen54_amino-terminal_protein_HC_chr8:37741275-37738113_20140818
32.7134	1.76426	0.0014149	0.0255269	MSTRG.36325.1	284	---NA---	---NA---
102.914	1.76203	0.00338668	0.0461493	MSTRG.6029.1	1870	toll-interleukin-resistance (TIR) domain protein	Medtr6g036510.1_toll-interleukin-resistance_(TIR)_domain_protein_LC_chr6:12786739-12784326_20140818
266.924	1.76196	0.00131029	0.0241823	MSTRG.30761.1	2198	calcium-dependent protein kinase 20-like	Medtr1g054865.1_calmodulin-domain_kinase_CDPK_protein_HC_chr1:24041840-24046332_20140818
55.5347	1.75674	0.000488856	0.0121447	MSTRG.21776.3	1054	unknown	Medtr3g005890.1_hypothetical_protein_LC_chr3:429035-430098_20140818
47.7881	1.75596	0.000570479	0.0135365	103839_t	411	hypothetical protein MTR_6g004010	Medtr6g004010.1_hypothetical_protein_HC_chr6:65902-63406_20140818
73.0255	1.75553	1.6e-05	0.000975855	MSTRG.89425.1	637	---NA---	---NA---
3198.47	1.75266	1.3e-14	2.04e-11	MSTRG.32696.5	616	hypothetical protein MTR_7g065130	Medtr7g065130.1_hypothetical_protein_HC_chr7:23733151-23734236_20140818
43.341	1.75225	0.000213556	0.00671629	MSTRG.4234.5	1524	proton pump interactor, putative	Medtr2g090520.2_proton_pump_interactor,_putative_HC_chr2:38632503-38635088_20140818
42.4826	1.74916	5.02e-05	0.0023233	MSTRG.49871.1	388	F-box/RNI/FBD-like domain protein	Medtr2g008320.1_F-box/RNI/FBD-like_domain_protein_LC_chr2:1401961-1404001_20140818
52.576	1.74809	0.00380133	0.0498106	MSTRG.51976.1	399	hypothetical protein MTR_5g024973	Medtr5g024973.1_hypothetical_protein_LC_chr5:10100787-10101374_20140818
64.2675	1.74646	6.1e-05	0.002681	MSTRG.84045.1	2478	DEAD-box ATP-dependent RNA helicase-like protein	Medtr7g076820.1_DEAD-box_ATP-dependent_RNA_helicase-like_protein_HC_chr7:28990557-28982494_20140818
40.3266	1.74622	2.85e-05	0.00152081	MSTRG.82634.3	1279	50S ribosomal protein L3-2, chloroplastic	Medtr6g006970.1_50S_ribosomal_protein_L3P_HC_chr6:1316494-1310518_20140818
47.0659	1.74445	0.000726477	0.0160966	MSTRG.59056.2	1615	transmembrane protein, putative	Medtr2g035720.1_transmembrane_protein,_putative_LC_chr2:15143683-15144876_20140818
85.7517	1.74294	1.34e-05	0.000854401	MSTRG.79559.4	569	ankyrin repeat plant-like protein	Medtr0470s0020.1_ankyrin_repeat_plant-like_protein_LC_scaffold0470:10687-11436_20140818
49.097	1.74238	0.00214764	0.0338734	MSTRG.38506.6	2463	zinc finger BED domain-containing protein RICESLEEPER 2-like	Medtr3g098650.2_glycoside_hydrolase_family_38_amino-terminal_domain_protein_chr3:45068920-45061132_20140818
50.7997	1.74122	0.000988559	0.019996	MSTRG.25453.1	453	---NA---	---NA---
125.037	1.73985	0.000453268	0.0115363	MSTRG.25312.5	2076	disease resistance protein (TIR-NBS-LRR class)	Medtr4g020700.2_disease_resistance_protein_(TIR-NBS-LRR_class)_LC_chr4:6645805-6656127_20140818
408.825	1.73961	1.99e-11	1.37e-08	MSTRG.73880.3	3891	disease resistance protein (TIR-NBS-LRR class)	Medtr1g007300.1_disease_resistance_protein_(TIR-NBS-LRR_class)_LC_chr1:268696-264988_20140818
51.6701	1.73917	1.02e-05	0.000683631	MSTRG.2023.1	485	---NA---	---NA---
226.619	1.73908	3.27e-05	0.00169107	MSTRG.59343.13	1514	NAD(P)H-dependent 6'-deoxychalcone synthase-like	Medtr3g083130.1_aldo/keto_reductase_family_oxidoreductase_HC_chr3:37505830-37503715_20140818
182.012	1.7383	0.000112645	0.00421518	MSTRG.77557.1	2085	serine/threonine-protein phosphatase 7 long form homolog	Medtr3g011100.1_F-box_and_associated_interaction_domain_protein_HC_chr3:2698683-2696484_20140818
638.105	1.73738	1.76e-14	2.7e-11	MSTRG.37201.4	327	octicosapeptide/phox/Bem1p family protein	Medtr1g109470.1_octicosapeptide/phox/Bem1p_family_protein_HC_chr1:49509995-49513014_20140818
84.9622	1.7372	7.44e-06	0.000535306	MSTRG.81864.2	1782	CD2 antigen cytoplasmic tail-binding-like protein	Medtr2g008810.1_CD2_antigen_cytoplasmic_tail-binding-like_protein_HC_chr2:1625137-1630690_20140818
430.947	1.73536	2.18e-11	1.47e-08	MSTRG.73880.1	3916	disease resistance protein (TIR-NBS-LRR class)	Medtr6g071935.1_NB-ARC_domain_protein_LC_chr6:26646248-26651415_20140818
40.5274	1.73368	0.00289252	0.0415182	MSTRG.84374.6	844	DNA replication factor CDT1-like protein	Medtr6g077680.2_DNA_replication_factor_CDT1-like_protein_LC_chr6:29816107-29811850_20140818
41.1031	1.73281	0.000449423	0.0114704	22281_t	1397	putative disease resistance protein At3g14460 isoform X1	Medtr5g095910.1_LRR_and_NB-ARC_domain_disease_resistance_protein_HC_chr5:41932381-41936151_20140818
96.3831	1.73037	1.05e-11	7.62e-09	MSTRG.1142.11	2437	probable myosin-binding protein 5	Medtr0168s0060.1_zein-binding_protein_HC_scaffold0168:18855-21061_20140818
52.5166	1.73032	0.000210863	0.00665326	MSTRG.85792.3	1645	Dil domain myosin family protein	Medtr1g080600.1_Dil_domain_myosin_family_protein_HC_chr1:35834916-35819927_20140818
100.6	1.72887	1.05e-08	2.78e-06	192904_t	2076	mitochondrial phosphate carrier protein 1, mitochondrial-like	Medtr4g094578.1_phosphate_carrier_protein_HC_chr4:38265325-38269736_20140818
82.399	1.72635	0.00188893	0.0310792	MSTRG.65869.1	1454	tRNA-splicing endonuclease subunit Sen54-like isoform X1	Medtr8g090105.1_tRNA-splicing_endonuclease_subunit_sen54_amino-terminal_protein_HC_chr8:37741275-37738113_20140818
84.7001	1.7255	1.75e-05	0.00105004	MSTRG.43840.1	511	---NA---	---NA---
74.889	1.72462	0.000195156	0.00629351	MSTRG.10723.2	1143	---NA---	---NA---
135.686	1.72317	0.000407386	0.0107171	MSTRG.30761.5	1715	calmodulin-domain kinase CDPK protein	Medtr1g054865.1_calmodulin-domain_kinase_CDPK_protein_HC_chr1:24041840-24046332_20140818
74.5077	1.7229	0.000154249	0.00530682	MSTRG.32328.3	612	hypothetical protein MTR_6g021860	Medtr6g021860.1_hypothetical_protein_LC_chr6:7558677-7559188_20140818
162.892	1.72022	4.24e-05	0.00204252	38066_t	498	formin-like 2 domain protein	Medtr0094s0010.2_formin-like_2_domain_protein_HC_scaffold0094:6578-7847_20140818
246.167	1.71976	8.01e-06	0.000566028	MSTRG.59343.17	1578	NAD(P)H-dependent 6'-deoxychalcone synthase-like	Medtr3g083130.1_aldo/keto_reductase_family_oxidoreductase_HC_chr3:37505830-37503715_20140818
81.7224	1.71945	0.000423399	0.0110076	MSTRG.70094.1	1731	2-succinylbenzoate-CoA ligase/peroxisomal protein	Medtr2g030240.1_2-succinylbenzoate-CoA_ligase/peroxisomal_protein_HC_chr2:11342493-11346176_20140818
78.1716	1.7194	0.000362597	0.00984477	MSTRG.26775.1	425	---NA---	---NA---
83.8393	1.71727	0.00107988	0.0212198	MSTRG.39060.1	808	thioredoxin s1	Medtr2g079400.1_thioredoxin_HC_chr2:33415050-33415571_20140818
205.268	1.7154	9.7e-08	1.74e-05	MSTRG.27488.2	10606	CC-NBS-LRR resistance protein	Medtr8g028500.1_Rpp4C1_HC_chr8:10848011-10860059_20140818
439.207	1.7149	1.03e-12	1.02e-09	24124_t	3912	disease resistance protein (TIR-NBS-LRR class)	Medtr6g071935.1_NB-ARC_domain_protein_LC_chr6:26646248-26651415_20140818
41.7829	1.71327	0.000132611	0.00473608	MSTRG.32372.1	472	transmembrane protein, putative	Medtr6g072515.1_hypothetical_protein_HC_chr6:26852904-26853960_20140818
62.5909	1.7125	0.000190637	0.00618262	MSTRG.81868.2	693	RNA polymerase II transcriptional coactivator KIWI-like	Medtr3g096690.1_RNA_polymerase_II_transcriptional_coactivator_HC_chr3:44248657-44250867_20140818
145.634	1.7122	2.27e-07	3.43e-05	9513_t	354	transmembrane protein, putative	Medtr3g064040.1_transmembrane_protein,_putative_HC_chr3:28794619-28795716_20140818
99.6166	1.71203	0.000210613	0.00665075	185342_t	4998	disease resistance protein (TIR-NBS-LRR class), putative	Medtr0012s0290.3_disease_resistance_protein_(TIR-NBS-LRR_class),_putative_LC_scaffold0012:214659-207190_20140818
41.1321	1.71198	0.00104165	0.0206997	MSTRG.33231.5	750	potassium transporter 2-like	Medtr3g094090.2_potassium_transporter-like_protein_HC_chr3:42989030-42984711_20140818
155.069	1.71013	2.05e-08	4.74e-06	MSTRG.86196.1	1851	global transcription factor	Medtr7g088700.1_global_transcription_factor_HC_chr7:34591539-34580098_20140818
37.5973	1.71	0.00104269	0.020715	MSTRG.84591.4	1273	suppressor OF protein silencing protein	Medtr3g098260.1_suppressor_OF_protein_silencing_protein_HC_chr3:44852260-44848884_20140818
242.531	1.70983	3.83e-05	0.00190313	MSTRG.59343.20	1079	---NA---	Medtr3g083130.1_aldo/keto_reductase_family_oxidoreductase_HC_chr3:37505830-37503715_20140818
113.056	1.70917	2.51e-10	1.22e-07	MSTRG.63969.10	840	ribosome biogenesis protein SLX9	Medtr1g107495.1_hypothetical_protein_HC_chr1:48803181-48800247_20140818
113.064	1.70839	0.000154541	0.00531214	MSTRG.65544.3	2580	serine/threonine-protein phosphatase 7 long form homolog isoform X1	Medtr3g451080.1_hypothetical_protein_LC_chr3:17724583-17723909_20140818
152.698	1.70776	1.48e-05	0.000918636	MSTRG.35600.4	878	transmembrane protein, putative	Medtr4g050830.1_transmembrane_protein,_putative_HC_chr4:18049440-18049784_20140818
69.9558	1.70738	0.000874566	0.0183615	45886_t	1332	peptidyl-prolyl cis-trans isomerase FKBP65	Medtr8g011100.1_peptidyl-prolyl_cis-trans_isomerase_FKBP65_HC_chr8:2878184-2874176_20140818
185.21	1.70709	2.5e-08	5.64e-06	MSTRG.41554.4	2001	TPX2 (targeting protein for Xklp2) family protein	Medtr1g075310.1_TPX2_(targeting_protein_for_Xklp2)_family_protein_HC_chr1:33342141-33338595_20140818
70.1267	1.70584	1.99e-05	0.00114839	MSTRG.79559.2	565	ankyrin repeat plant-like protein	Medtr8g019450.1_ankyrin_repeat_plant-like_protein_LC_chr8:6840141-6841792_20140818
62.9098	1.70572	0.00127862	0.023797	MSTRG.88817.2	2767	protein FAR1-related sequence 5-like	Medtr1g070355.1_FAR1_DNA-binding_domain_protein_LC_chr1:31110429-31113072_20140818
268.302	1.70528	5.59e-06	0.000426878	MSTRG.84626.1	614	Immediate early response 3-interacting protein 1	Medtr4g019160.1_Yos1-like_protein_HC_chr4:5956061-5952088_20140818
141.315	1.7047	0.000296567	0.00851099	MSTRG.49151.2	1739	peptidyl-prolyl cis-trans isomerase FKBP65	Medtr8g011100.1_peptidyl-prolyl_cis-trans_isomerase_FKBP65_HC_chr8:2878184-2874176_20140818
171.439	1.70451	3.85e-07	5.24e-05	MSTRG.31245.4	238	---NA---	Medtr3g112250.1_hypothetical_protein_HC_chr3:52563593-52563169_20140818
190.339	1.70445	2.4e-05	0.00132351	154688_t	3921	ribonuclease H	Medtr1g054775.1_endonuclease/exonuclease/phosphatase_family_protein_LC_chr1:23942081-23949866_20140818
61.8616	1.70423	0.000642149	0.0147426	137129_t	918	trafficking protein particle complex subunit 1-like	Medtr8g095450.1_trafficking_protein_particle_complex_subunit-like_protein_HC_chr8:39949424-39945171_20140818
114.98	1.70269	4.82e-08	9.68e-06	MSTRG.73031.1	300	ENTH/VHS/GAT family protein	Medtr7g072310.1_ENTH/VHS/GAT_family_protein_HC_chr7:26846469-26852490_20140818
116.571	1.70042	3.23e-08	6.86e-06	MSTRG.65735.1	627	ankyrin repeat and zinc finger protein, putative	Medtr7g075185.1_ankyrin_repeat_and_zinc_finger_protein,_putative_LC_chr7:28229985-28216076_20140818
4521	1.69832	6.95e-11	3.96e-08	9241_t	1200	abscisic acid receptor PYL4-like	Medtr4g014460.1_abscisic_acid_receptor_HC_chr4:4083299-4081745_20140818
48.7136	1.6983	7.44e-05	0.00310633	125486_t	4695	nucleoporin autopeptidase, putative	Medtr1g078050.1_nucleoporin_autopeptidase,_putative_HC_chr1:34911997-34904633_20140818
87.6829	1.69814	0.000751682	0.0164825	MSTRG.21686.13	1339	stress up-regulated Nod 19 protein	Medtr4g094555.1_stress_up-regulated_Nod_19_protein_HC_chr4:38227746-38225671_20140818
44.5024	1.69797	0.000119865	0.00440878	MSTRG.63965.17	1274	---NA---	Medtr8g096850.1_CBS/octicosapeptide/phox/Bemp1_(PB1)_domain_protein_HC_chr8:40652006-40657772_20140818
343.938	1.69738	1.77e-07	2.81e-05	MSTRG.32847.5	1653	cysteine synthase isoform X1	Medtr1g081620.1_O-acetylserine_(thiol)_lyase_HC_chr1:36280172-36284490_20140818
146.429	1.69725	1.52e-08	3.71e-06	MSTRG.11957.1	877	receptor-like protein	Medtr3g027330.1_receptor-like_protein_LC_chr3:8525327-8522316_20140818
39.1121	1.69439	0.00067163	0.0152298	MSTRG.40971.4	954	potassium transporter 10-like	Medtr2g438160.1_potassium_transporter_12_HC_chr2:15394059-15398083_20140818
50.5981	1.69191	2.85e-09	9.48e-07	MSTRG.33480.12	408	RNA-binding (RRM/RBD/RNP motif) family protein	Medtr7g013730.1_RNA-binding_(RRM/RBD/RNP_motif)_family_protein_HC_chr7:3986546-3983001_20140818
130.198	1.69161	0.000513595	0.0125697	MSTRG.81868.1	871	RNA polymerase II transcriptional coactivator KIWI	Medtr3g096690.1_RNA_polymerase_II_transcriptional_coactivator_HC_chr3:44248657-44250867_20140818
33.7676	1.69146	0.000442461	0.0113319	MSTRG.59343.4	839	polyadenylate-binding protein RBP47C	Medtr3g101370.2_polyadenylate-binding_protein_RBP47C_HC_chr3:46662442-46658399_20140818
223.519	1.68982	1.73e-05	0.00104059	MSTRG.52933.6	2649	poly(ADP-ribose) polymerase domain protein	Medtr4g053530.1_poly(ADP-ribose)_polymerase_domain_protein_HC_chr4:19342499-19346920_20140818
173.458	1.68796	7.09e-05	0.00300008	MSTRG.27521.9	1422	65-kDa microtubule-associated protein 1-like	Medtr5g093860.1_microtubule_associated_protein,_MAP65/ASE1_family_protein_HC_chr5:40981176-40985866_20140818
184.335	1.68792	0.000653464	0.0149404	MSTRG.30761.2	2080	calcium-dependent protein kinase 20-like	Medtr1g054865.1_calmodulin-domain_kinase_CDPK_protein_HC_chr1:24041840-24046332_20140818
67.6047	1.68513	0.000339385	0.00938079	19329_t	1581	Cytochrome cd1-nitrite reductase-like, C-terminal haem d1	Medtr7g451160.1_hypothetical_protein_LC_chr7:17166883-17166125_20140818
88.9363	1.68364	0.00231686	0.035729	58535_t	333	60S acidic ribosomal protein P1	Medtr3g092600.1_60S_acidic_ribosomal_protein_HC_chr3:42321505-42319755_20140818
74.3116	1.6825	9.76e-05	0.00380433	MSTRG.12976.3	640	Calcium-dependent protein kinase 1	Medtr1g041150.1_calmodulin-domain_kinase_CDPK_protein_HC_chr1:18398807-18403890_20140818
99.3731	1.68154	0.000107288	0.00406587	MSTRG.51439.2	536	hypothetical protein MTR_6g463490	Medtr6g463490.1_hypothetical_protein_LC_chr6:22015768-22016240_20140818
79.0104	1.68135	0.00113192	0.0219392	MSTRG.84374.3	1642	DNA replication factor CDT1-like protein	Medtr6g477680.1_DNA_replication_factor_CDT1-like_protein_LC_chr6:28503683-28499439_20140818
109.738	1.68054	0.000612932	0.0142407	MSTRG.38504.3	2785	frigida-LIKE protein	Medtr2g091280.1_myosin_heavy_chain-like_protein,_putative_LC_chr2:39416847-39414655_20140818
53.0868	1.67865	0.000348843	0.00957369	MSTRG.87705.1	463	sulfate/bicarbonate/oxalate exchanger and transporter sat-1	Medtr6g086170.1_sulfate/bicarbonate/oxalate_exchanger_and_transporter_sat-1_HC_chr6:32326410-32319823_20140818
371.672	1.67722	0.00113221	0.0219392	MSTRG.87207.1	7058	CC-NBS-LRR resistance protein	Medtr8g028520.1_Rpp4C4_LC_chr8:10879404-10889130_20140818
47.1671	1.6764	0.000695917	0.0156206	MSTRG.10868.3	710	Lipid transfer protein	Medtr1g103490.1_Lipid_transfer_protein_HC_chr1:46837798-46839766_20140818
221.548	1.67508	8.35e-09	2.31e-06	MSTRG.41554.3	2039	TPX2 (targeting protein for Xklp2) family protein	Medtr1g075310.1_TPX2_(targeting_protein_for_Xklp2)_family_protein_HC_chr1:33342141-33338595_20140818
123.975	1.67489	0.000164331	0.00556592	46471_t	2145	zinc finger BED domain-containing protein RICESLEEPER 2-like	Medtr4g055480.1_hypothetical_protein_LC_chr4:20214968-20214399_20140818
52.5443	1.67351	0.000225762	0.00698392	169575_t	456	DUF538 family protein	Medtr7g053107.1_DUF538_family_protein_HC_chr7:18695852-18693573_20140818
12860.8	1.67336	3.63e-10	1.63e-07	MSTRG.43621.1	903	transmembrane protein, putative	Medtr7g068350.1_transmembrane_protein,_putative_LC_chr7:25002434-25001592_20140818
172.327	1.67192	7.89e-05	0.00323699	MSTRG.28921.2	3125	disease resistance protein (TIR-NBS-LRR class), putative	Medtr4g080777.1_disease_resistance_protein_(TIR-NBS-LRR_class),_putative_LC_chr4:31243045-31248009_20140818
52.6015	1.67048	0.000146735	0.00510841	MSTRG.718.1	1006	---NA---	---NA---
38.1988	1.6701	0.00106302	0.0209887	MSTRG.40555.1	776	GPI-GlcNAc transferase complex, PIG-H component	Medtr7g006210.2_GPI-GlcNAc_transferase_complex,_PIG-H_component_HC_chr7:597645-600510_20140818
70.3232	1.66995	2.74e-08	6.04e-06	MSTRG.42934.1	387	receptor-like kinase	Medtr1g031230.1_hypothetical_protein_HC_chr1:10907224-10907397_20140818
51.8352	1.66987	0.000752854	0.0164993	MSTRG.40403.1	403	---NA---	Medtr4g071340.1_hypothetical_protein_LC_chr4:26933968-26934308_20140818
69.7156	1.66978	9.91e-07	0.000112243	MSTRG.61260.8	220	---NA---	---NA---
258.978	1.66969	0.00233721	0.0359033	MSTRG.30446.5	1484	H+-transporting two-sector ATPase, alpha/beta subunit, central region, related	Medtr3g065700.1_hypothetical_protein_HC_chr3:29684619-29685533_20140818
37.4752	1.66818	6.18e-05	0.002709	MSTRG.11039.2	1053	---NA---	---NA---
51.5031	1.6671	0.000204876	0.00651609	MSTRG.24353.1	932	putative E3 ubiquitin-protein ligase RING1a	Medtr6g082590.1_hypothetical_protein_HC_chr6:30805659-30807828_20140818
16109.7	1.66698	4.93e-10	2.11e-07	MSTRG.21065.2	1070	transmembrane protein, putative	Medtr7g068350.1_transmembrane_protein,_putative_LC_chr7:25002434-25001592_20140818
86.2751	1.66436	0.000934921	0.0192529	192895_t	1389	stress up-regulated Nod 19 protein	Medtr4g094555.1_stress_up-regulated_Nod_19_protein_HC_chr4:38227746-38225671_20140818
424.941	1.66404	1.79e-07	2.84e-05	MSTRG.13045.1	421	---NA---	---NA---
56.5273	1.66323	0.000798444	0.0171586	MSTRG.76455.1	521	serine/threonine protein phosphatase 2A 55 kDa regulatory subunit B beta-like protein	Medtr2g100370.1_protein_phosphatase_2A_55_kDa_regulatory_subunit_B_HC_chr2:43120098-43128208_20140818
185.028	1.66315	7.52e-05	0.00313096	MSTRG.27521.4	2185	65-kDa microtubule-associated protein 1-like	Medtr5g093860.1_microtubule_associated_protein,_MAP65/ASE1_family_protein_HC_chr5:40981176-40985866_20140818
154.802	1.66289	0.000297791	0.00853291	167518_t	1671	serine/threonine-protein phosphatase 7 long form homolog	Medtr3g011100.1_F-box_and_associated_interaction_domain_protein_HC_chr3:2698683-2696484_20140818
411.249	1.66136	1.85e-07	2.91e-05	MSTRG.13045.2	472	---NA---	---NA---
3804.76	1.66102	6.18e-09	1.81e-06	1382_t	786	transmembrane protein, putative	Medtr7g068350.1_transmembrane_protein,_putative_LC_chr7:25002434-25001592_20140818
29.9805	1.66085	0.000995349	0.0200757	MSTRG.32354.1	484	---NA---	Medtr8g468450.1_hypothetical_protein_LC_chr8:24801957-24801712_20140818
32.8048	1.6602	0.00107821	0.0212016	102112_t	4857	NB-ARC domain disease resistance protein	Medtr3g451650.1_NB-ARC_domain_disease_resistance_protein_LC_chr3:18725798-18721269_20140818
159.274	1.65964	0.000671898	0.0152337	MSTRG.26263.1	213	cytochrome P450 family 96 protein, putative	Medtr2g101910.1_hypothetical_protein_LC_chr2:43851236-43850044_20140818
2895.49	1.6583	9.78e-05	0.00381002	MSTRG.68580.1	344	hypothetical protein GOBAR_DD27809	Medtr0055s0030.1_hypothetical_protein_HC_scaffold0055:6527-3946_20140818
171.631	1.65772	0.000126254	0.0045839	79388_t	1491	Citrate synthase, glyoxysomal	Medtr3g048920.1_citrate_synthase_3,_peroxisomal_protein_HC_chr3:18169348-18175403_20140818
259.106	1.65744	3.14e-05	0.00163964	MSTRG.52933.9	2858	poly(ADP-ribose) polymerase domain protein	Medtr4g053530.1_poly(ADP-ribose)_polymerase_domain_protein_HC_chr4:19342499-19346920_20140818
4771.38	1.65709	0.000218785	0.00683221	MSTRG.4053.1	236	CHK1 checkpoint-like protein	Medtr0052s0170.1_hypothetical_protein_HC_scaffold0052:77541-80589_20140818
92.8674	1.65687	5.89e-06	0.000443787	MSTRG.79559.3	663	ankyrin repeat plant-like protein	Medtr0470s0020.1_ankyrin_repeat_plant-like_protein_LC_scaffold0470:10687-11436_20140818
32.9622	1.65658	0.000103748	0.00396959	188803_t	774	PHD finger protein ING2	Medtr7g085450.1_PHD_finger-like_protein_HC_chr7:33106030-33108687_20140818
440.956	1.65623	6.75e-12	5.23e-09	MSTRG.73880.4	2837	disease resistance protein (TIR-NBS-LRR class)	Medtr1g007300.1_disease_resistance_protein_(TIR-NBS-LRR_class)_LC_chr1:268696-264988_20140818
55.6176	1.65609	0.00364711	0.0484245	MSTRG.89208.1	4032	structural maintenance of chromosomes protein 3	Medtr1g051825.2_structural_maintenance_of_chromosomes_protein_HC_chr1:20727128-20747784_20140818
56.3199	1.6553	1.2e-05	0.000778327	MSTRG.82634.2	1459	50S ribosomal protein L3-2, chloroplastic	Medtr6g006970.1_50S_ribosomal_protein_L3P_HC_chr6:1316494-1310518_20140818
100.543	1.65518	0.000452939	0.0115304	70105_t	3048	putative disease resistance protein RGA4	Medtr4g022480.1_NBS-LRR_type_disease_resistance_protein_LC_chr4:7493652-7497470_20140818
84.8559	1.64862	1.85e-05	0.00109079	15070_t	1908	cysteine-rich receptor-like kinase	Medtr8g041880.1_cysteine-rich_receptor-like_kinase_HC_chr8:15802331-15798924_20140818
59.0864	1.64861	0.00153225	0.0269723	MSTRG.49488.1	232	---NA---	---NA---
51.2721	1.647	0.000464961	0.0117394	MSTRG.23933.1	1106	hypothetical protein MTR_0275s0020	Medtr0275s0040.1_hypothetical_protein_HC_scaffold0275:21984-21107_20140818
1520.33	1.64555	2.8e-08	6.1e-06	128500_t	306	Defensin-like protein	Medtr8g070770.1_Defensin_MtDef4.2_HC_chr8:29809141-29808336_20140818
353.088	1.64528	1.96e-06	0.000191946	MSTRG.25312.1	6033	disease resistance protein (TIR-NBS-LRR class)	Medtr4g020700.1_disease_resistance_protein_(TIR-NBS-LRR_class)_LC_chr4:6645774-6655619_20140818
38.5804	1.64417	0.00125637	0.023506	MSTRG.77878.2	1619	NB-ARC domain disease resistance protein	Medtr3g062980.1_hypothetical_protein_LC_chr3:28483211-28478928_20140818
74.8582	1.64404	0.000324062	0.00907011	MSTRG.30680.1	305	glutamate-ammonia ligase-like protein	Medtr3g035970.3_glutamate-ammonia_ligase-like_protein_HC_chr3:13353643-13361176_20140818
713.183	1.64392	3.89e-09	1.23e-06	11457_t	597	Indole-3-acetic acid-induced protein ARG2	Medtr1g088230.1_late_embryogenesis_abundant_protein_HC_chr1:39491348-39490105_20140818
94.2966	1.6436	0.00028819	0.00833433	MSTRG.31778.1	3337	NBS-LRR type disease resistance protein	Medtr4g022480.1_NBS-LRR_type_disease_resistance_protein_LC_chr4:7493652-7497470_20140818
29.6192	1.64196	0.000225489	0.00697688	MSTRG.13537.1	1583	protein phosphatase 2C 56-like	Medtr4g125810.1_protein_phosphatase_2C_ABI2-like_protein_HC_chr4:52220723-52217353_20140818
10673.8	1.64076	1.41e-07	2.35e-05	MSTRG.84236.2	2911	galactinol-raffinose galactosyltransferase	Medtr7g091880.1_galactinol-raffinose_galactosyltransferase_HC_chr7:36372945-36367215_20140818
384.911	1.64068	1.98e-10	1.01e-07	MSTRG.26065.1	432	---NA---	---NA---
112.238	1.64013	1.03e-06	0.000115098	MSTRG.17882.1	273	---NA---	---NA---
325.364	1.63919	4.33e-09	1.34e-06	MSTRG.72239.4	722	---NA---	---NA---
1828.48	1.63708	7.74e-13	8.11e-10	MSTRG.32696.4	724	hypothetical protein MTR_7g065130	Medtr7g065130.1_hypothetical_protein_HC_chr7:23733151-23734236_20140818
333.602	1.63685	1.13e-05	0.000742644	MSTRG.29945.1	331	hypothetical protein PanWU01x14_118800	Medtr1g040060.1_hypothetical_protein_HC_chr1:14663973-14664243_20140818
57.5203	1.63682	2.23e-06	0.000212022	MSTRG.82634.1	1512	50S ribosomal protein L3-2, chloroplastic	Medtr6g006970.1_50S_ribosomal_protein_L3P_HC_chr6:1316494-1310518_20140818
2673.46	1.63564	0.0014998	0.0265879	MSTRG.20667.4	520	---NA---	---NA---
65.1123	1.63542	2.12e-07	3.27e-05	MSTRG.84646.1	1213	putative pectate lyase 21	Medtr1g115550.1_pectate_lyase_family_protein_HC_chr1:52233018-52230795_20140818
10219.6	1.63529	8.78e-06	0.000609007	MSTRG.84236.1	2780	probable galactinol--sucrose galactosyltransferase 2 isoform X1	Medtr7g091880.1_galactinol-raffinose_galactosyltransferase_HC_chr7:36372945-36367215_20140818
128.69	1.63515	6.77e-05	0.00290135	136322_t	624	BTB/POZ and MATH domain protein	Medtr8g006190.1_BTB/POZ_and_MATH_domain_protein_HC_chr8:537855-540789_20140818
63.5422	1.63501	0.000684717	0.0154471	MSTRG.86655.11	2744	TRAF superfamily protein, putative	Medtr8g089030.1_TRAF_superfamily_protein,_putative_LC_chr8:37006804-36991603_20140818
96.9288	1.63403	9.89e-07	0.000112194	MSTRG.76014.3	1207	---NA---	---NA---
113.498	1.63392	5.53e-07	7.05e-05	MSTRG.84963.3	910	SEC12p-like protein	Medtr4g084650.1_SEC12p-like_protein_HC_chr4:32970884-32978413_20140818
2154.36	1.63332	6.81e-12	5.25e-09	MSTRG.32696.6	683	hypothetical protein MTR_7g065130	Medtr7g065130.1_hypothetical_protein_HC_chr7:23733151-23734236_20140818
324.608	1.63294	3.99e-06	0.000331322	MSTRG.25312.2	6000	disease resistance protein (TIR-NBS-LRR class)	Medtr4g020700.1_disease_resistance_protein_(TIR-NBS-LRR_class)_LC_chr4:6645774-6655619_20140818
71.7401	1.63226	1.99e-05	0.00114835	MSTRG.59343.2	1943	polyadenylate-binding protein RBP47C	Medtr3g101370.2_polyadenylate-binding_protein_RBP47C_HC_chr3:46662442-46658399_20140818
52.7311	1.63156	0.0015168	0.0267882	MSTRG.53236.4	405	SNF2 family amino-terminal protein	Medtr4g118720.1_SNF2_family_amino-terminal_protein_HC_chr4:49190490-49169826_20140818
62.3112	1.63106	0.0032215	0.0445966	MSTRG.38589.1	634	---NA---	---NA---
110.576	1.63055	1.51e-05	0.000933606	MSTRG.2773.2	263	thioredoxin M-type protein	Medtr8g059015.1_thioredoxin_M-type_protein_HC_chr8:20541253-20543952_20140818
81.3355	1.63017	2.31e-05	0.00128419	MSTRG.48471.3	291	---NA---	---NA---
90.1571	1.6294	0.00114659	0.0221183	MSTRG.58895.8	789	hydroproline-rich protein	hydroproline-rich protein
323.957	1.62866	2.45e-06	0.000227421	MSTRG.25312.4	5001	disease resistance protein (TIR-NBS-LRR class)	Medtr4g020700.1_disease_resistance_protein_(TIR-NBS-LRR_class)_LC_chr4:6645774-6655619_20140818
40.8588	1.62808	0.000285549	0.0082765	MSTRG.71575.2	223	---NA---	---NA---
135.417	1.62749	0.000393219	0.0104419	MSTRG.4625.3	1340	tRNA-splicing endonuclease subunit Sen54-like isoform X1	Medtr8g090105.1_tRNA-splicing_endonuclease_subunit_sen54_amino-terminal_protein_HC_chr8:37741275-37738113_20140818
2137.62	1.62483	3.47e-15	6.81e-12	MSTRG.21477.2	390	---NA---	Medtr5g032670.1_hypothetical_protein_HC_chr5:14074645-14075917_20140818
137.51	1.62431	0.000855898	0.0180726	MSTRG.69625.2	2830	cysteine-rich receptor-like protein kinase	Medtr7g083690.1_endonuclease/exonuclease/phosphatase_family_protein_LC_chr7:32221247-32217435_20140818
52.4319	1.62421	0.000126475	0.00458869	MSTRG.8235.1	902	vacuolar H+-ATPase	Medtr4g005410.1_archaeal/vacuolar-type_H+-ATPase_subunit_A_HC_chr4:243741-249406_20140818
10674.5	1.62407	1.64e-07	2.63e-05	MSTRG.84236.3	2931	galactinol-raffinose galactosyltransferase	Medtr7g091880.1_galactinol-raffinose_galactosyltransferase_HC_chr7:36372945-36367215_20140818
627.799	1.62368	3.8e-06	0.000320111	MSTRG.34589.1	596	cytochrome P450 family 96 protein, putative	Medtr5g019820.1_hypothetical_protein_LC_chr5:7525320-7524963_20140818
85.2588	1.62313	3.66e-05	0.00184037	MSTRG.66342.2	842	---NA---	---NA---
51.4062	1.61691	0.00308753	0.0433424	20803_t	1044	hypothetical protein MTR_4g133250	Medtr4g133250.1_hypothetical_protein_HC_chr4:55745010-55743934_20140818
135.891	1.61478	0.000484389	0.0120705	MSTRG.81748.1	647	tRNA-splicing endonuclease subunit Sen54-like	Medtr8g090105.1_tRNA-splicing_endonuclease_subunit_sen54_amino-terminal_protein_HC_chr8:37741275-37738113_20140818
95.5723	1.6147	3.68e-05	0.00184919	MSTRG.45787.1	1779	kinesin motor domain protein	Medtr4g123730.1_kinesin_motor_domain_protein_HC_chr4:50983207-50995376_20140818
56.5575	1.61344	0.000739191	0.0162897	MSTRG.41087.1	595	---NA---	---NA---
39.7034	1.61339	0.0037925	0.0497626	MSTRG.2922.2	1276	Retrovirus-related Pol polyprotein from transposon TNT 1-94	Medtr6g472230.1_disease_resistance_protein_(TIR-NBS-LRR_class),_putative_LC_chr6:26054240-26059623_20140818
772.599	1.61333	6.14e-08	1.18e-05	53431_t	1575	plant/F10M23-360 protein	Medtr5g036420.1_plant/F10M23-360_protein_HC_chr5:15875140-15868742_20140818
93.7653	1.61293	0.00014628	0.00509716	MSTRG.61461.1	229	---NA---	---NA---
84.3717	1.61094	0.000123376	0.00450474	MSTRG.29095.3	403	---NA---	---NA---
91.3485	1.61031	3.5e-05	0.00177744	MSTRG.53236.3	464	SNF2 family amino-terminal protein	Medtr4g118720.1_SNF2_family_amino-terminal_protein_HC_chr4:49190490-49169826_20140818
64.6873	1.60962	0.000490271	0.0121701	MSTRG.55737.1	313	---NA---	---NA---
2791.12	1.60734	0.00137228	0.0249643	MSTRG.20667.3	537	transmembrane protein, putative	Medtr3g014608.1_transmembrane_protein,_putative_LC_chr3:4176894-4177520_20140818
108.5	1.60674	5.06e-10	2.16e-07	MSTRG.1142.5	2499	probable myosin-binding protein 5	Medtr0168s0060.1_zein-binding_protein_HC_scaffold0168:18855-21061_20140818
108.693	1.60584	9.21e-05	0.00363381	MSTRG.51439.1	580	hypothetical protein MTR_6g463490	Medtr6g463490.1_hypothetical_protein_LC_chr6:22015768-22016240_20140818
127.905	1.60495	3.79e-05	0.00188516	MSTRG.66728.1	277	---NA---	---NA---
281.235	1.60488	1.07e-08	2.82e-06	MSTRG.9276.3	1103	esterase/lipase/thioesterase family protein	Medtr2g039480.1_esterase/lipase/thioesterase_family_protein_HC_chr2:17302990-17297098_20140818
39.3047	1.60442	0.000230939	0.00709699	MSTRG.14872.3	943	AP2-like ethylene-responsive transcription factor ANT	Medtr4g097520.1_AP2-like_ethylene-responsive_transcription_factor_HC_chr4:40188319-40192060_20140818
358.643	1.60387	3.43e-06	0.000295129	MSTRG.69597.1	228	---NA---	---NA---
109.418	1.60174	5.98e-07	7.5e-05	47434_t	3096	hypothetical protein TSUD_88880	Medtr3g081050.1_hypothetical_protein_LC_chr3:36710284-36708952_20140818
260.28	1.60008	1.05e-05	0.000697367	59270_t	5127	disease resistance protein (TIR-NBS-LRR class)	Medtr4g020700.2_disease_resistance_protein_(TIR-NBS-LRR_class)_LC_chr4:6645805-6656127_20140818
43.1895	1.60005	0.0011944	0.0227599	142485_t	1032	serine carboxypeptidase-like protein	Medtr1g021020.1_serine_carboxypeptidase-like_protein_LC_chr1:6217180-6214162_20140818
69.5637	1.59952	0.000164932	0.00557651	MSTRG.7859.2	880	ribosomal RNA-processing-like protein	Medtr2g062880.2_ribosomal_RNA-processing-like_protein_HC_chr2:26598656-26593763_20140818
41.9276	1.59946	6.55e-05	0.00282611	23048_t	999	emp24/gp25L/p24 family protein	Medtr8g088980.1_emp24/gp25L/p24_family_protein_HC_chr8:36969976-36972612_20140818
49.9044	1.59755	0.00313963	0.0438591	194002_t	2703	protein FAR1-related sequence 5-like	Medtr1g070355.1_FAR1_DNA-binding_domain_protein_LC_chr1:31110429-31113072_20140818
42.8131	1.59554	0.00082043	0.0174784	29879_t	498	hypothetical protein MTR_6g090460	Medtr6g090460.1_hypothetical_protein_HC_chr6:34039171-34037721_20140818
101.664	1.59472	0.000785471	0.0169977	MSTRG.31778.2	3287	putative disease resistance protein RGA4	Medtr4g022480.1_NBS-LRR_type_disease_resistance_protein_LC_chr4:7493652-7497470_20140818
48.8324	1.59452	0.00111726	0.021731	28343_t	375	transmembrane protein, putative	Medtr7g076630.1_transmembrane_protein,_putative_HC_chr7:28862573-28866796_20140818
90.0932	1.59436	0.000339329	0.00938079	MSTRG.68405.45	771	TRAF superfamily protein, putative	Medtr8g089030.2_TRAF_superfamily_protein,_putative_LC_chr8:37006804-36995677_20140818
4805.11	1.59308	0.000103986	0.00397576	MSTRG.73636.1	592	rRNA intron-encoded homing endonuclease	Medtr0052s0110.1_rRNA_intron-encoded_homing_endonuclease,_putative_HC_scaffold0052:50226-47921_20140818
89.309	1.59197	3.25e-05	0.00168311	186818_t	3054	NB-ARC domain disease resistance protein	Medtr7g071940.1_NBS-LRR_type_disease_resistance_protein_HC_chr7:26709086-26705250_20140818
44.9991	1.59166	0.00119833	0.0228124	MSTRG.22841.2	499	F-box protein 7	Medtr3g088580.2_F-box_only_protein_HC_chr3:40066952-40073043_20140818
60.4738	1.59154	0.000370122	0.00999304	MSTRG.11410.1	1631	LNS2 (lipin/Ned1/Smp2) protein	Medtr3g101590.2_LNS2_(lipin/Ned1/Smp2)_protein_HC_chr3:46757881-46763398_20140818
61.1598	1.59103	4.46e-05	0.00212392	MSTRG.33457.7	820	transmembrane protein, putative	Medtr6g072515.1_hypothetical_protein_HC_chr6:26852904-26853960_20140818
435.516	1.59053	7.81e-06	0.000554827	45486_t	459	pathogenesis-related protein bet V I family protein	Medtr8g045570.1_pathogenesis-related_protein_bet_V_I_family_protein_HC_chr8:17825808-17821846_20140818
69.7968	1.58942	0.00129342	0.023986	MSTRG.46796.2	661	RALF-like protein	Medtr7g028468.1_Nodule_Cysteine-Rich_(NCR)_secreted_peptide_HC_chr7:9697644-9696114_20140818
45.5702	1.58857	0.000757617	0.0165659	MSTRG.718.2	843	---NA---	---NA---
439.272	1.58815	8.82e-06	0.000610501	34374_t	459	pathogenesis-related protein bet V I family protein	Medtr8g045570.1_pathogenesis-related_protein_bet_V_I_family_protein_HC_chr8:17825808-17821846_20140818
446.031	1.58671	1.45e-12	1.39e-09	MSTRG.32696.3	260	hypothetical protein MTR_7g065130	Medtr7g065130.1_hypothetical_protein_HC_chr7:23733151-23734236_20140818
85.3202	1.58489	8.24e-05	0.00334251	77689_t	315	thioredoxin M-type protein	Medtr8g059015.1_thioredoxin_M-type_protein_HC_chr8:20541253-20543952_20140818
69.172	1.58415	7.84e-05	0.00322051	MSTRG.29697.1	3504	disease resistance protein (CC-NBS-LRR class) family protein	Medtr3g021380.1_NBS-LRR_type_disease_resistance_protein_LC_chr3:6260285-6256594_20140818
32.4113	1.58321	0.00243882	0.0369984	MSTRG.25981.1	1659	F-box/RNI/FBD-like domain protein	Medtr8g062310.1_F-box/RNI/FBD-like_domain_protein_HC_chr8:26037119-26040728_20140818
197.659	1.58314	2.53e-05	0.00138352	MSTRG.13365.7	858	replication factor-A carboxy-terminal domain protein	Medtr1g105785.1_replication_factor-A_carboxy-terminal_domain_protein_HC_chr1:47732917-47735741_20140818
54.9904	1.58282	0.003426	0.0464644	MSTRG.42181.1	1062	probable calcium-binding protein CML13	Medtr5g011850.1_EF_hand_calcium-binding_family_protein_HC_chr5:3472901-3473995_20140818
8744.8	1.58211	4.2e-05	0.0020313	118724_t	5568	probable galactinol--sucrose galactosyltransferase 2 isoform X1	Medtr7g091880.1_galactinol-raffinose_galactosyltransferase_HC_chr7:36372945-36367215_20140818
201.879	1.58169	0.00063402	0.0146084	MSTRG.47606.5	1600	transmembrane protein, putative	Medtr6g007360.1_hypothetical_protein_HC_chr6:1576905-1572672_20140818
95.587	1.58151	0.000179071	0.00590758	MSTRG.41554.2	1273	TPX2 (targeting protein for Xklp2) family protein	Medtr1g075310.1_TPX2_(targeting_protein_for_Xklp2)_family_protein_HC_chr1:33342141-33338595_20140818
41.0348	1.58148	0.00125974	0.0235502	MSTRG.31056.2	881	meiotic recombination protein DMC1, putative	Medtr1g102670.1_meiotic_recombination_protein_DMC1,_putative_HC_chr1:46400379-46403108_20140818
47.5493	1.5813	2.43e-05	0.00133751	MSTRG.1841.15	1243	flavin containing monooxygenase FMO GS-OX-like protein	Medtr8g037910.3_flavin_containing_monooxygenase_FMO_GS-OX-like_protein_HC_chr8:14046330-14042504_20140818
55.16	1.58076	0.00114318	0.0220745	43192_t	819	vacuolar protein sorting-associated protein 22 homolog 1	Medtr3g051210.1_vacuolar_sorting_protein_SNF8_HC_chr3:20205015-20212262_20140818
108.41	1.58024	0.000349133	0.00957656	MSTRG.5707.2	2625	PREDICTED: uncharacterized protein LOC100807274 isoform X1	Medtr2g092960.1_Myb/SANT-like_DNA-binding_domain_protein_LC_chr2:39569693-39563388_20140818
41.6627	1.5793	0.00066083	0.0150444	MSTRG.71575.1	256	---NA---	---NA---
189.22	1.57886	3.46e-05	0.00176735	MSTRG.84626.2	530	Immediate early response 3-interacting protein 1	Medtr4g019160.1_Yos1-like_protein_HC_chr4:5956061-5952088_20140818
12600.3	1.5768	2.83e-09	9.45e-07	MSTRG.43621.2	832	transmembrane protein, putative	Medtr7g068350.1_transmembrane_protein,_putative_LC_chr7:25002434-25001592_20140818
36.3129	1.57643	0.00052398	0.0127435	MSTRG.32353.1	307	hypothetical protein MTR_8g468450	Medtr8g468450.1_hypothetical_protein_LC_chr8:24801957-24801712_20140818
136.752	1.57603	6.1e-07	7.63e-05	MSTRG.39415.6	2415	cysteine-rich receptor-like kinase	Medtr8g041880.1_cysteine-rich_receptor-like_kinase_HC_chr8:15802331-15798924_20140818
186.964	1.57514	0.000417953	0.0109154	MSTRG.77557.2	2078	serine/threonine-protein phosphatase 7 long form homolog	Medtr3g011100.1_F-box_and_associated_interaction_domain_protein_HC_chr3:2698683-2696484_20140818
198.127	1.57428	2.78e-11	1.8e-08	150085_t	882	dynamin-2B-like protein	Medtr4g030140.1_dynamin-2B-like_protein_HC_chr4:10433929-10449261_20140818
50.7175	1.57398	0.00162084	0.0280971	MSTRG.81745.1	500	flocculation protein FLO11-like isoform X2	Medtr7g073720.1_hypothetical_protein_HC_chr7:27594597-27590526_20140818
150.669	1.57316	3.55e-07	4.93e-05	178638_t	594	DNA-directed RNA polymerases II, IV and V subunit 6A-like	Medtr7g092450.1_DNA-directed_RNA_polymerase_I,_II_HC_chr7:36632357-36635472_20140818
139.407	1.57309	9e-08	1.64e-05	MSTRG.58629.1	3129	TPX2 (targeting protein for Xklp2) family protein	Medtr1g075310.1_TPX2_(targeting_protein_for_Xklp2)_family_protein_HC_chr1:33342141-33338595_20140818
244.626	1.57184	1.83e-07	2.9e-05	MSTRG.70902.5	855	sodium bile acid symporter family protein	Medtr2g073190.1_sodium_bile_acid_symporter_family_protein_LC_chr2:30991272-30983345_20140818
713.416	1.57141	7.7e-13	8.11e-10	43560_t	1857	stem-specific protein TSJT1-like	Medtr2g022520.1_aluminum_induced_protein_with_YGL_and_LRDR_motif_protein_HC_chr2:7790362-7796721_20140818
500.846	1.57133	9.5e-08	1.71e-05	MSTRG.54504.1	1531	cytochrome P450 84A1-like	Medtr8g076290.1_cytochrome_P450_family_monooxygenase_HC_chr8:32316653-32312590_20140818
7571.62	1.56943	4.66e-05	0.00219675	193100_t	2301	probable galactinol--sucrose galactosyltransferase 2 isoform X1	Medtr7g091880.1_galactinol-raffinose_galactosyltransferase_HC_chr7:36372945-36367215_20140818
831.473	1.56925	1.22e-08	3.12e-06	MSTRG.72724.1	476	60S acidic ribosomal protein	Medtr3g092600.1_60S_acidic_ribosomal_protein_HC_chr3:42321505-42319755_20140818
40.966	1.56818	0.000815149	0.017397	MSTRG.19648.5	1669	cytochrome P450 family 72 protein	Medtr2g072340.1_cytochrome_P450_family_72_protein_HC_chr2:30434253-30437998_20140818
72.7911	1.56794	2.31e-06	0.000217926	MSTRG.67534.12	2176	nucleoporin autopeptidase	Medtr1g078040.2_nucleoporin_autopeptidase_HC_chr1:34898558-34890792_20140818
96.4578	1.56542	9.3e-05	0.00366177	MSTRG.59343.3	2137	polyadenylate-binding protein RBP47C	Medtr3g101370.2_polyadenylate-binding_protein_RBP47C_HC_chr3:46662442-46658399_20140818
97.2676	1.56528	0.000600169	0.0140262	MSTRG.5707.1	2364	PREDICTED: uncharacterized protein LOC100807274 isoform X1	Medtr2g092960.1_Myb/SANT-like_DNA-binding_domain_protein_LC_chr2:39569693-39563388_20140818
109.059	1.56518	3.84e-07	5.23e-05	136117_t	993	V-type proton ATPase subunit B 2	Medtr1g112870.1_archaeal/vacuolar-type_H+-ATPase_subunit_B_HC_chr1:51173321-51179687_20140818
190.422	1.56462	1.46e-08	3.58e-06	MSTRG.51794.2	353	succinate dehydrogenase [ubiquinone] flavoprotein subunit	Medtr5g020050.1_succinate_dehydrogenase_[ubiquinone]_flavoprotein_subunit_HC_chr5:7636353-7644053_20140818
150.164	1.56303	3.75e-05	0.00187247	MSTRG.77109.1	1313	acid phosphatase/vanadium-dependent haloperoxidase	Medtr3g085670.1_acid_phosphatase/vanadium-dependent_haloperoxidase_HC_chr3:38761891-38758587_20140818
49.3946	1.56254	0.000633142	0.0145964	MSTRG.64454.1	1017	protein argonaute 4-like	Medtr5g087870.2_eukaryotic_translation_initiation_factor_2c,_putative_HC_chr5:38109974-38119293_20140818
48.6861	1.56151	0.00124117	0.0232958	MSTRG.77107.2	358	---NA---	---NA---
48.1677	1.56136	0.00063663	0.0146506	8069_t	486	LIM domain-containing protein WLIM1 isoform X1	Medtr1g017950.1_GATA_type_zinc_finger_transcription_factor_family_protein_HC_chr1:5125381-5123274_20140818
108.554	1.56126	2.81e-06	0.000252848	MSTRG.1344.1	1016	---NA---	---NA---
126.927	1.5611	7.35e-05	0.00307798	MSTRG.55642.1	320	---NA---	---NA---
390.574	1.56102	2.26e-12	1.97e-09	MSTRG.80088.1	1527	WRKY family transcription factor	Medtr3g106060.1_WRKY_family_transcription_factor_HC_chr3:48926808-48922741_20140818
104.022	1.56074	0.00240363	0.0366475	MSTRG.52476.1	1318	replication factor-A carboxy-terminal domain protein	Medtr8g479260.1_replication_factor-A_carboxy-terminal_domain_protein_LC_chr8:33777150-33779789_20140818
90.9433	1.56054	0.000414159	0.0108456	MSTRG.52933.11	1711	poly(ADP-ribose) polymerase domain protein	Medtr4g053530.1_poly(ADP-ribose)_polymerase_domain_protein_HC_chr4:19342499-19346920_20140818
1707.4	1.56027	0.00369465	0.0488299	MSTRG.20666.8	584	transmembrane protein, putative	Medtr3g016080.1_transmembrane_protein,_putative_LC_chr3:4763213-4761952_20140818
350.022	1.5599	1.13e-05	0.000742644	MSTRG.24272.3	774	transmembrane protein, putative	Medtr5g080330.1_aspartic_protease_family_protein,_putative_LC_chr5:34380900-34377963_20140818
1917.59	1.55962	0.0015819	0.0275888	50758_t	969	nodulin MtN21/EamA-like transporter family protein	Medtr1g030580.1_nodulin_MtN21/EamA-like_transporter_family_protein_HC_chr1:10605525-10599616_20140818
69.4344	1.55876	0.00187471	0.0309301	39559_t	3405	disease resistance protein (CC-NBS-LRR class) family protein	Medtr3g018930.1_LRR_and_NB-ARC_domain_disease_resistance_protein_LC_chr3:5251491-5247151_20140818
1382.54	1.55705	4.28e-08	8.74e-06	MSTRG.76785.2	216	cytochrome P450 family 96 protein, putative	Medtr4g118580.1_hypothetical_protein_LC_chr4:49106193-49110487_20140818
289.744	1.55668	0.000241026	0.00731015	MSTRG.87739.5	404	---NA---	---NA---
63.7748	1.55645	0.00216403	0.034051	MSTRG.68456.2	1584	exosome complex exonuclease RRP6	Medtr6g027760.1_exosome_complex_exonuclease_RRP6_HC_chr6:9716121-9707250_20140818
447.696	1.55643	1.16e-08	2.99e-06	MSTRG.78112.7	2196	HAT family dimerization domain containing protein	Medtr3g028350.1_hypothetical_protein_LC_chr3:8989418-8988833_20140818
46.6288	1.55529	0.00193037	0.0315194	MSTRG.48841.1	1204	transmembrane protein, putative	Medtr8g027525.1_hypothetical_protein_LC_chr8:9840345-9842312_20140818
258.037	1.55473	3.3e-05	0.00170058	MSTRG.59343.18	1568	NAD(P)H-dependent 6'-deoxychalcone synthase-like	Medtr3g083130.1_aldo/keto_reductase_family_oxidoreductase_HC_chr3:37505830-37503715_20140818
74.7753	1.55401	0.000518626	0.012649	MSTRG.86655.8	2958	TRAF superfamily protein, putative	Medtr8g089030.1_TRAF_superfamily_protein,_putative_LC_chr8:37006804-36991603_20140818
53.8372	1.55372	4.9e-06	0.000387509	MSTRG.67534.13	1847	nucleoporin autopeptidase	Medtr1g078040.2_nucleoporin_autopeptidase_HC_chr1:34898558-34890792_20140818
1358.21	1.552	4.38e-08	8.92e-06	MSTRG.76785.3	218	cytochrome P450 family 96 protein, putative	Medtr5g019820.1_hypothetical_protein_LC_chr5:7525320-7524963_20140818
172.171	1.55108	0.000421847	0.0109893	MSTRG.77557.3	1904	serine/threonine-protein phosphatase 7 long form homolog	Medtr3g011100.1_F-box_and_associated_interaction_domain_protein_HC_chr3:2698683-2696484_20140818
137.936	1.55104	5.06e-05	0.00233171	MSTRG.18226.1	201	---NA---	---NA---
46.305	1.55052	0.00314292	0.0438893	MSTRG.39677.12	360	GRAM domain protein/ABA-responsive-like protein	Medtr8g100065.2_GRAM_domain_protein/ABA-responsive-like_protein_HC_chr8:42396373-42394577_20140818
66.5824	1.54974	0.000929488	0.0191716	MSTRG.84042.1	969	---NA---	---NA---
50.0302	1.54958	0.00119047	0.0227158	MSTRG.75091.3	312	---NA---	---NA---
39.5639	1.54807	0.00293499	0.0419111	MSTRG.12201.1	901	---NA---	Medtr3g104555.1_hypothetical_protein_HC_chr3:48173141-48172872_20140818
94.7117	1.54681	6.05e-05	0.00266345	MSTRG.2581.11	934	SEC14 cytosolic factor family protein	Medtr4g013300.1_SEC14_cytosolic_factor_family_protein_HC_chr4:3713580-3710569_20140818
94.5656	1.54589	0.00033437	0.00928182	MSTRG.66388.5	710	hypothetical protein MTR_6g463490	Medtr6g463490.1_hypothetical_protein_LC_chr6:22015768-22016240_20140818
45.5002	1.54583	0.0013358	0.02447	MSTRG.23382.1	470	---NA---	Medtr7g062720.1_Copia-like_polyprotein/retrotransposon,_putative_LC_chr7:22824311-22825240_20140818
123.9	1.54425	2.41e-08	5.45e-06	MSTRG.76014.2	1340	---NA---	---NA---
83.5636	1.54419	7.47e-07	8.96e-05	MSTRG.11937.1	255	---NA---	---NA---
57.5852	1.54331	0.000362012	0.00983232	MSTRG.87364.1	2810	Retrovirus-related Pol polyprotein from transposon TNT 1-94	Medtr4g046673.1_hypothetical_protein_LC_chr4:16453842-16455341_20140818
70.0646	1.54316	1.88e-05	0.00110192	MSTRG.15789.4	1151	papain family cysteine protease	Medtr3g082370.1_papain_family_cysteine_protease_LC_chr3:37174517-37176618_20140818
102.07	1.54246	0.00258973	0.0385071	MSTRG.83466.1	2433	5'-3' exoribonuclease 3-like	Medtr4g051920.1_5'-3'_exoribonuclease_HC_chr4:18782027-18788114_20140818
62.6681	1.54185	5.49e-05	0.00248296	94876_t	3384	disease resistance protein (CC-NBS-LRR class) family protein	Medtr3g021380.1_NBS-LRR_type_disease_resistance_protein_LC_chr3:6260285-6256594_20140818
64.1299	1.54103	1.32e-05	0.000845229	48852_t	2700	swarming motility protein ybiA	Medtr1g018830.1_hypothetical_protein_HC_chr1:5545314-5542120_20140818
379.63	1.5405	8.8e-06	0.000610261	MSTRG.24272.2	917	transmembrane protein, putative	Medtr5g080330.1_aspartic_protease_family_protein,_putative_LC_chr5:34380900-34377963_20140818
73.93	1.54027	6.85e-05	0.00292691	MSTRG.72191.1	202	---NA---	---NA---
124.142	1.54001	4.82e-05	0.00225517	MSTRG.46079.2	298	catalase heme-binding enzyme	Medtr3g115370.1_catalase_heme-binding_enzyme_HC_chr3:53951098-53955670_20140818
46.8597	1.53871	0.000438751	0.0112742	MSTRG.24571.7	1040	AGC kinase	Medtr1g042700.1_AGC_kinase_HC_chr1:15872146-15867493_20140818
317.234	1.53821	7.75e-06	0.000551505	MSTRG.55654.6	2043	hypothetical protein MTR_5g010555	Medtr5g010555.1_hypothetical_protein_HC_chr5:2852736-2852280_20140818
47.1041	1.53765	8.16e-05	0.00332017	MSTRG.77099.1	486	probable signal peptidase complex subunit 1	Medtr3g085510.1_microsomal_signal_peptidase_12_kDa_protein_HC_chr3:38636315-38638148_20140818
125.681	1.53554	0.00276435	0.0402347	MSTRG.60030.1	701	---NA---	---NA---
70.022	1.53251	0.000134424	0.0047885	MSTRG.66883.1	1165	hypothetical protein MTR_2g438310	Medtr2g438310.1_hypothetical_protein_HC_chr2:15450544-15449032_20140818
477.653	1.53186	3.58e-08	7.48e-06	MSTRG.78112.5	2405	HAT family dimerization domain containing protein	Medtr3g028350.1_hypothetical_protein_LC_chr3:8989418-8988833_20140818
316.157	1.5317	0.00374204	0.049254	MSTRG.82288.8	1827	adenine nucleotide alpha hydrolase superfamily protein	Medtr1g054765.1_adenine_nucleotide_alpha_hydrolase_superfamily_protein_HC_chr1:23937943-23936722_20140818
96.2547	1.53167	0.00147329	0.0262352	MSTRG.2537.2	1252	---NA---	---NA---
220.965	1.53162	3.38e-05	0.00173482	MSTRG.61467.1	367	nitrile-specifier protein 5-like	Medtr2g069030.1_galactose_oxidase/kelch_repeat_protein_HC_chr2:28678549-28675729_20140818
79.9382	1.53028	3.23e-05	0.00167586	MSTRG.15789.5	1288	papain family cysteine protease	Medtr3g082370.1_papain_family_cysteine_protease_LC_chr3:37174517-37176618_20140818
39.2486	1.52835	0.00188154	0.0310064	125446_t	1155	PIF1-like helicase	Medtr5g087830.1_PIF1-like_helicase_HC_chr5:38096392-38095511_20140818
81.8841	1.52832	0.000522313	0.0127189	MSTRG.52933.8	2479	glycoside hydrolase family 79 amino-terminal domain protein	Medtr4g109300.1_glycoside_hydrolase_family_79_amino-terminal_domain_protein_HC_chr4:45387586-45390508_20140818
108.32	1.52741	0.000130468	0.00469292	185506_t	402	non-symbiotic hemoglobin 1	Medtr4g068860.1_Non-symbiotic_hemoglobin_HC_chr4:25846162-25844617_20140818
110.052	1.52722	2.51e-07	3.76e-05	41192_t	345	---NA---	---NA---
64.6693	1.52602	0.00018735	0.00611175	MSTRG.86570.1	796	Ulp1 protease family, carboxy-terminal domain protein	Medtr0002s1270.1_Ulp1_protease_family,_carboxy-terminal_domain_protein_HC_scaffold0002:485787-483700_20140818
57.1804	1.52601	0.000947753	0.0194422	MSTRG.20673.1	842	GDSL esterase/lipase At4g10955-like	Medtr5g028370.2_GDSL_esterase/lipase_plant-like_protein_HC_chr5:11874951-11872280_20140818
121.938	1.52531	6.99e-05	0.00296957	MSTRG.45787.5	1242	kinesin motor domain protein	Medtr4g123730.1_kinesin_motor_domain_protein_HC_chr4:50983207-50995376_20140818
36.5122	1.52476	0.00143535	0.0257691	MSTRG.500.1	592	---NA---	---NA---
41.3477	1.52413	0.00338068	0.0460878	MSTRG.56074.1	234	---NA---	---NA---
88.4958	1.52333	1.96e-05	0.00113659	MSTRG.65735.3	535	ankyrin repeat and zinc finger protein, putative	Medtr7g075185.1_ankyrin_repeat_and_zinc_finger_protein,_putative_LC_chr7:28229985-28216076_20140818
32.3303	1.52331	0.00067622	0.0153048	135960_t	2814	LRR and NB-ARC domain disease resistance protein	Medtr3g055870.1_LRR_and_NB-ARC_domain_disease_resistance_protein_LC_chr3:22186461-22189188_20140818
69.826	1.52297	0.00320474	0.0444162	MSTRG.48733.3	1025	putative cyclin-D6-1	Medtr2g011500.1_carboxy-terminal_domain_cyclin_HC_chr2:2803180-2800861_20140818
340.046	1.52128	1.78e-05	0.00106159	129102_t	660	core histone H2A/H2B/H3/H4	Medtr4g128150.1_core_histone_H2A/H2B/H3/H4_LC_chr4:53328594-53330943_20140818
522.595	1.52119	1.33e-07	2.22e-05	134579_t	342	HMG1/2-like protein	Medtr8g073345.2_high_mobility_group_(HMG)-box_protein_HC_chr8:31116058-31114418_20140818
171.775	1.52086	0.000188313	0.00612909	162015_t	3222	disease resistance protein (TIR-NBS-LRR class), putative	Medtr4g080777.1_disease_resistance_protein_(TIR-NBS-LRR_class),_putative_LC_chr4:31243045-31248009_20140818
66.7857	1.52033	1.09e-05	0.000723493	193975_t	522	copper ion-binding protein, putative	Medtr3g108090.1_copper_ion-binding_protein,_putative_HC_chr3:49949697-49946875_20140818
162.163	1.51985	0.00301554	0.0426565	MSTRG.20666.5	684	transmembrane protein, putative	Medtr3g016080.1_transmembrane_protein,_putative_LC_chr3:4763213-4761952_20140818
93.6048	1.51974	0.00192467	0.0314562	46466_t	2793	frigida-LIKE protein	Medtr2g091280.1_myosin_heavy_chain-like_protein,_putative_LC_chr2:39416847-39414655_20140818
10264	1.51799	0.000241219	0.00731362	MSTRG.15076.4	210	---NA---	Medtr2g035320.1_ABA-responsive_protein_HC_chr2:13553595-13555035_20140818
49.9973	1.5179	0.002955	0.0420985	MSTRG.22748.1	305	---NA---	---NA---
118.747	1.51736	0.000347044	0.00953852	MSTRG.79113.3	2673	E3 ubiquitin protein ligase RIN2	Medtr3g007760.1_E3_ubiquitin_protein_ligase_RIN2_HC_chr3:1166460-1173444_20140818
40.3698	1.51699	0.00108479	0.0212933	MSTRG.88886.6	339	germin family protein	Medtr4g017050.1_germin_family_protein_HC_chr4:5287228-5286312_20140818
57.4576	1.51677	0.000205502	0.00652929	MSTRG.15789.3	1187	papain family cysteine protease	Medtr3g082370.1_papain_family_cysteine_protease_LC_chr3:37174517-37176618_20140818
62.2156	1.51624	0.000143686	0.00503608	MSTRG.53181.3	1165	hypothetical protein MTR_5g027710	Medtr5g027710.1_hypothetical_protein_LC_chr5:11562348-11562046_20140818
47.3475	1.51598	0.00339372	0.0461965	MSTRG.26793.6	839	hypothetical protein VIGAN_03082000, partial	hypothetical protein VIGAN_03082000, partial
42.7648	1.51577	0.00306743	0.0431658	MSTRG.53153.3	513	ABC transporter family protein, putative	Medtr2g450200.1_ABC_transporter_family_protein,_putative_LC_chr2:22144751-22142842_20140818
45.5537	1.51575	0.000304394	0.00867341	162546_t	2124	isoleucine--tRNA ligase, chloroplastic/mitochondrial	Medtr2g436760.1_isoleucine-tRNA_ligase_HC_chr2:14336824-14349112_20140818
101.37	1.51482	0.000806321	0.017268	MSTRG.80444.1	870	---NA---	---NA---
51.2984	1.51409	0.00241064	0.0367038	MSTRG.39580.15	935	---NA---	---NA---
278.947	1.51384	0.000576613	0.0136348	8074_t	687	ubiquitin family protein	Medtr1g012210.1_ubiquitin_family_protein_LC_chr1:2382883-2382131_20140818
46.6626	1.51316	0.00278919	0.0405087	MSTRG.82235.1	721	BON1-associated-like protein	Medtr8g432370.1_BON1-associated-like_protein_HC_chr8:12235117-12235990_20140818
421.584	1.5131	5.91e-05	0.00262183	MSTRG.87739.3	944	synaptobrevin-like protein	Medtr7g058640.1_synaptobrevin-like_protein_HC_chr7:21214758-21216356_20140818
75.417	1.51224	0.000702862	0.0157308	MSTRG.87364.2	794	serine/threonine protein phosphatase 2A 55 kDa regulatory subunit B beta isoform isoform X1	Medtr1g040810.1_protein_phosphatase_2A_55_kDa_regulatory_subunit_B_HC_chr1:18464856-18466358_20140818
68.6096	1.51168	0.00257287	0.0383079	MSTRG.42226.2	292	1-aminocyclopropane-1-carboxylate oxidase-like protein	Medtr8g009110.1_1-aminocyclopropane-1-carboxylate_oxidase-like_protein_HC_chr8:2032536-2035160_20140818
439.5	1.51095	1.25e-08	3.17e-06	MSTRG.78112.3	2790	HAT family dimerization domain containing protein	Medtr3g028350.1_hypothetical_protein_LC_chr3:8989418-8988833_20140818
63.1722	1.50997	0.00159719	0.027775	MSTRG.20170.2	759	transcription factor MYB108-like	Medtr4g123040.1_myb_transcription_factor_HC_chr4:50778712-50776703_20140818
102.833	1.50927	0.000135597	0.00481218	MSTRG.20038.5	618	---NA---	---NA---
41.2739	1.50922	0.00173219	0.0293552	MSTRG.23383.1	420	---NA---	Medtr7g062720.1_Copia-like_polyprotein/retrotransposon,_putative_LC_chr7:22824311-22825240_20140818
182.436	1.5092	3.84e-05	0.00190459	57501_t	1863	long-chain-alcohol oxidase FAO4A-like	Medtr8g072210.1_long-chain-alcohol_oxidase_FAO1-like_protein_HC_chr8:30490402-30496365_20140818
337.818	1.50873	3.33e-05	0.00171302	MSTRG.80450.3	919	transmembrane protein, putative	Medtr3g015420.1_transmembrane_protein,_putative_HC_chr3:4461069-4459937_20140818
92.5425	1.50812	0.00226701	0.0351948	MSTRG.38504.1	2919	frigida-LIKE protein	Medtr2g091280.1_myosin_heavy_chain-like_protein,_putative_LC_chr2:39416847-39414655_20140818
168.945	1.50806	2.74e-06	0.000247482	MSTRG.78112.2	2218	HAT family dimerization domain containing protein	Medtr3g028350.1_hypothetical_protein_LC_chr3:8989418-8988833_20140818
43.6617	1.50802	0.000485798	0.0120929	MSTRG.65869.8	438	---NA---	---NA---
50.2414	1.50764	0.000958048	0.0195705	MSTRG.10918.4	1178	eukaryotic translation initiation factor 3 subunit E	Medtr1g051820.1_eukaryotic_translation_initiation_factor_3E_HC_chr1:20721759-20717970_20140818
96.695	1.50737	0.000325904	0.00910051	MSTRG.1642.4	742	---NA---	---NA---
68.51	1.50698	3.73e-06	0.000315471	MSTRG.57314.5	678	G-type lectin S-receptor-like serine/threonine-protein kinase At4g03230	Medtr0148s0080.1_S-locus_lectin_kinase_family_protein_HC_scaffold0148:28890-24847_20140818
76.7092	1.50604	9.5e-05	0.00372698	MSTRG.53165.2	521	topless-like protein	Medtr7g007420.1_hypothetical_protein_LC_chr7:1478287-1479232_20140818
82.2788	1.50555	4.46e-05	0.00212467	MSTRG.29285.1	277	cytochrome P450 family 71 protein	Medtr1g023700.1_cytochrome_P450_family_71_protein_HC_chr1:7624049-7622290_20140818
172.697	1.5054	4.53e-07	6.01e-05	106555_t	717	RNA-binding protein 8A	Medtr5g008890.1_RNA-binding_(RRM/RBD/RNP_motif)_family_protein_HC_chr5:1976757-1981316_20140818
91.8871	1.50511	0.00226033	0.0351159	168529_t	3108	disease resistance protein (TIR-NBS-LRR class)	Medtr6g015730.1_disease_resistance_protein_(TIR-NBS-LRR_class)_LC_chr6:5392461-5398787_20140818
957.722	1.50498	0.00285361	0.0411741	MSTRG.20666.7	444	transmembrane protein, putative	Medtr3g016080.1_transmembrane_protein,_putative_LC_chr3:4763213-4761952_20140818
1822.88	1.50346	1.54e-06	0.000157736	MSTRG.12407.1	267	cytochrome P450 family 96 protein, putative	Medtr1g040210.1_hypothetical_protein_LC_chr1:14683979-14683745_20140818
295.348	1.50309	0.000221898	0.00690159	MSTRG.88367.6	4527	modifier OF SNC1 1, putative	Medtr3g077440.3_modifier_OF_SNC1_1,_putative_HC_chr3:34767662-34777932_20140818
97.5444	1.50297	0.00266438	0.0392257	MSTRG.69901.1	1683	---NA---	---NA---
75.44	1.50281	0.00100182	0.020159	MSTRG.87732.1	512	---NA---	---NA---
1832.5	1.50163	0.000673639	0.015262	MSTRG.13785.1	496	epoxide hydrolase	Medtr7g112910.1_alpha/beta_hydrolase_family_protein_HC_chr7:46465047-46464030_20140818
51.4483	1.50063	0.000107116	0.00406144	MSTRG.74696.6	535	S-adenosylmethionine decarboxylase proenzyme	Medtr7g018290.1_S-adenosylmethionine_decarboxylase_proenzyme_HC_chr7:5904875-5902194_20140818
152.952	1.50057	2.18e-05	0.00123251	MSTRG.53165.1	667	topless-like protein	Medtr7g007420.1_hypothetical_protein_LC_chr7:1478287-1479232_20140818
39.9853	1.50037	0.00357235	0.0477717	MSTRG.25453.2	458	---NA---	---NA---
52.9265	1.49955	0.000101176	0.003902	66028_t	411	chaperone protein dnaJ chloroplastic-like	Medtr8g075780.1_chaperone_DnaJ_domain_protein_HC_chr8:32039181-32040099_20140818
989.404	1.49895	0.00215375	0.0339469	MSTRG.48197.1	1324	---NA---	---NA---
1109.2	1.49858	2.39e-09	8.17e-07	MSTRG.57218.2	270	aquaporin	Medtr7g103030.1_tonoplast_intrinsic_protein_HC_chr7:41419534-41417358_20140818
52.4771	1.49848	0.00299775	0.0424859	MSTRG.37842.1	374	glycoside hydrolase family 1 protein	Medtr4g016920.3_glycoside_hydrolase_family_1_protein_HC_chr4:5220794-5215987_20140818
128.943	1.49756	4.27e-07	5.73e-05	45526_t	447	hypothetical protein MTR_7g082760	Medtr7g082760.1_hypothetical_protein_HC_chr7:31729689-31730586_20140818
605.91	1.49729	1.39e-08	3.42e-06	43436_t	447	60S acidic ribosomal protein	Medtr1g060600.1_60S_acidic_ribosomal_protein_HC_chr1:26385779-26387969_20140818
114.67	1.49584	1.12e-05	0.000737909	MSTRG.12641.5	674	---NA---	---NA---
45.2805	1.49416	3.97e-05	0.0019545	MSTRG.85109.2	398	---NA---	---NA---
8606.79	1.49291	0.000170335	0.00571164	MSTRG.26383.1	335	hypothetical protein MELLADRAFT_90079	Medtr0055s0130.1_hypothetical_protein_HC_scaffold0055:73353-68450_20140818
70.6422	1.49279	0.000106418	0.00404181	MSTRG.3796.1	724	---NA---	Medtr4g094218.1_hypothetical_protein_HC_chr4:37468144-37466253_20140818
76.117	1.49235	0.0001503	0.00520331	MSTRG.1642.1	823	70 kDa peptidyl-prolyl isomerase	Medtr8g027210.1_hypothetical_protein_LC_chr8:9511117-9510492_20140818
35.1805	1.49207	0.00177973	0.0298818	MSTRG.21472.1	916	Retrovirus-related Pol polyprotein from transposon TNT 1-94	Medtr2g460640.1_hypothetical_protein_LC_chr2:24996058-25036377_20140818
92.3752	1.49181	1.08e-05	0.000715349	MSTRG.41554.1	1778	TPX2 (targeting protein for Xklp2) family protein	Medtr1g075310.1_TPX2_(targeting_protein_for_Xklp2)_family_protein_HC_chr1:33342141-33338595_20140818
216.503	1.49126	0.000546147	0.0131097	MSTRG.68405.46	787	TRAF superfamily protein, putative	Medtr8g089030.2_TRAF_superfamily_protein,_putative_LC_chr8:37006804-36995677_20140818
712.429	1.49087	0.00359511	0.0479729	66807_t	624	transmembrane protein, putative	Medtr5g036520.1_transmembrane_protein,_putative_LC_chr5:15935958-15934992_20140818
137.026	1.49076	3.14e-06	0.000275251	39216_t	642	DUF761 domain protein	Medtr1g053900.1_DUF761_domain_protein_HC_chr1:22870671-22869609_20140818
149.382	1.49015	0.00118155	0.0226042	MSTRG.4625.2	1335	tRNA-splicing endonuclease subunit Sen54-like isoform X1	Medtr8g090105.1_tRNA-splicing_endonuclease_subunit_sen54_amino-terminal_protein_HC_chr8:37741275-37738113_20140818
57.1693	1.48903	0.00122832	0.0231417	MSTRG.62537.1	1242	PREDICTED: uncharacterized protein LOC101505019, partial	PREDICTED: uncharacterized protein LOC101505019, partial
70.1375	1.48883	2.5e-05	0.00137138	MSTRG.13559.3	206	hypothetical protein LR48_Vigan442s004500	hypothetical protein LR48_Vigan442s004500
55.4354	1.48841	0.000679573	0.0153583	MSTRG.87583.1	953	---NA---	Medtr1g085600.1_hypothetical_protein_HC_chr1:38240615-38237478_20140818
357.871	1.48679	4.63e-05	0.00218465	MSTRG.17938.1	1293	WRKY family transcription factor	Medtr1g015140.1_WRKY_family_transcription_factor_HC_chr1:3734958-3734089_20140818
56.5666	1.48536	0.000168867	0.00567359	MSTRG.53165.6	405	ABC transporter B family member	Medtr7g007420.1_hypothetical_protein_LC_chr7:1478287-1479232_20140818
223.463	1.485	0.000525444	0.0127651	MSTRG.60233.7	2103	pre-mRNA-splicing factor ATP-dependent RNA helicase	Medtr6g007360.1_hypothetical_protein_HC_chr6:1576905-1572672_20140818
53.949	1.4847	0.00243457	0.0369591	MSTRG.48518.1	398	---NA---	Medtr4g057880.1_hypothetical_protein_HC_chr4:21380490-21380714_20140818
92.8329	1.48382	6.19e-05	0.00271187	MSTRG.1642.3	655	---NA---	---NA---
98.7125	1.48375	1.1e-06	0.000121654	MSTRG.65735.2	809	ankyrin repeat and zinc finger protein, putative	Medtr7g075185.1_ankyrin_repeat_and_zinc_finger_protein,_putative_LC_chr7:28229985-28216076_20140818
66.5054	1.48307	0.000171969	0.00575168	MSTRG.21446.1	1129	F-box protein interaction domain protein	Medtr4g055060.1_F-box_protein_interaction_domain_protein_LC_chr4:20020726-20019557_20140818
820.869	1.48227	2.02e-07	3.15e-05	MSTRG.21686.7	1371	stress up-regulated Nod 19 protein	Medtr4g094570.1_stress_up-regulated_Nod_19_protein_HC_chr4:38255058-38252424_20140818
215.547	1.48156	0.000541011	0.0130106	MSTRG.68405.15	787	TRAF superfamily protein, putative	Medtr8g089030.2_TRAF_superfamily_protein,_putative_LC_chr8:37006804-36995677_20140818
73.9606	1.48118	0.00142979	0.0257116	97432_t	1878	heavy metal transport/detoxification superfamily protein	Medtr1g099825.1_hypothetical_protein_HC_chr1:45056995-45054222_20140818
53.3507	1.47954	0.00234794	0.0360253	MSTRG.45046.5	879	XIAP-associated factor 1	Medtr3g111440.1_TRAF-type_zinc_finger_protein_HC_chr3:52079851-52076347_20140818
195.37	1.479	0.000594896	0.013945	MSTRG.68405.44	894	TRAF superfamily protein, putative	Medtr8g089030.2_TRAF_superfamily_protein,_putative_LC_chr8:37006804-36995677_20140818
115.365	1.47862	1.16e-06	0.000126723	MSTRG.61957.1	1914	F-box protein	Medtr1g100280.1_F-box_protein_LC_chr1:45195549-45196942_20140818
42.2338	1.4784	0.00262368	0.0388442	110198_t	2058	serine/threonine protein kinase SRPK1	Medtr8g085590.1_DUF538_family_protein_HC_chr8:35457713-35458482_20140818
81.0369	1.47645	3.49e-05	0.00177717	MSTRG.18770.11	594	poly(ADP-ribose) polymerase domain protein	Medtr4g053530.1_poly(ADP-ribose)_polymerase_domain_protein_HC_chr4:19342499-19346920_20140818
209.25	1.47634	0.000959826	0.0195939	MSTRG.68405.24	2350	TRAF superfamily protein, putative	Medtr8g089030.2_TRAF_superfamily_protein,_putative_LC_chr8:37006804-36995677_20140818
228.438	1.4763	3.65e-07	5.04e-05	MSTRG.78112.6	1329	HAT family dimerization domain containing protein	Medtr7g105550.1_hypothetical_protein_HC_chr7:42807417-42807019_20140818
2528.11	1.47491	1.95e-10	9.94e-08	MSTRG.32696.2	479	hypothetical protein MTR_7g065130	Medtr7g065130.1_hypothetical_protein_HC_chr7:23733151-23734236_20140818
1989.77	1.47338	0.00029515	0.00848335	MSTRG.55144.3	454	polygalacturonase inhibitor protein	Medtr7g023670.1_polygalacturonase_inhibiting_protein,_putative_LC_chr7:7731931-7730805_20140818
63.9595	1.47141	0.0031976	0.0443665	MSTRG.6299.2	234	---NA---	---NA---
47.6793	1.47078	0.000795256	0.0171154	41223_t	1479	cysteine-rich receptor-kinase-like protein	Medtr1g105655.1_cysteine-rich_receptor-kinase-like_protein_HC_chr1:47638290-47641699_20140818
107.14	1.47057	0.000134704	0.00479381	MSTRG.78655.2	268	---NA---	---NA---
210.183	1.47054	0.000473469	0.0118922	MSTRG.68405.16	791	TRAF superfamily protein, putative	Medtr8g089030.2_TRAF_superfamily_protein,_putative_LC_chr8:37006804-36995677_20140818
57.6161	1.4702	0.000276009	0.00806029	MSTRG.78525.1	469	---NA---	---NA---
1085.7	1.4698	4.64e-06	0.000370826	36599_t	936	soluble N-ethylmaleimide-sensitive factor adaptor protein	Medtr3g023720.1_soluble_N-ethylmaleimide-sensitive_factor_adaptor_protein_HC_chr3:7218102-7214079_20140818
174.192	1.46971	5.2e-06	0.000406238	MSTRG.63497.1	476	---NA---	---NA---
89.9408	1.46943	7.74e-05	0.00319222	MSTRG.17104.1	1653	F-box-like protein	Medtr1g025830.1_F-box-like_protein_LC_chr1:8301266-8300592_20140818
228.593	1.46921	0.000154807	0.00531594	MSTRG.842.26	1745	phospholipase A-2-activating protein	Medtr4g069090.1_phospholipase_A-2-activating_protein_HC_chr4:25969004-25956257_20140818
103.338	1.46891	0.000280307	0.00815637	MSTRG.77487.2	867	complex 1 LYR-like protein	Medtr6g068850.1_complex_1_LYR-like_protein_HC_chr6:24744886-24747929_20140818
1149.6	1.46874	0.00278219	0.0404374	MSTRG.9369.1	1205	transmembrane protein, putative	Medtr5g036520.1_transmembrane_protein,_putative_LC_chr5:15935958-15934992_20140818
54.4393	1.4685	0.00127205	0.0237167	182222_t	843	RNA recognition motif	Medtr1g109310.1_hypothetical_protein_HC_chr1:49430047-49428295_20140818
130.59	1.4681	0.000154358	0.00530901	MSTRG.63497.2	285	---NA---	---NA---
65.8251	1.46702	0.00298452	0.0423569	MSTRG.63689.2	214	---NA---	---NA---
232.06	1.466	6.49e-05	0.00281283	MSTRG.53165.3	945	topless-like protein	Medtr7g007420.1_hypothetical_protein_LC_chr7:1478287-1479232_20140818
102.314	1.46574	0.000594097	0.0139343	MSTRG.28257.8	801	zinc-binding alcohol dehydrogenase family protein	Medtr3g089970.1_zinc-binding_alcohol_dehydrogenase_family_protein_HC_chr3:40898627-40901003_20140818
2519.92	1.465	1.36e-06	0.000143949	MSTRG.76785.1	217	cytochrome P450 family 96 protein, putative	Medtr5g019820.1_hypothetical_protein_LC_chr5:7525320-7524963_20140818
51.4531	1.46495	0.000331931	0.00923386	183500_t	585	esterase/lipase/thioesterase family protein	Medtr2g039480.1_esterase/lipase/thioesterase_family_protein_HC_chr2:17302990-17297098_20140818
97.1106	1.4645	0.00112544	0.0218464	MSTRG.55642.2	317	---NA---	---NA---
70.9357	1.4644	0.00381693	0.04996	MSTRG.84561.1	328	---NA---	---NA---
88.1547	1.46407	1.9e-05	0.00111078	MSTRG.15789.7	1408	papain family cysteine protease	Medtr3g082370.1_papain_family_cysteine_protease_LC_chr3:37174517-37176618_20140818
334.14	1.46395	1.01e-05	0.000681575	MSTRG.82734.1	1505	cytochrome P450 84A1-like	Medtr8g076290.1_cytochrome_P450_family_monooxygenase_HC_chr8:32316653-32312590_20140818
175.48	1.46385	0.000429167	0.0111053	MSTRG.59040.1	1159	MEI2-like protein, putative	Medtr3g462100.1_MEI2-like_protein,_putative_LC_chr3:24762802-24761878_20140818
118.315	1.46335	1.79e-05	0.00106431	MSTRG.12641.2	765	---NA---	---NA---
518.171	1.46335	1.45e-09	5.3e-07	MSTRG.52892.2	1430	WRKY family transcription factor	Medtr3g106060.1_WRKY_family_transcription_factor_HC_chr3:48926808-48922741_20140818
344.582	1.46334	1.12e-07	1.96e-05	18912_t	2010	HAT family dimerization domain containing protein	Medtr3g028350.1_hypothetical_protein_LC_chr3:8989418-8988833_20140818
93.2063	1.46101	0.000157258	0.00538336	84353_t	777	protein SRC2-like	Medtr4g119780.1_C2_domain_protein_HC_chr4:49623846-49624891_20140818
73.4413	1.46099	1.36e-05	0.000860672	MSTRG.83961.8	900	UDP-glucosyltransferase family protein	Medtr5g072820.1_UDP-glucosyltransferase_family_protein_HC_chr5:30989979-30993244_20140818
244.248	1.46098	1.78e-05	0.00105869	MSTRG.85110.1	1474	very-long-chain 3-oxoacyl-CoA reductase 1-like	Medtr3g086210.1_enoyl-(acyl_carrier)_reductase_HC_chr3:39005512-39008234_20140818
214.453	1.46055	1.16e-08	2.99e-06	MSTRG.22286.1	3295	NB-ARC domain disease resistance protein	Medtr5g070960.1_disease_resistance_protein_RGA4_HC_chr5:30062044-30058913_20140818
111.56	1.46003	5.72e-06	0.000434784	MSTRG.15016.4	835	cinnamyl alcohol dehydrogenase	Medtr8g062440.3_cinnamyl_alcohol_dehydrogenase_HC_chr8:26099734-26103927_20140818
253.68	1.45935	1.65e-05	0.0010007	MSTRG.2024.1	2875	long-chain-alcohol oxidase FAO4A-like	Medtr8g072210.1_long-chain-alcohol_oxidase_FAO1-like_protein_HC_chr8:30490402-30496365_20140818
185.621	1.45785	5.37e-06	0.000415087	MSTRG.45787.2	1709	kinesin motor domain protein	Medtr4g123730.1_kinesin_motor_domain_protein_HC_chr4:50983207-50995376_20140818
75.0348	1.45759	7.08e-06	0.000515501	MSTRG.24295.6	282	hypothetical protein MTR_3g112250	Medtr3g112250.1_hypothetical_protein_HC_chr3:52563593-52563169_20140818
48.077	1.45701	0.000361113	0.00981996	MSTRG.61628.27	1517	disease resistance protein (TIR-NBS-LRR class)	Medtr6g074875.1_disease_resistance_protein_(TIR-NBS-LRR_class)_LC_chr6:27718819-27713865_20140818
41.7784	1.45667	0.000319804	0.008989	134783_t	2100	exocyst complex component	Medtr5g073460.1_exocyst_subunit_exo70_family_protein_LC_chr5:31279734-31277369_20140818
303.029	1.45614	3.44e-07	4.81e-05	MSTRG.35586.1	2016	hexose carrier protein HEX6-like	Medtr3g008170.1_sugar_porter_(SP)_family_MFS_transporter_HC_chr3:1355011-1357152_20140818
138.637	1.45612	9.99e-05	0.00387166	MSTRG.45787.4	1300	phragmoplast orienting kinesin-1	Medtr4g123730.1_kinesin_motor_domain_protein_HC_chr4:50983207-50995376_20140818
144.894	1.45555	3.46e-05	0.00176516	190320_t	846	selT-like protein	Medtr5g071240.1_selT/selW/selH_selenoprotein_domain_protein_HC_chr5:30212148-30215450_20140818
46.1494	1.45495	0.00134166	0.0245298	MSTRG.62650.1	464	---NA---	Medtr0058s0140.1_hypothetical_protein_LC_scaffold0058:67952-68565_20140818
82.8019	1.45486	5.36e-06	0.000414617	MSTRG.3143.1	3149	swarming motility protein ybiA	Medtr1g018830.1_hypothetical_protein_HC_chr1:5545314-5542120_20140818
54.0933	1.45416	0.00204134	0.0327679	MSTRG.89064.1	611	transmembrane protein, putative	Medtr4g050830.1_transmembrane_protein,_putative_HC_chr4:18049440-18049784_20140818
38.9922	1.45389	0.000365031	0.00989006	MSTRG.5675.3	861	---NA---	---NA---
114.528	1.45386	6.96e-05	0.00295888	MSTRG.7233.2	269	pectin methylesterase	Medtr7g050980.1_pectinesterase/pectinesterase_inhibitor_HC_chr7:17820159-17822765_20140818
34.3239	1.45339	0.000568911	0.0135117	MSTRG.42648.3	640	transducin/WD40 repeat protein	Medtr1g081830.2_transducin/WD40_repeat_protein_HC_chr1:36423916-36438661_20140818
918.896	1.45229	3.22e-05	0.00167243	MSTRG.56219.1	603	polygalacturonase inhibitor protein	Medtr7g023690.1_polygalacturonase_inhibitor_protein_LC_chr7:7740066-7739073_20140818
64.3094	1.45169	1.63e-05	0.000991839	MSTRG.57104.5	1286	abscisic-aldehyde oxidase-like protein	Medtr5g087390.1_indole-3-acetaldehyde_oxidase_HC_chr5:37865280-37857588_20140818
80.6695	1.45082	0.000233522	0.00715257	58397_t	4605	reverse transcriptase	Medtr1g015140.1_WRKY_family_transcription_factor_HC_chr1:3734958-3734089_20140818
89.8569	1.44934	0.000204772	0.00651545	MSTRG.1343.2	923	---NA---	Medtr2g055850.1_DEAD-box_ATP-dependent_RNA_helicase-like_protein_HC_chr2:23956977-23948909_20140818
811.653	1.44927	8.97e-08	1.63e-05	86157_t	1476	protease 2-like protein	Medtr1g115230.1_prolyl_oligopeptidase_family_protein_HC_chr1:51929794-51923027_20140818
118.853	1.44814	6.23e-05	0.00272659	MSTRG.45787.3	1361	kinesin motor domain protein	Medtr4g123730.1_kinesin_motor_domain_protein_HC_chr4:50983207-50995376_20140818
441.368	1.44797	2.26e-05	0.00126246	36088_t	1542	fructan exohydrolase	Medtr1g015970.1_fructan_exohydrolase_HC_chr1:4139183-4135963_20140818
55.7469	1.44787	0.00155795	0.0272755	MSTRG.716.2	641	---NA---	---NA---
223.398	1.44713	3.64e-08	7.56e-06	36275_t	715	60S ribosomal L35-like protein	Medtr5g012010.1_syntaxin_of_plants_122_protein_HC_chr5:3548008-3546326_20140818
72.6692	1.44701	0.000265509	0.00785019	MSTRG.22349.1	812	leguminosin group485 secreted peptide	Medtr5g077290.1_leguminosin_group485_secreted_peptide_HC_chr5:33000236-32998991_20140818
95.8863	1.44609	3.71e-05	0.00186171	MSTRG.83577.1	275	---NA---	---NA---
120.717	1.44606	1.93e-05	0.00112204	MSTRG.25317.2	5165	disease resistance protein (TIR-NBS-LRR class), putative	Medtr4g020590.1_disease_resistance_protein_(TIR-NBS-LRR_class),_putative_LC_chr4:6594472-6586360_20140818
88.7196	1.44449	8.33e-05	0.00336796	MSTRG.40860.1	1015	structural constituent of ribosome protein, putative	Medtr2g021040.2_structural_constituent_of_ribosome_protein,_putative_HC_chr2:7107810-7113276_20140818
43.3463	1.44437	0.00273473	0.039942	MSTRG.16533.1	240	---NA---	---NA---
79.7737	1.44182	0.00205206	0.032869	MSTRG.57607.2	1168	adipocyte plasma membrane-associated-like protein	Medtr2g042420.1_adipocyte_plasma_membrane-associated-like_protein_HC_chr2:18506325-18510367_20140818
770.042	1.44179	0.00136876	0.0249121	MSTRG.86655.2	4059	TRAF superfamily protein, putative	Medtr8g089030.1_TRAF_superfamily_protein,_putative_LC_chr8:37006804-36991603_20140818
55.0691	1.44147	5.03e-06	0.000394696	MSTRG.1142.7	2335	probable myosin-binding protein 5	Medtr0168s0060.1_zein-binding_protein_HC_scaffold0168:18855-21061_20140818
40.2444	1.43985	0.00213482	0.0337481	144595_t	1551	flavin containing monooxygenase FMO GS-OX-like protein	Medtr8g037910.3_flavin_containing_monooxygenase_FMO_GS-OX-like_protein_HC_chr8:14046330-14042504_20140818
80.1707	1.43949	0.000282099	0.00819949	MSTRG.45785.1	235	---NA---	---NA---
69.6975	1.43879	8.81e-06	0.000610416	MSTRG.39098.2	983	probable receptor-like protein kinase At1g49730	Medtr1g051310.1_kinase_family_protein,_putative_HC_chr1:20088196-20089024_20140818
83.2621	1.43847	0.000851491	0.017999	MSTRG.17889.2	1623	L-type lectin-domain receptor kinase IX.1	Medtr8g067735.1_L-type_lectin-domain_receptor_kinase_IX.1_HC_chr8:28295890-28293779_20140818
56.3839	1.43769	0.000425409	0.0110376	MSTRG.7026.3	318	40S ribosomal protein S19-1	Medtr3g013635.2_40S_ribosomal_protein_S19-1_HC_chr3:3697601-3703979_20140818
140.039	1.43729	0.00111724	0.021731	MSTRG.29806.1	739	hypothetical protein MTR_6g086485	Medtr6g086485.1_hypothetical_protein_HC_chr6:32537808-32537232_20140818
95.1338	1.43648	9.57e-05	0.00374566	MSTRG.58629.3	1208	TPX2 (targeting protein for Xklp2) family protein	Medtr1g075310.1_TPX2_(targeting_protein_for_Xklp2)_family_protein_HC_chr1:33342141-33338595_20140818
943.927	1.43604	5.37e-05	0.0024399	MSTRG.86655.14	3228	TRAF superfamily protein, putative	Medtr8g089030.1_TRAF_superfamily_protein,_putative_LC_chr8:37006804-36991603_20140818
65.7662	1.43603	0.00197224	0.0319873	68545_t	951	transcription factor MYB108-like	Medtr4g123040.1_myb_transcription_factor_HC_chr4:50778712-50776703_20140818
4328.78	1.43586	6.65e-06	0.000489364	MSTRG.34131.2	2927	probable galactinol--sucrose galactosyltransferase 2 isoform X1	Medtr7g091880.1_galactinol-raffinose_galactosyltransferase_HC_chr7:36372945-36367215_20140818
59.112	1.43559	0.000776797	0.0168713	MSTRG.53582.2	1546	ribonuclease H	Medtr6g016265.1_hypothetical_protein_LC_chr6:5954443-5954066_20140818
93.3899	1.4353	6.03e-06	0.000453428	19474_t	741	ankyrin repeat plant-like protein	Medtr0514s0010.1_ankyrin_repeat_plant-like_protein_LC_scaffold0514:963-215_20140818
80.2101	1.43384	0.000716774	0.0159292	MSTRG.67654.1	841	---NA---	---NA---
355.935	1.43371	0.000176532	0.005855	MSTRG.68114.5	449	---NA---	Medtr6g034930.1_hypothetical_protein_LC_chr6:12218765-12220282_20140818
269.489	1.43365	8.28e-05	0.00335149	20209_t	3972	receptor-like protein	Medtr4g032320.1_receptor-like_protein_LC_chr4:11120640-11117356_20140818
71.43	1.43346	1.74e-05	0.001045	MSTRG.76014.1	1281	---NA---	---NA---
287.153	1.43298	1.57e-08	3.8e-06	123068_t	1461	lysine ketoglutarate reductase trans-splicing protein	Medtr3g086610.1_lysine_ketoglutarate_reductase_trans-splicing_protein_HC_chr3:39259919-39264384_20140818
66.6132	1.43269	0.000118233	0.00436013	MSTRG.39098.1	980	kinase family protein, putative	Medtr1g051310.1_kinase_family_protein,_putative_HC_chr1:20088196-20089024_20140818
34.272	1.43267	0.000513813	0.0125712	61792_t	1539	AAA-ATPase At3g28580	Medtr1g022245.1_P-loop_nucleoside_triphosphate_hydrolase_superfamily_protein_HC_chr1:6967614-6969410_20140818
109.62	1.43213	2.4e-05	0.00132275	MSTRG.39415.5	2211	cysteine-rich receptor-like kinase	Medtr8g041880.1_cysteine-rich_receptor-like_kinase_HC_chr8:15802331-15798924_20140818
237.179	1.43098	0.000123256	0.00450296	82515_t	325	auxin-repressed/dormancy-associated protein	Medtr2g014240.1_auxin-repressed/dormancy-associated_protein_HC_chr2:3988602-3986182_20140818
55.8303	1.4302	0.00149805	0.026563	MSTRG.57618.2	578	---NA---	Medtr0034s0060.1_rhamnose_biosynthetic-like_enzyme_HC_scaffold0034:17359-21865_20140818
48.4703	1.42949	0.000134789	0.00479381	MSTRG.38300.5	3910	superkiller-like protein	Medtr5g004660.1_superkiller-like_protein_HC_chr5:57937-73020_20140818
397.345	1.42793	9.88e-06	0.000668719	26090_t	717	small ubiquitin-like modifier 3	Medtr3g053540.1_small_ubiquitin-like_modifier_3_HC_chr3:21293436-21291225_20140818
60.1234	1.42716	9.92e-05	0.00384906	MSTRG.46762.3	2769	disease resistance protein (TIR-NBS-LRR class)	Medtr6g027080.1_disease_resistance_protein_(TIR-NBS-LRR_class)_LC_chr6:9167437-9166142_20140818
138.631	1.42652	0.000438629	0.0112742	MSTRG.70500.1	1008	---NA---	---NA---
139.663	1.42633	0.000766239	0.0166935	29478_t	912	peroxidase family protein	Medtr2g029910.1_peroxidase_family_protein_HC_chr2:11192617-11190342_20140818
72.1893	1.42538	0.00325403	0.0449154	181396_t	1956	L-type lectin-domain receptor kinase IX.1	Medtr8g067735.1_L-type_lectin-domain_receptor_kinase_IX.1_HC_chr8:28295890-28293779_20140818
170.4	1.42441	1.12e-07	1.95e-05	MSTRG.60539.1	291	---NA---	Medtr4g064020.1_core_histone_H2A/H2B/H3/H4_HC_chr4:23885563-23886484_20140818
79.0776	1.42392	4.4e-07	5.87e-05	185832_t	495	transducin/WD40 repeat protein	Medtr7g111080.1_transducin/WD40_repeat_protein_HC_chr7:45556144-45577337_20140818
427.319	1.42366	5.26e-06	0.000408993	65978_t	1191	cytochrome P450 84A1-like	Medtr8g076290.1_cytochrome_P450_family_monooxygenase_HC_chr8:32316653-32312590_20140818
1704.46	1.42239	4.19e-06	0.000342777	MSTRG.21483.3	1103	PB1 domain protein	Medtr5g032960.1_PB1_domain_protein_HC_chr5:14201643-14199883_20140818
50.1284	1.42161	0.00141855	0.025569	MSTRG.77271.1	495	zinc finger MYM-type protein 1-like	Medtr8g032820.1_hypothetical_protein_LC_chr8:12587013-12584560_20140818
88.6464	1.42139	0.000163096	0.00553741	159858_t	309	monothiol glutaredoxin-S6	Medtr7g108250.1_monothiol_glutaredoxin-S2_protein_HC_chr7:44028079-44028466_20140818
335.174	1.42102	5.53e-06	0.0004244	MSTRG.81523.1	265	---NA---	---NA---
55.1367	1.42054	0.000280711	0.0081653	MSTRG.17024.1	263	---NA---	---NA---
155.952	1.41979	6.2e-05	0.0027148	MSTRG.78436.8	891	transmembrane protein, putative	Medtr5g080330.1_aspartic_protease_family_protein,_putative_LC_chr5:34380900-34377963_20140818
54.5714	1.41918	0.00141929	0.0255786	MSTRG.38170.1	291	---NA---	---NA---
2695.36	1.41849	2.39e-05	0.00131998	MSTRG.64982.12	797	non-symbiotic hemoglobin	Medtr4g068860.1_Non-symbiotic_hemoglobin_HC_chr4:25846162-25844617_20140818
108.281	1.41831	0.000497046	0.0122851	147260_t	444	RNA-binding (RRM/RBD/RNP motif) family protein	Medtr3g084040.1_RNA-binding_(RRM/RBD/RNP_motif)_family_protein_HC_chr3:37961723-37963823_20140818
39.9507	1.41798	0.00159458	0.0277444	173830_t	3558	cysteine-rich RLK (receptor-like kinase) protein	Medtr8g052420.1_cysteine-rich_RLK_(receptor-like_kinase)_protein_LC_chr8:19504888-19499824_20140818
92.2135	1.41769	3.64e-06	0.000309404	MSTRG.1841.5	2730	flavin containing monooxygenase FMO GS-OX-like protein	Medtr8g037910.1_flavin_containing_monooxygenase_FMO_GS-OX-like_protein_HC_chr8:14046363-14042504_20140818
385.091	1.41719	1.17e-10	6.38e-08	MSTRG.32696.1	261	hypothetical protein MTR_7g065130	Medtr7g065130.1_hypothetical_protein_HC_chr7:23733151-23734236_20140818
56.2233	1.41689	8.39e-05	0.00338857	MSTRG.39567.1	759	probable WRKY transcription factor 50	Medtr1g015140.1_WRKY_family_transcription_factor_HC_chr1:3734958-3734089_20140818
160.178	1.41644	4.44e-06	0.000357878	MSTRG.83198.1	1320	transmembrane protein, putative	Medtr8g024270.1_transmembrane_protein,_putative_LC_chr8:8902475-8901409_20140818
104.806	1.41643	0.00281416	0.0407873	MSTRG.13219.1	1070	hypothetical protein TSUD_89660	Medtr7g060170.1_hypothetical_protein_HC_chr7:21732415-21731869_20140818
40.7484	1.41571	0.00211939	0.0335692	MSTRG.55123.2	1004	meiotic recombination protein dmc1 like	Medtr1g102670.1_meiotic_recombination_protein_DMC1,_putative_HC_chr1:46400379-46403108_20140818
141.456	1.41564	1.98e-05	0.00114489	MSTRG.17199.34	1216	UPF0614 protein/C14orf102-like protein	Medtr6g472250.1_hypothetical_protein_HC_chr6:26062743-26064085_20140818
4777.02	1.41465	3.56e-06	0.000304502	MSTRG.34131.3	3058	galactinol-raffinose galactosyltransferase	Medtr7g091880.1_galactinol-raffinose_galactosyltransferase_HC_chr7:36372945-36367215_20140818
43.3079	1.41352	0.00255244	0.0381246	MSTRG.33186.1	314	F-box/RNI/FBD-like domain protein	Medtr2g008320.1_F-box/RNI/FBD-like_domain_protein_LC_chr2:1401961-1404001_20140818
376.352	1.41344	0.00319644	0.0443568	MSTRG.49994.1	863	---NA---	---NA---
112.973	1.413	9.07e-05	0.00358606	MSTRG.81890.7	1599	hypothetical protein OXYTRI_13058 (macronuclear)	Medtr0055s0120.1_senescence-associated_protein_HC_scaffold0055:62498-67419_20140818
144.687	1.4126	0.00057705	0.0136384	MSTRG.33231.1	1623	potassium transporter-like protein	Medtr5g083780.1_Nop53_(60S_ribosomal_biogenesis)_protein_HC_chr5:36146402-36142069_20140818
297.603	1.41234	2.03e-06	0.00019738	MSTRG.9276.1	1145	esterase/lipase/thioesterase family protein	Medtr2g039480.1_esterase/lipase/thioesterase_family_protein_HC_chr2:17302990-17297098_20140818
84.5106	1.4119	9.49e-07	0.000108615	MSTRG.717.1	1077	---NA---	---NA---
66.5032	1.41183	0.000121889	0.00446728	MSTRG.12973.1	3981	rhodanese/cell cycle control phosphatase superfamily protein	Medtr3g084030.3_rhodanese/cell_cycle_control_phosphatase_superfamily_protein_LC_chr3:37958414-37933056_20140818
68.9888	1.41144	0.0021392	0.0338035	MSTRG.56568.2	2682	zinc finger BED domain-containing protein RICESLEEPER 2-like	Medtr5g034530.1_hypothetical_protein_LC_chr5:14993712-14993306_20140818
81.6653	1.41104	0.000302643	0.00863621	MSTRG.26550.5	543	---NA---	---NA---
84.4465	1.41047	0.00185776	0.0307441	MSTRG.58629.6	957	LRR receptor-like kinase family protein	Medtr2g099020.1_LRR_receptor-like_kinase_family_protein_LC_chr2:42413621-42412383_20140818
73.1614	1.41018	0.000204014	0.00649935	MSTRG.17040.2	977	transmembrane protein, putative	Medtr5g057715.1_hypothetical_protein_LC_chr5:23834152-23832736_20140818
175.622	1.40955	0.000227248	0.00701588	MSTRG.35290.1	1209	viral movement protein	Medtr0116s0090.1_viral_movement_protein_HC_scaffold0116:18306-19198_20140818
902.656	1.40927	8.95e-07	0.000103804	119675_t	1713	putative nucleoredoxin 1-like protein	Medtr8g064810.1_protein_disulfide_isomerase_(PDI)-like_protein_HC_chr8:27194182-27196762_20140818
52.365	1.40898	0.000993641	0.0200526	44244_t	510	phosphatidylethanolamine-binding protein	Medtr4g017650.1_phosphatidylethanolamine-binding_protein_HC_chr4:5542811-5544084_20140818
48.2111	1.40799	0.000529669	0.0128215	MSTRG.24150.1	295	---NA---	---NA---
48.8223	1.4077	0.000980115	0.0198883	MSTRG.41787.4	548	structural constituent of ribosome protein, putative	Medtr2g021040.2_structural_constituent_of_ribosome_protein,_putative_HC_chr2:7107810-7113276_20140818
110.473	1.40767	2.43e-05	0.00133713	193889_t	1905	DEAD-box ATP-dependent RNA helicase 56	Medtr3g107420.2_DEAD-box_ATP-dependent_RNA_helicase-like_protein_HC_chr3:49555719-49558567_20140818
42.6043	1.40739	0.000340353	0.00940062	MSTRG.11039.1	1135	---NA---	---NA---
1541.76	1.40674	1.09e-10	6.02e-08	55741_t	423	hypothetical protein MTR_3g111970	Medtr3g111970.1_hypothetical_protein_HC_chr3:52391734-52393710_20140818
46.3225	1.40449	0.000476916	0.0119439	MSTRG.26793.7	731	hypothetical protein VIGAN_03082000, partial	hypothetical protein VIGAN_03082000, partial
63.5245	1.40447	0.000435058	0.0112109	MSTRG.61115.2	235	basic 7S globulin-like	Medtr4g117090.1_xyloglucanase-specific_endoglucanase_inhibitor_protein_HC_chr4:48522950-48521336_20140818
78.2995	1.40421	0.000156593	0.00536601	MSTRG.42041.4	789	flocculation protein FLO11	Medtr7g073720.1_hypothetical_protein_HC_chr7:27594597-27590526_20140818
61.2403	1.40407	0.00104866	0.0207999	MSTRG.34141.2	1286	disease resistance protein (TIR-NBS-LRR class), putative	Medtr4g036080.1_disease_resistance_protein_(TIR-NBS-LRR_class),_putative_LC_chr4:12893851-12898919_20140818
89.2071	1.40389	0.00302065	0.0426976	MSTRG.10723.1	1551	hypothetical protein MTR_5g013600	Medtr5g013600.1_hypothetical_protein_HC_chr5:4354594-4357457_20140818
270.325	1.40338	0.000597461	0.013984	MSTRG.66621.1	1075	FDB-associated F-box protein	Medtr3g019060.1_hypothetical_protein_HC_chr3:5308654-5310320_20140818
2948.72	1.40163	9.59e-07	0.000109493	87672_t	474	hypothetical protein MTR_8g037280	Medtr8g037280.1_hypothetical_protein_HC_chr8:13854559-13855960_20140818
3944.62	1.40032	0.00321996	0.0445793	MSTRG.36040.1	1587	WAT1-related protein At4g08300-like	Medtr1g030580.1_nodulin_MtN21/EamA-like_transporter_family_protein_HC_chr1:10605525-10599616_20140818
96.375	1.40013	0.00043377	0.0111852	175190_t	1863	long-chain-alcohol oxidase FAO4A-like	Medtr8g072210.1_long-chain-alcohol_oxidase_FAO1-like_protein_HC_chr8:30490402-30496365_20140818
477.857	1.40007	1.84e-07	2.9e-05	MSTRG.79195.2	736	---NA---	---NA---
361.271	1.39936	0.000112246	0.00420481	MSTRG.43380.1	1051	extensin-like region protein	Medtr4g065113.1_extensin-like_region_protein_LC_chr4:24482862-24481165_20140818
516.25	1.39931	8.15e-05	0.00331774	MSTRG.55654.4	1368	hypothetical protein MTR_5g010555	Medtr5g010555.1_hypothetical_protein_HC_chr5:2852736-2852280_20140818
2787.18	1.39837	2.01e-05	0.00115641	MSTRG.64982.7	864	non-symbiotic hemoglobin 1	Medtr4g068860.1_Non-symbiotic_hemoglobin_HC_chr4:25846162-25844617_20140818
94.6907	1.39827	0.000450741	0.0114908	MSTRG.77487.1	956	complex 1 LYR-like protein	Medtr6g068850.1_complex_1_LYR-like_protein_HC_chr6:24744886-24747929_20140818
88.0888	1.39693	0.00176829	0.0297604	MSTRG.58629.9	960	LRR receptor-like kinase family protein	Medtr2g099020.1_LRR_receptor-like_kinase_family_protein_LC_chr2:42413621-42412383_20140818
235.07	1.39595	2.02e-09	7.06e-07	119808_t	882	WRKY family transcription factor	Medtr3g106060.1_WRKY_family_transcription_factor_HC_chr3:48926808-48922741_20140818
237.325	1.39553	0.000212043	0.00667956	MSTRG.44631.1	268	---NA---	Medtr7g115220.1_Chitinase_/_Hevein_/_PR-4_/_Wheatwin2_HC_chr7:47582960-47584201_20140818
318.331	1.39519	0.000763	0.0166487	MSTRG.64323.3	925	ubiquitin family protein	Medtr1g012210.1_ubiquitin_family_protein_LC_chr1:2382883-2382131_20140818
76.74	1.39497	5.07e-05	0.00233497	63656_t	2163	adenylosuccinate lyase	Medtr7g092860.1_adenylosuccinate_lyase_HC_chr7:36850278-36855203_20140818
150.239	1.39438	1.94e-05	0.0011283	MSTRG.4028.4	669	P-loop nucleoside triphosphate hydrolase superfamily protein	Medtr4g032220.1_P-loop_nucleoside_triphosphate_hydrolase_superfamily_protein_HC_chr4:11075286-11080327_20140818
371.918	1.39385	2.17e-12	1.91e-09	80571_t	648	anaphase-promoting complex subunit 11 RING-H2 finger protein	Medtr2g090950.1_anaphase-promoting_complex_subunit_11_RING-H2_finger_protein_HC_chr2:39066658-39065308_20140818
111.093	1.39357	0.00139649	0.025286	MSTRG.37506.1	2784	disease resistance protein (TIR-NBS-LRR class)	Medtr6g069560.1_disease_resistance_protein_(TIR-NBS-LRR_class)_LC_chr6:25071428-25077838_20140818
172.175	1.39313	0.000469163	0.0118031	MSTRG.59040.3	1060	---NA---	Medtr3g462100.1_MEI2-like_protein,_putative_LC_chr3:24762802-24761878_20140818
125.984	1.39286	0.00210765	0.0334516	MSTRG.4168.2	252	---NA---	---NA---
235.297	1.39263	9.01e-05	0.00356996	MSTRG.46079.1	301	catalase 1b	Medtr3g115370.2_catalase_heme-binding_enzyme_HC_chr3:53951147-53954902_20140818
240.871	1.39242	7.42e-06	0.000534106	MSTRG.825.5	238	---NA---	---NA---
54.3637	1.3924	0.00223417	0.0348253	MSTRG.77107.1	740	---NA---	---NA---
105.518	1.39233	0.00111988	0.0217629	MSTRG.12867.3	1491	Ribonuclease H	Medtr2g450200.1_ABC_transporter_family_protein,_putative_LC_chr2:22144751-22142842_20140818
154.318	1.39218	2.43e-05	0.00133468	MSTRG.18770.10	1277	poly(ADP-ribose) polymerase domain protein	Medtr4g053530.1_poly(ADP-ribose)_polymerase_domain_protein_HC_chr4:19342499-19346920_20140818
503.87	1.39187	1.3e-06	0.000139137	MSTRG.14402.7	4406	anaphase-promoting complex subunit 1	Medtr5g082890.1_anaphase-promoting_complex_subunit_1_HC_chr5:35723483-35692350_20140818
152.871	1.39177	3.67e-05	0.0018482	MSTRG.18770.7	1217	poly(ADP-ribose) polymerase domain protein	Medtr4g053530.1_poly(ADP-ribose)_polymerase_domain_protein_HC_chr4:19342499-19346920_20140818
391.635	1.39008	8.81e-05	0.00351866	MSTRG.43380.7	1051	extensin-like region protein	Medtr4g065113.1_extensin-like_region_protein_LC_chr4:24482862-24481165_20140818
596.667	1.38988	8.03e-05	0.00328246	MSTRG.55654.1	2179	hypothetical protein MTR_5g010555	Medtr5g010555.1_hypothetical_protein_HC_chr5:2852736-2852280_20140818
774.023	1.38976	3.99e-05	0.00195892	MSTRG.78464.1	338	---NA---	---NA---
453.589	1.38965	6.59e-05	0.00284271	MSTRG.87739.1	1154	synaptobrevin-like protein	Medtr7g058640.1_synaptobrevin-like_protein_HC_chr7:21214758-21216356_20140818
60.2717	1.3892	0.00111848	0.0217412	MSTRG.38300.1	4002	superkiller-like protein	Medtr5g004660.1_superkiller-like_protein_HC_chr5:57937-73020_20140818
60.997	1.38848	5.88e-05	0.00261163	MSTRG.4977.2	516	nuclear pore complex protein NUP1-like	Medtr1g090340.1_hypothetical_protein_HC_chr1:40474954-40484117_20140818
402.62	1.38811	3.85e-13	4.36e-10	MSTRG.9198.3	1383	aldo/keto reductase family oxidoreductase	Medtr4g021410.1_aldo/keto_reductase_family_oxidoreductase_HC_chr4:6956705-6962668_20140818
40.3081	1.38775	0.000766626	0.0166969	MSTRG.66303.1	496	---NA---	---NA---
75.3828	1.38746	0.000584155	0.0137619	130827_t	582	E3 ubiquitin ligase	Medtr8g020850.1_E3_ubiquitin_ligase_HC_chr8:7360874-7355214_20140818
43.6609	1.38728	7.99e-05	0.00327109	45211_t	1668	E3 ubiquitin-protein ligase HERC2-like protein	Medtr3g109650.1_E3_ubiquitin-protein_ligase_HERC2-like_protein_HC_chr3:51296388-51292874_20140818
143.961	1.38628	0.000383508	0.0102579	187675_t	3051	protein FAR1-related sequence 5-like	Medtr7g446480.1_hypothetical_protein_LC_chr7:15845592-15844432_20140818
174.556	1.38594	0.000179732	0.00592561	MSTRG.21496.2	595	inhibitor of trypsin and hageman factor-like protein	Medtr1g075340.2_inhibitor_of_trypsin_and_hageman_factor-like_protein_HC_chr1:33356256-33356876_20140818
102.276	1.38575	3.42e-06	0.000294454	MSTRG.67389.5	828	peptidyl-prolyl cis-trans isomerase	Medtr5g039210.1_peptidyl-prolyl_cis-trans_isomerase_HC_chr5:17260281-17252233_20140818
42.1585	1.38565	0.000371299	0.0100143	MSTRG.41787.5	591	WAT1-related protein At1g09380-like	Medtr1g030400.1_nodulin_MtN21/EamA-like_transporter_family_protein_HC_chr1:10561241-10562801_20140818
116.637	1.38505	0.000278601	0.00811611	MSTRG.21288.7	351	---NA---	---NA---
99.9561	1.38496	3.73e-07	5.13e-05	MSTRG.67789.5	585	replication factor-A carboxy-terminal domain protein	Medtr1g075850.1_replication_factor-A_carboxy-terminal_domain_protein_LC_chr1:33615520-33612872_20140818
57.8163	1.38484	0.00018243	0.00599544	MSTRG.8304.3	294	---NA---	Medtr1g045210.1_transmembrane_protein,_putative_LC_chr1:17016341-17017348_20140818
77.1601	1.38468	3.25e-07	4.59e-05	6404_t	1068	ataxia telangiectasia mutated family protein	Medtr2g013980.1_telomerase_activating_protein_Est1_HC_chr2:3860890-3866296_20140818
61.6798	1.38449	0.00241904	0.0367991	MSTRG.70466.1	703	---NA---	---NA---
491.531	1.38448	6.62e-06	0.000487868	MSTRG.11497.3	299	---NA---	---NA---
49.0204	1.38282	0.000181519	0.0059731	MSTRG.25788.3	433	---NA---	---NA---
175.889	1.38261	0.000759254	0.0165856	MSTRG.89065.1	673	transmembrane protein, putative	Medtr3g015420.1_transmembrane_protein,_putative_HC_chr3:4461069-4459937_20140818
126.453	1.38247	1.09e-05	0.000723113	MSTRG.65869.4	1571	tRNA-splicing endonuclease subunit sen54 amino-terminal protein	Medtr8g090105.1_tRNA-splicing_endonuclease_subunit_sen54_amino-terminal_protein_HC_chr8:37741275-37738113_20140818
55.8627	1.38172	0.00113393	0.0219643	MSTRG.19608.2	443	transmembrane protein, putative	Medtr8g106520.2_transmembrane_protein,_putative_HC_chr8:44943202-44940421_20140818
72.3412	1.38063	8.26e-05	0.00334713	MSTRG.44572.2	241	---NA---	---NA---
55.4583	1.37966	0.000149533	0.00518023	MSTRG.6222.1	1120	---NA---	Medtr3g048970.1_transmembrane_protein,_putative_HC_chr3:18203855-18205353_20140818
89.6267	1.37923	0.000914348	0.0189525	MSTRG.46461.4	471	GDA1/CD39 nucleoside phosphatase family protein	Medtr5g040710.1_GDA1/CD39_nucleoside_phosphatase_family_protein_HC_chr5:17904122-17894581_20140818
104.872	1.37901	1.35e-06	0.000143188	MSTRG.7859.4	1018	ribosomal RNA-processing-like protein	Medtr7g033530.1_ribosomal_RNA-processing-like_protein_HC_chr7:12137758-12130937_20140818
68.6817	1.37891	0.000109507	0.00412794	30657_t	1527	Putative non-LTR retroelement reverse transcriptase, related	Medtr3g081050.1_hypothetical_protein_LC_chr3:36710284-36708952_20140818
285.432	1.37853	7.04e-05	0.00298311	27518_t	1191	cytochrome P450 84A1-like	Medtr8g076290.1_cytochrome_P450_family_monooxygenase_HC_chr8:32316653-32312590_20140818
203.237	1.37832	0.00252635	0.0378663	57636_t	468	pathogenesis-related thaumatin family protein	Medtr8g096910.1_pathogenesis-related_thaumatin_family_protein_HC_chr8:40676250-40675354_20140818
79.922	1.37796	0.00203187	0.0326504	MSTRG.72273.3	5924	LRR and NB-ARC domain disease resistance protein	Medtr8g079400.2_LRR_and_NB-ARC_domain_disease_resistance_protein_HC_chr8:33971377-33976618_20140818
50.9755	1.37733	0.000742025	0.0163279	MSTRG.2900.1	584	hypothetical protein MTR_7g064070	Medtr7g064070.1_hypothetical_protein_HC_chr7:23411910-23411315_20140818
440.343	1.37705	0.000361217	0.00982018	MSTRG.25378.3	692	K-like selenoprotein	Medtr5g059100.2_K-like_selenoprotein_HC_chr5:24388650-24393445_20140818
66.97	1.3769	5.18e-05	0.00237145	MSTRG.3143.2	2420	pentatricopeptide (PPR) repeat protein	Medtr1g018830.1_hypothetical_protein_HC_chr1:5545314-5542120_20140818
324.435	1.37665	6.26e-06	0.000466074	MSTRG.11497.4	244	---NA---	---NA---
109.022	1.37651	7.12e-05	0.00300738	59272_t	5046	disease resistance protein (TIR-NBS-LRR class)	Medtr4g021057.1_disease_resistance_protein_(TIR-NBS-LRR_class)_LC_chr4:6791029-6798592_20140818
424.561	1.37651	0.00326885	0.0450428	MSTRG.25378.4	831	K-like selenoprotein	Medtr5g059100.2_K-like_selenoprotein_HC_chr5:24388650-24393445_20140818
77.0663	1.37537	4.26e-05	0.00204837	MSTRG.22136.1	379	---NA---	---NA---
492.891	1.37437	0.000121734	0.00446523	MSTRG.25378.2	687	Selenoprotein K	Medtr5g059100.1_K-like_selenoprotein_HC_chr5:24388547-24393467_20140818
89.8705	1.3737	3.64e-05	0.00183399	MSTRG.17584.1	1822	vacuolar cation/proton exchanger 3	Medtr7g068380.1_vacuolar_cation/proton_exchanger_3_HC_chr7:25016522-25012334_20140818
341.903	1.37058	0.00099643	0.0200844	MSTRG.23767.1	2004	F-box/LRR protein, putative	Medtr6g016725.1_F-box/LRR_protein,_putative_LC_chr6:6417673-6415859_20140818
181.78	1.37002	6.7e-05	0.00287572	MSTRG.4870.10	294	glutathione S-transferase, amino-terminal domain protein	Medtr7g065260.1_glutathione_S-transferase_HC_chr7:23798295-23796391_20140818
36.5636	1.37001	7.84e-05	0.00322051	MSTRG.35027.2	219	serine/threonine-protein kinase HT1	Medtr6g004440.1_Serine/Threonine-kinase_HT1-like_protein_HC_chr6:281467-284751_20140818
343.063	1.36965	4.22e-05	0.00203752	MSTRG.43198.4	1032	hypothetical protein MTR_3g019260	Medtr3g019260.1_hypothetical_protein_LC_chr3:5382774-5383276_20140818
107.426	1.36957	0.000259205	0.00771501	MSTRG.12641.3	699	---NA---	---NA---
542.898	1.3685	6.21e-08	1.19e-05	MSTRG.72239.2	1237	---NA---	---NA---
75.8702	1.36846	1.67e-06	0.000168883	MSTRG.83923.3	1364	TMV resistance protein N-like	Medtr7g090730.1_hypothetical_protein_LC_chr7:35725867-35723628_20140818
188.136	1.36764	0.000424191	0.0110189	MSTRG.48135.1	3648	protein FAR1-related sequence 5-like	Medtr7g446480.1_hypothetical_protein_LC_chr7:15845592-15844432_20140818
37.5953	1.36693	0.00151826	0.0267926	MSTRG.24785.6	877	---NA---	---NA---
38.3602	1.36613	0.00235824	0.0361332	MSTRG.16243.1	261	---NA---	---NA---
174.48	1.3655	0.00114915	0.0221566	MSTRG.59040.2	1181	MEI2-like protein, putative	Medtr3g462100.1_MEI2-like_protein,_putative_LC_chr3:24762802-24761878_20140818
137.217	1.36508	0.000342881	0.0094553	MSTRG.41854.3	547	---NA---	---NA---
53.4612	1.36359	0.0020887	0.0332463	MSTRG.18147.1	765	probable WRKY transcription factor 71	Medtr5g091390.1_WRKY_family_transcription_factor_HC_chr5:39836382-39833708_20140818
90.6331	1.36345	0.000417343	0.0109064	MSTRG.46461.3	334	GDA1/CD39 nucleoside phosphatase family protein	Medtr5g040710.1_GDA1/CD39_nucleoside_phosphatase_family_protein_HC_chr5:17904122-17894581_20140818
87.4637	1.36319	0.000177399	0.0058712	112685_t	3465	disease resistance protein (TIR-NBS-LRR class)	Medtr6g069560.1_disease_resistance_protein_(TIR-NBS-LRR_class)_LC_chr6:25071428-25077838_20140818
100.801	1.36243	0.000112965	0.00422112	MSTRG.42041.3	737	flocculation protein FLO11	Medtr7g073720.1_hypothetical_protein_HC_chr7:27594597-27590526_20140818
84.4983	1.3618	0.000469033	0.0118031	MSTRG.17104.2	1428	F-box-like protein	Medtr1g025830.1_F-box-like_protein_LC_chr1:8301266-8300592_20140818
106.251	1.36164	0.000537497	0.0129583	MSTRG.2498.3	1556	Ribonuclease H	Medtr8g470880.1_endonuclease/exonuclease/phosphatase_family_protein_LC_chr8:25755817-25753177_20140818
262.949	1.36151	0.000338772	0.00937199	MSTRG.66621.2	1033	FDB-associated F-box protein	Medtr3g019060.1_hypothetical_protein_HC_chr3:5308654-5310320_20140818
492.911	1.36049	0.000214631	0.0067348	12467_t	3216	TRAF superfamily protein, putative	Medtr8g089030.2_TRAF_superfamily_protein,_putative_LC_chr8:37006804-36995677_20140818
43.8178	1.36014	0.000766996	0.0167006	174329_t	675	ribosomal RNA-processing-like protein	Medtr7g033530.1_ribosomal_RNA-processing-like_protein_HC_chr7:12137758-12130937_20140818
49.1614	1.36	0.00107315	0.0211224	30921_t	903	indigoidine synthase A-like protein	Medtr4g031220.1_indigoidine_synthase_A-like_protein_HC_chr4:10794808-10791869_20140818
102.182	1.35997	0.00192438	0.0314548	MSTRG.70402.1	5457	frigida-LIKE protein	Medtr2g091260.1_frigida-LIKE_protein_LC_chr2:39400462-39395750_20140818
103.065	1.35937	0.000194542	0.00628024	MSTRG.52933.7	2162	poly(ADP-ribose) polymerase domain protein	Medtr4g053530.1_poly(ADP-ribose)_polymerase_domain_protein_HC_chr4:19342499-19346920_20140818
55.4595	1.35879	0.00184243	0.0305636	MSTRG.36204.2	1021	ribonuclease H	Medtr4g071360.1_hypothetical_protein_LC_chr4:26938150-26938656_20140818
366.648	1.35856	8.35e-06	0.000584802	MSTRG.11497.2	248	---NA---	---NA---
374.666	1.35827	3.81e-08	7.86e-06	MSTRG.67241.1	1266	2OG-Fe(II) oxygenase family oxidoreductase	Medtr8g041600.1_2OG-Fe(II)_oxygenase_family_oxidoreductase_HC_chr8:15682611-15680295_20140818
88.1613	1.35697	0.00213101	0.0337222	MSTRG.58895.14	766	hydroproline-rich protein	hydroproline-rich protein
31569	1.3556	4.06e-10	1.78e-07	MSTRG.40428.1	654	dormancy-associated protein homolog 3 isoform X1	Medtr7g112860.1_dormancy/auxin_associated_protein_HC_chr7:46440002-46442445_20140818
84.5281	1.35498	0.000141432	0.00497525	MSTRG.85715.2	633	---NA---	Medtr3g010860.1_hypothetical_protein_HC_chr3:2629824-2625609_20140818
100.516	1.35437	0.00221067	0.0345792	69747_t	5364	frigida-LIKE protein	Medtr2g091260.1_frigida-LIKE_protein_LC_chr2:39400462-39395750_20140818
52.0252	1.35425	0.000106722	0.00405037	57777_t	1417	zinc protease PQQL-like	Medtr8g101950.1_peptidase_M16_inactive_domain_protein_HC_chr8:42848743-42859442_20140818
88.6282	1.35379	0.00119565	0.0227731	MSTRG.72273.2	1954	LRR and NB-ARC domain disease resistance protein	Medtr8g079400.2_LRR_and_NB-ARC_domain_disease_resistance_protein_HC_chr8:33971377-33976618_20140818
148.664	1.35375	0.000229487	0.00706529	MSTRG.41854.1	543	---NA---	---NA---
279.978	1.35314	2.26e-07	3.43e-05	MSTRG.70902.4	1221	bidirectional sugar transporter SWEET2-like	Medtr2g073190.1_sodium_bile_acid_symporter_family_protein_LC_chr2:30991272-30983345_20140818
636.085	1.35258	1.72e-05	0.00103786	MSTRG.61766.1	1380	transmembrane protein, putative	Medtr8g066860.1_transmembrane_protein,_putative_LC_chr8:27838280-27839611_20140818
173.883	1.35158	7.16e-05	0.00301919	MSTRG.85108.3	3494	telomere-associated protein RIF1-like isoform X2	Medtr3g086220.1_hypothetical_protein_HC_chr3:39010613-39016559_20140818
183.145	1.3515	0.000484894	0.0120792	MSTRG.66728.2	325	---NA---	---NA---
210.764	1.35122	0.00253618	0.0379723	MSTRG.84581.1	1479	---NA---	---NA---
229.746	1.3509	0.00248675	0.0374431	MSTRG.24148.1	1553	mitochondrial thiamine pyrophosphate carrier-like	Medtr2g436930.1_substrate_carrier_family_protein_HC_chr2:14442534-14448484_20140818
525.927	1.35058	0.000102352	0.00392976	MSTRG.25378.1	744	selenoprotein K	Medtr5g059100.1_K-like_selenoprotein_HC_chr5:24388547-24393467_20140818
239.831	1.35003	6.23e-05	0.00272683	MSTRG.41913.4	568	---NA---	---NA---
76.934	1.34957	0.00229125	0.0354399	MSTRG.65662.10	948	UPF0183 plant-like protein	Medtr5g021520.1_UPF0183_plant-like_protein_HC_chr5:8324036-8329804_20140818
75.2554	1.34937	0.000557037	0.0133072	57300_t	1056	seven in absentia family protein	Medtr5g076520.1_seven_in_absentia_family_protein_LC_chr5:32657346-32655547_20140818
58.7409	1.34862	0.00176316	0.0297034	MSTRG.74792.1	671	---NA---	---NA---
41.3072	1.34855	0.00314844	0.0439355	MSTRG.32572.4	943	ribonuclease H2 subunit C	ribonuclease H2 subunit C
114.806	1.34812	0.000103669	0.00396753	MSTRG.72118.19	1574	glycosyltransferase family 90 protein	Medtr8g031470.1_glycosyltransferase_family_90_protein_HC_chr8:11807748-11811706_20140818
138.588	1.34811	0.00155743	0.0272694	MSTRG.15012.1	722	1-aminocyclopropane-1-carboxylate oxidase 1-like	Medtr5g082750.1_leucoanthocyanidin_dioxygenase-like_protein_HC_chr5:35617880-35612464_20140818
341.478	1.34768	0.000112748	0.00421552	MSTRG.9008.1	284	---NA---	---NA---
132.942	1.34582	0.00108628	0.0213126	77830_t	6846	disease resistance protein (TIR-NBS-LRR class)	Medtr6g079090.1_disease_resistance_protein_(TIR-NBS-LRR_class)_LC_chr6:29761538-29752605_20140818
193.854	1.34518	0.000225222	0.00697417	MSTRG.79113.7	1822	E3 ubiquitin protein ligase RIN2-like	Medtr3g007760.1_E3_ubiquitin_protein_ligase_RIN2_HC_chr3:1166460-1173444_20140818
928.807	1.34395	3.9e-10	1.73e-07	MSTRG.30495.1	694	plant/F18B13-26 protein	Medtr4g011060.1_plant/F18B13-26_protein_HC_chr4:2600967-2600575_20140818
54.0595	1.34395	0.00207474	0.0330989	MSTRG.36815.1	402	germin family protein	Medtr4g017050.1_germin_family_protein_HC_chr4:5287228-5286312_20140818
175.959	1.34363	1.85e-05	0.00108922	MSTRG.29465.1	4856	disease resistance protein (TIR-NBS-LRR class)	Medtr3g058880.2_disease_resistance_protein_(TIR-NBS-LRR_class)_HC_chr3:23501701-23490353_20140818
84.325	1.34337	0.00318421	0.0442782	MSTRG.18669.6	1155	cyclin-like protein	Medtr2g098850.2_cyclin-like_protein_HC_chr2:42329066-42318796_20140818
160.791	1.34325	3.75e-05	0.00187177	MSTRG.75979.1	306	hypothetical protein MTR_3g026785	Medtr3g026785.1_hypothetical_protein_HC_chr3:8251194-8250863_20140818
67.4615	1.34259	0.000854695	0.0180544	139053_t	567	60S ribosomal protein L22-2	Medtr1g088450.1_ribosomal_L22e_family_protein_HC_chr1:39552080-39550264_20140818
189.094	1.34255	2.23e-06	0.000212022	MSTRG.46761.2	4445	disease resistance protein (TIR-NBS-LRR class)	Medtr6g488300.1_disease_resistance_protein_(TIR-NBS-LRR_class)_LC_chr6:33265990-33259390_20140818
40.9117	1.34233	0.00235547	0.0360979	MSTRG.67108.2	1182	chromosome-associated kinesin KIF4-like protein, putative	Medtr3g100230.1_chromosome-associated_kinesin_KIF4-like_protein,_putative_HC_chr3:46066367-46057487_20140818
46.5143	1.34096	0.00236481	0.0362088	MSTRG.69668.1	332	heavy metal transport/detoxification superfamily protein	Medtr1g099810.1_heavy_metal_transport/detoxification_superfamily_protein_HC_chr1:45042205-45040793_20140818
66.1746	1.34067	0.000121385	0.00445621	61192_t	771	protein YLS7	Medtr6g061710.1_trichome_birefringence-like_protein_HC_chr6:23942619-23938443_20140818
68.0731	1.34058	2.38e-05	0.00131954	MSTRG.68629.1	315	---NA---	---NA---
165.159	1.34053	0.00361478	0.0481562	MSTRG.75251.4	730	calcium-dependent protein kinase 17-like	Medtr1g054865.1_calmodulin-domain_kinase_CDPK_protein_HC_chr1:24041840-24046332_20140818
48.9295	1.34016	0.00328821	0.0452211	MSTRG.49278.2	883	senescence-associated protein	Medtr0055s0030.1_hypothetical_protein_HC_scaffold0055:6527-3946_20140818
79.6073	1.34003	0.000684023	0.0154363	MSTRG.79817.1	316	---NA---	---NA---
37.4693	1.33933	0.000128483	0.0046401	39943_t	393	serine/threonine-protein kinase HT1	Medtr6g004440.1_Serine/Threonine-kinase_HT1-like_protein_HC_chr6:281467-284751_20140818
352.011	1.33925	0.000529554	0.0128207	MSTRG.61766.3	557	transmembrane protein, putative	Medtr8g066860.1_transmembrane_protein,_putative_LC_chr8:27838280-27839611_20140818
188.409	1.33863	0.000109512	0.00412794	MSTRG.22297.1	4381	1-phosphatidylinositol phosphodiesterase-like protein	Medtr1g060090.1_1-phosphatidylinositol_phosphodiesterase-like_protein_HC_chr1:26168868-26169821_20140818
193.822	1.33836	3.05e-09	9.98e-07	MSTRG.49442.4	1000	mediator of RNA polymerase II transcription subunit 18	Medtr2g438770.1_mediator_of_RNA_polymerase_II_transcription_subunit_18_HC_chr2:15688067-15683753_20140818
62.6547	1.33794	0.000109063	0.00411703	139504_t	4518	disease resistance protein (CC-NBS-LRR class) family protein	Medtr1g051585.1_disease_resistance_protein_(CC-NBS-LRR_class)_family_protein_HC_chr1:20473972-20489733_20140818
41.4924	1.33721	0.000359077	0.00977489	6845_t	1581	wall-associated receptor kinase-like 2	Medtr7g079350.1_LysM_type_receptor_kinase_HC_chr7:30114251-30117480_20140818
236.215	1.33691	0.000622779	0.0144154	MSTRG.86600.3	495	G-type lectin S-receptor-like serine/threonine-kinase	Medtr7g056620.1_S-locus_lectin_kinase_family_protein_HC_chr7:20231729-20232384_20140818
137.366	1.3366	0.00285734	0.0412117	MSTRG.79106.1	915	vacuolar protein sorting-associated protein 32 homolog 2-like	Medtr6g090515.1_charged_multivesicular_body_protein_HC_chr6:34403252-34407494_20140818
182.8	1.33645	0.000216203	0.00676933	85719_t	1956	60S ribosomal protein L3	Medtr1g098540.1_60S_ribosomal_protein_L3B_HC_chr1:44369848-44366402_20140818
5259.72	1.33642	1.01e-09	3.92e-07	MSTRG.22616.3	831	RNA-binding (RRM/RBD/RNP motif) family protein	Medtr4g070140.1_RNA-binding_(RRM/RBD/RNP_motif)_family_protein_LC_chr4:26401562-26402849_20140818
705.726	1.33628	7.03e-07	8.55e-05	MSTRG.62560.1	459	---NA---	---NA---
231.243	1.33624	0.000137505	0.00487137	MSTRG.35438.6	639	GEM-like protein 4	Medtr1g114640.1_GRAM_domain_protein/ABA-responsive-like_protein_HC_chr1:51754431-51753109_20140818
75.5609	1.33619	0.000574631	0.0136103	MSTRG.87690.1	588	hypothetical protein MTR_4g060620	Medtr4g060620.1_hypothetical_protein_HC_chr4:22312656-22311664_20140818
930.677	1.33587	2.32e-10	1.15e-07	MSTRG.37201.1	439	octicosapeptide/phox/Bem1p family protein	Medtr1g109470.1_octicosapeptide/phox/Bem1p_family_protein_HC_chr1:49509995-49513014_20140818
307.816	1.33586	1.69e-06	0.000170106	MSTRG.18836.3	1277	disease resistance protein (TIR-NBS-LRR class)	Medtr6g078630.1_disease_resistance_protein_(TIR-NBS-LRR_class)_HC_chr6:29530050-29528847_20140818
126.984	1.33562	2.03e-05	0.00116628	MSTRG.17199.32	2019	disease resistance protein (TIR-NBS-LRR class)	Medtr6g472300.1_disease_resistance_protein_(TIR-NBS-LRR_class)_LC_chr6:26075767-26079593_20140818
198.667	1.33481	0.000591951	0.0139012	MSTRG.41942.2	2151	C-terminal binding protein AN	Medtr7g078990.1_carboxy-terminal-binding_protein_AN_HC_chr7:29912264-29905927_20140818
1042.76	1.33467	0.000121371	0.00445621	MSTRG.6905.1	638	potato type II proteinase inhibitor family protein	Medtr4g032865.1_potato_type_II_proteinase_inhibitor_family_protein_HC_chr4:11363448-11362693_20140818
262.366	1.33445	4.88e-06	0.000386156	MSTRG.77563.28	4864	LRR and NB-ARC domain disease resistance protein	Medtr0425s0020.1_LRR_and_NB-ARC_domain_disease_resistance_protein_LC_scaffold0425:6387-10157_20140818
170.791	1.33443	5.15e-05	0.00236094	MSTRG.75154.2	2045	casein kinase I-like isoform X1	Medtr1g004990.1_casein_kinase_HC_chr1:35910-40554_20140818
323.629	1.33431	0.000277237	0.00808512	MSTRG.88367.3	4882	modifier OF SNC1 1, putative	Medtr3g077440.1_modifier_OF_SNC1_1,_putative_HC_chr3:34767661-34777932_20140818
287.183	1.33395	5.4e-05	0.00244881	MSTRG.53328.1	213	transmembrane protein, putative	Medtr7g089270.1_hypothetical_protein_LC_chr7:34912936-34914015_20140818
1054.9	1.33364	1.62e-07	2.61e-05	MSTRG.70674.2	798	late embryogenesis abundant protein Lea5	Medtr4g120040.1_late_embryogenesis_abundant_protein_HC_chr4:49759382-49760884_20140818
104.564	1.3336	4.55e-05	0.00215571	MSTRG.15016.3	591	cinnamyl alcohol dehydrogenase	Medtr8g062440.1_cinnamyl_alcohol_dehydrogenase_HC_chr8:26099624-26105442_20140818
152.269	1.3336	0.000727367	0.0161094	MSTRG.61114.6	532	stem-specific protein TSJT1-like	Medtr4g117050.1_aluminum_induced_protein_with_YGL_and_LRDR_motif_protein_HC_chr4:48494729-48490975_20140818
158.596	1.33349	2.45e-06	0.000227421	MSTRG.29465.5	2926	disease resistance protein (TIR-NBS-LRR class)	Medtr3g058880.2_disease_resistance_protein_(TIR-NBS-LRR_class)_HC_chr3:23501701-23490353_20140818
56.0485	1.33343	0.00295963	0.0421387	MSTRG.57618.1	700	---NA---	Medtr0034s0060.1_rhamnose_biosynthetic-like_enzyme_HC_scaffold0034:17359-21865_20140818
162.594	1.33313	0.000523751	0.0127399	MSTRG.20538.1	1126	hypothetical protein MTR_5g086360	Medtr5g086360.1_hypothetical_protein_HC_chr5:37328062-37328358_20140818
143.669	1.33304	0.000374461	0.0100803	MSTRG.84626.3	436	Immediate early response 3-interacting protein 1	Medtr4g019160.1_Yos1-like_protein_HC_chr4:5956061-5952088_20140818
41.8972	1.33238	0.00248919	0.0374653	MSTRG.67534.14	1240	nucleoporin autopeptidase	Medtr1g078040.2_nucleoporin_autopeptidase_HC_chr1:34898558-34890792_20140818
105.893	1.33208	5.28e-05	0.00240923	MSTRG.38278.1	2001	SWIB/MDM2 domain protein	Medtr5g005200.1_SWIB/MDM2_domain_protein_HC_chr5:242485-244145_20140818
2710.01	1.3319	6.51e-07	8.03e-05	MSTRG.20099.7	929	disease-resistance response protein	Medtr2g035100.2_disease-resistance_response_protein_chr2:13483915-13486217_20140818
92.3594	1.33164	0.000230921	0.00709699	MSTRG.54032.1	764	hypothetical protein MTR_7g017460	Medtr7g017460.1_hypothetical_protein_LC_chr7:5568810-5568104_20140818
53.1791	1.33155	0.00113201	0.0219392	MSTRG.66342.3	565	---NA---	---NA---
46.327	1.33127	0.00181558	0.0302836	MSTRG.75126.2	768	---NA---	---NA---
21076.1	1.33114	4.69e-09	1.43e-06	MSTRG.21065.1	2362	abscisic acid receptor PYL4	Medtr4g014460.1_abscisic_acid_receptor_HC_chr4:4083299-4081745_20140818
1175.69	1.33106	2.97e-05	0.00157267	MSTRG.21483.4	822	PB1 domain protein	Medtr5g032960.1_PB1_domain_protein_HC_chr5:14201643-14199883_20140818
212.436	1.33096	3.31e-11	2.09e-08	MSTRG.44166.3	1174	PHD finger protein ING2	Medtr7g085450.1_PHD_finger-like_protein_HC_chr7:33106030-33108687_20140818
129.627	1.33042	0.00147377	0.0262407	157367_t	738	peroxidase family protein	Medtr2g029910.1_peroxidase_family_protein_HC_chr2:11192617-11190342_20140818
178.753	1.32985	6.65e-09	1.93e-06	MSTRG.49442.3	1000	mediator of RNA polymerase II transcription subunit 18	Medtr2g438770.1_mediator_of_RNA_polymerase_II_transcription_subunit_18_HC_chr2:15688067-15683753_20140818
68.5461	1.32985	0.000115424	0.00428831	MSTRG.33457.3	961	transmembrane protein, putative	Medtr6g072515.1_hypothetical_protein_HC_chr6:26852904-26853960_20140818
38.9827	1.32916	0.00342459	0.0464582	MSTRG.679.6	520	core-2/I-branching enzyme	Medtr2g024120.1_core-2/I-branching_enzyme_HC_chr2:8588201-8581477_20140818
62.7459	1.32912	0.000796402	0.017129	MSTRG.33776.6	557	probable lactoylglutathione lyase, chloroplastic	Medtr8g102980.1_lactoylglutathione_lyase-like_protein_HC_chr8:43369719-43364878_20140818
188.494	1.32907	2.14e-05	0.00121384	MSTRG.74514.1	496	late embryogenesis abundant protein	Medtr6g471090.1_late_embryogenesis_abundant_protein_HC_chr6:25442200-25443023_20140818
1942.92	1.32859	0.000985181	0.0199485	MSTRG.86655.5	4204	TRAF superfamily protein, putative	Medtr8g089030.1_TRAF_superfamily_protein,_putative_LC_chr8:37006804-36991603_20140818
50.358	1.32767	0.00206356	0.0329746	155318_t	4371	disease resistance protein (TIR-NBS-LRR class)	Medtr6g079140.1_disease_resistance_protein_(TIR-NBS-LRR_class)_HC_chr6:29804255-29799693_20140818
84.6719	1.32647	0.00138521	0.0251467	188488_t	1854	zinc finger BED domain-containing protein RICESLEEPER 2-like	Medtr5g034530.1_hypothetical_protein_LC_chr5:14993712-14993306_20140818
180.596	1.32616	0.000647821	0.0148332	MSTRG.53165.4	942	topless-like protein	Medtr7g007420.1_hypothetical_protein_LC_chr7:1478287-1479232_20140818
108.392	1.3259	0.000814746	0.0173917	MSTRG.63577.5	960	disease resistance protein (CC-NBS-LRR class) family protein	Medtr3g053200.1_disease_resistance_protein_(CC-NBS-LRR_class)_family_protein_HC_chr3:21121992-21126814_20140818
61.4994	1.32519	0.000318516	0.00896695	MSTRG.51254.2	1588	cysteine-rich receptor-kinase-like protein	Medtr1g105655.1_cysteine-rich_receptor-kinase-like_protein_HC_chr1:47638290-47641699_20140818
152.371	1.32481	3.53e-07	4.91e-05	MSTRG.12899.1	1192	vacuolar protein sorting-associated protein 22 homolog 1	Medtr3g051210.1_vacuolar_sorting_protein_SNF8_HC_chr3:20205015-20212262_20140818
189.149	1.32468	6.29e-09	1.84e-06	MSTRG.49442.2	1050	mediator of RNA polymerase II transcription subunit 18	Medtr2g438770.1_mediator_of_RNA_polymerase_II_transcription_subunit_18_HC_chr2:15688067-15683753_20140818
42.766	1.32402	0.00246511	0.0372556	MSTRG.37904.5	903	high mobility group (HMG)-box protein	Medtr1g115220.1_high_mobility_group_(HMG)-box_protein_HC_chr1:51907197-51909052_20140818
1314.66	1.32374	0.00168634	0.0288312	MSTRG.2731.3	307	---NA---	---NA---
1394.29	1.32283	7.19e-07	8.73e-05	MSTRG.57218.1	299	probable aquaporin TIP-type	Medtr7g103030.1_tonoplast_intrinsic_protein_HC_chr7:41419534-41417358_20140818
128.397	1.32189	0.000161141	0.00548908	MSTRG.53269.2	632	RALF-like protein	Medtr8g010200.1_RALF-like_protein_HC_chr8:2610443-2609370_20140818
118.751	1.32099	0.000939059	0.0193193	MSTRG.25901.2	298	---NA---	---NA---
52.8822	1.32053	0.000265385	0.00785019	MSTRG.80108.6	2050	lariat debranching enzyme	Medtr3g105810.1_lariat_debranching_enzyme_HC_chr3:48808334-48804213_20140818
112.761	1.31976	4.1e-07	5.54e-05	MSTRG.39409.2	335	myelodysplasia-myeloid leukemia factor 1-interacting protein	Medtr4g102250.1_myelodysplasia-myeloid_leukemia_factor_1-interacting_protein_HC_chr4:42300094-42304057_20140818
161.064	1.31973	0.00034483	0.00949215	MSTRG.53235.3	676	---NA---	---NA---
130.028	1.31938	0.000111448	0.00418767	MSTRG.24148.3	1083	substrate carrier family protein	Medtr2g436930.2_substrate_carrier_family_protein_HC_chr2:14442618-14448152_20140818
1898.77	1.31926	0.0010179	0.0203688	MSTRG.86655.6	4214	TRAF superfamily protein, putative	Medtr8g089030.1_TRAF_superfamily_protein,_putative_LC_chr8:37006804-36991603_20140818
47.8331	1.31916	0.000791275	0.0170723	MSTRG.3892.1	877	iron-sulfur cluster assembly protein IscA	Medtr5g063650.1_pumilio-family_RNA-binding_repeatprotein_LC_chr5:26380049-26384328_20140818
1401.54	1.31869	0.00101904	0.0203889	MSTRG.86655.1	4226	TRAF superfamily protein, putative	Medtr8g089030.1_TRAF_superfamily_protein,_putative_LC_chr8:37006804-36991603_20140818
162.076	1.31804	0.00088993	0.0185908	MSTRG.73999.3	387	hypothetical protein MTR_5g043280	Medtr5g043280.1_hypothetical_protein_HC_chr5:19027903-19029338_20140818
130.598	1.31784	0.000172013	0.0057519	MSTRG.73872.1	344	cytochrome P450 family 71 protein	Medtr4g048580.1_cytochrome_P450_family_71_protein_HC_chr4:17250064-17248200_20140818
120.281	1.31737	0.000374991	0.0100911	MSTRG.17199.33	1186	UPF0614 protein/C14orf102-like protein	Medtr6g472250.1_hypothetical_protein_HC_chr6:26062743-26064085_20140818
298.845	1.31728	9.67e-07	0.000110213	MSTRG.70902.2	1199	sodium bile acid symporter family protein	Medtr2g073190.1_sodium_bile_acid_symporter_family_protein_LC_chr2:30991272-30983345_20140818
295.69	1.317	0.000229309	0.00706262	MSTRG.86498.1	628	vacuolar ATP synthase catalytic subunit	Medtr5g019820.1_hypothetical_protein_LC_chr5:7525320-7524963_20140818
145.717	1.31524	0.000102747	0.00394003	MSTRG.14526.1	2055	60S ribosomal export protein nmd3-like	Medtr4g107030.1_nonsense-mediated_mRNA_decay_NMD3_family_protein_HC_chr4:43995360-43996798_20140818
992.043	1.31473	1e-07	1.78e-05	MSTRG.83153.3	1283	myb transcription factor	Medtr4g063100.2_myb_transcription_factor_HC_chr4:23345830-23343942_20140818
39.9557	1.31468	0.000924156	0.0191075	MSTRG.36388.8	1103	replication factor-A carboxy-terminal domain protein	Medtr5g093790.1_hypothetical_protein_HC_chr5:40946221-40950568_20140818
150.887	1.31418	0.000312349	0.00883347	MSTRG.83941.8	1937	ubiquitin-activating enzyme E1 1	Medtr5g072480.1_ubiquitin-activating_enzyme_E1_1_HC_chr5:30842736-30830993_20140818
84.3746	1.31386	0.00224183	0.0348913	MSTRG.2498.1	1464	Ribonuclease H	Medtr8g470880.1_endonuclease/exonuclease/phosphatase_family_protein_LC_chr8:25755817-25753177_20140818
642.774	1.31353	6.45e-05	0.00280425	MSTRG.55654.3	1960	hypothetical protein MTR_5g010555	Medtr5g010555.1_hypothetical_protein_HC_chr5:2852736-2852280_20140818
106.266	1.31292	0.000158438	0.00541367	MSTRG.67654.2	932	---NA---	---NA---
63.5452	1.31215	0.00151274	0.0267438	MSTRG.35490.1	774	---NA---	---NA---
60.9508	1.31155	0.0010123	0.020296	165862_t	657	LURP-one-like protein	Medtr7g072270.1_LURP-one-like_protein_HC_chr7:26835816-26838300_20140818
241.456	1.31144	0.000289684	0.00836192	MSTRG.21717.1	5398	disease resistance protein (TIR-NBS-LRR class)	Medtr5g090940.1_disease_resistance_protein_(TIR-NBS-LRR_class)_HC_chr5:39619088-39625198_20140818
182.455	1.31069	0.000325694	0.00909631	MSTRG.50921.2	256	---NA---	---NA---
70.2806	1.31035	0.000723054	0.0160414	MSTRG.22820.1	308	---NA---	---NA---
60.2983	1.31026	0.00145304	0.0259879	MSTRG.81954.1	1579	hypothetical protein MtrDRAFT_AC155885g3v2	Medtr7g092090.1_hypothetical_protein_HC_chr7:36463998-36463196_20140818
44.1518	1.30999	0.00372082	0.0490684	MSTRG.18406.2	1530	inactive poly [ADP-ribose] polymerase SRO4	Medtr3g077870.1_inactive_poly_[ADP-ribose]_polymerase_SRO4_HC_chr3:35056982-35060567_20140818
85.7157	1.30984	0.000584348	0.0137644	MSTRG.8591.1	200	polygalacturonase inhibitor protein	Medtr7g023630.1_polygalacturonase_inhibitor_protein_LC_chr7:7714204-7713226_20140818
174.005	1.30938	1.92e-05	0.0011207	MSTRG.46761.3	3558	disease resistance protein (TIR-NBS-LRR class)	Medtr6g488300.1_disease_resistance_protein_(TIR-NBS-LRR_class)_LC_chr6:33265990-33259390_20140818
677.628	1.30933	2.31e-06	0.000217829	MSTRG.32639.4	318	50S ribosomal protein l4-like	Medtr5g089380.1_hypothetical_protein_LC_chr5:38848771-38849072_20140818
6856.87	1.30865	3.69e-05	0.00185317	186367_t	528	putative mitochondrial protein	Medtr3g435560.1_hypothetical_protein_LC_chr3:11677430-11678921_20140818
69.1234	1.30829	4.01e-05	0.00196543	144509_t	360	ribosomal RNA-processing protein	Medtr8g085800.1_ribosomal_RNA-processing_protein_HC_chr8:35574333-35569420_20140818
157.536	1.30801	0.000448335	0.0114483	56877_t	1854	C-terminal binding protein AN	Medtr7g078990.1_carboxy-terminal-binding_protein_AN_HC_chr7:29912264-29905927_20140818
227.497	1.3068	0.000738357	0.0162783	MSTRG.56608.5	796	---NA---	---NA---
281.091	1.30621	1.88e-06	0.000186268	MSTRG.77563.26	4698	LRR and NB-ARC domain disease resistance protein	Medtr0425s0020.1_LRR_and_NB-ARC_domain_disease_resistance_protein_LC_scaffold0425:6387-10157_20140818
50.7662	1.30583	0.00292645	0.0418278	MSTRG.64371.11	681	F-box/FBD/LRR-repeat protein	Medtr5g038430.1_F-box/FBD-like_domain_protein_HC_chr5:16855539-16866753_20140818
156.851	1.30424	0.000352777	0.00965087	MSTRG.23684.4	4504	disease resistance protein (TIR-NBS-LRR class)	Medtr8g032830.1_disease_resistance_protein_(TIR-NBS-LRR_class),_putative_LC_chr8:12588216-12593933_20140818
82.4025	1.30343	4e-05	0.00196267	MSTRG.51533.5	292	hypothetical protein MTR_1g052680	Medtr1g052680.1_hypothetical_protein_HC_chr1:21619248-21620689_20140818
188.583	1.3034	7.11e-06	0.000516009	MSTRG.25253.3	806	glucose-induced degradation protein 4 homolog	Medtr4g020460.1_glucose-induced_degradation-like_protein,_putative_HC_chr4:6480316-6475433_20140818
134.344	1.30276	8.39e-05	0.00338857	MSTRG.15240.1	1770	---NA---	Medtr1g085600.1_hypothetical_protein_HC_chr1:38240615-38237478_20140818
47.726	1.30225	0.000665978	0.0151327	MSTRG.55039.3	512	---NA---	Medtr8g032210.1_hypothetical_protein_HC_chr8:12103555-12102414_20140818
102.523	1.30123	3.35e-06	0.000289818	MSTRG.85233.1	1099	---NA---	---NA---
148.921	1.30103	1.47e-05	0.000917076	192928_t	4209	disease resistance protein (TIR-NBS-LRR class)	Medtr6g488300.1_disease_resistance_protein_(TIR-NBS-LRR_class)_LC_chr6:33265990-33259390_20140818
206.205	1.30015	2.03e-10	1.03e-07	MSTRG.44166.2	1142	PHD finger protein ING2	Medtr7g085450.1_PHD_finger-like_protein_HC_chr7:33106030-33108687_20140818
193.633	1.29971	0.000749399	0.0164562	73033_t	600	synaptobrevin-like protein	Medtr7g058640.1_synaptobrevin-like_protein_HC_chr7:21214758-21216356_20140818
61.3878	1.29783	0.00124698	0.0233709	MSTRG.73502.1	436	ABC-2 and plant PDR ABC-type transporter family protein	Medtr1g011650.1_ABC-2_and_plant_PDR_ABC-type_transporter_family_protein_HC_chr1:2167106-2157509_20140818
93.7354	1.29752	0.000186314	0.00609075	120269_t	411	cysteine-rich TM module stress tolerance protein	Medtr2g069420.1_cysteine-rich_TM_module_stress_tolerance_protein_HC_chr2:28863285-28862334_20140818
125.471	1.29644	8.34e-05	0.00337199	MSTRG.75154.3	1921	casein kinase I-like isoform X1	Medtr1g004990.1_casein_kinase_HC_chr1:35910-40554_20140818
77.8165	1.29631	0.00037536	0.0100993	MSTRG.23123.1	2712	DNA repair helicase XPB1	Medtr8g098675.1_DNA_repair_helicase_XPB1_HC_chr8:41191751-41200265_20140818
160.268	1.29535	0.000251534	0.00754029	MSTRG.23684.1	4430	disease resistance protein (TIR-NBS-LRR class)	Medtr0012s0290.1_disease_resistance_protein_(TIR-NBS-LRR_class),_putative_LC_scaffold0012:214659-202913_20140818
609.925	1.29502	5.89e-05	0.00261401	MSTRG.61766.2	1270	transmembrane protein, putative	Medtr8g066860.1_transmembrane_protein,_putative_LC_chr8:27838280-27839611_20140818
262.886	1.29441	3.62e-09	1.16e-06	MSTRG.72239.1	1395	---NA---	---NA---
137.343	1.29432	5.79e-08	1.13e-05	MSTRG.59511.16	1223	hypothetical protein MTR_5g073090	Medtr5g073090.1_hypothetical_protein_HC_chr5:31099060-31100828_20140818
699.343	1.29313	3.03e-07	4.35e-05	MSTRG.72724.2	549	60S acidic ribosomal protein P1	Medtr3g092600.1_60S_acidic_ribosomal_protein_HC_chr3:42321505-42319755_20140818
55.6855	1.29292	0.00100834	0.0202469	MSTRG.73031.2	297	ENTH/VHS/GAT family protein	Medtr7g072310.1_ENTH/VHS/GAT_family_protein_HC_chr7:26846469-26852490_20140818
517.166	1.29262	9.92e-05	0.00384906	MSTRG.55654.5	1210	hypothetical protein MTR_5g010555	Medtr5g010555.1_hypothetical_protein_HC_chr5:2852736-2852280_20140818
194.415	1.29234	4.95e-07	6.46e-05	173930_t	1533	hexose carrier protein HEX6-like	Medtr3g008170.1_sugar_porter_(SP)_family_MFS_transporter_HC_chr3:1355011-1357152_20140818
129.988	1.29181	0.000776132	0.0168634	MSTRG.2581.15	1635	poly [ADP-ribose] polymerase 3	Medtr4g053530.1_poly(ADP-ribose)_polymerase_domain_protein_HC_chr4:19342499-19346920_20140818
112.342	1.29072	0.00216088	0.0340203	MSTRG.12867.2	1663	ABC transporter family protein, putative	Medtr2g450200.1_ABC_transporter_family_protein,_putative_LC_chr2:22144751-22142842_20140818
149.413	1.29039	0.00337145	0.0460025	MSTRG.47549.1	389	BTB/POZ and MATH domain protein	Medtr8g006190.2_BTB/POZ_and_MATH_domain_protein_HC_chr8:536206-540898_20140818
120.476	1.28933	0.000271374	0.00797553	64900_t	456	hypothetical protein TSUD_33500	Medtr8g037820.1_hypothetical_protein_LC_chr8:14024449-14022998_20140818
3729.7	1.28882	0.00102094	0.0204111	MSTRG.39063.2	643	defensin-like protein	Medtr2g079440.1_Defensin_MtDef1.1/MtDef1.2_HC_chr2:33435244-33435770_20140818
87.9553	1.28811	0.00121831	0.023054	MSTRG.86084.8	474	---NA---	---NA---
88.4957	1.28706	2.53e-06	0.00023313	93593_t	465	14 kDa proline-rich protein DC2.15-like	Medtr4g101310.1_protease_inhibitor/seed_storage/LTP_family_protein_HC_chr4:41841657-41842329_20140818
49.5779	1.28641	0.00330752	0.0453859	MSTRG.30475.3	832	hypothetical protein MTR_7g007590	Medtr7g007590.1_hypothetical_protein_HC_chr7:1568478-1572061_20140818
88.0452	1.28638	0.00280654	0.0406965	MSTRG.36551.2	1452	tyrosyl-DNA phosphodiesterase	Medtr8g095490.1_tyrosyl-DNA_phosphodiesterase_HC_chr8:39969676-39961395_20140818
175.318	1.28575	5.95e-10	2.44e-07	MSTRG.45796.9	1054	F-box protein	Medtr7g096720.1_F-box_protein_LC_chr7:38815921-38812597_20140818
346.265	1.28514	5.35e-05	0.00243392	MSTRG.1434.1	769	hypothetical protein MTR_2g100440	Medtr2g100440.1_hypothetical_protein_HC_chr2:43161452-43160710_20140818
93.2944	1.28481	0.000840458	0.0178071	152242_t	555	NADH-ubiquinone oxidoreductase complex I, 21 kDa subunit	Medtr2g026500.1_NADH-ubiquinone_oxidoreductase_complex_I,_21_kDa_subunit_HC_chr2:9581138-9580356_20140818
60.9164	1.28475	0.00123214	0.0231838	MSTRG.32847.9	886	cysteine synthase-like isoform X1	Medtr1g081620.1_O-acetylserine_(thiol)_lyase_HC_chr1:36280172-36284490_20140818
758.085	1.28466	2.67e-08	5.9e-06	MSTRG.30495.3	745	plant/F18B13-26 protein	Medtr4g011060.1_plant/F18B13-26_protein_HC_chr4:2600967-2600575_20140818
53.9115	1.28443	9.85e-05	0.00383291	MSTRG.65245.3	1104	cyclin-like F-box protein	Medtr1g041245.1_cyclin-like_F-box_protein_HC_chr1:15330666-15327969_20140818
62.7667	1.28383	0.000887716	0.0185607	MSTRG.25349.7	1682	tyrosine kinase family protein	Medtr3g067795.1_tyrosine_kinase_family_protein_HC_chr3:30419973-30424611_20140818
87.5652	1.28296	5.98e-07	7.5e-05	65390_t	3633	translation initiation factor eIF-2B subunit epsilon	Medtr7g115610.1_initiation_factor-2Bepsilon-like_protein_HC_chr7:47797427-47785063_20140818
118.854	1.28286	0.000760035	0.0165933	MSTRG.42226.1	320	1-aminocyclopropane-1-carboxylate oxidase-like protein	Medtr8g009110.1_1-aminocyclopropane-1-carboxylate_oxidase-like_protein_HC_chr8:2032536-2035160_20140818
116.923	1.28246	0.00349424	0.0470822	MSTRG.2115.1	1372	serine/threonine protein phosphatase 2A 55 kDa regulatory subunit B beta isoform isoform X1	Medtr1g040810.1_protein_phosphatase_2A_55_kDa_regulatory_subunit_B_HC_chr1:18464856-18466358_20140818
313.54	1.28236	0.00270612	0.0396662	MSTRG.20666.3	495	transmembrane protein, putative	Medtr3g016080.1_transmembrane_protein,_putative_LC_chr3:4763213-4761952_20140818
291.379	1.28159	4.86e-07	6.36e-05	MSTRG.2640.1	387	---NA---	---NA---
176.094	1.28073	2.08e-08	4.79e-06	MSTRG.45796.8	1123	F-box protein	Medtr7g096720.1_F-box_protein_LC_chr7:38815921-38812597_20140818
42.9783	1.28026	0.00243825	0.0369932	155031_t	1269	alpha amylase domain protein	Medtr1g019480.1_alpha_amylase_domain_protein_HC_chr1:5884776-5886764_20140818
76.4866	1.27996	0.000309506	0.00878032	MSTRG.10638.4	703	transmembrane protein, putative	Medtr6g072515.1_hypothetical_protein_HC_chr6:26852904-26853960_20140818
519.26	1.27668	0.000299964	0.00857744	MSTRG.32185.1	2510	calcineurin-like metallo-phosphoesterase superfamily protein	Medtr5g072900.1_calcineurin-like_metallo-phosphoesterase_superfamily_protein_HC_chr5:31028256-31032484_20140818
49.3963	1.2761	0.00242755	0.0369032	MSTRG.12973.10	3486	rhodanese/cell cycle control phosphatase superfamily protein	Medtr3g084030.4_rhodanese/cell_cycle_control_phosphatase_superfamily_protein_LC_chr3:37957230-37933056_20140818
88.4242	1.27491	0.000113602	0.00423674	MSTRG.31506.1	250	Vacuolar ATP synthase catalytic subunit-related / V-ATPase-related / vacuolar proton pump-related	Medtr1g040050.1_hypothetical_protein_LC_chr1:14663752-14662257_20140818
1059.32	1.27487	1.49e-06	0.000154542	MSTRG.76762.1	1289	late embryogenesis abundant protein	Medtr4g120040.1_late_embryogenesis_abundant_protein_HC_chr4:49759382-49760884_20140818
308.325	1.27412	0.00198475	0.0321205	MSTRG.61341.2	1296	cinnamyl alcohol dehydrogenase	Medtr8g062440.3_cinnamyl_alcohol_dehydrogenase_HC_chr8:26099734-26103927_20140818
224.722	1.27404	0.00073933	0.0162905	MSTRG.41942.1	2230	C-terminal binding protein AN	Medtr7g078990.1_carboxy-terminal-binding_protein_AN_HC_chr7:29912264-29905927_20140818
37.827	1.27402	0.000378364	0.0101572	101885_t	600	serine carboxypeptidase-like protein	Medtr2g062990.1_serine_carboxypeptidase-like_protein_HC_chr2:26633521-26639654_20140818
383.1	1.27339	0.00111473	0.0217173	MSTRG.64323.2	2102	ubiquitin family protein	Medtr1g012210.1_ubiquitin_family_protein_LC_chr1:2382883-2382131_20140818
5398.74	1.27277	0.00346608	0.0468194	86717_t	1284	atp synthase subunit beta	Medtr0052s0070.1_senescence-associated_protein_HC_scaffold0052:21398-28183_20140818
70.6607	1.27076	6.7e-05	0.00287498	MSTRG.80721.2	1307	alpha/beta-hydrolase superfamily protein	Medtr8g086260.1_alpha/beta-hydrolase_superfamily_protein_HC_chr8:35763700-35771375_20140818
57.2815	1.27051	0.00253777	0.0379804	MSTRG.66236.1	329	gag-pol polyprotein	Medtr1g052130.1_hypothetical_protein_LC_chr1:21010395-21010649_20140818
1080.6	1.27029	1.51e-06	0.000155633	MSTRG.39429.2	1787	putative nucleoredoxin 1-like protein	Medtr8g064810.1_protein_disulfide_isomerase_(PDI)-like_protein_HC_chr8:27194182-27196762_20140818
124.204	1.26991	1.17e-05	0.000762556	MSTRG.16372.1	413	---NA---	---NA---
79.7721	1.26914	0.000135555	0.00481218	MSTRG.79832.1	1285	glutamate/leucine/phenylalanine/valine dehydrogenase	Medtr8g064920.1_hypothetical_protein_HC_chr8:27262541-27258382_20140818
110.959	1.26898	0.000148684	0.00515772	MSTRG.58629.2	1605	TPX2 (targeting protein for Xklp2) family protein	Medtr1g075310.1_TPX2_(targeting_protein_for_Xklp2)_family_protein_HC_chr1:33342141-33338595_20140818
49.9413	1.26855	0.00111283	0.0217022	MSTRG.45472.1	1338	alpha amylase domain protein	Medtr1g019480.1_alpha_amylase_domain_protein_HC_chr1:5884776-5886764_20140818
99.6284	1.26842	1.39e-06	0.000146584	MSTRG.45470.1	1330	enoyl-CoA hydratase/isomerase family protein	Medtr7g024300.1_enoyl-CoA_hydratase/isomerase_family_protein_HC_chr7:7973087-7974500_20140818
51.247	1.26716	0.00143914	0.0258199	10707_t	2256	probable disease resistance protein At5g66900	Medtr5g018910.1_plant_broad-spectrum_mildew_resistance_protein_RPW8_HC_chr5:7095143-7099246_20140818
115.111	1.26687	0.000330646	0.00920232	MSTRG.82216.4	856	F-box protein PP2-A13-like	Medtr0002s0020.1_F-box_protein_PP2-A13_HC_scaffold0002:6674-10318_20140818
105.768	1.26656	0.00122315	0.02309	MSTRG.81773.1	1851	TB2/DP1, HVA22 family protein	Medtr4g093510.1_TB2/DP1,_HVA22_family_protein_LC_chr4:36982943-36978372_20140818
78.8748	1.26617	0.000257888	0.00768909	MSTRG.42933.2	1680	receptor-like kinase	Medtr1g031580.1_receptor-like_kinase_HC_chr1:11039443-11041808_20140818
498.546	1.2656	2.51e-09	8.53e-07	MSTRG.80336.1	611	transmembrane protein, putative	Medtr3g464390.1_transmembrane_protein,_putative_HC_chr3:25876284-25870412_20140818
898.078	1.26537	0.00345588	0.0467366	MSTRG.9889.17	945	predicted protein	predicted protein
84.3661	1.26369	0.000943622	0.0193832	MSTRG.854.2	1048	DNA replication licensing factor MCM6	Medtr8g090000.1_minichromosome_maintenance_(MCM2/3/5)_family_protein_HC_chr8:37650442-37644876_20140818
56.5718	1.26368	0.00163382	0.028243	MSTRG.16428.2	707	---NA---	---NA---
134.287	1.26336	5.56e-05	0.0025048	MSTRG.55445.2	1217	---NA---	---NA---
327.232	1.26283	3e-05	0.00158577	147250_t	549	ubiquitin-like protein 5	Medtr3g084140.1_UBL5_ubiquitin-like_modifier_HC_chr3:38020793-38023315_20140818
43.2866	1.26276	0.000482847	0.0120457	MSTRG.88815.5	658	glutaredoxin 2	Medtr3g072590.1_glutaredoxin_2_HC_chr3:32662344-32660930_20140818
113.917	1.26268	0.00073829	0.0162783	130276_t	321	HR-like lesion-inducing protein	Medtr1g073940.1_HR-like_lesion-inducing_protein_HC_chr1:32860716-32858292_20140818
62.7388	1.2622	0.000229391	0.00706376	MSTRG.5933.5	836	protein FRA10AC1	Medtr8g037265.1_folate-sensitive_fragile_site_protein_FRA10AC1_HC_chr8:13834849-13841481_20140818
59.9425	1.26205	0.00086774	0.0182578	MSTRG.16606.1	452	ras-related protein RABC2a-like	Medtr1g090717.1_RAB_GTPase-like_protein_A5B_HC_chr1:40716435-40711176_20140818
162.409	1.2616	1.15e-05	0.000750347	139985_t	2433	zinc finger CCCH domain-containing protein 24	Medtr4g059550.1_zinc_finger_CCCH_domain_protein_HC_chr4:21946850-21939628_20140818
95.7455	1.26132	0.00245696	0.0371897	MSTRG.81006.2	800	---NA---	---NA---
59.9061	1.2611	0.000527243	0.0127944	MSTRG.69902.1	997	---NA---	---NA---
111.093	1.261	0.00205784	0.0329276	MSTRG.64292.3	1623	Ribonuclease H	Medtr8g470880.1_endonuclease/exonuclease/phosphatase_family_protein_LC_chr8:25755817-25753177_20140818
60.1563	1.2606	9.56e-05	0.00374461	116921_t	2238	negative cofactor 2 transcriptional co-repressor, putative	Medtr3g012030.2_negative_cofactor_2_transcriptional_co-repressor,_putative_HC_chr3:3186291-3181373_20140818
1079.82	1.26058	9.25e-07	0.000106348	MSTRG.83153.4	1158	myb transcription factor	Medtr4g063100.3_myb_transcription_factor_HC_chr4:23345888-23343932_20140818
1232.66	1.25989	0.000115724	0.00429726	MSTRG.85611.1	201	cytochrome P450 family 96 protein, putative	Medtr5g019820.1_hypothetical_protein_LC_chr5:7525320-7524963_20140818
187.468	1.2598	0.000373994	0.0100713	MSTRG.84552.1	423	---NA---	---NA---
65.0442	1.25971	0.00326583	0.0450252	90466_t	1314	DUF4408 domain protein	Medtr2g012320.1_DUF4408_domain_protein_HC_chr2:3037095-3035610_20140818
196.455	1.25939	5.54e-06	0.000425015	MSTRG.45021.4	783	---NA---	---NA---
92.544	1.25922	0.000859006	0.0181232	MSTRG.79559.1	1199	ankyrin repeat plant-like protein	Medtr8g019450.1_ankyrin_repeat_plant-like_protein_LC_chr8:6840141-6841792_20140818
116.533	1.25914	0.00018507	0.00606187	MSTRG.14402.8	1488	anaphase-promoting complex subunit 1	Medtr5g082890.1_anaphase-promoting_complex_subunit_1_HC_chr5:35723483-35692350_20140818
66.2804	1.25895	0.00181693	0.030293	MSTRG.83259.1	897	---NA---	---NA---
89.7673	1.25882	0.00112968	0.0219067	65977_t	330	ferulate 5-hydroxylase	Medtr8g076290.1_cytochrome_P450_family_monooxygenase_HC_chr8:32316653-32312590_20140818
127.601	1.25851	1.2e-06	0.000130661	MSTRG.62697.2	1620	E3 ubiquitin-protein ligase PRT1	Medtr4g022320.1_E3_ubiquitin-protein_ligase_PRT1-like_protein,_putative_HC_chr4:7389370-7382599_20140818
104.078	1.25728	0.000393967	0.0104564	MSTRG.18770.8	1014	poly(ADP-ribose) polymerase domain protein	Medtr4g053530.1_poly(ADP-ribose)_polymerase_domain_protein_HC_chr4:19342499-19346920_20140818
344.075	1.25712	0.000325006	0.00908692	MSTRG.14405.4	817	leucoanthocyanidin dioxygenase-like protein	Medtr5g082750.1_leucoanthocyanidin_dioxygenase-like_protein_HC_chr5:35617880-35612464_20140818
104.364	1.25626	6.34e-06	0.000471525	MSTRG.15560.8	571	phosphoinositide phosphatase SAC8 isoform X1	Medtr7g068890.1_phosphoinositide_phosphatase_SAC1_HC_chr7:25317283-25311691_20140818
344.965	1.25609	2.29e-07	3.46e-05	MSTRG.14466.1	2531	armadillo repeat only 1 protein	Medtr4g105110.2_armadillo_repeat_only_1_protein_HC_chr4:43549436-43551628_20140818
101.732	1.2554	0.000177137	0.00586503	MSTRG.12976.2	724	Calcium-dependent protein kinase 1	Medtr1g041150.1_calmodulin-domain_kinase_CDPK_protein_HC_chr1:18398807-18403890_20140818
46.2436	1.2554	0.00173189	0.0293552	MSTRG.81006.4	494	---NA---	---NA---
96.787	1.25374	0.000146222	0.00509716	MSTRG.46275.3	532	E3 ubiquitin ligase	Medtr8g020850.1_E3_ubiquitin_ligase_HC_chr8:7360874-7355214_20140818
60.8073	1.25333	0.0017179	0.0291917	13353_t	1497	putative receptor-like protein kinase At1g72540	Medtr4g125260.1_receptor-like_kinase_HC_chr4:51940056-51937267_20140818
67.6849	1.25297	0.0029974	0.0424859	MSTRG.71204.1	470	---NA---	---NA---
58.4987	1.2522	0.00018593	0.00608076	MSTRG.82634.5	1036	50S ribosomal protein L3-2, chloroplastic	Medtr1g093060.1_50S_ribosomal_protein_L3P_HC_chr1:41908852-41905135_20140818
3061.95	1.25196	4.09e-08	8.36e-06	78769_t	585	dormancy/auxin associated protein	Medtr7g112860.2_dormancy/auxin_associated_protein_HC_chr7:46439787-46442833_20140818
64.2894	1.25168	9.02e-05	0.00357005	MSTRG.55504.1	299	P-loop nucleoside triphosphate hydrolase superfamily protein	Medtr6g009520.1_P-loop_nucleoside_triphosphate_hydrolase_superfamily_protein_HC_chr6:2834239-2832401_20140818
53.2779	1.25166	1.53e-05	0.000946013	MSTRG.47263.8	803	RNA pseudouridine synthase 3, mitochondrial	Medtr7g029385.1_RNA_pseudouridine_synthase_HC_chr7:10453073-10460793_20140818
197.015	1.24911	4.83e-05	0.00225713	MSTRG.14402.5	2086	anaphase-promoting complex subunit 1	Medtr5g082890.1_anaphase-promoting_complex_subunit_1_HC_chr5:35723483-35692350_20140818
101.042	1.24896	0.000706591	0.0157801	MSTRG.13559.2	277	---NA---	---NA---
402.899	1.24882	0.00029604	0.00850037	MSTRG.68114.3	451	---NA---	Medtr6g034930.1_hypothetical_protein_LC_chr6:12218765-12220282_20140818
54.0636	1.24868	0.000128491	0.0046401	MSTRG.83923.1	1517	TMV resistance protein N-like	Medtr7g090730.1_hypothetical_protein_LC_chr7:35725867-35723628_20140818
60.6938	1.24748	0.00377993	0.0496435	189109_t	309	30S ribosomal S16-like protein	Medtr1g076310.1_30S_ribosomal_S16-like_protein_HC_chr1:33985781-33983377_20140818
703.228	1.24694	0.000265521	0.00785019	MSTRG.86067.7	2501	lipase	Medtr3g069720.1_lipase_HC_chr3:31213780-31210849_20140818
803.792	1.24693	0.000168582	0.00566531	MSTRG.86655.10	2933	TRAF superfamily protein, putative	Medtr8g089030.1_TRAF_superfamily_protein,_putative_LC_chr8:37006804-36991603_20140818
188.699	1.24688	1.14e-06	0.000125302	MSTRG.5933.1	1463	protein FRA10AC1	Medtr8g037265.1_folate-sensitive_fragile_site_protein_FRA10AC1_HC_chr8:13834849-13841481_20140818
881.672	1.2466	0.000185121	0.006062	MSTRG.61766.6	1068	transmembrane protein, putative	Medtr8g066860.1_transmembrane_protein,_putative_LC_chr8:27838280-27839611_20140818
130.448	1.24643	1.13e-06	0.000124323	MSTRG.81796.8	1706	protein MID1-COMPLEMENTING ACTIVITY 1-like	Medtr8g075150.1_MID1-complementing_activity-like_protein_HC_chr8:31773279-31768885_20140818
4841.73	1.24623	1.01e-05	0.00068245	MSTRG.64982.6	1094	non-symbiotic hemoglobin 1	Medtr4g068860.1_Non-symbiotic_hemoglobin_HC_chr4:25846162-25844617_20140818
511.321	1.24612	1.52e-06	0.000156392	MSTRG.30495.2	620	plant/F18B13-26 protein	Medtr4g011060.1_plant/F18B13-26_protein_HC_chr4:2600967-2600575_20140818
88.9497	1.24494	5.64e-05	0.00252994	MSTRG.80721.1	1792	alpha/beta-hydrolase superfamily protein	Medtr8g086260.3_alpha/beta-hydrolase_superfamily_protein_HC_chr8:35763700-35771361_20140818
148.436	1.24438	0.000221227	0.00688903	MSTRG.75979.2	276	hypothetical protein MTR_3g026785	Medtr3g026785.1_hypothetical_protein_HC_chr3:8251194-8250863_20140818
1049.41	1.24381	9.01e-07	0.00010445	MSTRG.27488.10	10275	CC-NBS-LRR resistance protein	Medtr8g028500.1_Rpp4C1_HC_chr8:10848011-10860059_20140818
54.486	1.24297	0.00106742	0.0210444	MSTRG.66444.1	392	---NA---	---NA---
180.331	1.24232	2.39e-06	0.000222815	MSTRG.83961.6	1954	UDP-glucosyltransferase family protein	Medtr5g072820.1_UDP-glucosyltransferase_family_protein_HC_chr5:30989979-30993244_20140818
62.0008	1.24215	0.00240625	0.0366669	MSTRG.45894.1	925	hypothetical protein MtrDRAFT_AC157375g12v1	Medtr7g083770.1_complex_1_protein,_LYR_family_protein_LC_chr7:32254532-32255924_20140818
254.334	1.2419	5.26e-05	0.00240176	MSTRG.71660.1	636	---NA---	---NA---
163.022	1.24179	3.43e-05	0.00175581	159617_t	1218	LMBR1 domain-containing protein 2 homolog A	Medtr3g086840.1_LMBR1_integral_membrane-like_protein_HC_chr3:39370616-39360812_20140818
72.047	1.24131	0.000585635	0.0137863	MSTRG.67440.3	644	---NA---	---NA---
558.654	1.24118	0.000335645	0.00930878	MSTRG.86067.4	2776	lipase	Medtr3g069720.1_lipase_HC_chr3:31213780-31210849_20140818
113.141	1.24079	0.000185469	0.00607065	MSTRG.6274.12	819	F-box protein interaction domain protein	Medtr4g107820.1_F-box_protein_interaction_domain_protein_HC_chr4:44688868-44687702_20140818
98.5528	1.24057	0.00194393	0.0316674	MSTRG.53447.1	1306	carboxylesterase 1-like	Medtr6g464510.1_gibberellin_receptor_GID1,_putative_HC_chr6:22492170-22496685_20140818
67.5273	1.24038	0.00102542	0.0204796	129081_t	2622	UDP-glucose pyrophosphorylase	Medtr3g071440.1_UDP-glucose_pyrophosphorylase_HC_chr3:32047589-32039369_20140818
477.777	1.24021	3.73e-08	7.72e-06	MSTRG.79195.1	1212	---NA---	---NA---
415.201	1.2394	0.000644576	0.0147852	MSTRG.82699.2	1294	flavonol synthase/flavanone 3-hydroxylase	Medtr5g059140.1_flavonol_synthase/flavanone_3-hydroxylase_HC_chr5:24404215-24409901_20140818
122.985	1.2392	0.000116616	0.0043192	73994_t	1533	glycosyltransferase family 90 protein	Medtr8g031470.1_glycosyltransferase_family_90_protein_HC_chr8:11807748-11811706_20140818
1280.09	1.23908	8.61e-11	4.85e-08	MSTRG.69670.2	687	---NA---	---NA---
127.243	1.23797	0.00108486	0.0212933	MSTRG.17199.35	1150	UPF0614 protein/C14orf102-like protein	Medtr6g472250.1_hypothetical_protein_HC_chr6:26062743-26064085_20140818
857.77	1.23652	7.49e-10	2.98e-07	MSTRG.85283.1	365	---NA---	---NA---
220.128	1.23646	2.58e-05	0.00140597	110376_t	690	ubiquitin-conjugating enzyme E2 35	Medtr2g078010.4_ubiquitin-conjugating_enzyme_HC_chr2:32320407-32326653_20140818
46.5456	1.23639	0.00120817	0.0229266	29401_t	486	glycoside hydrolase family 1 protein	Medtr4g016920.2_glycoside_hydrolase_family_1_protein_HC_chr4:5220628-5215987_20140818
132.436	1.23639	0.000649053	0.0148571	MSTRG.70027.1	297	Alpha tubulin	Medtr3g110720.1_tubulin_beta-1_chain_HC_chr3:51753324-51750944_20140818
142.344	1.23612	0.000174134	0.00579532	MSTRG.84055.3	1402	FAR1 DNA-binding domain protein	Medtr1g070355.1_FAR1_DNA-binding_domain_protein_LC_chr1:31110429-31113072_20140818
1019.06	1.23589	0.000155476	0.00533245	MSTRG.86655.12	4184	TRAF superfamily protein, putative	Medtr8g089030.1_TRAF_superfamily_protein,_putative_LC_chr8:37006804-36991603_20140818
510.353	1.23551	1.47e-08	3.6e-06	MSTRG.80336.2	588	transmembrane protein, putative	Medtr3g464390.1_transmembrane_protein,_putative_HC_chr3:25876284-25870412_20140818
50.8488	1.23534	7.58e-05	0.00314713	153201_t	918	polyketide cyclase/dehydrase and lipid transporter	Medtr1g085550.1_polyketide_cyclase/dehydrase_and_lipid_transporter_HC_chr1:38218317-38214482_20140818
80.1262	1.235	0.000560142	0.0133711	MSTRG.86695.3	1306	shikimate kinase 1, chloroplastic-like	Medtr6g033510.2_shikimate_kinase_HC_chr6:10838651-10833939_20140818
533.218	1.23452	3.34e-11	2.11e-08	MSTRG.25165.2	1630	seven in absentia family protein	Medtr5g076540.1_seven_in_absentia_family_protein_LC_chr5:32662970-32661958_20140818
255.828	1.2342	0.00363947	0.0483521	MSTRG.38933.2	276	---NA---	---NA---
55.2251	1.2331	0.000691213	0.0155487	MSTRG.49446.2	471	coiled-coil protein (DUF572)	Medtr8g008730.2_coiled-coil_protein_HC_chr8:1835765-1842629_20140818
376.798	1.23191	0.00022149	0.00689308	MSTRG.88367.1	5104	modifier OF SNC1 1, putative	Medtr3g077440.1_modifier_OF_SNC1_1,_putative_HC_chr3:34767661-34777932_20140818
1025.24	1.23146	0.000114034	0.00424979	MSTRG.64982.15	1059	non-symbiotic hemoglobin 1	Medtr4g068860.1_Non-symbiotic_hemoglobin_HC_chr4:25846162-25844617_20140818
178.832	1.23105	1.3e-06	0.00013942	MSTRG.69546.1	2095	calmodulin-binding protein	Medtr7g111980.1_calmodulin-binding_protein_LC_chr7:46033260-46029612_20140818
63.548	1.23086	0.000111722	0.0041939	MSTRG.86557.1	274	---NA---	---NA---
2736.37	1.22907	1.97e-06	0.000193222	MSTRG.619.1	1030	probable glutathione S-transferase	Medtr8g087410.1_glutathione_S-transferase_HC_chr8:36120245-36121742_20140818
1185.27	1.22903	4.7e-07	6.18e-05	MSTRG.83153.2	1349	myb transcription factor	Medtr4g063100.1_myb_transcription_factor_HC_chr4:23345888-23343932_20140818
74.4252	1.22897	0.00142852	0.0256977	MSTRG.5780.1	5283	disease resistance protein (TIR-NBS-LRR class), putative	Medtr3g006280.1_disease_resistance_protein_(TIR-NBS-LRR_class)_LC_chr3:612952-621261_20140818
89.744	1.22876	0.000786263	0.01701	152946_t	861	DUF4408 domain protein	Medtr2g012320.1_DUF4408_domain_protein_HC_chr2:3037095-3035610_20140818
94.841	1.2287	0.00258795	0.0384883	MSTRG.81006.1	764	---NA---	---NA---
281.89	1.22806	3.43e-05	0.00175581	MSTRG.66831.1	273	---NA---	---NA---
82.446	1.22783	0.000250209	0.00750781	10030_t	1779	pentatricopeptide repeat-containing protein At3g13880	Medtr6g022140.1_pentatricopeptide_(PPR)_repeat_protein_HC_chr6:7700828-7696262_20140818
410.57	1.22667	6.6e-05	0.00284575	MSTRG.84699.1	1212	peptide transporter PTR3-like protein	Medtr1g041885.1_peptide_transporter_PTR3-like_protein_HC_chr1:15764569-15766998_20140818
835.291	1.22594	0.000114898	0.00427455	MSTRG.30071.3	271	---NA---	---NA---
328.885	1.22584	0.000955824	0.0195426	MSTRG.73999.4	835	---NA---	---NA---
69.9756	1.22562	0.00206846	0.0330224	MSTRG.41141.2	1484	disease resistance protein (CC-NBS-LRR class) family protein	Medtr2g089975.1_disease_resistance_protein_(CC-NBS-LRR_class)_family_protein_LC_chr2:38061396-38047850_20140818
215.915	1.22557	0.00136485	0.0248671	MSTRG.53269.1	818	RALF-like protein	Medtr8g010200.1_RALF-like_protein_HC_chr8:2610443-2609370_20140818
83.4231	1.22545	0.000146784	0.00510897	160786_t	6882	PREDICTED: uncharacterized protein LOC106798255	Medtr5g057040.1_F-box_protein_interaction_domain_protein_LC_chr5:23755020-23750688_20140818
605.726	1.22512	5.24e-05	0.0023941	MSTRG.10850.1	232	---NA---	---NA---
138.153	1.22441	0.00316141	0.0440601	MSTRG.10647.1	1650	XH/XS domain protein	Medtr8g078970.1_DUF1162_family_protein_HC_chr8:33685838-33657743_20140818
67.0167	1.22422	0.00265814	0.0391672	MSTRG.69081.1	3747	PREDICTED: uncharacterized protein LOC101512466	Medtr5g061300.1_hypothetical_protein_LC_chr5:25477205-25475100_20140818
255.537	1.22385	1.3e-06	0.000139474	MSTRG.18549.1	1576	TGB12K interacting protein	Medtr1g054620.1_hypothetical_protein_LC_chr1:23739173-23734463_20140818
479.661	1.22291	6.12e-08	1.18e-05	MSTRG.72239.3	1245	---NA---	---NA---
378.731	1.22247	0.000318789	0.00896873	MSTRG.61767.1	219	---NA---	---NA---
1067.26	1.2222	9.25e-07	0.000106348	MSTRG.79223.1	669	thioredoxin-like protein 4A isoform X2	Medtr3g108770.1_mRNA_splicing_factor,_thioredoxin-like_U5_snRNP_protein_HC_chr3:50238238-50236330_20140818
84.8662	1.22207	0.000592715	0.0139128	98665_t	3246	LRR and NB-ARC domain disease resistance protein, putative	Medtr5g028750.1_CC-NBS-LRR_resistance_protein,_putative_LC_chr5:12037298-12040904_20140818
239.847	1.22148	6.39e-06	0.000474853	MSTRG.66831.2	270	---NA---	---NA---
146.554	1.2207	0.000655919	0.0149722	MSTRG.48685.8	3774	RNA-binding (RRM/RBD/RNP motif) family protein	Medtr2g093100.1_RNA-binding_(RRM/RBD/RNP_motif)_family_protein_HC_chr2:39662303-39653214_20140818
93.9544	1.22069	0.000141648	0.00498058	MSTRG.51143.3	1425	MYB-like transcription factor family protein	Medtr8g086410.2_MYB-like_transcription_factor_family_protein_HC_chr8:35847826-35851675_20140818
58.1765	1.22001	0.00117122	0.0224814	MSTRG.74727.3	842	TATA-binding protein associated factor-like protein	Medtr4g035100.1_TATA-binding_protein_associated_factor-like_protein_HC_chr4:12002197-12022121_20140818
606.707	1.21983	8.19e-07	9.69e-05	MSTRG.16276.1	2307	Serine/Threonine-kinase rio2	Medtr4g094615.1_Serine/Threonine-kinase_rio2_HC_chr4:38390417-38383829_20140818
312.848	1.21853	4.05e-05	0.00197906	MSTRG.18836.4	1276	Rj2 protein	Medtr6g078630.1_disease_resistance_protein_(TIR-NBS-LRR_class)_HC_chr6:29530050-29528847_20140818
438.649	1.21759	1.72e-10	9.04e-08	116883_t	1560	isoaspartyl peptidase/L-asparaginase	Medtr4g109900.1_isoaspartyl_peptidase/L-asparaginase_HC_chr4:45733594-45731329_20140818
194.324	1.21755	2.92e-05	0.00155133	97430_t	693	heavy metal transport/detoxification superfamily protein	Medtr1g099800.1_heavy_metal_transport/detoxification_superfamily_protein_HC_chr1:45036922-45034974_20140818
92.4213	1.21678	0.000226119	0.00699077	31335_t	864	F-box protein pp2-a13-like	Medtr0002s0020.1_F-box_protein_PP2-A13_HC_scaffold0002:6674-10318_20140818
53.094	1.21566	0.000683415	0.0154293	MSTRG.58629.10	711	outer envelope protein 80, chloroplastic	Medtr2g098110.1_outer_membrane_OMP85_family_protein_HC_chr2:41921668-41929992_20140818
220.954	1.21425	0.000356243	0.00972001	100791_t	399	abscisic acid receptor PYL4-like	Medtr4g014460.1_abscisic_acid_receptor_HC_chr4:4083299-4081745_20140818
370.133	1.2142	0.000777133	0.0168762	MSTRG.73999.2	1265	hypothetical protein MTR_5g043280	Medtr5g043280.1_hypothetical_protein_HC_chr5:19027903-19029338_20140818
70.1288	1.21399	0.000717736	0.0159439	56294_t	2631	receptor-like kinase	Medtr1g031540.1_receptor-like_kinase_LC_chr1:11024243-11031028_20140818
99.6062	1.21375	0.000266882	0.00787915	MSTRG.59037.2	2153	nucleoporin autopeptidase	Medtr1g078040.2_nucleoporin_autopeptidase_HC_chr1:34898558-34890792_20140818
281.854	1.21344	0.00213409	0.0337434	MSTRG.61341.3	980	cinnamyl alcohol dehydrogenase	Medtr8g062440.1_cinnamyl_alcohol_dehydrogenase_HC_chr8:26099624-26105442_20140818
76.4979	1.21342	0.00350589	0.047207	MSTRG.854.3	1071	PREDICTED: uncharacterized protein LOC101502704	Medtr8g063200.1_DUF4228_domain_protein_HC_chr8:26461240-26460444_20140818
111.854	1.21338	0.00106239	0.0209853	MSTRG.21288.3	618	---NA---	---NA---
108.701	1.2129	0.00108132	0.0212401	MSTRG.77445.2	1972	DUF674 family protein	Medtr7g066340.1_DUF674_family_protein_LC_chr7:24146371-24144089_20140818
72.3508	1.21284	0.000265018	0.00784282	MSTRG.48311.1	585	structural constituent of ribosome protein, putative	Medtr2g021040.2_structural_constituent_of_ribosome_protein,_putative_HC_chr2:7107810-7113276_20140818
61.438	1.2128	0.00244701	0.0370935	MSTRG.63724.6	1176	RPAP1-like, carboxy-terminal protein	Medtr5g046240.1_RPAP1-like,_carboxy-terminal_protein_HC_chr5:20281096-20271961_20140818
251.97	1.2126	3.36e-07	4.73e-05	MSTRG.45021.6	658	---NA---	---NA---
186.487	1.21243	1.05e-05	0.000699803	MSTRG.78892.1	551	---NA---	---NA---
517.703	1.21174	6.22e-06	0.000464102	MSTRG.45597.3	291	---NA---	---NA---
41.3895	1.21043	0.00100462	0.0201918	57106_t	909	PREDICTED: uncharacterized protein LOC101512620	Medtr5g005640.1_hypothetical_protein_LC_chr5:557041-556669_20140818
101.227	1.21008	0.000508066	0.0124578	MSTRG.9544.3	753	polyneuridine-aldehyde esterase	Medtr5g018365.1_methyl_esterase_HC_chr5:6842052-6844288_20140818
53.1511	1.209	0.000944938	0.0194076	MSTRG.43880.2	610	bifunctional aspartate aminotransferase and glutamate/aspartate-prephenate aminotransferase-like protein	Medtr7g106830.1_aspartate_aminotransferase_HC_chr7:43516177-43513083_20140818
95.874	1.20873	0.00151944	0.0268047	MSTRG.38680.2	246	huntingtin-interacting K-like protein	Medtr2g034010.1_huntingtin-interacting_K-like_protein_HC_chr2:12970294-12973745_20140818
470.877	1.20759	0.00177627	0.0298497	MSTRG.19767.1	315	---NA---	---NA---
100.601	1.20698	2.38e-05	0.00131882	MSTRG.55445.3	876	---NA---	---NA---
161.588	1.20663	5.54e-05	0.00249772	MSTRG.59343.6	2146	polyadenylate-binding protein RBP47C	Medtr3g101370.2_polyadenylate-binding_protein_RBP47C_HC_chr3:46662442-46658399_20140818
102.768	1.20646	6.52e-05	0.00281741	MSTRG.62946.3	1686	digalactosyldiacylglycerol synthase	Medtr6g091670.1_digalactosyldiacylglycerol_synthase_HC_chr6:34526786-34522519_20140818
259.612	1.20556	7.42e-07	8.91e-05	MSTRG.72908.1	530	UDP-glucosyltransferase family protein	Medtr5g019580.2_UDP-glucosyltransferase_family_protein_HC_chr5:7404213-7406208_20140818
378.927	1.20553	0.0003547	0.00969322	MSTRG.70124.1	1680	stress up-regulated Nod 19 protein	Medtr2g030470.1_stress_up-regulated_Nod_19_protein_LC_chr2:11471036-11480994_20140818
141.62	1.20454	0.000228997	0.00705583	MSTRG.29465.3	2378	disease resistance protein (TIR-NBS-LRR class)	Medtr3g058880.2_disease_resistance_protein_(TIR-NBS-LRR_class)_HC_chr3:23501701-23490353_20140818
325.308	1.2042	3.87e-11	2.38e-08	MSTRG.60297.2	1502	seven in absentia family protein	Medtr5g076540.1_seven_in_absentia_family_protein_LC_chr5:32662970-32661958_20140818
230.681	1.20407	0.00371152	0.0489943	MSTRG.46359.1	930	NBS-LRR type disease resistance protein	Medtr8g011170.1_NB-ARC_domain_disease_resistance_protein_LC_chr8:2912219-2908997_20140818
130.696	1.20368	2.43e-06	0.000226377	MSTRG.29095.1	1185	F-box protein interaction domain protein	Medtr3g010590.1_F-box_protein_interaction_domain_protein_LC_chr3:2491125-2496268_20140818
81.6393	1.20365	0.00277753	0.0403773	MSTRG.81243.2	3217	protein weak chloroplast movement under blue light 1-like	Medtr1g019490.1_WEAK_movement_UNDER_BLUE_LIGHT-like_protein_HC_chr1:5891628-5887207_20140818
42.5326	1.20356	0.00350384	0.0471854	94213_t	369	coiled-coil protein (DUF572)	Medtr8g008730.2_coiled-coil_protein_HC_chr8:1835765-1842629_20140818
81.0618	1.20278	0.000214133	0.00672771	MSTRG.46275.2	545	E3 ubiquitin-protein ligase SPL2	Medtr8g020850.1_E3_ubiquitin_ligase_HC_chr8:7360874-7355214_20140818
384.677	1.20251	0.000624842	0.0144523	MSTRG.55144.1	448	polygalacturonase inhibitor protein	Medtr7g023670.1_polygalacturonase_inhibiting_protein,_putative_LC_chr7:7731931-7730805_20140818
181.244	1.20196	3.86e-05	0.00191467	MSTRG.17199.27	753	protein NRDE2 homolog isoform X1	Medtr4g016590.1_hypothetical_protein_HC_chr4:5074660-5083977_20140818
446.266	1.20175	8.77e-06	0.000608559	MSTRG.86213.4	321	---NA---	Medtr7g116360.2_polyubiquitin_3_HC_chr7:47989622-47990311_20140818
181.707	1.20104	3.94e-05	0.00194389	MSTRG.58161.6	308	---NA---	---NA---
185.17	1.19979	8.93e-05	0.00354969	MSTRG.37871.1	353	---NA---	---NA---
57.442	1.19861	0.00198202	0.0321089	MSTRG.16535.3	728	protein FAR1-RELATED SEQUENCE 5-like	Medtr6g017200.1_FAR1_DNA-binding_domain_protein_LC_chr6:6826866-6827729_20140818
293.317	1.19838	1.57e-05	0.000963981	MSTRG.61701.2	2515	copper amine oxidase, enzyme domain protein	Medtr8g069505.3_copper_amine_oxidase,_enzyme_domain_protein_HC_chr8:29135429-29141868_20140818
161.499	1.19651	0.000108867	0.00411264	68485_t	819	delta(3,5)-Delta(2,4)-dienoyl-CoA isomerase, peroxisomal	Medtr3g085700.1_enoyl-CoA_hydratase/delta3,5-delta2,4-dienoyl-CoA_isomerase_HC_chr3:38775971-38777283_20140818
3978.99	1.19609	0.00340455	0.0463069	54057_t	1098	keratin-associated protein 10-6-like	Medtr3g067965.1_hypothetical_protein_LC_chr3:30598335-30599266_20140818
102.564	1.19583	0.00342665	0.0464668	MSTRG.35446.1	1425	DUF1262 family protein	Medtr5g035760.1_DUF1262_family_protein_HC_chr5:15550371-15551866_20140818
831.171	1.19583	0.000211254	0.0066615	MSTRG.10896.4	776	hypothetical protein glysoja_044789	Medtr5g089380.1_hypothetical_protein_LC_chr5:38848771-38849072_20140818
275.835	1.19556	3.44e-05	0.00175794	MSTRG.47330.2	1483	heavy metal transport/detoxification superfamily protein	Medtr1g099800.1_heavy_metal_transport/detoxification_superfamily_protein_HC_chr1:45036922-45034974_20140818
446.535	1.19447	1.94e-05	0.0011283	185443_t	342	HMG1/2-like protein	Medtr8g073345.2_high_mobility_group_(HMG)-box_protein_HC_chr8:31116058-31114418_20140818
149.275	1.19272	8.14e-05	0.00331543	MSTRG.12882.17	1602	---NA---	---NA---
320.677	1.19237	3.77e-05	0.00187839	MSTRG.18836.2	1392	disease resistance protein (TIR-NBS-LRR class)	Medtr6g078630.1_disease_resistance_protein_(TIR-NBS-LRR_class)_HC_chr6:29530050-29528847_20140818
161.017	1.19233	0.00220398	0.0345208	MSTRG.46330.1	426	RALF-like protein	Medtr8g010200.1_RALF-like_protein_HC_chr8:2610443-2609370_20140818
105.234	1.19195	0.000134523	0.00478982	2960_t	4218	global transcription factor	Medtr7g088700.1_global_transcription_factor_HC_chr7:34591539-34580098_20140818
137.749	1.19167	0.000222393	0.00690895	MSTRG.42879.2	333	zinc finger, C3HC4 type family protein, putative	Medtr4g459450.1_zinc_finger,_C3HC4_type_family_protein,_putative_HC_chr4:21880077-21878022_20140818
197.95	1.19099	0.000691535	0.0155524	MSTRG.63689.1	246	---NA---	---NA---
1472.7	1.19004	0.00379277	0.0497626	MSTRG.81523.3	465	---NA---	---NA---
177.931	1.18955	0.00236892	0.0362575	MSTRG.86695.6	1241	shikimate kinase 1, chloroplastic-like	Medtr6g033510.2_shikimate_kinase_HC_chr6:10838651-10833939_20140818
151.829	1.18884	0.000747092	0.0164195	MSTRG.17199.36	1669	UPF0614 protein/C14orf102-like protein	Medtr6g472250.1_hypothetical_protein_HC_chr6:26062743-26064085_20140818
339.485	1.18825	0.00307899	0.0432578	16853_t	3963	5'-3' exoribonuclease 3 isoform X1	Medtr7g114570.2_5'-3'_exoribonuclease_HC_chr7:47305880-47315956_20140818
304.632	1.18788	7.73e-06	0.000550704	MSTRG.34868.1	823	putative E3 ubiquitin-protein ligase LIN-1 isoform X1	Medtr1g090320.1_E3_ubiquitin-protein_ligase_LIN-like_protein,_putative_HC_chr1:40463501-40471127_20140818
553.848	1.18744	3.52e-06	0.000301504	MSTRG.15708.2	407	---NA---	---NA---
103.949	1.18697	2.83e-05	0.0015156	183171_t	1137	probable protein phosphatase 2C 25	Medtr5g071550.1_serine/threonine_phosphatase_family,_2C_domain_protein_HC_chr5:30372747-30375121_20140818
121.691	1.18682	0.00294968	0.0420667	MSTRG.44880.1	5801	cysteine-rich receptor-kinase-like protein	Medtr1g105640.3_cysteine-rich_receptor-kinase-like_protein_HC_chr1:47624899-47629909_20140818
340.882	1.18655	0.000602166	0.0140605	MSTRG.38502.1	5131	frigida-LIKE protein	Medtr2g091250.1_frigida-LIKE_protein_LC_chr2:39392129-39385795_20140818
1889.87	1.1864	5.98e-05	0.00264217	MSTRG.61766.7	440	---NA---	---NA---
127.293	1.1863	0.000437455	0.011254	MSTRG.46388.3	3501	NB-ARC domain disease resistance protein	Medtr8g011550.1_NB-ARC_domain_disease_resistance_protein_LC_chr8:3142903-3139894_20140818
83.9352	1.18613	0.000396831	0.0105144	MSTRG.17309.3	1275	E3 ubiquitin-protein ligase UPL6	Medtr2g033040.1_E3_ubiquitin-protein_ligase_UPL6_HC_chr2:12491348-12468569_20140818
221.69	1.18573	7.2e-05	0.00302975	MSTRG.42879.3	340	zinc finger, C3HC4 type family protein, putative	Medtr4g459450.1_zinc_finger,_C3HC4_type_family_protein,_putative_HC_chr4:21880077-21878022_20140818
376.502	1.18561	0.000436149	0.0112344	MSTRG.70124.2	1540	stress up-regulated Nod 19 protein	Medtr2g030470.1_stress_up-regulated_Nod_19_protein_LC_chr2:11471036-11480994_20140818
208.649	1.18527	3.31e-05	0.00170451	MSTRG.17199.24	990	protein NRDE2 homolog isoform X1	Medtr4g016590.1_hypothetical_protein_HC_chr4:5074660-5083977_20140818
51.8281	1.18512	0.00290333	0.0416019	31545_t	3255	calcium-dependent phospholipid-binding copine family protein	Medtr8g447220.1_calcium-dependent_phospholipid-binding_copine_family_protein_HC_chr8:18538541-18545058_20140818
157.043	1.18509	0.000780229	0.0169126	MSTRG.41854.5	566	---NA---	---NA---
402.979	1.1847	2.45e-06	0.000227399	MSTRG.1057.1	788	ATP-dependent Clp protease adapter protein CLPS1, chloroplastic-like	Medtr5g054770.1_ATP-dependent_Clp_protease_adaptor_protein_ClpS_HC_chr5:22566023-22570033_20140818
263.201	1.18443	3.82e-06	0.000321243	118331_t	813	cysteine-rich TM module stress tolerance protein	Medtr2g069420.1_cysteine-rich_TM_module_stress_tolerance_protein_HC_chr2:28863285-28862334_20140818
237.907	1.18317	0.000104937	0.00399928	MSTRG.32639.5	230	receptor-like protein	Medtr5g089380.1_hypothetical_protein_LC_chr5:38848771-38849072_20140818
290.476	1.18255	5.57e-06	0.000426339	MSTRG.70902.1	1460	bidirectional sugar transporter SWEET2-like	Medtr2g073190.1_sodium_bile_acid_symporter_family_protein_LC_chr2:30991272-30983345_20140818
146.982	1.18229	0.000364451	0.00987779	64683_t	648	VQ motif protein	Medtr3g081500.1_VQ_motif_protein_HC_chr3:36904409-36905059_20140818
69.8656	1.18057	0.000949923	0.0194739	MSTRG.72118.18	1519	glycosyltransferase family 90 protein	Medtr8g031470.1_glycosyltransferase_family_90_protein_HC_chr8:11807748-11811706_20140818
63.2692	1.18023	0.000368044	0.00995429	MSTRG.33873.1	1036	hypothetical protein TSUD_220720	Medtr7g033950.1_hypothetical_protein_HC_chr7:12510835-12509838_20140818
1032.16	1.17996	3.82e-06	0.000321243	MSTRG.54741.1	1824	---NA---	---NA---
161.724	1.17986	0.0024326	0.0369473	MSTRG.3185.8	1612	vacuolar protein sorting-associated protein 32 homolog 2-like	Medtr6g090515.1_charged_multivesicular_body_protein_HC_chr6:34403252-34407494_20140818
178.787	1.17968	8.23e-06	0.000578618	48301_t	1269	60S ribosomal protein L3-1-like	Medtr1g098540.1_60S_ribosomal_protein_L3B_HC_chr1:44369848-44366402_20140818
70.293	1.17931	0.000870062	0.0182917	MSTRG.3891.2	489	---NA---	---NA---
78.8466	1.17894	7.56e-05	0.00314443	88466_t	453	hypothetical protein MTR_5g027940	Medtr5g027940.1_hypothetical_protein_HC_chr5:11666453-11669433_20140818
387.087	1.17847	2.46e-05	0.00135285	MSTRG.32639.2	439	receptor-like protein kinase	Medtr5g089380.1_hypothetical_protein_LC_chr5:38848771-38849072_20140818
1117.71	1.17794	6.43e-08	1.23e-05	MSTRG.73634.2	1347	hypothetical protein TanjilG_03599	Medtr0055s0090.1_senescence-associated_protein_HC_scaffold0055:37627-50614_20140818
200.621	1.17736	6.95e-05	0.00295773	MSTRG.39580.7	1592	---NA---	---NA---
115.126	1.17701	0.00127811	0.0237904	MSTRG.49204.6	1659	1-O-acylglucose:anthocyanin acyltransferase	Medtr2g018590.1_1-O-acylglucose:anthocyanin_acyltransferase_HC_chr2:5856917-5861023_20140818
74.9055	1.17654	0.00107182	0.0211096	MSTRG.8507.1	1513	hypothetical protein TSUD_55920	Medtr3g052720.1_organelle_transcript_processing_protein,_putative_HC_chr3:20868148-20864227_20140818
131.418	1.17653	3.12e-05	0.0016348	MSTRG.43076.1	328	---NA---	---NA---
59.4185	1.17561	0.00238148	0.0364107	MSTRG.35838.2	366	---NA---	---NA---
383.381	1.17547	3.27e-05	0.00169107	MSTRG.32639.7	360	50S ribosomal protein l4-like	Medtr5g089380.1_hypothetical_protein_LC_chr5:38848771-38849072_20140818
371.545	1.17311	2.17e-08	4.97e-06	MSTRG.7745.3	634	probable protein phosphatase 2C 9 isoform X1	Medtr4g094208.1_protein_phosphatase_2C-like_protein_HC_chr4:37430585-37425644_20140818
1082.38	1.1727	0.000441694	0.0113179	MSTRG.59703.1	558	---NA---	---NA---
140.179	1.17269	0.00050273	0.0123802	MSTRG.39980.2	487	ENTH/VHS/GAT family protein	Medtr7g072310.1_ENTH/VHS/GAT_family_protein_HC_chr7:26846469-26852490_20140818
66.7145	1.17241	0.00074028	0.0163022	MSTRG.24677.9	3591	neutral alpha-glucosidase	Medtr5g026610.1_neutral_alpha-glucosidase_HC_chr5:10956765-10969165_20140818
106.593	1.17224	0.00143592	0.025774	MSTRG.854.4	1370	hypothetical protein MTR_0232s0030	Medtr0232s0030.1_hypothetical_protein_HC_scaffold0232:12112-14908_20140818
372.191	1.17206	1.12e-05	0.000739029	MSTRG.5896.1	390	---NA---	---NA---
92.4332	1.17168	6.01e-07	7.52e-05	MSTRG.64933.2	924	acyl-coenzyme A thioesterase-like protein	Medtr3g098170.1_acyl-coenzyme_A_thioesterase-like_protein_LC_chr3:44801602-44799273_20140818
63.1578	1.17139	0.00103802	0.0206554	177602_t	1338	ribonuclease H	Medtr8g101620.1_hypothetical_protein_LC_chr8:42708243-42708852_20140818
300.276	1.17089	0.00349675	0.0471063	MSTRG.68114.4	426	---NA---	Medtr6g034930.1_hypothetical_protein_LC_chr6:12218765-12220282_20140818
409.897	1.17079	2.6e-05	0.00141443	46177_t	471	BZIP transcription factor bZIP124	Medtr4g070860.1_BZIP_transcription_factor_bZIP124_HC_chr4:26689519-26691112_20140818
51.9664	1.1705	0.00138641	0.0251593	MSTRG.1841.12	1530	flavin containing monooxygenase FMO GS-OX-like protein	Medtr8g037910.1_flavin_containing_monooxygenase_FMO_GS-OX-like_protein_HC_chr8:14046363-14042504_20140818
212.577	1.17011	0.00158337	0.0276017	MSTRG.73999.1	763	hypothetical protein MTR_5g043280	Medtr5g043280.1_hypothetical_protein_HC_chr5:19027903-19029338_20140818
76.3162	1.16972	0.000219188	0.00684202	MSTRG.60339.11	1765	serine carboxypeptidase-like protein	Medtr7g080180.1_serine_carboxypeptidase-like_protein_HC_chr7:30489482-30482239_20140818
88.2136	1.16938	0.000579946	0.0136855	MSTRG.7921.2	586	histone acetyltransferase KAT6A	Medtr1g084990.1_hypothetical_protein_LC_chr1:37943685-37937964_20140818
95.4798	1.16925	2.59e-05	0.00141168	MSTRG.64933.5	815	acyl-coenzyme A thioesterase-like protein	Medtr3g098160.1_acyl-coenzyme_A_thioesterase-like_protein_LC_chr3:44798069-44796369_20140818
2623.59	1.16841	4.89e-05	0.00227829	MSTRG.61766.10	704	transmembrane protein, putative	Medtr8g066860.1_transmembrane_protein,_putative_LC_chr8:27838280-27839611_20140818
67.4272	1.1684	0.00324938	0.0448704	MSTRG.21356.1	425	---NA---	---NA---
684.845	1.16794	4.37e-10	1.9e-07	MSTRG.25165.1	1684	seven in absentia family protein	Medtr5g067400.1_seven_in_absentia_family_protein_LC_chr5:28473641-28475712_20140818
69.5628	1.16789	0.00253067	0.0379202	160360_t	315	GTP-binding protein SAR1A	Medtr2g034640.1_Ras-related_small_GTP-binding_family_protein_HC_chr2:13250851-13254255_20140818
180.485	1.16769	0.00250066	0.0375828	MSTRG.86695.7	1160	shikimate kinase 1, chloroplastic-like	Medtr6g033510.2_shikimate_kinase_HC_chr6:10838651-10833939_20140818
1289.84	1.16764	3.31e-06	0.000287165	MSTRG.65951.1	868	zinc ion-binding protein	Medtr7g445390.1_zinc_ion-binding_protein_HC_chr7:15335152-15333963_20140818
84.3162	1.16755	0.00341319	0.0463719	158385_t	2946	disease resistance protein (TIR-NBS-LRR class)	Medtr0012s0290.1_disease_resistance_protein_(TIR-NBS-LRR_class),_putative_LC_scaffold0012:214659-202913_20140818
2298.93	1.1675	2.47e-06	0.0002283	MSTRG.37596.29	2403	subtilisin-like serine protease	Medtr7g081500.1_subtilisin-like_serine_protease_HC_chr7:31114135-31106020_20140818
44.8978	1.16705	0.000597564	0.0139843	MSTRG.59087.1	728	---NA---	---NA---
351.997	1.16686	0.000572015	0.0135625	46464_t	5028	frigida-LIKE protein	Medtr2g091250.1_frigida-LIKE_protein_LC_chr2:39392129-39385795_20140818
456.164	1.16652	0.00157329	0.0274819	MSTRG.6299.1	1121	basic endochitinase-like	Medtr6g023340.1_chitinase_HC_chr6:8138738-8139938_20140818
732.675	1.16583	1.38e-05	0.000868253	MSTRG.14402.4	5668	anaphase-promoting complex subunit 1	Medtr5g082890.1_anaphase-promoting_complex_subunit_1_HC_chr5:35723483-35692350_20140818
178.966	1.16557	6.86e-05	0.00292822	MSTRG.69867.6	1585	putative sodium-coupled neutral amino acid transporter 10	Medtr5g083760.1_transmembrane_amino_acid_transporter_family_protein_HC_chr5:36131798-36134727_20140818
204.616	1.16554	4.74e-06	0.000377201	MSTRG.22721.2	5052	LRR and NB-ARC domain disease resistance protein	Medtr3g023030.1_LRR_and_NB-ARC_domain_disease_resistance_protein_LC_chr3:6950546-6944739_20140818
80.6847	1.16544	0.00379648	0.0497846	114881_t	3354	NB-ARC domain disease resistance protein	Medtr3g466620.1_NB-ARC_domain_disease_resistance_protein_LC_chr3:27403732-27400482_20140818
408.655	1.16533	4.42e-05	0.00210943	MSTRG.35438.4	1869	GEM-like protein 4	Medtr1g114640.1_GRAM_domain_protein/ABA-responsive-like_protein_HC_chr1:51754431-51753109_20140818
98.6042	1.16411	0.000510022	0.0124944	MSTRG.58406.10	1302	F-box protein interaction domain protein	Medtr8g102520.1_F-box_protein_interaction_domain_protein_LC_chr8:43165572-43164459_20140818
135.268	1.16406	3.2e-05	0.00166212	MSTRG.72118.16	1640	glycosyltransferase family 90 protein	Medtr8g031470.1_glycosyltransferase_family_90_protein_HC_chr8:11807748-11811706_20140818
710.486	1.16329	7.17e-05	0.00301919	87748_t	1713	putative nucleoredoxin 1-like protein	Medtr8g064810.1_protein_disulfide_isomerase_(PDI)-like_protein_HC_chr8:27194182-27196762_20140818
1740.62	1.16291	5.7e-05	0.00255285	MSTRG.64982.8	544	non-symbiotic hemoglobin 1	Medtr4g068860.1_Non-symbiotic_hemoglobin_HC_chr4:25846162-25844617_20140818
63.913	1.16258	0.000864317	0.0182031	134908_t	357	PAS domain tyrosine kinase family protein	Medtr2g034020.1_PAS_domain_tyrosine_kinase_family_protein_HC_chr2:12981641-12974612_20140818
71.2002	1.1624	0.000975075	0.0198086	MSTRG.372.3	868	COBRA-like protein 2 precursor	Medtr6g015865.1_COBRA-like_protein_2_precursor_HC_chr6:5541281-5538764_20140818
142.206	1.16186	0.00262017	0.0388033	MSTRG.41854.8	556	---NA---	---NA---
2695.99	1.16184	8.03e-05	0.003281	MSTRG.61766.8	1174	transmembrane protein, putative	Medtr8g066860.1_transmembrane_protein,_putative_LC_chr8:27838280-27839611_20140818
67.6774	1.16183	1.11e-05	0.000732922	153404_t	5541	TMV resistance protein N-like	Medtr8g075440.1_disease_resistance_protein_(TIR-NBS-LRR_class)_HC_chr8:31903618-31908853_20140818
319.047	1.16136	4.67e-06	0.000372633	92353_t	552	unknown	Medtr0206s0010.1_hypothetical_protein_HC_scaffold0206:13441-16198_20140818
216.702	1.15982	0.000125594	0.00456851	MSTRG.75154.1	2121	casein kinase I-like isoform X1	Medtr1g004990.1_casein_kinase_HC_chr1:35910-40554_20140818
138.377	1.15853	1.43e-05	0.000896879	MSTRG.82729.1	210	---NA---	---NA---
2587.69	1.15847	6.8e-05	0.00290895	MSTRG.61766.9	781	---NA---	Medtr8g066860.1_transmembrane_protein,_putative_LC_chr8:27838280-27839611_20140818
269.789	1.15809	7.02e-10	2.83e-07	MSTRG.44166.1	1264	PHD finger protein ING2	Medtr7g085450.1_PHD_finger-like_protein_HC_chr7:33106030-33108687_20140818
219.769	1.15802	0.000102692	0.00393988	MSTRG.38300.7	3671	superkiller-like protein	Medtr5g004660.1_superkiller-like_protein_HC_chr5:57937-73020_20140818
331.534	1.15793	7.32e-07	8.83e-05	193778_t	942	WRKY family transcription factor	Medtr3g106060.1_WRKY_family_transcription_factor_HC_chr3:48926808-48922741_20140818
1946.24	1.15758	1.56e-07	2.55e-05	46101_t	570	RNA-binding (RRM/RBD/RNP motif) family protein	Medtr4g070140.1_RNA-binding_(RRM/RBD/RNP_motif)_family_protein_LC_chr4:26401562-26402849_20140818
292.331	1.15757	1.83e-06	0.000182047	MSTRG.17648.1	909	glycoside hydrolase family 1 protein	Medtr6g078330.3_glycoside_hydrolase_family_1_protein_HC_chr6:29404322-29408792_20140818
262.489	1.15746	1.08e-05	0.000718713	193689_t	498	universal stress protein A-like protein	Medtr1g083950.1_universal_stress_family_protein_HC_chr1:37410238-37411974_20140818
44.7326	1.15743	0.00276779	0.0402772	MSTRG.88845.2	1570	myb-like DNA-binding domain protein	Medtr4g067250.1_hypothetical_protein_HC_chr4:25376733-25381638_20140818
260.925	1.15731	0.000477033	0.0119449	MSTRG.81523.4	250	---NA---	---NA---
610.284	1.1565	0.00185256	0.0306896	MSTRG.84641.2	281	---NA---	---NA---
70.514	1.15616	0.000291888	0.00840988	MSTRG.44572.3	240	---NA---	---NA---
289.983	1.15489	0.00140986	0.0254744	MSTRG.13365.4	1530	replication factor-A carboxy-terminal domain protein	Medtr1g105785.1_replication_factor-A_carboxy-terminal_domain_protein_HC_chr1:47732917-47735741_20140818
103.028	1.15452	0.000213869	0.00672206	MSTRG.46388.5	2612	NB-ARC domain disease resistance protein	Medtr8g011550.1_NB-ARC_domain_disease_resistance_protein_LC_chr8:3142903-3139894_20140818
198.321	1.15429	0.000145176	0.00507353	MSTRG.75154.6	1988	casein kinase I-like isoform X1	Medtr1g004990.1_casein_kinase_HC_chr1:35910-40554_20140818
103.098	1.15414	0.0028289	0.0409244	MSTRG.30159.1	340	---NA---	---NA---
607.679	1.15405	0.000118488	0.00436745	MSTRG.88657.4	643	unknown	unknown
158.331	1.15401	0.000400275	0.0105822	MSTRG.15789.6	1869	papain family cysteine protease	Medtr3g082370.1_papain_family_cysteine_protease_LC_chr3:37174517-37176618_20140818
2681.64	1.15193	0.000107542	0.00407334	MSTRG.61766.4	1283	transmembrane protein, putative	Medtr8g066860.1_transmembrane_protein,_putative_LC_chr8:27838280-27839611_20140818
216.127	1.15171	2.55e-05	0.0013925	MSTRG.71336.1	250	---NA---	---NA---
101.81	1.1516	0.00167263	0.028688	MSTRG.854.1	1236	hypothetical protein MTR_0232s0030	Medtr0232s0030.1_hypothetical_protein_HC_scaffold0232:12112-14908_20140818
294.522	1.15142	0.000481486	0.0120233	MSTRG.64122.3	314	thioredoxin-like protein Clot	Medtr3g027090.1_thioredoxin-like_protein_HC_chr3:8382516-8384675_20140818
547.23	1.15135	2.3e-05	0.0012795	MSTRG.14402.1	6012	anaphase-promoting complex subunit 1	Medtr5g082890.1_anaphase-promoting_complex_subunit_1_HC_chr5:35723483-35692350_20140818
165.353	1.1512	0.00315261	0.0439889	MSTRG.31355.2	517	sphingolipid transporter spinster-like protein, putative	Medtr2g010350.1_sphingolipid_transporter_spinster-like_protein,_putative_HC_chr2:2335984-2341334_20140818
211.532	1.15092	0.00128973	0.0239319	MSTRG.86067.12	1230	DnaJ-class molecular chaperone	Medtr2g087660.1_DnaJ-class_molecular_chaperone_HC_chr2:36877846-36880571_20140818
248.716	1.1507	1.43e-05	0.000895517	MSTRG.37365.2	2375	Putative ribonuclease H protein At1g65750 family	Medtr5g044650.1_hypothetical_protein_LC_chr5:19594568-19593859_20140818
67.5993	1.15052	1.24e-05	0.000798023	MSTRG.6290.1	1026	PREDICTED: uncharacterized protein LOC101512620	Medtr5g005640.1_hypothetical_protein_LC_chr5:557041-556669_20140818
[truncated: 2,485 more rows]

## Sheet: Tables S4.2.  Unique
Supporting information Table S4.2. Inter-cultivar differences (cv. MNGRN-16 vs. cv. Baker) in constitutive transcript expression under control conditions. Genes uniquely expressed in cv. MNGRN-16 and cv. Baker, respectively.
baseMean	log2 Fold Change	pvalue	padj	ID (this study)	Sequence Length	Sequence Description NCBI	Sequence description & ID, Medicago truncatula
Unique genes expressed in cv. MNGRN-16
301.133	12.6504	4.19e-12	3.43e-09	MSTRG.79428.1	522	transmembrane protein, putative	Medtr3g010283.1_transmembrane_protein,_putative_LC_chr3:2395543-2393930_20140818
364.885	11.6858	2.61e-09	8.82e-07	190268_t	2035	hypothetical protein CDL15_Pgr020624	Medtr0052s0130.1_senescence-associated_protein_HC_scaffold0052:58473-60984_20140818
304.157	11.353	8.39e-23	7.64e-19	MSTRG.2867.2	580	---NA---	---NA---
148.224	11.2877	2.47e-10	1.2e-07	MSTRG.328.3	1384	plant phospholipase-like protein	Medtr8g089530.1_plant_phospholipase-like_protein_HC_chr8:37213549-37211375_20140818
174.168	11.1135	6.99e-21	5.15e-17	MSTRG.34803.2	412	---NA---	---NA---
91.5482	10.8019	1.87e-08	4.4e-06	MSTRG.37821.1	225	---NA---	---NA---
1956.13	10.5868	1.34e-08	3.34e-06	MSTRG.59767.2	1211	elongation factor 1-alpha	Medtr1g101870.1_elongation_factor_1-alpha_LC_chr1:45981685-45990868_20140818
1919.88	10.5636	1.52e-08	3.71e-06	135388_t	1350	elongation factor 1-alpha	Medtr8g013910.1_elongation_factor_1-alpha_HC_chr8:4298149-4296399_20140818
86.1907	10.4868	1.1e-08	2.87e-06	59062_t	1245	plant phospholipase-like protein	Medtr8g089530.1_plant_phospholipase-like_protein_HC_chr8:37213549-37211375_20140818
71.3157	10.4718	3.64e-07	5.03e-05	8251_t	4578	Ty3/gypsy retrotransposon protein	Medtr7g029555.1_hypothetical_protein_LC_chr7:10634063-10633011_20140818
50.0471	10.3491	5.16e-05	0.00236291	76102_t	1677	ribonuclease H	Medtr1g054775.1_endonuclease/exonuclease/phosphatase_family_protein_LC_chr1:23942081-23949866_20140818
65.8431	10.3051	1.37e-05	0.00086533	25459_t	5706	ribonuclease H	Medtr7g111367.1_reverse_transcriptase,_putative_LC_chr7:45714609-45713248_20140818
88.6267	10.2132	3.14e-16	8.53e-13	132883_t	756	subtilisin-like protease SBT4.14 isoform X2	Medtr5g081100.1_subtilisin-like_serine_endopeptidase_family_protein_LC_chr5:34713145-34710741_20140818
148.231	10.1624	4.11e-09	1.29e-06	MSTRG.328.2	1688	plant phospholipase-like protein	Medtr8g089530.1_plant_phospholipase-like_protein_HC_chr8:37213549-37211375_20140818
53.3718	9.95529	6.47e-23	6.26e-19	MSTRG.82072.1	1430	replication factor-A carboxy-terminal domain protein	Medtr2g450060.1_replication_factor-A_carboxy-terminal_domain_protein_LC_chr2:22081675-22078797_20140818
43.7575	9.81251	1.84e-17	7.14e-14	MSTRG.5125.2	1564	ribonuclease H	Medtr3g108670.1_transmembrane_protein,_putative_HC_chr3:50193540-50192034_20140818
36.3107	9.80574	3.26e-09	1.05e-06	MSTRG.66529.2	1681	Retrovirus-related Pol polyprotein from transposon 17.6	Medtr0057s0180.1_hypothetical_protein_LC_scaffold0057:68212-69206_20140818
34.8817	9.4834	1.16e-09	4.39e-07	MSTRG.74049.1	2257	---NA---	---NA---
39.9593	9.4769	9.4e-18	3.85e-14	MSTRG.84191.1	743	mechanosensitive ion channel protein 1, mitochondrial-like	Medtr8g028760.1_mechanosensitive_ion_channel_protein_MscS_HC_chr8:11086924-11081197_20140818
55.5307	9.3701	3.16e-12	2.66e-09	MSTRG.25180.4	369	NYN domain protein	Medtr3g050240.1_NYN_domain_protein_LC_chr3:19796298-19799980_20140818
28.7586	9.28192	5.61e-10	2.36e-07	MSTRG.3412.3	1504	transcriptional adapter ADA2a	Medtr2g026380.1_transcriptional_adapter_ADA2_HC_chr2:9521699-9525767_20140818
35.9152	9.2793	1.94e-19	1.11e-15	MSTRG.39534.1	4063	Retrovirus-related Pol polyprotein from transposon TNT 1-94	Medtr3g093120.1_SPFH_domain/band_7_family_protein_LC_chr3:42570339-42574091_20140818
36.1278	9.27196	1.29e-15	2.78e-12	MSTRG.61739.2	225	---NA---	---NA---
29.8638	9.13855	2.76e-14	4.03e-11	141650_t	1020	nonsense-mediated mRNA decay protein	Medtr5g006990.1_nonsense-mediated_mRNA_decay_protein_LC_chr5:1164722-1162932_20140818
30.5955	9.11056	4.17e-19	2.31e-15	58339_t	3969	Retrovirus-related Pol polyprotein from transposon TNT 1-94	Medtr3g093120.1_SPFH_domain/band_7_family_protein_LC_chr3:42570339-42574091_20140818
29.1273	9.07941	1.77e-09	6.33e-07	MSTRG.20745.1	950	digestive organ expansion factor-like protein	Medtr3g083080.1_hypothetical_protein_LC_chr3:37492599-37493407_20140818
21.8918	9.04135	7.01e-05	0.00297556	151779_t	5484	ribonuclease H	Medtr0111s0070.1_endonuclease/exonuclease/phosphatase_family_protein_LC_scaffold0111:46255-44060_20140818
93.3666	9.03242	7.41e-08	1.38e-05	1396_t	1863	DUF4283 domain protein	Medtr4g096760.1_DUF4283_domain_protein_LC_chr4:38501881-38500295_20140818
41.1934	9.02977	4.92e-18	2.18e-14	MSTRG.13428.1	535	---NA---	---NA---
37.7517	8.94373	4.44e-17	1.46e-13	MSTRG.24927.1	1422	replication factor-A carboxy-terminal domain protein	Medtr4g085760.1_replication_factor-A_carboxy-terminal_domain_protein_LC_chr4:33538359-33540924_20140818
23.9033	8.93424	0.000791969	0.0170787	MSTRG.43359.1	1596	DUF1680 domain protein	Medtr4g065220.1_DUF1680_domain_protein_HC_chr4:24718873-24724422_20140818
31.6555	8.89224	7.17e-15	1.21e-11	61355_t	5145	ribonuclease H	Medtr1g026690.1_hypothetical_protein_LC_chr1:8719475-8720704_20140818
37.3752	8.88088	3.16e-17	1.11e-13	MSTRG.2653.1	541	---NA---	---NA---
34.1148	8.84906	2.7e-16	7.74e-13	MSTRG.30461.1	505	---NA---	---NA---
22.1914	8.84253	1.9e-13	2.27e-10	MSTRG.48670.1	332	hypothetical protein MTR_7g029555	Medtr7g029555.1_hypothetical_protein_LC_chr7:10634063-10633011_20140818
24.0918	8.83943	8.03e-16	1.86e-12	MSTRG.61739.3	391	hypothetical protein MTR_3g011355	Medtr3g011355.1_hypothetical_protein_HC_chr3:2786994-2787500_20140818
20.3517	8.81887	0.000198911	0.00637873	8170_t	5232	ribonuclease H	Medtr4g020630.1_endonuclease/exonuclease/phosphatase_family_protein_LC_chr4:6612911-6615807_20140818
25.6319	8.80672	0.000283889	0.00824164	MSTRG.16940.1	955	hypothetical protein MTR_4g063625	Medtr4g063625.1_hypothetical_protein_LC_chr4:23542256-23542934_20140818
26.3709	8.75247	1.02e-15	2.25e-12	MSTRG.82071.1	465	plant OB fold protein, putative	Medtr4g070160.1_plant_OB_fold_protein,_putative_LC_chr4:26409757-26410855_20140818
22.996	8.73511	1.11e-15	2.42e-12	57194_t	4023	Retrovirus-related Pol polyprotein from transposon TNT 1-94	Medtr6g472230.1_disease_resistance_protein_(TIR-NBS-LRR_class),_putative_LC_chr6:26054240-26059623_20140818
20.304	8.65164	1.04e-05	0.000693114	2541_t	663	GDSL-like lipase/acylhydrolase	Medtr7g068500.1_GDSL-like_lipase/acylhydrolase_HC_chr7:25086334-25083910_20140818
31.6193	8.61593	1.45e-14	2.25e-11	MSTRG.56356.3	210	---NA---	Medtr5g068680.1_transmembrane_protein,_putative_LC_chr5:29087094-29087516_20140818
65.9942	8.54987	7.28e-10	2.91e-07	MSTRG.80551.1	257	---NA---	---NA---
332.906	8.52057	3.03e-16	8.39e-13	MSTRG.72718.2	844	---NA---	---NA---
30.7318	7.96564	3.72e-14	5.28e-11	37709_t	1938	white-brown-complex ABC transporter family protein	Medtr4g094060.1_white-brown-complex_ABC_transporter_family_protein_HC_chr4:37315181-37324184_20140818
64.5534	7.84329	0.000314925	0.00889332	132948_t	522	flavin containing monooxygenase YUCCA8-like protein	Medtr7g099160.1_flavin_containing_monooxygenase_YUCCA8-like_protein_HC_chr7:39738895-39732134_20140818
92.4443	7.64562	5.29e-09	1.58e-06	MSTRG.44880.7	1434	replication factor-A carboxy-terminal domain protein	Medtr5g053590.1_DUF223_domain_protein_LC_chr5:22080013-22077419_20140818
34.0157	7.63238	7.89e-11	4.48e-08	MSTRG.23788.2	1842	F-box/LRR-repeat protein 15-like	Medtr1g015450.1_F-box-like_protein_HC_chr1:3862292-3870164_20140818
369.116	7.63013	1.41e-09	5.19e-07	MSTRG.39271.3	1260	NYN domain protein	Medtr3g050240.1_NYN_domain_protein_LC_chr3:19796298-19799980_20140818
23.7915	7.61837	2.04e-12	1.81e-09	MSTRG.28157.1	1743	DUF4283 domain protein	Medtr7g445700.1_DUF4283_domain_protein_LC_chr7:15486160-15484152_20140818
82.2343	7.46982	2.4e-08	5.45e-06	MSTRG.65609.2	1396	replication factor-A carboxy-terminal domain protein	Medtr5g053590.1_DUF223_domain_protein_LC_chr5:22080013-22077419_20140818
42.9284	7.43927	5.02e-07	6.54e-05	MSTRG.64101.3	3537	NBS-LRR type disease resistance protein	Medtr2g038760.1_NBS-LRR_type_disease_resistance_protein_LC_chr2:16974548-16978812_20140818
80.7596	7.43786	2.36e-07	3.56e-05	MSTRG.65609.1	1484	replication factor-A carboxy-terminal domain protein	Medtr5g053590.1_DUF223_domain_protein_LC_chr5:22080013-22077419_20140818
79.4675	7.40563	3.15e-07	4.48e-05	MSTRG.42396.2	1396	replication factor-A carboxy-terminal domain protein	Medtr5g053590.1_DUF223_domain_protein_LC_chr5:22080013-22077419_20140818
36.6414	7.3601	4.03e-16	1.04e-12	35894_t	3702	retrotransposon-related protein	Medtr3g093120.1_SPFH_domain/band_7_family_protein_LC_chr3:42570339-42574091_20140818
76.4975	7.34902	4.14e-07	5.58e-05	MSTRG.42396.1	1484	replication factor-A carboxy-terminal domain protein	Medtr5g053590.1_DUF223_domain_protein_LC_chr5:22080013-22077419_20140818
154.274	7.21806	1.17e-08	3e-06	MSTRG.26702.2	1868	PREDICTED: uncharacterized protein LOC100790056	Medtr1g023240.1_hypothetical_protein_LC_chr1:7432015-7429412_20140818
99.0792	7.04808	3.16e-09	1.03e-06	105230_t	1500	PREDICTED: uncharacterized protein LOC100790056	Medtr1g023240.1_hypothetical_protein_LC_chr1:7432015-7429412_20140818
56.6932	6.85895	7.36e-08	1.37e-05	MSTRG.60434.3	265	---NA---	---NA---
134.413	6.79326	9.07e-08	1.65e-05	MSTRG.25180.5	1185	NYN domain protein	Medtr3g050240.1_NYN_domain_protein_LC_chr3:19796298-19799980_20140818
111.118	6.73964	0.000460704	0.0116585	MSTRG.17624.2	1336	glycoside hydrolase family 81 protein	Medtr6g037090.1_glycoside_hydrolase_family_81_protein_HC_chr6:13033453-13035983_20140818
83.2854	6.70455	5.18e-13	5.73e-10	MSTRG.81125.8	2250	disease resistance protein	Medtr8g059275.1_Rpp4C4,_putative_LC_chr8:20782997-20765328_20140818
139.491	6.63405	7.92e-08	1.47e-05	MSTRG.34987.2	585	NYN domain protein	Medtr3g050240.1_NYN_domain_protein_LC_chr3:19796298-19799980_20140818
38.8777	6.62538	1.12e-07	1.95e-05	MSTRG.8252.1	2632	NB-ARC domain disease resistance protein	Medtr5g070960.1_disease_resistance_protein_RGA4_HC_chr5:30062044-30058913_20140818
21.3278	6.59259	0.00366802	0.0486205	MSTRG.24870.1	1110	transmembrane protein, putative	Medtr6g061240.1_transmembrane_protein,_putative_LC_chr6:21266000-21266248_20140818
38.0631	6.4461	1.6e-12	1.49e-09	MSTRG.40610.2	1435	ABC transporter-like family-protein	Medtr6g034265.1_ABC_transporter_family_protein_HC_chr6:11661535-11667511_20140818
155.211	6.43137	8.49e-07	9.99e-05	MSTRG.31531.2	2426	transmembrane protein, putative	Medtr3g076720.1_transmembrane_protein,_putative_LC_chr3:34479302-34476397_20140818
3256.15	6.32818	8.31e-05	0.00336173	MSTRG.74865.2	919	---NA---	Medtr5g039960.1_transmembrane_protein,_putative_LC_chr5:17590405-17589548_20140818
91.932	6.31776	1.44e-06	0.000149997	MSTRG.31531.3	1236	transmembrane protein, putative	Medtr3g076720.1_transmembrane_protein,_putative_LC_chr3:34479302-34476397_20140818
3643.87	6.29542	9.06e-05	0.00358176	MSTRG.74865.1	1494	---NA---	Medtr5g039960.1_transmembrane_protein,_putative_LC_chr5:17590405-17589548_20140818
52.9008	6.19792	2.77e-07	4.04e-05	MSTRG.60604.2	839	---NA---	---NA---
36.5092	6.1714	6.3e-05	0.00275048	MSTRG.50759.2	1119	transmembrane protein, putative	Medtr6g016315.1_transmembrane_protein,_putative_LC_chr6:5998442-5999043_20140818
24.3225	6.08981	1.92e-11	1.32e-08	MSTRG.38584.1	2097	PREDICTED: uncharacterized protein LOC100790056	Medtr3g058800.1_hypothetical_protein_HC_chr3:23449767-23450474_20140818
50.6956	5.97257	0.000445518	0.0113895	MSTRG.75236.1	512	transmembrane protein, putative	Medtr5g080330.1_aspartic_protease_family_protein,_putative_LC_chr5:34380900-34377963_20140818
39.6536	5.79475	7.39e-06	0.000532181	MSTRG.8252.2	3137	NB-ARC domain disease resistance protein	Medtr5g070960.1_disease_resistance_protein_RGA4_HC_chr5:30062044-30058913_20140818
58.9579	5.43358	2.3e-05	0.00127962	MSTRG.60422.2	839	---NA---	---NA---
66.7009	5.41583	1.15e-05	0.000751784	MSTRG.72296.2	591	transmembrane protein, putative	Medtr0200s0020.1_hypothetical_protein_LC_scaffold0200:18198-19518_20140818
135.25	5.41448	0.000143905	0.00504161	MSTRG.60434.1	311	---NA---	---NA---
22.9899	5.41359	0.000111062	0.0041772	83604_t	3387	PREDICTED: uncharacterized protein LOC100790056	Medtr8g057120.1_hypothetical_protein_LC_chr8:18801883-18803131_20140818
44.7511	5.35249	0.000105187	0.00400782	MSTRG.74321.4	1414	PREDICTED: uncharacterized protein LOC105853135	Medtr4g026570.1_hypothetical_protein_LC_chr4:9142766-9142245_20140818
77.4453	5.28474	3.41e-05	0.00174918	MSTRG.89454.1	289	---NA---	Medtr5g039960.1_transmembrane_protein,_putative_LC_chr5:17590405-17589548_20140818
30.6041	5.19764	0.000163494	0.00554484	106228_t	3081	PREDICTED: uncharacterized protein LOC100790056	Medtr8g057120.1_hypothetical_protein_LC_chr8:18801883-18803131_20140818
42.9574	4.98846	0.000539654	0.0129901	MSTRG.71524.1	1313	PREDICTED: uncharacterized protein LOC105853135	Medtr4g026570.1_hypothetical_protein_LC_chr4:9142766-9142245_20140818
42.2888	4.92609	0.000615702	0.0142986	MSTRG.74321.3	1305	PREDICTED: uncharacterized protein LOC105853135	Medtr4g026570.1_hypothetical_protein_LC_chr4:9142766-9142245_20140818
37.7615	4.92533	1.3e-11	9.25e-09	MSTRG.3948.1	2139	disease resistance protein (TIR-NBS-LRR class)	Medtr4g015030.1_disease_resistance_protein_(TIR-NBS-LRR_class)_HC_chr4:4332186-4338889_20140818
39.1598	4.91567	5.41e-05	0.00245502	88055_t	3009	NB-ARC domain disease resistance protein	Medtr5g070960.1_disease_resistance_protein_RGA4_HC_chr5:30062044-30058913_20140818
42.1392	4.84506	0.000815683	0.0174036	MSTRG.25388.1	1243	PREDICTED: uncharacterized protein LOC105853135	Medtr4g026570.1_hypothetical_protein_LC_chr4:9142766-9142245_20140818
24.7711	4.7873	2.5e-06	0.000230779	34849_t	645	telomere recombination domain protein	Medtr5g048020.1_hypothetical_protein_LC_chr5:21017280-21016626_20140818
153.851	4.7601	0.0013875	0.0251733	MSTRG.60434.2	320	---NA---	---NA---
50.7412	4.63453	5.51e-05	0.00249053	MSTRG.70898.1	492	glycoside hydrolase family 14 protein	Medtr1g103390.1_hypothetical_protein_LC_chr1:46802777-46802077_20140818
63.806	4.61768	0.00128406	0.0238577	MSTRG.42920.3	1188	disease resistance protein (TIR-NBS-LRR class)	Medtr1g060030.1_NB-ARC_domain_protein_LC_chr1:26136298-26139749_20140818
36.9932	4.46122	3.01e-08	6.47e-06	MSTRG.47629.1	282	---NA---	---NA---
28.5249	4.34199	0.00089865	0.0187186	MSTRG.22569.1	563	B3 DNA-binding domain protein	Medtr6g477950.1_B3_DNA-binding_domain_protein_LC_chr6:28716058-28720043_20140818
52.2842	4.23576	0.00255015	0.0381122	MSTRG.28232.1	1037	proline synthetase associated protein	Medtr3g053230.1_proline_synthetase_associated_protein_HC_chr3:21149543-21142887_20140818
37.2607	4.18079	0.000428655	0.0111013	90669_t	2397	ATP-dependent DNA helicase PIF1	Medtr2g008500.1_AT_hook_motif_protein,_putative_LC_chr2:1509883-1511103_20140818
32.6786	4.16893	6.69e-06	0.000491736	MSTRG.79228.1	2161	pentatricopeptide repeat-containing protein At3g02650, mitochondrial	Medtr3g081310.1_PPR_containing_plant_protein_HC_chr3:36828718-36830894_20140818
25.7854	4.1055	1.04e-05	0.000694681	MSTRG.39681.1	2483	zinc finger BED domain-containing protein RICESLEEPER 2-like	Medtr3g090080.1_hypothetical_protein_HC_chr3:40940498-40940286_20140818
45.853	4.05047	1.38e-07	2.31e-05	52005_t	3051	ATP-dependent DNA helicase PIF1	Medtr7g026957.1_hypothetical_protein_LC_chr7:8994652-8999133_20140818
86.9846	3.95937	0.00194918	0.0317362	191758_t	3051	LRR and NB-ARC domain disease resistance protein	Medtr7g018850.1_LRR_and_NB-ARC_domain_disease_resistance_protein_LC_chr7:6251896-6245587_20140818
Unique genes expressed in cv. Baker
228.784	11.2214	3.85e-10	1.71e-07	147637_t	702	---NA---	---NA---
244.138	10.9511	3.08e-17	1.11e-13	90444_t	5601	hypothetical protein L195_g009111	Medtr3g451840.1_Pol-like_polyprotein/retrotransposon,_putative_LC_chr3:18857640-18856786_20140818
236.038	10.9347	5.73e-17	1.81e-13	MSTRG.44284.2	5052	hypothetical protein L195_g009111	Medtr3g451840.1_Pol-like_polyprotein/retrotransposon,_putative_LC_chr3:18857640-18856786_20140818
123.525	10.1383	7.08e-26	9.14e-22	MSTRG.30739.7	608	importin subunit alpha-2	Medtr2g034900.1_importin_subunit_alpha-1b_HC_chr2:13400262-13404524_20140818
142.365	10.028	1.14e-14	1.81e-11	MSTRG.85969.1	1877	hypothetical protein L195_g001325	Medtr0002s0930.1_hypothetical_protein_LC_scaffold0002:354058-353150_20140818
269.835	9.94221	6.07e-16	1.51e-12	MSTRG.24335.1	5664	hypothetical protein L195_g009111	Medtr3g012210.1_hypothetical_protein_LC_chr3:3288810-3287019_20140818
267.659	9.92051	7.67e-16	1.83e-12	174175_t	5637	hypothetical protein L195_g009111	Medtr3g012210.1_hypothetical_protein_LC_chr3:3288810-3287019_20140818
118.447	9.87471	6.93e-13	7.4e-10	42431_t	5637	hypothetical protein L195_g009111	Medtr3g012210.1_hypothetical_protein_LC_chr3:3288810-3287019_20140818
48.8944	9.51642	1.2e-19	7.13e-16	MSTRG.36511.2	1344	replication factor-A carboxy-terminal domain protein	Medtr1g052715.1_DUF223_domain_protein_LC_chr1:21677037-21675057_20140818
85.657	9.39801	8.97e-14	1.15e-10	9072_t	5538	hypothetical protein L195_g009111	Medtr3g451840.1_Pol-like_polyprotein/retrotransposon,_putative_LC_chr3:18857640-18856786_20140818
41.0235	9.21377	9.15e-09	2.48e-06	MSTRG.86826.1	623	---NA---	---NA---
99.8811	9.1953	1.1e-12	1.07e-09	MSTRG.62558.2	1057	transmembrane protein, putative	Medtr4g059020.1_hypothetical_protein_LC_chr4:21781510-21780682_20140818
63.6521	9.16385	2.65e-07	3.92e-05	MSTRG.8219.2	421	hypothetical protein MTR_4g059020	Medtr4g059020.1_hypothetical_protein_LC_chr4:21781510-21780682_20140818
62.8419	9.07316	0.000662619	0.015074	MSTRG.29802.3	726	hypothetical protein MTR_0961s0010	Medtr0961s0010.1_hypothetical_protein_HC_scaffold0961:1410-2203_20140818
49.2141	8.90612	0.000602491	0.0140656	MSTRG.33794.1	990	---NA---	---NA---
34.7911	8.84458	1.59e-16	4.66e-13	26877_t	2223	hypothetical protein MTR_6g039060	Medtr6g039060.1_hypothetical_protein_LC_chr6:14066150-14067799_20140818
30.3509	8.8154	2.39e-05	0.00131998	152210_t	1689	replication factor-A carboxy-terminal domain protein	Medtr2g450060.1_replication_factor-A_carboxy-terminal_domain_protein_LC_chr2:22081675-22078797_20140818
60.6356	8.68922	4.74e-12	3.84e-09	MSTRG.84427.1	1635	DNA replication factor CDT1-like protein	Medtr6g078940.1_hypothetical_protein_HC_chr6:29702981-29702181_20140818
24.7458	8.66505	1.83e-05	0.0010842	MSTRG.22209.2	1299	resistance protein	Medtr6g478080.1_disease_resistance_protein_(TIR-NBS-LRR_class)_LC_chr6:28899364-28906820_20140818
36.5204	8.64071	2.4e-07	3.61e-05	MSTRG.11862.1	911	hypothetical protein TSUD_125000	---NA---
88.5507	8.62091	0.000432728	0.0111625	MSTRG.32402.3	1028	---NA---	Medtr2g083950.1_transmembrane_protein,_putative_LC_chr2:35242657-35243825_20140818
49.3024	8.62045	6.25e-06	0.000464943	6721_t	4509	retrovirus-related Pol polyprotein from transposon TNT 1-94	Medtr3g093120.1_SPFH_domain/band_7_family_protein_LC_chr3:42570339-42574091_20140818
24.5268	8.50434	3.08e-15	6.19e-12	20951_t	1536	replication factor-A carboxy-terminal domain protein	Medtr1g052715.1_DUF223_domain_protein_LC_chr1:21677037-21675057_20140818
29.0368	8.49082	0.00123326	0.0231953	MSTRG.36392.1	1319	lipid phosphate phosphatase-like protein	Medtr5g005730.1_lipid_phosphate_phosphatase-like_protein_HC_chr5:592066-589373_20140818
102.052	8.46131	1.9e-05	0.00110843	MSTRG.6714.1	365	---NA---	---NA---
26.9652	8.41455	1.12e-10	6.15e-08	49506_t	6069	cysteine-rich receptor-like protein kinase	Medtr5g021380.1_endonuclease/exonuclease/phosphatase_family_protein_LC_chr5:8254181-8250703_20140818
30.2641	8.37034	6.3e-05	0.00275167	MSTRG.74412.1	1566	kinesin motor domain protein	Medtr4g132870.1_kinesin_motor_domain_protein_LC_chr4:55577102-55578973_20140818
50.1025	8.32549	4.49e-13	5.04e-10	MSTRG.84427.2	1241	hypothetical protein MTR_6g078940	Medtr6g078940.1_hypothetical_protein_HC_chr6:29702981-29702181_20140818
31.7637	8.23101	1.58e-07	2.57e-05	MSTRG.76316.2	297	pantothenate synthetase	Medtr3g070320.1_hypothetical_protein_LC_chr3:31524740-31525346_20140818
38.7448	8.21478	0.00176181	0.0296871	100650_t	693	AChain A, Crystal Structure Of A Plant Albumin From Cicer Arietinum Showing Hemagglutination	Medtr6g040290.1_albumin-2_protein_LC_chr6:14452313-14453014_20140818
22.1442	8.1991	0.000130982	0.00470248	153171_t	987	F-box protein interaction domain protein	Medtr1g054575.1_F-box_protein_interaction_domain_protein_LC_chr1:23681445-23684172_20140818
16.4108	8.12876	0.00240164	0.036628	MSTRG.88938.3	1223	RNA recognition motif	Medtr3g050860.1_acetyltransferase_(GNAT)_domain_protein_LC_chr3:20039441-20042747_20140818
48.2639	8.11812	9.83e-09	2.63e-06	MSTRG.18138.8	1629	helicase SKI2W	Medtr3g462290.1_RNA_helicase,_ATP-dependent,_SK12/DOB1_protein_HC_chr3:24871545-24853513_20140818
25.923	8.11621	3.09e-05	0.00161761	132213_t	3090	ribonuclease H	Medtr8g015630.1_hypothetical_protein_LC_chr8:5150097-5151869_20140818
39.3089	8.07769	3.98e-05	0.00195821	MSTRG.14052.2	212	---NA---	---NA---
27.4996	8.05921	3.38e-10	1.55e-07	MSTRG.35549.1	279	---NA---	---NA---
51.697	8.04154	0.000552527	0.0132403	MSTRG.32402.1	1933	cyclin-like F-box protein	Medtr3g082890.1_cyclin-like_F-box_protein_HC_chr3:37415980-37419629_20140818
32.5881	8.01956	0.00130507	0.0241183	MSTRG.55012.2	329	---NA---	---NA---
22.4178	7.98644	3.24e-06	0.000282659	MSTRG.66687.1	824	---NA---	---NA---
28.6412	7.9471	0.000274799	0.00803556	MSTRG.67024.1	897	transmembrane protein, putative	Medtr6g092420.1_transmembrane_protein,_putative_LC_chr6:34796849-34797417_20140818
42.3628	7.89791	1.34e-08	3.34e-06	MSTRG.18138.5	1658	RNA helicase, ATP-dependent, SK12/DOB1 protein	Medtr3g462290.1_RNA_helicase,_ATP-dependent,_SK12/DOB1_protein_HC_chr3:24871545-24853513_20140818
141.72	7.87525	0.00016702	0.00563245	MSTRG.30426.2	1168	ribosomal RNA small subunit methyltransferase G	Medtr4g106410.1_ribosomal_RNA_small_subunit_methyltransferase_G_HC_chr4:44136526-44142797_20140818
32.4042	7.85411	3.26e-05	0.00168694	MSTRG.71214.1	2789	ribonuclease H	Medtr8g015630.1_hypothetical_protein_LC_chr8:5150097-5151869_20140818
16.3873	7.84378	5.52e-05	0.00249053	165472_t	1089	F-box protein interaction domain protein	Medtr1g054575.1_F-box_protein_interaction_domain_protein_LC_chr1:23681445-23684172_20140818
14.2132	7.82722	3.46e-08	7.27e-06	158834_t	2421	subtilisin-like serine protease	Medtr4g103430.1_subtilisin-like_serine_protease_HC_chr4:42732284-42736930_20140818
124.224	7.82066	0.000637128	0.0146577	MSTRG.30426.3	1081	ribosomal RNA small subunit methyltransferase G	Medtr4g106410.1_ribosomal_RNA_small_subunit_methyltransferase_G_HC_chr4:44136526-44142797_20140818
15.2139	7.80488	1.74e-10	9.12e-08	MSTRG.43204.2	214	---NA---	---NA---
17.3772	7.80115	7.49e-09	2.12e-06	186125_t	6210	cysteine-rich receptor-like protein kinase	Medtr7g083690.1_endonuclease/exonuclease/phosphatase_family_protein_LC_chr7:32221247-32217435_20140818
207.53	7.79671	0.000586844	0.0138022	MSTRG.53222.2	1829	transmembrane protein, putative	Medtr0035s0070.1_hypothetical_protein_LC_scaffold0035:36362-37104_20140818
19.2706	7.75965	5.17e-12	4.13e-09	MSTRG.86458.2	779	protein CHROMATIN REMODELING 19	Medtr1g035330.1_ATP-dependent_helicase_family_protein_HC_chr1:12827792-12817494_20140818
27.1789	7.74591	2.28e-05	0.00127225	117503_t	3891	ribonuclease H	Medtr1g051330.1_endonuclease/exonuclease/phosphatase_family_protein_LC_chr1:20118817-20121550_20140818
21.9824	7.73643	7.56e-10	2.99e-07	4366_t	3249	Transposon Ty3-I Gag-Pol polyprotein	Medtr3g012210.1_hypothetical_protein_LC_chr3:3288810-3287019_20140818
16.384	7.72159	7.77e-05	0.00319989	MSTRG.75185.2	2053	cysteine desulfurase mitochondrial-like	Medtr7g106180.1_DUF4283_domain_protein_LC_chr7:43138905-43137885_20140818
25.4598	7.7098	0.000137631	0.00487314	MSTRG.84309.1	424	myb transcription factor	Medtr8g092810.1_myb_transcription_factor_LC_chr8:38813164-38819601_20140818
13.9512	7.68318	1.33e-09	4.94e-07	MSTRG.12221.1	1534	replication factor-A carboxy-terminal domain protein	Medtr6g464080.1_replication_factor-A_carboxy-terminal_domain_protein_LC_chr6:22311880-22315905_20140818
24.0985	7.66223	6.75e-10	2.73e-07	137201_t	6039	cysteine-rich receptor-like protein kinase	Medtr5g021380.1_endonuclease/exonuclease/phosphatase_family_protein_LC_chr5:8254181-8250703_20140818
18.4603	7.60707	1.4e-08	3.45e-06	MSTRG.42239.1	456	---NA---	---NA---
30.5442	7.6033	4.43e-10	1.92e-07	MSTRG.18138.6	1249	RNA helicase, ATP-dependent, SK12/DOB1 protein	Medtr3g462290.1_RNA_helicase,_ATP-dependent,_SK12/DOB1_protein_HC_chr3:24871545-24853513_20140818
14.1408	7.57065	0.00266573	0.0392339	131889_t	1914	hypothetical protein MTR_0202s0040	Medtr0202s0040.1_hypothetical_protein_LC_scaffold0202:11530-13270_20140818
10.263	7.53212	0.00325274	0.0449087	MSTRG.88938.4	1056	RNA recognition motif	Medtr3g050860.1_acetyltransferase_(GNAT)_domain_protein_LC_chr3:20039441-20042747_20140818
39.6626	7.53027	4.52e-11	2.69e-08	MSTRG.47056.4	2042	hypothetical protein L195_g037224, partial	---NA---
12.6255	7.47413	2.09e-08	4.8e-06	MSTRG.32415.2	508	---NA---	---NA---
10.4721	7.46517	0.0032356	0.0447391	101789_t	1863	heat shock 70 kDa protein	Medtr7g026170.1_heat_shock_70_kDa_protein_HC_chr7:8668656-8666356_20140818
20.6758	7.4457	0.00120485	0.0228859	MSTRG.5769.2	1744	disease resistance protein (TIR-NBS-LRR class)	Medtr6g075870.1_disease_resistance_protein_(TIR-NBS-LRR_class)_LC_chr6:28180946-28184059_20140818
78.0731	7.43999	5.08e-11	2.98e-08	MSTRG.47056.2	4696	hypothetical protein L195_g037224, partial	Medtr6g004070.1_sphingoid_long-chain_bases_kinase-like_protein_HC_chr6:102237-110525_20140818
11.111	7.42099	1.53e-08	3.72e-06	MSTRG.29915.1	477	---NA---	---NA---
19.393	7.35702	1.3e-12	1.26e-09	MSTRG.16184.1	1462	transmembrane protein, putative	Medtr6g004080.1_transmembrane_protein,_putative_HC_chr6:114233-112049_20140818
17.8717	7.32566	1.76e-08	4.2e-06	39999_t	453	transmembrane protein, putative	Medtr1g097530.1_transmembrane_protein,_putative_HC_chr1:43995355-43994390_20140818
17.8079	7.31795	1.81e-08	4.31e-06	138379_t	1557	NBS-containing resistance-like protein	Medtr1g097530.1_transmembrane_protein,_putative_HC_chr1:43995355-43994390_20140818
27.3174	7.30634	4.88e-09	1.47e-06	185139_t	498	transmembrane protein, putative	Medtr1g097530.1_transmembrane_protein,_putative_HC_chr1:43995355-43994390_20140818
31.4129	7.23659	1.3e-08	3.27e-06	94549_t	5709	Ty3/gypsy retrotransposon protein	Medtr8g094810.1_leguminosin_group486_secreted_peptide_HC_chr8:39604959-39608257_20140818
94.6619	7.19315	1.2e-11	8.63e-09	MSTRG.47056.1	3947	sphingoid long-chain bases kinase 1	Medtr6g004070.1_sphingoid_long-chain_bases_kinase-like_protein_HC_chr6:102237-110525_20140818
18.5336	7.14311	9.01e-05	0.00356996	186770_t	1170	DUF4283 domain protein	Medtr1g093780.1_DUF4283_domain_protein_LC_chr1:42082356-42080689_20140818
15.1753	7.14084	3.9e-08	8.01e-06	MSTRG.31362.2	636	50S ribosomal protein L16	Medtr0002s0140.1_50S_ribosomal_protein_L16_HC_scaffold0002:161646-164190_20140818
16.1833	7.08317	4.54e-11	2.69e-08	155553_t	1248	transmembrane protein, putative	Medtr6g004080.1_transmembrane_protein,_putative_HC_chr6:114233-112049_20140818
23.8429	7.08203	5.48e-10	2.31e-07	146909_t	630	transmembrane protein, putative	Medtr4g059020.1_hypothetical_protein_LC_chr4:21781510-21780682_20140818
66.6126	7.08135	3.17e-05	0.00165332	176528_t	357	albumin I	Medtr3g067430.1_albumin_I_LC_chr3:30050282-30049149_20140818
92.8793	7.02999	0.000555542	0.0132797	MSTRG.24850.1	758	---NA---	---NA---
82.5657	7.02244	2.45e-07	3.67e-05	MSTRG.6430.1	543	---NA---	---NA---
14.8304	7.01128	0.000195155	0.00629351	31194_t	900	HIT zinc finger protein	Medtr1g032200.2_HIT_zinc_finger_protein_HC_chr1:11415693-11419506_20140818
91.0947	7.00402	0.000702964	0.0157308	MSTRG.24850.2	837	---NA---	---NA---
14.7538	6.99077	0.00018486	0.00605986	31186_t	885	HIT zinc finger protein	Medtr1g032200.2_HIT_zinc_finger_protein_HC_chr1:11415693-11419506_20140818
97.4467	6.96861	3e-09	9.88e-07	120037_t	5574	hypothetical protein L195_g009111	Medtr3g451840.1_Pol-like_polyprotein/retrotransposon,_putative_LC_chr3:18857640-18856786_20140818
17.8377	6.93553	1.98e-09	6.94e-07	MSTRG.40678.2	1597	F-box/RNI/FBD-like domain protein	Medtr7g087840.1_F-box/FBD/LRR_protein_LC_chr7:34145858-34152025_20140818
46.5719	6.91722	3.74e-05	0.00187001	MSTRG.44285.1	926	---NA---	---NA---
24.6477	6.88395	2.86e-10	1.34e-07	MSTRG.86458.1	1057	protein CHROMATIN REMODELING 19	Medtr1g035330.1_ATP-dependent_helicase_family_protein_HC_chr1:12827792-12817494_20140818
18.1218	6.85426	0.00372903	0.049129	MSTRG.7461.1	1117	cystinosin homolog	Medtr6g022180.1_cystinosin-like_protein_HC_chr6:7717811-7722963_20140818
63.2413	6.81847	1.87e-10	9.57e-08	MSTRG.47056.5	3174	hypothetical protein L195_g037224, partial	---NA---
50.4823	6.74939	0.000638866	0.0146781	MSTRG.33211.1	571	---NA---	---NA---
43.0739	6.74709	0.000263445	0.00780371	MSTRG.44283.1	716	---NA---	---NA---
23.1532	6.70504	3.31e-10	1.53e-07	MSTRG.80500.24	522	ADP-ribosylation factor family protein	Medtr6g464080.1_replication_factor-A_carboxy-terminal_domain_protein_LC_chr6:22311880-22315905_20140818
55.9237	6.62763	1.61e-12	1.49e-09	70868_t	3936	hypothetical protein L195_g037224, partial	---NA---
35.9364	6.61932	8.6e-06	0.000599007	44931_t	567	pathogenesis-related protein bet V I family protein	Medtr8g045695.1_polyketide_cyclase/dehydrase_and_lipid_transporter_HC_chr8:17870704-17868478_20140818
18.5993	6.60659	2.62e-06	0.000239621	MSTRG.74209.9	1428	disease resistance protein (TIR-NBS-LRR class)	Medtr4g050910.1_NB-ARC_domain_protein_LC_chr4:18073549-18077036_20140818
40.8794	6.55423	4.63e-10	1.99e-07	16249_t	924	nuclear movement family protein	Medtr1g008170.1_nuclear_movement_family_protein_HC_chr1:772406-769625_20140818
48.0133	6.539	2.88e-12	2.46e-09	130123_t	4440	hypothetical protein TSUD_243380, partial	Medtr7g083690.1_endonuclease/exonuclease/phosphatase_family_protein_LC_chr7:32221247-32217435_20140818
23.6986	6.46036	8.93e-07	0.000103662	188474_t	1173	transmembrane protein, putative	Medtr4g019770.1_RHO_guanyl-nucleotide_exchange_factor_HC_chr4:6266234-6262535_20140818
13.1375	6.4485	1.17e-07	2.01e-05	45342_t	1485	F-box/RNI superfamily protein, putative	Medtr7g087040.1_F-box/RNI_superfamily_protein,_putative_LC_chr7:33859934-33866416_20140818
19.3008	6.44393	3.06e-06	0.000270844	131971_t	2220	copia LTR rider	Medtr3g022740.1_Ty1/Copia-like_polyprotein/retrotransposon_LC_chr3:6792938-6796622_20140818
28.1256	6.42398	1.45e-10	7.76e-08	MSTRG.69454.1	832	---NA---	---NA---
20.2028	6.37821	1.82e-10	9.45e-08	182571_t	2598	protein FAR1-related sequence 5-like	Medtr5g045210.1_hypothetical_protein_LC_chr5:19831500-19829892_20140818
19.8545	6.34024	5.65e-10	2.36e-07	59208_t	2598	protein FAR1-related sequence 5-like	Medtr5g045210.1_hypothetical_protein_LC_chr5:19831500-19829892_20140818
26.4821	6.27364	0.000131745	0.00471694	MSTRG.63876.1	301	---NA---	---NA---
75.9615	6.25138	2.18e-06	0.000208654	MSTRG.57700.1	1103	hypothetical protein MTR_1g115940	Medtr1g115940.1_hypothetical_protein_HC_chr1:52388483-52387233_20140818
24.0707	6.22245	7.28e-08	1.36e-05	MSTRG.73195.1	2052	replication factor-A carboxy-terminal domain protein	Medtr6g464080.1_replication_factor-A_carboxy-terminal_domain_protein_LC_chr6:22311880-22315905_20140818
25.1945	6.07805	0.000130241	0.004688	MSTRG.43923.1	532	---NA---	---NA---
40.0446	5.93535	6.35e-10	2.57e-07	MSTRG.46616.2	1078	transmembrane protein, putative	Medtr7g068350.1_transmembrane_protein,_putative_LC_chr7:25002434-25001592_20140818
18.0671	5.91733	0.0022757	0.0352874	MSTRG.61948.1	312	---NA---	---NA---
18.7878	5.90937	0.00196817	0.0319471	MSTRG.88624.3	899	plant OB fold protein, putative	Medtr8g047190.1_hypothetical_protein_LC_chr8:18731876-18732718_20140818
46.3349	5.73417	2.63e-11	1.73e-08	MSTRG.56390.5	521	PPR containing protein, putative	Medtr4g133410.7_PPR_containing_protein,_putative_HC_chr4:55806827-55802637_20140818
23.1059	5.59107	6.14e-07	7.66e-05	168706_t	738	---NA---	---NA---
14.3261	5.58159	8.36e-05	0.00337965	48234_t	1662	replication factor-A carboxy-terminal domain protein	Medtr6g464080.1_replication_factor-A_carboxy-terminal_domain_protein_LC_chr6:22311880-22315905_20140818
28.4414	5.54567	2.03e-07	3.15e-05	MSTRG.36645.2	960	zeaxanthin epoxidase	Medtr1g061710.1_sulfite_exporter_TauE/SafE_family_protein_LC_chr1:26959803-26956544_20140818
17.0036	5.52707	1.64e-09	5.9e-07	185469_t	1188	plant-specific B3-DNA-binding domain protein	Medtr3g061330.1_plant-specific_B3-DNA-binding_domain_protein_LC_chr3:24357917-24359356_20140818
22.2528	5.36639	4.43e-08	9.01e-06	MSTRG.36645.1	501	zeaxanthin epoxidase	Medtr5g017350.4_zeaxanthin_epoxidase_HC_chr5:6313511-6323118_20140818
35.9829	5.29369	1.54e-08	3.74e-06	112249_t	3090	NBS-LRR type disease resistance protein	Medtr6g046570.1_disease_resistance_protein_(CC-NBS-LRR_class)_family_protein_LC_chr6:16844869-16841087_20140818
32.021	5.2589	0.000924061	0.0191075	MSTRG.15848.1	644	myo-inositol oxygenase	Medtr8g102150.1_myo-inositol_oxygenase_HC_chr8:42953014-42955629_20140818
38.6701	5.23871	0.000339453	0.00938079	MSTRG.50782.1	1381	glycoside hydrolase family 5 protein	Medtr3g008960.1_glycoside_hydrolase_family_5_protein_HC_chr3:1722274-1716738_20140818
35.9675	5.2261	1.79e-09	6.38e-07	114357_t	3246	plastocyanin-like domain protein	Medtr3g080710.1_hypothetical_protein_LC_chr3:36530669-36531283_20140818
32.5865	5.15555	6.27e-05	0.00273917	181975_t	903	transmembrane protein, putative	Medtr5g078270.1_hypothetical_protein_HC_chr5:33448201-33449853_20140818
57.5588	5.05727	0.000626709	0.0144761	MSTRG.12808.1	3408	replication factor C, putative	Medtr5g020810.1_replication_factor_C,_putative_HC_chr5:7969752-7973533_20140818
25.519	5.03099	3.59e-07	4.96e-05	MSTRG.70547.2	462	---NA---	---NA---
16.641	5.00293	8.12e-08	1.49e-05	MSTRG.53873.1	430	---NA---	---NA---
44.3587	4.99529	1.94e-05	0.0011283	94817_t	981	transmembrane protein, putative	Medtr4g059020.1_hypothetical_protein_LC_chr4:21781510-21780682_20140818
31.8859	4.97117	0.00111504	0.0217173	MSTRG.79515.2	1060	light-harvesting complex I chlorophyll A/B-binding protein	Medtr6g012080.1_light-harvesting_complex_I_chlorophyll_A/B-binding_protein_HC_chr6:3575571-3576676_20140818
32.5326	4.89731	7.62e-07	9.13e-05	175909_t	2739	disease resistance protein (TIR-NBS-LRR class)	Medtr6g478080.1_disease_resistance_protein_(TIR-NBS-LRR_class)_LC_chr6:28899364-28906820_20140818
16.7241	4.88676	3.16e-07	4.49e-05	143716_t	1857	receptor-like kinase	Medtr1g027370.1_receptor-like_kinase_LC_chr1:9071583-9069147_20140818
35.1545	4.81208	8.59e-10	3.37e-07	107039_t	2016	MORC family CW-type zinc finger protein 3-like isoform X1	Medtr5g024810.1_CW-type_zinc_finger_protein_HC_chr5:10011299-9997842_20140818
13.4649	4.72901	0.000904871	0.0188167	125099_t	2451	DNA (cytosine-5)-methyltransferase CMT3-like protein	Medtr6g037900.1_DNA_(cytosine-5)-methyltransferase_CMT1_HC_chr6:13541009-13535486_20140818
26.9472	4.72183	1.63e-06	0.000165446	MSTRG.70547.1	557	---NA---	---NA---
27.5311	4.64066	0.00162198	0.0281124	121375_t	2139	replication factor C, putative	Medtr5g020810.1_replication_factor_C,_putative_HC_chr5:7969752-7973533_20140818
19.5304	4.56494	7.34e-07	8.84e-05	MSTRG.40511.1	426	elongation of fatty acids protein 3-like	Medtr7g113780.1_GNS1/SUR4_membrane_family_protein_HC_chr7:46891888-46892867_20140818
25.8237	4.5423	4.32e-06	0.000350908	MSTRG.46323.2	734	probable polygalacturonase At3g15720	Medtr8g010110.1_polygalacturonase_LC_chr8:2562133-2566759_20140818
21.7074	4.33586	4.17e-05	0.00201943	MSTRG.25681.3	999	replication factor C, putative	Medtr5g020810.1_replication_factor_C,_putative_HC_chr5:7969752-7973533_20140818
27.8288	4.30573	2.2e-06	0.000210311	MSTRG.16576.1	813	leghemoglobin Lb120-1	Medtr1g090820.1_leghemoglobin_Lb120-1_HC_chr1:40847905-40845877_20140818
24.7359	4.19665	2.99e-05	0.00157949	43531_t	609	PPR superfamily protein	Medtr1g021250.1_pentatricopeptide_(PPR)_repeat_protein_LC_chr1:6327520-6326399_20140818
152.066	4.13449	0.00049898	0.0123231	MSTRG.61664.2	641	---NA---	---NA---
21.7676	4.10865	0.00356012	0.0476699	MSTRG.12808.3	1720	replication factor C, putative	Medtr5g020810.1_replication_factor_C,_putative_HC_chr5:7969752-7973533_20140818
58.8434	4.08024	0.000337575	0.00934725	MSTRG.6359.1	728	---NA---	---NA---
19.2104	4.0182	0.000271863	0.00797741	MSTRG.78402.2	1886	Retrovirus-related Pol polyprotein from transposon TNT 1-94	Medtr6g472230.1_disease_resistance_protein_(TIR-NBS-LRR_class),_putative_LC_chr6:26054240-26059623_20140818
20.4435	3.86765	1.53e-05	0.000947808	MSTRG.16116.2	852	pentatricopeptide repeat-containing protein At3g62890-like	Medtr3g052720.1_organelle_transcript_processing_protein,_putative_HC_chr3:20868148-20864227_20140818
23.5948	3.80873	3.8e-06	0.000319922	MSTRG.62643.4	846	hypothetical protein MTR_0125s0060	Medtr0125s0060.1_hypothetical_protein_LC_scaffold0125:19417-19025_20140818
58.1523	3.79298	5.81e-05	0.00258841	MSTRG.55426.1	303	---NA---	Medtr7g068350.1_transmembrane_protein,_putative_LC_chr7:25002434-25001592_20140818
21.2317	3.78053	0.000632508	0.0145852	194108_t	2178	replication factor C, putative	Medtr5g020810.1_replication_factor_C,_putative_HC_chr5:7969752-7973533_20140818
22.017	3.68849	0.00129438	0.023998	MSTRG.86663.1	1420	inositol polyphosphate 5-phosphatase I	Medtr8g091360.1_inositol_polyphosphate_5-phosphatase_I_HC_chr8:38057021-38053787_20140818
17.7945	3.61538	4.17e-05	0.00201943	MSTRG.62643.9	551	40S ribosomal protein s21-2-like	Medtr7g076530.1_40S_ribosomal_S21-like_protein_HC_chr7:28815298-28816510_20140818
25.1591	3.32828	0.000251151	0.00753025	MSTRG.66042.2	893	hypothetical protein TSUD_166920	Medtr1g100145.1_transmembrane_protein,_putative_LC_chr1:45121762-45124510_20140818
31.9035	3.18616	1.77e-05	0.00105696	63043_t	1167	putative pentatricopeptide repeat-containing protein At1g16830	Medtr7g006590.1_PPR_superfamily_protein_LC_chr7:760379-761007_20140818
25.9679	3.15559	0.000729195	0.0161406	172899_t	492	hypothetical protein L195_g003107	Medtr6g024130.1_hypothetical_protein_LC_chr6:8569246-8572864_20140818
30.4204	3.01662	0.00111725	0.021731	MSTRG.69103.9	1025	---NA---	---NA---

## Sheet: Table S4.3. GO
Supporting information Table S4.3. Functional profiling of up-regulated DETs in resistant cv. MNGRN-16 using Blast2Go specifically to "response to stress" and " response to stimulus" categories.
baseMean	ID (this study)	Sequence Length	Sequence Description NCBI	Sequence description & ID, Medicago truncatula
Response to stress cv. MNGRN-16
205.92	MSTRG.82288.3	1916	adenine nucleotide alpha hydrolase superfamily protein	Medtr1g054765.1_adenine_nucleotide_alpha_hydrolase_superfamily_protein_HC_chr1:23937943-23936722_20140818
48.5878	MSTRG.82288.16	1940	adenine nucleotide alpha hydrolase superfamily protein	Medtr1g054765.1_adenine_nucleotide_alpha_hydrolase_superfamily_protein_HC_chr1:23937943-23936722_20140818
149.839	MSTRG.14320.1	5217	ATP-dependent DNA helicase PIF1	Medtr2g089470.1_PIF1-like_helicase_LC_chr2:37822429-37825668_20140818
116.903	MSTRG.69094.1	5148	ATP-dependent DNA helicase PIF1	Medtr2g089470.1_PIF1-like_helicase_LC_chr2:37822429-37825668_20140818
151.194	MSTRG.14320.4	4095	ATP-dependent DNA helicase PIF1	Medtr2g089470.1_PIF1-like_helicase_LC_chr2:37822429-37825668_20140818
67.3791	90670_t	1752	ATP-dependent DNA helicase PIF1	Medtr7g022020.1_PIF1-like_helicase_LC_chr7:7038991-7036186_20140818
59.9329	52004_t	1752	ATP-dependent DNA helicase PIF1	Medtr7g022020.1_PIF1-like_helicase_LC_chr7:7038991-7036186_20140818
103.308	81969_t	7437	ATP-dependent DNA helicase PIF1	Medtr5g018790.1_OTU-like_cysteine_protease_HC_chr5:7021030-7018511_20140818
79.2584	MSTRG.69094.4	1971	ATP-dependent DNA helicase PIF1	Medtr8g447120.1_AT_hook_motif_protein,_putative_LC_chr8:18486456-18487766_20140818
27.1127	MSTRG.81905.9	403	structural maintenance-like chromosomes-protein	Medtr3g033470.1_structural_maintenance-like_chromosomes-protein_HC_chr3:10689887-10707051_20140818
42.2026	MSTRG.11236.3	1467	ATP-dependent DNA helicase PIF1	Medtr0048s0090.1_hypothetical_protein_LC_scaffold0048:36104-39426_20140818
36.674	MSTRG.19044.1	1147	non-structural maintenance of chromosomes element 4 homolog A-like isoform X1	Medtr7g093090.1_Nse4,_component_of_Smc5/6_DNA_repair_complex_protein_HC_chr7:36968665-36972152_20140818
47.0312	152535_t	2745	DEAD-box ATP-dependent RNA helicase 38	Medtr1g061970.1_DEAD-box_ATP-dependent_RNA_helicase-like_protein_HC_chr1:27069344-27076281_20140818
81.5534	MSTRG.15734.3	1198	LysM receptor kinase K1B	Medtr5g086040.3_LysM_receptor_kinase_K1B_HC_chr5:37200474-37204679_20140818
84.1778	MSTRG.23765.1	2214	DnaJ-class molecular chaperone	Medtr5g048560.1_transmembrane_protein,_putative_LC_chr5:21253619-21256479_20140818
33.0723	151593_t	1638	B3 DNA-binding domain protein	Medtr5g071410.1_hypothetical_protein_LC_chr5:30312185-30310238_20140818
50.2062	MSTRG.19044.2	1278	non-structural maintenance of chromosomes element 4 homolog A-like isoform X1	Medtr7g093090.1_Nse4,_component_of_Smc5/6_DNA_repair_complex_protein_HC_chr7:36968665-36972152_20140818
112.783	MSTRG.27641.2	1523	peroxidase family protein	Medtr2g028980.1_peroxidase_family_protein_HC_chr2:10794705-10792786_20140818
154.416	55857_t	1056	universal stress protein A-like protein	Medtr1g087200.1_universal_stress_family_protein_HC_chr1:39067837-39069242_20140818
39.2401	MSTRG.41314.1	680	animal RPA1 domain protein	Medtr6g465570.1_animal_RPA1_domain_protein_LC_chr6:23330063-23328693_20140818
136.679	157068_t	5667	helicase-like protein	Medtr3g085530.1_PIF1-like_helicase_LC_chr3:38658911-38655923_20140818
230.659	MSTRG.82289.1	1404	adenine nucleotide alpha hydrolase superfamily protein	Medtr1g054765.1_adenine_nucleotide_alpha_hydrolase_superfamily_protein_HC_chr1:23937943-23936722_20140818
156.646	MSTRG.50222.1	255	peroxidase 42	Medtr4g132110.2_cationic_peroxidase_HC_chr4:55186829-55184196_20140818
42.2561	MSTRG.50867.2	1436	condensin-2 complex subunit H2-like protein	Medtr2g436080.1_condensin-2_complex_subunit_H2-like_protein_HC_chr2:13980124-13986564_20140818
372.003	MSTRG.52933.3	2281	poly(ADP-ribose) polymerase domain protein	Medtr4g053530.1_poly(ADP-ribose)_polymerase_domain_protein_HC_chr4:19342499-19346920_20140818
150.133	MSTRG.13365.1	5789	helicase-like protein	Medtr3g085530.1_PIF1-like_helicase_LC_chr3:38658911-38655923_20140818
331.281	MSTRG.52933.4	1980	poly(ADP-ribose) polymerase domain protein	Medtr4g053530.1_poly(ADP-ribose)_polymerase_domain_protein_HC_chr4:19342499-19346920_20140818
198.435	138950_t	333	ABA/WDS induced protein	Medtr6g037220.1_ABA/WDS_induced_protein_HC_chr6:13090285-13088621_20140818
148.534	153813_t	399	late embryogenesis abundant protein Lea5	Medtr4g120040.1_late_embryogenesis_abundant_protein_HC_chr4:49759382-49760884_20140818
85.9082	MSTRG.24590.1	2163	transmembrane protein, putative	Medtr1g105765.1_transmembrane_protein,_putative_HC_chr1:47722495-47723773_20140818
229.471	MSTRG.62629.2	844	DnaJ-class molecular chaperone	Medtr2g087660.1_DnaJ-class_molecular_chaperone_HC_chr2:36877846-36880571_20140818
89.092	MSTRG.2581.14	1238	Poly [ADP-ribose] polymerase 3	Medtr4g053530.1_poly(ADP-ribose)_polymerase_domain_protein_HC_chr4:19342499-19346920_20140818
201.152	MSTRG.62629.1	1035	DnaJ-class molecular chaperone	Medtr2g087660.1_DnaJ-class_molecular_chaperone_HC_chr2:36877846-36880571_20140818
52.4965	MSTRG.37071.3	1055	MAP kinase kinase	Medtr6g005210.1_MAP_kinase_kinase_HC_chr6:656528-650537_20140818
58.4337	MSTRG.37281.1	887	phytohormone-binding protein-like	Medtr3g055130.1_pathogenesis-related_protein_bet_V_I_family_protein_HC_chr3:21661924-21660763_20140818
3198.47	MSTRG.32696.5	616	hypothetical protein MTR_7g065130	Medtr7g065130.1_hypothetical_protein_HC_chr7:23733151-23734236_20140818
116.571	MSTRG.65735.1	627	ankyrin repeat and zinc finger protein, putative	Medtr7g075185.1_ankyrin_repeat_and_zinc_finger_protein,_putative_LC_chr7:28229985-28216076_20140818
223.519	MSTRG.52933.6	2649	poly(ADP-ribose) polymerase domain protein	Medtr4g053530.1_poly(ADP-ribose)_polymerase_domain_protein_HC_chr4:19342499-19346920_20140818
371.672	MSTRG.87207.1	7058	CC-NBS-LRR resistance protein	Medtr8g028520.1_Rpp4C4_LC_chr8:10879404-10889130_20140818
259.106	MSTRG.52933.9	2858	poly(ADP-ribose) polymerase domain protein	Medtr4g053530.1_poly(ADP-ribose)_polymerase_domain_protein_HC_chr4:19342499-19346920_20140818
1520.33	128500_t	306	Defensin-like protein	Medtr8g070770.1_Defensin_MtDef4.2_HC_chr8:29809141-29808336_20140818
713.183	11457_t	597	Indole-3-acetic acid-induced protein ARG2	Medtr1g088230.1_late_embryogenesis_abundant_protein_HC_chr1:39491348-39490105_20140818
1828.48	MSTRG.32696.4	724	hypothetical protein MTR_7g065130	Medtr7g065130.1_hypothetical_protein_HC_chr7:23733151-23734236_20140818
2154.36	MSTRG.32696.6	683	hypothetical protein MTR_7g065130	Medtr7g065130.1_hypothetical_protein_HC_chr7:23733151-23734236_20140818
435.516	45486_t	459	pathogenesis-related protein bet V I family protein	Medtr8g045570.1_pathogenesis-related_protein_bet_V_I_family_protein_HC_chr8:17825808-17821846_20140818
439.272	34374_t	459	pathogenesis-related protein bet V I family protein	Medtr8g045570.1_pathogenesis-related_protein_bet_V_I_family_protein_HC_chr8:17825808-17821846_20140818
446.031	MSTRG.32696.3	260	hypothetical protein MTR_7g065130	Medtr7g065130.1_hypothetical_protein_HC_chr7:23733151-23734236_20140818
197.659	MSTRG.13365.7	858	replication factor-A carboxy-terminal domain protein	Medtr1g105785.1_replication_factor-A_carboxy-terminal_domain_protein_HC_chr1:47732917-47735741_20140818
50.7175	MSTRG.81745.1	500	flocculation protein FLO11-like isoform X2	Medtr7g073720.1_hypothetical_protein_HC_chr7:27594597-27590526_20140818
124.142	MSTRG.46079.2	298	catalase heme-binding enzyme	Medtr3g115370.1_catalase_heme-binding_enzyme_HC_chr3:53951098-53955670_20140818
316.157	MSTRG.82288.8	1827	adenine nucleotide alpha hydrolase superfamily protein	Medtr1g054765.1_adenine_nucleotide_alpha_hydrolase_superfamily_protein_HC_chr1:23937943-23936722_20140818
39.2486	125446_t	1155	PIF1-like helicase	Medtr5g087830.1_PIF1-like_helicase_HC_chr5:38096392-38095511_20140818
340.046	129102_t	660	core histone H2A/H2B/H3/H4	Medtr4g128150.1_core_histone_H2A/H2B/H3/H4_LC_chr4:53328594-53330943_20140818
81.0369	MSTRG.18770.11	594	poly(ADP-ribose) polymerase domain protein	Medtr4g053530.1_poly(ADP-ribose)_polymerase_domain_protein_HC_chr4:19342499-19346920_20140818
2528.11	MSTRG.32696.2	479	hypothetical protein MTR_7g065130	Medtr7g065130.1_hypothetical_protein_HC_chr7:23733151-23734236_20140818
139.663	29478_t	912	peroxidase family protein	Medtr2g029910.1_peroxidase_family_protein_HC_chr2:11192617-11190342_20140818
385.091	MSTRG.32696.1	261	hypothetical protein MTR_7g065130	Medtr7g065130.1_hypothetical_protein_HC_chr7:23733151-23734236_20140818
40.7484	MSTRG.55123.2	1004	meiotic recombination protein dmc1 like	Medtr1g102670.1_meiotic_recombination_protein_DMC1,_putative_HC_chr1:46400379-46403108_20140818
110.473	193889_t	1905	DEAD-box ATP-dependent RNA helicase 56	Medtr3g107420.2_DEAD-box_ATP-dependent_RNA_helicase-like_protein_HC_chr3:49555719-49558567_20140818
78.2995	MSTRG.42041.4	789	flocculation protein FLO11	Medtr7g073720.1_hypothetical_protein_HC_chr7:27594597-27590526_20140818
235.297	MSTRG.46079.1	301	catalase 1b	Medtr3g115370.2_catalase_heme-binding_enzyme_HC_chr3:53951147-53954902_20140818
154.318	MSTRG.18770.10	1277	poly(ADP-ribose) polymerase domain protein	Medtr4g053530.1_poly(ADP-ribose)_polymerase_domain_protein_HC_chr4:19342499-19346920_20140818
152.871	MSTRG.18770.7	1217	poly(ADP-ribose) polymerase domain protein	Medtr4g053530.1_poly(ADP-ribose)_polymerase_domain_protein_HC_chr4:19342499-19346920_20140818
174.556	MSTRG.21496.2	595	inhibitor of trypsin and hageman factor-like protein	Medtr1g075340.2_inhibitor_of_trypsin_and_hageman_factor-like_protein_HC_chr1:33356256-33356876_20140818
100.801	MSTRG.42041.3	737	flocculation protein FLO11	Medtr7g073720.1_hypothetical_protein_HC_chr7:27594597-27590526_20140818
103.065	MSTRG.52933.7	2162	poly(ADP-ribose) polymerase domain protein	Medtr4g053530.1_poly(ADP-ribose)_polymerase_domain_protein_HC_chr4:19342499-19346920_20140818
198.667	MSTRG.41942.2	2151	C-terminal binding protein AN	Medtr7g078990.1_carboxy-terminal-binding_protein_AN_HC_chr7:29912264-29905927_20140818
1054.9	MSTRG.70674.2	798	late embryogenesis abundant protein Lea5	Medtr4g120040.1_late_embryogenesis_abundant_protein_HC_chr4:49759382-49760884_20140818
2710.01	MSTRG.20099.7	929	disease-resistance response protein	Medtr2g035100.2_disease-resistance_response_protein_chr2:13483915-13486217_20140818
129.627	157367_t	738	peroxidase family protein	Medtr2g029910.1_peroxidase_family_protein_HC_chr2:11192617-11190342_20140818
52.8822	MSTRG.80108.6	2050	lariat debranching enzyme	Medtr3g105810.1_lariat_debranching_enzyme_HC_chr3:48808334-48804213_20140818
150.887	MSTRG.83941.8	1937	ubiquitin-activating enzyme E1 1	Medtr5g072480.1_ubiquitin-activating_enzyme_E1_1_HC_chr5:30842736-30830993_20140818
157.536	56877_t	1854	C-terminal binding protein AN	Medtr7g078990.1_carboxy-terminal-binding_protein_AN_HC_chr7:29912264-29905927_20140818
77.8165	MSTRG.23123.1	2712	DNA repair helicase XPB1	Medtr8g098675.1_DNA_repair_helicase_XPB1_HC_chr8:41191751-41200265_20140818
129.988	MSTRG.2581.15	1635	poly [ADP-ribose] polymerase 3	Medtr4g053530.1_poly(ADP-ribose)_polymerase_domain_protein_HC_chr4:19342499-19346920_20140818
3729.7	MSTRG.39063.2	643	defensin-like protein	Medtr2g079440.1_Defensin_MtDef1.1/MtDef1.2_HC_chr2:33435244-33435770_20140818
1059.32	MSTRG.76762.1	1289	late embryogenesis abundant protein	Medtr4g120040.1_late_embryogenesis_abundant_protein_HC_chr4:49759382-49760884_20140818
224.722	MSTRG.41942.1	2230	C-terminal binding protein AN	Medtr7g078990.1_carboxy-terminal-binding_protein_AN_HC_chr7:29912264-29905927_20140818
115.111	MSTRG.82216.4	856	F-box protein PP2-A13-like	Medtr0002s0020.1_F-box_protein_PP2-A13_HC_scaffold0002:6674-10318_20140818
104.078	MSTRG.18770.8	1014	poly(ADP-ribose) polymerase domain protein	Medtr4g053530.1_poly(ADP-ribose)_polymerase_domain_protein_HC_chr4:19342499-19346920_20140818
220.128	110376_t	690	ubiquitin-conjugating enzyme E2 35	Medtr2g078010.4_ubiquitin-conjugating_enzyme_HC_chr2:32320407-32326653_20140818
178.832	MSTRG.69546.1	2095	calmodulin-binding protein	Medtr7g111980.1_calmodulin-binding_protein_LC_chr7:46033260-46029612_20140818
92.4213	31335_t	864	F-box protein pp2-a13-like	Medtr0002s0020.1_F-box_protein_PP2-A13_HC_scaffold0002:6674-10318_20140818
262.489	193689_t	498	universal stress protein A-like protein	Medtr1g083950.1_universal_stress_family_protein_HC_chr1:37410238-37411974_20140818
289.983	MSTRG.13365.4	1530	replication factor-A carboxy-terminal domain protein	Medtr1g105785.1_replication_factor-A_carboxy-terminal_domain_protein_HC_chr1:47732917-47735741_20140818
211.532	MSTRG.86067.12	1230	DnaJ-class molecular chaperone	Medtr2g087660.1_DnaJ-class_molecular_chaperone_HC_chr2:36877846-36880571_20140818
187.523	MSTRG.18770.9	1373	poly(ADP-ribose) polymerase domain protein	Medtr4g053530.1_poly(ADP-ribose)_polymerase_domain_protein_HC_chr4:19342499-19346920_20140818
256.995	106998_t	1098	serine/threonine-protein kinase SAPK2	Medtr5g064540.1_Serine/Threonine-kinase_SAPK1-like_protein_HC_chr5:27108263-27103767_20140818
136.367	154605_t	1710	calmodulin-binding protein	Medtr7g111980.1_calmodulin-binding_protein_LC_chr7:46033260-46029612_20140818
130.675	MSTRG.37583.6	871	DnaJ-class molecular chaperone	Medtr2g087660.1_DnaJ-class_molecular_chaperone_HC_chr2:36877846-36880571_20140818
499.233	MSTRG.19178.1	1121	DSBA oxidoreductase family protein	Medtr7g016650.2_DSBA_oxidoreductase_family_protein_HC_chr7:5267213-5271627_20140818
52.3601	MSTRG.51213.3	1060	Lon-related ATP-dependent protease, putative	Medtr1g084020.1_Lon-related_ATP-dependent_protease,_putative_HC_chr1:37466754-37455374_20140818
367.273	MSTRG.36194.6	1061	MLO-like protein 1	Medtr3g118190.1_seven_transmembrane_MLO_family_protein_HC_chr3:55320648-55325251_20140818
965.858	77305_t	894	class III peroxidase	Medtr5g083860.1_class_III_peroxidase_HC_chr5:36189329-36191603_20140818
132.955	MSTRG.18770.2	1712	poly(ADP-ribose) polymerase domain protein	Medtr4g053530.1_poly(ADP-ribose)_polymerase_domain_protein_HC_chr4:19342499-19346920_20140818
343.261	MSTRG.86642.2	3411	calmodulin-binding transcription activator	Medtr8g090205.1_calmodulin-binding_transcription_activator_HC_chr8:37845878-37838861_20140818
364.425	34750_t	4098	methylthioribose-1-phosphate isomerase	Medtr2g042440.1_RecQ_family_ATP-dependent_DNA_helicase_HC_chr2:18525936-18516322_20140818
156.351	MSTRG.81974.10	1712	E3 ubiquitin-protein ligase BRE1-like 1 isoform X1	Medtr7g046250.1_E3_ubiquitin-protein_ligase_BRE1-like_protein_HC_chr7:16333806-16352752_20140818
313.492	MSTRG.86642.3	2823	calmodulin-binding transcription activator	Medtr8g090205.1_calmodulin-binding_transcription_activator_HC_chr8:37845878-37838861_20140818
110.174	MSTRG.2774.1	951	thioredoxin M-type protein	Medtr8g059015.1_thioredoxin_M-type_protein_HC_chr8:20541253-20543952_20140818
131.892	MSTRG.70467.1	2712	DNA repair helicase XPB1	Medtr8g098675.1_DNA_repair_helicase_XPB1_HC_chr8:41191751-41200265_20140818
435.797	MSTRG.39218.2	753	autophagy-related protein 8i-like	Medtr1g086310.1_autophagy_protein_Atg8_ubiquitin-like_protein_HC_chr1:38625116-38626309_20140818
101.852	47710_t	900	pyrroline-5-carboxylate reductase	Medtr7g090160.1_pyrroline-5-carboxylate_reductase_HC_chr7:35393068-35388752_20140818
Cellular response to stimulus cv. MNGRN-16
150.164	MSTRG.77109.1	1313	acid phosphatase/vanadium-dependent haloperoxidase	Medtr3g085670.1_acid_phosphatase/vanadium-dependent_haloperoxidase_HC_chr3:38761891-38758587_20140818
32.3422	MSTRG.24572.2	788	AGC kinase	Medtr1g042700.1_AGC_kinase_HC_chr1:15872146-15867493_20140818
39.2401	MSTRG.41314.1	680	animal RPA1 domain protein	Medtr6g465570.1_animal_RPA1_domain_protein_LC_chr6:23330063-23328693_20140818
116.571	MSTRG.65735.1	627	ankyrin repeat and zinc finger protein, putative	Medtr7g075185.1_ankyrin_repeat_and_zinc_finger_protein,_putative_LC_chr7:28229985-28216076_20140818
344.965	MSTRG.14466.1	2531	armadillo repeat only 1 protein	Medtr4g105110.2_armadillo_repeat_only_1_protein_HC_chr4:43549436-43551628_20140818
149.839	MSTRG.14320.1	5217	ATP-dependent DNA helicase PIF1	Medtr2g089470.1_PIF1-like_helicase_LC_chr2:37822429-37825668_20140818
116.903	MSTRG.69094.1	5148	ATP-dependent DNA helicase PIF1	Medtr2g089470.1_PIF1-like_helicase_LC_chr2:37822429-37825668_20140818
151.194	MSTRG.14320.4	4095	ATP-dependent DNA helicase PIF1	Medtr2g089470.1_PIF1-like_helicase_LC_chr2:37822429-37825668_20140818
67.3791	90670_t	1752	ATP-dependent DNA helicase PIF1	Medtr7g022020.1_PIF1-like_helicase_LC_chr7:7038991-7036186_20140818
59.9329	52004_t	1752	ATP-dependent DNA helicase PIF1	Medtr7g022020.1_PIF1-like_helicase_LC_chr7:7038991-7036186_20140818
103.308	81969_t	7437	ATP-dependent DNA helicase PIF1	Medtr5g018790.1_OTU-like_cysteine_protease_HC_chr5:7021030-7018511_20140818
79.2584	MSTRG.69094.4	1971	ATP-dependent DNA helicase PIF1	Medtr8g447120.1_AT_hook_motif_protein,_putative_LC_chr8:18486456-18487766_20140818
42.2026	MSTRG.11236.3	1467	ATP-dependent DNA helicase PIF1	Medtr0048s0090.1_hypothetical_protein_LC_scaffold0048:36104-39426_20140818
435.797	MSTRG.39218.2	753	autophagy-related protein 8i-like	Medtr1g086310.1_autophagy_protein_Atg8_ubiquitin-like_protein_HC_chr1:38625116-38626309_20140818
74.3116	MSTRG.12976.3	640	Calcium-dependent protein kinase 1	Medtr1g041150.1_calmodulin-domain_kinase_CDPK_protein_HC_chr1:18398807-18403890_20140818
101.732	MSTRG.12976.2	724	Calcium-dependent protein kinase 1	Medtr1g041150.1_calmodulin-domain_kinase_CDPK_protein_HC_chr1:18398807-18403890_20140818
111.878	MSTRG.30761.7	1647	calcium-dependent protein kinase 20-like	Medtr1g054865.1_calmodulin-domain_kinase_CDPK_protein_HC_chr1:24041840-24046332_20140818
203.308	MSTRG.30761.3	2023	calcium-dependent protein kinase 20-like	Medtr1g054865.1_calmodulin-domain_kinase_CDPK_protein_HC_chr1:24041840-24046332_20140818
266.924	MSTRG.30761.1	2198	calcium-dependent protein kinase 20-like	Medtr1g054865.1_calmodulin-domain_kinase_CDPK_protein_HC_chr1:24041840-24046332_20140818
184.335	MSTRG.30761.2	2080	calcium-dependent protein kinase 20-like	Medtr1g054865.1_calmodulin-domain_kinase_CDPK_protein_HC_chr1:24041840-24046332_20140818
343.261	MSTRG.86642.2	3411	calmodulin-binding transcription activator	Medtr8g090205.1_calmodulin-binding_transcription_activator_HC_chr8:37845878-37838861_20140818
313.492	MSTRG.86642.3	2823	calmodulin-binding transcription activator	Medtr8g090205.1_calmodulin-binding_transcription_activator_HC_chr8:37845878-37838861_20140818
135.686	MSTRG.30761.5	1715	calmodulin-domain kinase CDPK protein	Medtr1g054865.1_calmodulin-domain_kinase_CDPK_protein_HC_chr1:24041840-24046332_20140818
235.297	MSTRG.46079.1	301	catalase 1b	Medtr3g115370.2_catalase_heme-binding_enzyme_HC_chr3:53951147-53954902_20140818
124.142	MSTRG.46079.2	298	catalase heme-binding enzyme	Medtr3g115370.1_catalase_heme-binding_enzyme_HC_chr3:53951098-53955670_20140818
3818.85	MSTRG.51147.3	1958	CBL-interacting serine/threonine-protein kinase 12	Medtr8g086380.1_CBL-interacting_kinase_HC_chr8:35827448-35829421_20140818
402.067	121168_t	1269	CBL-interacting serine/threonine-protein kinase 14-like	Medtr7g072605.1_CBL-interacting_kinase_HC_chr7:27044329-27042615_20140818
371.672	MSTRG.87207.1	7058	CC-NBS-LRR resistance protein	Medtr8g028520.1_Rpp4C4_LC_chr8:10879404-10889130_20140818
965.858	77305_t	894	class III peroxidase	Medtr5g083860.1_class_III_peroxidase_HC_chr5:36189329-36191603_20140818
42.2561	MSTRG.50867.2	1436	condensin-2 complex subunit H2-like protein	Medtr2g436080.1_condensin-2_complex_subunit_H2-like_protein_HC_chr2:13980124-13986564_20140818
110.473	193889_t	1905	DEAD-box ATP-dependent RNA helicase 56	Medtr3g107420.2_DEAD-box_ATP-dependent_RNA_helicase-like_protein_HC_chr3:49555719-49558567_20140818
158.354	MSTRG.42920.1	3616	disease resistance protein (TIR-NBS-LRR class)	Medtr1g007300.1_disease_resistance_protein_(TIR-NBS-LRR_class)_LC_chr1:268696-264988_20140818
87.8006	88065_t	3627	disease resistance protein (TIR-NBS-LRR class)	Medtr5g071610.1_disease_resistance_protein_(TIR-NBS-LRR_class),_putative_LC_chr5:30414477-30420343_20140818
151.303	MSTRG.42920.2	3455	disease resistance protein (TIR-NBS-LRR class)	Medtr1g007300.1_disease_resistance_protein_(TIR-NBS-LRR_class)_LC_chr1:268696-264988_20140818
79.5529	86266_t	2268	disease resistance protein (TIR-NBS-LRR class)	Medtr0019s0100.1_functional_resistance_protein_KR1,_putative_LC_scaffold0019:58637-54816_20140818
104.38	154396_t	2835	disease resistance protein (TIR-NBS-LRR class)	Medtr6g072250.1_disease_resistance_protein_(TIR-NBS-LRR_class)_LC_chr6:26728792-26732864_20140818
96.6865	MSTRG.2035.1	2725	disease resistance protein (TIR-NBS-LRR class)	Medtr6g075970.2_disease_resistance_protein_(TIR-NBS-LRR_class)_LC_chr6:28242590-28247236_20140818
99.3074	88170_t	5559	disease resistance protein (TIR-NBS-LRR class)	Medtr7g078180.1_disease_resistance_protein_(TIR-NBS-LRR_class),_putative_LC_chr7:29570689-29575843_20140818
124.819	59981_t	4290	disease resistance protein (TIR-NBS-LRR class)	Medtr4g020490.1_disease_resistance_protein_(TIR-NBS-LRR_class)_LC_chr4:6504602-6497070_20140818
135.563	59230_t	4365	disease resistance protein (TIR-NBS-LRR class)	Medtr4g020490.1_disease_resistance_protein_(TIR-NBS-LRR_class)_LC_chr4:6504602-6497070_20140818
142.017	59234_t	4365	disease resistance protein (TIR-NBS-LRR class)	Medtr4g020490.1_disease_resistance_protein_(TIR-NBS-LRR_class)_LC_chr4:6504602-6497070_20140818
114.619	56166_t	4416	disease resistance protein (TIR-NBS-LRR class)	Medtr5g090940.1_disease_resistance_protein_(TIR-NBS-LRR_class)_HC_chr5:39619088-39625198_20140818
32.8426	MSTRG.42914.2	1909	disease resistance protein (TIR-NBS-LRR class)	Medtr6g069560.1_disease_resistance_protein_(TIR-NBS-LRR_class)_LC_chr6:25071428-25077838_20140818
125.037	MSTRG.25312.5	2076	disease resistance protein (TIR-NBS-LRR class)	Medtr4g020700.2_disease_resistance_protein_(TIR-NBS-LRR_class)_LC_chr4:6645805-6656127_20140818
408.825	MSTRG.73880.3	3891	disease resistance protein (TIR-NBS-LRR class)	Medtr1g007300.1_disease_resistance_protein_(TIR-NBS-LRR_class)_LC_chr1:268696-264988_20140818
430.947	MSTRG.73880.1	3916	disease resistance protein (TIR-NBS-LRR class)	Medtr6g071935.1_NB-ARC_domain_protein_LC_chr6:26646248-26651415_20140818
439.207	24124_t	3912	disease resistance protein (TIR-NBS-LRR class)	Medtr6g071935.1_NB-ARC_domain_protein_LC_chr6:26646248-26651415_20140818
440.956	MSTRG.73880.4	2837	disease resistance protein (TIR-NBS-LRR class)	Medtr1g007300.1_disease_resistance_protein_(TIR-NBS-LRR_class)_LC_chr1:268696-264988_20140818
353.088	MSTRG.25312.1	6033	disease resistance protein (TIR-NBS-LRR class)	Medtr4g020700.1_disease_resistance_protein_(TIR-NBS-LRR_class)_LC_chr4:6645774-6655619_20140818
324.608	MSTRG.25312.2	6000	disease resistance protein (TIR-NBS-LRR class)	Medtr4g020700.1_disease_resistance_protein_(TIR-NBS-LRR_class)_LC_chr4:6645774-6655619_20140818
323.957	MSTRG.25312.4	5001	disease resistance protein (TIR-NBS-LRR class)	Medtr4g020700.1_disease_resistance_protein_(TIR-NBS-LRR_class)_LC_chr4:6645774-6655619_20140818
260.28	59270_t	5127	disease resistance protein (TIR-NBS-LRR class)	Medtr4g020700.2_disease_resistance_protein_(TIR-NBS-LRR_class)_LC_chr4:6645805-6656127_20140818
91.8871	168529_t	3108	disease resistance protein (TIR-NBS-LRR class)	Medtr6g015730.1_disease_resistance_protein_(TIR-NBS-LRR_class)_LC_chr6:5392461-5398787_20140818
48.077	MSTRG.61628.27	1517	disease resistance protein (TIR-NBS-LRR class)	Medtr6g074875.1_disease_resistance_protein_(TIR-NBS-LRR_class)_LC_chr6:27718819-27713865_20140818
109.022	59272_t	5046	disease resistance protein (TIR-NBS-LRR class)	Medtr4g021057.1_disease_resistance_protein_(TIR-NBS-LRR_class)_LC_chr4:6791029-6798592_20140818
132.942	77830_t	6846	disease resistance protein (TIR-NBS-LRR class)	Medtr6g079090.1_disease_resistance_protein_(TIR-NBS-LRR_class)_LC_chr6:29761538-29752605_20140818
175.959	MSTRG.29465.1	4856	disease resistance protein (TIR-NBS-LRR class)	Medtr3g058880.2_disease_resistance_protein_(TIR-NBS-LRR_class)_HC_chr3:23501701-23490353_20140818
189.094	MSTRG.46761.2	4445	disease resistance protein (TIR-NBS-LRR class)	Medtr6g488300.1_disease_resistance_protein_(TIR-NBS-LRR_class)_LC_chr6:33265990-33259390_20140818
307.816	MSTRG.18836.3	1277	disease resistance protein (TIR-NBS-LRR class)	Medtr6g078630.1_disease_resistance_protein_(TIR-NBS-LRR_class)_HC_chr6:29530050-29528847_20140818
158.596	MSTRG.29465.5	2926	disease resistance protein (TIR-NBS-LRR class)	Medtr3g058880.2_disease_resistance_protein_(TIR-NBS-LRR_class)_HC_chr3:23501701-23490353_20140818
50.358	155318_t	4371	disease resistance protein (TIR-NBS-LRR class)	Medtr6g079140.1_disease_resistance_protein_(TIR-NBS-LRR_class)_HC_chr6:29804255-29799693_20140818
241.456	MSTRG.21717.1	5398	disease resistance protein (TIR-NBS-LRR class)	Medtr5g090940.1_disease_resistance_protein_(TIR-NBS-LRR_class)_HC_chr5:39619088-39625198_20140818
174.005	MSTRG.46761.3	3558	disease resistance protein (TIR-NBS-LRR class)	Medtr6g488300.1_disease_resistance_protein_(TIR-NBS-LRR_class)_LC_chr6:33265990-33259390_20140818
156.851	MSTRG.23684.4	4504	disease resistance protein (TIR-NBS-LRR class)	Medtr8g032830.1_disease_resistance_protein_(TIR-NBS-LRR_class),_putative_LC_chr8:12588216-12593933_20140818
148.921	192928_t	4209	disease resistance protein (TIR-NBS-LRR class)	Medtr6g488300.1_disease_resistance_protein_(TIR-NBS-LRR_class)_LC_chr6:33265990-33259390_20140818
141.62	MSTRG.29465.3	2378	disease resistance protein (TIR-NBS-LRR class)	Medtr3g058880.2_disease_resistance_protein_(TIR-NBS-LRR_class)_HC_chr3:23501701-23490353_20140818
63.1813	MSTRG.40568.1	4492	disease resistance protein (TIR-NBS-LRR class)	Medtr6g079140.1_disease_resistance_protein_(TIR-NBS-LRR_class)_HC_chr6:29804255-29799693_20140818
133.378	4842_t	3507	disease resistance protein (TIR-NBS-LRR class)	Medtr3g058880.2_disease_resistance_protein_(TIR-NBS-LRR_class)_HC_chr3:23501701-23490353_20140818
37.7615	MSTRG.3948.1	2139	disease resistance protein (TIR-NBS-LRR class)	Medtr4g015030.1_disease_resistance_protein_(TIR-NBS-LRR_class)_HC_chr4:4332186-4338889_20140818
82.1701	MSTRG.21006.2	3008	disease resistance protein (TIR-NBS-LRR class), putative	Medtr7g078180.1_disease_resistance_protein_(TIR-NBS-LRR_class),_putative_LC_chr7:29570689-29575843_20140818
27.5834	MSTRG.85223.2	1308	disease resistance protein (TIR-NBS-LRR class), putative	Medtr6g088250.1_disease_resistance_protein_(TIR-NBS-LRR_class),_putative_LC_chr6:33403560-33394883_20140818
99.6166	185342_t	4998	disease resistance protein (TIR-NBS-LRR class), putative	Medtr0012s0290.3_disease_resistance_protein_(TIR-NBS-LRR_class),_putative_LC_scaffold0012:214659-207190_20140818
172.327	MSTRG.28921.2	3125	disease resistance protein (TIR-NBS-LRR class), putative	Medtr4g080777.1_disease_resistance_protein_(TIR-NBS-LRR_class),_putative_LC_chr4:31243045-31248009_20140818
171.775	162015_t	3222	disease resistance protein (TIR-NBS-LRR class), putative	Medtr4g080777.1_disease_resistance_protein_(TIR-NBS-LRR_class),_putative_LC_chr4:31243045-31248009_20140818
120.717	MSTRG.25317.2	5165	disease resistance protein (TIR-NBS-LRR class), putative	Medtr4g020590.1_disease_resistance_protein_(TIR-NBS-LRR_class),_putative_LC_chr4:6594472-6586360_20140818
74.4252	MSTRG.5780.1	5283	disease resistance protein (TIR-NBS-LRR class), putative	Medtr3g006280.1_disease_resistance_protein_(TIR-NBS-LRR_class)_LC_chr3:612952-621261_20140818
391.557	MSTRG.25274.2	5558	disease resistance protein (TIR-NBS-LRR class), putative	Medtr4g020590.1_disease_resistance_protein_(TIR-NBS-LRR_class),_putative_LC_chr4:6594472-6586360_20140818
77.8165	MSTRG.23123.1	2712	DNA repair helicase XPB1	Medtr8g098675.1_DNA_repair_helicase_XPB1_HC_chr8:41191751-41200265_20140818
131.892	MSTRG.70467.1	2712	DNA repair helicase XPB1	Medtr8g098675.1_DNA_repair_helicase_XPB1_HC_chr8:41191751-41200265_20140818
157.797	MSTRG.38171.5	2576	DNA replication factor CDT1-like protein	Medtr6g077680.2_DNA_replication_factor_CDT1-like_protein_LC_chr6:29816107-29811850_20140818
136.679	157068_t	5667	helicase-like protein	Medtr3g085530.1_PIF1-like_helicase_LC_chr3:38658911-38655923_20140818
150.133	MSTRG.13365.1	5789	helicase-like protein	Medtr3g085530.1_PIF1-like_helicase_LC_chr3:38658911-38655923_20140818
52.8822	MSTRG.80108.6	2050	lariat debranching enzyme	Medtr3g105810.1_lariat_debranching_enzyme_HC_chr3:48808334-48804213_20140818
52.3601	MSTRG.51213.3	1060	Lon-related ATP-dependent protease, putative	Medtr1g084020.1_Lon-related_ATP-dependent_protease,_putative_HC_chr1:37466754-37455374_20140818
81.5534	MSTRG.15734.3	1198	LysM receptor kinase K1B	Medtr5g086040.3_LysM_receptor_kinase_K1B_HC_chr5:37200474-37204679_20140818
52.4965	MSTRG.37071.3	1055	MAP kinase kinase	Medtr6g005210.1_MAP_kinase_kinase_HC_chr6:656528-650537_20140818
40.7484	MSTRG.55123.2	1004	meiotic recombination protein dmc1 like	Medtr1g102670.1_meiotic_recombination_protein_DMC1,_putative_HC_chr1:46400379-46403108_20140818
364.425	34750_t	4098	methylthioribose-1-phosphate isomerase	Medtr2g042440.1_RecQ_family_ATP-dependent_DNA_helicase_HC_chr2:18525936-18516322_20140818
36.674	MSTRG.19044.1	1147	non-structural maintenance of chromosomes element 4 homolog A-like isoform X1	Medtr7g093090.1_Nse4,_component_of_Smc5/6_DNA_repair_complex_protein_HC_chr7:36968665-36972152_20140818
50.2062	MSTRG.19044.2	1278	non-structural maintenance of chromosomes element 4 homolog A-like isoform X1	Medtr7g093090.1_Nse4,_component_of_Smc5/6_DNA_repair_complex_protein_HC_chr7:36968665-36972152_20140818
156.646	MSTRG.50222.1	255	peroxidase 42	Medtr4g132110.2_cationic_peroxidase_HC_chr4:55186829-55184196_20140818
112.783	MSTRG.27641.2	1523	peroxidase family protein	Medtr2g028980.1_peroxidase_family_protein_HC_chr2:10794705-10792786_20140818
139.663	29478_t	912	peroxidase family protein	Medtr2g029910.1_peroxidase_family_protein_HC_chr2:11192617-11190342_20140818
129.627	157367_t	738	peroxidase family protein	Medtr2g029910.1_peroxidase_family_protein_HC_chr2:11192617-11190342_20140818
39.2486	125446_t	1155	PIF1-like helicase	Medtr5g087830.1_PIF1-like_helicase_HC_chr5:38096392-38095511_20140818
89.092	MSTRG.2581.14	1238	Poly [ADP-ribose] polymerase 3	Medtr4g053530.1_poly(ADP-ribose)_polymerase_domain_protein_HC_chr4:19342499-19346920_20140818
129.988	MSTRG.2581.15	1635	poly [ADP-ribose] polymerase 3	Medtr4g053530.1_poly(ADP-ribose)_polymerase_domain_protein_HC_chr4:19342499-19346920_20140818
372.003	MSTRG.52933.3	2281	poly(ADP-ribose) polymerase domain protein	Medtr4g053530.1_poly(ADP-ribose)_polymerase_domain_protein_HC_chr4:19342499-19346920_20140818
331.281	MSTRG.52933.4	1980	poly(ADP-ribose) polymerase domain protein	Medtr4g053530.1_poly(ADP-ribose)_polymerase_domain_protein_HC_chr4:19342499-19346920_20140818
223.519	MSTRG.52933.6	2649	poly(ADP-ribose) polymerase domain protein	Medtr4g053530.1_poly(ADP-ribose)_polymerase_domain_protein_HC_chr4:19342499-19346920_20140818
259.106	MSTRG.52933.9	2858	poly(ADP-ribose) polymerase domain protein	Medtr4g053530.1_poly(ADP-ribose)_polymerase_domain_protein_HC_chr4:19342499-19346920_20140818
81.0369	MSTRG.18770.11	594	poly(ADP-ribose) polymerase domain protein	Medtr4g053530.1_poly(ADP-ribose)_polymerase_domain_protein_HC_chr4:19342499-19346920_20140818
154.318	MSTRG.18770.10	1277	poly(ADP-ribose) polymerase domain protein	Medtr4g053530.1_poly(ADP-ribose)_polymerase_domain_protein_HC_chr4:19342499-19346920_20140818
152.871	MSTRG.18770.7	1217	poly(ADP-ribose) polymerase domain protein	Medtr4g053530.1_poly(ADP-ribose)_polymerase_domain_protein_HC_chr4:19342499-19346920_20140818
103.065	MSTRG.52933.7	2162	poly(ADP-ribose) polymerase domain protein	Medtr4g053530.1_poly(ADP-ribose)_polymerase_domain_protein_HC_chr4:19342499-19346920_20140818
104.078	MSTRG.18770.8	1014	poly(ADP-ribose) polymerase domain protein	Medtr4g053530.1_poly(ADP-ribose)_polymerase_domain_protein_HC_chr4:19342499-19346920_20140818
187.523	MSTRG.18770.9	1373	poly(ADP-ribose) polymerase domain protein	Medtr4g053530.1_poly(ADP-ribose)_polymerase_domain_protein_HC_chr4:19342499-19346920_20140818
132.955	MSTRG.18770.2	1712	poly(ADP-ribose) polymerase domain protein	Medtr4g053530.1_poly(ADP-ribose)_polymerase_domain_protein_HC_chr4:19342499-19346920_20140818
60.8073	13353_t	1497	putative receptor-like protein kinase At1g72540	Medtr4g125260.1_receptor-like_kinase_HC_chr4:51940056-51937267_20140818
197.659	MSTRG.13365.7	858	replication factor-A carboxy-terminal domain protein	Medtr1g105785.1_replication_factor-A_carboxy-terminal_domain_protein_HC_chr1:47732917-47735741_20140818
289.983	MSTRG.13365.4	1530	replication factor-A carboxy-terminal domain protein	Medtr1g105785.1_replication_factor-A_carboxy-terminal_domain_protein_HC_chr1:47732917-47735741_20140818
312.848	MSTRG.18836.4	1276	Rj2 protein	Medtr6g078630.1_disease_resistance_protein_(TIR-NBS-LRR_class)_HC_chr6:29530050-29528847_20140818
256.995	106998_t	1098	serine/threonine-protein kinase SAPK2	Medtr5g064540.1_Serine/Threonine-kinase_SAPK1-like_protein_HC_chr5:27108263-27103767_20140818
27.1127	MSTRG.81905.9	403	structural maintenance-like chromosomes-protein	Medtr3g033470.1_structural_maintenance-like_chromosomes-protein_HC_chr3:10689887-10707051_20140818
110.174	MSTRG.2774.1	951	thioredoxin M-type protein	Medtr8g059015.1_thioredoxin_M-type_protein_HC_chr8:20541253-20543952_20140818
67.6774	153404_t	5541	TMV resistance protein N-like	Medtr8g075440.1_disease_resistance_protein_(TIR-NBS-LRR_class)_HC_chr8:31903618-31908853_20140818
102.914	MSTRG.6029.1	1870	toll-interleukin-resistance (TIR) domain protein	Medtr6g036510.1_toll-interleukin-resistance_(TIR)_domain_protein_LC_chr6:12786739-12784326_20140818
40.7989	115314_t	1224	transmembrane protein, putative	Medtr6g078770.1_transmembrane_protein,_putative_HC_chr6:29607965-29613244_20140818
71.8545	MSTRG.18834.1	1311	transmembrane protein, putative	Medtr6g078770.1_transmembrane_protein,_putative_HC_chr6:29607965-29613244_20140818
39.0378	178181_t	1224	transmembrane protein, putative	Medtr6g078770.1_transmembrane_protein,_putative_HC_chr6:29607965-29613244_20140818
75.8631	2604_t	1197	transmembrane protein, putative	Medtr6g078770.1_transmembrane_protein,_putative_HC_chr6:29607965-29613244_20140818
85.9082	MSTRG.24590.1	2163	transmembrane protein, putative	Medtr1g105765.1_transmembrane_protein,_putative_HC_chr1:47722495-47723773_20140818
39.8349	MSTRG.28121.4	426	tyrosine kinase family protein	Medtr6g082890.1_tyrosine_kinase_family_protein_HC_chr6:30965021-30962641_20140818
62.7667	MSTRG.25349.7	1682	tyrosine kinase family protein	Medtr3g067795.1_tyrosine_kinase_family_protein_HC_chr3:30419973-30424611_20140818
383.1	MSTRG.64323.2	2102	ubiquitin family protein	Medtr1g012210.1_ubiquitin_family_protein_LC_chr1:2382883-2382131_20140818
150.887	MSTRG.83941.8	1937	ubiquitin-activating enzyme E1 1	Medtr5g072480.1_ubiquitin-activating_enzyme_E1_1_HC_chr5:30842736-30830993_20140818
220.128	110376_t	690	ubiquitin-conjugating enzyme E2 35	Medtr2g078010.4_ubiquitin-conjugating_enzyme_HC_chr2:32320407-32326653_20140818
41.4924	6845_t	1581	wall-associated receptor kinase-like 2	Medtr7g079350.1_LysM_type_receptor_kinase_HC_chr7:30114251-30117480_20140818
307.562	95019_t	885	wall-associated receptor kinase-like protein	Medtr3g069050.1_wall-associated_receptor_kinase-like_protein_HC_chr3:30907066-30911410_20140818

## Sheet: Table S4.4. GO enrichment
Supporting information Table S4.4. Enrichment analyses of control DETs data sets of cv. MNGNR-16 and cv. Baker.
GO_accession	Ontology	Term description	queryitem	querytotal	bgitem	bgtotal	pvalue	FDR	entries\
DETs expressed in cv. MNGRN-16
GO:0006952	P	defense response	76	513	799	18883	3.2e-20	1.9e-17	// Medtr7g078180 // Medtr3g056585 // Medtr7g018850 // Medtr8g032830 // Medtr6g079140 // Medtr3g062340 // Medtr2g035100 // Medtr3g455910 // Medtr6g072320 // Medtr4g022480 // Medtr3g006280 // Medtr3g055720 // Medtr8g028520 // Medtr5g071610 // Medtr4g020700 // Medtr1g007300 // Medtr3g062320 // Medtr5g028750 // Medtr6g071935 // Medtr4g021057 // Medtr0007s0140 // Medtr4g015030 // Medtr6g015730 // Medt…
GO:0006950	P	response to stress	83	513	1087	18883	1.2e-16	3.6e-14	// Medtr7g078180 // Medtr3g435720 // Medtr3g056585 // Medtr7g018850 // Medtr8g032830 // Medtr6g079140 // Medtr3g062340 // Medtr2g035100 // Medtr1g075340 // Medtr3g455910 // Medtr6g072320 // Medtr4g022480 // Medtr3g006280 // Medtr3g055720 // Medtr3g451650 // Medtr5g071610 // Medtr5g083860 // Medtr4g020700 // Medtr1g007300 // Medtr3g062320 // Medtr3g435040 // Medtr6g071935 // Medtr4g021057 // Medtr…
GO:0050896	P	response to stimulus	83	513	1164	18883	4.7e-15	9.3e-13	// Medtr7g078180 // Medtr3g435720 // Medtr3g056585 // Medtr7g018850 // Medtr8g032830 // Medtr6g079140 // Medtr3g062340 // Medtr2g035100 // Medtr1g075340 // Medtr3g455910 // Medtr6g072320 // Medtr4g022480 // Medtr3g006280 // Medtr3g055720 // Medtr3g451650 // Medtr5g071610 // Medtr5g083860 // Medtr4g020700 // Medtr1g007300 // Medtr3g062320 // Medtr3g435040 // Medtr6g071935 // Medtr4g021057 // Medtr…
GO:0007165	P	signal transduction	41	513	644	18883	1.1e-06	0.00016	// Medtr8g032830 // Medtr6g088250 // Medtr6g036510 // Medtr6g072320 // Medtr3g006280 // Medtr2g022200 // Medtr5g071610 // Medtr4g020700 // Medtr1g007300 // Medtr4g080777 // Medtr6g071935 // Medtr4g021057 // Medtr4g015030 // Medtr1g040810 // Medtr0019s0100 // Medtr2g100370 // Medtr6g472300 // Medtr1g090717 // Medtr7g078180 // Medtr3g058880 // Medtr6g079140 // Medtr6g069560 // Medtr7g072605 // Medt…
GO:0023046	P	signaling process	42	513	719	18883	6e-06	0.0006	// Medtr8g032830 // Medtr6g088250 // Medtr6g036510 // Medtr6g072320 // Medtr3g006280 // Medtr2g022200 // Medtr5g071610 // Medtr4g020700 // Medtr1g007300 // Medtr4g080777 // Medtr6g071935 // Medtr4g021057 // Medtr4g015030 // Medtr1g040810 // Medtr0019s0100 // Medtr2g100370 // Medtr6g472300 // Medtr1g090717 // Medtr7g078180 // Medtr3g058880 // Medtr6g079140 // Medtr6g069560 // Medtr7g072605 // Medt…
GO:0023060	P	signal transmission	42	513	719	18883	6e-06	0.0006	// Medtr8g032830 // Medtr6g088250 // Medtr6g036510 // Medtr6g072320 // Medtr3g006280 // Medtr2g022200 // Medtr5g071610 // Medtr4g020700 // Medtr1g007300 // Medtr4g080777 // Medtr6g071935 // Medtr4g021057 // Medtr4g015030 // Medtr1g040810 // Medtr0019s0100 // Medtr2g100370 // Medtr6g472300 // Medtr1g090717 // Medtr7g078180 // Medtr3g058880 // Medtr6g079140 // Medtr6g069560 // Medtr7g072605 // Medt…
GO:0023052	P	signaling	42	513	751	18883	1.6e-05	0.0014	// Medtr8g032830 // Medtr6g088250 // Medtr6g036510 // Medtr6g072320 // Medtr3g006280 // Medtr2g022200 // Medtr5g071610 // Medtr4g020700 // Medtr1g007300 // Medtr4g080777 // Medtr6g071935 // Medtr4g021057 // Medtr4g015030 // Medtr1g040810 // Medtr0019s0100 // Medtr2g100370 // Medtr6g472300 // Medtr1g090717 // Medtr7g078180 // Medtr3g058880 // Medtr6g079140 // Medtr6g069560 // Medtr7g072605 // Medt…
GO:0016818	F	hydrolase activity, acting on acid anhydrides, in phosphorus-containing anhydrides	56	513	1071	18883	4.2e-06	0.00052	// Medtr1g051585 // Medtr8g045110 // Medtr2g035840 // Medtr4g094060 // Medtr8g032830 // Medtr3g107420 // Medtr7g076820 // Medtr8g090000 // Medtr6g072320 // Medtr4g020590 // Medtr1g061970 // Medtr4g020700 // Medtr6g009520 // Medtr4g021057 // Medtr8g044260 // Medtr1g080600 // Medtr8g013910 // Medtr2g438110 // Medtr1g084020 // Medtr4g015030 // Medtr1g495705 // Medtr6g472300 // Medtr1g011650 // Medtr…
GO:0016817	F	hydrolase activity, acting on acid anhydrides	57	513	1086	18883	3e-06	0.00052	// Medtr1g051585 // Medtr8g045110 // Medtr2g035840 // Medtr4g094060 // Medtr8g032830 // Medtr3g107420 // Medtr7g076820 // Medtr8g090000 // Medtr6g072320 // Medtr4g020590 // Medtr1g061970 // Medtr4g020700 // Medtr6g009520 // Medtr4g021057 // Medtr1g112870 // Medtr8g044260 // Medtr1g080600 // Medtr8g013910 // Medtr2g438110 // Medtr1g084020 // Medtr4g015030 // Medtr1g495705 // Medtr6g472300 // Medtr…
GO:0016462	F	pyrophosphatase activity	56	513	1061	18883	3.2e-06	0.00052	// Medtr1g051585 // Medtr8g045110 // Medtr2g035840 // Medtr4g094060 // Medtr8g032830 // Medtr3g107420 // Medtr7g076820 // Medtr8g090000 // Medtr6g072320 // Medtr4g020590 // Medtr1g061970 // Medtr4g020700 // Medtr6g009520 // Medtr4g021057 // Medtr8g044260 // Medtr1g080600 // Medtr8g013910 // Medtr2g438110 // Medtr1g084020 // Medtr4g015030 // Medtr1g495705 // Medtr6g472300 // Medtr1g011650 // Medtr…
GO:0017111	F	nucleoside-triphosphatase activity	56	513	1048	18883	2.2e-06	0.00052	// Medtr1g051585 // Medtr8g045110 // Medtr2g035840 // Medtr4g094060 // Medtr8g032830 // Medtr3g107420 // Medtr7g076820 // Medtr8g090000 // Medtr6g072320 // Medtr4g020590 // Medtr1g061970 // Medtr4g020700 // Medtr6g009520 // Medtr4g021057 // Medtr8g044260 // Medtr1g080600 // Medtr8g013910 // Medtr2g438110 // Medtr1g084020 // Medtr4g015030 // Medtr1g495705 // Medtr6g472300 // Medtr1g011650 // Medtr…
GO:0016787	F	hydrolase activity	108	513	2748	18883	5.8e-05	0.0058	// Medtr5g088337 // Medtr3g075230 // Medtr6g072320 // Medtr1g019480 // Medtr7g080180 // Medtr4g021057 // Medtr1g112870 // Medtr2g062990 // Medtr1g080600 // Medtr8g013910 // Medtr1g084020 // Medtr4g031220 // Medtr1g011650 // Medtr3g104720 // Medtr7g050980 // Medtr7g070070 // Medtr4g016920 // Medtr1g060090 // Medtr1g021020 // Medtr1g102670 // Medtr8g101950 // Medtr8g098230 // Medtr1g101870 // Medtr…
DETs expressed in cv. Baker
GO:0016787	F	hydrolase activity	127	561	2748	18883	3.4e-07	0.00018	// Medtr4g021520 // Medtr4g134760 // Medtr1g081800 // Medtr3g118390 // Medtr1g106200 // Medtr8g013910 // Medtr4g031220 // Medtr4g132870 // Medtr3g452710 // Medtr7g086030 // Medtr5g062370 // Medtr7g081420 // Medtr1g102670 // Medtr5g024340 // Medtr6g086510 // Medtr8g015510 // Medtr5g062430 // Medtr3g008760 // Medtr1g101870 // Medtr8g079250 // Medtr3g074930 // Medtr1g088020 // Medtr4g045853 // Medtr…
GO:0016798	F	hydrolase activity, acting on glycosyl bonds	29	561	391	18883	1.5e-05	0.0038	// Medtr4g015460 // Medtr4g134760 // Medtr1g018200 // Medtr4g083660 // Medtr8g010110 // Medtr4g059680 // Medtr3g118390 // Medtr1g106200 // Medtr2g100110 // Medtr4g031220 // Medtr1g082890 // Medtr7g024420 // Medtr5g062320 // Medtr6g088320 // Medtr7g086030 // Medtr8g074330 // Medtr8g010080 // Medtr5g062370 // Medtr7g084750 // Medtr4g101630 // Medtr4g066580 // Medtr5g062430 // Medtr1g087240 // Medtr…
[truncated: 1 more rows]

## Sheet: Table S4.5. R genes
Supporting information Table S4.5. Differentially expressed putative R genes in both control cv. MNGRN-16 and cv. Baker, respectively.
[truncated: 252 more rows]

## Sheet: Table S4.6. TFs
Supporting information Table S4.6. Differentially expressed transcription factors (TFs) in both control cv. MNGRN-16 and cv. Baker, respectively.
[truncated: 102 more rows]
