# Supplementary material for: Cellular and Transcriptional Responses of Resistant and Susceptible Cultivars of Alfalfa to the Root Lesion Nematode, Pratylenchus penetrans
Source: Front Plant Sci. 2019 Jul 31;10:971. doi: 10.3389/fpls.2019.00971 (PMC6685140; doi:10.3389/fpls.2019.00971)
Supplement: Supplementary file 5 [file Table_5.XLSX]

## Sheet: Table S5.1. DETs
Supporting information Table S5.1. Inter-cultivar differences (cv. MNGRN-16 vs. Baker) in transcript expression under Pratylenchus penetrans infection.
baseMean	log2 Fold Change	pvalue	padj	ID (this study)	Sequence Length	Sequence Description NCBI	Sequence description & ID, Medicago truncatula
538.984	8.733	1.3e-24	1.83e-20	MSTRG.72718.1	1105	hypothetical protein L195_g034788 [Trifolium pratense]	Medtr4g059830.1_hypothetical_protein_HC_chr4:22065876-22065212_20140818
338.752	8.19538	7.55e-13	1.02e-09	187112_t	1860	NYN domain protein [Medicago truncatula]/gi	Medtr3g050240.1_NYN_domain_protein_LC_chr3:19796298-19799980_20140818
228.345	8.12359	1.4e-12	1.74e-09	MSTRG.25180.10	1057	NYN domain protein [Medicago truncatula]/gi	Medtr3g050240.1_NYN_domain_protein_LC_chr3:19796298-19799980_20140818
330.728	8.07611	1.38e-12	1.74e-09	MSTRG.39271.2	1244	NYN domain protein [Medicago truncatula]/gi	Medtr3g050240.1_NYN_domain_protein_LC_chr3:19796298-19799980_20140818
226.761	8.07555	6.88e-13	9.44e-10	MSTRG.25180.9	1038	NYN domain protein [Medicago truncatula]/gi	Medtr3g050240.1_NYN_domain_protein_LC_chr3:19796298-19799980_20140818
134.413	7.91648	3.1e-09	1.35e-06	MSTRG.25180.5	1185	NYN domain protein [Medicago truncatula]/gi	Medtr3g050240.1_NYN_domain_protein_LC_chr3:19796298-19799980_20140818
3256.15	7.84695	1.11e-06	0.000184506	MSTRG.74865.2	919	---NA---	Medtr5g039960.1_transmembrane_protein,_putative_LC_chr5:17590405-17589548_20140818
3643.87	7.84095	1.12e-06	0.000186565	MSTRG.74865.1	1494	---NA---	Medtr5g039960.1_transmembrane_protein,_putative_LC_chr5:17590405-17589548_20140818
369.116	7.83904	5.52e-10	3.11e-07	MSTRG.39271.3	1260	NYN domain protein [Medicago truncatula]/gi	Medtr3g050240.1_NYN_domain_protein_LC_chr3:19796298-19799980_20140818
112.365	7.71325	0.000210843	0.00986534	MSTRG.86094.1	6529	ribonuclease H partial [Trifolium pratense]	Medtr1g026690.1_hypothetical_protein_LC_chr1:8719475-8720704_20140818
171.967	7.68022	1.54e-19	1.19e-15	MSTRG.72851.1	379	---NA---	---NA---
494.459	7.50209	8.6e-10	4.53e-07	MSTRG.83882.2	938	---NA---	---NA---
342.966	7.43589	2.83e-11	2.38e-08	MSTRG.39271.4	1129	NYN domain protein [Medicago truncatula]/gi	Medtr3g050240.1_NYN_domain_protein_LC_chr3:19796298-19799980_20140818
91.6763	7.40077	0.000321129	0.0133525	154242_t	5889	ribonuclease H partial [Trifolium pratense]	Medtr1g026690.1_hypothetical_protein_LC_chr1:8719475-8720704_20140818
206.003	7.23836	2.97e-11	2.49e-08	104198_t	1770	NYN domain protein [Medicago truncatula]/gi	Medtr3g050240.1_NYN_domain_protein_LC_chr3:19796298-19799980_20140818
535.626	7.17244	6.49e-08	1.85e-05	MSTRG.25180.3	1275	NYN domain protein [Medicago truncatula]/gi	Medtr3g050240.1_NYN_domain_protein_LC_chr3:19796298-19799980_20140818
319.424	6.73343	1.79e-14	3.79e-11	MSTRG.37267.2	1052	---NA---	---NA---
67.3791	6.64273	1.71e-11	1.54e-08	90670_t	1752	ATP-dependent DNA helicase PIF1 partial [Trifolium pratense]	Medtr7g022020.1_PIF1-like_helicase_LC_chr7:7038991-7036186_20140818
44.0878	6.40388	4.44e-15	1.08e-11	MSTRG.38868.1	236	---NA---	---NA---
90.6712	6.17315	1.53e-10	1.03e-07	MSTRG.52176.1	2081	hypothetical protein MTR_0200s0020 [Medicago truncatula]/gi	Medtr0200s0020.1_hypothetical_protein_LC_scaffold0200:18198-19518_20140818
59.9329	6.14739	7.27e-15	1.66e-11	52004_t	1752	ATP-dependent DNA helicase PIF1 partial [Trifolium pratense]	Medtr7g022020.1_PIF1-like_helicase_LC_chr7:7038991-7036186_20140818
550.172	6.07729	4.14e-08	1.28e-05	MSTRG.49016.1	810	hypothetical protein L195_g034788 [Trifolium pratense]	Medtr3g461430.1_transmembrane_amino_acid_transporter_family_protein_HC_chr3:24400345-24405292_20140818
205.92	6.03327	1.88e-12	2.29e-09	MSTRG.82288.3	1916	adenine nucleotide alpha hydrolase superfamily protein [Medicago truncatula]/gi	Medtr1g054765.1_adenine_nucleotide_alpha_hydrolase_superfamily_protein_HC_chr1:23937943-23936722_20140818
2827.64	5.91004	2.11e-06	0.00030368	MSTRG.17314.2	1044	transmembrane protein putative [Medicago truncatula]/gi	Medtr2g083950.1_transmembrane_protein,_putative_LC_chr2:35242657-35243825_20140818
3020.82	5.87379	1.13e-06	0.000186565	MSTRG.17314.1	1084	transmembrane protein putative [Medicago truncatula]/gi	Medtr2g083950.1_transmembrane_protein,_putative_LC_chr2:35242657-35243825_20140818
94.7406	5.80407	1.38e-09	6.72e-07	MSTRG.24158.2	1899	hypothetical protein MTR_0200s0020 [Medicago truncatula]/gi	Medtr0200s0020.1_hypothetical_protein_LC_scaffold0200:18198-19518_20140818
76.0288	5.72025	1.66e-22	1.84e-18	MSTRG.37927.2	1474	transmembrane protein putative [Medicago truncatula]/gi	Medtr1412s0010.1_transmembrane_protein,_putative_LC_scaffold1412:564-27_20140818
145.678	5.67276	8.59e-08	2.34e-05	MSTRG.56176.1	1384	arginase family protein [Medicago truncatula]/gi	Medtr0088s0100.1_arginase_family_protein_HC_scaffold0088:46289-49776_20140818
191.24	5.44777	1.07e-12	1.42e-09	MSTRG.72562.4	2580	glycoside hydrolase family 1 protein [Medicago truncatula]/gi	Medtr4g081530.1_glycoside_hydrolase_family_1_protein_HC_chr4:31637194-31641130_20140818
35.5459	5.44551	1.09e-09	5.51e-07	MSTRG.82604.1	857	---NA---	---NA---
56.6006	5.34429	4.82e-11	3.85e-08	MSTRG.72562.3	2342	glycoside hydrolase family 1 protein [Medicago truncatula]/gi	Medtr4g081530.1_glycoside_hydrolase_family_1_protein_HC_chr4:31637194-31641130_20140818
134.303	5.33466	8.23e-12	8.02e-09	MSTRG.72562.2	2243	glycoside hydrolase family 1 protein [Medicago truncatula]/gi	Medtr4g081530.1_glycoside_hydrolase_family_1_protein_HC_chr4:31637194-31641130_20140818
147.657	5.25648	1.59e-05	0.00146872	191159_t	936	NYN domain protein [Medicago truncatula]/gi	Medtr3g050240.1_NYN_domain_protein_LC_chr3:19796298-19799980_20140818
232.369	5.21585	4.13e-12	4.58e-09	MSTRG.72562.6	2429	glycoside hydrolase family 1 protein [Medicago truncatula]/gi	Medtr4g081530.1_glycoside_hydrolase_family_1_protein_HC_chr4:31637194-31641130_20140818
211.553	5.21169	6.72e-13	9.29e-10	MSTRG.72562.5	2521	glycoside hydrolase family 1 protein [Medicago truncatula]/gi	Medtr4g081530.1_glycoside_hydrolase_family_1_protein_HC_chr4:31637194-31641130_20140818
185.582	5.1931	7.46e-12	7.36e-09	MSTRG.54334.4	2084	O-fucosyltransferase family protein [Medicago truncatula]/gi	Medtr5g042200.1_O-fucosyltransferase_family_protein_HC_chr5:18563089-18558307_20140818
139.491	5.18514	1.62e-05	0.00148548	MSTRG.34987.2	585	NYN domain protein [Medicago truncatula]/gi	Medtr3g050240.1_NYN_domain_protein_LC_chr3:19796298-19799980_20140818
135.249	5.10934	0.000356864	0.014435	MSTRG.60434.1	311	---NA---	---NA---
153.851	5.07103	0.000716716	0.0232992	MSTRG.60434.2	320	---NA---	---NA---
2781.18	5.05922	0.00104598	0.0300139	MSTRG.85887.2	1150	transmembrane protein putative [Medicago truncatula]/gi	Medtr2g083950.1_transmembrane_protein,_putative_LC_chr2:35242657-35243825_20140818
48.5878	5.04345	7.45e-12	7.36e-09	MSTRG.82288.16	1940	adenine nucleotide alpha hydrolase superfamily protein [Medicago truncatula]/gi	Medtr1g054765.1_adenine_nucleotide_alpha_hydrolase_superfamily_protein_HC_chr1:23937943-23936722_20140818
57.7029	5.03846	6.25e-06	0.000709762	MSTRG.86915.3	1283	kinesin-like protein KIF11-like [Trifolium pratense]	Medtr1g075680.1_kinesin_motor_domain_protein_HC_chr1:33531344-33535102_20140818
44.7758	5.01899	2.51e-10	1.57e-07	MSTRG.19696.1	1078	---NA---	---NA---
36.9932	4.99351	3.63e-09	1.55e-06	MSTRG.47629.1	282	---NA---	---NA---
49.9729	4.9639	3.43e-06	0.000445859	MSTRG.38056.4	859	disease resistance protein RGA4 [Medicago truncatula]/gi	Medtr5g071670.1_disease_resistance_protein_RGA4_HC_chr5:30437409-30429659_20140818
53.8863	4.95535	2.74e-09	1.22e-06	58948_t	1179	hypothetical protein L195_g059782 partial [Trifolium pratense]	Medtr4g116110.1_hypothetical_protein_LC_chr4:48012658-48012990_20140818
177.498	4.95378	4.83e-12	5.26e-09	MSTRG.75555.3	262	---NA---	---NA---
56.2713	4.89367	1.57e-05	0.00145382	MSTRG.86915.2	1235	kinesin-like protein KIF11-like [Trifolium pratense]	Medtr1g075680.1_kinesin_motor_domain_protein_HC_chr1:33531344-33535102_20140818
207.898	4.82886	1.2e-15	3.2e-12	MSTRG.48622.1	1112	---NA---	---NA---
45.853	4.70669	1.36e-09	6.69e-07	52005_t	3051	ATP-dependent DNA helicase PIF1 [Trifolium pratense]	Medtr7g026957.1_hypothetical_protein_LC_chr7:8994652-8999133_20140818
90.1244	4.61602	1.32e-07	3.34e-05	MSTRG.62816.2	328	---NA---	---NA---
56.6932	4.59797	0.000169428	0.00841285	MSTRG.60434.3	265	---NA---	---NA---
25.3156	4.53511	5.93e-07	0.000109563	MSTRG.63116.1	327	---NA---	---NA---
31.1032	4.52748	1.36e-07	3.41e-05	93816_t	3183	disease resistance protein (TIR-NBS-LRR class) [Medicago truncatula]/gi	Medtr4g014570.1_disease_resistance_protein_(TIR-NBS-LRR_class)_HC_chr4:4130085-4120596_20140818
673.368	4.52531	8.57e-09	3.25e-06	MSTRG.62571.1	391	transmembrane protein putative [Medicago truncatula]/gi	Medtr5g039960.1_transmembrane_protein,_putative_LC_chr5:17590405-17589548_20140818
36.1278	4.51648	4.96e-08	1.49e-05	MSTRG.61739.2	225	---NA---	---NA---
116.903	4.46037	9.42e-06	0.000979637	MSTRG.69094.1	5148	ATP-dependent DNA helicase PIF1 [Trifolium pratense]	Medtr2g089470.1_PIF1-like_helicase_LC_chr2:37822429-37825668_20140818
80.6246	4.43812	0.000353644	0.0143526	10428_t	2160	Pol [Vitis vinifera]	Medtr3g087960.1_hypothetical_protein_LC_chr3:39871645-39873373_20140818
78.9014	4.39252	9.8e-11	7.09e-08	MSTRG.19695.1	1572	---NA---	---NA---
84.3591	4.384	0.000562885	0.0196803	MSTRG.69564.3	395	tRNA (adenine(58)-N(1))-methyltransferase non-catalytic subunit TRM6-like protein partial [Trifolium pratense]	Medtr1g024920.1_tRNA_(guanine-N(1))-methyltransferase,_putative_HC_chr1:7942696-7935263_20140818
83.1011	4.37747	0.000582339	0.0201808	MSTRG.69564.4	383	---NA---	Medtr1g024920.1_tRNA_(guanine-N(1))-methyltransferase,_putative_HC_chr1:7942696-7935263_20140818
35.383	4.34682	4.21e-10	2.48e-07	MSTRG.30565.1	438	MtN26 [Medicago truncatula]/gi	Medtr4g011800.1_MtN26_HC_chr4:2985715-2984165_20140818
98.0944	4.32841	0.0014442	0.0372977	MSTRG.87541.1	288	---NA---	---NA---
149.839	4.3087	5.74e-09	2.29e-06	MSTRG.14320.1	5217	ATP-dependent DNA helicase PIF1 [Trifolium pratense]	Medtr2g089470.1_PIF1-like_helicase_LC_chr2:37822429-37825668_20140818
41.5616	4.29517	4.53e-16	1.35e-12	MSTRG.52033.1	236	---NA---	---NA---
118.619	4.28883	4.14e-07	8.18e-05	MSTRG.84591.2	1541	PREDICTED: NAD(P)H-dependent 6'-deoxychalcone synthase-like [Cicer arietinum]	Medtr3g083130.1_aldo/keto_reductase_family_oxidoreductase_HC_chr3:37505830-37503715_20140818
175.204	4.2863	0.00197269	0.046019	MSTRG.6580.1	283	---NA---	---NA---
208.232	4.25625	3.76e-10	2.25e-07	MSTRG.9198.5	1344	unknown [Medicago truncatula]/gi	Medtr4g021410.1_aldo/keto_reductase_family_oxidoreductase_HC_chr4:6956705-6962668_20140818
79.2584	4.25575	9.49e-06	0.000981617	MSTRG.69094.4	1971	ATP-dependent DNA helicase PIF1 partial [Trifolium pratense]	Medtr8g447120.1_AT_hook_motif_protein,_putative_LC_chr8:18486456-18487766_20140818
103.062	4.2375	6.73e-07	0.000120889	MSTRG.84591.1	1509	PREDICTED: NAD(P)H-dependent 6'-deoxychalcone synthase-like [Cicer arietinum]	Medtr3g083130.1_aldo/keto_reductase_family_oxidoreductase_HC_chr3:37505830-37503715_20140818
95.3169	4.2008	4.37e-07	8.55e-05	MSTRG.62816.1	328	---NA---	---NA---
151.194	4.19586	1.03e-08	3.84e-06	MSTRG.14320.4	4095	ATP-dependent DNA helicase PIF1 [Trifolium pratense]	Medtr2g089470.1_PIF1-like_helicase_LC_chr2:37822429-37825668_20140818
107.976	4.15832	4.02e-19	2.39e-15	MSTRG.63173.20	1905	PREDICTED: uncharacterized protein LOC101507086 [Cicer arietinum]	Medtr3g435040.6_LRR_and_NB-ARC_domain_disease_resistance_protein_LC_chr3:11407461-11421317_20140818
84.1778	4.11271	5.87e-12	6.15e-09	MSTRG.23765.1	2214	transmembrane protein putative [Medicago truncatula]/gi	Medtr5g048560.1_transmembrane_protein,_putative_LC_chr5:21253619-21256479_20140818
2987.74	4.06844	0.00165791	0.0410955	MSTRG.58896.8	685	---NA---	---NA---
7126.07	4.04708	0.000161446	0.00811009	MSTRG.58896.11	603	hypothetical protein KK1_048371 [Cajanus cajan]	---NA---
172.484	4.04189	2.95e-07	6.29e-05	MSTRG.9198.13	1149	unknown [Medicago truncatula]/gi	Medtr4g021410.1_aldo/keto_reductase_family_oxidoreductase_HC_chr4:6956705-6962668_20140818
6877.83	4.02933	0.0001334	0.00709946	MSTRG.58896.46	587	hypothetical protein KK1_048371 [Cajanus cajan]	---NA---
34.891	4.01841	4.06e-07	8.08e-05	MSTRG.8602.1	646	---NA---	Medtr4g108010.1_DUF4283_domain_protein_LC_chr4:44771398-44772009_20140818
501.536	4.00046	2.38e-07	5.33e-05	MSTRG.62769.2	2629	replication factor-A carboxy-terminal domain protein [Medicago truncatula]/gi	Medtr2g450060.1_replication_factor-A_carboxy-terminal_domain_protein_LC_chr2:22081675-22078797_20140818
63.1493	3.95098	0.00044862	0.0168488	10427_t	807	hypothetical protein AMTR_s04311p00004950 partial [Amborella trichopoda]	Medtr6g472230.1_disease_resistance_protein_(TIR-NBS-LRR_class),_putative_LC_chr6:26054240-26059623_20140818
3460.04	3.94667	0.00165038	0.0409684	MSTRG.58896.1	576	---NA---	---NA---
2707.5	3.93	0.00078228	0.0246426	MSTRG.58896.50	616	---NA---	---NA---
68.96	3.92944	6.85e-06	0.00076156	MSTRG.79598.2	1015	glycoside hydrolase family 1 protein [Medicago truncatula]/gi	Medtr4g081530.1_glycoside_hydrolase_family_1_protein_HC_chr4:31637194-31641130_20140818
195.22	3.9207	0.00107612	0.0305562	MSTRG.753.2	1535	---NA---	Medtr2g026240.1_transmembrane_protein,_putative_LC_chr2:9562121-9560946_20140818
56.3171	3.91063	0.000102279	0.00582759	MSTRG.52137.1	479	---NA---	---NA---
48.4791	3.89104	2.92e-07	6.25e-05	MSTRG.36463.1	585	hypothetical protein MTR_6g034890 [Medicago truncatula]/gi	Medtr6g034890.1_hypothetical_protein_HC_chr6:12188629-12189045_20140818
99.3691	3.86792	7.43e-05	0.00460286	MSTRG.84591.5	1460	PREDICTED: NAD(P)H-dependent 6'-deoxychalcone synthase-like [Cicer arietinum]	Medtr3g083130.1_aldo/keto_reductase_family_oxidoreductase_HC_chr3:37505830-37503715_20140818
244.103	3.85786	1.46e-06	0.000228588	164310_t	1611	replication factor-A carboxy-terminal domain protein [Medicago truncatula]/gi	Medtr2g450060.1_replication_factor-A_carboxy-terminal_domain_protein_LC_chr2:22081675-22078797_20140818
211.152	3.8566	2.19e-06	0.000313295	MSTRG.9889.37	739	proline-rich protein [Glycine max]	---NA---
38.7197	3.83016	2.19e-14	4.36e-11	MSTRG.63173.1	1160	LRR and NB-ARC domain disease resistance protein [Medicago truncatula]/gi	Medtr3g435040.8_LRR_and_NB-ARC_domain_disease_resistance_protein_LC_chr3:11407461-11420261_20140818
32.7711	3.81788	9.54e-06	0.000985246	MSTRG.88330.1	1383	hypothetical protein TSUD_111590 [Trifolium subterraneum]	Medtr2g100000.2_beta-like_galactosidase_HC_chr2:42908368-42922742_20140818
122.17	3.80563	5.57e-12	5.91e-09	MSTRG.84591.3	1553	PREDICTED: NAD(P)H-dependent 6'-deoxychalcone synthase-like [Cicer arietinum]	Medtr3g083130.1_aldo/keto_reductase_family_oxidoreductase_HC_chr3:37505830-37503715_20140818
79.8883	3.79478	6.26e-05	0.00405713	MSTRG.42136.1	572	hypothetical protein MTR_1g056930 [Medicago truncatula]/gi	Medtr1g056930.1_hypothetical_protein_LC_chr1:24926850-24927116_20140818
35.5049	3.79127	2.79e-06	0.00038181	MSTRG.37734.7	244	---NA---	---NA---
117.695	3.78914	1.28e-18	6.64e-15	MSTRG.9198.9	1278	PREDICTED: aldo-keto reductase family 4 member C10-like [Cicer arietinum]/gi	Medtr4g021410.1_aldo/keto_reductase_family_oxidoreductase_HC_chr4:6956705-6962668_20140818
51.7266	3.78895	4.24e-09	1.78e-06	MSTRG.43798.4	2114	WNK kinase [Medicago truncatula]/gi	Medtr8g093090.2_WNK_kinase_HC_chr8:38904456-38908200_20140818
35.3957	3.78891	6.53e-11	5.05e-08	MSTRG.88515.1	1204	hypothetical protein MTR_2g054850 [Medicago truncatula]/gi	Medtr2g054850.1_hypothetical_protein_HC_chr2:23460709-23459515_20140818
53.204	3.78309	0.00014619	0.00753583	MSTRG.8560.1	275	---NA---	---NA---
36.4133	3.7765	2.95e-06	0.000397133	MSTRG.88584.4	708	---NA---	---NA---
27.235	3.74582	3.34e-08	1.06e-05	167719_t	5175	hypothetical protein TSUD_132210 [Trifolium subterraneum]	Medtr0259s0030.1_hypothetical_protein_LC_scaffold0259:11612-11974_20140818
108.988	3.73451	0.000108599	0.00608256	MSTRG.89142.3	2619	glycoside hydrolase family 1 protein [Medicago truncatula]/gi	Medtr4g081530.1_glycoside_hydrolase_family_1_protein_HC_chr4:31637194-31641130_20140818
45.0981	3.7309	1.22e-06	0.000198319	2101_t	1989	plant phospholipase-like protein [Medicago truncatula]/gi	Medtr8g089500.1_plant_phospholipase-like_protein_HC_chr8:37204184-37202286_20140818
93.1446	3.71648	0.00216781	0.0489779	3591_t	2097	zinc finger BED domain-containing protein RICESLEEPER 2-like [Dorcoceras hygrometricum]	Medtr4g036325.1_hypothetical_protein_LC_chr4:13081348-13082899_20140818
61.8616	3.71106	1.47e-12	1.82e-09	137129_t	918	PREDICTED: trafficking protein particle complex subunit 1 [Cicer arietinum]/gi	Medtr8g095450.1_trafficking_protein_particle_complex_subunit-like_protein_HC_chr8:39949424-39945171_20140818
43.0091	3.70931	2.24e-09	1.03e-06	MSTRG.38372.2	1237	hypothetical protein MTR_5g078270 [Medicago truncatula]/gi	Medtr5g078270.1_hypothetical_protein_HC_chr5:33448201-33449853_20140818
63.6559	3.68423	0.000103356	0.00586093	MSTRG.78608.3	1171	uncharacterized protein LOC107613253 isoform X2 [Arachis ipaensis]	Medtr5g061300.1_hypothetical_protein_LC_chr5:25477205-25475100_20140818
28.9976	3.66229	0.000176947	0.00868598	168184_t	1751	unknown [Medicago truncatula]/gi	Medtr0026s0010.1_phloem_protein_HC_scaffold0026:6297-2153_20140818
60.3347	3.65934	4.53e-05	0.00320791	153624_t	1473	methyltransferase PMT16 putative [Medicago truncatula]/gi	Medtr7g076150.2_methyltransferase_PMT16,_putative_HC_chr7:28629548-28623929_20140818
36.6777	3.64677	8.06e-05	0.00488414	MSTRG.76898.1	1209	---NA---	---NA---
79.8462	3.58596	0.000195906	0.00936731	MSTRG.89142.2	2705	glycoside hydrolase family 1 protein [Medicago truncatula]/gi	Medtr4g081530.1_glycoside_hydrolase_family_1_protein_HC_chr4:31637194-31641130_20140818
175.346	3.56237	1.23e-16	4.22e-13	128875_t	3978	DUF4283 domain protein [Medicago truncatula]/gi	Medtr7g445700.1_DUF4283_domain_protein_LC_chr7:15486160-15484152_20140818
43.1406	3.55033	2.64e-05	0.00215665	63939_t	1281	PREDICTED: DEAD-box ATP-dependent RNA helicase 38 [Cicer arietinum]	Medtr1g061970.1_DEAD-box_ATP-dependent_RNA_helicase-like_protein_HC_chr1:27069344-27076281_20140818
52.6394	3.54326	5.64e-07	0.000105243	MSTRG.55065.1	579	hypothetical protein MTR_6g034890 [Medicago truncatula]/gi	Medtr6g034890.1_hypothetical_protein_HC_chr6:12188629-12189045_20140818
24.8407	3.53858	0.000102145	0.00582211	MSTRG.64107.3	597	hypothetical protein MTR_3g117530 [Medicago truncatula]/gi	Medtr3g117530.2_hypothetical_protein_HC_chr3:55027750-55029166_20140818
31.8785	3.52049	5.42e-06	0.000639683	MSTRG.21178.3	487	---NA---	Medtr3g012250.1_disease_resistance_protein_(CC-NBS-LRR_class)_family_protein_HC_chr3:3311630-3307751_20140818
31.0618	3.5142	0.000433414	0.0164653	MSTRG.66994.2	301	---NA---	Medtr6g090535.1_arabinogalactan_protein_HC_chr6:34411665-34410320_20140818
266.576	3.50485	1.19e-08	4.33e-06	MSTRG.25625.1	892	hypothetical protein MTR_3g466590 [Medicago truncatula]/gi	Medtr3g466590.1_hypothetical_protein_LC_chr3:27376193-27381419_20140818
25.2855	3.50257	0.000934375	0.0278161	15345_t	3327	Pol [Coffea arabica]	Medtr6g472230.1_disease_resistance_protein_(TIR-NBS-LRR_class),_putative_LC_chr6:26054240-26059623_20140818
129.453	3.48917	0.000459026	0.0171141	MSTRG.78608.1	2406	uncharacterized protein LOC107613253 isoform X1 [Arachis ipaensis]	Medtr3g448670.1_hypothetical_protein_LC_chr3:16368644-16367948_20140818
49.4559	3.4793	1.92e-08	6.59e-06	MSTRG.43798.1	2434	WNK kinase [Medicago truncatula]/gi	Medtr8g093090.1_WNK_kinase_HC_chr8:38904786-38908148_20140818
90.1571	3.46633	1.69e-11	1.53e-08	MSTRG.58895.8	789	hypothetical protein PHAVU_009G211300g partial [Phaseolus vulgaris]/gi	---NA---
35.592	3.45108	1.55e-08	5.42e-06	MSTRG.30270.2	546	transmembrane protein putative [Medicago truncatula]/gi	Medtr1412s0010.1_transmembrane_protein,_putative_LC_scaffold1412:564-27_20140818
51.0164	3.42912	4.77e-07	9.2e-05	MSTRG.63214.1	2416	unknown [Medicago truncatula]	Medtr5g048560.1_transmembrane_protein,_putative_LC_chr5:21253619-21256479_20140818
53.078	3.41292	1.9e-06	0.000280787	MSTRG.30543.1	4711	drug resistance transporter-like ABC domain protein [Medicago truncatula]/gi	Medtr4g011640.1_drug_resistance_transporter-like_ABC_domain_protein_HC_chr4:2903046-2892454_20140818
35.3174	3.39874	6.66e-06	0.000746276	MSTRG.64107.2	1108	hypothetical protein MTR_3g117530 [Medicago truncatula]/gi	Medtr3g117530.2_hypothetical_protein_HC_chr3:55027750-55029166_20140818
75.8535	3.37311	0.00051089	0.0183596	111284_t	1980	uncharacterized protein LOC107613253 isoform X1 [Arachis ipaensis]	Medtr3g448670.1_hypothetical_protein_LC_chr3:16368644-16367948_20140818
24.6531	3.36748	0.000161723	0.00811613	MSTRG.42891.1	303	---NA---	Medtr1g037410.1_hypothetical_protein_LC_chr1:13801475-13799624_20140818
134.918	3.35909	0.000689132	0.0227104	MSTRG.29788.1	2526	ribonuclease H [Trifolium pratense]	Medtr7g111367.1_reverse_transcriptase,_putative_LC_chr7:45714609-45713248_20140818
82.3567	3.35193	0.000127398	0.00687451	MSTRG.5200.2	1333	aconitate hydratase 1-like isoform X2 [Hevea brasiliensis]	Medtr2g088360.1_cytoplasmic-like_aconitate_hydratase_HC_chr2:37230917-37240757_20140818
25.5852	3.3429	0.000476865	0.0175188	MSTRG.64229.1	719	---NA---	---NA---
51.1598	3.32728	2.83e-06	0.000384741	145604_t	4506	drug resistance transporter-like ABC domain protein [Medicago truncatula]/gi	Medtr4g011640.1_drug_resistance_transporter-like_ABC_domain_protein_HC_chr4:2903046-2892454_20140818
257.373	3.32043	1.46e-05	0.00137304	MSTRG.27565.1	1570	CDP-diacylglycerol-inositol 3-phosphatidyltransferase [Medicago truncatula]/gi	Medtr4g073020.1_CDP-diacylglycerol-inositol_3-phosphatidyltransferase_HC_chr4:27623894-27619241_20140818
33.2886	3.31291	6.85e-05	0.0043397	MSTRG.44802.4	660	---NA---	Medtr6g032995.1_transmembrane_amino_acid_transporter_family_protein_HC_chr6:10305757-10308331_20140818
66.258	3.28893	2.19e-06	0.000313295	MSTRG.5200.1	1398	aconitate hydratase 1-like isoform X2 [Hevea brasiliensis]	Medtr2g088360.1_cytoplasmic-like_aconitate_hydratase_HC_chr2:37230917-37240757_20140818
45.6536	3.28134	4.4e-06	0.000539272	MSTRG.64107.4	1290	hypothetical protein MTR_3g117530 [Medicago truncatula]/gi	Medtr3g117530.2_hypothetical_protein_HC_chr3:55027750-55029166_20140818
762.919	3.27541	0.000716773	0.0232992	MSTRG.67662.9	1170	transmembrane amino acid transporter family protein [Medicago truncatula]/gi	Medtr4g055610.1_transmembrane_amino_acid_transporter_family_protein_HC_chr4:20285002-20289374_20140818
37.5973	3.27519	8.33e-09	3.18e-06	MSTRG.84591.4	1273	suppressor OF protein silencing protein [Medicago truncatula]/gi	Medtr3g098260.1_suppressor_OF_protein_silencing_protein_HC_chr3:44852260-44848884_20140818
29.5454	3.24407	8.18e-05	0.00492962	84937_t	2415	cell division cycle-like protein [Medicago truncatula]/gi	Medtr6g016680.1_cell_division_cycle-like_protein_HC_chr6:6381476-6392651_20140818
151.195	3.23231	1.58e-06	0.000245191	MSTRG.51950.2	670	---NA---	---NA---
56.5273	3.2317	4.11e-09	1.74e-06	MSTRG.76455.1	521	serine/threonine protein phosphatase 2A 55 kDa regulatory subunit B beta-like protein partial [Trifolium pratense]	Medtr2g100370.1_protein_phosphatase_2A_55_kDa_regulatory_subunit_B_HC_chr2:43120098-43128208_20140818
35.4359	3.22766	8.8e-07	0.000151816	176247_t	1920	WNK kinase [Medicago truncatula]/gi	Medtr8g093090.2_WNK_kinase_HC_chr8:38904456-38908200_20140818
59.8409	3.21516	1.43e-05	0.00134504	MSTRG.48026.2	1927	Putative AC transposase [Cajanus cajan]	Medtr4g120840.1_hypothetical_protein_HC_chr4:50046505-50047138_20140818
79.5529	3.2111	1.55e-10	1.04e-07	86266_t	2268	functional resistance protein KR1 putative [Medicago truncatula]/gi	Medtr0019s0100.1_functional_resistance_protein_KR1,_putative_LC_scaffold0019:58637-54816_20140818
57.3607	3.20036	5.32e-07	0.00010091	MSTRG.6871.1	781	---NA---	Medtr5g053210.1_hypothetical_protein_LC_chr5:21924986-21925372_20140818
59.3454	3.19208	9.03e-10	4.71e-07	MSTRG.85508.6	1402	PPR containing plant protein [Medicago truncatula]/gi	Medtr6g024415.1_PPR_containing_plant_protein_LC_chr6:8744390-8743759_20140818
53.9477	3.15552	2.3e-05	0.00194069	MSTRG.48711.1	376	aspartic protease family protein putative [Medicago truncatula]/gi	Medtr5g080330.1_aspartic_protease_family_protein,_putative_LC_chr5:34380900-34377963_20140818
33.2114	3.15081	1.85e-07	4.36e-05	37064_t	1482	cytochrome P450 family 72 protein [Medicago truncatula]/gi	Medtr2g072340.1_cytochrome_P450_family_72_protein_HC_chr2:30434253-30437998_20140818
75.417	3.14832	1.65e-10	1.08e-07	MSTRG.87364.2	794	PREDICTED: serine/threonine protein phosphatase 2A 55 kDa regulatory subunit B beta isoform isoform X1 [Fragaria vesca subsp. vesca]	Medtr1g040810.1_protein_phosphatase_2A_55_kDa_regulatory_subunit_B_HC_chr1:18464856-18466358_20140818
262.461	3.14342	3.52e-05	0.00267404	MSTRG.82288.20	1769	adenine nucleotide alpha hydrolase superfamily protein [Medicago truncatula]/gi	Medtr1g054765.1_adenine_nucleotide_alpha_hydrolase_superfamily_protein_HC_chr1:23937943-23936722_20140818
100.992	3.13547	3.74e-12	4.3e-09	MSTRG.76815.5	1508	PREDICTED: (S)-tetrahydroprotoberberine N-methyltransferase-like isoform X2 [Cicer arietinum]	Medtr2g022200.1_ADP-ribosylation_factor-like_protein_A1D_HC_chr2:7631017-7626899_20140818
33.4983	3.12072	7.03e-05	0.00441795	MSTRG.42771.1	973	---NA---	---NA---
187.458	3.11855	5.43e-06	0.000639683	81979_t	651	albumin-2 protein [Medicago truncatula]/gi	Medtr0807s0020.1_albumin-2_protein_LC_scaffold0807:3562-4708_20140818
32.721	3.1174	2.34e-05	0.00196913	MSTRG.42888.1	346	hypothetical protein MTR_8g467120 [Medicago truncatula]/gi	Medtr8g467120.1_hypothetical_protein_LC_chr8:24033713-24034601_20140818
96.1732	3.1167	3.19e-08	1.02e-05	MSTRG.82025.1	1368	PREDICTED: uncharacterized protein LOC108830220 [Raphanus sativus]	Medtr7g062720.1_Copia-like_polyprotein/retrotransposon,_putative_LC_chr7:22824311-22825240_20140818
60.7201	3.10221	1.28e-05	0.0012358	MSTRG.16491.1	245	albumin-2 protein partial [Medicago truncatula]/gi	Medtr0216s0030.1_albumin-2_protein_LC_scaffold0216:13875-13282_20140818
51.0071	3.09888	5.64e-06	0.000658498	125436_t	1959	NAD(P)-linked oxidoreductase superfamily protein putative isoform 2 [Theobroma cacao]	Medtr4g021450.1_aldo/keto_reductase_family_oxidoreductase_HC_chr4:6976199-6978784_20140818
32.4453	3.08602	7.23e-06	0.000791242	MSTRG.33181.1	637	---NA---	---NA---
41.3709	3.0743	6.17e-05	0.00400466	MSTRG.47662.1	641	aspartic protease family protein putative [Medicago truncatula]/gi	Medtr5g080330.1_aspartic_protease_family_protein,_putative_LC_chr5:34380900-34377963_20140818
191.873	3.07262	1.28e-07	3.26e-05	MSTRG.25625.2	1404	hypothetical protein MTR_3g466590 [Medicago truncatula]/gi	Medtr3g466590.1_hypothetical_protein_LC_chr3:27376193-27381419_20140818
34.7075	3.06988	7.46e-05	0.00461164	37861_t	3342	PREDICTED: uncharacterized protein LOC100790056 [Glycine max]	Medtr2g020090.1_hypothetical_protein_HC_chr2:6661981-6659686_20140818
197.613	3.04157	4.46e-07	8.7e-05	MSTRG.26197.2	1000	hypothetical protein MTR_3g466590 [Medicago truncatula]/gi	Medtr3g466590.1_hypothetical_protein_LC_chr3:27376193-27381419_20140818
874.256	3.03877	0.000546156	0.0192649	MSTRG.67662.2	1468	transmembrane amino acid transporter family protein [Medicago truncatula]/gi	Medtr4g055610.1_transmembrane_amino_acid_transporter_family_protein_HC_chr4:20285002-20289374_20140818
36.5	3.03115	5.21e-07	9.94e-05	37442_t	1065	BEST plant protein match is: (TAIR:plant.1) protein putative [Medicago truncatula]/gi	Medtr3g099600.1_BEST_plant_protein_match_is:_(TAIR:plant.1)_protein,_putative_HC_chr3:45661572-45658085_20140818
99.4896	3.02653	3.73e-12	4.3e-09	MSTRG.67534.10	3427	nucleoporin autopeptidase [Medicago truncatula]/gi	Medtr1g078040.2_nucleoporin_autopeptidase_HC_chr1:34898558-34890792_20140818
457.928	3.01875	5.08e-05	0.00348792	MSTRG.16489.1	438	---NA---	---NA---
80.7476	3.01785	5.28e-10	2.99e-07	MSTRG.2432.1	5471	disease resistance protein (CC-NBS-LRR class) family protein [Medicago truncatula]/gi	Medtr2g071850.1_disease_resistance_protein_(CC-NBS-LRR_class)_family_protein_LC_chr2:30020376-30026148_20140818
51.9811	3.00671	6.88e-07	0.000123228	MSTRG.44434.1	540	---NA---	---NA---
88.1613	3.00318	3.22e-11	2.68e-08	MSTRG.58895.14	766	hypothetical protein KK1_048371 [Cajanus cajan]	---NA---
828.512	2.99029	0.000303677	0.0128156	MSTRG.67662.4	1447	transmembrane amino acid transporter family protein [Medicago truncatula]/gi	Medtr4g055610.1_transmembrane_amino_acid_transporter_family_protein_HC_chr4:20285002-20289374_20140818
67.631	2.96419	1.57e-07	3.86e-05	10429_t	1038	PREDICTED: uncharacterized protein LOC108830220 [Raphanus sativus]	Medtr7g062720.1_Copia-like_polyprotein/retrotransposon,_putative_LC_chr7:22824311-22825240_20140818
31.2466	2.96356	8.38e-05	0.00501755	38371_t	744	hypothetical protein MTR_2g436380 [Medicago truncatula]/gi	Medtr2g436380.1_hypothetical_protein_LC_chr2:14145212-14146520_20140818
425.251	2.94268	0.000221361	0.0102278	MSTRG.16494.2	299	---NA---	---NA---
153.294	2.93871	0.0006054	0.0207499	MSTRG.61520.1	292	---NA---	---NA---
38.105	2.93383	1.1e-07	2.89e-05	MSTRG.54924.6	876	---NA---	---NA---
178.302	2.93326	7.08e-05	0.00444256	MSTRG.35259.1	213	---NA---	---NA---
58.8474	2.93246	4.13e-05	0.00299946	MSTRG.5200.3	1076	aconitate hydratase 1-like isoform X2 [Hevea brasiliensis]	Medtr4g048190.1_cytoplasmic-like_aconitate_hydratase_HC_chr4:17044934-17035507_20140818
216.466	2.92533	8.53e-16	2.4e-12	MSTRG.58895.6	787	hypothetical protein PHAVU_009G211300g partial [Phaseolus vulgaris]/gi	---NA---
145.755	2.92484	7.11e-06	0.000782203	165405_t	606	transmembrane protein putative [Medicago truncatula]/gi	Medtr5g039960.1_transmembrane_protein,_putative_LC_chr5:17590405-17589548_20140818
77.3577	2.91587	7.4e-14	1.25e-10	MSTRG.9198.12	1284	PREDICTED: aldo-keto reductase family 4 member C10-like [Cicer arietinum]/gi	Medtr4g021410.1_aldo/keto_reductase_family_oxidoreductase_HC_chr4:6956705-6962668_20140818
30.433	2.91324	5.71e-06	0.000664311	MSTRG.85508.9	1171	PPR containing plant protein [Medicago truncatula]/gi	Medtr6g024415.1_PPR_containing_plant_protein_LC_chr6:8744390-8743759_20140818
45.3428	2.91214	4.61e-05	0.00324571	MSTRG.13994.1	220	---NA---	---NA---
72.6383	2.90925	2.24e-12	2.67e-09	MSTRG.62897.1	1476	methyltransferase PMT16 putative [Medicago truncatula]/gi	Medtr7g076150.2_methyltransferase_PMT16,_putative_HC_chr7:28629548-28623929_20140818
57.7659	2.90228	2.98e-07	6.32e-05	MSTRG.29464.2	2046	HAT family dimerization domain-containing protein partial [Trifolium pratense]	Medtr4g120840.1_hypothetical_protein_HC_chr4:50046505-50047138_20140818
46.8789	2.90205	1.73e-08	5.98e-06	MSTRG.81868.4	694	PREDICTED: RNA polymerase II transcriptional coactivator KIWI-like [Cicer arietinum]/gi	Medtr3g096690.1_RNA_polymerase_II_transcriptional_coactivator_HC_chr3:44248657-44250867_20140818
181.375	2.89751	0.000210331	0.00984738	81987_t	651	albumin-2 protein [Medicago truncatula]/gi	Medtr0807s0020.1_albumin-2_protein_LC_scaffold0807:3562-4708_20140818
212.184	2.89575	1.22e-12	1.59e-09	MSTRG.69046.1	397	potato type II proteinase inhibitor family protein [Medicago truncatula]/gi	Medtr4g032865.1_potato_type_II_proteinase_inhibitor_family_protein_HC_chr4:11363448-11362693_20140818
96.9549	2.88775	0.000409847	0.0158974	MSTRG.76898.2	2644	---NA---	---NA---
50.912	2.8823	1.08e-07	2.86e-05	MSTRG.58029.1	7148	receptor-like protein [Medicago truncatula]/gi	Medtr6g039180.1_receptor-like_protein_LC_chr6:14113204-14108786_20140818
37.2902	2.88173	0.00011343	0.00628498	MSTRG.16494.1	296	---NA---	---NA---
35.9983	2.87859	0.000114287	0.00631665	MSTRG.9198.14	639	aldo/keto reductase family oxidoreductase [Medicago truncatula]/gi	Medtr4g021450.2_aldo/keto_reductase_family_oxidoreductase_HC_chr4:6976199-6978784_20140818
95.587	2.86019	1.42e-10	9.61e-08	MSTRG.41554.2	1273	TPX2 (targeting protein for Xklp2) family protein [Medicago truncatula]/gi	Medtr1g075310.1_TPX2_(targeting_protein_for_Xklp2)_family_protein_HC_chr1:33342141-33338595_20140818
137.429	2.85725	7.69e-09	2.96e-06	MSTRG.76815.4	2120	PREDICTED: (S)-tetrahydroprotoberberine N-methyltransferase-like isoform X2 [Cicer arietinum]	Medtr2g022200.1_ADP-ribosylation_factor-like_protein_A1D_HC_chr2:7631017-7626899_20140818
72.1905	2.85663	1.14e-06	0.000188465	MSTRG.48032.1	1227	hypothetical protein MTR_8g092880 [Medicago truncatula]/gi	Medtr8g092880.1_hypothetical_protein_HC_chr8:38945055-38942858_20140818
104.38	2.84498	6.37e-16	1.86e-12	154396_t	2835	disease resistance protein (TIR-NBS-LRR class) [Medicago truncatula]/gi	Medtr6g072250.1_disease_resistance_protein_(TIR-NBS-LRR_class)_LC_chr6:26728792-26732864_20140818
91.5613	2.84291	6.79e-06	0.000757693	MSTRG.42134.2	957	hypothetical protein MTR_1g056930 [Medicago truncatula]/gi	Medtr1g056930.1_hypothetical_protein_LC_chr1:24926850-24927116_20140818
32.6786	2.84152	0.00181978	0.0437226	MSTRG.79228.1	2161	PREDICTED: pentatricopeptide repeat-containing protein At3g02650 mitochondrial [Cicer arietinum]	Medtr3g081310.1_PPR_containing_plant_protein_HC_chr3:36828718-36830894_20140818
77.266	2.83874	8.27e-09	3.16e-06	MSTRG.9198.1	901	aldo/keto reductase family oxidoreductase [Medicago truncatula]/gi	Medtr4g021450.1_aldo/keto_reductase_family_oxidoreductase_HC_chr4:6976199-6978784_20140818
158.354	2.83615	4.8e-15	1.14e-11	MSTRG.42920.1	3616	disease resistance protein (TIR-NBS-LRR class) [Medicago truncatula]/gi	Medtr1g007300.1_disease_resistance_protein_(TIR-NBS-LRR_class)_LC_chr1:268696-264988_20140818
62.2993	2.82539	2.78e-05	0.00224503	MSTRG.38056.1	1645	magnesium and cobalt efflux protein CorC putative [Medicago truncatula]/gi	Medtr2g010520.1_magnesium_and_cobalt_efflux_protein_CorC,_putative_HC_chr2:2426201-2422876_20140818
135.476	2.82096	1.63e-05	0.00148796	MSTRG.72517.3	1056	---NA---	---NA---
512.666	2.82027	0.000419	0.0161193	MSTRG.16497.1	431	---NA---	---NA---
53.3989	2.8088	0.000102722	0.00584085	MSTRG.27228.1	889	---NA---	---NA---
60.0522	2.80176	1.18e-08	4.31e-06	165204_t	1038	DUF1262 family protein [Medicago truncatula]/gi	Medtr5g035760.1_DUF1262_family_protein_HC_chr5:15550371-15551866_20140818
381.895	2.79641	3.68e-21	3.16e-17	111634_t	7143	PREDICTED: uncharacterized protein LOC101500233 isoform X1 [Cicer arietinum]	Medtr3g466620.1_NB-ARC_domain_disease_resistance_protein_LC_chr3:27403732-27400482_20140818
131.522	2.7949	1.32e-07	3.34e-05	MSTRG.76815.1	1834	PREDICTED: (S)-tetrahydroprotoberberine N-methyltransferase-like isoform X2 [Cicer arietinum]	Medtr2g022200.1_ADP-ribosylation_factor-like_protein_A1D_HC_chr2:7631017-7626899_20140818
118.792	2.79285	4.4e-05	0.00314318	3252_t	1755	replication factor-A carboxy-terminal domain protein [Medicago truncatula]/gi	Medtr4g036240.2_replication_factor-A_carboxy-terminal_domain_protein_HC_chr4:11830642-11833873_20140818
5816.76	2.7925	1.25e-05	0.0012108	MSTRG.13403.1	1215	transmembrane protein putative [Medicago truncatula]/gi	Medtr3g016350.1_transmembrane_protein,_putative_HC_chr3:4878270-4877472_20140818
34.8129	2.78747	2.79e-05	0.00224931	MSTRG.33181.2	902	---NA---	---NA---
42.286	2.7844	0.000221773	0.0102335	MSTRG.8253.2	1081	disease resistance protein (TIR-NBS-LRR class) putative [Medicago truncatula]/gi	Medtr5g071610.2_disease_resistance_protein_(TIR-NBS-LRR_class),_putative_LC_chr5:30414519-30420343_20140818
72.3703	2.76877	9.26e-07	0.000158892	MSTRG.85508.3	1412	PPR containing plant protein [Medicago truncatula]/gi	Medtr6g024415.1_PPR_containing_plant_protein_LC_chr6:8744390-8743759_20140818
58.3084	2.76842	1.09e-09	5.5e-07	107587_t	5016	disease resistance protein (CC-NBS-LRR class) family protein [Medicago truncatula]/gi	Medtr2g071850.1_disease_resistance_protein_(CC-NBS-LRR_class)_family_protein_LC_chr2:30020376-30026148_20140818
42.2561	2.76765	4.94e-06	0.000589942	MSTRG.50867.2	1436	condensin-2 complex subunit H2-like protein [Medicago truncatula]/gi	Medtr2g436080.1_condensin-2_complex_subunit_H2-like_protein_HC_chr2:13980124-13986564_20140818
267.573	2.75838	0.000413859	0.0159997	MSTRG.57715.1	2208	replication factor-A carboxy-terminal domain protein [Medicago truncatula]/gi	Medtr4g036240.2_replication_factor-A_carboxy-terminal_domain_protein_HC_chr4:11830642-11833873_20140818
96.6865	2.75798	1.7e-10	1.1e-07	MSTRG.2035.1	2725	disease resistance protein (TIR-NBS-LRR class) [Medicago truncatula]/gi	Medtr6g075970.2_disease_resistance_protein_(TIR-NBS-LRR_class)_LC_chr6:28242590-28247236_20140818
25.7276	2.75751	0.0014908	0.0381605	MSTRG.42772.2	888	---NA---	---NA---
349.4	2.7515	3.52e-05	0.00267617	MSTRG.18920.7	1235	hypothetical protein MTR_3g466590 [Medicago truncatula]/gi	Medtr3g466590.1_hypothetical_protein_LC_chr3:27376193-27381419_20140818
53.8593	2.73684	2.17e-05	0.00185548	MSTRG.65053.3	1248	PREDICTED: NAD(P)H-dependent 6'-deoxychalcone synthase-like [Cicer arietinum]	Medtr3g083130.1_aldo/keto_reductase_family_oxidoreductase_HC_chr3:37505830-37503715_20140818
52.0592	2.73522	0.000101688	0.00580463	MSTRG.18579.1	693	unknown [Medicago truncatula]/gi	Medtr0026s0010.1_phloem_protein_HC_scaffold0026:6297-2153_20140818
146.497	2.73042	6.38e-05	0.00411905	MSTRG.41280.2	973	---NA---	---NA---
28.3526	2.72837	0.000147722	0.00759302	143467_t	4572	hypothetical protein L195_g024197 partial [Trifolium pratense]	Medtr0177s0050.1_hypothetical_protein_LC_scaffold0177:24299-22979_20140818
151.303	2.72688	3.68e-13	5.27e-10	MSTRG.42920.2	3455	disease resistance protein (TIR-NBS-LRR class) [Medicago truncatula]/gi	Medtr1g007300.1_disease_resistance_protein_(TIR-NBS-LRR_class)_LC_chr1:268696-264988_20140818
114.16	2.72245	0.00010271	0.00584085	MSTRG.72517.5	605	---NA---	---NA---
289.368	2.71999	2.54e-05	0.00208977	MSTRG.82288.17	1975	adenine nucleotide alpha hydrolase superfamily protein [Medicago truncatula]/gi	Medtr1g054765.1_adenine_nucleotide_alpha_hydrolase_superfamily_protein_HC_chr1:23937943-23936722_20140818
286.871	2.71787	0.000221981	0.0102365	MSTRG.57715.2	2369	replication factor-A carboxy-terminal domain protein [Medicago truncatula]/gi	Medtr4g036240.2_replication_factor-A_carboxy-terminal_domain_protein_HC_chr4:11830642-11833873_20140818
29.7883	2.71626	0.00016325	0.00817683	MSTRG.85306.1	248	thaumatin-like pathogenesis-related protein 4-like precursor partial [Trifolium pratense]	Medtr8g096920.1_pathogenesis-related_thaumatin_family_protein_HC_chr8:40682449-40681554_20140818
139.427	2.70674	6.63e-09	2.61e-06	MSTRG.42649.3	3280	LRR and NB-ARC domain disease resistance protein [Medicago truncatula]/gi	Medtr7g018850.1_LRR_and_NB-ARC_domain_disease_resistance_protein_LC_chr7:6251896-6245587_20140818
143.838	2.70655	5.6e-09	2.24e-06	MSTRG.42649.2	3291	LRR and NB-ARC domain disease resistance protein [Medicago truncatula]/gi	Medtr7g018850.1_LRR_and_NB-ARC_domain_disease_resistance_protein_LC_chr7:6251896-6245587_20140818
40.8694	2.70517	4.25e-08	1.31e-05	MSTRG.78201.1	234	---NA---	---NA---
132.542	2.70505	0.000371976	0.0148677	MSTRG.44717.4	933	---NA---	---NA---
57.5852	2.68639	1.33e-08	4.78e-06	MSTRG.87364.1	2810	Retrovirus-related Pol polyprotein from transposon TNT 1-94 [Cajanus cajan]	Medtr4g046673.1_hypothetical_protein_LC_chr4:16453842-16455341_20140818
98.3922	2.68337	6.31e-10	3.45e-07	193983_t	4911	PREDICTED: uncharacterized protein LOC102595311 [Solanum tuberosum]	Medtr6g045307.1_IPP_transferase_LC_chr6:16235075-16228160_20140818
37.75	2.67686	5.92e-07	0.000109563	MSTRG.24123.1	1039	tyrosine kinase family protein [Medicago truncatula]/gi	Medtr7g015800.1_tyrosine_kinase_family_protein_LC_chr7:4927048-4929733_20140818
57.7865	2.67345	5.32e-05	0.00360448	MSTRG.59938.2	1274	ATP-dependent RNA helicase A-like protein [Medicago truncatula]/gi	Medtr8g045110.1_ATP-dependent_RNA_helicase_A-like_protein_HC_chr8:17594404-17602720_20140818
122.911	2.65847	6.49e-07	0.000117866	MSTRG.76815.8	1728	PREDICTED: (S)-tetrahydroprotoberberine N-methyltransferase-like isoform X2 [Cicer arietinum]	Medtr2g022200.1_ADP-ribosylation_factor-like_protein_A1D_HC_chr2:7631017-7626899_20140818
36.3038	2.65738	5.57e-05	0.00371795	MSTRG.63201.7	421	---NA---	---NA---
30.9433	2.65415	3.14e-06	0.00041627	MSTRG.12882.5	615	40S ribosomal protein S6-2 partial [Glycine soja]	Medtr7g053160.1_40S_ribosomal_protein_S6-2_HC_chr7:18698849-18702010_20140818
241.281	2.64984	0.000400138	0.0156265	MSTRG.57715.3	1934	replication factor-A carboxy-terminal domain protein [Medicago truncatula]/gi	Medtr4g036240.2_replication_factor-A_carboxy-terminal_domain_protein_HC_chr4:11830642-11833873_20140818
57.0948	2.64655	3.96e-06	0.000496849	MSTRG.48032.2	1242	hypothetical protein MTR_8g092880 [Medicago truncatula]/gi	Medtr8g092880.1_hypothetical_protein_HC_chr8:38945055-38942858_20140818
38.7421	2.63111	5.4e-05	0.00363712	MSTRG.37076.2	1578	---NA---	---NA---
74.6223	2.62685	4.32e-07	8.48e-05	MSTRG.81986.3	1299	P-loop nucleoside triphosphate hydrolase superfamily protein [Medicago truncatula]/gi	Medtr8g098230.1_P-loop_nucleoside_triphosphate_hydrolase_superfamily_protein_HC_chr8:40988299-40979942_20140818
30.326	2.62159	0.00060154	0.0206771	MSTRG.8527.1	401	---NA---	---NA---
103.288	2.62051	1.94e-07	4.53e-05	MSTRG.76815.10	1219	ADP-ribosylation factor-related protein 1-like [Trifolium pratense]	Medtr2g022200.1_ADP-ribosylation_factor-like_protein_A1D_HC_chr2:7631017-7626899_20140818
122.766	2.61111	3.75e-07	7.63e-05	MSTRG.14602.2	2044	hypothetical protein MTR_0275s0040 partial [Medicago truncatula]/gi	Medtr0275s0040.1_hypothetical_protein_HC_scaffold0275:21984-21107_20140818
30.8257	2.59362	0.00011407	0.00630915	21449_t	861	uncoupling protein [Medicago truncatula]/gi	Medtr7g066690.1_uncoupling_protein_HC_chr7:24289153-24293583_20140818
180.584	2.59065	0.00174255	0.0424132	118679_t	1560	hypothetical protein MTR_3g466590 [Medicago truncatula]/gi	Medtr3g466590.1_hypothetical_protein_LC_chr3:27376193-27381419_20140818
38.5804	2.58798	1.77e-06	0.000265202	MSTRG.77878.2	1619	hypothetical protein TSUD_350750 [Trifolium subterraneum]	Medtr3g062980.1_hypothetical_protein_LC_chr3:28483211-28478928_20140818
154.515	2.58736	8.5e-05	0.00507515	MSTRG.41280.1	913	---NA---	---NA---
6850.59	2.57888	0.000617972	0.0210718	MSTRG.9889.5	1340	hypothetical protein KK1_048371 [Cajanus cajan]	---NA---
383.776	2.5733	0.000296805	0.0126184	MSTRG.18920.5	2103	hypothetical protein MTR_3g466590 [Medicago truncatula]/gi	Medtr3g466590.1_hypothetical_protein_LC_chr3:27376193-27381419_20140818
66.747	2.54561	5.85e-05	0.00385386	MSTRG.20699.4	769	---NA---	---NA---
37.1819	2.54295	0.0020691	0.0474817	156242_t	2871	Cytochrome cd1-nitrite reductase-like C-terminal haem d1 [Medicago truncatula]	Medtr1g018830.1_hypothetical_protein_HC_chr1:5545314-5542120_20140818
94.3997	2.53711	1.18e-05	0.00115168	MSTRG.70831.1	1727	nonsense-mediated mRNA decay NMD3 family protein [Medicago truncatula]/gi	Medtr4g107030.1_nonsense-mediated_mRNA_decay_NMD3_family_protein_HC_chr4:43995360-43996798_20140818
230.659	2.5271	1.14e-09	5.72e-07	MSTRG.82289.1	1404	adenine nucleotide alpha hydrolase superfamily protein [Medicago truncatula]/gi	Medtr1g054765.1_adenine_nucleotide_alpha_hydrolase_superfamily_protein_HC_chr1:23937943-23936722_20140818
136.264	2.51365	8.16e-07	0.000142847	MSTRG.14602.1	1904	hypothetical protein MTR_0275s0040 partial [Medicago truncatula]/gi	Medtr0275s0040.1_hypothetical_protein_HC_scaffold0275:21984-21107_20140818
87.4159	2.50824	2.23e-08	7.48e-06	178451_t	4566	PREDICTED: uncharacterized protein LOC102595311 [Solanum tuberosum]	Medtr6g045307.1_IPP_transferase_LC_chr6:16235075-16228160_20140818
138.383	2.50595	0.0020002	0.0464302	81981_t	651	albumin-2 protein [Medicago truncatula]/gi	Medtr0807s0020.1_albumin-2_protein_LC_scaffold0807:3562-4708_20140818
25.8412	2.50594	0.00165242	0.0410038	MSTRG.47550.1	949	BTB/POZ and MATH domain protein [Medicago truncatula]/gi	Medtr8g006190.1_BTB/POZ_and_MATH_domain_protein_HC_chr8:537855-540789_20140818
46.6114	2.50253	1.67e-06	0.00025555	MSTRG.11088.1	3038	disease resistance protein rga2-like [Trifolium pratense]	Medtr7g091140.1_LRR_and_NB-ARC_domain_disease_resistance_protein_LC_chr7:35958946-35950571_20140818
161.96	2.49958	4.56e-10	2.67e-07	MSTRG.42649.1	3424	LRR and NB-ARC domain disease resistance protein [Medicago truncatula]/gi	Medtr7g018850.1_LRR_and_NB-ARC_domain_disease_resistance_protein_LC_chr7:6251896-6245587_20140818
63.5099	2.49764	1.96e-08	6.67e-06	MSTRG.63173.16	494	hypothetical protein MTR_3g466610 [Medicago truncatula]/gi	Medtr3g466610.1_hypothetical_protein_LC_chr3:27392477-27387740_20140818
34.2783	2.49702	0.000180139	0.00880085	58145_t	1146	hypothetical protein TSUD_316110 [Trifolium subterraneum]	Medtr3g103070.1_calcium-transporting_ATPase_2,_plasma_membrane-type_protein_HC_chr3:47484864-47491044_20140818
137.086	2.4862	2.93e-06	0.000395102	MSTRG.1638.3	1359	Rpp4C4 [Medicago truncatula]/gi	Medtr1g036750.1_Rpp4C4_LC_chr1:13499879-13525465_20140818
128.868	2.4818	1e-06	0.000169689	MSTRG.14602.3	1905	hypothetical protein MTR_0275s0040 partial [Medicago truncatula]/gi	Medtr0275s0040.1_hypothetical_protein_HC_scaffold0275:21984-21107_20140818
79.3807	2.47777	8.53e-05	0.0050798	MSTRG.38506.4	1411	transposon protein [Trifolium pratense]	Medtr3g098650.2_glycoside_hydrolase_family_38_amino-terminal_domain_protein_chr3:45068920-45061132_20140818
87.466	2.47547	8.64e-07	0.000149273	MSTRG.38506.8	1063	transposon protein [Trifolium pratense]	Medtr3g098650.2_glycoside_hydrolase_family_38_amino-terminal_domain_protein_chr3:45068920-45061132_20140818
364.642	2.47517	1.02e-18	5.47e-15	141367_t	6168	PREDICTED: uncharacterized protein LOC101500233 isoform X1 [Cicer arietinum]	Medtr3g466620.1_NB-ARC_domain_disease_resistance_protein_LC_chr3:27403732-27400482_20140818
98.1918	2.47063	0.00186716	0.0443589	MSTRG.89033.2	3558	disease resistance protein (TIR-NBS-LRR class) [Medicago truncatula]/gi	Medtr4g043630.1_disease_resistance_protein_(TIR-NBS-LRR_class)_HC_chr4:14639336-14634064_20140818
81.8788	2.46014	0.00154577	0.0390149	156903_t	4212	disease resistance protein (TIR-NBS-LRR class) [Medicago truncatula]/gi	Medtr4g043630.1_disease_resistance_protein_(TIR-NBS-LRR_class)_HC_chr4:14639336-14634064_20140818
37.7855	2.45671	0.00134296	0.0354497	MSTRG.75999.1	767	hypothetical protein MTR_2g438560 [Medicago truncatula]/gi	Medtr2g438560.1_hypothetical_protein_HC_chr2:15589330-15587523_20140818
33.102	2.44708	0.00194543	0.0455823	MSTRG.37071.4	488	galactinol-raffinose galactosyltransferase [Medicago truncatula]/gi	Medtr7g091880.1_galactinol-raffinose_galactosyltransferase_HC_chr7:36372945-36367215_20140818
45.8018	2.44556	2.12e-05	0.00181858	75007_t	1779	hypothetical protein glysoja_018320 [Glycine soja]	Medtr2g092960.1_Myb/SANT-like_DNA-binding_domain_protein_LC_chr2:39569693-39563388_20140818
36.674	2.44407	0.000137455	0.00725021	MSTRG.19044.1	1147	Nse4 component of Smc5/6 DNA repair complex protein [Medicago truncatula]/gi	Medtr7g093090.1_Nse4,_component_of_Smc5/6_DNA_repair_complex_protein_HC_chr7:36968665-36972152_20140818
62.5909	2.44346	2.55e-07	5.59e-05	MSTRG.81868.2	693	PREDICTED: RNA polymerase II transcriptional coactivator KIWI-like [Cicer arietinum]/gi	Medtr3g096690.1_RNA_polymerase_II_transcriptional_coactivator_HC_chr3:44248657-44250867_20140818
60.3063	2.43748	1.95e-09	9.05e-07	MSTRG.82218.1	603	---NA---	---NA---
54.3981	2.43647	7.17e-05	0.00448572	MSTRG.76815.2	1674	PREDICTED: (S)-tetrahydroprotoberberine N-methyltransferase-like isoform X2 [Cicer arietinum]	Medtr2g022200.1_ADP-ribosylation_factor-like_protein_A1D_HC_chr2:7631017-7626899_20140818
52.6015	2.43287	1.69e-07	4.09e-05	MSTRG.718.1	1006	---NA---	---NA---
37.953	2.43044	0.000644368	0.0217025	MSTRG.42041.1	2467	PREDICTED: tRNA-splicing endonuclease subunit Sen54-like isoform X1 [Cicer arietinum]/gi	Medtr8g090105.1_tRNA-splicing_endonuclease_subunit_sen54_amino-terminal_protein_HC_chr8:37741275-37738113_20140818
41.7241	2.41954	0.000751149	0.0240234	188244_t	3651	structural maintenance of chromosomes protein [Medicago truncatula]/gi	Medtr1g051825.2_structural_maintenance_of_chromosomes_protein_HC_chr1:20727128-20747784_20140818
70.5576	2.41413	6.42e-06	0.000724346	MSTRG.72517.4	982	---NA---	---NA---
143.939	2.4136	1.39e-08	4.97e-06	MSTRG.58484.2	1760	PREDICTED: uncharacterized protein LOC105852696 [Cicer arietinum]	Medtr3g011100.1_F-box_and_associated_interaction_domain_protein_HC_chr3:2698683-2696484_20140818
104.365	2.40918	3.94e-06	0.000495299	MSTRG.15242.3	1405	receptor-like protein [Medicago truncatula]/gi	Medtr4g032320.1_receptor-like_protein_LC_chr4:11120640-11117356_20140818
43.2954	2.40865	0.000715076	0.0232733	MSTRG.65869.3	1192	hypothetical protein TSUD_330940 [Trifolium subterraneum]	Medtr8g090105.1_tRNA-splicing_endonuclease_subunit_sen54_amino-terminal_protein_HC_chr8:37741275-37738113_20140818
57.9884	2.40526	8.5e-05	0.00507515	MSTRG.65053.2	1457	PREDICTED: NAD(P)H-dependent 6'-deoxychalcone synthase-like [Cicer arietinum]	Medtr3g083130.1_aldo/keto_reductase_family_oxidoreductase_HC_chr3:37505830-37503715_20140818
40.8818	2.39681	1.18e-08	4.32e-06	MSTRG.15385.1	369	---NA---	---NA---
33.6741	2.39189	6.51e-06	0.000732745	MSTRG.27216.1	640	---NA---	Medtr0138s0070.1_hypothetical_protein_LC_scaffold0138:26382-27283_20140818
181.173	2.3912	5.94e-08	1.73e-05	MSTRG.32847.3	1426	O-acetylserine (thiol) lyase [Medicago truncatula]/gi	Medtr1g081620.1_O-acetylserine_(thiol)_lyase_HC_chr1:36280172-36284490_20140818
51.5402	2.39113	1.36e-09	6.68e-07	115770_t	3288	receptor-like protein [Medicago truncatula]/gi	Medtr3g027330.1_receptor-like_protein_LC_chr3:8525327-8522316_20140818
110.178	2.38412	0.000690393	0.0227471	MSTRG.81037.4	1119	hypothetical protein CDL12_28418 [Handroanthus impetiginosus]/gi	Medtr7g098290.2_60S_ribosomal_L23-like_protein_HC_chr7:39328210-39327083_20140818
54.1608	2.38269	7.93e-10	4.22e-07	MSTRG.89339.4	1910	hypothetical protein L195_g031334 [Trifolium pratense]	Medtr3g006170.1_retinoblastoma-related_protein,_putative_HC_chr3:570880-569693_20140818
49.9666	2.38178	3.18e-06	0.000420638	163622_t	2643	hypothetical protein TSUD_158760 [Trifolium subterraneum]	Medtr2g092960.1_Myb/SANT-like_DNA-binding_domain_protein_LC_chr2:39569693-39563388_20140818
55.5389	2.37736	1.44e-07	3.57e-05	MSTRG.9198.11	1269	aldo/keto reductase family oxidoreductase [Medicago truncatula]/gi	Medtr4g021450.1_aldo/keto_reductase_family_oxidoreductase_HC_chr4:6976199-6978784_20140818
41.314	2.37413	7.66e-05	0.00470387	167835_t	3018	ankyrin repeat plant-like protein [Medicago truncatula]/gi	Medtr2g101310.1_ankyrin_repeat_plant-like_protein_HC_chr2:43551099-43548442_20140818
98.5975	2.37285	1.24e-05	0.00120639	MSTRG.82392.1	661	hypothetical protein L195_g027283 partial [Trifolium pratense]	---NA---
42.2282	2.36475	0.00070779	0.0231187	MSTRG.27228.2	612	---NA---	---NA---
70.6476	2.36472	0.000213884	0.00997754	MSTRG.61968.3	1051	cell division cycle-like protein [Medicago truncatula]/gi	Medtr6g016680.1_cell_division_cycle-like_protein_HC_chr6:6381476-6392651_20140818
48.7023	2.36299	0.00172877	0.0421704	MSTRG.9198.16	776	aldo/keto reductase family oxidoreductase [Medicago truncatula]/gi	Medtr4g021450.2_aldo/keto_reductase_family_oxidoreductase_HC_chr4:6976199-6978784_20140818
43.3138	2.35929	2.7e-07	5.88e-05	MSTRG.39415.10	806	Protein kinase [Medicago truncatula]	Medtr8g041880.1_cysteine-rich_receptor-like_kinase_HC_chr8:15802331-15798924_20140818
38.2709	2.35899	0.000182875	0.00889246	MSTRG.62897.3	1262	Protein of unknown function DUF248 methyltransferase putative [Medicago truncatula]/gi	Medtr7g076150.1_methyltransferase_PMT16,_putative_HC_chr7:28629556-28623898_20140818
29.2208	2.35456	8.16e-05	0.00492367	MSTRG.85508.8	1271	PPR containing plant protein [Medicago truncatula]/gi	Medtr6g024415.1_PPR_containing_plant_protein_LC_chr6:8744390-8743759_20140818
42.9391	2.35398	0.000768047	0.0243627	152843_t	3369	Cytochrome cd1-nitrite reductase-like C-terminal haem d1 [Medicago truncatula]	Medtr1g018830.1_hypothetical_protein_HC_chr1:5545314-5542120_20140818
252.62	2.34822	1.6e-08	5.6e-06	MSTRG.47667.8	1206	unknown [Medicago truncatula]/gi	Medtr3g082420.2_hypothetical_protein_HC_chr3:37203737-37205754_20140818
140.846	2.34615	0.000749341	0.0239854	MSTRG.82025.3	1863	PREDICTED: uncharacterized protein LOC108830220 [Raphanus sativus]	Medtr7g062720.1_Copia-like_polyprotein/retrotransposon,_putative_LC_chr7:22824311-22825240_20140818
74.8968	2.34462	6.12e-07	0.000112595	MSTRG.86067.8	1357	lipase [Medicago truncatula]/gi	Medtr3g069720.1_lipase_HC_chr3:31213780-31210849_20140818
98.4919	2.34112	3.37e-07	6.91e-05	89066_t	6789	hypothetical protein TSUD_148900 [Trifolium subterraneum]	Medtr3g466590.1_hypothetical_protein_LC_chr3:27376193-27381419_20140818
76.3275	2.34066	3.41e-06	0.000444227	MSTRG.44717.1	982	---NA---	---NA---
44.7686	2.32319	0.000172564	0.00852236	126877_t	2382	disease resistance protein (TIR-NBS-LRR class) [Trifolium pratense]	Medtr4g023260.1_disease_resistance_protein_(TIR-NBS-LRR_class),_putative_LC_chr4:7840233-7834686_20140818
93.3265	2.31409	8.94e-10	4.68e-07	182956_t	1056	cysteine synthase-like protein partial [Trifolium pratense]	Medtr1g081620.1_O-acetylserine_(thiol)_lyase_HC_chr1:36280172-36284490_20140818
67.36	2.31344	0.000851146	0.0261265	MSTRG.46543.1	4781	RNA-directed DNA polymerase (Reverse transcriptase); Ribonuclease H [Medicago truncatula]	Medtr3g048535.1_hypothetical_protein_LC_chr3:17992939-17990764_20140818
66.5886	2.31296	8.61e-06	0.000911128	MSTRG.48148.6	629	structural constituent of ribosome protein putative [Medicago truncatula]/gi	Medtr2g021040.2_structural_constituent_of_ribosome_protein,_putative_HC_chr2:7107810-7113276_20140818
55.162	2.31143	0.000483815	0.0177195	147959_t	4335	RNA-directed DNA polymerase (Reverse transcriptase); Ribonuclease H [Medicago truncatula]	Medtr3g048535.1_hypothetical_protein_LC_chr3:17992939-17990764_20140818
248.161	2.30921	3.31e-09	1.43e-06	MSTRG.32847.1	1494	O-acetylserine (thiol) lyase [Medicago truncatula]/gi	Medtr1g081620.1_O-acetylserine_(thiol)_lyase_HC_chr1:36280172-36284490_20140818
55.6176	2.30696	6.3e-05	0.00407592	MSTRG.89208.1	4032	structural maintenance of chromosomes protein [Medicago truncatula]/gi	Medtr1g051825.2_structural_maintenance_of_chromosomes_protein_HC_chr1:20727128-20747784_20140818
73.5161	2.30364	0.000750738	0.0240153	MSTRG.43731.4	1038	hypothetical protein MTR_7g011390 [Medicago truncatula]/gi	Medtr7g011390.1_hypothetical_protein_HC_chr7:3064456-3063232_20140818
116.923	2.29449	4.73e-07	9.14e-05	MSTRG.2115.1	1372	PREDICTED: serine/threonine protein phosphatase 2A 55 kDa regulatory subunit B beta isoform isoform X1 [Fragaria vesca subsp. vesca]	Medtr1g040810.1_protein_phosphatase_2A_55_kDa_regulatory_subunit_B_HC_chr1:18464856-18466358_20140818
49.5552	2.29435	0.000580641	0.0201375	MSTRG.41271.2	1398	hypothetical protein TSUD_372880 [Trifolium subterraneum]	Medtr3g056240.1_DUF223_domain_protein_HC_chr3:22396065-22393475_20140818
1237.47	2.29427	1.53e-13	2.42e-10	MSTRG.82333.2	2362	plant/F10M23-360 protein [Medicago truncatula]/gi	Medtr5g036420.1_plant/F10M23-360_protein_HC_chr5:15875140-15868742_20140818
129.651	2.29343	2.6e-07	5.7e-05	MSTRG.58484.3	2013	PREDICTED: uncharacterized protein LOC101492457 isoform X1 [Cicer arietinum]	Medtr3g011100.1_F-box_and_associated_interaction_domain_protein_HC_chr3:2698683-2696484_20140818
30.6365	2.29121	0.000174341	0.00858903	21012_t	792	transmembrane protein putative [Medicago truncatula]/gi	Medtr6g027600.1_transmembrane_protein,_putative_HC_chr6:9567975-9570859_20140818
24.9655	2.28805	0.00107105	0.0304759	MSTRG.14894.2	616	LRR and NB-ARC domain disease resistance protein [Medicago truncatula]/gi	Medtr3g464870.1_LRR_and_NB-ARC_domain_disease_resistance_protein_LC_chr3:26186017-26176033_20140818
45.5702	2.28657	4.31e-06	0.000530062	MSTRG.718.2	843	---NA---	---NA---
60.4332	2.28482	4.89e-08	1.47e-05	MSTRG.11819.5	1099	sugar porter (SP) family MFS transporter [Medicago truncatula]/gi	Medtr4g118610.2_sugar_porter_(SP)_family_MFS_transporter_HC_chr4:49131241-49135079_20140818
60.1486	2.28348	0.00038015	0.0150817	135964_t	2697	NB-ARC domain disease resistance protein [Medicago truncatula]/gi	Medtr3g055720.1_NB-ARC_domain_disease_resistance_protein_LC_chr3:21936546-21940798_20140818
34.5621	2.28299	2.96e-05	0.00234916	MSTRG.40873.1	1553	putative alpha-amylase 2 [Quercus suber]	Medtr1g026170.1_alpha_amylase_domain_protein_HC_chr1:8455846-8461251_20140818
61.1443	2.2762	1.23e-06	0.000198822	164748_t	2637	LRR and NB-ARC domain disease resistance protein [Medicago truncatula]/gi	Medtr3g055870.1_LRR_and_NB-ARC_domain_disease_resistance_protein_LC_chr3:22186461-22189188_20140818
45.0816	2.27099	0.000141113	0.00737071	MSTRG.67960.1	270	---NA---	---NA---
45.1389	2.26963	3.67e-05	0.00276319	MSTRG.4180.3	599	hypothetical protein MTR_5g061550 [Medicago truncatula]/gi	Medtr5g061550.1_hypothetical_protein_HC_chr5:25564860-25565394_20140818
51.8709	2.26703	3.4e-05	0.00261007	MSTRG.76815.3	1951	cyclopropane-fatty-acyl-phospholipid synthase [Medicago truncatula]/gi	Medtr1g073700.1_cyclopropane-fatty-acyl-phospholipid_synthase_HC_chr1:32708616-32700293_20140818
62.6341	2.26287	0.000151315	0.00773663	MSTRG.20699.7	877	PREDICTED: uncharacterized protein LOC108321544 isoform X2 [Vigna angularis]	Medtr4g129150.1_YaeB/AF-0241_family_methyltransferase,_putative_HC_chr4:53769515-53765085_20140818
50.637	2.26262	0.00210599	0.0480437	MSTRG.44717.2	1056	---NA---	---NA---
93.038	2.25913	8.53e-07	0.000147801	MSTRG.23863.1	707	hypothetical protein TSUD_220720 [Trifolium subterraneum]	Medtr7g033950.1_hypothetical_protein_HC_chr7:12510835-12509838_20140818
36.0452	2.25864	0.00172504	0.0421192	MSTRG.59326.15	1259	transducin family protein/WD-40 repeat protein [Medicago truncatula]/gi	Medtr4g114930.1_transducin_family_protein/WD-40_repeat_protein_HC_chr4:47361809-47381261_20140818
78.1155	2.25855	8.98e-05	0.00526985	83963_t	1437	nonsense-mediated mRNA decay NMD3 family protein [Medicago truncatula]/gi	Medtr4g107030.1_nonsense-mediated_mRNA_decay_NMD3_family_protein_HC_chr4:43995360-43996798_20140818
122.86	2.2564	1.75e-06	0.000263529	MSTRG.58484.1	2080	PREDICTED: uncharacterized protein LOC101492457 isoform X1 [Cicer arietinum]	Medtr3g011100.1_F-box_and_associated_interaction_domain_protein_HC_chr3:2698683-2696484_20140818
45.9828	2.25452	5.17e-05	0.00352864	MSTRG.71975.3	840	P-loop nucleoside triphosphate hydrolase superfamily protein [Medicago truncatula]/gi	Medtr8g098230.1_P-loop_nucleoside_triphosphate_hydrolase_superfamily_protein_HC_chr8:40988299-40979942_20140818
926.954	2.25169	7.37e-05	0.00457675	MSTRG.73426.4	2508	---NA---	---NA---
73.3822	2.24951	0.000780255	0.0246239	MSTRG.80682.1	2426	PREDICTED: cysteine-rich receptor-like protein kinase 25 [Cicer arietinum]	Medtr3g011910.1_cysteine-rich_receptor-kinase-like_protein_HC_chr3:3099120-3104274_20140818
24.3428	2.24897	0.00209384	0.0478651	MSTRG.25467.3	969	hypothetical protein TSUD_150240 [Trifolium subterraneum]	Medtr7g019190.1_hypothetical_protein_LC_chr7:6409891-6416515_20140818
55.5686	2.24664	3.23e-05	0.00251396	MSTRG.63173.15	466	hypothetical protein MTR_3g466590 [Medicago truncatula]/gi	Medtr3g466590.1_hypothetical_protein_LC_chr3:27376193-27381419_20140818
130.198	2.24624	4.8e-06	0.000578515	MSTRG.81868.1	871	PREDICTED: RNA polymerase II transcriptional coactivator KIWI-like [Cicer arietinum]/gi	Medtr3g096690.1_RNA_polymerase_II_transcriptional_coactivator_HC_chr3:44248657-44250867_20140818
49.9413	2.24381	1.81e-07	4.29e-05	MSTRG.45472.1	1338	PREDICTED: alpha-amylase-like [Cicer arietinum]	Medtr1g019480.1_alpha_amylase_domain_protein_HC_chr1:5884776-5886764_20140818
876.923	2.2424	4.97e-05	0.00342281	MSTRG.73426.5	2480	---NA---	---NA---
42.9783	2.23915	1.84e-06	0.000273502	155031_t	1269	PREDICTED: alpha-amylase-like [Cicer arietinum]	Medtr1g019480.1_alpha_amylase_domain_protein_HC_chr1:5884776-5886764_20140818
123.9	2.23641	2.08e-14	4.24e-11	MSTRG.76014.2	1340	---NA---	---NA---
211.324	2.23613	0.000140058	0.00733302	MSTRG.1638.2	5194	disease resistance protein (CC-NBS-LRR class) family protein [Medicago truncatula]/gi	Medtr2g089975.1_disease_resistance_protein_(CC-NBS-LRR_class)_family_protein_LC_chr2:38061396-38047850_20140818
32.3591	2.23611	0.00116048	0.0322539	MSTRG.27592.4	1218	---NA---	Medtr4g124820.1_hypothetical_protein_HC_chr4:51742437-51745498_20140818
29.1098	2.23304	0.00222089	0.0497418	MSTRG.88509.1	629	---NA---	---NA---
1294.55	2.23219	5.84e-13	8.14e-10	MSTRG.82333.1	2422	plant/F10M23-360 protein [Medicago truncatula]/gi	Medtr5g036420.1_plant/F10M23-360_protein_HC_chr5:15875140-15868742_20140818
41.6627	2.22604	5.69e-06	0.000662777	MSTRG.71575.1	256	---NA---	---NA---
105.826	2.22078	3.59e-06	0.000462141	MSTRG.45022.3	1073	replication factor-A carboxy-terminal domain protein [Medicago truncatula]/gi	Medtr3g056270.1_replication_factor-A_carboxy-terminal_domain_protein_HC_chr3:22409504-22413525_20140818
28.0674	2.21601	0.000440373	0.0166156	MSTRG.81874.1	1246	---NA---	---NA---
58.5069	2.21263	8.47e-07	0.000147342	MSTRG.76015.1	1199	---NA---	---NA---
33.2012	2.21124	2.63e-05	0.00215011	MSTRG.19149.1	287	---NA---	---NA---
54.4699	2.20947	1.9e-08	6.51e-06	MSTRG.76015.2	1050	unknown [Medicago truncatula]	Medtr2g055850.1_DEAD-box_ATP-dependent_RNA_helicase-like_protein_HC_chr2:23956977-23948909_20140818
41.9849	2.20494	0.000269349	0.0117644	MSTRG.82966.1	522	transmembrane protein putative [Medicago truncatula]/gi	Medtr3g453190.1_transmembrane_protein,_putative_LC_chr3:20333070-20328554_20140818
91.6976	2.20319	3.6e-06	0.000463732	MSTRG.68758.1	2924	plant phospholipase-like protein [Medicago truncatula]/gi	Medtr8g089500.1_plant_phospholipase-like_protein_HC_chr8:37204184-37202286_20140818
41.3654	2.2022	0.000161331	0.00810697	MSTRG.54924.4	932	---NA---	---NA---
121.193	2.19767	1.68e-07	4.08e-05	180431_t	504	chaperone protein DnaJ 11 [Medicago truncatula]/gi	Medtr5g022180.1_chaperone_protein_DnaJ_11_HC_chr5:8707162-8708042_20140818
221.548	2.19766	2.18e-13	3.31e-10	MSTRG.41554.3	2039	TPX2 (targeting protein for Xklp2) family protein [Medicago truncatula]/gi	Medtr1g075310.1_TPX2_(targeting_protein_for_Xklp2)_family_protein_HC_chr1:33342141-33338595_20140818
61.6077	2.19396	0.0011341	0.0317086	10071_t	795	---NA---	---NA---
315.516	2.19142	2.8e-11	2.37e-08	MSTRG.32847.6	1647	O-acetylserine (thiol) lyase [Medicago truncatula]/gi	Medtr1g081620.1_O-acetylserine_(thiol)_lyase_HC_chr1:36280172-36284490_20140818
30.0642	2.19034	0.000171477	0.00848467	MSTRG.1142.18	2191	zein-binding protein [Medicago truncatula]/gi	Medtr0168s0060.1_zein-binding_protein_HC_scaffold0168:18855-21061_20140818
118.03	2.18484	0.000175331	0.00861759	MSTRG.81037.2	1239	hypothetical protein CDL12_28418 [Handroanthus impetiginosus]/gi	Medtr7g098290.2_60S_ribosomal_L23-like_protein_HC_chr7:39328210-39327083_20140818
50.7973	2.1839	0.000822323	0.025469	MSTRG.37071.2	993	MAP kinase kinase [Medicago truncatula]/gi	Medtr6g005210.1_MAP_kinase_kinase_HC_chr6:656528-650537_20140818
4618.8	2.17981	0.000501782	0.0181459	MSTRG.9889.41	1195	keratin-associated protein 10-6-like [Oryzias latipes]	---NA---
38.3002	2.17537	5.89e-06	0.000680489	MSTRG.55544.1	481	---NA---	---NA---
60.9375	2.16907	3.48e-05	0.00265351	144906_t	7737	Integrase catalytic region; Zinc finger CCHC-type; Peptidase aspartic catalytic [Medicago truncatula]	Medtr1g075310.1_TPX2_(targeting_protein_for_Xklp2)_family_protein_HC_chr1:33342141-33338595_20140818
25.3644	2.16609	0.00111099	0.0312427	MSTRG.58005.1	206	hypothetical protein MTR_7g074470 [Medicago truncatula]/gi	Medtr7g074470.1_hypothetical_protein_LC_chr7:27833510-27832868_20140818
62.6029	2.1659	0.000114395	0.00631811	MSTRG.85508.15	1362	PPR containing plant protein [Medicago truncatula]/gi	Medtr6g024415.1_PPR_containing_plant_protein_LC_chr6:8744390-8743759_20140818
95.954	2.16478	1.67e-11	1.52e-08	MSTRG.67534.11	2610	hypothetical protein TSUD_392200 [Trifolium subterraneum]	Medtr1g078040.2_nucleoporin_autopeptidase_HC_chr1:34898558-34890792_20140818
102.564	2.16326	2.69e-07	5.86e-05	MSTRG.35446.1	1425	DUF1262 family protein [Medicago truncatula]/gi	Medtr5g035760.1_DUF1262_family_protein_HC_chr5:15550371-15551866_20140818
60.5721	2.15401	0.00181035	0.0435501	MSTRG.84475.3	812	animal RPA1 domain protein [Medicago truncatula]/gi	Medtr7g117425.1_animal_RPA1_domain_protein_LC_chr7:48554380-48555674_20140818
47.961	2.15395	8.59e-05	0.00509494	MSTRG.44717.3	936	---NA---	---NA---
69.4484	2.15325	3.37e-08	1.07e-05	MSTRG.22717.2	3051	PPR containing plant-like protein [Medicago truncatula]/gi	Medtr3g023180.1_PPR_containing_plant-like_protein_HC_chr3:7000866-7006661_20140818
144.51	2.15323	3.91e-07	7.85e-05	MSTRG.85742.4	1757	zinc induced facilitator-like protein [Medicago truncatula]/gi	Medtr3g010850.1_zinc_induced_facilitator-like_protein_LC_chr3:2619747-2625343_20140818
219.556	2.15304	2.23e-07	5.06e-05	41817_t	2064	cytochrome P450 family protein [Medicago truncatula]/gi	Medtr5g091760.1_cytochrome_P450_family_protein_HC_chr5:40043223-40041438_20140818
92.3752	2.14921	1.21e-09	6.05e-07	MSTRG.41554.1	1778	TPX2 (targeting protein for Xklp2) family protein [Medicago truncatula]/gi	Medtr1g075310.1_TPX2_(targeting_protein_for_Xklp2)_family_protein_HC_chr1:33342141-33338595_20140818
71.43	2.14764	1.57e-09	7.52e-07	MSTRG.76014.1	1281	---NA---	---NA---
40.5037	2.1397	4.88e-05	0.00338133	MSTRG.59326.12	2090	pre-mRNA-splicing factor RSE1-like protein [Medicago truncatula]/gi	Medtr7g107350.1_pre-mRNA-splicing_factor_RSE1-like_protein_HC_chr7:43803096-43788689_20140818
154.947	2.1397	5.22e-07	9.94e-05	MSTRG.85742.1	1970	zinc induced facilitator-like protein [Medicago truncatula]/gi	Medtr3g010850.1_zinc_induced_facilitator-like_protein_LC_chr3:2619747-2625343_20140818
185.741	2.13958	9.82e-07	0.000166673	MSTRG.85742.2	2153	zinc induced facilitator-like protein [Medicago truncatula]/gi	Medtr3g010850.1_zinc_induced_facilitator-like_protein_LC_chr3:2619747-2625343_20140818
24.4007	2.13379	0.000239829	0.0108166	41102_t	399	replication factor-A carboxy-terminal domain protein [Medicago truncatula]/gi	Medtr8g479260.1_replication_factor-A_carboxy-terminal_domain_protein_LC_chr8:33777150-33779789_20140818
95.6191	2.12757	0.000397725	0.0155597	1975_t	957	nuclear transcription factor Y subunit C4 [Medicago truncatula]	Medtr7g113680.1_nuclear_transcription_factor_Y_protein_HC_chr7:46853507-46850661_20140818
49.3509	2.11988	0.00223012	0.0499053	MSTRG.65474.1	631	carnitinyl-CoA dehydratase-like protein [Trifolium pratense]	Medtr7g024300.1_enoyl-CoA_hydratase/isomerase_family_protein_HC_chr7:7973087-7974500_20140818
85.5292	2.11374	0.000121938	0.00666004	MSTRG.89486.3	452	hypothetical protein L195_g027283 partial [Trifolium pratense]	---NA---
81.4819	2.1126	1.05e-09	5.4e-07	111077_t	3507	PREDICTED: leucine-rich repeat receptor protein kinase MSP1-like isoform X2 [Cicer arietinum]	Medtr7g066590.1_LRR_receptor-like_kinase_HC_chr7:24243931-24241034_20140818
115.553	2.11243	6.59e-07	0.000119137	MSTRG.70166.4	1843	calcineurin B-like protein 4-1 [Medicago truncatula]/gi	Medtr8g099575.1_calcineurin_B-like_protein_4-1_HC_chr8:42073701-42069913_20140818
297.937	2.11163	4.26e-09	1.78e-06	MSTRG.32847.4	1694	O-acetylserine (thiol) lyase [Medicago truncatula]/gi	Medtr1g081620.1_O-acetylserine_(thiol)_lyase_HC_chr1:36280172-36284490_20140818
232.36	2.10904	1.34e-08	4.82e-06	153792_t	1032	hypothetical protein MTR_8g096660 [Medicago truncatula]/gi	Medtr8g096660.1_hypothetical_protein_LC_chr8:40544044-40545603_20140818
973.992	2.10797	2.96e-06	0.000397133	MSTRG.70660.1	1092	hypothetical protein MTR_8g096660 [Medicago truncatula]/gi	Medtr8g096660.1_hypothetical_protein_LC_chr8:40544044-40545603_20140818
96.9288	2.10607	1.59e-09	7.6e-07	MSTRG.76014.3	1207	---NA---	---NA---
62.112	2.10542	0.00157248	0.0395218	MSTRG.15734.4	1078	LysM receptor kinase K1B [Medicago truncatula]/gi	Medtr5g086040.3_LysM_receptor_kinase_K1B_HC_chr5:37200474-37204679_20140818
122.585	2.10505	3.74e-07	7.61e-05	MSTRG.63173.3	7098	hypothetical protein TSUD_148900 [Trifolium subterraneum]	Medtr3g466590.1_hypothetical_protein_LC_chr3:27376193-27381419_20140818
77.3832	2.10388	0.000553761	0.0194667	97747_t	450	---NA---	---NA---
54.3637	2.10193	7.28e-06	0.000794242	MSTRG.77107.1	740	---NA---	---NA---
41.5482	2.10026	2.07e-05	0.00179059	115771_t	648	receptor-like protein [Medicago truncatula]/gi	Medtr3g027330.1_receptor-like_protein_LC_chr3:8525327-8522316_20140818
31.1276	2.09874	0.000755252	0.0240981	100544_t	1248	BEST plant protein match is: (TAIR:plant.1) protein putative [Medicago truncatula]/gi	Medtr3g099600.1_BEST_plant_protein_match_is:_(TAIR:plant.1)_protein,_putative_HC_chr3:45661572-45658085_20140818
61.8929	2.09718	0.000182204	0.00886819	32529_t	600	hypothetical protein MTR_6g021860 [Medicago truncatula]/gi	Medtr6g021860.1_hypothetical_protein_LC_chr6:7558677-7559188_20140818
76.1751	2.09695	0.00120939	0.0331261	MSTRG.15734.2	1261	LysM receptor kinase K1B [Medicago truncatula]/gi	Medtr5g086040.3_LysM_receptor_kinase_K1B_HC_chr5:37200474-37204679_20140818
185.21	2.09616	2.69e-11	2.29e-08	MSTRG.41554.4	2001	TPX2 (targeting protein for Xklp2) family protein [Medicago truncatula]/gi	Medtr1g075310.1_TPX2_(targeting_protein_for_Xklp2)_family_protein_HC_chr1:33342141-33338595_20140818
55.1857	2.09388	5.92e-06	0.000683188	53438_t	1164	transmembrane protein putative [Medicago truncatula]/gi	Medtr5g036520.1_transmembrane_protein,_putative_LC_chr5:15935958-15934992_20140818
67.9947	2.09141	0.000389317	0.0153431	MSTRG.82169.4	3108	NB-ARC domain disease resistance protein [Medicago truncatula]/gi	Medtr3g055720.1_NB-ARC_domain_disease_resistance_protein_LC_chr3:21936546-21940798_20140818
81.5534	2.08916	0.000888935	0.0268556	MSTRG.15734.3	1198	LysM receptor kinase K1B [Medicago truncatula]/gi	Medtr5g086040.3_LysM_receptor_kinase_K1B_HC_chr5:37200474-37204679_20140818
37.7037	2.08754	0.00199984	0.0464288	MSTRG.35744.1	391	hypothetical protein MTR_8g479440 [Medicago truncatula]/gi	Medtr8g479440.1_hypothetical_protein_LC_chr8:33880932-33879676_20140818
63.1908	2.08712	0.000394042	0.0154546	MSTRG.71306.1	302	---NA---	---NA---
40.3274	2.08697	0.0013407	0.0354286	34307_t	6564	ATP-dependent RNA helicase DHX36-like protein [Medicago truncatula]/gi	Medtr8g044260.1_ATP-dependent_RNA_helicase_DHX36-like_protein_HC_chr8:16995201-16976389_20140818
42.3599	2.08489	0.000661255	0.0221166	MSTRG.39634.1	1130	---NA---	Medtr6g465690.1_dehydration-responsive_element-binding_protein_1B_LC_chr6:23391838-23390649_20140818
47.447	2.0844	1.38e-05	0.00131052	26849_t	507	fiber protein Fb34 [Medicago truncatula]/gi	Medtr2g079830.1_fiber_protein_Fb34_HC_chr2:33645377-33642906_20140818
57.079	2.08423	1.24e-06	0.000201173	MSTRG.54924.3	1159	---NA---	---NA---
1149.6	2.07899	2.34e-05	0.00196895	MSTRG.9369.1	1205	transmembrane protein putative [Medicago truncatula]/gi	Medtr5g036520.1_transmembrane_protein,_putative_LC_chr5:15935958-15934992_20140818
93.6453	2.07647	0.000201567	0.00958013	MSTRG.89486.2	862	hypothetical protein L195_g027283 partial [Trifolium pratense]	---NA---
39.8756	2.07468	0.000345172	0.014102	MSTRG.37845.1	680	glycoside hydrolase family 1 protein [Medicago truncatula]/gi	Medtr4g016920.1_glycoside_hydrolase_family_1_protein_HC_chr4:5221708-5216027_20140818
101.669	2.07261	1.08e-06	0.000181209	93209_t	1359	UDP-glucosyltransferase family protein [Medicago truncatula]/gi	Medtr5g072820.1_UDP-glucosyltransferase_family_protein_HC_chr5:30989979-30993244_20140818
48.6861	2.07035	2.95e-05	0.00234537	MSTRG.77107.2	358	---NA---	---NA---
51.4187	2.06866	0.000852901	0.0261622	MSTRG.87921.1	210	---NA---	Medtr7g010570.1_hypothetical_protein_LC_chr7:2630928-2632452_20140818
56.7073	2.06669	7.33e-05	0.00456402	MSTRG.86067.10	1239	lipase [Medicago truncatula]/gi	Medtr3g069720.1_lipase_HC_chr3:31213780-31210849_20140818
78.2432	2.06561	8.08e-05	0.00488496	MSTRG.72594.2	2125	zinc finger BED domain-containing protein RICESLEEPER 2-like [Arachis ipaensis]	Medtr5g034530.1_hypothetical_protein_LC_chr5:14993712-14993306_20140818
87.9069	2.06494	1.96e-11	1.74e-08	MSTRG.86196.4	1375	tyrosine specific protein phosphatase family protein [Medicago truncatula]/gi	Medtr4g132810.1_tyrosine_specific_protein_phosphatase_family_protein_HC_chr4:55548045-55544901_20140818
51.5734	2.06437	4.74e-05	0.00331908	117077_t	1509	F-box protein [Medicago truncatula]/gi	Medtr6g018360.1_F-box_protein_LC_chr6:7027741-7024525_20140818
72.1415	2.06235	8.36e-05	0.00501086	MSTRG.66323.3	767	4-hydroxy-3-methylbut-2-enyl diphosphate reductase [Medicago truncatula]/gi	Medtr4g069070.1_4-hydroxy-3-methylbut-2-enyl_diphosphate_reductase_HC_chr4:25944704-25948830_20140818
55.1857	2.06178	7.46e-05	0.00460993	MSTRG.69814.2	2138	hypothetical protein glysoja_018320 [Glycine soja]	Medtr2g092960.1_Myb/SANT-like_DNA-binding_domain_protein_LC_chr2:39569693-39563388_20140818
81.0138	2.05927	9.54e-05	0.00551514	MSTRG.89208.4	3236	structural maintenance of chromosomes protein [Medicago truncatula]/gi	Medtr1g051825.2_structural_maintenance_of_chromosomes_protein_HC_chr1:20727128-20747784_20140818
108.554	2.05925	2.48e-09	1.13e-06	MSTRG.1344.1	1016	---NA---	---NA---
110.354	2.05851	7.45e-05	0.00460604	MSTRG.45022.1	1372	replication factor-A carboxy-terminal domain protein [Medicago truncatula]/gi	Medtr4g036240.3_replication_factor-A_carboxy-terminal_domain_protein_HC_chr4:11830210-11833873_20140818
45.4275	2.05564	0.000706788	0.0231142	MSTRG.86655.3	1618	TRAF superfamily protein putative [Medicago truncatula]/gi	Medtr8g089030.2_TRAF_superfamily_protein,_putative_LC_chr8:37006804-36995677_20140818
94.5773	2.05504	5.24e-07	9.96e-05	MSTRG.86196.6	1674	tyrosine specific protein phosphatase family protein [Medicago truncatula]/gi	Medtr4g132810.1_tyrosine_specific_protein_phosphatase_family_protein_HC_chr4:55548045-55544901_20140818
86.4932	2.05389	1.44e-05	0.00135502	74586_t	1683	PREDICTED: uncharacterized protein LOC101492457 isoform X1 [Cicer arietinum]	Medtr3g011100.1_F-box_and_associated_interaction_domain_protein_HC_chr3:2698683-2696484_20140818
56.9486	2.05125	1.08e-06	0.000180735	MSTRG.54924.5	1418	---NA---	---NA---
32.8677	2.05118	0.000670631	0.022321	MSTRG.86073.9	412	---NA---	---NA---
56.2814	2.05077	4.81e-05	0.00334723	MSTRG.54860.1	3288	paired amphipathic helix SIN3-like protein [Medicago truncatula]/gi	Medtr8g062700.2_paired_amphipathic_helix_SIN3-like_protein_HC_chr8:26215827-26198402_20140818
53.5632	2.05029	6.81e-05	0.00433052	115589_t	5010	disease resistance protein (CC-NBS-LRR class) family protein [Medicago truncatula]/gi	Medtr2g071850.1_disease_resistance_protein_(CC-NBS-LRR_class)_family_protein_LC_chr2:30020376-30026148_20140818
72.7911	2.04663	2.36e-09	1.09e-06	MSTRG.67534.12	2176	hypothetical protein TSUD_392200 [Trifolium subterraneum]	Medtr1g078040.2_nucleoporin_autopeptidase_HC_chr1:34898558-34890792_20140818
35.4223	2.04539	0.00133203	0.0353381	MSTRG.47427.1	287	---NA---	---NA---
38.1937	2.0423	0.000288455	0.0123522	MSTRG.54799.1	1469	MADS-SRF-like domain protein [Medicago truncatula]/gi	Medtr2g049630.1_MADS-SRF-like_domain_protein_LC_chr2:21875850-21876962_20140818
52.4965	2.04146	0.000977242	0.0286898	MSTRG.37071.3	1055	MAP kinase kinase [Medicago truncatula]/gi	Medtr6g005210.1_MAP_kinase_kinase_HC_chr6:656528-650537_20140818
167.568	2.0384	9.65e-07	0.00016399	MSTRG.70088.2	888	hypothetical protein TSUD_320930 [Trifolium subterraneum]	Medtr1g492690.1_hypothetical_protein_HC_chr1:41541171-41539306_20140818
52.5166	2.03277	1.77e-05	0.00159236	MSTRG.85792.3	1645	Dil domain myosin family protein [Medicago truncatula]/gi	Medtr1g080600.1_Dil_domain_myosin_family_protein_HC_chr1:35834916-35819927_20140818
102.104	2.02944	3.29e-06	0.000432001	MSTRG.85508.5	1394	PPR containing plant protein [Medicago truncatula]/gi	Medtr6g024415.1_PPR_containing_plant_protein_LC_chr6:8744390-8743759_20140818
50.2062	2.02926	9.6e-05	0.00553978	MSTRG.19044.2	1278	Nse4 component of Smc5/6 DNA repair complex protein [Medicago truncatula]/gi	Medtr7g093090.1_Nse4,_component_of_Smc5/6_DNA_repair_complex_protein_HC_chr7:36968665-36972152_20140818
84.3865	2.02865	0.000221814	0.0102335	MSTRG.89208.3	3694	structural maintenance of chromosomes protein [Medicago truncatula]/gi	Medtr1g051825.2_structural_maintenance_of_chromosomes_protein_HC_chr1:20727128-20747784_20140818
64.0731	2.02838	0.000125683	0.00681282	MSTRG.74812.1	623	---NA---	---NA---
98.0825	2.025	0.000136167	0.00719972	MSTRG.67669.1	303	hypothetical protein MtrDRAFT_AC151522g27v2 [Medicago truncatula]	Medtr7g098020.1_transmembrane_protein,_putative_LC_chr7:39171589-39171404_20140818
206.67	2.02453	1.09e-05	0.00109313	39316_t	1341	cinnamyl alcohol dehydrogenase [Medicago truncatula]/gi	Medtr8g062440.2_cinnamyl_alcohol_dehydrogenase_HC_chr8:26099824-26105437_20140818
40.382	2.02447	0.00198013	0.0461162	MSTRG.85508.13	1405	PPR containing plant protein [Medicago truncatula]/gi	Medtr6g024415.1_PPR_containing_plant_protein_LC_chr6:8744390-8743759_20140818
58.2053	2.02433	0.00112983	0.0316266	120448_t	2517	F-box/FBD/LRR protein [Medicago truncatula]/gi	Medtr7g087840.1_F-box/FBD/LRR_protein_LC_chr7:34145858-34152025_20140818
112.289	2.02314	5.43e-05	0.00365075	MSTRG.45022.2	1334	replication factor-A carboxy-terminal domain protein [Medicago truncatula]/gi	Medtr4g036240.3_replication_factor-A_carboxy-terminal_domain_protein_HC_chr4:11830210-11833873_20140818
44.1781	2.02292	3.65e-05	0.00275618	MSTRG.59934.4	1691	LRR and NB-ARC domain disease resistance protein [Medicago truncatula]/gi	Medtr3g023030.2_LRR_and_NB-ARC_domain_disease_resistance_protein_LC_chr3:6950560-6944672_20140818
67.8791	2.02229	6.55e-05	0.0041964	MSTRG.38628.1	2683	hypothetical protein TSUD_158760 [Trifolium subterraneum]	Medtr2g092960.1_Myb/SANT-like_DNA-binding_domain_protein_LC_chr2:39569693-39563388_20140818
42.6425	2.02187	8.87e-05	0.00521758	66811_t	621	PREDICTED: mitochondrial fission 1 protein A-like [Nicotiana tabacum]/gi	Medtr7g090210.1_fission_1_protein_HC_chr7:35407799-35411234_20140818
201.551	2.02119	2.98e-07	6.32e-05	MSTRG.55008.1	1327	PREDICTED: trafficking protein particle complex subunit 1 [Cicer arietinum]/gi	Medtr8g095450.1_trafficking_protein_particle_complex_subunit-like_protein_HC_chr8:39949424-39945171_20140818
45.2608	2.01681	0.000422297	0.0162139	MSTRG.54803.1	1033	alpha-mannosidase 2x-like protein [Medicago truncatula]/gi	Medtr6g008850.1_alpha-mannosidase_2x-like_protein_HC_chr6:2470136-2462153_20140818
38.1108	2.01455	0.00111058	0.0312427	MSTRG.17579.13	1873	calcium-binding EF hand protein [Medicago truncatula]/gi	Medtr3g054210.1_calcium-binding_EF_hand_protein_HC_chr3:21497880-21502475_20140818
256.566	2.01401	5.36e-06	0.00063335	MSTRG.43380.9	1066	---NA---	---NA---
43.1821	2.01338	6.81e-05	0.00433052	MSTRG.70123.3	621	stress up-regulated Nod 19 protein [Medicago truncatula]/gi	Medtr2g030480.1_stress_up-regulated_Nod_19_protein_LC_chr2:11484809-11486640_20140818
40.5399	2.00834	4.68e-05	0.00328356	115772_t	648	receptor-like protein [Medicago truncatula]/gi	Medtr3g027330.1_receptor-like_protein_LC_chr3:8525327-8522316_20140818
95.3625	2.00624	0.0010861	0.0307534	MSTRG.81037.5	798	predicted protein [Physcomitrella patens]/gi	Medtr2g070580.1_ribosomal_protein_L14p/L23e_LC_chr2:29757748-29759277_20140818
113.249	2.00288	0.000168643	0.00839004	117004_t	5718	Rpp4C4 putative [Medicago truncatula]/gi	Medtr8g059275.1_Rpp4C4,_putative_LC_chr8:20782997-20765328_20140818
124.757	2.00032	5.52e-07	0.000103686	MSTRG.70166.2	1828	calcineurin B-like protein 4-1 [Medicago truncatula]/gi	Medtr8g099575.1_calcineurin_B-like_protein_4-1_HC_chr8:42073701-42069913_20140818
84.5106	1.99888	8.59e-11	6.36e-08	MSTRG.717.1	1077	---NA---	---NA---
64.6693	1.99561	2.81e-06	0.000382943	MSTRG.86570.1	796	Ulp1 protease family carboxy-terminal domain protein [Medicago truncatula]/gi	Medtr0002s1270.1_Ulp1_protease_family,_carboxy-terminal_domain_protein_HC_scaffold0002:485787-483700_20140818
109.572	1.99479	2.95e-05	0.00234537	MSTRG.43380.12	1022	---NA---	---NA---
204.531	1.99416	2.2e-06	0.000314168	42156_t	882	hypothetical protein MTR_8g096660 [Medicago truncatula]/gi	Medtr8g096660.1_hypothetical_protein_LC_chr8:40544044-40545603_20140818
123.29	1.99243	1.75e-07	4.21e-05	MSTRG.22719.2	669	defender against apoptotic death-like protein [Medicago truncatula]/gi	Medtr3g023120.1_defender_against_apoptotic_death-like_protein_HC_chr3:6985226-6981467_20140818
104.022	1.99194	0.000116452	0.00640889	MSTRG.52476.1	1318	replication factor-A carboxy-terminal domain protein [Medicago truncatula]/gi	Medtr8g479260.1_replication_factor-A_carboxy-terminal_domain_protein_LC_chr8:33777150-33779789_20140818
35.6736	1.98731	0.00194877	0.0456466	MSTRG.54925.1	937	---NA---	---NA---
44.5557	1.98705	2.44e-05	0.00202446	MSTRG.67260.1	1095	limkain-B1 [Trifolium pratense]	Medtr8g033130.1_OST-HTH_associated_domain_protein_LC_chr8:12717645-12718597_20140818
127.18	1.98639	1.76e-06	0.000265202	MSTRG.13389.1	443	unknown [Medicago truncatula]	---NA---
61.5241	1.98447	6.15e-05	0.00399866	MSTRG.48713.1	3326	LRR receptor-like kinase family protein [Medicago truncatula]/gi	Medtr4g040330.1_LRR_receptor-like_kinase_family_protein_HC_chr4:14455370-14458510_20140818
42.8752	1.98218	0.00198251	0.0461302	49446_t	1383	2-succinylbenzoate-CoA ligase/peroxisomal protein [Medicago truncatula]/gi	Medtr2g030240.1_2-succinylbenzoate-CoA_ligase/peroxisomal_protein_HC_chr2:11342493-11346176_20140818
42.9569	1.98102	0.000143071	0.00743462	MSTRG.79075.1	749	---NA---	---NA---
33.916	1.97746	0.000737831	0.0237396	MSTRG.3337.2	763	xanthine dehydrogenase/oxidase [Medicago truncatula]/gi	Medtr2g098030.2_xanthine_dehydrogenase/oxidase_HC_chr2:41880005-41892749_20140818
104.354	1.97549	0.000610462	0.0208819	MSTRG.40873.4	1292	putative alpha-amylase 2 [Quercus suber]	Medtr3g062030.1_serine_transhydroxymethyltransferase_HC_chr3:27965525-27963928_20140818
343.938	1.97544	1.37e-09	6.69e-07	MSTRG.32847.5	1653	O-acetylserine (thiol) lyase [Medicago truncatula]/gi	Medtr1g081620.1_O-acetylserine_(thiol)_lyase_HC_chr1:36280172-36284490_20140818
52.7065	1.97125	0.00122436	0.0333835	MSTRG.73013.1	893	---NA---	---NA---
61.6022	1.97064	0.000646434	0.0217403	MSTRG.42041.10	1279	PREDICTED: tRNA-splicing endonuclease subunit Sen54-like isoform X1 [Cicer arietinum]/gi	Medtr8g090105.1_tRNA-splicing_endonuclease_subunit_sen54_amino-terminal_protein_HC_chr8:37741275-37738113_20140818
543.775	1.96989	0.000497267	0.0180364	MSTRG.73426.3	1220	---NA---	---NA---
136.251	1.96943	2.95e-07	6.29e-05	167776_t	2712	IMP dehydrogenase/GMP reductase related [Medicago truncatula]	Medtr3g082420.2_hypothetical_protein_HC_chr3:37203737-37205754_20140818
747.601	1.96767	0.000365326	0.0146815	MSTRG.69872.1	283	---NA---	---NA---
40.0613	1.96474	0.00145031	0.0374288	MSTRG.17579.34	1926	---NA---	Medtr4g129790.1_F0F1_ATP_synthase_subunit_gamma_HC_chr4:54097375-54102498_20140818
48.586	1.96285	3.23e-05	0.00251476	116859_t	915	replication factor-A carboxy-terminal domain protein [Medicago truncatula]/gi	Medtr4g036240.1_replication_factor-A_carboxy-terminal_domain_protein_HC_chr4:11830210-11833873_20140818
119.615	1.96195	9.13e-05	0.00533651	MSTRG.11031.1	325	hypothetical protein MtrDRAFT_AC151522g27v2 [Medicago truncatula]	Medtr7g098020.1_transmembrane_protein,_putative_LC_chr7:39171589-39171404_20140818
53.4348	1.96194	0.00143482	0.037159	MSTRG.58712.4	1693	F-box/RNI superfamily protein putative [Medicago truncatula]/gi	Medtr7g087040.1_F-box/RNI_superfamily_protein,_putative_LC_chr7:33859934-33866416_20140818
92.8329	1.96046	2.12e-07	4.85e-05	MSTRG.1642.3	655	---NA---	---NA---
93.9917	1.95917	1.94e-06	0.000285837	MSTRG.59343.14	1141	PREDICTED: NAD(P)H-dependent 6'-deoxychalcone synthase-like [Cicer arietinum]	Medtr3g083130.1_aldo/keto_reductase_family_oxidoreductase_HC_chr3:37505830-37503715_20140818
40.966	1.95348	6.68e-05	0.00425748	MSTRG.19648.5	1669	cytochrome P450 family 72 protein [Medicago truncatula]/gi	Medtr2g072340.1_cytochrome_P450_family_72_protein_HC_chr2:30434253-30437998_20140818
266.547	1.95196	5.88e-06	0.000680371	MSTRG.61341.4	1048	cinnamyl alcohol dehydrogenase [Medicago truncatula]/gi	Medtr8g062440.1_cinnamyl_alcohol_dehydrogenase_HC_chr8:26099624-26105442_20140818
38.5503	1.95135	0.000513218	0.0184091	MSTRG.15235.4	1514	hypothetical protein L195_g007647 partial [Trifolium pratense]	Medtr4g057493.1_hypothetical_protein_HC_chr4:21044673-21038663_20140818
34.9364	1.95041	9.12e-06	0.000955128	MSTRG.63401.1	216	---NA---	---NA---
29.1129	1.94903	0.00169832	0.0416969	174815_t	474	BZIP transcription factor [Medicago truncatula]/gi	Medtr5g015090.1_BZIP_transcription_factor_HC_chr5:5189537-5188798_20140818
79.5919	1.94549	0.00214379	0.0486266	84464_t	6576	disease resistance protein (CC-NBS-LRR class) family protein [Medicago truncatula]/gi	Medtr2g071850.1_disease_resistance_protein_(CC-NBS-LRR_class)_family_protein_LC_chr2:30020376-30026148_20140818
712.429	1.94049	0.000153443	0.00782734	66807_t	624	transmembrane protein putative [Medicago truncatula]/gi	Medtr5g036520.1_transmembrane_protein,_putative_LC_chr5:15935958-15934992_20140818
47.8023	1.93994	0.00011114	0.00618463	MSTRG.17579.27	2496	calcium-binding EF hand protein [Medicago truncatula]/gi	Medtr3g054210.1_calcium-binding_EF_hand_protein_HC_chr3:21497880-21502475_20140818
281.854	1.93882	1.08e-06	0.000180735	MSTRG.61341.3	980	cinnamyl alcohol dehydrogenase [Medicago truncatula]/gi	Medtr8g062440.1_cinnamyl_alcohol_dehydrogenase_HC_chr8:26099624-26105442_20140818
79.098	1.93812	7.33e-05	0.00456402	MSTRG.70166.5	1028	calcineurin B-like protein 4-1 [Medicago truncatula]/gi	Medtr8g099575.1_calcineurin_B-like_protein_4-1_HC_chr8:42073701-42069913_20140818
772.599	1.93749	8.93e-11	6.59e-08	53431_t	1575	plant/F10M23-360 protein [Medicago truncatula]/gi	Medtr5g036420.1_plant/F10M23-360_protein_HC_chr5:15875140-15868742_20140818
36.7176	1.93675	0.000531275	0.0188689	122199_t	1296	MADS-SRF-like domain protein [Medicago truncatula]/gi	Medtr2g049630.1_MADS-SRF-like_domain_protein_LC_chr2:21875850-21876962_20140818
198.114	1.93611	6.46e-10	3.51e-07	142875_t	300	---NA---	---NA---
83.9912	1.93413	0.000864382	0.0264064	MSTRG.20699.5	956	---NA---	---NA---
114.619	1.93336	1.61e-05	0.00148181	56166_t	4416	disease resistance protein (TIR-NBS-LRR class) [Medicago truncatula]/gi	Medtr5g090940.1_disease_resistance_protein_(TIR-NBS-LRR_class)_HC_chr5:39619088-39625198_20140818
500.112	1.93109	0.000492699	0.0179433	MSTRG.73426.2	773	---NA---	---NA---
73.498	1.92928	6.09e-08	1.77e-05	88169_t	3009	WD40-like [Medicago truncatula]/gi	Medtr7g078170.1_RIC1-like_protein_HC_chr7:29558486-29569548_20140818
89.6263	1.92818	2.54e-05	0.00208965	MSTRG.70166.1	1279	calcineurin B-like protein 4-1 [Medicago truncatula]/gi	Medtr8g099575.1_calcineurin_B-like_protein_4-1_HC_chr8:42073701-42069913_20140818
185.028	1.92304	5.62e-06	0.000657676	MSTRG.27521.4	2185	PREDICTED: LOW QUALITY PROTEIN: 65-kDa microtubule-associated protein 1-like [Vitis vinifera]	Medtr5g093860.1_microtubule_associated_protein,_MAP65/ASE1_family_protein_HC_chr5:40981176-40985866_20140818
82.399	1.9228	0.000631564	0.0214146	MSTRG.65869.1	1454	hypothetical protein TSUD_330940 [Trifolium subterraneum]	Medtr8g090105.1_tRNA-splicing_endonuclease_subunit_sen54_amino-terminal_protein_HC_chr8:37741275-37738113_20140818
83.7289	1.92279	1.55e-05	0.00144134	179579_t	5820	PREDICTED: uncharacterized protein LOC102595311 [Solanum tuberosum]	Medtr8g079940.1_two-component_response_regulator_ARR2-like_protein_HC_chr8:34314993-34318731_20140818
308.325	1.92116	3.48e-06	0.000450377	MSTRG.61341.2	1296	cinnamyl alcohol dehydrogenase [Medicago truncatula]/gi	Medtr8g062440.3_cinnamyl_alcohol_dehydrogenase_HC_chr8:26099734-26103927_20140818
55.9605	1.92072	0.00167172	0.0412695	MSTRG.47607.1	319	---NA---	---NA---
65.6845	1.91942	0.00057183	0.0199166	MSTRG.65869.6	1361	hypothetical protein TSUD_330940 [Trifolium subterraneum]	Medtr8g090105.1_tRNA-splicing_endonuclease_subunit_sen54_amino-terminal_protein_HC_chr8:37741275-37738113_20140818
81.7224	1.91871	0.00011027	0.00615244	MSTRG.70094.1	1731	2-succinylbenzoate-CoA ligase/peroxisomal protein [Medicago truncatula]/gi	Medtr2g030240.1_2-succinylbenzoate-CoA_ligase/peroxisomal_protein_HC_chr2:11342493-11346176_20140818
142.046	1.91859	8.76e-05	0.00517341	MSTRG.22721.8	2767	LRR and NB-ARC domain disease resistance protein [Medicago truncatula]/gi	Medtr0425s0020.1_LRR_and_NB-ARC_domain_disease_resistance_protein_LC_scaffold0425:6387-10157_20140818
49.9973	1.91778	0.000218099	0.0101133	MSTRG.22748.1	305	---NA---	---NA---
98.0434	1.91446	7.08e-12	7.12e-09	MSTRG.86196.12	1358	global transcription factor [Medicago truncatula]/gi	Medtr7g088700.1_global_transcription_factor_HC_chr7:34591539-34580098_20140818
92.9205	1.91111	0.00199914	0.0464265	MSTRG.20699.2	1273	PREDICTED: uncharacterized protein LOC108321544 isoform X2 [Vigna angularis]	Medtr4g129150.1_YaeB/AF-0241_family_methyltransferase,_putative_HC_chr4:53769515-53765085_20140818
75.24	1.91089	0.000774431	0.0245	MSTRG.65869.2	1347	hypothetical protein TSUD_330940 [Trifolium subterraneum]	Medtr8g090105.1_tRNA-splicing_endonuclease_subunit_sen54_amino-terminal_protein_HC_chr8:37741275-37738113_20140818
44.6767	1.90971	0.00013584	0.00719101	MSTRG.304.1	942	alpha-galactosidase [Medicago truncatula]/gi	Medtr8g089740.1_alpha-galactosidase_HC_chr8:37374298-37378051_20140818
376.352	1.90935	7.22e-05	0.00450569	MSTRG.49994.1	863	---NA---	---NA---
38.4829	1.90898	0.000139794	0.00732755	MSTRG.55542.2	507	---NA---	---NA---
46.0221	1.90796	0.00112744	0.0315908	MSTRG.71358.5	513	hypothetical protein MTR_8g016250 [Medicago truncatula]/gi	Medtr8g016250.1_hypothetical_protein_HC_chr8:5463605-5463811_20140818
37.7577	1.90684	0.000200967	0.00955916	MSTRG.70166.6	1859	calcineurin B-like protein 4-1 [Medicago truncatula]/gi	Medtr8g099575.1_calcineurin_B-like_protein_4-1_HC_chr8:42073701-42069913_20140818
96.6949	1.90611	7.83e-06	0.000843716	MSTRG.1642.4	742	---NA---	---NA---
89.8569	1.90293	2.04e-06	0.000296058	MSTRG.1343.2	923	---NA---	Medtr2g055850.1_DEAD-box_ATP-dependent_RNA_helicase-like_protein_HC_chr2:23956977-23948909_20140818
69.1348	1.9029	0.000378131	0.0150323	MSTRG.51309.2	546	transmembrane protein putative [Medicago truncatula]/gi	Medtr2g026240.1_transmembrane_protein,_putative_LC_chr2:9562121-9560946_20140818
111.991	1.90212	1.81e-05	0.00161771	MSTRG.86067.6	1553	lipase [Medicago truncatula]/gi	Medtr3g069720.1_lipase_HC_chr3:31213780-31210849_20140818
67.5445	1.90018	1.77e-06	0.000266154	135341_t	4431	ABC transporter B family-like protein [Medicago truncatula]/gi	Medtr8g022270.1_ABC_transporter_B_family-like_protein_HC_chr8:7869135-7861470_20140818
52.9833	1.89952	5.99e-06	0.00068837	MSTRG.85742.5	681	zinc induced facilitator-like protein [Medicago truncatula]/gi	Medtr3g010850.2_zinc_induced_facilitator-like_protein_LC_chr3:2619747-2625343_20140818
125.681	1.89901	0.000225838	0.0103697	MSTRG.60030.1	701	---NA---	---NA---
66.3325	1.89841	0.000369358	0.0147974	139589_t	1464	nonsense-mediated mRNA decay NMD3 family protein [Medicago truncatula]/gi	Medtr4g107030.1_nonsense-mediated_mRNA_decay_NMD3_family_protein_HC_chr4:43995360-43996798_20140818
82.0084	1.88958	0.000194127	0.00930524	MSTRG.73146.4	884	glutamyl-tRNA synthetase [Medicago truncatula]/gi	Medtr8g009900.1_glutamyl-tRNA_synthetase_HC_chr8:2456519-2462483_20140818
63.7406	1.88556	0.0002508	0.0111544	MSTRG.33046.1	382	---NA---	---NA---
60.3299	1.88531	0.00102776	0.029667	49104_t	1071	hypothetical protein TSUD_414910 [Trifolium subterraneum]	Medtr7g046380.1_Ulp1_protease_family,_carboxy-terminal_domain_protein_HC_chr7:16432801-16434835_20140818
54.9393	1.88517	0.00163754	0.040734	MSTRG.85677.5	863	PREDICTED: protein ENHANCED DISEASE RESISTANCE 2-like isoform X1 [Lupinus angustifolius]/gi	Medtr2g094620.3_pleckstrin-like_(PH)_and_lipid-binding_START_domain_protein_HC_chr2:40402583-40393528_20140818
37.6236	1.8848	0.000143131	0.00743462	MSTRG.85742.3	882	zinc induced facilitator-like protein [Medicago truncatula]/gi	Medtr3g010850.1_zinc_induced_facilitator-like_protein_LC_chr3:2619747-2625343_20140818
48.7136	1.88394	1.28e-05	0.00123409	125486_t	4695	nucleoporin autopeptidase putative [Medicago truncatula]/gi	Medtr1g078050.1_nucleoporin_autopeptidase,_putative_HC_chr1:34911997-34904633_20140818
59.3253	1.88308	6.67e-05	0.00425472	MSTRG.67260.2	1113	limkain-B1 [Trifolium pratense]	Medtr7g077430.1_endonuclease_or_glycosyl_hydrolase_LC_chr7:29250695-29255187_20140818
43.7633	1.88214	0.00124217	0.0337269	MSTRG.71975.1	2422	P-loop nucleoside triphosphate hydrolase superfamily protein [Medicago truncatula]/gi	Medtr8g098230.1_P-loop_nucleoside_triphosphate_hydrolase_superfamily_protein_HC_chr8:40988299-40979942_20140818
39.9174	1.88115	0.000457818	0.0170824	MSTRG.70469.3	434	---NA---	Medtr4g064020.1_core_histone_H2A/H2B/H3/H4_HC_chr4:23885563-23886484_20140818
313.54	1.87651	1.31e-05	0.00125358	MSTRG.20666.3	495	transmembrane protein putative [Medicago truncatula]/gi	Medtr3g016080.1_transmembrane_protein,_putative_LC_chr3:4763213-4761952_20140818
51.0677	1.87552	6.56e-05	0.0042014	MSTRG.73290.1	293	---NA---	---NA---
135.225	1.87183	0.000528303	0.0188056	90667_t	1308	replication factor-A carboxy-terminal domain protein [Medicago truncatula]/gi	Medtr8g479260.1_replication_factor-A_carboxy-terminal_domain_protein_LC_chr8:33777150-33779789_20140818
55.0996	1.8713	6.6e-05	0.00422053	MSTRG.45046.4	1152	unknown [Medicago truncatula]/gi	Medtr3g111440.2_TRAF-type_zinc_finger_protein_HC_chr3:52079851-52077503_20140818
55.7469	1.87106	7.39e-05	0.00458691	MSTRG.716.2	641	---NA---	---NA---
411.802	1.87093	6.46e-12	6.62e-09	MSTRG.44802.5	2589	unknown [Medicago truncatula]	Medtr1g075310.1_TPX2_(targeting_protein_for_Xklp2)_family_protein_HC_chr1:33342141-33338595_20140818
462.106	1.86591	5.39e-05	0.00363217	MSTRG.49994.2	702	---NA---	---NA---
35.7494	1.86459	0.0019304	0.0453672	MSTRG.81675.1	8635	hypothetical protein TSUD_21830 [Trifolium subterraneum]	Medtr3g093120.1_SPFH_domain/band_7_family_protein_LC_chr3:42570339-42574091_20140818
63.9017	1.8632	0.00132475	0.0352392	10405_t	501	60S ribosomal L12-like protein [Medicago truncatula]/gi	Medtr2g094300.1_60S_ribosomal_L12-like_protein_HC_chr2:40220337-40219829_20140818
84.7001	1.86187	5.63e-06	0.000657877	MSTRG.43840.1	511	---NA---	---NA---
35.854	1.85983	0.00211911	0.048243	MSTRG.22803.2	883	hypothetical protein TSUD_376160 [Trifolium subterraneum]	Medtr3g088575.1_NAD/NADH_kinase_family_protein_HC_chr3:40305167-40299238_20140818
108.308	1.85638	5.57e-06	0.000653484	168682_t	2349	LRR and NB-ARC domain disease resistance protein putative [Medicago truncatula]/gi	Medtr7g018810.1_LRR_and_NB-ARC_domain_disease_resistance_protein,_putative_LC_chr7:6211389-6206309_20140818
77.8213	1.85464	0.000130781	0.00699615	MSTRG.42041.12	1799	PREDICTED: tRNA-splicing endonuclease subunit Sen54-like isoform X1 [Cicer arietinum]/gi	Medtr8g090105.1_tRNA-splicing_endonuclease_subunit_sen54_amino-terminal_protein_HC_chr8:37741275-37738113_20140818
74.8582	1.85237	6.94e-05	0.00437932	MSTRG.30680.1	305	glutamate-ammonia ligase-like protein [Medicago truncatula]/gi	Medtr3g035970.3_glutamate-ammonia_ligase-like_protein_HC_chr3:13353643-13361176_20140818
35.0748	1.85201	0.000899538	0.0270651	78535_t	2052	DUF223 domain protein [Medicago truncatula]/gi	Medtr1g052715.1_DUF223_domain_protein_LC_chr1:21677037-21675057_20140818
48.3156	1.85123	0.00105027	0.030098	MSTRG.86655.4	1674	TRAF superfamily protein putative [Medicago truncatula]/gi	Medtr8g089030.2_TRAF_superfamily_protein,_putative_LC_chr8:37006804-36995677_20140818
129.539	1.85109	1.38e-06	0.000218841	MSTRG.50442.1	1316	SAM (and some other nucleotide) binding motif [Medicago truncatula]/gi	Medtr7g090180.1_S-adenosylmethionine-dependent_methyltransferase_HC_chr7:35398677-35400589_20140818
44.4318	1.85029	0.000552552	0.0194419	MSTRG.70469.2	454	---NA---	Medtr4g064020.1_core_histone_H2A/H2B/H3/H4_HC_chr4:23885563-23886484_20140818
81.1164	1.84917	0.00152252	0.0386372	MSTRG.54129.1	365	---NA---	---NA---
86.8985	1.84885	0.00083338	0.0257292	MSTRG.33418.4	1297	---NA---	---NA---
597.629	1.84818	1.28e-08	4.62e-06	MSTRG.4874.1	287	---NA---	---NA---
92.4393	1.84596	2.77e-07	5.98e-05	MSTRG.86196.9	1543	tyrosine specific protein phosphatase family protein [Medicago truncatula]/gi	Medtr4g132810.1_tyrosine_specific_protein_phosphatase_family_protein_HC_chr4:55548045-55544901_20140818
41.3265	1.84587	0.000105423	0.00594554	91152_t	4608	AP2-like ethylene-responsive transcription factor [Medicago truncatula]/gi	Medtr4g097520.1_AP2-like_ethylene-responsive_transcription_factor_HC_chr4:40188319-40192060_20140818
80.0416	1.84433	0.00137265	0.0360496	MSTRG.38425.1	240	hypothetical protein MtrDRAFT_AC151522g27v2 [Medicago truncatula]	Medtr7g098020.1_transmembrane_protein,_putative_LC_chr7:39171589-39171404_20140818
211.533	1.84428	3.77e-07	7.66e-05	MSTRG.86067.12	1230	DnaJ-class molecular chaperone [Medicago truncatula]/gi	Medtr2g087660.1_DnaJ-class_molecular_chaperone_HC_chr2:36877846-36880571_20140818
73.712	1.84197	0.000796218	0.0249498	187647_t	1104	cathepsin propeptide inhibitor domain protein [Medicago truncatula]/gi	Medtr6g087720.1_cathepsin_propeptide_inhibitor_domain_protein_LC_chr6:33004154-33003216_20140818
37.9862	1.8399	0.000263271	0.0115346	85682_t	1857	heat shock 70 kDa protein [Medicago truncatula]/gi	Medtr2g032550.1_heat_shock_70_kDa_protein_HC_chr2:12244311-12246622_20140818
251.271	1.83961	0.000911964	0.0273117	MSTRG.46322.1	557	transmembrane protein putative [Medicago truncatula]/gi	Medtr8g010220.1_transmembrane_protein,_putative_LC_chr8:2614243-2612652_20140818
121.234	1.83909	2.31e-07	5.19e-05	MSTRG.70166.3	1814	calcineurin B-like protein 4-1 [Medicago truncatula]/gi	Medtr8g099575.1_calcineurin_B-like_protein_4-1_HC_chr8:42073701-42069913_20140818
275.899	1.83876	1.03e-07	2.73e-05	MSTRG.9371.1	1128	mitochondrial fission 1 protein A [Herrania umbratica]	Medtr7g090210.1_fission_1_protein_HC_chr7:35407799-35411234_20140818
51.984	1.83679	0.000464712	0.0172488	MSTRG.27521.13	1717	microtubule associated protein MAP65/ASE1 family protein [Medicago truncatula]/gi	Medtr5g093860.1_microtubule_associated_protein,_MAP65/ASE1_family_protein_HC_chr5:40981176-40985866_20140818
62.4026	1.83664	0.000312372	0.013097	MSTRG.69814.1	2329	hypothetical protein glysoja_018320 [Glycine soja]	Medtr2g092960.1_Myb/SANT-like_DNA-binding_domain_protein_LC_chr2:39569693-39563388_20140818
63.5422	1.83596	0.000160108	0.00806907	MSTRG.86655.11	2744	TRAF superfamily protein putative [Medicago truncatula]/gi	Medtr8g089030.1_TRAF_superfamily_protein,_putative_LC_chr8:37006804-36991603_20140818
41.0907	1.83304	0.00184179	0.0440466	56292_t	1419	stress-induced receptor-like kinase [Medicago truncatula]/gi	Medtr1g031560.1_stress-induced_receptor-like_kinase_LC_chr1:11035312-11032638_20140818
65.3949	1.83126	0.000748448	0.0239717	MSTRG.18669.7	1158	arm repeat superfamily protein [Trifolium pratense]	Medtr2g098850.2_cyclin-like_protein_HC_chr2:42329066-42318796_20140818
49.6209	1.82729	0.000867434	0.0264433	MSTRG.3337.1	865	xanthine dehydrogenase/oxidase [Medicago truncatula]/gi	Medtr2g098030.1_xanthine_dehydrogenase/oxidase_HC_chr2:41880188-41892592_20140818
368.523	1.8258	0.00033324	0.0137413	MSTRG.89080.4	497	---NA---	Medtr3g016080.1_transmembrane_protein,_putative_LC_chr3:4763213-4761952_20140818
37.2746	1.82536	2.95e-06	0.000397133	162019_t	573	F-box/RNI/FBD-like domain protein [Medicago truncatula]/gi	Medtr4g080773.1_F-box/RNI/FBD-like_domain_protein_LC_chr4:31240025-31236290_20140818
39.1121	1.8249	0.000305435	0.0128793	MSTRG.40971.4	954	potassium transporter 12 [Medicago truncatula]/gi	Medtr2g438160.1_potassium_transporter_12_HC_chr2:15394059-15398083_20140818
37.4421	1.82488	0.000358229	0.0144751	MSTRG.53742.1	1256	hypothetical protein TSUD_384210 [Trifolium subterraneum]	Medtr2g016780.1_editing_factor,_putative_HC_chr2:5197710-5195940_20140818
38.9266	1.82114	0.000322768	0.0134167	38479_t	3318	serine/threonine-protein phosphatase 7 long form-like protein [Trifolium pratense]/gi	Medtr8g088220.1_hypothetical_protein_LC_chr8:36530819-36531108_20140818
132.946	1.81856	2e-05	0.00174216	MSTRG.61968.5	1581	cell division cycle-like protein [Medicago truncatula]/gi	Medtr6g016680.1_cell_division_cycle-like_protein_HC_chr6:6381476-6392651_20140818
65.2338	1.81781	0.000748645	0.023973	MSTRG.69416.2	1613	protein phosphatase 2C ABI2-like protein [Medicago truncatula]/gi	Medtr4g125810.1_protein_phosphatase_2C_ABI2-like_protein_HC_chr4:52220723-52217353_20140818
144.606	1.81728	0.0003344	0.0137708	MSTRG.22721.3	3033	LRR and NB-ARC domain disease resistance protein [Medicago truncatula]/gi	Medtr0425s0020.1_LRR_and_NB-ARC_domain_disease_resistance_protein_LC_scaffold0425:6387-10157_20140818
76.117	1.81608	6.35e-06	0.000718448	MSTRG.1642.1	823	hypothetical protein TSUD_92120 [Trifolium subterraneum]	Medtr8g027210.1_hypothetical_protein_LC_chr8:9511117-9510492_20140818
482.724	1.81572	1.27e-07	3.24e-05	MSTRG.86067.3	2958	lipase [Medicago truncatula]/gi	Medtr3g069720.1_lipase_HC_chr3:31213780-31210849_20140818
83.4231	1.8121	3.87e-08	1.21e-05	160786_t	6882	PREDICTED: uncharacterized protein LOC106798255 [Glycine max]	Medtr5g057040.1_F-box_protein_interaction_domain_protein_LC_chr5:23755020-23750688_20140818
159.806	1.80818	0.00042193	0.0162078	MSTRG.38506.5	2505	zinc finger BED domain-containing protein RICESLEEPER 2-like [Arachis ipaensis]	Medtr5g034530.1_hypothetical_protein_LC_chr5:14993712-14993306_20140818
264.5	1.80703	6.05e-07	0.000111649	MSTRG.27521.7	1967	microtubule-associated protein MAP65-1-like [Trifolium pratense]	Medtr5g093860.1_microtubule_associated_protein,_MAP65/ASE1_family_protein_HC_chr5:40981176-40985866_20140818
83.2726	1.8048	5.1e-05	0.0034963	MSTRG.43840.2	372	---NA---	---NA---
111.56	1.80344	3.84e-08	1.2e-05	MSTRG.15016.4	835	cinnamyl alcohol dehydrogenase [Medicago truncatula]/gi	Medtr8g062440.3_cinnamyl_alcohol_dehydrogenase_HC_chr8:26099734-26103927_20140818
43.4249	1.80322	0.000297973	0.0126532	MSTRG.83301.3	847	heavy metal-associated domain protein [Medicago truncatula]/gi	Medtr6g051690.1_heavy_metal-associated_domain_protein_HC_chr6:17999677-18000937_20140818
39.7034	1.80098	0.00149449	0.0382122	MSTRG.2922.2	1276	LOW QUALITY PROTEIN: uncharacterized protein LOC110749042 [Prunus avium]	Medtr6g472230.1_disease_resistance_protein_(TIR-NBS-LRR_class),_putative_LC_chr6:26054240-26059623_20140818
125.808	1.79732	2.94e-06	0.000396771	MSTRG.31221.5	1266	sugar porter (SP) family MFS transporter [Medicago truncatula]/gi	Medtr4g118610.2_sugar_porter_(SP)_family_MFS_transporter_HC_chr4:49131241-49135079_20140818
79.5914	1.79603	4.41e-05	0.00315082	86807_t	1965	hypothetical protein TSUD_355350 [Trifolium subterraneum]	Medtr3g005755.1_deoxycytidylate_deaminase_(cytidine_deaminase),_putative_LC_chr3:367590-366620_20140818
703.228	1.7932	1.79e-07	4.29e-05	MSTRG.86067.7	2501	lipase [Medicago truncatula]/gi	Medtr3g069720.1_lipase_HC_chr3:31213780-31210849_20140818
99.4057	1.79308	0.00211891	0.048243	MSTRG.20699.3	1223	PREDICTED: uncharacterized protein LOC108321544 isoform X2 [Vigna angularis]	Medtr4g129150.1_YaeB/AF-0241_family_methyltransferase,_putative_HC_chr4:53769515-53765085_20140818
61.2337	1.79285	3.29e-05	0.00254658	127525_t	591	chromosome condensation regulator RCC1 repeat protein [Medicago truncatula]/gi	Medtr2g079610.1_chromosome_condensation_regulator_RCC1_repeat_protein_HC_chr2:33529723-33536433_20140818
85.9265	1.79212	2.93e-05	0.00233655	MSTRG.86196.8	1637	PREDICTED: transcription elongation factor SPT6 isoform X1 [Cicer arietinum]	Medtr7g087460.1_global_transcription_factor_HC_chr7:34038977-34042168_20140818
68.063	1.79143	0.000115423	0.00635916	MSTRG.44802.6	573	MAP kinase-binding-like protein [Medicago truncatula]/gi	Medtr7g066750.1_MAP_kinase-binding-like_protein_HC_chr7:24342725-24336872_20140818
59.1222	1.79073	2.14e-07	4.9e-05	MSTRG.65276.1	1265	F-box/LRR-repeat protein [Trifolium pratense]	Medtr3g107160.1_F-box/RNI/FBD-like_domain_protein_LC_chr3:49427732-49426375_20140818
128.922	1.78882	2.54e-07	5.58e-05	MSTRG.62946.2	1887	digalactosyldiacylglycerol synthase [Medicago truncatula]/gi	Medtr6g091670.1_digalactosyldiacylglycerol_synthase_HC_chr6:34526786-34522519_20140818
47.4682	1.78827	0.00147492	0.0378935	MSTRG.69814.4	1761	hypothetical protein glysoja_018320 [Glycine soja]	Medtr3g011560.1_TNP1-like_protein_LC_chr3:2886243-2889912_20140818
65.3254	1.78413	0.000491429	0.0179095	MSTRG.86655.9	1627	TRAF superfamily protein putative [Medicago truncatula]/gi	Medtr8g089030.2_TRAF_superfamily_protein,_putative_LC_chr8:37006804-36995677_20140818
563.06	1.78404	7.24e-05	0.00451911	MSTRG.86067.5	2703	lipase [Medicago truncatula]/gi	Medtr3g069720.1_lipase_HC_chr3:31213780-31210849_20140818
54.944	1.782	0.000286564	0.0123195	MSTRG.27592.2	1356	hypothetical protein MTR_4g124820 [Medicago truncatula]/gi	Medtr4g124820.1_hypothetical_protein_HC_chr4:51742437-51745498_20140818
269.489	1.78011	1.12e-06	0.000186214	20209_t	3972	receptor-like protein [Medicago truncatula]/gi	Medtr4g032320.1_receptor-like_protein_LC_chr4:11120640-11117356_20140818
130.675	1.77944	5.16e-08	1.54e-05	MSTRG.37583.6	871	DnaJ-class molecular chaperone [Medicago truncatula]/gi	Medtr2g087660.1_DnaJ-class_molecular_chaperone_HC_chr2:36877846-36880571_20140818
161.818	1.77898	4.98e-09	2.02e-06	MSTRG.86196.7	1563	global transcription factor [Medicago truncatula]/gi	Medtr7g088700.1_global_transcription_factor_HC_chr7:34591539-34580098_20140818
136.752	1.77842	3.5e-08	1.1e-05	MSTRG.39415.6	2415	cysteine-rich receptor-like kinase [Medicago truncatula]/gi	Medtr8g041880.1_cysteine-rich_receptor-like_kinase_HC_chr8:15802331-15798924_20140818
46.2436	1.7773	2.59e-05	0.00212374	MSTRG.81006.4	494	---NA---	---NA---
99.3074	1.77715	7.52e-05	0.00463795	88170_t	5559	disease resistance protein (TIR-NBS-LRR class) putative [Medicago truncatula]/gi	Medtr7g078180.1_disease_resistance_protein_(TIR-NBS-LRR_class),_putative_LC_chr7:29570689-29575843_20140818
37.1936	1.7767	0.00079063	0.0248602	MSTRG.24429.1	280	ubiquitin-activating enzyme E1 1 [Medicago truncatula]/gi	Medtr5g072480.3_ubiquitin-activating_enzyme_E1_1_HC_chr5:30837418-30830993_20140818
261.189	1.77643	1.34e-06	0.000214042	85286_t	1521	protein disulfide isomerase (PDI)-like protein [Medicago truncatula]/gi	Medtr8g064840.1_protein_disulfide_isomerase_(PDI)-like_protein_HC_chr8:27209650-27211771_20140818
316.157	1.77556	0.000778722	0.0245805	MSTRG.82288.8	1827	adenine nucleotide alpha hydrolase superfamily protein [Medicago truncatula]/gi	Medtr1g054765.1_adenine_nucleotide_alpha_hydrolase_superfamily_protein_HC_chr1:23937943-23936722_20140818
986.18	1.77548	0.000272404	0.0118676	64793_t	768	unknown [Medicago truncatula]	Medtr3g054170.1_legume_lectin_beta_domain_protein_HC_chr3:21482455-21483222_20140818
100.042	1.77389	0.000116919	0.00643001	MSTRG.1879.2	1752	sugar porter (SP) family MFS transporter [Medicago truncatula]/gi	Medtr4g118610.2_sugar_porter_(SP)_family_MFS_transporter_HC_chr4:49131241-49135079_20140818
41.9103	1.77151	3.29e-06	0.000432001	MSTRG.77920.6	1089	hypothetical protein MTR_1g041635 [Medicago truncatula]/gi	Medtr1g041635.1_hypothetical_protein_HC_chr1:15617639-15618322_20140818
102.951	1.76783	6.24e-07	0.000114358	MSTRG.45033.1	816	transmembrane protein putative [Medicago truncatula]/gi	Medtr8g020470.3_transmembrane_protein,_putative_LC_chr8:7181240-7185722_20140818
65.8149	1.76408	0.000308538	0.0129819	182863_t	1506	cytochrome P450 family protein [Medicago truncatula]/gi	Medtr4g078110.1_cytochrome_P450_family_protein_HC_chr4:29975536-29972262_20140818
558.654	1.7622	4.14e-07	8.18e-05	MSTRG.86067.4	2776	lipase [Medicago truncatula]/gi	Medtr3g069720.1_lipase_HC_chr3:31213780-31210849_20140818
123.445	1.76214	0.00102924	0.0296978	MSTRG.22721.10	2878	LRR and NB-ARC domain disease resistance protein [Medicago truncatula]/gi	Medtr0425s0020.1_LRR_and_NB-ARC_domain_disease_resistance_protein_LC_scaffold0425:6387-10157_20140818
87.1257	1.76142	2.47e-06	0.000344624	MSTRG.55898.2	224	aspartic protease family protein putative [Medicago truncatula]/gi	Medtr5g080330.1_aspartic_protease_family_protein,_putative_LC_chr5:34380900-34377963_20140818
48.9802	1.76062	0.000277075	0.0120137	MSTRG.30458.1	579	---NA---	---NA---
146.429	1.75999	7.38e-09	2.84e-06	MSTRG.11957.1	877	receptor-like protein [Medicago truncatula]/gi	Medtr3g027330.1_receptor-like_protein_LC_chr3:8525327-8522316_20140818
83.8393	1.7595	0.000829458	0.0256387	MSTRG.39060.1	808	thioredoxin s1 [Medicago truncatula]	Medtr2g079400.1_thioredoxin_HC_chr2:33415050-33415571_20140818
53.8372	1.7557	6.49e-07	0.000117866	MSTRG.67534.13	1847	hypothetical protein TSUD_392200 [Trifolium subterraneum]	Medtr1g078040.2_nucleoporin_autopeptidase_HC_chr1:34898558-34890792_20140818
54.4846	1.75563	0.00142441	0.0370141	MSTRG.17239.5	2372	Dil domain myosin family protein [Medicago truncatula]/gi	Medtr1g080600.1_Dil_domain_myosin_family_protein_HC_chr1:35834916-35819927_20140818
61.7842	1.7555	0.000145481	0.00751685	181931_t	747	DUF1645 family protein [Medicago truncatula]/gi	Medtr5g034230.1_DUF1645_family_protein_HC_chr5:14812020-14813139_20140818
53.5955	1.75458	0.000359935	0.014524	MSTRG.59343.10	897	PREDICTED: NAD(P)H-dependent 6'-deoxychalcone synthase-like [Cicer arietinum]	Medtr3g083130.1_aldo/keto_reductase_family_oxidoreductase_HC_chr3:37505830-37503715_20140818
215.655	1.74939	9.32e-05	0.00541889	MSTRG.58349.2	604	hypothetical protein MTR_6g090460 [Medicago truncatula]/gi	Medtr6g090460.1_hypothetical_protein_HC_chr6:34039171-34037721_20140818
357.44	1.74826	2.5e-08	8.28e-06	MSTRG.44802.2	3133	TPX2 (targeting protein for Xklp2) family protein [Medicago truncatula]/gi	Medtr1g075310.1_TPX2_(targeting_protein_for_Xklp2)_family_protein_HC_chr1:33342141-33338595_20140818
48.1846	1.74675	0.001206	0.0330625	MSTRG.716.3	505	---NA---	---NA---
286.285	1.74653	1.09e-07	2.86e-05	MSTRG.44802.3	2790	TPX2 (targeting protein for Xklp2) family protein [Medicago truncatula]/gi	Medtr1g075310.1_TPX2_(targeting_protein_for_Xklp2)_family_protein_HC_chr1:33342141-33338595_20140818
70.3232	1.74593	1.47e-08	5.24e-06	MSTRG.42934.1	387	hypothetical protein MTR_1g031230 [Medicago truncatula]/gi	Medtr1g031230.1_hypothetical_protein_HC_chr1:10907224-10907397_20140818
57.1103	1.7455	0.000424451	0.0162604	23174_t	906	Cytochrome cd1-nitrite reductase-like C-terminal haem d1 [Medicago truncatula]	Medtr7g451160.1_hypothetical_protein_LC_chr7:17166883-17166125_20140818
391.635	1.74321	9.56e-07	0.000162871	MSTRG.43380.7	1051	extensin-like region protein [Medicago truncatula]/gi	Medtr4g065113.1_extensin-like_region_protein_LC_chr4:24482862-24481165_20140818
173.458	1.742	4.78e-05	0.00333085	MSTRG.27521.9	1422	PREDICTED: LOW QUALITY PROTEIN: 65-kDa microtubule-associated protein 1-like [Vitis vinifera]	Medtr5g093860.1_microtubule_associated_protein,_MAP65/ASE1_family_protein_HC_chr5:40981176-40985866_20140818
74.5077	1.7401	0.000186211	0.00901225	MSTRG.32328.3	612	hypothetical protein MTR_6g021860 [Medicago truncatula]/gi	Medtr6g021860.1_hypothetical_protein_LC_chr6:7558677-7559188_20140818
178.966	1.73978	6.58e-09	2.59e-06	MSTRG.69867.6	1585	transmembrane amino acid transporter family protein [Medicago truncatula]/gi	Medtr5g083760.1_transmembrane_amino_acid_transporter_family_protein_HC_chr5:36131798-36134727_20140818
67.6849	1.73858	4.98e-05	0.00342962	MSTRG.71204.1	470	---NA---	---NA---
40.8706	1.73822	0.000644398	0.0217025	MSTRG.38327.2	823	tyrosine kinase family protein [Medicago truncatula]/gi	Medtr7g015800.2_tyrosine_kinase_family_protein_LC_chr7:4927048-4929722_20140818
44.6094	1.73269	6.43e-05	0.00414337	51949_t	3384	hypothetical protein L195_g008899 [Trifolium pratense]	Medtr5g061300.1_hypothetical_protein_LC_chr5:25477205-25475100_20140818
74.0008	1.72834	5.03e-05	0.00345849	MSTRG.85508.4	1287	PPR containing plant protein [Medicago truncatula]/gi	Medtr6g024415.1_PPR_containing_plant_protein_LC_chr6:8744390-8743759_20140818
72.3541	1.7253	4.74e-05	0.00331769	MSTRG.12485.2	3077	ABC transporter B family-like protein [Medicago truncatula]/gi	Medtr8g022270.1_ABC_transporter_B_family-like_protein_HC_chr8:7869135-7861470_20140818
361.271	1.72267	2.15e-06	0.000308047	MSTRG.43380.1	1051	extensin-like region protein [Medicago truncatula]/gi	Medtr4g065113.1_extensin-like_region_protein_LC_chr4:24482862-24481165_20140818
186.16	1.72105	0.000344934	0.0140977	MSTRG.46322.2	476	transmembrane protein putative [Medicago truncatula]/gi	Medtr8g010220.1_transmembrane_protein,_putative_LC_chr8:2614243-2612652_20140818
91.0342	1.71802	2.01e-05	0.00174859	MSTRG.75386.2	1722	BEST plant protein match is: (TAIR:plant.1) protein putative [Medicago truncatula]/gi	Medtr3g099600.1_BEST_plant_protein_match_is:_(TAIR:plant.1)_protein,_putative_HC_chr3:45661572-45658085_20140818
37.4752	1.71762	7.9e-05	0.00482079	MSTRG.11039.2	1053	---NA---	---NA---
146.495	1.71691	3.48e-05	0.00265085	MSTRG.33418.2	1815	unknown [Medicago truncatula]	Medtr8g009970.1_splicing_factor_3A_subunit_2_HC_chr8:2491922-2495853_20140818
58.2798	1.71578	1.89e-07	4.42e-05	MSTRG.65276.2	1095	F-box/LRR-repeat protein [Trifolium pratense]	Medtr3g107160.1_F-box/RNI/FBD-like_domain_protein_LC_chr3:49427732-49426375_20140818
49.3642	1.71559	0.000145512	0.00751685	119249_t	1263	cyclin-dependent kinase [Medicago truncatula]/gi	Medtr6g087920.1_cyclin-dependent_kinase_HC_chr6:33090968-33087459_20140818
108.233	1.71499	2.11e-06	0.00030368	MSTRG.82955.2	910	Pre-mRNA splicing factor [Medicago truncatula]/gi	Medtr1g072740.1_Pre-mRNA_splicing_factor_HC_chr1:32289799-32294693_20140818
37.6848	1.71482	0.000628018	0.0213457	60531_t	1428	Phosphoribosyltransferase; Orotidine 5-phosphate decarboxylase [Medicago truncatula]/gi	Medtr8g038390.1_uridine_5-monophosphate_synthase-like_protein_HC_chr8:14243549-14237808_20140818
135.377	1.71269	8.17e-05	0.00492803	MSTRG.85508.2	1428	PPR containing plant protein [Medicago truncatula]/gi	Medtr6g024415.1_PPR_containing_plant_protein_LC_chr6:8744390-8743759_20140818
311.542	1.71179	8.65e-06	0.000913335	MSTRG.27521.8	2514	microtubule associated protein MAP65/ASE1 family protein [Medicago truncatula]/gi	Medtr5g093860.1_microtubule_associated_protein,_MAP65/ASE1_family_protein_HC_chr5:40981176-40985866_20140818
82.3357	1.71149	9.77e-06	0.00100125	MSTRG.75386.1	1473	BEST plant protein match is: (TAIR:plant.1) protein putative [Medicago truncatula]/gi	Medtr3g099600.1_BEST_plant_protein_match_is:_(TAIR:plant.1)_protein,_putative_HC_chr3:45661572-45658085_20140818
96.2547	1.71073	0.000453031	0.0169477	MSTRG.2537.2	1252	---NA---	---NA---
66.97	1.7066	9.43e-07	0.000161026	MSTRG.3143.2	2420	hypothetical protein MtrDRAFT_AC150207g16v2 [Medicago truncatula]	Medtr1g018830.1_hypothetical_protein_HC_chr1:5545314-5542120_20140818
62.7957	1.7048	4.3e-05	0.00309562	MSTRG.83961.7	780	UDP-glucosyltransferase family protein [Medicago truncatula]/gi	Medtr5g072820.1_UDP-glucosyltransferase_family_protein_HC_chr5:30989979-30993244_20140818
77.6556	1.70423	1.81e-05	0.0016181	MSTRG.79331.1	352	---NA---	---NA---
140.782	1.70308	1.59e-05	0.0014676	MSTRG.25511.2	2228	LRR and NB-ARC domain disease resistance protein [Medicago truncatula]/gi	Medtr7g018850.1_LRR_and_NB-ARC_domain_disease_resistance_protein_LC_chr7:6251896-6245587_20140818
70.18	1.70265	0.000615293	0.0210072	MSTRG.61088.2	320	transmembrane protein putative [Medicago truncatula]/gi	Medtr8g014410.1_transmembrane_protein,_putative_LC_chr8:4526901-4522432_20140818
244.313	1.70261	4.87e-09	1.98e-06	MSTRG.86196.3	1934	global transcription factor [Medicago truncatula]/gi	Medtr7g088700.1_global_transcription_factor_HC_chr7:34591539-34580098_20140818
67.9679	1.70135	0.00166166	0.0411687	178082_t	1488	PREDICTED: uncharacterized protein LOC101492457 isoform X2 [Cicer arietinum]	Medtr0018s0300.1_hypothetical_protein_LC_scaffold0018:181713-179993_20140818
42.7384	1.70036	0.00195731	0.0457707	99012_t	969	PREDICTED: uncharacterized protein LOC109147764 [Ipomoea nil]	Medtr8g057120.1_hypothetical_protein_LC_chr8:18801883-18803131_20140818
288.289	1.69986	2.59e-05	0.00212374	MSTRG.58349.1	990	hypothetical protein MTR_6g090460 [Medicago truncatula]/gi	Medtr6g090460.1_hypothetical_protein_HC_chr6:34039171-34037721_20140818
105.75	1.69867	0.000395986	0.0155112	165703_t	1830	cobalamin-independent methionine synthase [Medicago truncatula]/gi	Medtr3g079640.1_cobalamin-independent_methionine_synthase_HC_chr3:35943580-35948815_20140818
34.8973	1.69698	0.000974094	0.0286191	MSTRG.54860.2	3195	paired amphipathic helix SIN3-like protein [Medicago truncatula]/gi	Medtr8g062700.2_paired_amphipathic_helix_SIN3-like_protein_HC_chr8:26215827-26198402_20140818
96.3831	1.69361	7.41e-11	5.6e-08	MSTRG.1142.11	2437	zein-binding protein [Medicago truncatula]/gi	Medtr0168s0060.1_zein-binding_protein_HC_scaffold0168:18855-21061_20140818
169.55	1.69133	1.35e-10	9.22e-08	MSTRG.66436.5	5444	histone deacetylase [Trifolium pratense]	Medtr3g118040.1_armadillo/beta-catenin-like_repeat_protein_HC_chr3:55236053-55262345_20140818
60.0891	1.69123	0.000434511	0.0164989	MSTRG.54924.2	1397	---NA---	---NA---
51.2193	1.691	0.00135212	0.0356186	61689_t	4287	disease resistance protein (TIR-NBS-LRR class) [Medicago truncatula]/gi	Medtr6g079140.1_disease_resistance_protein_(TIR-NBS-LRR_class)_HC_chr6:29804255-29799693_20140818
61.0126	1.68823	0.000327776	0.0135738	MSTRG.69356.1	1846	cytidine/deoxycytidylate deaminase family protein [Medicago truncatula]/gi	Medtr8g103020.1_cytidine/deoxycytidylate_deaminase_family_protein_HC_chr8:43383713-43390354_20140818
93.1349	1.68779	0.00170049	0.0417436	MSTRG.46543.3	1702	uncharacterized protein LOC107613253 isoform X1 [Arachis ipaensis]	Medtr3g448670.1_hypothetical_protein_LC_chr3:16368644-16367948_20140818
47.076	1.68751	0.00110609	0.0311785	MSTRG.71775.1	1289	---NA---	---NA---
47.4745	1.68598	0.00151756	0.0385795	MSTRG.23739.4	2401	PPR containing plant-like protein [Medicago truncatula]/gi	Medtr5g029690.1_PPR_containing_plant-like_protein_HC_chr5:12486752-12480740_20140818
265.891	1.68532	1.12e-05	0.00110686	MSTRG.70378.1	330	---NA---	---NA---
57.2707	1.68374	0.00142884	0.0370726	MSTRG.83792.1	3211	E3 ubiquitin-protein ligase LIN-like protein putative [Medicago truncatula]/gi	Medtr2g028940.1_E3_ubiquitin-protein_ligase_LIN-like_protein,_putative_HC_chr2:10771229-10766245_20140818
56.8304	1.68309	0.00169578	0.0416806	MSTRG.12781.7	625	---NA---	---NA---
48.1117	1.68107	0.00223587	0.049966	MSTRG.924.3	1129	nucleobase-ascorbate transporter-like protein [Medicago truncatula]/gi	Medtr3g103230.1_nucleobase-ascorbate_transporter-like_protein_HC_chr3:47578892-47582051_20140818
79.0758	1.68033	2e-07	4.61e-05	MSTRG.11569.2	633	hypothetical protein TSUD_169530 [Trifolium subterraneum]	Medtr7g021190.1_carboxy-terminal_domain_phosphatase-like_protein,_putative_HC_chr7:6664027-6656896_20140818
201.152	1.67941	7.09e-05	0.00444952	MSTRG.62629.1	1035	DnaJ-class molecular chaperone [Medicago truncatula]/gi	Medtr2g087660.1_DnaJ-class_molecular_chaperone_HC_chr2:36877846-36880571_20140818
64.0815	1.67862	0.000218026	0.0101133	MSTRG.15718.1	3018	receptor-like kinase feronia-like protein [Medicago truncatula]/gi	Medtr7g015230.1_receptor-like_kinase_feronia-like_protein_LC_chr7:4632007-4629356_20140818
590.777	1.67814	3.34e-06	0.000436884	MSTRG.43380.16	1124	extensin-like region protein [Medicago truncatula]/gi	Medtr4g065113.1_extensin-like_region_protein_LC_chr4:24482862-24481165_20140818
79.9409	1.67752	2.2e-07	5.01e-05	MSTRG.84239.3	633	hypothetical protein TSUD_169530 [Trifolium subterraneum]	Medtr7g021190.1_carboxy-terminal_domain_phosphatase-like_protein,_putative_HC_chr7:6664027-6656896_20140818
53.3507	1.67349	0.000639991	0.0216151	MSTRG.45046.5	879	unknown [Medicago truncatula]/gi	Medtr3g111440.1_TRAF-type_zinc_finger_protein_HC_chr3:52079851-52076347_20140818
58.5395	1.672	0.000216731	0.0100739	MSTRG.64230.1	2229	PREDICTED: putative pentatricopeptide repeat-containing protein At1g12700 mitochondrial [Glycine max]	Medtr0051s0090.1_pentatricopeptide_(PPR)_repeat_protein_LC_scaffold0051:44584-42871_20140818
71.87	1.67074	2.75e-07	5.96e-05	MSTRG.59187.2	524	hypothetical protein TSUD_169530 [Trifolium subterraneum]	Medtr7g021190.1_carboxy-terminal_domain_phosphatase-like_protein,_putative_HC_chr7:6664027-6656896_20140818
59.0238	1.67	8.33e-05	0.00500581	MSTRG.85233.5	1282	---NA---	---NA---
97.4263	1.66904	2.62e-05	0.00214743	MSTRG.5735.4	945	glutamyl-tRNA synthetase [Medicago truncatula]/gi	Medtr8g009900.1_glutamyl-tRNA_synthetase_HC_chr8:2456519-2462483_20140818
61.0821	1.66795	0.000372982	0.0148964	MSTRG.89421.2	1455	pleiotropic drug resistance subfamily G protein [Medicago truncatula]/gi	Medtr5g070320.1_pleiotropic_drug_resistance_subfamily_G_protein_HC_chr5:29768959-29781810_20140818
149.925	1.66593	0.00124221	0.0337269	MSTRG.2692.2	316	legume lectin beta domain protein [Medicago truncatula]/gi	Medtr1g090973.1_legume_lectin_beta_domain_protein_HC_chr1:41088570-41090016_20140818
1166.22	1.66589	0.000162039	0.00812932	MSTRG.43380.21	929	---NA---	---NA---
349.946	1.66455	1.06e-09	5.4e-07	89078_t	5283	PREDICTED: uncharacterized protein LOC101507086 [Cicer arietinum]	Medtr3g466620.1_NB-ARC_domain_disease_resistance_protein_LC_chr3:27403732-27400482_20140818
49.4638	1.66156	0.000101287	0.00578814	MSTRG.1142.9	2382	zein-binding protein [Medicago truncatula]/gi	Medtr0168s0060.1_zein-binding_protein_HC_scaffold0168:18855-21061_20140818
91.3494	1.66125	0.001192	0.0328296	MSTRG.7909.4	905	hypothetical protein TSUD_414910 [Trifolium subterraneum]	Medtr7g046380.1_Ulp1_protease_family,_carboxy-terminal_domain_protein_HC_chr7:16432801-16434835_20140818
47.7973	1.66078	0.00127975	0.0343548	MSTRG.4521.7	907	transcription factor bHLH107-like protein [Medicago truncatula]/gi	Medtr2g091190.1_transcription_factor_bHLH107-like_protein_HC_chr2:39333518-39331127_20140818
60.7883	1.65978	0.00110947	0.0312398	MSTRG.86552.1	633	---NA---	---NA---
39.3047	1.65759	0.000195274	0.0093482	MSTRG.14872.3	943	AP2-like ethylene-responsive transcription factor [Medicago truncatula]/gi	Medtr4g097520.1_AP2-like_ethylene-responsive_transcription_factor_HC_chr4:40188319-40192060_20140818
94.5766	1.65684	6.76e-05	0.00429813	MSTRG.5933.3	964	PREDICTED: protein FRA10AC1 [Cicer arietinum]	Medtr8g037265.1_folate-sensitive_fragile_site_protein_FRA10AC1_HC_chr8:13834849-13841481_20140818
384.642	1.65644	1.04e-10	7.46e-08	MSTRG.63173.18	5438	PREDICTED: uncharacterized protein LOC101507086 [Cicer arietinum]	Medtr3g466620.1_NB-ARC_domain_disease_resistance_protein_LC_chr3:27403732-27400482_20140818
84.0163	1.65624	4.02e-06	0.000503556	131100_t	1461	DUF247 domain protein [Medicago truncatula]/gi	Medtr7g060310.1_DUF247_domain_protein_LC_chr7:21785232-21787536_20140818
63.5852	1.65619	0.00146678	0.0377407	MSTRG.15709.3	1359	malonate-CoA ligase-like protein partial [Trifolium pratense]/gi	Medtr4g011790.1_fatty_acyl-CoA_synthetase_family_protein_HC_chr4:2976267-2983683_20140818
67.0238	1.6522	0.000297347	0.0126311	MSTRG.21178.1	2313	disease resistance protein (CC-NBS-LRR class) family protein [Medicago truncatula]/gi	Medtr3g012250.1_disease_resistance_protein_(CC-NBS-LRR_class)_family_protein_HC_chr3:3311630-3307751_20140818
137.692	1.65216	0.00025226	0.0111979	62088_t	1248	DUF247 domain protein [Medicago truncatula]/gi	Medtr6g009610.1_DUF247_domain_protein_LC_chr6:2926608-2927861_20140818
92.3594	1.65055	6.44e-06	0.000726101	MSTRG.54032.1	764	hypothetical protein MTR_7g017460 [Medicago truncatula]/gi	Medtr7g017460.1_hypothetical_protein_LC_chr7:5568810-5568104_20140818
196.343	1.65034	1.65e-07	4.02e-05	MSTRG.86196.5	1742	global transcription factor [Medicago truncatula]/gi	Medtr7g088700.1_global_transcription_factor_HC_chr7:34591539-34580098_20140818
84.325	1.64763	0.000346113	0.0141181	MSTRG.18669.6	1155	arm repeat superfamily protein [Trifolium pratense]	Medtr2g098850.2_cyclin-like_protein_HC_chr2:42329066-42318796_20140818
74.7753	1.64614	0.000264155	0.0115635	MSTRG.86655.8	2958	TRAF superfamily protein putative [Medicago truncatula]/gi	Medtr8g089030.1_TRAF_superfamily_protein,_putative_LC_chr8:37006804-36991603_20140818
177.172	1.64523	8.52e-06	0.000902937	MSTRG.9276.2	545	catalytic putative [Medicago truncatula]	Medtr2g039480.1_esterase/lipase/thioesterase_family_protein_HC_chr2:17302990-17297098_20140818
207.733	1.64505	7.31e-06	0.00079664	MSTRG.27521.12	1015	unnamed protein product [Coffea canephora]	Medtr5g093860.1_microtubule_associated_protein,_MAP65/ASE1_family_protein_HC_chr5:40981176-40985866_20140818
126.692	1.64473	0.000249298	0.0111142	MSTRG.5735.6	922	glutamyl-tRNA synthetase [Medicago truncatula]/gi	Medtr8g009900.1_glutamyl-tRNA_synthetase_HC_chr8:2456519-2462483_20140818
231.243	1.64457	3.16e-06	0.000418437	MSTRG.35438.6	639	GEM-like protein 4 [Vigna radiata var. radiata]	Medtr1g114640.1_GRAM_domain_protein/ABA-responsive-like_protein_HC_chr1:51754431-51753109_20140818
137.081	1.64447	1.4e-07	3.5e-05	MSTRG.21005.1	4016	WD40-like [Medicago truncatula]/gi	Medtr7g078170.1_RIC1-like_protein_HC_chr7:29558486-29569548_20140818
33.7792	1.64305	0.00189197	0.0447766	166215_t	459	PREDICTED: trafficking protein particle complex subunit 1 [Cicer arietinum]/gi	Medtr4g048530.1_trafficking_protein_particle_complex_subunit-like_protein_HC_chr4:17221969-17227053_20140818
49.4266	1.64143	0.00143538	0.0371611	MSTRG.42929.6	2020	PREDICTED: probable cyclic nucleotide-gated ion channel 20 chloroplastic [Cicer arietinum]	Medtr6g075440.1_cyclic_nucleotide_gated_channel_protein_HC_chr6:28025576-28036424_20140818
139.407	1.63734	5.84e-08	1.7e-05	MSTRG.58629.1	3129	TPX2 (targeting protein for Xklp2) family protein [Medicago truncatula]/gi	Medtr1g075310.1_TPX2_(targeting_protein_for_Xklp2)_family_protein_HC_chr1:33342141-33338595_20140818
9439.77	1.63641	0.00114665	0.0319716	139434_t	1548	hypothetical protein L195_g044676 partial [Trifolium pratense]	Medtr4g065113.1_extensin-like_region_protein_LC_chr4:24482862-24481165_20140818
66.6589	1.63598	6.81e-06	0.000758084	MSTRG.76591.6	596	hypothetical protein MTR_3g037620 [Medicago truncatula]/gi	Medtr3g037620.1_hypothetical_protein_LC_chr3:13819797-13819167_20140818
898.078	1.63539	0.000154323	0.0078645	MSTRG.9889.17	945	hypothetical protein KK1_048371 [Cajanus cajan]	---NA---
38.9922	1.63459	0.000100458	0.00574727	MSTRG.5675.3	861	---NA---	---NA---
346.723	1.63415	1.45e-08	5.15e-06	89076_t	6816	NB-ARC domain disease resistance protein [Medicago truncatula]/gi	Medtr3g062090.1_NB-ARC_domain_disease_resistance_protein_LC_chr3:27987790-28006982_20140818
40.3266	1.63359	0.000128965	0.0069277	MSTRG.82634.3	1279	50S ribosomal protein L3P [Medicago truncatula]/gi	Medtr6g006970.1_50S_ribosomal_protein_L3P_HC_chr6:1316494-1310518_20140818
83.2952	1.63194	8.53e-05	0.0050798	MSTRG.34780.5	1325	unknown [Lotus japonicus]	Medtr1g081640.1_O-acetylserine_(thiol)_lyase_HC_chr1:36291162-36294871_20140818
201.879	1.63061	0.000482024	0.0176706	MSTRG.47606.5	1600	hypothetical protein MTR_6g007360 [Medicago truncatula]/gi	Medtr6g007360.1_hypothetical_protein_HC_chr6:1576905-1572672_20140818
98.6266	1.62826	0.000111677	0.00620561	MSTRG.58380.1	1535	hypothetical protein MTR_1g492690 [Medicago truncatula]/gi	Medtr1g492690.1_hypothetical_protein_HC_chr1:41541171-41539306_20140818
1169.51	1.62693	5.69e-05	0.0037786	MSTRG.43380.8	1255	---NA---	Medtr4g065113.1_extensin-like_region_protein_LC_chr4:24482862-24481165_20140818
163.565	1.62661	6.62e-07	0.00011932	MSTRG.27521.11	1479	microtubule associated protein MAP65/ASE1 family protein [Medicago truncatula]/gi	Medtr5g093860.1_microtubule_associated_protein,_MAP65/ASE1_family_protein_HC_chr5:40981176-40985866_20140818
242.903	1.62492	1.11e-07	2.9e-05	MSTRG.66704.2	1004	nonclathrin coat protein zeta1-COP [Medicago truncatula]/gi	Medtr8g017630.1_nonclathrin_coat_protein_zeta1-COP_HC_chr8:6034186-6037629_20140818
112.294	1.62335	0.000739634	0.023773	MSTRG.53642.1	510	heterogeneous nuclear ribonucleoprotein [Medicago truncatula]/gi	Medtr8g073580.1_heterogeneous_nuclear_ribonucleoprotein_HC_chr8:31129922-31132310_20140818
139.506	1.62085	7.98e-06	0.000854485	MSTRG.45046.1	1575	unknown [Medicago truncatula]/gi	Medtr3g111440.1_TRAF-type_zinc_finger_protein_HC_chr3:52079851-52076347_20140818
182.338	1.61866	3.3e-09	1.43e-06	112786_t	402	60S ribosomal protein L32-1 [Medicago truncatula]/gi	Medtr8g085740.1_60S_ribosomal_protein_L32-1_HC_chr8:35544567-35546244_20140818
84.9066	1.61836	0.000234889	0.010662	MSTRG.3909.2	490	cationic amino acid transporter 2 vacuolar protein [Medicago truncatula]/gi	Medtr7g086610.1_cationic_amino_acid_transporter_2,_vacuolar_protein_HC_chr7:33640600-33647142_20140818
30.5232	1.61824	0.00190832	0.0450359	84085_t	2250	G-type lectin S-receptor-like Serine/Threonine-kinase SD2-5 [Medicago truncatula]/gi	Medtr2g073250.1_G-type_lectin_S-receptor-like_Serine/Threonine-kinase_SD2-5_HC_chr2:31026904-31029519_20140818
69.1107	1.61793	3.35e-05	0.00258802	43086_t	2334	hypothetical protein TSUD_354630 [Trifolium subterraneum]	Medtr8g011550.1_NB-ARC_domain_disease_resistance_protein_LC_chr8:3142903-3139894_20140818
113.767	1.61687	1.15e-07	3e-05	MSTRG.48148.2	1185	structural constituent of ribosome protein putative [Medicago truncatula]/gi	Medtr2g021040.2_structural_constituent_of_ribosome_protein,_putative_HC_chr2:7107810-7113276_20140818
59.5231	1.61458	0.000249985	0.0111353	MSTRG.85508.7	1248	PPR containing plant protein [Medicago truncatula]/gi	Medtr6g024415.1_PPR_containing_plant_protein_LC_chr6:8744390-8743759_20140818
66.5355	1.61378	0.000762654	0.0242413	MSTRG.78935.5	1828	F-box protein [Medicago truncatula]/gi	Medtr6g018360.1_F-box_protein_LC_chr6:7027741-7024525_20140818
1181.32	1.61157	0.000497347	0.0180364	112615_t	1290	extracellular dermal glycoprotein [Medicago truncatula]/gi	Medtr2g022490.1_extracellular_dermal_glycoprotein_HC_chr2:7775469-7773555_20140818
75.4386	1.61119	0.00101539	0.029414	MSTRG.78935.2	1577	F-box protein [Medicago truncatula]/gi	Medtr6g018360.1_F-box_protein_LC_chr6:7027741-7024525_20140818
43.1573	1.61012	0.000618883	0.0210949	MSTRG.46487.2	559	inosine triphosphate pyrophosphatase [Medicago truncatula]/gi	Medtr1g047390.1_inosine_triphosphate_pyrophosphatase_HC_chr1:17926945-17932743_20140818
109.413	1.60778	0.000364516	0.0146603	MSTRG.85508.1	1451	PPR containing plant protein [Medicago truncatula]/gi	Medtr6g024415.1_PPR_containing_plant_protein_LC_chr6:8744390-8743759_20140818
312.312	1.60694	0.00200561	0.0465069	MSTRG.80450.5	931	transmembrane protein putative [Medicago truncatula]/gi	Medtr4g050830.1_transmembrane_protein,_putative_HC_chr4:18049440-18049784_20140818
98.9921	1.60443	0.000537173	0.0190347	MSTRG.5933.2	1148	folate-sensitive fragile site protein FRA10AC1 [Medicago truncatula]/gi	Medtr8g037265.1_folate-sensitive_fragile_site_protein_FRA10AC1_HC_chr8:13834849-13841481_20140818
188.409	1.60298	3.55e-06	0.00045786	MSTRG.22297.1	4381	1-phosphatidylinositol phosphodiesterase-like protein [Medicago truncatula]/gi	Medtr1g060090.1_1-phosphatidylinositol_phosphodiesterase-like_protein_HC_chr1:26168868-26169821_20140818
101.763	1.60071	1.33e-06	0.000212659	MSTRG.48148.1	1151	structural constituent of ribosome protein putative [Medicago truncatula]/gi	Medtr2g021040.2_structural_constituent_of_ribosome_protein,_putative_HC_chr2:7107810-7113276_20140818
85.3027	1.59998	1.44e-06	0.000227315	19151_t	720	ubiquitin-protein ligase [Medicago truncatula]/gi	Medtr3g114990.1_ubiquitin-protein_ligase_HC_chr3:53705316-53703014_20140818
42.8131	1.59951	0.00117722	0.0325522	29879_t	498	hypothetical protein MTR_6g090460 [Medicago truncatula]/gi	Medtr6g090460.1_hypothetical_protein_HC_chr6:34039171-34037721_20140818
106.302	1.59921	0.000128587	0.00691037	MSTRG.65412.1	2005	PREDICTED: uncharacterized protein LOC108223098 isoform X6 [Daucus carota subsp. sativus]	---NA---
168.885	1.59868	2.91e-05	0.00232758	MSTRG.27521.10	1437	microtubule associated protein MAP65/ASE1 family protein [Medicago truncatula]/gi	Medtr5g093860.1_microtubule_associated_protein,_MAP65/ASE1_family_protein_HC_chr5:40981176-40985866_20140818
150.164	1.59862	2.91e-05	0.00232752	MSTRG.77109.1	1313	acid phosphatase/vanadium-dependent haloperoxidase [Medicago truncatula]/gi	Medtr3g085670.1_acid_phosphatase/vanadium-dependent_haloperoxidase_HC_chr3:38761891-38758587_20140818
32.72	1.59785	0.00164369	0.0408477	56553_t	861	phosphoinositide 3-kinase regulatory subunit-like protein [Medicago truncatula]/gi	Medtr6g088835.2_phosphoinositide_3-kinase_regulatory_subunit-like_protein_HC_chr6:33994054-33989430_20140818
943.927	1.59781	7.16e-06	0.000784895	MSTRG.86655.14	3228	TRAF superfamily protein putative [Medicago truncatula]/gi	Medtr8g089030.1_TRAF_superfamily_protein,_putative_LC_chr8:37006804-36991603_20140818
165.999	1.59781	0.000124748	0.0067716	MSTRG.1879.6	1566	sugar porter (SP) family MFS transporter [Medicago truncatula]/gi	Medtr4g118610.2_sugar_porter_(SP)_family_MFS_transporter_HC_chr4:49131241-49135079_20140818
98.2558	1.59638	0.000224023	0.0103138	MSTRG.73146.5	853	glutamyl-tRNA synthetase [Medicago truncatula]/gi	Medtr8g009900.1_glutamyl-tRNA_synthetase_HC_chr8:2456519-2462483_20140818
61.9414	1.59574	0.00180514	0.0434784	MSTRG.72582.1	264	---NA---	---NA---
69.3724	1.59517	1.12e-05	0.00111033	MSTRG.6320.3	1533	hypothetical protein L195_g007482 [Trifolium pratense]	---NA---
92.0087	1.59446	3.34e-05	0.00257635	MSTRG.79054.2	1782	Pmr5/Cas1p GDSL/SGNH-like acyl-esterase family protein [Medicago truncatula]/gi	Medtr3g070900.1_Pmr5/Cas1p_GDSL/SGNH-like_acyl-esterase_family_protein_HC_chr3:31820635-31823812_20140818
229.471	1.59272	0.000126488	0.0068397	MSTRG.62629.2	844	DnaJ-class molecular chaperone [Medicago truncatula]/gi	Medtr2g087660.1_DnaJ-class_molecular_chaperone_HC_chr2:36877846-36880571_20140818
3978.99	1.59256	9.64e-05	0.00555805	54057_t	1098	hypothetical protein MTR_3g067965 [Medicago truncatula]/gi	Medtr3g067965.1_hypothetical_protein_LC_chr3:30598335-30599266_20140818
136.679	1.5921	3.19e-07	6.61e-05	157068_t	5667	hypothetical protein TSUD_89960 [Trifolium subterraneum]	Medtr3g085530.1_PIF1-like_helicase_LC_chr3:38658911-38655923_20140818
95.1338	1.59169	2.81e-05	0.00225952	MSTRG.58629.3	1208	TPX2 (targeting protein for Xklp2) family protein [Medicago truncatula]/gi	Medtr1g075310.1_TPX2_(targeting_protein_for_Xklp2)_family_protein_HC_chr1:33342141-33338595_20140818
57.7616	1.59159	3.86e-05	0.00286024	113753_t	4911	LRR receptor-like kinase [Medicago truncatula]/gi	Medtr4g095042.1_LRR_receptor-like_kinase_HC_chr4:39576717-39574162_20140818
60.0103	1.59116	0.00013495	0.00716227	MSTRG.44802.7	409	TPX2 (targeting protein for Xklp2) family protein [Medicago truncatula]/gi	Medtr1g075310.1_TPX2_(targeting_protein_for_Xklp2)_family_protein_HC_chr1:33342141-33338595_20140818
103.028	1.59115	6.03e-07	0.00011142	MSTRG.46388.5	2612	NB-ARC domain disease resistance protein [Medicago truncatula]/gi	Medtr8g011550.1_NB-ARC_domain_disease_resistance_protein_LC_chr8:3142903-3139894_20140818
39.8378	1.59083	6.43e-05	0.00414362	183946_t	1119	cytochrome P450 family 71 protein [Medicago truncatula]/gi	Medtr5g094520.2_cytochrome_P450_family_71_protein_HC_chr5:41314159-41317550_20140818
155.069	1.59045	2.05e-07	4.72e-05	MSTRG.86196.1	1851	global transcription factor [Medicago truncatula]/gi	Medtr7g088700.1_global_transcription_factor_HC_chr7:34591539-34580098_20140818
75.7506	1.59022	0.000150023	0.00768582	MSTRG.83460.2	2816	Retrovirus-related Pol polyprotein from transposon TNT 1-94 [Cajanus cajan]	Medtr3g079700.1_double-stranded_RNA-binding_motif_protein_LC_chr3:35967574-35973361_20140818
188.136	1.58994	4.82e-05	0.00334723	MSTRG.48135.1	3648	protein FAR1-related sequence 5-like [Trifolium pratense]	Medtr7g446480.1_hypothetical_protein_LC_chr7:15845592-15844432_20140818
170.268	1.58952	7.73e-07	0.000136137	MSTRG.22719.3	760	defender against apoptotic death-like protein [Medicago truncatula]/gi	Medtr3g023120.1_defender_against_apoptotic_death-like_protein_HC_chr3:6985226-6981467_20140818
183.852	1.58831	0.00016727	0.00834046	52519_t	462	hypothetical protein TSUD_49530 [Trifolium subterraneum]	Medtr4g006830.1_ribosomal_protein_L7Ae/L30e/S12e/Gadd45_family_protein_HC_chr4:824939-827878_20140818
770.042	1.58607	0.000434842	0.0165054	MSTRG.86655.2	4059	TRAF superfamily protein putative [Medicago truncatula]/gi	Medtr8g089030.1_TRAF_superfamily_protein,_putative_LC_chr8:37006804-36991603_20140818
648.063	1.58586	6.65e-06	0.000745935	MSTRG.58896.44	587	hypothetical protein PHAVU_009G211300g partial [Phaseolus vulgaris]/gi	---NA---
123.974	1.58433	0.000372612	0.0148893	46471_t	2145	zinc finger BED domain-containing protein RICESLEEPER 2-like [Arachis ipaensis]	Medtr4g055480.1_hypothetical_protein_LC_chr4:20214968-20214399_20140818
431.406	1.58416	4.34e-05	0.00311716	1546_t	498	PB1 domain protein [Medicago truncatula]/gi	Medtr5g032960.1_PB1_domain_protein_HC_chr5:14201643-14199883_20140818
88.7797	1.58242	0.000104322	0.00590139	21510_t	4044	Retrovirus-related Pol polyprotein from transposon TNT 1-94 [Cajanus cajan]	Medtr8g011410.1_cysteine-rich_RLK_(receptor-like_kinase)_protein_HC_chr8:3054719-3058128_20140818
41.7916	1.5823	0.00119491	0.0328805	127956_t	2265	receptor-like kinase [Medicago truncatula]/gi	Medtr1g026940.1_receptor-like_kinase_HC_chr1:8863132-8861130_20140818
104.938	1.58177	1.7e-06	0.000257435	MSTRG.76591.5	1077	---NA---	Medtr3g037620.1_hypothetical_protein_LC_chr3:13819797-13819167_20140818
61.2403	1.58159	0.000287723	0.0123407	MSTRG.34141.2	1286	hypothetical protein TSUD_232130 [Trifolium subterraneum]	Medtr4g036080.1_disease_resistance_protein_(TIR-NBS-LRR_class),_putative_LC_chr4:12893851-12898919_20140818
1401.54	1.58036	8.34e-05	0.0050091	MSTRG.86655.1	4226	TRAF superfamily protein putative [Medicago truncatula]/gi	Medtr8g089030.1_TRAF_superfamily_protein,_putative_LC_chr8:37006804-36991603_20140818
135.891	1.57985	0.000701445	0.0230134	MSTRG.81748.1	647	hypothetical protein PHAVU_001G129800g [Phaseolus vulgaris]/gi	Medtr8g090105.1_tRNA-splicing_endonuclease_subunit_sen54_amino-terminal_protein_HC_chr8:37741275-37738113_20140818
62.6681	1.57685	5.84e-05	0.00385033	94876_t	3384	NBS-LRR type disease resistance protein [Medicago truncatula]/gi	Medtr3g021380.1_NBS-LRR_type_disease_resistance_protein_LC_chr3:6260285-6256594_20140818
123.228	1.57592	0.000878398	0.0266464	MSTRG.5735.3	995	glutamyl-tRNA synthetase [Medicago truncatula]/gi	Medtr8g009900.1_glutamyl-tRNA_synthetase_HC_chr8:2456519-2462483_20140818
39.6494	1.57583	0.00107388	0.0305093	MSTRG.85249.1	539	hypothetical protein MTR_6g016890 [Medicago truncatula]/gi	Medtr6g016890.1_hypothetical_protein_HC_chr6:6576140-6576405_20140818
74.935	1.57571	0.00106552	0.0303818	29957_t	1062	hypothetical protein MTR_1g492690 [Medicago truncatula]/gi	Medtr1g492690.1_hypothetical_protein_HC_chr1:41541171-41539306_20140818
668.717	1.5754	7.12e-06	0.000782824	MSTRG.58896.58	524	hypothetical protein PHAVU_009G211300g partial [Phaseolus vulgaris]/gi	---NA---
73.3474	1.57518	0.000709593	0.0231532	MSTRG.53848.1	215	---NA---	---NA---
104.564	1.57511	2.15e-06	0.000308047	MSTRG.15016.3	591	unknown [Medicago truncatula]	Medtr8g062440.1_cinnamyl_alcohol_dehydrogenase_HC_chr8:26099624-26105442_20140818
623.731	1.57362	8.49e-06	0.00090067	MSTRG.58896.9	652	hypothetical protein PHAVU_009G211300g partial [Phaseolus vulgaris]/gi	---NA---
184.192	1.57111	7.2e-12	7.2e-09	41466_t	3051	amino-terminal domain micro-spherule protein [Medicago truncatula]/gi	Medtr8g076470.2_amino-terminal_domain_micro-spherule_protein_HC_chr8:32390577-32386485_20140818
231.694	1.57064	5.46e-06	0.000643578	MSTRG.86196.2	2062	global transcription factor [Medicago truncatula]/gi	Medtr7g088700.1_global_transcription_factor_HC_chr7:34591539-34580098_20140818
209.25	1.56963	0.000461198	0.0171713	MSTRG.68405.24	2350	TRAF superfamily protein putative [Medicago truncatula]/gi	Medtr8g089030.2_TRAF_superfamily_protein,_putative_LC_chr8:37006804-36995677_20140818
41.1491	1.56961	0.0014329	0.0371299	MSTRG.45119.2	919	---NA---	---NA---
92.8747	1.56879	3.03e-05	0.00239471	MSTRG.11956.1	236	---NA---	---NA---
137.134	1.56793	1.79e-05	0.00160744	MSTRG.45046.3	1366	unknown [Medicago truncatula]/gi	Medtr3g111440.2_TRAF-type_zinc_finger_protein_HC_chr3:52079851-52077503_20140818
91.9685	1.56791	0.00126882	0.0341739	105913_t	1305	transmembrane amino acid transporter family protein [Medicago truncatula]/gi	Medtr4g055610.1_transmembrane_amino_acid_transporter_family_protein_HC_chr4:20285002-20289374_20140818
56.4643	1.5676	2.1e-05	0.00180982	151212_t	1671	LysM receptor kinase K1B [Medicago truncatula]/gi	Medtr5g086090.1_LysM_receptor_kinase_K1B_HC_chr5:37221079-37224624_20140818
61.4614	1.56451	0.00016879	0.00839161	MSTRG.71389.1	336	---NA---	Medtr5g094775.1_transmembrane_protein,_putative_HC_chr5:41422509-41425540_20140818
503.87	1.56363	6.65e-08	1.89e-05	MSTRG.14402.7	4406	anaphase-promoting complex subunit 1 [Medicago truncatula]/gi	Medtr5g082890.1_anaphase-promoting_complex_subunit_1_HC_chr5:35723483-35692350_20140818
109.62	1.56337	6.05e-06	0.000692452	MSTRG.39415.5	2211	cysteine-rich receptor-like kinase [Medicago truncatula]/gi	Medtr8g041880.1_cysteine-rich_receptor-like_kinase_HC_chr8:15802331-15798924_20140818
59.9364	1.56252	0.000546636	0.0192752	191446_t	789	stem 28 kDa glycoprotein [Medicago truncatula]/gi	Medtr8g014650.1_stem_28_kDa_glycoprotein_HC_chr8:4651673-4649758_20140818
48.3482	1.55879	0.00128656	0.0345016	182636_t	363	ATP-dependent Clp protease adaptor protein ClpS [Medicago truncatula]/gi	Medtr5g054770.1_ATP-dependent_Clp_protease_adaptor_protein_ClpS_HC_chr5:22566023-22570033_20140818
928.689	1.55857	7.65e-07	0.00013503	MSTRG.43622.1	319	---NA---	Medtr4g059020.1_hypothetical_protein_LC_chr4:21781510-21780682_20140818
71.65	1.55722	0.00139639	0.0364686	MSTRG.57615.3	460	hypothetical protein TSUD_353750 [Trifolium subterraneum]	Medtr8g009900.1_glutamyl-tRNA_synthetase_HC_chr8:2456519-2462483_20140818
54.9334	1.55654	0.000845854	0.0260238	MSTRG.31813.11	1631	disease resistance protein (TIR-NBS-LRR class) putative [Medicago truncatula]/gi	Medtr4g014300.1_disease_resistance_protein_(TIR-NBS-LRR_class),_putative_LC_chr4:4005325-3998585_20140818
79.7737	1.55637	0.00103933	0.029884	MSTRG.57607.2	1168	adipocyte plasma membrane-associated-like protein [Medicago truncatula]/gi	Medtr2g042420.1_adipocyte_plasma_membrane-associated-like_protein_HC_chr2:18506325-18510367_20140818
78.0317	1.55459	0.00065836	0.0220386	MSTRG.49323.2	1191	acid phosphatase-like protein [Medicago truncatula]/gi	Medtr5g081740.4_acid_phosphatase-like_protein_HC_chr5:35029850-35028304_20140818
135.416	1.55292	0.000795081	0.0249225	MSTRG.4625.3	1340	PREDICTED: tRNA-splicing endonuclease subunit Sen54-like isoform X1 [Cicer arietinum]/gi	Medtr8g090105.1_tRNA-splicing_endonuclease_subunit_sen54_amino-terminal_protein_HC_chr8:37741275-37738113_20140818
456.924	1.5526	4.26e-06	0.000525932	MSTRG.80441.2	591	---NA---	Medtr3g014608.1_transmembrane_protein,_putative_LC_chr3:4176894-4177520_20140818
223.463	1.55258	0.000328618	0.0135942	MSTRG.60233.7	2103	hypothetical protein MTR_6g007360 [Medicago truncatula]/gi	Medtr6g007360.1_hypothetical_protein_HC_chr6:1576905-1572672_20140818
45.2722	1.54954	0.000809219	0.0251941	MSTRG.10759.6	888	hypothetical protein MTR_3g080743 [Medicago truncatula]/gi	Medtr3g080743.1_hypothetical_protein_HC_chr3:36547098-36545266_20140818
65.0893	1.54781	0.00157151	0.0395102	MSTRG.13424.4	609	unknown [Medicago truncatula]	Medtr6g003920.1_mRNA_cap_guanine-N7_methyltransferase_HC_chr6:19042-24548_20140818
145.717	1.54598	6.09e-06	0.000696133	MSTRG.14526.1	2055	nonsense-mediated mRNA decay NMD3 family protein [Medicago truncatula]/gi	Medtr4g107030.1_nonsense-mediated_mRNA_decay_NMD3_family_protein_HC_chr4:43995360-43996798_20140818
149.382	1.54256	0.000859227	0.0262965	MSTRG.4625.2	1335	PREDICTED: tRNA-splicing endonuclease subunit Sen54-like isoform X1 [Cicer arietinum]/gi	Medtr8g090105.1_tRNA-splicing_endonuclease_subunit_sen54_amino-terminal_protein_HC_chr8:37741275-37738113_20140818
72.0788	1.54236	0.00220446	0.0495314	MSTRG.68321.1	301	---NA---	---NA---
54.3269	1.54178	0.000409592	0.0158915	MSTRG.17938.2	468	WRKY family transcription factor [Medicago truncatula]/gi	Medtr1g015140.1_WRKY_family_transcription_factor_HC_chr1:3734958-3734089_20140818
1898.77	1.54065	0.000125516	0.00680853	MSTRG.86655.6	4214	TRAF superfamily protein putative [Medicago truncatula]/gi	Medtr8g089030.1_TRAF_superfamily_protein,_putative_LC_chr8:37006804-36991603_20140818
143.961	1.53889	9.33e-05	0.00542091	187675_t	3051	protein FAR1-related sequence 5-like [Trifolium pratense]	Medtr7g446480.1_hypothetical_protein_LC_chr7:15845592-15844432_20140818
188.923	1.53856	2.73e-06	0.000375288	MSTRG.22719.1	919	defender against apoptotic death-like protein [Medicago truncatula]/gi	Medtr3g023120.1_defender_against_apoptotic_death-like_protein_HC_chr3:6985226-6981467_20140818
1942.92	1.53785	0.000137895	0.00725891	MSTRG.86655.5	4204	TRAF superfamily protein putative [Medicago truncatula]/gi	Medtr8g089030.1_TRAF_superfamily_protein,_putative_LC_chr8:37006804-36991603_20140818
130.598	1.53659	1.18e-05	0.00115749	MSTRG.73872.1	344	cytochrome P450 family 71 protein [Medicago truncatula]/gi	Medtr4g048580.1_cytochrome_P450_family_71_protein_HC_chr4:17250064-17248200_20140818
1019.06	1.53375	2.77e-06	0.000379486	MSTRG.86655.12	4184	TRAF superfamily protein putative [Medicago truncatula]/gi	Medtr8g089030.1_TRAF_superfamily_protein,_putative_LC_chr8:37006804-36991603_20140818
341.903	1.53312	0.00024443	0.0109698	MSTRG.23767.1	2004	F-box/LRR protein putative [Medicago truncatula]/gi	Medtr6g016725.1_F-box/LRR_protein,_putative_LC_chr6:6417673-6415859_20140818
78.8748	1.53293	1.81e-05	0.00161771	MSTRG.42933.2	1680	receptor-like kinase [Medicago truncatula]/gi	Medtr1g031580.1_receptor-like_kinase_HC_chr1:11039443-11041808_20140818
47.2271	1.53167	0.00103812	0.0298557	MSTRG.758.6	1299	ethylene-responsive kinase Le-CTR1 [Medicago truncatula]/gi	Medtr5g066490.1_ethylene-responsive_kinase_Le-CTR1_HC_chr5:28054876-28046840_20140818
350.461	1.53162	8.68e-06	0.00091549	MSTRG.27521.6	2423	PREDICTED: LOW QUALITY PROTEIN: 65-kDa microtubule-associated protein 1-like [Vitis vinifera]	Medtr5g093860.1_microtubule_associated_protein,_MAP65/ASE1_family_protein_HC_chr5:40981176-40985866_20140818
89.8903	1.53025	0.000135909	0.00719102	MSTRG.29560.3	1341	microtubule associated protein MAP65/ASE1 family protein [Medicago truncatula]/gi	Medtr5g093860.1_microtubule_associated_protein,_MAP65/ASE1_family_protein_HC_chr5:40981176-40985866_20140818
51.8043	1.52989	0.00137546	0.0361045	MSTRG.40335.1	743	YABBY-like transcription factor CRABS CLAW-like protein [Medicago truncatula]/gi	Medtr5g046230.1_YABBY-like_transcription_factor_CRABS_CLAW-like_protein_HC_chr5:20267886-20271029_20140818
51.4531	1.52915	0.000251565	0.0111735	183500_t	585	esterase/lipase/thioesterase family protein [Medicago truncatula]/gi	Medtr2g039480.1_esterase/lipase/thioesterase_family_protein_HC_chr2:17302990-17297098_20140818
42.2338	1.52759	0.00212184	0.0482702	110198_t	2058	Integrase catalytic region; Zinc finger CCHC-type; Peptidase aspartic catalytic [Medicago truncatula]	Medtr8g085590.1_DUF538_family_protein_HC_chr8:35457713-35458482_20140818
100.543	1.52727	0.00128797	0.0345195	70105_t	3048	NBS-LRR type disease resistance protein [Medicago truncatula]/gi	Medtr4g022480.1_NBS-LRR_type_disease_resistance_protein_LC_chr4:7493652-7497470_20140818
70.1288	1.52664	4.07e-05	0.00296689	56294_t	2631	receptor-like kinase [Medicago truncatula]/gi	Medtr1g031540.1_receptor-like_kinase_LC_chr1:11024243-11031028_20140818
1735.77	1.52652	3.53e-06	0.000455718	MSTRG.43380.10	1121	extensin-like region protein [Medicago truncatula]/gi	Medtr4g065113.1_extensin-like_region_protein_LC_chr4:24482862-24481165_20140818
1185.82	1.52496	4.21e-06	0.000521727	MSTRG.43380.11	1273	extensin-like region protein [Medicago truncatula]/gi	Medtr4g065113.1_extensin-like_region_protein_LC_chr4:24482862-24481165_20140818
52.5543	1.52328	0.00133707	0.0354023	MSTRG.34759.1	483	transmembrane protein putative [Medicago truncatula]/gi	Medtr8g465130.1_transmembrane_protein,_putative_LC_chr8:23167789-23169635_20140818
57.5203	1.52078	2.06e-05	0.00177972	MSTRG.82634.1	1512	50S ribosomal protein L3P [Medicago truncatula]/gi	Medtr6g006970.1_50S_ribosomal_protein_L3P_HC_chr6:1316494-1310518_20140818
122.071	1.52027	0.000363938	0.0146447	MSTRG.5735.5	959	glutamyl-tRNA synthetase [Medicago truncatula]/gi	Medtr8g009900.1_glutamyl-tRNA_synthetase_HC_chr8:2456519-2462483_20140818
136.879	1.51951	2.35e-05	0.00196918	MSTRG.45046.2	1384	unknown [Medicago truncatula]/gi	Medtr3g111440.2_TRAF-type_zinc_finger_protein_HC_chr3:52079851-52077503_20140818
92.634	1.51886	0.000971366	0.0285769	MSTRG.462.1	296	---NA---	---NA---
235.176	1.51786	3e-07	6.35e-05	MSTRG.47667.4	1068	unknown [Medicago truncatula]/gi	Medtr3g082420.2_hypothetical_protein_HC_chr3:37203737-37205754_20140818
75.0901	1.51773	0.000528234	0.0188056	MSTRG.9889.10	489	hypothetical protein GLYMA_09G093000 [Glycine max]	---NA---
282.081	1.51554	7.67e-10	4.12e-07	MSTRG.56676.2	2429	S-locus lectin kinase family protein [Medicago truncatula]/gi	Medtr0090s0020.1_S-locus_lectin_kinase_family_protein_HC_scaffold0090:10869-7455_20140818
87.0093	1.51478	0.000220156	0.0101934	MSTRG.9889.15	489	hypothetical protein GLYMA_09G093000 [Glycine max]	---NA---
49.629	1.5144	0.000537469	0.0190409	MSTRG.88999.2	1867	receptor-like kinase [Medicago truncatula]/gi	Medtr1g026940.1_receptor-like_kinase_HC_chr1:8863132-8861130_20140818
45.1728	1.51279	0.000853215	0.0261622	188602_t	960	FAD/NAD(P)-binding oxidoreductase family protein [Medicago truncatula]/gi	Medtr1g011700.1_FAD/NAD(P)-binding_oxidoreductase_family_protein_HC_chr1:2184151-2186458_20140818
69.6626	1.51088	0.00103374	0.0297675	MSTRG.21346.4	1550	FAD/NAD(P)-binding oxidoreductase family protein [Medicago truncatula]/gi	Medtr1g112780.1_FAD/NAD(P)-binding_oxidoreductase_family_protein_LC_chr1:51070266-51062985_20140818
61.5203	1.51064	0.00109057	0.030831	MSTRG.23933.2	1138	hypothetical protein MTR_0275s0040 partial [Medicago truncatula]/gi	Medtr0275s0040.1_hypothetical_protein_HC_scaffold0275:21984-21107_20140818
62.1865	1.50351	0.000355354	0.0144002	27808_t	1257	hypothetical protein MTR_3g086220 [Medicago truncatula]/gi	Medtr3g086220.1_hypothetical_protein_HC_chr3:39010613-39016559_20140818
127.293	1.50246	1.15e-05	0.00113621	MSTRG.46388.3	3501	NB-ARC domain disease resistance protein [Medicago truncatula]/gi	Medtr8g011550.1_NB-ARC_domain_disease_resistance_protein_LC_chr8:3142903-3139894_20140818
78.2635	1.50171	0.000431482	0.0164201	MSTRG.89433.10	1466	F-box/RNI/FBD-like domain protein [Medicago truncatula]/gi	Medtr2g047848.1_F-box/RNI/FBD-like_domain_protein_LC_chr2:20923213-20924731_20140818
236.215	1.50051	0.000133156	0.00709139	MSTRG.86600.3	495	S-locus lectin kinase family protein [Medicago truncatula]/gi	Medtr7g056620.1_S-locus_lectin_kinase_family_protein_HC_chr7:20231729-20232384_20140818
342.874	1.49967	0.000208726	0.00979588	MSTRG.43380.4	1096	---NA---	---NA---
140.33	1.49901	1e-05	0.00102392	MSTRG.83440.4	980	transmembrane protein [Medicago truncatula]/gi	Medtr7g066800.1_transmembrane_protein_HC_chr7:24362572-24365623_20140818
59.4696	1.49749	0.00114652	0.0319716	MSTRG.22721.5	777	---NA---	---NA---
127.149	1.49648	0.00209723	0.0479196	MSTRG.84244.2	1514	PREDICTED: ent-kaur-16-ene synthase chloroplastic [Cicer arietinum]	Medtr3g058160.1_Ent-kaurene_synthase_HC_chr3:23003263-22998429_20140818
215.547	1.49433	0.000495534	0.0180042	MSTRG.68405.15	787	TRAF superfamily protein putative [Medicago truncatula]/gi	Medtr8g089030.2_TRAF_superfamily_protein,_putative_LC_chr8:37006804-36995677_20140818
7302.35	1.49395	0.00182699	0.0438002	MSTRG.43379.1	1704	hypothetical protein L195_g044676 partial [Trifolium pratense]	Medtr4g065113.1_extensin-like_region_protein_LC_chr4:24482862-24481165_20140818
803.792	1.49383	6.81e-06	0.000758132	MSTRG.86655.10	2933	TRAF superfamily protein putative [Medicago truncatula]/gi	Medtr8g089030.1_TRAF_superfamily_protein,_putative_LC_chr8:37006804-36991603_20140818
924.774	1.49372	0.000560137	0.0196112	MSTRG.43380.5	1145	---NA---	---NA---
57.6889	1.49109	0.00202914	0.0468512	MSTRG.75555.4	258	---NA---	---NA---
180.331	1.49105	2.38e-08	7.98e-06	MSTRG.83961.6	1954	UDP-glucosyltransferase family protein [Medicago truncatula]/gi	Medtr5g072820.1_UDP-glucosyltransferase_family_protein_HC_chr5:30989979-30993244_20140818
337.195	1.49064	2.01e-07	4.63e-05	172102_t	5229	anaphase-promoting complex subunit 1 [Medicago truncatula]/gi	Medtr5g082890.1_anaphase-promoting_complex_subunit_1_HC_chr5:35723483-35692350_20140818
90.7957	1.4902	0.000681274	0.0225522	MSTRG.924.1	1485	nucleobase-ascorbate transporter-like protein [Medicago truncatula]/gi	Medtr3g103230.1_nucleobase-ascorbate_transporter-like_protein_HC_chr3:47578892-47582051_20140818
75.9615	1.48877	8.08e-05	0.00488496	193051_t	1866	hypothetical protein TSUD_239610 [Trifolium subterraneum]	Medtr7g046380.1_Ulp1_protease_family,_carboxy-terminal_domain_protein_HC_chr7:16432801-16434835_20140818
74.0804	1.48859	0.00139449	0.0364435	MSTRG.12781.2	754	---NA---	---NA---
94.8175	1.48743	6.8e-06	0.000757944	MSTRG.84208.1	2300	hypothetical protein TSUD_239610 [Trifolium subterraneum]	Medtr7g046380.1_Ulp1_protease_family,_carboxy-terminal_domain_protein_HC_chr7:16432801-16434835_20140818
77.9279	1.48728	2.28e-05	0.00193126	MSTRG.89517.2	205	aspartic protease family protein putative [Medicago truncatula]/gi	Medtr5g080330.1_aspartic_protease_family_protein,_putative_LC_chr5:34380900-34377963_20140818
94.0644	1.48708	5.98e-05	0.00392357	MSTRG.84208.3	1677	Ulp1 protease family carboxy-terminal domain protein [Medicago truncatula]/gi	Medtr7g046380.1_Ulp1_protease_family,_carboxy-terminal_domain_protein_HC_chr7:16432801-16434835_20140818
161.588	1.48691	8.47e-07	0.000147342	MSTRG.59343.6	2146	polyadenylate-binding protein RBP47C [Medicago truncatula]/gi	Medtr3g101370.2_polyadenylate-binding_protein_RBP47C_HC_chr3:46662442-46658399_20140818
173.836	1.48647	0.000150785	0.00771717	64323_t	2433	RING/U-box protein putative [Medicago truncatula]/gi	Medtr2g084475.1_RING/U-box_protein,_putative_HC_chr2:35641571-35646787_20140818
492.911	1.48552	5.53e-05	0.0037046	12467_t	3216	TRAF superfamily protein putative [Medicago truncatula]/gi	Medtr8g089030.2_TRAF_superfamily_protein,_putative_LC_chr8:37006804-36995677_20140818
85.2588	1.48219	0.000185428	0.00898277	MSTRG.66342.2	842	---NA---	---NA---
35.7298	1.48083	0.000412118	0.0159576	MSTRG.17579.42	1223	hypothetical protein CISIN_1g040116mg [Citrus sinensis]	Medtr4g129790.1_F0F1_ATP_synthase_subunit_gamma_HC_chr4:54097375-54102498_20140818
314.366	1.47988	6.8e-09	2.66e-06	MSTRG.56676.1	2743	S-locus lectin kinase family protein [Medicago truncatula]/gi	Medtr0090s0020.1_S-locus_lectin_kinase_family_protein_HC_scaffold0090:10869-7455_20140818
547.23	1.47855	6.61e-08	1.88e-05	MSTRG.14402.1	6012	anaphase-promoting complex subunit 1 [Medicago truncatula]/gi	Medtr5g082890.1_anaphase-promoting_complex_subunit_1_HC_chr5:35723483-35692350_20140818
281.235	1.47749	1.78e-07	4.27e-05	MSTRG.9276.3	1103	esterase/lipase/thioesterase family protein [Medicago truncatula]/gi	Medtr2g039480.1_esterase/lipase/thioesterase_family_protein_HC_chr2:17302990-17297098_20140818
55.8668	1.47696	0.00204817	0.047155	100939_t	1356	receptor-like kinase [Medicago truncatula]/gi	Medtr1g027040.1_receptor-like_kinase_LC_chr1:8925788-8927830_20140818
164.373	1.47485	0.000130748	0.00699615	MSTRG.24993.3	2530	TMV resistance protein N isoform X2 [Arachis duranensis]	Medtr4g023260.1_disease_resistance_protein_(TIR-NBS-LRR_class),_putative_LC_chr4:7840233-7834686_20140818
95.0479	1.47448	0.000282877	0.0121936	48383_t	1248	hypothetical protein TSUD_253520 [Trifolium subterraneum]	Medtr7g086210.1_hypothetical_protein_LC_chr7:33433930-33432245_20140818
132.942	1.47435	0.000383013	0.0151525	77830_t	6846	disease resistance protein (TIR-NBS-LRR class) [Medicago truncatula]/gi	Medtr6g079090.1_disease_resistance_protein_(TIR-NBS-LRR_class)_LC_chr6:29761538-29752605_20140818
225.046	1.47304	2.89e-07	6.19e-05	MSTRG.63173.8	3905	PREDICTED: uncharacterized protein LOC101504500 isoform X1 [Cicer arietinum]/gi	Medtr3g466620.1_NB-ARC_domain_disease_resistance_protein_LC_chr3:27403732-27400482_20140818
99.1467	1.47133	4.26e-05	0.00307274	MSTRG.17377.31	2682	S-locus lectin kinase family protein [Medicago truncatula]/gi	Medtr3g007630.1_S-locus_lectin_kinase_family_protein_LC_chr3:1086871-1094084_20140818
428.144	1.47082	0.000137759	0.0072542	MSTRG.51536.3	273	---NA---	---NA---
408.655	1.46969	3.08e-07	6.5e-05	MSTRG.35438.4	1869	unknown [Medicago truncatula]/gi	Medtr1g114640.1_GRAM_domain_protein/ABA-responsive-like_protein_HC_chr1:51754431-51753109_20140818
50.7662	1.46951	0.00106956	0.0304424	MSTRG.64371.11	681	unknown [Medicago truncatula]	Medtr5g038430.1_F-box/FBD-like_domain_protein_HC_chr5:16855539-16866753_20140818
210.183	1.46914	0.000494907	0.0179981	MSTRG.68405.16	791	hypothetical protein L195_g054481 partial [Trifolium pratense]	Medtr8g089030.2_TRAF_superfamily_protein,_putative_LC_chr8:37006804-36995677_20140818
64.9932	1.46898	0.000125967	0.0068163	153633_t	2115	Protein of unknown function DUF248 methyltransferase putative [Medicago truncatula]/gi	Medtr7g076150.1_methyltransferase_PMT16,_putative_HC_chr7:28629556-28623898_20140818
861.432	1.46855	3.7e-05	0.00277705	MSTRG.43380.19	965	---NA---	---NA---
216.503	1.46743	0.000684412	0.0226078	MSTRG.68405.46	787	TRAF superfamily protein putative [Medicago truncatula]/gi	Medtr8g089030.2_TRAF_superfamily_protein,_putative_LC_chr8:37006804-36995677_20140818
167.397	1.46576	0.000348961	0.0142118	MSTRG.67662.3	1461	transmembrane amino acid transporter family protein [Medicago truncatula]/gi	Medtr4g055610.1_transmembrane_amino_acid_transporter_family_protein_HC_chr4:20285002-20289374_20140818
150.887	1.46439	7.66e-05	0.00470387	MSTRG.83941.8	1937	ubiquitin-activating enzyme E1 1 [Medicago truncatula]/gi	Medtr5g072480.1_ubiquitin-activating_enzyme_E1_1_HC_chr5:30842736-30830993_20140818
58.915	1.4634	0.0016695	0.0412508	47709_t	744	SAM (and some other nucleotide) binding motif [Medicago truncatula]/gi	Medtr7g090180.1_S-adenosylmethionine-dependent_methyltransferase_HC_chr7:35398677-35400589_20140818
101.664	1.46308	0.00221412	0.0496621	MSTRG.31778.2	3287	NBS-LRR type disease resistance protein [Medicago truncatula]/gi	Medtr4g022480.1_NBS-LRR_type_disease_resistance_protein_LC_chr4:7493652-7497470_20140818
90.5916	1.46078	2.74e-05	0.00222836	62961_t	312	hypothetical protein SETIT_032292mg partial [Setaria italica]	Medtr8g038460.1_histone_H4_domain_protein_HC_chr8:14261400-14260862_20140818
67.0167	1.46018	0.000438873	0.0165872	MSTRG.69081.1	3747	PREDICTED: uncharacterized protein LOC101512466 [Cicer arietinum]	Medtr5g061300.1_hypothetical_protein_LC_chr5:25477205-25475100_20140818
115.111	1.45989	3.54e-05	0.00268239	MSTRG.82216.4	856	F-box protein PP2-A13 [Medicago truncatula]/gi	Medtr0002s0020.1_F-box_protein_PP2-A13_HC_scaffold0002:6674-10318_20140818
35.2965	1.45931	0.000974015	0.0286191	MSTRG.17579.17	2081	calcium-binding EF hand protein [Medicago truncatula]/gi	Medtr3g054210.1_calcium-binding_EF_hand_protein_HC_chr3:21497880-21502475_20140818
171.207	1.4593	1.28e-05	0.00123022	MSTRG.33418.3	2039	unknown [Medicago truncatula]	Medtr8g009970.1_splicing_factor_3A_subunit_2_HC_chr8:2491922-2495853_20140818
587.332	1.45817	4.35e-05	0.00312039	MSTRG.43380.14	1072	---NA---	Medtr4g065113.1_extensin-like_region_protein_LC_chr4:24482862-24481165_20140818
171.775	1.45766	0.000374338	0.0149352	162015_t	3222	disease resistance protein (TIR-NBS-LRR class) putative [Medicago truncatula]/gi	Medtr4g080777.1_disease_resistance_protein_(TIR-NBS-LRR_class),_putative_LC_chr4:31243045-31248009_20140818
93.3899	1.4568	7.58e-06	0.000821577	19474_t	741	ankyrin repeat plant-like protein partial [Medicago truncatula]/gi	Medtr0514s0010.1_ankyrin_repeat_plant-like_protein_LC_scaffold0514:963-215_20140818
52.8107	1.45666	0.000253481	0.0112424	MSTRG.56584.4	887	hypothetical protein TSUD_161120 [Trifolium subterraneum]	---NA---
423.636	1.45623	7.97e-07	0.000139749	MSTRG.63173.7	7189	NB-ARC domain disease resistance protein [Medicago truncatula]/gi	Medtr3g062090.1_NB-ARC_domain_disease_resistance_protein_LC_chr3:27987790-28006982_20140818
52.5116	1.45503	0.00190845	0.0450359	MSTRG.758.12	990	ethylene-responsive kinase Le-CTR1 [Medicago truncatula]/gi	Medtr5g066490.1_ethylene-responsive_kinase_Le-CTR1_HC_chr5:28054876-28046840_20140818
45.5033	1.45486	1.08e-05	0.00108592	MSTRG.20683.2	1116	plant/F3C3-6 protein [Medicago truncatula]/gi	Medtr5g028020.1_plant/F3C3-6_protein_HC_chr5:11708806-11712504_20140818
47.4998	1.45364	0.0011623	0.0322786	MSTRG.13164.3	1074	Histone H2B; Histone-fold [Medicago truncatula]	Medtr4g115160.1_nucleosome_assembly_protein_LC_chr4:47526912-47532730_20140818
246.167	1.45055	0.000171283	0.0084778	MSTRG.59343.17	1578	PREDICTED: NAD(P)H-dependent 6'-deoxychalcone synthase-like [Cicer arietinum]	Medtr3g083130.1_aldo/keto_reductase_family_oxidoreductase_HC_chr3:37505830-37503715_20140818
64.1633	1.45052	0.00110867	0.0312287	122872_t	1815	NYN domain protein [Medicago truncatula]/gi	Medtr4g098990.1_NYN_domain_protein_HC_chr4:40918811-40913608_20140818
92.4213	1.44987	1.02e-05	0.00103472	31335_t	864	F-box protein PP2-A13 [Medicago truncatula]/gi	Medtr0002s0020.1_F-box_protein_PP2-A13_HC_scaffold0002:6674-10318_20140818
54.8158	1.44981	0.0022317	0.0499118	MSTRG.71518.3	1916	structural maintenance of chromosomes protein [Medicago truncatula]/gi	Medtr1g051825.2_structural_maintenance_of_chromosomes_protein_HC_chr1:20727128-20747784_20140818
74.7039	1.44771	0.002141	0.0485776	MSTRG.18669.2	1361	arm repeat superfamily protein [Trifolium pratense]	Medtr2g098850.2_cyclin-like_protein_HC_chr2:42329066-42318796_20140818
348.437	1.44737	1.22e-06	0.000198319	MSTRG.35438.1	2451	unknown [Medicago truncatula]/gi	Medtr1g114640.1_GRAM_domain_protein/ABA-responsive-like_protein_HC_chr1:51754431-51753109_20140818
246.516	1.44723	1.51e-06	0.000236236	MSTRG.16647.4	5292	disease resistance protein RGA4 [Medicago truncatula]/gi	Medtr5g070960.1_disease_resistance_protein_RGA4_HC_chr5:30062044-30058913_20140818
172.641	1.44623	9.9e-05	0.0056795	MSTRG.58896.19	569	---NA---	---NA---
77.3014	1.44591	0.000378107	0.0150323	MSTRG.49120.1	2403	hypothetical protein MTR_8g095235 [Medicago truncatula]/gi	Medtr8g095235.1_hypothetical_protein_LC_chr8:39842968-39841953_20140818
69.8656	1.44396	6.55e-05	0.00419814	MSTRG.72118.18	1519	glycosyltransferase family 90 protein [Medicago truncatula]/gi	Medtr8g031470.1_glycosyltransferase_family_90_protein_HC_chr8:11807748-11811706_20140818
52.192	1.44076	6.97e-05	0.0043936	100170_t	2838	LRR receptor-like kinase family protein [Medicago truncatula]/gi	Medtr6g016140.1_LRR_receptor-like_kinase_family_protein_LC_chr6:5828391-5831303_20140818
69.5157	1.4402	0.00152626	0.0386992	MSTRG.89339.9	2170	PREDICTED: uncharacterized protein LOC109173559 [Ipomoea nil]	Medtr8g057120.1_hypothetical_protein_LC_chr8:18801883-18803131_20140818
241.456	1.43958	7.34e-05	0.00456585	MSTRG.21717.1	5398	disease resistance protein (TIR-NBS-LRR class) [Medicago truncatula]/gi	Medtr5g090940.1_disease_resistance_protein_(TIR-NBS-LRR_class)_HC_chr5:39619088-39625198_20140818
100.674	1.43885	0.000584851	0.0202443	MSTRG.69396.2	1885	50S ribosomal protein L21 related protein [Medicago truncatula]/gi	Medtr7g111750.1_50S_ribosomal_protein_L21,_related_protein_HC_chr7:45898944-45894633_20140818
313.328	1.43867	2.57e-06	0.000355868	MSTRG.58896.23	710	hypothetical protein KK1_048371 [Cajanus cajan]	---NA---
113.02	1.4375	0.000207199	0.00976266	MSTRG.59934.2	4339	LRR and NB-ARC domain disease resistance protein [Medicago truncatula]/gi	Medtr3g023030.1_LRR_and_NB-ARC_domain_disease_resistance_protein_LC_chr3:6950546-6944739_20140818
114.806	1.43726	4.45e-05	0.00317282	MSTRG.72118.19	1574	glycosyltransferase family 90 protein [Medicago truncatula]/gi	Medtr8g031470.1_glycosyltransferase_family_90_protein_HC_chr8:11807748-11811706_20140818
134.753	1.43611	0.000714042	0.0232543	MSTRG.84501.2	1327	hypothetical protein TSUD_253520 [Trifolium subterraneum]	Medtr7g086210.1_hypothetical_protein_LC_chr7:33433930-33432245_20140818
93.3717	1.43577	0.00201454	0.0466443	MSTRG.78935.6	1631	F-box protein [Medicago truncatula]/gi	Medtr6g018360.1_F-box_protein_LC_chr6:7027741-7024525_20140818
95.6276	1.43558	4.59e-05	0.00323552	MSTRG.82999.1	1574	BEST plant protein match is: (TAIR:plant.1) protein putative [Medicago truncatula]/gi	Medtr3g099600.1_BEST_plant_protein_match_is:_(TAIR:plant.1)_protein,_putative_HC_chr3:45661572-45658085_20140818
409.163	1.43402	1.74e-06	0.000262994	183284_t	1716	lactoylglutathione lyase/glyoxalase I family protein [Medicago truncatula]/gi	Medtr4g011020.1_lactoylglutathione_lyase/glyoxalase_I_family_protein_HC_chr4:2571660-2573651_20140818
118.747	1.43313	0.000793989	0.0249051	MSTRG.79113.3	2673	E3 ubiquitin protein ligase RIN2 [Medicago truncatula]/gi	Medtr3g007760.1_E3_ubiquitin_protein_ligase_RIN2_HC_chr3:1166460-1173444_20140818
113.625	1.43137	1.33e-05	0.00127146	MSTRG.3250.1	654	hypothetical protein TSUD_215660 [Trifolium subterraneum]	---NA---
62.4044	1.43097	0.000376728	0.0150035	MSTRG.31221.3	1240	sugar porter (SP) family MFS transporter [Medicago truncatula]/gi	Medtr4g118610.2_sugar_porter_(SP)_family_MFS_transporter_HC_chr4:49131241-49135079_20140818
41.8347	1.43063	0.00099682	0.0290117	MSTRG.20355.1	852	dihydroflavonol reductase [Medicago truncatula]/gi	Medtr2g101330.1_dihydroflavonol_reductase_HC_chr2:43558464-43557156_20140818
54.5237	1.42919	0.000275494	0.011972	MSTRG.34808.1	732	PREDICTED: zinc finger BED domain-containing protein DAYSLEEPER-like [Glycine max]	Medtr5g065670.1_transcription_factor_HC_chr5:27629590-27627190_20140818
82.8019	1.42914	1.03e-05	0.00104617	MSTRG.3143.1	3149	hypothetical protein MtrDRAFT_AC150207g16v2 [Medicago truncatula]	Medtr1g018830.1_hypothetical_protein_HC_chr1:5545314-5542120_20140818
64.1299	1.42884	6.83e-05	0.00433374	48852_t	2700	hypothetical protein MtrDRAFT_AC150207g16v2 [Medicago truncatula]	Medtr1g018830.1_hypothetical_protein_HC_chr1:5545314-5542120_20140818
172.171	1.42728	0.00125768	0.0339919	MSTRG.77557.3	1904	PREDICTED: uncharacterized protein LOC101492457 isoform X1 [Cicer arietinum]	Medtr3g011100.1_F-box_and_associated_interaction_domain_protein_HC_chr3:2698683-2696484_20140818
65.7559	1.42594	0.000836477	0.0258145	MSTRG.3095.10	1038	alpha 14-glycosyltransferase family protein [Medicago truncatula]/gi	Medtr4g084060.1_alpha_1,4-glycosyltransferase_family_protein_HC_chr4:32736243-32732684_20140818
109.829	1.4251	4.4e-05	0.00314681	MSTRG.4384.1	351	---NA---	---NA---
65.8953	1.42501	0.0011373	0.0317865	MSTRG.58005.2	313	hypothetical protein MTR_7g074470 [Medicago truncatula]/gi	Medtr7g074470.1_hypothetical_protein_LC_chr7:27833510-27832868_20140818
134.11	1.4244	0.00206002	0.0473004	MSTRG.84244.1	1556	PREDICTED: ent-kaur-16-ene synthase chloroplastic [Cicer arietinum]	Medtr3g058160.1_Ent-kaurene_synthase_HC_chr3:23003263-22998429_20140818
55.0691	1.42395	1.35e-05	0.00129113	MSTRG.1142.7	2335	zein-binding protein [Medicago truncatula]/gi	Medtr0168s0060.1_zein-binding_protein_HC_scaffold0168:18855-21061_20140818
152.698	1.42325	0.00034437	0.0140901	MSTRG.35600.4	878	transmembrane protein putative [Medicago truncatula]/gi	Medtr4g050830.1_transmembrane_protein,_putative_HC_chr4:18049440-18049784_20140818
60.9164	1.4226	0.000378977	0.0150543	MSTRG.32847.9	886	cysteine synthase-like protein partial [Trifolium pratense]	Medtr1g081620.1_O-acetylserine_(thiol)_lyase_HC_chr1:36280172-36284490_20140818
1790.23	1.42027	1.68e-13	2.62e-10	92703_t	1311	unknown [Medicago truncatula]	Medtr2g076590.1_epidermis-specific_secreted_EP1-like_glycoprotein_HC_chr2:32063871-32065553_20140818
1052.7	1.41893	2.02e-05	0.00175475	MSTRG.80441.1	1070	hypothetical protein MTR_2g020150 [Medicago truncatula]/gi	Medtr2g020150.1_hypothetical_protein_LC_chr2:6680303-6682594_20140818
320.668	1.41757	0.000191074	0.00918735	MSTRG.37596.34	1094	subtilisin-like serine protease [Medicago truncatula]/gi	Medtr7g081580.1_subtilisin-like_serine_protease_HC_chr7:31150515-31143203_20140818
122.985	1.41689	1.3e-05	0.00125199	73994_t	1533	glycosyltransferase family 90 protein [Medicago truncatula]/gi	Medtr8g031470.1_glycosyltransferase_family_90_protein_HC_chr8:11807748-11811706_20140818
84.5106	1.41686	0.000274691	0.0119505	MSTRG.36767.4	1042	---NA---	Medtr2g101190.1_class_III_homeodomain_leucine_zipper_protein_HC_chr2:43512049-43503468_20140818
440.956	1.41666	4.82e-09	1.98e-06	MSTRG.73880.4	2837	disease resistance protein (TIR-NBS-LRR class) [Medicago truncatula]/gi	Medtr1g007300.1_disease_resistance_protein_(TIR-NBS-LRR_class)_LC_chr1:268696-264988_20140818
96.162	1.41649	0.000164599	0.00822846	MSTRG.63259.2	1437	inactive purple acid phosphatase-like protein [Medicago truncatula]/gi	Medtr4g082930.1_inactive_purple_acid_phosphatase-like_protein_HC_chr4:32240714-32244145_20140818
408.825	1.41628	5.13e-08	1.53e-05	MSTRG.73880.3	3891	disease resistance protein (TIR-NBS-LRR class) [Medicago truncatula]/gi	Medtr1g007300.1_disease_resistance_protein_(TIR-NBS-LRR_class)_LC_chr1:268696-264988_20140818
107.552	1.41559	2.66e-07	5.81e-05	MSTRG.27799.1	1193	---NA---	Medtr8g036970.1_F-box_protein_interaction_domain_protein_LC_chr8:13473832-13472177_20140818
1085.7	1.4148	1.07e-05	0.00107638	36599_t	936	soluble N-ethylmaleimide-sensitive factor adaptor protein [Medicago truncatula]/gi	Medtr3g023720.1_soluble_N-ethylmaleimide-sensitive_factor_adaptor_protein_HC_chr3:7218102-7214079_20140818
110.959	1.41469	4.12e-05	0.00299404	MSTRG.58629.2	1605	TPX2 (targeting protein for Xklp2) family protein [Medicago truncatula]/gi	Medtr1g075310.1_TPX2_(targeting_protein_for_Xklp2)_family_protein_HC_chr1:33342141-33338595_20140818
156.351	1.4131	1.51e-06	0.000235668	MSTRG.81974.10	1712	E3 ubiquitin-protein ligase BRE1-like protein [Medicago truncatula]/gi	Medtr7g046250.1_E3_ubiquitin-protein_ligase_BRE1-like_protein_HC_chr7:16333806-16352752_20140818
195.37	1.41193	0.00107267	0.0304914	MSTRG.68405.44	894	hypothetical protein L195_g054481 partial [Trifolium pratense]	Medtr8g089030.2_TRAF_superfamily_protein,_putative_LC_chr8:37006804-36995677_20140818
55.3759	1.41141	0.00171452	0.0419352	MSTRG.14259.15	1066	polyadenylation and cleavage factor 11-like protein [Trifolium pratense]	Medtr6g011450.2_PCF11P-related_protein_HC_chr6:3248562-3252804_20140818
53.4493	1.41138	0.00134597	0.0354929	MSTRG.83942.1	325	ubiquitin-activating enzyme E1 1 [Medicago truncatula]/gi	Medtr5g072480.3_ubiquitin-activating_enzyme_E1_1_HC_chr5:30837418-30830993_20140818
163.755	1.41037	1.35e-08	4.85e-06	MSTRG.89339.5	1085	hypothetical protein L195_g031334 [Trifolium pratense]	Medtr3g006170.1_retinoblastoma-related_protein,_putative_HC_chr3:570880-569693_20140818
111.603	1.41018	0.00204698	0.0471417	MSTRG.77977.1	748	hypothetical protein MTR_7g012940 [Medicago truncatula]/gi	Medtr7g012940.1_hypothetical_protein_HC_chr7:3661702-3659291_20140818
157.954	1.40857	4.52e-06	0.000551545	157571_t	2181	S-locus lectin kinase family protein [Medicago truncatula]/gi	Medtr0090s0020.1_S-locus_lectin_kinase_family_protein_HC_scaffold0090:10869-7455_20140818
73.8053	1.40643	0.000575026	0.0199992	MSTRG.54860.26	3344	paired amphipathic helix SIN3-like protein [Medicago truncatula]/gi	Medtr8g062700.2_paired_amphipathic_helix_SIN3-like_protein_HC_chr8:26215827-26198402_20140818
87.8138	1.40561	0.000584899	0.0202443	MSTRG.79054.1	1657	Pmr5/Cas1p GDSL/SGNH-like acyl-esterase family protein [Medicago truncatula]/gi	Medtr3g070900.1_Pmr5/Cas1p_GDSL/SGNH-like_acyl-esterase_family_protein_HC_chr3:31820635-31823812_20140818
121.169	1.40506	1.76e-05	0.00158237	MSTRG.10759.5	1511	hypothetical protein MTR_3g080743 [Medicago truncatula]/gi	Medtr3g080743.1_hypothetical_protein_HC_chr3:36547098-36545266_20140818
58.3938	1.40494	0.00178575	0.0431556	MSTRG.3095.1	1137	alpha 14-glycosyltransferase family protein [Medicago truncatula]/gi	Medtr4g084060.1_alpha_1,4-glycosyltransferase_family_protein_HC_chr4:32736243-32732684_20140818
58.4337	1.40492	0.000913042	0.0273281	MSTRG.37281.1	887	pathogenesis-related protein bet V I family protein [Medicago truncatula]/gi	Medtr3g055130.1_pathogenesis-related_protein_bet_V_I_family_protein_HC_chr3:21661924-21660763_20140818
95.7992	1.40456	0.000316599	0.0132241	MSTRG.33592.3	1730	PREDICTED: zeaxanthin epoxidase chloroplastic-like [Cicer arietinum]	Medtr1g011700.1_FAD/NAD(P)-binding_oxidoreductase_family_protein_HC_chr1:2184151-2186458_20140818
131.555	1.4042	0.00050837	0.0183072	MSTRG.56707.1	1734	F-box protein interaction domain protein [Medicago truncatula]/gi	Medtr3g030240.1_F-box_protein_interaction_domain_protein_LC_chr3:9562952-9559856_20140818
266.346	1.40331	0.000602241	0.0206837	MSTRG.89433.5	1790	F-box/RNI/FBD-like domain protein [Medicago truncatula]/gi	Medtr2g047848.1_F-box/RNI/FBD-like_domain_protein_LC_chr2:20923213-20924731_20140818
54.9497	1.40313	0.000516529	0.0184893	MSTRG.87583.2	990	---NA---	Medtr1g085600.1_hypothetical_protein_HC_chr1:38240615-38237478_20140818
81.4277	1.40232	0.000161109	0.00810103	MSTRG.36767.1	1337	---NA---	Medtr3g109800.2_class_III_homeodomain_leucine_zipper_protein_HC_chr3:51353936-51359759_20140818
223.778	1.40215	0.000542669	0.0191769	MSTRG.21961.1	1574	unknown [Medicago truncatula]	Medtr2g076590.1_epidermis-specific_secreted_EP1-like_glycoprotein_HC_chr2:32063871-32065553_20140818
39.6598	1.40133	0.00108531	0.0307438	MSTRG.82758.1	971	gibberellin-regulated family protein [Medicago truncatula]/gi	Medtr8g075920.1_gibberellin-regulated_family_protein_HC_chr8:32110372-32113123_20140818
88.8834	1.40132	4.86e-09	1.98e-06	MSTRG.1142.17	2396	zein-binding protein [Medicago truncatula]/gi	Medtr0168s0060.1_zein-binding_protein_HC_scaffold0168:18855-21061_20140818
182.012	1.39829	0.00198134	0.0461229	MSTRG.77557.1	2085	PREDICTED: uncharacterized protein LOC101492457 isoform X1 [Cicer arietinum]	Medtr3g011100.1_F-box_and_associated_interaction_domain_protein_HC_chr3:2698683-2696484_20140818
242.531	1.39813	0.000773506	0.0244807	MSTRG.59343.20	1079	---NA---	Medtr3g083130.1_aldo/keto_reductase_family_oxidoreductase_HC_chr3:37505830-37503715_20140818
226.619	1.39757	0.000859968	0.026314	MSTRG.59343.13	1514	PREDICTED: NAD(P)H-dependent 6'-deoxychalcone synthase-like [Cicer arietinum]	Medtr3g083130.1_aldo/keto_reductase_family_oxidoreductase_HC_chr3:37505830-37503715_20140818
186.964	1.39732	0.00182722	0.0438002	MSTRG.77557.2	2078	PREDICTED: uncharacterized protein LOC101492457 isoform X1 [Cicer arietinum]	Medtr3g011100.1_F-box_and_associated_interaction_domain_protein_HC_chr3:2698683-2696484_20140818
439.207	1.39728	6.98e-09	2.73e-06	24124_t	3912	NB-ARC domain protein [Medicago truncatula]/gi	Medtr6g071935.1_NB-ARC_domain_protein_LC_chr6:26646248-26651415_20140818
116.886	1.39605	0.000651288	0.0218396	MSTRG.56707.2	1519	F-box protein interaction domain protein [Medicago truncatula]/gi	Medtr3g030250.1_F-box_protein_interaction_domain_protein_LC_chr3:9566872-9564085_20140818
79.2633	1.39547	2.41e-06	0.000338618	MSTRG.1142.3	2498	zein-binding protein [Medicago truncatula]/gi	Medtr0168s0060.1_zein-binding_protein_HC_scaffold0168:18855-21061_20140818
430.947	1.39532	7.83e-08	2.16e-05	MSTRG.73880.1	3916	NB-ARC domain protein [Medicago truncatula]/gi	Medtr6g071935.1_NB-ARC_domain_protein_LC_chr6:26646248-26651415_20140818
191.628	1.39448	0.000161568	0.00811097	54673_t	918	secretory carrier-associated membrane protein [Medicago truncatula]/gi	Medtr4g090510.1_secretory_carrier-associated_membrane_protein_HC_chr4:35885058-35890557_20140818
132.469	1.39428	7.74e-07	0.000136137	8032_t	1941	TCP-1/cpn60 chaperonin family protein [Medicago truncatula]/gi	Medtr1g017380.1_TCP-1/cpn60_chaperonin_family_protein_HC_chr1:4821544-4827364_20140818
123.561	1.39404	0.000133854	0.0071163	MSTRG.83094.6	4751	PREDICTED: uncharacterized protein LOC101504500 isoform X1 [Cicer arietinum]/gi	Medtr3g062420.1_LRR_and_NB-ARC_domain_disease_resistance_protein,_putative_LC_chr3:28175773-28188696_20140818
538.003	1.39356	9.27e-05	0.00539528	MSTRG.43380.15	1177	---NA---	Medtr4g065113.1_extensin-like_region_protein_LC_chr4:24482862-24481165_20140818
781.28	1.3929	5.07e-06	0.000602377	MSTRG.89080.3	592	---NA---	Medtr3g014608.1_transmembrane_protein,_putative_LC_chr3:4176894-4177520_20140818
275.114	1.39044	0.000589545	0.0203824	MSTRG.89433.2	1830	F-box/RNI/FBD-like domain protein [Medicago truncatula]/gi	Medtr2g047848.1_F-box/RNI/FBD-like_domain_protein_LC_chr2:20923213-20924731_20140818
87.5213	1.3903	4.04e-05	0.00295038	MSTRG.58896.43	524	---NA---	---NA---
158.921	1.39005	0.000472117	0.0174215	MSTRG.84501.1	1707	hypothetical protein TSUD_253520 [Trifolium subterraneum]	Medtr7g086210.1_hypothetical_protein_LC_chr7:33433930-33432245_20140818
42.7619	1.38864	0.000157142	0.00796102	MSTRG.51355.1	1057	GYF domain protein [Medicago truncatula]/gi	Medtr7g027680.1_GYF_domain_protein_HC_chr7:9335311-9344460_20140818
98.8506	1.38838	0.000907039	0.0272221	MSTRG.73990.1	243	---NA---	---NA---
53.2779	1.38682	6.25e-06	0.000709497	MSTRG.47263.8	803	PREDICTED: RNA pseudouridine synthase 3 mitochondrial [Cicer arietinum]	Medtr7g029385.1_RNA_pseudouridine_synthase_HC_chr7:10453073-10460793_20140818
150.133	1.38674	1.1e-05	0.00110003	MSTRG.13365.1	5789	hypothetical protein TSUD_89960 [Trifolium subterraneum]	Medtr3g085530.1_PIF1-like_helicase_LC_chr3:38658911-38655923_20140818
106.719	1.38588	0.000117557	0.00645941	MSTRG.84501.4	1338	hypothetical protein TSUD_253520 [Trifolium subterraneum]	Medtr7g086210.1_hypothetical_protein_LC_chr7:33433930-33432245_20140818
441.368	1.38543	5.37e-05	0.00362268	36088_t	1542	fructan exohydrolase [Medicago truncatula]/gi	Medtr1g015970.1_fructan_exohydrolase_HC_chr1:4139183-4135963_20140818
41.7714	1.38525	0.000492821	0.0179433	MSTRG.80115.3	1331	Pmr5/Cas1p GDSL/SGNH-like acyl-esterase family protein [Medicago truncatula]/gi	Medtr4g121560.1_Pmr5/Cas1p_GDSL/SGNH-like_acyl-esterase_family_protein_HC_chr4:50244941-50243151_20140818
181.305	1.38451	0.000202788	0.00961333	MSTRG.66680.5	1182	mediator of RNA polymerase II transcription subunit-like protein putative [Medicago truncatula]/gi	Medtr8g017180.1_mediator_of_RNA_polymerase_II_transcription_subunit-like_protein,_putative_HC_chr8:5777388-5772992_20140818
120.717	1.38339	4.46e-05	0.00317586	MSTRG.25317.2	5165	disease resistance protein (TIR-NBS-LRR class) putative [Medicago truncatula]/gi	Medtr4g020590.1_disease_resistance_protein_(TIR-NBS-LRR_class),_putative_LC_chr4:6594472-6586360_20140818
270.325	1.38339	0.000766883	0.0243473	MSTRG.66621.1	1075	hypothetical protein MTR_3g019060 [Medicago truncatula]/gi	Medtr3g019060.1_hypothetical_protein_HC_chr3:5308654-5310320_20140818
251.97	1.38324	1.05e-08	3.91e-06	MSTRG.45021.6	658	---NA---	---NA---
97.7127	1.38236	0.000512306	0.0183914	MSTRG.86196.10	1870	global transcription factor [Medicago truncatula]/gi	Medtr7g088700.1_global_transcription_factor_HC_chr7:34591539-34580098_20140818
53.1511	1.38196	0.000231968	0.0105848	MSTRG.43880.2	610	bifunctional aspartate aminotransferase and glutamate/aspartate-prephenate aminotransferase-like protein [Trifolium pratense]	Medtr7g106830.1_aspartate_aminotransferase_HC_chr7:43516177-43513083_20140818
80.7652	1.38129	3.47e-05	0.0026491	MSTRG.61268.9	963	glutathione S-transferase amino-terminal domain protein [Medicago truncatula]/gi	Medtr8g098430.1_glutathione_S-transferase,_amino-terminal_domain_protein_HC_chr8:40882266-40879266_20140818
119.025	1.38117	6.86e-05	0.00434401	MSTRG.12882.3	558	40S ribosomal protein S6-2 [Glycine soja]	Medtr7g053160.1_40S_ribosomal_protein_S6-2_HC_chr7:18698849-18702010_20140818
51.3972	1.38104	0.00169139	0.0416059	MSTRG.1142.15	2226	zein-binding protein [Medicago truncatula]/gi	Medtr0168s0060.1_zein-binding_protein_HC_scaffold0168:18855-21061_20140818
126.862	1.38103	4.1e-07	8.13e-05	188751_t	1449	transducin/WD-like repeat-protein [Medicago truncatula]/gi	Medtr7g084810.1_transducin/WD-like_repeat-protein_HC_chr7:32739181-32737587_20140818
69.172	1.38059	0.000704158	0.0230682	MSTRG.29697.1	3504	NBS-LRR type disease resistance protein [Medicago truncatula]/gi	Medtr3g021380.1_NBS-LRR_type_disease_resistance_protein_LC_chr3:6260285-6256594_20140818
155.439	1.37865	1.34e-05	0.0012798	MSTRG.73428.2	897	---NA---	---NA---
81.9083	1.37708	0.000399371	0.0156044	MSTRG.81864.1	1702	CD2 antigen cytoplasmic tail-binding-like protein [Medicago truncatula]/gi	Medtr2g008810.1_CD2_antigen_cytoplasmic_tail-binding-like_protein_HC_chr2:1625137-1630690_20140818
97.6596	1.37685	0.000987718	0.0288498	MSTRG.55806.2	993	UDP-glucosyltransferase family protein [Medicago truncatula]/gi	Medtr6g038240.1_UDP-glucosyltransferase_family_protein_LC_chr6:13697488-13695306_20140818
65.722	1.37671	0.00161872	0.0403825	MSTRG.66167.1	357	---NA---	---NA---
65.8852	1.37657	4.03e-05	0.00295038	MSTRG.3096.1	828	hypothetical protein MTR_0338s0050 [Medicago truncatula]/gi	Medtr0338s0050.1_hypothetical_protein_LC_scaffold0338:17529-16142_20140818
98.9094	1.37615	0.00025337	0.0112407	MSTRG.51482.1	582	---NA---	---NA---
441.249	1.37444	0.000150784	0.00771717	MSTRG.69730.1	300	---NA---	---NA---
58.6921	1.37408	0.000383931	0.0151772	88024_t	1404	P-loop nucleoside triphosphate hydrolase superfamily protein [Medicago truncatula]/gi	Medtr1g022250.1_P-loop_nucleoside_triphosphate_hydrolase_superfamily_protein_HC_chr1:6970364-6972206_20140818
466.806	1.37365	2.5e-07	5.55e-05	MSTRG.35438.3	1994	unknown [Medicago truncatula]/gi	Medtr1g114640.1_GRAM_domain_protein/ABA-responsive-like_protein_HC_chr1:51754431-51753109_20140818
124.819	1.37103	0.00100574	0.0292109	59981_t	4290	disease resistance protein (TIR-NBS-LRR class) [Medicago truncatula]/gi	Medtr4g020490.1_disease_resistance_protein_(TIR-NBS-LRR_class)_LC_chr4:6504602-6497070_20140818
402.62	1.37084	1.29e-12	1.65e-09	MSTRG.9198.3	1383	unknown [Medicago truncatula]/gi	Medtr4g021410.1_aldo/keto_reductase_family_oxidoreductase_HC_chr4:6956705-6962668_20140818
144.748	1.37034	2.04e-05	0.00176487	MSTRG.16814.1	1474	stress up-regulated Nod 19 protein [Medicago truncatula]/gi	Medtr2g030470.1_stress_up-regulated_Nod_19_protein_LC_chr2:11471036-11480994_20140818
1049.41	1.37015	6.77e-08	1.91e-05	MSTRG.27488.10	10275	hypothetical protein PHAVU_010G091100g [Phaseolus vulgaris]/gi	Medtr8g028500.1_Rpp4C1_HC_chr8:10848011-10860059_20140818
89.5814	1.36985	0.000454083	0.0169798	MSTRG.32816.2	1522	SPFH/band 7/PHB domain membrane-associated family protein [Medicago truncatula]/gi	Medtr4g107810.2_SPFH/band_7/PHB_domain_membrane-associated_family_protein_HC_chr4:44680209-44683641_20140818
107.108	1.36984	0.00220036	0.049504	MSTRG.43284.1	404	GDA1/CD39 nucleoside phosphatase family protein [Medicago truncatula]/gi	Medtr5g040710.1_GDA1/CD39_nucleoside_phosphatase_family_protein_HC_chr5:17904122-17894581_20140818
271.368	1.36958	0.00080513	0.0251063	MSTRG.37713.1	839	hypothetical protein MTR_6g089960 [Medicago truncatula]/gi	Medtr6g089960.1_hypothetical_protein_HC_chr6:34136216-34135682_20140818
74.2479	1.36837	1.79e-05	0.00160846	MSTRG.2829.2	889	2OG-Fe(II) oxygenase family oxidoreductase [Medicago truncatula]/gi	Medtr0314s0030.1_2OG-Fe(II)_oxygenase_family_oxidoreductase_HC_scaffold0314:17701-8404_20140818
83.0519	1.36818	0.000366645	0.0147192	MSTRG.87583.3	1791	---NA---	Medtr1g085600.1_hypothetical_protein_HC_chr1:38240615-38237478_20140818
115.487	1.36749	0.0020574	0.0472638	MSTRG.44698.6	2102	myb-like transcription factor family protein [Medicago truncatula]/gi	Medtr2g027860.1_myb-like_transcription_factor_family_protein_HC_chr2:10218231-10226352_20140818
105.388	1.36593	0.00028847	0.0123522	MSTRG.82217.1	314	F-box protein PP2-A13 [Medicago truncatula]/gi	Medtr0002s0020.1_F-box_protein_PP2-A13_HC_scaffold0002:6674-10318_20140818
57.6173	1.36554	0.000425912	0.0162921	MSTRG.2829.1	1135	2OG-Fe(II) oxygenase family oxidoreductase [Medicago truncatula]/gi	Medtr0314s0030.1_2OG-Fe(II)_oxygenase_family_oxidoreductase_HC_scaffold0314:17701-8404_20140818
141.656	1.36509	0.00142689	0.0370527	MSTRG.30467.4	663	tRNA (guanine-N(1))-methyltransferase putative [Medicago truncatula]/gi	Medtr1g024920.1_tRNA_(guanine-N(1))-methyltransferase,_putative_HC_chr1:7942696-7935263_20140818
62.2156	1.36433	0.000770305	0.0244143	MSTRG.53181.3	1165	hypothetical protein MTR_5g027710 [Medicago truncatula]/gi	Medtr5g027710.1_hypothetical_protein_LC_chr5:11562348-11562046_20140818
50.0651	1.36429	0.00115402	0.0321205	MSTRG.62530.1	415	unknown [Medicago truncatula]	Medtr4g052340.1_short-chain_dehydrogenase/reductase_HC_chr4:18939759-18938569_20140818
66.7145	1.36347	0.000114716	0.00633357	MSTRG.24677.9	3591	neutral alpha-glucosidase [Medicago truncatula]/gi	Medtr5g026610.1_neutral_alpha-glucosidase_HC_chr5:10956765-10969165_20140818
83.1356	1.36216	5.83e-05	0.00384749	MSTRG.43963.1	347	---NA---	---NA---
79.6073	1.36214	0.000572977	0.0199431	MSTRG.79817.1	316	---NA---	---NA---
142.343	1.36159	4.07e-05	0.00296689	MSTRG.84055.3	1402	hypothetical protein TSUD_392210 [Trifolium subterraneum]	Medtr1g070355.1_FAR1_DNA-binding_domain_protein_LC_chr1:31110429-31113072_20140818
79.9714	1.3598	0.000582067	0.0201779	77232_t	4431	ABC transporter B family-like protein [Medicago truncatula]/gi	Medtr8g022270.1_ABC_transporter_B_family-like_protein_HC_chr8:7869135-7861470_20140818
491.246	1.35942	8.39e-08	2.29e-05	MSTRG.83961.9	1808	UDP-glucosyltransferase family protein [Medicago truncatula]/gi	Medtr5g072820.1_UDP-glucosyltransferase_family_protein_HC_chr5:30989979-30993244_20140818
985.682	1.35882	5.27e-05	0.00357772	MSTRG.89080.1	1015	hypothetical protein MTR_2g020150 [Medicago truncatula]/gi	Medtr2g020150.1_hypothetical_protein_LC_chr2:6680303-6682594_20140818
135.268	1.35656	1.68e-06	0.00025644	MSTRG.72118.16	1640	glycosyltransferase family 90 protein [Medicago truncatula]/gi	Medtr8g031470.1_glycosyltransferase_family_90_protein_HC_chr8:11807748-11811706_20140818
187.827	1.35423	4.14e-05	0.00300146	MSTRG.48135.2	3345	protein FAR1-related sequence 5-like [Trifolium pratense]	Medtr7g446480.1_hypothetical_protein_LC_chr7:15845592-15844432_20140818
220.966	1.35283	0.000256966	0.0113503	MSTRG.61467.1	367	galactose oxidase/kelch repeat protein [Medicago truncatula]/gi	Medtr2g069030.1_galactose_oxidase/kelch_repeat_protein_HC_chr2:28678549-28675729_20140818
138.055	1.35195	0.000494043	0.0179757	MSTRG.3909.1	754	cationic amino acid transporter 2 vacuolar protein [Medicago truncatula]/gi	Medtr7g086610.1_cationic_amino_acid_transporter_2,_vacuolar_protein_HC_chr7:33640600-33647142_20140818
108.5	1.35173	2.89e-07	6.19e-05	MSTRG.1142.5	2499	zein-binding protein [Medicago truncatula]/gi	Medtr0168s0060.1_zein-binding_protein_HC_scaffold0168:18855-21061_20140818
63.6621	1.34824	1.71e-05	0.00154663	MSTRG.86196.11	1062	hypothetical protein CRG98_045230 [Punica granatum]	Medtr4g009840.1_topless-like_protein_HC_chr4:2077221-2085811_20140818
80.3263	1.34755	0.000570058	0.0198727	MSTRG.38171.3	2414	hypothetical protein TSUD_408680 [Trifolium subterraneum]	Medtr8g045280.1_DUF4283_domain_protein_LC_chr8:17686445-17683874_20140818
71.5171	1.34603	0.00020193	0.00959167	98941_t	2688	hypothetical protein LR48_Vigan08g137300 [Vigna angularis]	Medtr7g010360.1_RNA_recognition_motif_LC_chr7:2533493-2542856_20140818
186.993	1.34598	0.00171597	0.041947	MSTRG.30467.3	812	tRNA (guanine-N(1))-methyltransferase putative [Medicago truncatula]/gi	Medtr1g024920.1_tRNA_(guanine-N(1))-methyltransferase,_putative_HC_chr1:7942696-7935263_20140818
108.32	1.34495	0.000833062	0.0257245	185506_t	402	Non-symbiotic hemoglobin [Medicago truncatula]/gi	Medtr4g068860.1_Non-symbiotic_hemoglobin_HC_chr4:25846162-25844617_20140818
74.9426	1.34468	6.89e-05	0.00435641	MSTRG.39584.1	1455	---NA---	---NA---
62.9653	1.34394	0.00053014	0.0188372	MSTRG.87750.2	500	hypothetical protein MTR_0044s0250 [Medicago truncatula]/gi	Medtr0044s0250.1_hypothetical_protein_LC_scaffold0044:70407-70643_20140818
90.6558	1.3418	0.000876484	0.0266301	114784_t	1242	cytochrome P450 family 71 protein [Medicago truncatula]/gi	Medtr4g048580.1_cytochrome_P450_family_71_protein_HC_chr4:17250064-17248200_20140818
95.3853	1.34175	0.000440133	0.0166156	MSTRG.37707.1	1290	MAP kinase kinase [Medicago truncatula]/gi	Medtr6g090470.1_MAP_kinase_kinase_HC_chr6:34058518-34052726_20140818
71.8484	1.33934	3.74e-05	0.00279103	MSTRG.13845.15	2014	PREDICTED: callose synthase 7 isoform X2 [Cicer arietinum]/gi	Medtr3g047390.1_callose_synthase-like_protein_HC_chr3:15805174-15818429_20140818
133.163	1.3392	2.2e-05	0.00186852	MSTRG.4870.8	384	glutathione S-transferase [Medicago truncatula]/gi	Medtr7g065260.1_glutathione_S-transferase_HC_chr7:23798295-23796391_20140818
164.81	1.33884	9.45e-09	3.55e-06	11076_t	3954	disease resistance protein (TIR-NBS-LRR class) [Medicago truncatula]/gi	Medtr1g052170.1_disease_resistance_protein_(TIR-NBS-LRR_class)_HC_chr1:21057285-21062438_20140818
67.6022	1.33827	3.76e-06	0.000478218	178449_t	1704	PPR containing plant-like protein [Medicago truncatula]/gi	Medtr3g033040.2_PPR_containing_plant-like_protein_HC_chr3:10491879-10488531_20140818
172.327	1.33769	0.00166918	0.0412508	MSTRG.28921.2	3125	disease resistance protein (TIR-NBS-LRR class) putative [Medicago truncatula]/gi	Medtr4g080777.1_disease_resistance_protein_(TIR-NBS-LRR_class),_putative_LC_chr4:31243045-31248009_20140818
56.9377	1.33759	0.00107261	0.0304914	88034_t	933	erythronate-4-phosphate dehydrogenase family protein [Medicago truncatula]/gi	Medtr1g022190.4_erythronate-4-phosphate_dehydrogenase_family_protein_HC_chr1:6938356-6935146_20140818
46.0917	1.33685	0.00137955	0.0361936	13453_t	459	WRKY family transcription factor [Medicago truncatula]/gi	Medtr1g015140.1_WRKY_family_transcription_factor_HC_chr1:3734958-3734089_20140818
99.0021	1.33589	0.000418213	0.0161052	141008_t	3327	PREDICTED: leucine-rich repeat receptor protein kinase MSP1-like isoform X2 [Cicer arietinum]	Medtr7g066590.1_LRR_receptor-like_kinase_HC_chr7:24243931-24241034_20140818
92.0268	1.33455	0.000308824	0.0129904	MSTRG.32816.3	1455	SPFH/band 7/PHB domain membrane-associated family protein [Medicago truncatula]/gi	Medtr4g107810.2_SPFH/band_7/PHB_domain_membrane-associated_family_protein_HC_chr4:44680209-44683641_20140818
174.992	1.33369	2.24e-07	5.06e-05	MSTRG.89339.6	1074	hypothetical protein L195_g031334 [Trifolium pratense]	Medtr3g006170.1_retinoblastoma-related_protein,_putative_HC_chr3:570880-569693_20140818
212.911	1.33316	4.99e-07	9.56e-05	MSTRG.35438.2	1752	unknown [Medicago truncatula]/gi	Medtr1g114640.1_GRAM_domain_protein/ABA-responsive-like_protein_HC_chr1:51754431-51753109_20140818
262.949	1.33235	0.000495949	0.0180077	MSTRG.66621.2	1033	hypothetical protein MTR_3g019060 [Medicago truncatula]/gi	Medtr3g019060.1_hypothetical_protein_HC_chr3:5308654-5310320_20140818
235.297	1.3299	0.00020199	0.00959167	MSTRG.46079.1	301	catalase-1 precursor [Panax ginseng]	Medtr3g115370.2_catalase_heme-binding_enzyme_HC_chr3:53951147-53954902_20140818
81.8802	1.32935	0.000497625	0.0180364	MSTRG.36767.2	1072	---NA---	Medtr2g101190.1_class_III_homeodomain_leucine_zipper_protein_HC_chr2:43512049-43503468_20140818
118.351	1.32903	0.000639033	0.0215969	MSTRG.33592.1	2054	FAD/NAD(P)-binding oxidoreductase family protein [Medicago truncatula]/gi	Medtr1g011700.1_FAD/NAD(P)-binding_oxidoreductase_family_protein_HC_chr1:2184151-2186458_20140818
244.248	1.329	0.000102752	0.00584085	MSTRG.85110.1	1474	enoyl-(acyl carrier) reductase [Medicago truncatula]/gi	Medtr3g086210.1_enoyl-(acyl_carrier)_reductase_HC_chr3:39005512-39008234_20140818
81.1025	1.32883	0.00185794	0.0442484	MSTRG.1879.4	1380	sugar porter (SP) family MFS transporter [Medicago truncatula]/gi	Medtr4g118610.2_sugar_porter_(SP)_family_MFS_transporter_HC_chr4:49131241-49135079_20140818
104.247	1.32775	0.000124475	0.0067639	MSTRG.89421.3	2019	pleiotropic drug resistance subfamily G protein [Medicago truncatula]/gi	Medtr5g070320.1_pleiotropic_drug_resistance_subfamily_G_protein_HC_chr5:29768959-29781810_20140818
719.269	1.3277	7.06e-07	0.000125896	MSTRG.14402.2	5859	anaphase-promoting complex subunit 1 [Medicago truncatula]/gi	Medtr5g082890.1_anaphase-promoting_complex_subunit_1_HC_chr5:35723483-35692350_20140818
137.026	1.32708	3.97e-05	0.00291901	39216_t	642	DUF761 domain protein [Medicago truncatula]/gi	Medtr1g053900.1_DUF761_domain_protein_HC_chr1:22870671-22869609_20140818
732.675	1.32686	8.34e-07	0.000145454	MSTRG.14402.4	5668	anaphase-promoting complex subunit 1 [Medicago truncatula]/gi	Medtr5g082890.1_anaphase-promoting_complex_subunit_1_HC_chr5:35723483-35692350_20140818
60.4366	1.32571	0.000343028	0.0140589	174118_t	483	Dof domain zinc finger protein [Medicago truncatula]/gi	Medtr2g016030.1_Dof_domain_zinc_finger_protein_HC_chr2:4822571-4821709_20140818
89.2506	1.32313	0.000187228	0.00905581	MSTRG.76591.2	757	---NA---	Medtr3g037620.1_hypothetical_protein_LC_chr3:13819797-13819167_20140818
378.423	1.32277	0.00107971	0.0306188	MSTRG.80450.4	1048	transmembrane protein putative [Medicago truncatula]/gi	Medtr3g015420.1_transmembrane_protein,_putative_HC_chr3:4461069-4459937_20140818
91.4661	1.32062	0.000686485	0.0226605	MSTRG.76303.5	1396	ankyrin-like protein partial [Trifolium pratense]	Medtr5g028450.1_ankyrin_repeat_protein_HC_chr5:11920758-11918772_20140818
265.326	1.31885	0.000175293	0.00861759	MSTRG.58896.26	657	proline-rich protein [Glycine max]	---NA---
84.6719	1.31841	0.00170691	0.0418551	188488_t	1854	zinc finger BED domain-containing protein RICESLEEPER 2-like [Arachis ipaensis]	Medtr5g034530.1_hypothetical_protein_LC_chr5:14993712-14993306_20140818
84.8559	1.31665	0.000736204	0.0237007	15070_t	1908	cysteine-rich receptor-like kinase [Medicago truncatula]/gi	Medtr8g041880.1_cysteine-rich_receptor-like_kinase_HC_chr8:15802331-15798924_20140818
328.255	1.31639	6.07e-06	0.000693555	MSTRG.16647.2	5691	disease resistance protein RGA4 [Medicago truncatula]/gi	Medtr5g070960.1_disease_resistance_protein_RGA4_HC_chr5:30062044-30058913_20140818
131.378	1.3132	0.000296731	0.0126184	MSTRG.65933.1	1333	F-box/RNI/FBD-like domain protein [Medicago truncatula]/gi	Medtr8g468840.1_F-box/RNI/FBD-like_domain_protein_LC_chr8:24957855-24959753_20140818
58.2626	1.3129	0.000634674	0.0214777	MSTRG.11410.5	1398	LNS2 (lipin/Ned1/Smp2) protein [Medicago truncatula]/gi	Medtr3g101590.1_LNS2_(lipin/Ned1/Smp2)_protein_HC_chr3:46757881-46765914_20140818
53.116	1.31261	8.91e-05	0.00524078	27845_t	3416	PPR containing plant-like protein [Medicago truncatula]/gi	Medtr3g023180.1_PPR_containing_plant-like_protein_HC_chr3:7000866-7006661_20140818
101.515	1.31255	1.81e-05	0.00161762	MSTRG.42934.2	463	receptor-like kinase [Medicago truncatula]/gi	Medtr1g031460.1_receptor-like_kinase_HC_chr1:10989946-10993485_20140818
66.3196	1.3109	0.00181278	0.0435951	MSTRG.27167.19	1380	DUF674 family protein [Medicago truncatula]/gi	Medtr7g066340.1_DUF674_family_protein_LC_chr7:24146371-24144089_20140818
101.227	1.30872	0.000238451	0.0107824	MSTRG.9544.3	753	methyl esterase [Medicago truncatula]/gi	Medtr5g018365.1_methyl_esterase_HC_chr5:6842052-6844288_20140818
719.183	1.30606	1.57e-07	3.86e-05	MSTRG.35438.5	2019	unknown [Medicago truncatula]/gi	Medtr1g114640.1_GRAM_domain_protein/ABA-responsive-like_protein_HC_chr1:51754431-51753109_20140818
115.67	1.30565	6.84e-05	0.00433933	MSTRG.39086.2	1038	chromosome condensation regulator RCC1 repeat protein [Medicago truncatula]/gi	Medtr2g079610.1_chromosome_condensation_regulator_RCC1_repeat_protein_HC_chr2:33529723-33536433_20140818
399.075	1.30473	1.45e-09	6.98e-07	MSTRG.40325.6	1664	transmembrane protein putative [Medicago truncatula]/gi	Medtr1g060590.1_calmodulin-binding_family_protein_HC_chr1:26377825-26373830_20140818
62.7667	1.3042	0.000920413	0.0274956	MSTRG.25349.7	1682	tyrosine kinase family protein [Medicago truncatula]/gi	Medtr3g067795.1_tyrosine_kinase_family_protein_HC_chr3:30419973-30424611_20140818
248.936	1.30208	0.000471259	0.0174104	MSTRG.43380.6	1153	---NA---	Medtr4g065113.1_extensin-like_region_protein_LC_chr4:24482862-24481165_20140818
202.463	1.30163	1.36e-05	0.00129556	MSTRG.76153.29	2980	elongation factor Ts protein [Medicago truncatula]/gi	Medtr6g088270.1_elongation_factor_Ts_protein_HC_chr6:33420399-33413908_20140818
156.851	1.30029	0.000428206	0.0163436	MSTRG.23684.4	4504	disease resistance protein (TIR-NBS-LRR class) putative [Medicago truncatula]/gi	Medtr8g032830.1_disease_resistance_protein_(TIR-NBS-LRR_class),_putative_LC_chr8:12588216-12593933_20140818
67.7099	1.29935	7.44e-05	0.00460604	MSTRG.17577.1	1820	hypothetical protein MTR_5g091720 [Medicago truncatula]/gi	Medtr5g091720.1_hypothetical_protein_HC_chr5:40026536-40023444_20140818
302.547	1.29725	1.3e-05	0.00125199	MSTRG.15016.2	1888	cinnamyl alcohol dehydrogenase [Medicago truncatula]/gi	Medtr8g062440.3_cinnamyl_alcohol_dehydrogenase_HC_chr8:26099734-26103927_20140818
142.017	1.29683	0.000512509	0.0183921	59234_t	4365	disease resistance protein (TIR-NBS-LRR class) [Medicago truncatula]/gi	Medtr4g020490.1_disease_resistance_protein_(TIR-NBS-LRR_class)_LC_chr4:6504602-6497070_20140818
54.6654	1.29414	0.000470721	0.0173962	MSTRG.58629.8	613	---NA---	---NA---
49.1318	1.29371	0.00211522	0.0481973	135851_t	1911	short-chain dehydrogenase/reductase [Medicago truncatula]/gi	Medtr7g105460.1_short-chain_dehydrogenase/reductase_HC_chr7:42767773-42769796_20140818
192.62	1.29279	2.45e-06	0.000343284	99010_t	1365	hypothetical protein L195_g031334 [Trifolium pratense]	Medtr3g006170.1_retinoblastoma-related_protein,_putative_HC_chr3:570880-569693_20140818
56.3199	1.29245	0.000765593	0.0243247	MSTRG.82634.2	1459	50S ribosomal protein L3P [Medicago truncatula]/gi	Medtr6g006970.1_50S_ribosomal_protein_L3P_HC_chr6:1316494-1310518_20140818
80.3428	1.29204	0.000512167	0.0183914	MSTRG.82971.2	773	substrate carrier family protein [Medicago truncatula]/gi	Medtr6g092160.2_substrate_carrier_family_protein_HC_chr6:34737917-34740612_20140818
97.2811	1.29195	0.00191315	0.0451165	MSTRG.4764.3	1106	---NA---	---NA---
46.0572	1.29177	0.00058449	0.0202438	MSTRG.62141.2	782	---NA---	---NA---
38.1739	1.29166	0.00184612	0.0440888	MSTRG.51355.2	989	GYF domain protein [Medicago truncatula]/gi	Medtr7g027680.1_GYF_domain_protein_HC_chr7:9335311-9344460_20140818
76.7046	1.29156	0.000290695	0.0124098	MSTRG.74403.2	1336	F-box protein interaction domain protein [Medicago truncatula]/gi	Medtr1g055175.1_F-box_protein_interaction_domain_protein_LC_chr1:24352771-24353770_20140818
385.965	1.29073	8.98e-05	0.00526924	MSTRG.89433.6	1600	F-box/RNI/FBD-like domain protein [Medicago truncatula]/gi	Medtr2g047848.1_F-box/RNI/FBD-like_domain_protein_LC_chr2:20923213-20924731_20140818
92.3404	1.28986	0.000271824	0.0118519	MSTRG.1281.3	2411	---NA---	---NA---
68.6817	1.28911	0.000316511	0.013224	30657_t	1527	Putative non-LTR retroelement reverse transcriptase related partial [Medicago truncatula]	Medtr3g081050.1_hypothetical_protein_LC_chr3:36710284-36708952_20140818
57.8631	1.28901	0.00123644	0.0336232	MSTRG.58449.2	697	O-fucosyltransferase family protein [Medicago truncatula]/gi	Medtr5g042200.1_O-fucosyltransferase_family_protein_HC_chr5:18563089-18558307_20140818
96.3914	1.28842	0.000122297	0.00666896	MSTRG.27799.2	921	---NA---	---NA---
53.094	1.28632	0.000462665	0.0171933	MSTRG.58629.10	711	outer membrane OMP85 family protein [Medicago truncatula]/gi	Medtr2g098110.1_outer_membrane_OMP85_family_protein_HC_chr2:41921668-41929992_20140818
220.639	1.2844	5.98e-05	0.00392166	MSTRG.17028.4	506	inhibitor of trypsin and hageman factor-like protein [Medicago truncatula]/gi	Medtr1g075340.2_inhibitor_of_trypsin_and_hageman_factor-like_protein_HC_chr1:33356256-33356876_20140818
34.8566	1.28346	0.000998086	0.0290376	MSTRG.29008.12	2423	F-box protein [Medicago truncatula]/gi	Medtr5g013660.1_F-box_protein_LC_chr5:4381920-4383246_20140818
109.022	1.28242	0.000218778	0.0101417	59272_t	5046	PREDICTED: uncharacterized protein LOC101511908 isoform X1 [Cicer arietinum]	Medtr4g021057.1_disease_resistance_protein_(TIR-NBS-LRR_class)_LC_chr4:6791029-6798592_20140818
58.4603	1.28173	0.00010977	0.00613494	50617_t	4335	hypothetical protein TSUD_125130 [Trifolium subterraneum]	Medtr3g062420.1_LRR_and_NB-ARC_domain_disease_resistance_protein,_putative_LC_chr3:28175773-28188696_20140818
60.1227	1.2807	0.000693111	0.0228124	MSTRG.11410.4	1508	LNS2 (lipin/Ned1/Smp2) protein [Medicago truncatula]/gi	Medtr3g101590.1_LNS2_(lipin/Ned1/Smp2)_protein_HC_chr3:46757881-46765914_20140818
146.414	1.2804	0.000190585	0.00916953	MSTRG.51535.1	255	hypothetical protein MTR_6g071585 [Medicago truncatula]/gi	Medtr6g071585.1_hypothetical_protein_HC_chr6:26547727-26548130_20140818
73.4888	1.27829	0.000951507	0.0281749	MSTRG.38444.5	1070	PREDICTED: uncharacterized protein LOC101502704 [Cicer arietinum]	Medtr8g063200.1_DUF4228_domain_protein_HC_chr8:26461240-26460444_20140818
198.435	1.27768	0.000631136	0.0214146	138950_t	333	ABA/WDS induced protein [Medicago truncatula]/gi	Medtr6g037220.1_ABA/WDS_induced_protein_HC_chr6:13090285-13088621_20140818
10219.6	1.27755	0.000515933	0.0184808	MSTRG.84236.1	2780	galactinol-raffinose galactosyltransferase [Medicago truncatula]/gi	Medtr7g091880.1_galactinol-raffinose_galactosyltransferase_HC_chr7:36372945-36367215_20140818
154.308	1.27726	4.89e-06	0.000585626	89567_t	2250	2-isopropylmalate synthase [Medicago truncatula]/gi	Medtr2g078470.1_2-isopropylmalate_synthase_LC_chr2:32716400-32717524_20140818
203.253	1.27693	3.39e-05	0.00260222	MSTRG.63173.13	3798	NB-ARC domain disease resistance protein [Medicago truncatula]/gi	Medtr3g466620.1_NB-ARC_domain_disease_resistance_protein_LC_chr3:27403732-27400482_20140818
135.563	1.27552	0.000792446	0.0248869	59230_t	4365	disease resistance protein (TIR-NBS-LRR class) [Medicago truncatula]/gi	Medtr4g020490.1_disease_resistance_protein_(TIR-NBS-LRR_class)_LC_chr4:6504602-6497070_20140818
94.8103	1.27551	0.00195127	0.0456845	MSTRG.4764.4	872	---NA---	---NA---
162.594	1.27528	0.00090744	0.0272238	MSTRG.20538.1	1126	hypothetical protein MTR_5g086360 [Medicago truncatula]/gi	Medtr5g086360.1_hypothetical_protein_HC_chr5:37328062-37328358_20140818
68.51	1.27371	0.000111357	0.00619228	MSTRG.57314.5	678	putative protein kinase RLK-Pelle-DLSV family [Rosa chinensis]	Medtr0148s0080.1_S-locus_lectin_kinase_family_protein_HC_scaffold0148:28890-24847_20140818
10673.8	1.27225	4.49e-05	0.00319095	MSTRG.84236.2	2911	galactinol-raffinose galactosyltransferase [Medicago truncatula]/gi	Medtr7g091880.1_galactinol-raffinose_galactosyltransferase_HC_chr7:36372945-36367215_20140818
148.085	1.27188	0.000655803	0.0219714	MSTRG.43380.22	755	---NA---	---NA---
56.1624	1.27175	0.000289347	0.0123727	MSTRG.3095.4	1748	alpha 14-glycosyltransferase family protein [Medicago truncatula]/gi	Medtr4g084060.1_alpha_1,4-glycosyltransferase_family_protein_HC_chr4:32736243-32732684_20140818
138.242	1.27136	0.00132368	0.035229	MSTRG.58896.37	546	---NA---	---NA---
300.276	1.2707	0.00157081	0.0395038	MSTRG.68114.4	426	---NA---	Medtr6g034930.1_hypothetical_protein_LC_chr6:12218765-12220282_20140818
213.982	1.27032	0.000214918	0.0100137	MSTRG.49772.8	2374	2-isopropylmalate synthase [Medicago truncatula]/gi	Medtr2g078470.1_2-isopropylmalate_synthase_LC_chr2:32716400-32717524_20140818
63.5337	1.26873	0.000215496	0.0100316	MSTRG.64083.2	1842	TPA: LysM receptor kinase 5 [Medicago truncatula]	Medtr5g086090.1_LysM_receptor_kinase_K1B_HC_chr5:37221079-37224624_20140818
180.485	1.26838	0.00110664	0.0311858	MSTRG.86695.7	1160	hypothetical protein TSUD_78490 [Trifolium subterraneum]	Medtr6g033510.2_shikimate_kinase_HC_chr6:10838651-10833939_20140818
138.794	1.26813	0.000140575	0.00735251	MSTRG.45052.3	1498	L-allo-threonine aldolase-like protein [Medicago truncatula]/gi	Medtr1g080250.2_L-allo-threonine_aldolase-like_protein_HC_chr1:35635505-35627093_20140818
177.931	1.26719	0.00129668	0.0346605	MSTRG.86695.6	1241	hypothetical protein TSUD_78490 [Trifolium subterraneum]	Medtr6g033510.2_shikimate_kinase_HC_chr6:10838651-10833939_20140818
234.426	1.26685	4.13e-06	0.00051439	MSTRG.63173.12	3854	NB-ARC domain disease resistance protein [Medicago truncatula]/gi	Medtr3g466620.1_NB-ARC_domain_disease_resistance_protein_LC_chr3:27403732-27400482_20140818
499.233	1.26681	3.19e-07	6.61e-05	MSTRG.19178.1	1121	DSBA oxidoreductase family protein [Medicago truncatula]/gi	Medtr7g016650.2_DSBA_oxidoreductase_family_protein_HC_chr7:5267213-5271627_20140818
64.5257	1.26546	0.00168423	0.0414925	27810_t	879	enoyl-(acyl carrier) reductase [Medicago truncatula]/gi	Medtr3g086210.1_enoyl-(acyl_carrier)_reductase_HC_chr3:39005512-39008234_20140818
402.899	1.26492	0.000256038	0.0113234	MSTRG.68114.3	451	---NA---	Medtr6g034930.1_hypothetical_protein_LC_chr6:12218765-12220282_20140818
365.028	1.26441	0.000135261	0.00717143	MSTRG.89433.8	1896	F-box/RNI/FBD-like domain protein [Medicago truncatula]/gi	Medtr2g047848.1_F-box/RNI/FBD-like_domain_protein_LC_chr2:20923213-20924731_20140818
70.0646	1.26423	0.000676225	0.0224426	MSTRG.15789.4	1151	hypothetical protein TSUD_132920 [Trifolium subterraneum]	Medtr3g082370.1_papain_family_cysteine_protease_LC_chr3:37174517-37176618_20140818
50.6107	1.26199	0.00176061	0.0427452	MSTRG.41439.1	1263	plant/F12P19-7 protein [Medicago truncatula]/gi	Medtr3g064600.1_plant/F12P19-7_protein_HC_chr3:29111999-29116457_20140818
45.2933	1.26117	0.000821244	0.0254624	MSTRG.12670.2	2129	pumilio homolog 6 chloroplastic-like [Cajanus cajan]	Medtr2g036900.2_pumilio-family_RNA-binding_repeatprotein_HC_chr2:16007791-16000131_20140818
66.4612	1.26031	0.000387182	0.0152745	MSTRG.33401.4	1169	replication factor-A carboxy-terminal domain protein [Medicago truncatula]/gi	Medtr4g036240.2_replication_factor-A_carboxy-terminal_domain_protein_HC_chr4:11830642-11833873_20140818
100.914	1.26014	0.00170935	0.041868	MSTRG.57302.4	1452	nuclear division RFT1-like protein [Medicago truncatula]/gi	Medtr4g036550.1_nuclear_division_RFT1-like_protein_HC_chr4:13184308-13195590_20140818
1203.84	1.26002	4.67e-10	2.69e-07	MSTRG.27488.8	10484	hypothetical protein PHAVU_010G091100g [Phaseolus vulgaris]/gi	Medtr8g028500.1_Rpp4C1_HC_chr8:10848011-10860059_20140818
39.3191	1.25999	0.0014671	0.0377427	MSTRG.40382.3	1679	disease resistance protein (TIR-NBS-LRR class) [Medicago truncatula]/gi	Medtr4g014240.1_disease_resistance_protein_(TIR-NBS-LRR_class)_LC_chr4:3961105-3966518_20140818
112.194	1.25927	0.000155342	0.00790603	94878_t	7128	NBS-LRR type disease resistance protein [Medicago truncatula]/gi	Medtr3g021380.1_NBS-LRR_type_disease_resistance_protein_LC_chr3:6260285-6256594_20140818
511.321	1.25825	1.28e-06	0.000205998	MSTRG.30495.2	620	plant/F18B13-26 protein [Medicago truncatula]/gi	Medtr4g011060.1_plant/F18B13-26_protein_HC_chr4:2600967-2600575_20140818
108.216	1.25757	0.00133493	0.0353763	MSTRG.69396.1	1563	50S ribosomal protein L21 related protein [Medicago truncatula]/gi	Medtr7g111750.1_50S_ribosomal_protein_L21,_related_protein_HC_chr7:45898944-45894633_20140818
204.616	1.25656	1.46e-06	0.000228796	MSTRG.22721.2	5052	LRR and NB-ARC domain disease resistance protein [Medicago truncatula]/gi	Medtr3g023030.1_LRR_and_NB-ARC_domain_disease_resistance_protein_LC_chr3:6950546-6944739_20140818
82.2111	1.25642	0.00108684	0.0307534	142965_t	2016	DEAD-box ATP-dependent RNA helicase [Medicago truncatula]/gi	Medtr6g005320.1_DEAD-box_ATP-dependent_RNA_helicase_HC_chr6:708901-704351_20140818
160.268	1.2558	0.000449632	0.016874	MSTRG.23684.1	4430	disease resistance protein (TIR-NBS-LRR class) putative [Medicago truncatula]/gi	Medtr0012s0290.1_disease_resistance_protein_(TIR-NBS-LRR_class),_putative_LC_scaffold0012:214659-202913_20140818
309.147	1.25357	9.61e-06	0.000990206	151993_t	1104	plant/T7N9-9 protein [Medicago truncatula]/gi	Medtr5g038460.2_plant/T7N9-9_protein_HC_chr5:16901993-16892587_20140818
10674.6	1.25194	5.44e-05	0.00365609	MSTRG.84236.3	2931	galactinol-raffinose galactosyltransferase [Medicago truncatula]/gi	Medtr7g091880.1_galactinol-raffinose_galactosyltransferase_HC_chr7:36372945-36367215_20140818
1978.23	1.2519	3.23e-06	0.000425789	MSTRG.57636.1	1441	soluble N-ethylmaleimide-sensitive factor adaptor protein [Medicago truncatula]/gi	Medtr3g023720.1_soluble_N-ethylmaleimide-sensitive_factor_adaptor_protein_HC_chr3:7218102-7214079_20140818
161.724	1.25124	0.00134969	0.0355789	MSTRG.3185.8	1612	unknown [Medicago truncatula]	Medtr6g090515.1_charged_multivesicular_body_protein_HC_chr6:34403252-34407494_20140818
137.681	1.25124	0.000103993	0.00589061	69585_t	1023	NAC transcription factor-like protein [Medicago truncatula]/gi	Medtr7g085220.1_NAC_transcription_factor-like_protein_HC_chr7:32967009-32968969_20140818
200.265	1.25087	4.88e-05	0.00338451	MSTRG.14259.12	1483	polyadenylation and cleavage factor 11-like protein [Trifolium pratense]	Medtr6g011450.2_PCF11P-related_protein_HC_chr6:3248562-3252804_20140818
188.75	1.25035	5.47e-07	0.00010324	MSTRG.89339.7	1149	hypothetical protein L195_g031334 [Trifolium pratense]	Medtr3g006170.1_retinoblastoma-related_protein,_putative_HC_chr3:570880-569693_20140818
49.4358	1.25009	0.000892388	0.0269194	107733_t	1491	hypothetical protein TSUD_148660 [Trifolium subterraneum]	Medtr5g464720.1_hypothetical_protein_LC_chr5:26871754-26873204_20140818
1595.57	1.25004	9.73e-06	0.000997782	MSTRG.30491.2	1154	lactoylglutathione lyase/glyoxalase I family protein [Medicago truncatula]/gi	Medtr4g011020.1_lactoylglutathione_lyase/glyoxalase_I_family_protein_HC_chr4:2571660-2573651_20140818
1773.54	1.2497	1.47e-05	0.00138169	MSTRG.17483.1	572	---NA---	---NA---
103.755	1.2494	1.97e-07	4.57e-05	MSTRG.40325.1	5922	ribonuclease H partial [Trifolium pratense]	Medtr1g026690.1_hypothetical_protein_LC_chr1:8719475-8720704_20140818
137.985	1.24906	0.0016229	0.0404413	MSTRG.66680.6	1151	mediator of RNA polymerase II transcription subunit-like protein putative [Medicago truncatula]/gi	Medtr8g017180.1_mediator_of_RNA_polymerase_II_transcription_subunit-like_protein,_putative_HC_chr8:5777388-5772992_20140818
50.1236	1.24851	0.00167424	0.0413021	62527_t	519	hypothetical protein TSUD_350540 [Trifolium subterraneum]	Medtr8g027255.1_yippee_family_zinc-binding_protein,_putative_HC_chr8:9570424-9568141_20140818
49.1622	1.24793	0.0022034	0.0495314	134075_t	1092	plant/F12P19-7 protein [Medicago truncatula]/gi	Medtr3g064600.1_plant/F12P19-7_protein_HC_chr3:29111999-29116457_20140818
81.9968	1.24783	4.1e-05	0.00298123	MSTRG.25338.5	704	branched chain alpha-keto acid dehydrogenase E1 beta subunit [Medicago truncatula]/gi	Medtr4g021470.1_branched_chain_alpha-keto_acid_dehydrogenase_E1_beta_subunit_HC_chr4:6990880-6984927_20140818
82.2788	1.24614	0.000805195	0.0251063	MSTRG.29285.1	277	cytochrome P450 family 71 protein [Medicago truncatula]/gi	Medtr1g023700.1_cytochrome_P450_family_71_protein_HC_chr1:7624049-7622290_20140818
12860.8	1.24557	3.06e-06	0.000407907	MSTRG.43621.1	903	transmembrane protein putative [Medicago truncatula]/gi	Medtr7g068350.1_transmembrane_protein,_putative_LC_chr7:25002434-25001592_20140818
96.1947	1.24514	0.000146336	0.00753679	MSTRG.82241.3	1221	tRNA (guanine-N(1))-methyltransferase putative [Medicago truncatula]/gi	Medtr1g024920.1_tRNA_(guanine-N(1))-methyltransferase,_putative_HC_chr1:7942696-7935263_20140818
197.659	1.24435	0.00097255	0.0285954	MSTRG.13365.7	858	replication protein A 70 kDa DNA-binding subunit [Trifolium pratense]	Medtr1g105785.1_replication_factor-A_carboxy-terminal_domain_protein_HC_chr1:47732917-47735741_20140818
124.057	1.24375	0.00191977	0.0452115	80980_t	3801	LRR receptor-like kinase plant-like protein [Medicago truncatula]/gi	Medtr8g015150.4_LRR_receptor-like_kinase_plant-like_protein_LC_chr8:4891674-4885886_20140818
53.7355	1.24214	0.00122867	0.033459	MSTRG.4521.2	1010	E3 ubiquitin-protein ligase PUB22-like protein [Medicago truncatula]/gi	Medtr2g087350.1_E3_ubiquitin-protein_ligase_PUB22-like_protein_HC_chr2:36745018-36743285_20140818
148.392	1.24206	0.000129799	0.00695561	MSTRG.83440.3	1013	transmembrane protein [Medicago truncatula]/gi	Medtr7g066800.1_transmembrane_protein_HC_chr7:24362572-24365623_20140818
368.648	1.24172	7.11e-05	0.00445604	MSTRG.13365.5	1997	hypothetical protein TSUD_320930 [Trifolium subterraneum]	Medtr1g105785.1_replication_factor-A_carboxy-terminal_domain_protein_HC_chr1:47732917-47735741_20140818
85.7517	1.2414	0.00221376	0.0496611	MSTRG.79559.4	569	ankyrin repeat plant-like protein [Medicago truncatula]/gi	Medtr0470s0020.1_ankyrin_repeat_plant-like_protein_LC_scaffold0470:10687-11436_20140818
92.8674	1.24002	0.000796835	0.024959	MSTRG.79559.3	663	ankyrin repeat plant-like protein [Medicago truncatula]/gi	Medtr0470s0020.1_ankyrin_repeat_plant-like_protein_LC_scaffold0470:10687-11436_20140818
258.955	1.23957	1.17e-05	0.00115168	MSTRG.66996.3	3555	disease resistance protein (TIR-NBS-LRR class) putative [Medicago truncatula]/gi	Medtr6g088250.1_disease_resistance_protein_(TIR-NBS-LRR_class),_putative_LC_chr6:33403560-33394883_20140818
269.62	1.23869	1.02e-05	0.00103614	MSTRG.66996.1	3629	disease resistance protein (TIR-NBS-LRR class) [Medicago truncatula]/gi	Medtr2g039770.1_disease_resistance_protein_(TIR-NBS-LRR_class)_LC_chr2:17437701-17443829_20140818
337.21	1.23802	0.00177388	0.0429798	MSTRG.41565.9	1563	2OG-Fe(II) oxygenase family oxidoreductase [Medicago truncatula]/gi	Medtr7g063730.1_2OG-Fe(II)_oxygenase_family_oxidoreductase_HC_chr7:23276759-23278907_20140818
80.4774	1.23694	1.45e-05	0.00136909	21192_t	2214	NBS-LRR type disease resistance protein [Medicago truncatula]/gi	Medtr3g012050.1_NBS-LRR_type_disease_resistance_protein_HC_chr3:3199029-3195523_20140818
427.319	1.23588	7.92e-05	0.00483036	65978_t	1191	cytochrome P450 family monooxygenase [Medicago truncatula]/gi	Medtr8g076290.1_cytochrome_P450_family_monooxygenase_HC_chr8:32316653-32312590_20140818
1280.72	1.23579	1.08e-09	5.5e-07	MSTRG.27488.9	10548	hypothetical protein PHAVU_010G091100g [Phaseolus vulgaris]/gi	Medtr8g028500.1_Rpp4C1_HC_chr8:10848011-10860059_20140818
16109.7	1.23568	3.99e-06	0.000500656	MSTRG.21065.2	1070	transmembrane protein putative [Medicago truncatula]/gi	Medtr7g068350.1_transmembrane_protein,_putative_LC_chr7:25002434-25001592_20140818
74.8039	1.23511	0.00166471	0.0412102	MSTRG.69332.7	1536	microtubule associated protein MAP65/ASE1 family protein [Medicago truncatula]/gi	Medtr5g093860.1_microtubule_associated_protein,_MAP65/ASE1_family_protein_HC_chr5:40981176-40985866_20140818
12600.3	1.23509	3.26e-06	0.00042936	MSTRG.43621.2	832	transmembrane protein putative [Medicago truncatula]/gi	Medtr7g068350.1_transmembrane_protein,_putative_LC_chr7:25002434-25001592_20140818
327.237	1.23394	3.16e-05	0.00247239	MSTRG.49772.7	3559	2-isopropylmalate synthase [Medicago truncatula]/gi	Medtr2g078470.1_2-isopropylmalate_synthase_LC_chr2:32716400-32717524_20140818
758.085	1.23363	9.68e-08	2.59e-05	MSTRG.30495.3	745	plant/F18B13-26 protein [Medicago truncatula]/gi	Medtr4g011060.1_plant/F18B13-26_protein_HC_chr4:2600967-2600575_20140818
104.166	1.23329	1.58e-06	0.00024498	MSTRG.28547.3	1953	disease resistance protein (TIR-NBS-LRR class) putative [Medicago truncatula]/gi	Medtr6g472230.1_disease_resistance_protein_(TIR-NBS-LRR_class),_putative_LC_chr6:26054240-26059623_20140818
196.455	1.23322	1.17e-05	0.00115168	MSTRG.45021.4	783	---NA---	---NA---
88.7196	1.23085	0.000990563	0.0289002	MSTRG.40860.1	1015	structural constituent of ribosome protein putative [Medicago truncatula]/gi	Medtr2g021040.2_structural_constituent_of_ribosome_protein,_putative_HC_chr2:7107810-7113276_20140818
72.6958	1.23031	0.000270888	0.0118182	MSTRG.7020.1	1326	unknown [Medicago truncatula]	Medtr4g115690.1_hypothetical_protein_HC_chr4:47810138-47811531_20140818
178.332	1.23011	0.00118841	0.032754	MSTRG.649.1	1951	2OG-Fe(II) oxygenase family oxidoreductase [Medicago truncatula]/gi	Medtr8g041600.1_2OG-Fe(II)_oxygenase_family_oxidoreductase_HC_chr8:15682611-15680295_20140818
113.563	1.22919	9.63e-07	0.00016388	MSTRG.27799.4	1190	---NA---	---NA---
80.6311	1.22894	0.000558554	0.0195819	MSTRG.20674.1	2283	rRNA-processing EBP2-like protein [Medicago truncatula]/gi	Medtr5g028350.1_rRNA-processing_EBP2-like_protein_HC_chr5:11866124-11863546_20140818
149.492	1.22706	4.42e-05	0.00315579	MSTRG.38444.4	1764	hypothetical protein MTR_0232s0030 [Medicago truncatula]/gi	Medtr0232s0030.1_hypothetical_protein_HC_scaffold0232:12112-14908_20140818
389.687	1.22682	8.12e-05	0.00490119	MSTRG.89433.1	1901	F-box/RNI/FBD-like domain protein [Medicago truncatula]/gi	Medtr2g047848.1_F-box/RNI/FBD-like_domain_protein_LC_chr2:20923213-20924731_20140818
49.0204	1.22681	0.000982161	0.0287525	MSTRG.25788.3	433	---NA---	---NA---
233.528	1.22535	2.63e-05	0.00214852	MSTRG.14259.14	1175	polyadenylation and cleavage factor 11-like protein [Trifolium pratense]	Medtr6g011450.2_PCF11P-related_protein_HC_chr6:3248562-3252804_20140818
126.53	1.22517	7.01e-05	0.00441116	MSTRG.1965.2	2218	disease resistance protein (CC-NBS-LRR class) family protein [Medicago truncatula]/gi	Medtr2g072110.2_disease_resistance_protein_(CC-NBS-LRR_class)_family_protein_LC_chr2:30246991-30255319_20140818
92.4311	1.22296	2.38e-05	0.00199424	46856_t	639	hypothetical protein CUMW_119310 [Citrus unshiu]	Medtr2g105410.1_DNA_repair_protein_RAD23-1,_putative_HC_chr2:45450877-45445798_20140818
200.14	1.22155	0.000120606	0.00659998	MSTRG.5379.1	292	FAD-binding berberine family protein [Medicago truncatula]/gi	Medtr2g031590.1_FAD-binding_berberine_family_protein_HC_chr2:11933055-11934989_20140818
1283.42	1.22087	1.39e-09	6.73e-07	MSTRG.27488.7	10433	hypothetical protein PHAVU_010G091100g [Phaseolus vulgaris]/gi	Medtr8g028500.1_Rpp4C1_HC_chr8:10848011-10860059_20140818
2274.87	1.21957	0.00205066	0.0471984	MSTRG.58896.25	760	keratin-associated protein 10-6-like [Oryzias latipes]	---NA---
56.3074	1.21934	0.00132843	0.0352862	MSTRG.37014.1	711	hypothetical protein CRG98_030674 [Punica granatum]	Medtr1g102630.1_eukaryotic_translation_initiation_factor_2c_HC_chr1:46371325-46378403_20140818
55.4938	1.2175	0.00158788	0.0397731	MSTRG.69075.2	1234	BZIP family transcription factor [Medicago truncatula]/gi	Medtr5g060950.1_BZIP_family_transcription_factor_HC_chr5:25357130-25354838_20140818
155.86	1.21489	3.19e-06	0.000421719	MSTRG.65281.1	1356	F-box/RNI/FBD-like domain protein [Medicago truncatula]/gi	Medtr7g034090.1_F-box/RNI/FBD-like_domain_protein_HC_chr7:12634735-12638236_20140818
261.675	1.21357	4.57e-05	0.00322764	MSTRG.77106.1	4748	cyclin-dependent kinase [Medicago truncatula]/gi	Medtr3g085650.3_cyclin-dependent_kinase_HC_chr3:38740892-38735048_20140818
355.935	1.2133	0.00153867	0.0388992	MSTRG.68114.5	449	---NA---	Medtr6g034930.1_hypothetical_protein_LC_chr6:12218765-12220282_20140818
215.261	1.21294	7.17e-06	0.000785112	MSTRG.17648.2	807	glycoside hydrolase family 1 protein [Medicago truncatula]/gi	Medtr6g078330.3_glycoside_hydrolase_family_1_protein_HC_chr6:29404322-29408792_20140818
185.864	1.21273	0.00130191	0.0347749	MSTRG.53344.1	670	unknown [Medicago truncatula]	Medtr7g090035.1_cysteine-rich_TM_module_stress_tolerance_protein_HC_chr7:35326889-35327603_20140818
160.349	1.21266	2.94e-05	0.00234235	171840_t	3315	NB-ARC domain disease resistance protein [Medicago truncatula]/gi	Medtr5g035280.1_NB-ARC_domain_disease_resistance_protein_LC_chr5:15348602-15344286_20140818
61.4994	1.21197	0.0013261	0.0352551	MSTRG.51254.2	1588	cysteine-rich receptor-kinase-like protein [Medicago truncatula]/gi	Medtr1g105655.1_cysteine-rich_receptor-kinase-like_protein_HC_chr1:47638290-47641699_20140818
297.603	1.21107	5.17e-05	0.00352864	MSTRG.9276.1	1145	esterase/lipase/thioesterase family protein [Medicago truncatula]/gi	Medtr2g039480.1_esterase/lipase/thioesterase_family_protein_HC_chr2:17302990-17297098_20140818
142.924	1.21065	3.87e-05	0.00286681	MSTRG.20971.2	1046	outer envelope protein [Medicago truncatula]/gi	Medtr4g050120.1_outer_envelope_protein_HC_chr4:17713880-17721218_20140818
275.256	1.20939	6.1e-05	0.00397116	MSTRG.14259.11	2167	polyadenylation and cleavage factor 11-like protein [Trifolium pratense]	Medtr6g011450.2_PCF11P-related_protein_HC_chr6:3248562-3252804_20140818
780.686	1.20922	2.47e-06	0.000344624	MSTRG.13357.1	921	PREDICTED: metallothiol transferase FosB [Ricinus communis]/gi	Medtr2g103490.1_lactoylglutathione_lyase/glyoxalase_I_family_protein_HC_chr2:44556161-44555344_20140818
181.412	1.20886	0.00101402	0.0293852	MSTRG.7049.1	2607	replication factor-A carboxy-terminal domain protein [Medicago truncatula]/gi	Medtr7g110100.1_replication_factor-A_carboxy-terminal_domain_protein_HC_chr7:45127464-45130150_20140818
86.6913	1.20826	0.000238623	0.0107824	MSTRG.79582.1	1494	hypothetical protein L195_g032294 [Trifolium pratense]	Medtr6g012560.1_transmembrane_protein,_putative_LC_chr6:3837962-3835555_20140818
50.5427	1.20727	0.00209746	0.0479196	MSTRG.5880.1	490	unknown [Medicago truncatula]	Medtr5g072840.1_UDP-glucosyltransferase_family_protein_HC_chr5:31001473-31003345_20140818
262.366	1.20706	4.21e-05	0.00304839	MSTRG.77563.28	4864	LRR and NB-ARC domain disease resistance protein [Medicago truncatula]/gi	Medtr0425s0020.1_LRR_and_NB-ARC_domain_disease_resistance_protein_LC_scaffold0425:6387-10157_20140818
235.934	1.20616	3.89e-05	0.00287739	MSTRG.63173.10	1904	NB-ARC domain disease resistance protein [Medicago truncatula]/gi	Medtr3g466620.1_NB-ARC_domain_disease_resistance_protein_LC_chr3:27403732-27400482_20140818
102.523	1.20598	2.36e-05	0.00197619	MSTRG.85233.1	1099	---NA---	---NA---
252.347	1.20217	1.75e-07	4.21e-05	MSTRG.45021.2	886	---NA---	---NA---
435.516	1.20115	0.000754562	0.0240878	45486_t	459	unknown [Medicago truncatula]/gi	Medtr8g045570.1_pathogenesis-related_protein_bet_V_I_family_protein_HC_chr8:17825808-17821846_20140818
324.993	1.20076	0.000303145	0.0128037	150233_t	654	Kunitz type trypsin inhibitor / Alpha-fucosidase [Medicago truncatula]/gi	Medtr6g059730.1_Kunitz_type_trypsin_inhibitor_/_Alpha-fucosidase_HC_chr6:20493190-20494222_20140818
102.507	1.20072	0.000992414	0.028922	MSTRG.17309.1	1466	E3 ubiquitin-protein ligase UPL6 [Medicago truncatula]/gi	Medtr2g033040.1_E3_ubiquitin-protein_ligase_UPL6_HC_chr2:12491348-12468569_20140818
156.182	1.19941	0.00058889	0.0203688	MSTRG.67184.1	3164	NYN domain protein [Medicago truncatula]/gi	Medtr4g098990.1_NYN_domain_protein_HC_chr4:40918811-40913608_20140818
75.3836	1.19803	0.00124709	0.0338121	56520_t	984	MAP kinase kinase [Medicago truncatula]/gi	Medtr6g090470.1_MAP_kinase_kinase_HC_chr6:34058518-34052726_20140818
273.308	1.19723	2.13e-11	1.85e-08	MSTRG.36532.5	3231	amino-terminal domain micro-spherule protein [Medicago truncatula]/gi	Medtr8g076470.2_amino-terminal_domain_micro-spherule_protein_HC_chr8:32390577-32386485_20140818
342.497	1.19721	2.95e-06	0.000396771	MSTRG.76146.1	428	---NA---	---NA---
134.181	1.19568	0.000120415	0.00659185	188788_t	1311	NAC transcription factor-like protein [Medicago truncatula]/gi	Medtr7g085220.1_NAC_transcription_factor-like_protein_HC_chr7:32967009-32968969_20140818
261.905	1.19535	0.000795186	0.0249225	MSTRG.34377.1	2136	MACPF domain protein [Medicago truncatula]/gi	Medtr8g095110.1_MACPF_domain_protein_HC_chr8:39775166-39778281_20140818
92.64	1.19381	0.000166587	0.00830907	182593_t	1080	F-box SKIP23-like protein [Medicago truncatula]/gi	Medtr6g018390.1_F-box_SKIP23-like_protein_LC_chr6:7043347-7040650_20140818
92.3634	1.19313	9.35e-05	0.0054306	MSTRG.44307.2	2022	cyanogenic beta-glucosidase putative [Medicago truncatula]/gi	Medtr4g066210.1_cyanogenic_beta-glucosidase,_putative_HC_chr4:24988288-24984112_20140818
109.936	1.19212	0.00029934	0.0126775	MSTRG.37707.2	1375	MAP kinase kinase [Medicago truncatula]/gi	Medtr6g090470.1_MAP_kinase_kinase_HC_chr6:34058518-34052726_20140818
336.974	1.192	2.17e-05	0.00185548	MSTRG.48737.4	877	transmembrane protein putative [Medicago truncatula]/gi	Medtr4g098700.1_transmembrane_protein,_putative_LC_chr4:40695499-40694571_20140818
1109.2	1.1919	7.27e-05	0.00453455	MSTRG.85095.1	1051	unknown [Medicago truncatula]/gi	Medtr7g094520.1_short-chain_dehydrogenase/reductase_HC_chr7:37629739-37628446_20140818
79.4688	1.19159	0.000665419	0.0221919	MSTRG.32816.6	1232	hypersensitive-induced response protein [Trifolium pratense]	Medtr4g107810.1_SPFH/band_7/PHB_domain_membrane-associated_family_protein_HC_chr4:44681842-44683641_20140818
500.845	1.19154	5.31e-05	0.00360061	MSTRG.54504.1	1531	cytochrome P450 family monooxygenase [Medicago truncatula]/gi	Medtr8g076290.1_cytochrome_P450_family_monooxygenase_HC_chr8:32316653-32312590_20140818
55.4814	1.19076	0.00162696	0.0405293	MSTRG.84040.2	1168	glycosyltransferase family 90 protein [Medicago truncatula]/gi	Medtr7g076860.1_glycosyltransferase_family_90_protein_HC_chr7:29017189-29019886_20140818
77.0436	1.19043	0.000202578	0.00960922	57413_t	849	unknown [Medicago truncatula]/gi	Medtr5g041930.1_YGL010w-like_protein_HC_chr5:18420916-18425317_20140818
60.6604	1.18898	0.000135567	0.00718416	MSTRG.25338.4	736	branched chain alpha-keto acid dehydrogenase E1 beta subunit [Medicago truncatula]/gi	Medtr4g021470.1_branched_chain_alpha-keto_acid_dehydrogenase_E1_beta_subunit_HC_chr4:6990880-6984927_20140818
54.0769	1.18802	0.00103666	0.0298295	MSTRG.18378.1	691	---NA---	---NA---
287.153	1.18795	3.21e-06	0.000423503	123068_t	1461	lysine ketoglutarate reductase trans-splicing protein [Medicago truncatula]/gi	Medtr3g086610.1_lysine_ketoglutarate_reductase_trans-splicing_protein_HC_chr3:39259919-39264384_20140818
81.1313	1.18777	3.67e-05	0.00276319	MSTRG.75500.1	916	hypothetical protein TSUD_350540 [Trifolium subterraneum]	Medtr8g027255.1_yippee_family_zinc-binding_protein,_putative_HC_chr8:9570424-9568141_20140818
439.271	1.18731	0.000913316	0.027331	34374_t	459	unknown [Medicago truncatula]/gi	Medtr8g045570.1_pathogenesis-related_protein_bet_V_I_family_protein_HC_chr8:17825808-17821846_20140818
92.2274	1.18729	0.000180138	0.00880085	117082_t	1080	F-box SKIP23-like protein [Medicago truncatula]/gi	Medtr6g018390.1_F-box_SKIP23-like_protein_LC_chr6:7043347-7040650_20140818
138.134	1.18722	0.000151373	0.00773707	MSTRG.65281.2	1977	hypothetical protein TSUD_173620 [Trifolium subterraneum]	Medtr7g034090.1_F-box/RNI/FBD-like_domain_protein_HC_chr7:12634735-12638236_20140818
214.849	1.18565	1.53e-06	0.000238078	MSTRG.9879.2	2952	DNA repair helicase XPB1 [Medicago truncatula]/gi	Medtr8g098675.1_DNA_repair_helicase_XPB1_HC_chr8:41191751-41200265_20140818
120.148	1.18314	0.000743486	0.0238572	MSTRG.84813.5	1352	hypothetical protein PHAVU_005G034400g [Phaseolus vulgaris]/gi	Medtr4g073100.1_BZIP_transcription_factor_HC_chr4:27650440-27647459_20140818
50.8252	1.18257	0.000801259	0.025047	MSTRG.81571.5	1620	ribonuclease P [Medicago truncatula]/gi	Medtr4g008840.1_ribonuclease_P_HC_chr4:1706291-1713206_20140818
2695.36	1.18223	0.000432462	0.0164372	MSTRG.64982.12	797	hypothetical protein TSUD_89390 [Trifolium subterraneum]	Medtr4g068860.1_Non-symbiotic_hemoglobin_HC_chr4:25846162-25844617_20140818
101.608	1.17997	1.75e-05	0.00157671	MSTRG.85366.1	279	hypothetical protein MTR_5g089380 [Medicago truncatula]/gi	Medtr5g089380.1_hypothetical_protein_LC_chr5:38848771-38849072_20140818
88.1547	1.17878	0.00077622	0.0245466	MSTRG.15789.7	1408	hypothetical protein TSUD_132920 [Trifolium subterraneum]	Medtr3g082370.1_papain_family_cysteine_protease_LC_chr3:37174517-37176618_20140818
100.327	1.1787	0.000183728	0.00891579	180236_t	5871	LRR receptor-like kinase [Medicago truncatula]/gi	Medtr5g019070.1_LRR_receptor-like_kinase_LC_chr5:7190704-7193875_20140818
54.9397	1.17842	0.000296471	0.0126184	MSTRG.42970.2	2049	NBS-LRR type disease resistance protein [Medicago truncatula]/gi	Medtr1g031830.1_NBS-LRR_type_disease_resistance_protein_HC_chr1:11174052-11181772_20140818
159.259	1.17783	0.000447927	0.0168296	MSTRG.17377.32	2560	S-locus lectin kinase family protein [Medicago truncatula]/gi	Medtr3g007630.1_S-locus_lectin_kinase_family_protein_LC_chr3:1086871-1094084_20140818
202.4	1.17769	0.000319975	0.0133184	MSTRG.46807.1	3894	disease resistance protein (TIR-NBS-LRR class) [Medicago truncatula]/gi	Medtr2g039770.1_disease_resistance_protein_(TIR-NBS-LRR_class)_LC_chr2:17437701-17443829_20140818
254.394	1.17614	4.67e-07	9.04e-05	MSTRG.6829.1	2610	hypothetical protein MTR_2g048920 [Medicago truncatula]/gi	Medtr2g048920.1_hypothetical_protein_LC_chr2:21607580-21609740_20140818
354.988	1.17594	5.6e-05	0.00373396	MSTRG.49772.6	3713	2-isopropylmalate synthase [Medicago truncatula]/gi	Medtr2g078470.1_2-isopropylmalate_synthase_LC_chr2:32716400-32717524_20140818
258.037	1.1754	0.00173273	0.0422272	MSTRG.59343.18	1568	PREDICTED: NAD(P)H-dependent 6'-deoxychalcone synthase-like [Cicer arietinum]	Medtr3g083130.1_aldo/keto_reductase_family_oxidoreductase_HC_chr3:37505830-37503715_20140818
1682.57	1.17522	1.14e-06	0.000188465	MSTRG.48352.1	1060	aluminum induced protein with YGL and LRDR motif protein [Medicago truncatula]/gi	Medtr2g022520.1_aluminum_induced_protein_with_YGL_and_LRDR_motif_protein_HC_chr2:7790362-7796721_20140818
292.331	1.17503	1.58e-06	0.00024498	MSTRG.17648.1	909	glycoside hydrolase family 1 protein [Medicago truncatula]/gi	Medtr6g078330.3_glycoside_hydrolase_family_1_protein_HC_chr6:29404322-29408792_20140818
379.849	1.17308	0.00189398	0.0448036	170145_t	1035	glycoside hydrolase family 18 protein [Trifolium pratense]	Medtr3g110280.1_glycoside_hydrolase_family_18_protein_HC_chr3:51468490-51467344_20140818
177.632	1.17179	6.36e-08	1.83e-05	MSTRG.89339.3	1692	hypothetical protein L195_g031334 [Trifolium pratense]	Medtr3g006170.1_retinoblastoma-related_protein,_putative_HC_chr3:570880-569693_20140818
94.8998	1.1696	0.00169734	0.0416964	MSTRG.60444.1	1329	secondary cell wall glycosyltransferase family 47 protein [Medicago truncatula]/gi	Medtr7g087100.1_secondary_cell_wall_glycosyltransferase_family_47_protein_HC_chr7:33902540-33905576_20140818
65.2178	1.16907	0.00157996	0.0396325	61791_t	1404	P-loop nucleoside triphosphate hydrolase superfamily protein [Medicago truncatula]/gi	Medtr1g022250.1_P-loop_nucleoside_triphosphate_hydrolase_superfamily_protein_HC_chr1:6970364-6972206_20140818
326.713	1.1689	4.24e-05	0.00306278	MSTRG.52451.3	2433	probable splicing factor 3A subunit 1 [Prunus persica]/gi	Medtr8g106170.1_SWAP_(suppressor-of-white-APricot)/surp_domain_protein_HC_chr8:44842026-44847356_20140818
1957.42	1.16868	0.000238523	0.0107824	MSTRG.58895.11	728	hypothetical protein KK1_048371 [Cajanus cajan]	---NA---
128.702	1.16861	0.000243138	0.0109241	MSTRG.23361.1	391	hypothetical protein MTR_4g061500 [Medicago truncatula]/gi	Medtr4g061500.1_hypothetical_protein_LC_chr4:22749506-22749005_20140818
107.228	1.16802	0.000730521	0.0236222	27850_t	3492	LRR and NB-ARC domain disease resistance protein [Medicago truncatula]/gi	Medtr3g023030.1_LRR_and_NB-ARC_domain_disease_resistance_protein_LC_chr3:6950546-6944739_20140818
231.443	1.16778	0.00143046	0.0371019	MSTRG.3185.1	2127	unknown [Medicago truncatula]	Medtr6g090515.1_charged_multivesicular_body_protein_HC_chr6:34403252-34407494_20140818
55.9188	1.16762	0.000424129	0.01626	MSTRG.85765.1	877	unknown [Medicago truncatula]	Medtr6g011380.1_SPFH/band_7/PHB_domain_membrane-associated_family_protein_HC_chr6:3201162-3205637_20140818
193.854	1.16758	0.00141114	0.036767	MSTRG.79113.7	1822	E3 ubiquitin protein ligase RIN2 [Medicago truncatula]/gi	Medtr3g007760.1_E3_ubiquitin_protein_ligase_RIN2_HC_chr3:1166460-1173444_20140818
212.436	1.16731	1.15e-08	4.22e-06	MSTRG.44166.3	1174	unknown [Medicago truncatula]/gi	Medtr7g085450.1_PHD_finger-like_protein_HC_chr7:33106030-33108687_20140818
232.323	1.16729	0.000262087	0.0115023	119670_t	1521	protein disulfide isomerase (PDI)-like protein [Medicago truncatula]/gi	Medtr8g064840.1_protein_disulfide_isomerase_(PDI)-like_protein_HC_chr8:27209650-27211771_20140818
142.979	1.16635	0.000280086	0.0121002	MSTRG.69332.5	1477	microtubule associated protein MAP65/ASE1 family protein [Medicago truncatula]/gi	Medtr5g093860.1_microtubule_associated_protein,_MAP65/ASE1_family_protein_HC_chr5:40981176-40985866_20140818
272.778	1.16577	9.5e-05	0.00549993	MSTRG.75571.5	1276	galactinol synthase [Medicago sativa]	Medtr1g084670.1_galactinol_synthase_HC_chr1:37697306-37699163_20140818
170.747	1.16498	3.18e-07	6.61e-05	MSTRG.72118.12	1488	glycosyltransferase family 90 protein [Medicago truncatula]/gi	Medtr8g031470.1_glycosyltransferase_family_90_protein_HC_chr8:11807748-11811706_20140818
303.628	1.16461	1.01e-07	2.69e-05	MSTRG.84055.2	4130	hypothetical protein L195_g016313 [Trifolium pratense]	Medtr1g076490.1_hypothetical_protein_LC_chr1:34081835-34080279_20140818
159.652	1.16446	0.000243345	0.0109274	MSTRG.45052.2	1422	L-allo-threonine aldolase-like protein [Medicago truncatula]/gi	Medtr1g080250.2_L-allo-threonine_aldolase-like_protein_HC_chr1:35635505-35627093_20140818
257.691	1.16282	8.82e-09	3.33e-06	MSTRG.39415.2	2414	cysteine-rich receptor-like kinase [Medicago truncatula]/gi	Medtr8g041880.1_cysteine-rich_receptor-like_kinase_HC_chr8:15802331-15798924_20140818
111.496	1.16013	0.00151134	0.038469	160006_t	1671	GRAS family transcription factor [Medicago truncatula]/gi	Medtr7g109580.1_GRAS_family_transcription_factor_HC_chr7:44838783-44836902_20140818
118.315	1.15949	0.000641387	0.0216495	MSTRG.12641.2	765	---NA---	---NA---
179.133	1.15907	3.21e-05	0.00250145	MSTRG.12882.2	567	40S ribosomal protein S6-2 partial [Glycine soja]	Medtr7g053160.1_40S_ribosomal_protein_S6-2_HC_chr7:18698849-18702010_20140818
146.143	1.15763	0.000459216	0.0171141	MSTRG.38657.1	1546	F-box protein interaction domain protein [Medicago truncatula]/gi	Medtr2g033410.1_F-box_protein_interaction_domain_protein_HC_chr2:12699392-12701048_20140818
83.9352	1.15692	0.000705363	0.0230833	MSTRG.17309.3	1275	E3 ubiquitin-protein ligase UPL6 [Medicago truncatula]/gi	Medtr2g033040.1_E3_ubiquitin-protein_ligase_UPL6_HC_chr2:12491348-12468569_20140818
3129.96	1.15667	4.58e-10	2.67e-07	MSTRG.22720.1	1199	unknown [Medicago truncatula]/gi	Medtr3g023110.1_EARLY_responsive_TO_dehydration_protein,_putative_HC_chr3:6977413-6980864_20140818
177.466	1.15584	0.000600263	0.0206378	MSTRG.70051.4	1697	histone deacetylase family protein [Medicago truncatula]/gi	Medtr4g055080.2_histone_deacetylase_family_protein_HC_chr4:20028709-20022768_20140818
98.6468	1.15542	0.00192787	0.0453325	MSTRG.82971.1	916	substrate carrier family protein [Medicago truncatula]/gi	Medtr6g092160.2_substrate_carrier_family_protein_HC_chr6:34737917-34740612_20140818
928.807	1.15311	8.33e-08	2.28e-05	MSTRG.30495.1	694	plant/F18B13-26 protein [Medicago truncatula]/gi	Medtr4g011060.1_plant/F18B13-26_protein_HC_chr4:2600967-2600575_20140818
67.7312	1.1528	0.00142468	0.0370141	177579_t	1806	DUF674 family protein [Medicago truncatula]/gi	Medtr7g066340.1_DUF674_family_protein_LC_chr7:24146371-24144089_20140818
1381.48	1.15145	4.48e-09	1.86e-06	MSTRG.27488.11	10621	hypothetical protein PHAVU_010G091100g [Phaseolus vulgaris]/gi	Medtr8g028500.1_Rpp4C1_HC_chr8:10848011-10860059_20140818
402.979	1.15119	5.33e-06	0.000630698	MSTRG.1057.1	788	ATP-dependent Clp protease adaptor protein ClpS [Medicago truncatula]/gi	Medtr5g054770.1_ATP-dependent_Clp_protease_adaptor_protein_ClpS_HC_chr5:22566023-22570033_20140818
144.2	1.15029	0.000969365	0.0285413	MSTRG.58380.7	1983	hypothetical protein MTR_1g492690 [Medicago truncatula]/gi	Medtr1g492690.1_hypothetical_protein_HC_chr1:41541171-41539306_20140818
385.091	1.14907	1.86e-07	4.38e-05	MSTRG.32696.1	261	unknown [Medicago truncatula]/gi	Medtr7g065130.1_hypothetical_protein_HC_chr7:23733151-23734236_20140818
2787.18	1.14898	0.000462177	0.0171914	MSTRG.64982.7	864	AF172172_1non-symbiotic hemoglobin [Medicago sativa]/gi	Medtr4g068860.1_Non-symbiotic_hemoglobin_HC_chr4:25846162-25844617_20140818
212.92	1.14874	6.76e-07	0.00012123	MSTRG.81974.12	1662	E3 ubiquitin-protein ligase BRE1-like protein [Medicago truncatula]/gi	Medtr7g046250.1_E3_ubiquitin-protein_ligase_BRE1-like_protein_HC_chr7:16333806-16352752_20140818
73.9002	1.14867	0.000756663	0.0241052	MSTRG.39394.1	665	plant/F3O9-12 protein [Medicago truncatula]/gi	Medtr8g046460.1_plant/F3O9-12_protein_HC_chr8:18640978-18639241_20140818
93.0942	1.14789	0.00104891	0.0300758	MSTRG.77335.1	904	subtilisin inhibitor 1 [Medicago truncatula]/gi	Medtr3g020800.1_subtilisin_inhibitor_1_HC_chr3:6034245-6035685_20140818
116.154	1.14779	1.9e-05	0.00167784	104545_t	516	unknown [Glycine max]/gi	---NA---
285.892	1.14675	9.18e-05	0.00536079	109664_t	1704	probable splicing factor 3A subunit 1 [Prunus persica]/gi	Medtr8g106170.1_SWAP_(suppressor-of-white-APricot)/surp_domain_protein_HC_chr8:44842026-44847356_20140818
137.749	1.14363	0.000405153	0.0157677	MSTRG.42879.2	333	PREDICTED: uncharacterized protein LOC101512970 [Cicer arietinum]	Medtr4g459450.1_zinc_finger,_C3HC4_type_family_protein,_putative_HC_chr4:21880077-21878022_20140818
198.105	1.14306	1.26e-05	0.00121612	MSTRG.86265.1	1197	E3 ubiquitin-protein ligase RMA1H1-like protein [Medicago truncatula]/gi	Medtr4g088875.1_E3_ubiquitin-protein_ligase_RMA1H1-like_protein_HC_chr4:35472873-35474936_20140818
243.527	1.14291	0.000509914	0.0183352	MSTRG.3185.7	2339	unknown [Medicago truncatula]	Medtr6g090515.1_charged_multivesicular_body_protein_HC_chr6:34403252-34407494_20140818
65.6013	1.14242	0.00197616	0.0460861	65005_t	2313	S-locus lectin kinase family protein [Medicago truncatula]/gi	Medtr3g007630.1_S-locus_lectin_kinase_family_protein_LC_chr3:1086871-1094084_20140818
173.942	1.14218	2.39e-06	0.000336972	MSTRG.78659.2	4340	disease resistance protein (TIR-NBS-LRR class) [Medicago truncatula]/gi	Medtr1g052170.1_disease_resistance_protein_(TIR-NBS-LRR_class)_HC_chr1:21057285-21062438_20140818
307.562	1.14215	5.3e-06	0.000627387	95019_t	885	wall-associated receptor kinase-like protein [Medicago truncatula]/gi	Medtr3g069050.1_wall-associated_receptor_kinase-like_protein_HC_chr3:30907066-30911410_20140818
258.832	1.14159	0.00035532	0.0144002	MSTRG.43380.13	1118	---NA---	---NA---
65.5734	1.14133	0.000484583	0.0177435	MSTRG.83519.1	2025	disease resistance protein rga3-like [Trifolium pratense]	Medtr3g026660.1_NB-ARC_domain_disease_resistance_protein_HC_chr3:8188700-8184619_20140818
403.242	1.14127	0.000233744	0.0106349	59040_t	1356	E3 ubiquitin-protein ligase RGLG2-like protein [Medicago truncatula]/gi	Medtr8g089670.1_E3_ubiquitin-protein_ligase_RGLG2-like_protein_HC_chr8:37321067-37317146_20140818
323.957	1.14074	0.000987048	0.0288357	MSTRG.25312.4	5001	disease resistance protein (TIR-NBS-LRR class) [Medicago truncatula]/gi	Medtr4g020700.1_disease_resistance_protein_(TIR-NBS-LRR_class)_LC_chr4:6645774-6655619_20140818
127.836	1.14048	0.000217661	0.0101062	MSTRG.84358.1	1824	peroxisomal membrane 22 kDa (Mpv17/PMP22) family protein [Medicago truncatula]/gi	Medtr2g080040.1_peroxisomal_membrane_22_kDa_(Mpv17/PMP22)_family_protein_HC_chr2:33779312-33775948_20140818
186.454	1.14034	0.000143816	0.0074566	MSTRG.83519.4	3833	NB-ARC domain disease resistance protein [Medicago truncatula]/gi	Medtr5g035280.1_NB-ARC_domain_disease_resistance_protein_LC_chr5:15348602-15344286_20140818
168.712	1.13768	0.000962095	0.0283958	MSTRG.82310.2	2899	S-locus lectin kinase family protein [Medicago truncatula]/gi	Medtr8g061110.1_S-locus_lectin_kinase_family_protein_HC_chr8:21182822-21179051_20140818
281.762	1.13547	6.7e-05	0.00427266	MSTRG.77106.2	4689	cyclin-dependent kinase [Medicago truncatula]/gi	Medtr3g085650.2_cyclin-dependent_kinase_HC_chr3:38740892-38735048_20140818
73.7391	1.13541	0.000214748	0.0100118	69022_t	633	hypothetical protein TSUD_350540 [Trifolium subterraneum]	Medtr8g027255.1_yippee_family_zinc-binding_protein,_putative_HC_chr8:9570424-9568141_20140818
102.534	1.13524	9.66e-06	0.000993415	MSTRG.31567.2	1698	RecQ family ATP-dependent DNA helicase [Medicago truncatula]/gi	Medtr2g042440.1_RecQ_family_ATP-dependent_DNA_helicase_HC_chr2:18525936-18516322_20140818
102.531	1.13505	9.18e-05	0.00536079	MSTRG.59410.13	320	PREDICTED: 11-oxo-beta-amyrin 30-oxidase-like [Cicer arietinum]	Medtr8g042040.1_cytochrome_P450_family_72_protein_HC_chr8:15862199-15858154_20140818
260.28	1.13494	0.00181585	0.0436606	59270_t	5127	disease resistance protein (TIR-NBS-LRR class) [Medicago truncatula]/gi	Medtr4g020700.2_disease_resistance_protein_(TIR-NBS-LRR_class)_LC_chr4:6645805-6656127_20140818
751.503	1.1341	9.71e-06	0.000996848	MSTRG.79330.2	2729	cobalamin-independent methionine synthase [Medicago truncatula]/gi	Medtr3g079640.1_cobalamin-independent_methionine_synthase_HC_chr3:35943580-35948815_20140818
50.5114	1.13369	0.00185629	0.0442363	118250_t	3348	lectin kinase family protein [Medicago truncatula]/gi	Medtr2g067980.1_lectin_kinase_family_protein_HC_chr2:28442220-28446111_20140818
123.909	1.13265	2.67e-06	0.000366717	MSTRG.25338.1	1518	branched chain alpha-keto acid dehydrogenase E1 beta subunit [Medicago truncatula]/gi	Medtr4g021470.1_branched_chain_alpha-keto_acid_dehydrogenase_E1_beta_subunit_HC_chr4:6990880-6984927_20140818
106.004	1.13236	0.000487219	0.0177988	MSTRG.51482.2	430	---NA---	---NA---
121.368	1.13212	6.56e-06	0.000737555	MSTRG.64083.1	2293	TPA: LysM receptor kinase 5 [Medicago truncatula]	Medtr5g086090.1_LysM_receptor_kinase_K1B_HC_chr5:37221079-37224624_20140818
3198.46	1.13184	6.61e-07	0.00011927	MSTRG.32696.5	616	unknown [Medicago truncatula]/gi	Medtr7g065130.1_hypothetical_protein_HC_chr7:23733151-23734236_20140818
187.863	1.13156	4.75e-05	0.00331908	MSTRG.83519.2	3992	NB-ARC domain disease resistance protein [Medicago truncatula]/gi	Medtr5g035280.1_NB-ARC_domain_disease_resistance_protein_LC_chr5:15348602-15344286_20140818
515.755	1.13037	1.17e-05	0.00114837	MSTRG.7574.2	246	---NA---	---NA---
73.4413	1.12954	0.000840797	0.0259065	MSTRG.83961.8	900	hypothetical protein TSUD_214670 [Trifolium subterraneum]	Medtr5g072820.1_UDP-glucosyltransferase_family_protein_HC_chr5:30989979-30993244_20140818
353.088	1.12917	0.00111774	0.0313881	MSTRG.25312.1	6033	disease resistance protein (TIR-NBS-LRR class) [Medicago truncatula]/gi	Medtr4g020700.1_disease_resistance_protein_(TIR-NBS-LRR_class)_LC_chr4:6645774-6655619_20140818
193.738	1.12779	1.67e-05	0.00151902	MSTRG.20971.3	1956	hypothetical protein GLYMA_12G096600 [Glycine max]	Medtr4g050120.1_outer_envelope_protein_HC_chr4:17713880-17721218_20140818
433.714	1.12749	8.5e-05	0.00507515	126228_t	4581	RNA-directed DNA polymerase [Dendrobium catenatum]	Medtr6g045307.1_IPP_transferase_LC_chr6:16235075-16228160_20140818
640.68	1.12735	0.000105141	0.00593611	MSTRG.320.1	1896	E3 ubiquitin-protein ligase RGLG2-like protein [Medicago truncatula]/gi	Medtr8g089670.1_E3_ubiquitin-protein_ligase_RGLG2-like_protein_HC_chr8:37321067-37317146_20140818
324.608	1.12726	0.00148334	0.0380662	MSTRG.25312.2	6000	PREDICTED: uncharacterized protein LOC101511908 isoform X1 [Cicer arietinum]	Medtr4g020700.1_disease_resistance_protein_(TIR-NBS-LRR_class)_LC_chr4:6645774-6655619_20140818
1299.76	1.12708	3.75e-05	0.00279433	MSTRG.6458.1	403	---NA---	---NA---
663.122	1.12563	1.53e-08	5.37e-06	63312_t	1467	unknown [Medicago truncatula]/gi	Medtr7g065290.1_glutathione_S-transferase,_amino-terminal_domain_protein_HC_chr7:23817913-23814968_20140818
144.705	1.12553	3.16e-05	0.00247347	92982_t	5514	serine/threonine-protein phosphatase 7 long form-like protein [Trifolium pratense]/gi	Medtr3g048910.1_LRR_receptor-like_kinase_family_protein_LC_chr3:18164347-18166716_20140818
229.568	1.12384	5.58e-06	0.000653484	MSTRG.40325.4	1759	transmembrane protein putative [Medicago truncatula]/gi	Medtr1g060590.1_calmodulin-binding_family_protein_HC_chr1:26377825-26373830_20140818
228.402	1.12364	0.00147123	0.03783	MSTRG.29170.4	702	---NA---	---NA---
185.727	1.12359	0.00134353	0.0354587	136103_t	411	Histone H3.2 partial [Cajanus cajan]	Medtr8g103245.1_core_histone_H2A/H2B/H3/H4_HC_chr8:43480135-43479451_20140818
263.635	1.12355	8.08e-05	0.00488496	MSTRG.14259.13	1804	polyadenylation and cleavage factor 11-like protein [Trifolium pratense]	Medtr6g011450.2_PCF11P-related_protein_HC_chr6:3248562-3252804_20140818
58.4987	1.12351	0.00116147	0.0322688	MSTRG.82634.5	1036	50S ribosomal protein L3P [Medicago truncatula]/gi	Medtr1g093060.1_50S_ribosomal_protein_L3P_HC_chr1:41908852-41905135_20140818
133.017	1.12281	8.71e-05	0.0051498	MSTRG.5567.4	2475	serine/threonine-protein phosphatase 7 long form-like protein [Trifolium pratense]/gi	Medtr3g451080.1_hypothetical_protein_LC_chr3:17724583-17723909_20140818
194.235	1.1224	0.00193274	0.0453947	MSTRG.58380.9	2073	hypothetical protein MTR_1g492690 [Medicago truncatula]/gi	Medtr1g492690.1_hypothetical_protein_HC_chr1:41541171-41539306_20140818
209.753	1.12142	4.86e-05	0.00337201	187776_t	861	nucleotide-diphospho-sugar transferase family protein partial [Medicago truncatula]/gi	Medtr1g044340.1_nucleotide-diphospho-sugar_transferase_family_protein_HC_chr1:16644782-16643150_20140818
305.461	1.1211	1.22e-06	0.000198319	MSTRG.45021.3	905	---NA---	---NA---
376.502	1.12016	0.000939892	0.0279374	MSTRG.70124.2	1540	stress up-regulated Nod 19 protein [Medicago truncatula]/gi	Medtr2g030470.1_stress_up-regulated_Nod_19_protein_LC_chr2:11471036-11480994_20140818
221.361	1.11908	8.54e-05	0.00507987	MSTRG.4738.1	684	---NA---	Medtr3g028490.1_hypothetical_protein_LC_chr3:9029562-9028975_20140818
219.777	1.1174	1.57e-05	0.00145382	MSTRG.40918.2	1871	transmembrane amino acid transporter family protein [Medicago truncatula]/gi	Medtr5g083760.1_transmembrane_amino_acid_transporter_family_protein_HC_chr5:36131798-36134727_20140818
54.0636	1.11707	0.00125569	0.0339582	MSTRG.83923.1	1517	PREDICTED: TMV resistance protein N-like [Vigna angularis]	Medtr7g090730.1_hypothetical_protein_LC_chr7:35725867-35723628_20140818
55.4583	1.117	0.00223735	0.0499806	MSTRG.6222.1	1120	---NA---	Medtr3g048970.1_transmembrane_protein,_putative_HC_chr3:18203855-18205353_20140818
279.616	1.11693	6.94e-05	0.00437894	MSTRG.64499.2	247	---NA---	---NA---
606.707	1.11485	7.03e-06	0.000775197	MSTRG.16276.1	2307	Serine/Threonine-kinase rio2 [Medicago truncatula]/gi	Medtr4g094615.1_Serine/Threonine-kinase_rio2_HC_chr4:38390417-38383829_20140818
186.712	1.1136	0.000235613	0.0106855	63307_t	384	unknown [Medicago truncatula]	Medtr7g065260.1_glutathione_S-transferase_HC_chr7:23798295-23796391_20140818
1187.39	1.1136	0.000725601	0.0234925	MSTRG.47039.1	1902	class I glutamine amidotransferase [Medicago truncatula]/gi	Medtr6g004280.1_class_I_glutamine_amidotransferase_HC_chr6:218503-220686_20140818
200.903	1.11325	0.000354116	0.0143651	MSTRG.17022.1	2604	P-loop nucleoside triphosphate hydrolase superfamily protein [Medicago truncatula]/gi	Medtr1g075260.1_P-loop_nucleoside_triphosphate_hydrolase_superfamily_protein_HC_chr1:33314108-33308798_20140818
333.683	1.11316	2.53e-05	0.00208575	MSTRG.72412.6	2223	S-locus lectin kinase family protein [Medicago truncatula]/gi	Medtr0090s0020.1_S-locus_lectin_kinase_family_protein_HC_scaffold0090:10869-7455_20140818
88.9497	1.1129	0.00038363	0.0151691	MSTRG.80721.1	1792	alpha/beta-hydrolase superfamily protein [Medicago truncatula]/gi	Medtr8g086260.3_alpha/beta-hydrolase_superfamily_protein_HC_chr8:35763700-35771361_20140818
281.091	1.11182	5.81e-05	0.00383793	MSTRG.77563.26	4698	LRR and NB-ARC domain disease resistance protein [Medicago truncatula]/gi	Medtr0425s0020.1_LRR_and_NB-ARC_domain_disease_resistance_protein_LC_scaffold0425:6387-10157_20140818
2154.36	1.11133	3.09e-06	0.000411175	MSTRG.32696.6	683	unknown [Medicago truncatula]/gi	Medtr7g065130.1_hypothetical_protein_HC_chr7:23733151-23734236_20140818
67.3903	1.1112	0.00100001	0.0290664	102290_t	399	hydroxyproline-rich glycoprotein family protein putative [Medicago truncatula]/gi	Medtr8g067590.1_hydroxyproline-rich_glycoprotein_family_protein,_putative_HC_chr8:28232438-28233675_20140818
1704.46	1.11067	0.000333507	0.0137414	MSTRG.21483.3	1103	PB1 domain protein [Medicago truncatula]/gi	Medtr5g032960.1_PB1_domain_protein_HC_chr5:14201643-14199883_20140818
858.885	1.11057	0.00037568	0.014981	MSTRG.45040.1	1507	matrix metalloproteinase [Medicago truncatula]/gi	Medtr5g036080.1_matrix_metalloproteinase_HC_chr5:15713228-15714934_20140818
548.066	1.11046	0.000647527	0.021765	113885_t	1257	benzyl alcohol O-benzoyltransferase [Medicago truncatula]/gi	Medtr1g040315.1_benzyl_alcohol_O-benzoyltransferase_HC_chr1:14875267-14872952_20140818
364.883	1.1101	0.000134736	0.0071534	MSTRG.52451.2	2669	probable splicing factor 3A subunit 1 [Prunus persica]/gi	Medtr8g106170.1_SWAP_(suppressor-of-white-APricot)/surp_domain_protein_HC_chr8:44842026-44847356_20140818
215.215	1.10973	0.000189309	0.00913648	141149_t	6126	hypothetical protein TSUD_62940 [Trifolium subterraneum]	Medtr3g118040.1_armadillo/beta-catenin-like_repeat_protein_HC_chr3:55236053-55262345_20140818
89.0688	1.10907	1.8e-05	0.00161371	MSTRG.81915.1	1974	PPR containing plant-like protein [Medicago truncatula]/gi	Medtr3g033040.2_PPR_containing_plant-like_protein_HC_chr3:10491879-10488531_20140818
205.088	1.10868	0.000577988	0.0200634	49469_t	1236	MtN19 [Medicago truncatula]	Medtr2g030470.1_stress_up-regulated_Nod_19_protein_LC_chr2:11471036-11480994_20140818
99.6476	1.10867	0.00120704	0.0330794	MSTRG.64371.10	1551	F-box/FBD-like domain protein [Medicago truncatula]/gi	Medtr5g038430.1_F-box/FBD-like_domain_protein_HC_chr5:16855539-16866753_20140818
70.4446	1.10639	0.00201124	0.0466007	MSTRG.64736.11	3970	rhodanese/cell cycle control phosphatase superfamily protein [Medicago truncatula]/gi	Medtr3g084030.2_rhodanese/cell_cycle_control_phosphatase_superfamily_protein_LC_chr3:37958546-37933056_20140818
868.093	1.10533	6.64e-06	0.000745243	MSTRG.27037.4	801	---NA---	---NA---
133.966	1.10509	0.00168469	0.0414937	MSTRG.21335.4	902	FAD-dependent urate hydroxylase-like protein [Medicago truncatula]/gi	Medtr1g112740.1_FAD-dependent_urate_hydroxylase-like_protein_HC_chr1:51033678-51030071_20140818
149.601	1.10491	0.000495538	0.0180042	MSTRG.38444.2	1775	hypothetical protein MTR_0232s0030 [Medicago truncatula]/gi	Medtr0232s0030.1_hypothetical_protein_HC_scaffold0232:12112-14908_20140818
187.168	1.10489	6.04e-06	0.000692452	MSTRG.72118.14	1488	glycosyltransferase family 90 protein [Medicago truncatula]/gi	Medtr8g031470.1_glycosyltransferase_family_90_protein_HC_chr8:11807748-11811706_20140818
283.969	1.10227	2.21e-05	0.00188012	MSTRG.48135.3	4272	protein FAR1-related sequence 5-like [Trifolium pratense]	Medtr7g446480.1_hypothetical_protein_LC_chr7:15845592-15844432_20140818
94.4369	1.10192	0.00043875	0.0165872	MSTRG.32829.5	1502	PREDICTED: putative threonine aspartase isoform X1 [Glycine max]/gi	Medtr8g031580.2_isoaspartyl_peptidase/L-asparaginase_HC_chr8:11860252-11857170_20140818
121.256	1.10167	0.00055824	0.0195797	MSTRG.1965.3	1893	disease resistance protein (CC-NBS-LRR class) family protein [Medicago truncatula]/gi	Medtr2g072110.2_disease_resistance_protein_(CC-NBS-LRR_class)_family_protein_LC_chr2:30246991-30255319_20140818
774.023	1.10137	0.00115688	0.0321886	MSTRG.78464.1	338	---NA---	---NA---
87.881	1.10113	0.00217668	0.0491251	MSTRG.79026.3	1452	hypothetical protein TSUD_239610 [Trifolium subterraneum]	Medtr2g092960.1_Myb/SANT-like_DNA-binding_domain_protein_LC_chr2:39569693-39563388_20140818
83.6717	1.101	0.00214501	0.048646	MSTRG.64371.8	1554	F-box/FBD-like domain protein [Medicago truncatula]/gi	Medtr5g038430.1_F-box/FBD-like_domain_protein_HC_chr5:16855539-16866753_20140818
70.6607	1.10096	0.000704964	0.0230804	MSTRG.80721.2	1307	alpha/beta-hydrolase superfamily protein [Medicago truncatula]/gi	Medtr8g086260.1_alpha/beta-hydrolase_superfamily_protein_HC_chr8:35763700-35771375_20140818
368.296	1.10036	0.000207343	0.00976648	MSTRG.42879.1	421	PREDICTED: uncharacterized protein LOC101512970 [Cicer arietinum]	Medtr4g459450.1_zinc_finger,_C3HC4_type_family_protein,_putative_HC_chr4:21880077-21878022_20140818
450.835	1.1003	0.000122246	0.00666853	MSTRG.41135.1	1505	DUF3774 domain protein [Medicago truncatula]/gi	Medtr2g090015.1_DUF3774_domain_protein_HC_chr2:38092576-38093398_20140818
69.6975	1.09958	0.000935104	0.0278325	MSTRG.39098.2	983	kinase family protein putative [Medicago truncatula]/gi	Medtr1g051310.1_kinase_family_protein,_putative_HC_chr1:20088196-20089024_20140818
128.557	1.0992	0.00128963	0.0345499	174158_t	2871	shoot gravitropism 2 (SGR2) protein [Medicago truncatula]/gi	Medtr4g033490.1_shoot_gravitropism_2_(SGR2)_protein_HC_chr4:11966630-11953780_20140818
5485.77	1.09776	8.42e-05	0.00504219	126759_t	1260	hypothetical protein KK1_048371 [Cajanus cajan]	---NA---
205.268	1.09775	0.000670541	0.022321	MSTRG.27488.2	10606	hypothetical protein PHAVU_010G091100g [Phaseolus vulgaris]/gi	Medtr8g028500.1_Rpp4C1_HC_chr8:10848011-10860059_20140818
98.1697	1.09772	0.00111037	0.0312424	73041_t	903	male sterility MS5 family protein [Medicago truncatula]/gi	Medtr7g058930.1_male_sterility_MS5_family_protein_HC_chr7:21253696-21249411_20140818
151.894	1.09655	9.51e-06	0.000982858	MSTRG.57411.3	1700	plant/F17J16-140 protein [Medicago truncatula]/gi	Medtr5g091370.1_plant/F17J16-140_protein_HC_chr5:39820050-39823455_20140818
63.5222	1.09584	0.000818858	0.0254074	155319_t	5669	hypothetical protein TSUD_321200 [Trifolium subterraneum]	Medtr0007s0140.1_disease_resistance_protein_(TIR-NBS-LRR_class),_putative_LC_scaffold0007:65325-72860_20140818
421.298	1.09326	1.17e-05	0.00114681	MSTRG.44354.5	920	E3 ubiquitin-protein ligase HERC2-like protein [Medicago truncatula]/gi	Medtr1g006695.1_E3_ubiquitin-protein_ligase_HERC2-like_protein_HC_chr1:114562-111983_20140818
75.8702	1.09221	0.00024829	0.0110852	MSTRG.83923.3	1364	PREDICTED: TMV resistance protein N-like [Vigna angularis]	Medtr7g090730.1_hypothetical_protein_LC_chr7:35725867-35723628_20140818
698.548	1.09162	0.00201724	0.0466927	MSTRG.81727.2	843	Kunitz type trypsin inhibitor / Alpha-fucosidase [Medicago truncatula]/gi	Medtr6g059730.1_Kunitz_type_trypsin_inhibitor_/_Alpha-fucosidase_HC_chr6:20493190-20494222_20140818
1069.34	1.09107	0.000632504	0.0214286	MSTRG.41565.3	1564	2OG-Fe(II) oxygenase family oxidoreductase [Medicago truncatula]/gi	Medtr7g063730.1_2OG-Fe(II)_oxygenase_family_oxidoreductase_HC_chr7:23276759-23278907_20140818
427.315	1.09	1.87e-07	4.38e-05	MSTRG.38691.2	3140	hypothetical protein TSUD_93420 [Trifolium subterraneum]	Medtr1g070355.1_FAR1_DNA-binding_domain_protein_LC_chr1:31110429-31113072_20140818
319.944	1.08932	4.17e-06	0.000517277	MSTRG.16814.2	1942	stress up-regulated Nod 19 protein [Medicago truncatula]/gi	Medtr2g030470.1_stress_up-regulated_Nod_19_protein_LC_chr2:11471036-11480994_20140818
82.5083	1.08804	0.00209492	0.0478827	161110_t	1242	cytochrome P450 family 71 protein [Medicago truncatula]/gi	Medtr4g048580.1_cytochrome_P450_family_71_protein_HC_chr4:17250064-17248200_20140818
208.649	1.08741	0.000180507	0.00881047	MSTRG.17199.24	990	hypothetical protein MTR_4g016590 [Medicago truncatula]/gi	Medtr4g016590.1_hypothetical_protein_HC_chr4:5074660-5083977_20140818
206.205	1.0871	1.78e-07	4.27e-05	MSTRG.44166.2	1142	unknown [Medicago truncatula]/gi	Medtr7g085450.1_PHD_finger-like_protein_HC_chr7:33106030-33108687_20140818
113.862	1.0865	2.02e-05	0.00175475	164042_t	612	hypothetical protein TSUD_122530 [Trifolium subterraneum]	---NA---
3804.76	1.08575	0.000145312	0.00751152	1382_t	786	hypothetical protein MtrDRAFT_AC158502g25v2 [Medicago truncatula]	Medtr7g068350.1_transmembrane_protein,_putative_LC_chr7:25002434-25001592_20140818
384.833	1.08553	5.47e-07	0.00010324	MSTRG.36628.2	2282	PREDICTED: uncharacterized protein LOC100799062 [Glycine max]/gi	Medtr2g078350.1_calcium-binding_EF-hand_protein_HC_chr2:32631917-32635869_20140818
50.0915	1.08536	0.00120081	0.0329575	38157_t	5082	HhH-GPD base excision DNA repair family protein [Medicago truncatula]/gi	Medtr1g492760.1_HhH-GPD_base_excision_DNA_repair_family_protein_HC_chr1:41588190-41596220_20140818
194.697	1.08525	0.000714862	0.0232712	MSTRG.17762.7	1575	sugar transporter ERD6-like 16-like protein partial [Trifolium pratense]	Medtr4g118610.2_sugar_porter_(SP)_family_MFS_transporter_HC_chr4:49131241-49135079_20140818
60.9044	1.08479	0.00200546	0.0465069	MSTRG.70670.1	355	---NA---	---NA---
67.1983	1.08472	0.000357061	0.0144392	MSTRG.31567.4	809	RecQ family ATP-dependent DNA helicase [Medicago truncatula]/gi	Medtr2g042440.1_RecQ_family_ATP-dependent_DNA_helicase_HC_chr2:18525936-18516322_20140818
181.78	1.08329	0.00171013	0.0418746	MSTRG.4870.10	294	glutathione S-transferase [Medicago truncatula]/gi	Medtr7g065260.1_glutathione_S-transferase_HC_chr7:23798295-23796391_20140818
94.2662	1.0823	0.000605177	0.0207469	MSTRG.34736.6	1222	unknown [Medicago truncatula]/gi	Medtr7g015130.1_NLI_interacting_factor-like_phosphatase_HC_chr7:4576595-4571474_20140818
514.676	1.0821	6.92e-05	0.0043694	59019_t	363	unknown [Medicago truncatula]/gi	Medtr8g089790.1_60S_acidic_ribosomal_protein_HC_chr8:37423779-37422494_20140818
214.039	1.08173	7.29e-06	0.000794242	117552_t	2448	S-locus lectin kinase family protein [Medicago truncatula]/gi	Medtr0090s0020.1_S-locus_lectin_kinase_family_protein_HC_scaffold0090:10869-7455_20140818
594.031	1.08163	4.29e-06	0.000528436	MSTRG.19178.2	942	DSBA oxidoreductase family protein [Medicago truncatula]/gi	Medtr7g016650.2_DSBA_oxidoreductase_family_protein_HC_chr7:5267213-5271627_20140818
1175.69	1.08038	0.000717935	0.0233125	MSTRG.21483.4	822	PB1 domain protein [Medicago truncatula]/gi	Medtr5g032960.1_PB1_domain_protein_HC_chr5:14201643-14199883_20140818
165.654	1.07983	0.00114793	0.031997	MSTRG.45052.1	1545	L-allo-threonine aldolase-like protein [Medicago truncatula]/gi	Medtr1g080250.2_L-allo-threonine_aldolase-like_protein_HC_chr1:35635505-35627093_20140818
351.602	1.07976	3.88e-07	7.81e-05	MSTRG.36628.1	2155	calcium-binding EF-hand protein [Medicago truncatula]/gi	Medtr2g078350.1_calcium-binding_EF-hand_protein_HC_chr2:32631917-32635869_20140818
147.038	1.07864	4.75e-05	0.00331908	MSTRG.15836.1	341	profilin [Medicago truncatula]/gi	Medtr8g102330.1_profilin_HC_chr8:43051409-43056475_20140818
56.2918	1.07781	0.00142932	0.0370785	MSTRG.69465.1	1379	S-locus lectin kinase family protein [Medicago truncatula]/gi	Medtr8g465990.2_S-locus_lectin_kinase_family_protein_HC_chr8:23563321-23559692_20140818
120.304	1.07672	0.000228099	0.0104364	9146_t	786	disease resistance protein (TIR-NBS-LRR class) [Medicago truncatula]/gi	Medtr5g037700.1_disease_resistance_protein_(TIR-NBS-LRR_class)_LC_chr5:16495070-16493385_20140818
1555.5	1.07607	0.000512247	0.0183914	MSTRG.37415.6	1470	phospholipase A1 [Medicago truncatula]/gi	Medtr4g087830.1_phospholipase_A1_HC_chr4:34558798-34555984_20140818
844.889	1.07567	0.00117178	0.0324517	MSTRG.1848.1	883	transmembrane protein putative [Medicago truncatula]/gi	Medtr8g037800.1_transmembrane_protein,_putative_HC_chr8:14009646-14008162_20140818
243.044	1.07537	1.88e-05	0.00166545	MSTRG.12881.4	823	---NA---	---NA---
73.1395	1.07518	0.000213867	0.00997754	MSTRG.47263.6	1329	RNA pseudouridine synthase [Medicago truncatula]/gi	Medtr7g029385.1_RNA_pseudouridine_synthase_HC_chr7:10453073-10460793_20140818
104.001	1.07501	0.000298032	0.0126532	132237_t	2178	beta-amylase-like protein [Medicago truncatula]/gi	Medtr7g077410.1_beta-amylase-like_protein_HC_chr7:29234191-29227868_20140818
898.489	1.07438	0.000486458	0.0177953	MSTRG.41565.8	1568	2OG-Fe(II) oxygenase family oxidoreductase [Medicago truncatula]/gi	Medtr7g063730.1_2OG-Fe(II)_oxygenase_family_oxidoreductase_HC_chr7:23276759-23278907_20140818
221.69	1.07338	0.000348382	0.014195	MSTRG.42879.3	340	PREDICTED: uncharacterized protein LOC101512970 [Cicer arietinum]	Medtr4g459450.1_zinc_finger,_C3HC4_type_family_protein,_putative_HC_chr4:21880077-21878022_20140818
316.955	1.07329	0.000735837	0.0236992	MSTRG.44154.2	1707	NAC transcription factor-like protein [Medicago truncatula]/gi	Medtr7g085220.1_NAC_transcription_factor-like_protein_HC_chr7:32967009-32968969_20140818
150.202	1.07289	1.92e-06	0.0002834	MSTRG.61920.5	311	---NA---	---NA---
197.943	1.07235	5.5e-05	0.00368542	147416_t	1839	disease resistance protein (TIR-NBS-LRR class) [Medicago truncatula]/gi	Medtr6g471270.2_disease_resistance_protein_(TIR-NBS-LRR_class)_LC_chr6:25546560-25548516_20140818
2528.11	1.07114	3.85e-06	0.000485971	MSTRG.32696.2	479	unknown [Medicago truncatula]/gi	Medtr7g065130.1_hypothetical_protein_HC_chr7:23733151-23734236_20140818
567.931	1.07094	4.81e-06	0.000578869	MSTRG.16276.2	1810	Serine/Threonine-kinase rio2 [Medicago truncatula]/gi	Medtr4g094615.1_Serine/Threonine-kinase_rio2_HC_chr4:38390417-38383829_20140818
83.9361	1.07037	0.00172276	0.0420767	MSTRG.42013.1	1981	F-box/RNI/FBD-like domain protein [Medicago truncatula]/gi	Medtr8g070950.1_F-box/RNI/FBD-like_domain_protein_LC_chr8:30076724-30079062_20140818
114.67	1.07005	0.00157746	0.0395914	MSTRG.12641.5	674	---NA---	---NA---
3844.28	1.06973	5.81e-05	0.003841	MSTRG.9189.1	983	ribosomal protein L7Ae/L30e/S12e/Gadd45 family protein [Medicago truncatula]/gi	Medtr8g093770.1_ribosomal_protein_L7Ae/L30e/S12e/Gadd45_family_protein_HC_chr8:39234618-39232241_20140818
166.372	1.06945	1.82e-06	0.000271853	10497_t	948	myb transcription factor [Medicago truncatula]/gi	Medtr2g095520.1_myb_transcription_factor_HC_chr2:40820355-40818577_20140818
709.763	1.06904	1.02e-07	2.71e-05	MSTRG.21686.2	1901	stress up-regulated Nod 19 protein [Medicago truncatula]/gi	Medtr4g094548.1_stress_up-regulated_Nod_19_protein_HC_chr4:38215776-38212479_20140818
605.727	1.06845	0.000440357	0.0166156	MSTRG.10850.1	232	---NA---	---NA---
170.245	1.06737	0.000117579	0.00645941	186785_t	4749	disease resistance protein (CC-NBS-LRR class) family protein [Medicago truncatula]/gi	Medtr2g072110.2_disease_resistance_protein_(CC-NBS-LRR_class)_family_protein_LC_chr2:30246991-30255319_20140818
140.367	1.06583	0.00177706	0.0430199	MSTRG.83953.8	1135	---NA---	---NA---
378.927	1.06564	0.00166899	0.0412508	MSTRG.70124.1	1680	stress up-regulated Nod 19 protein [Medicago truncatula]/gi	Medtr2g030470.1_stress_up-regulated_Nod_19_protein_LC_chr2:11471036-11480994_20140818
101.494	1.06552	0.00139378	0.0364409	MSTRG.54860.29	3235	paired amphipathic helix SIN3-like protein [Medicago truncatula]/gi	Medtr8g062700.1_paired_amphipathic_helix_SIN3-like_protein_HC_chr8:26215827-26198402_20140818
279.664	1.06551	2.11e-06	0.00030368	MSTRG.6829.2	2367	hypothetical protein MTR_2g048920 [Medicago truncatula]/gi	Medtr2g048920.1_hypothetical_protein_LC_chr2:21607580-21609740_20140818
74.6287	1.06462	0.000491428	0.0179095	MSTRG.69984.1	1655	appr-1-P processing enzyme family protein [Medicago truncatula]/gi	Medtr4g082640.1_appr-1-P_processing_enzyme_family_protein_HC_chr4:32173838-32166307_20140818
113.25	1.06432	0.00223606	0.049966	MSTRG.56315.1	3455	LRR receptor-like kinase family protein [Medicago truncatula]/gi	Medtr7g045710.1_LRR_receptor-like_kinase_family_protein_LC_chr7:16100886-16104412_20140818
230.34	1.06297	0.00061364	0.0209674	MSTRG.72412.3	2664	S-locus lectin kinase family protein [Medicago truncatula]/gi	Medtr0090s0020.1_S-locus_lectin_kinase_family_protein_HC_scaffold0090:10869-7455_20140818
131.174	1.06215	7.12e-05	0.00445788	46812_t	3015	disease resistance protein (TIR-NBS-LRR class) [Medicago truncatula]/gi	Medtr2g039770.1_disease_resistance_protein_(TIR-NBS-LRR_class)_LC_chr2:17437701-17443829_20140818
4328.78	1.06095	0.000877412	0.0266374	MSTRG.34131.2	2927	galactinol-raffinose galactosyltransferase [Medicago truncatula]/gi	Medtr7g091880.1_galactinol-raffinose_galactosyltransferase_HC_chr7:36372945-36367215_20140818
254.273	1.06084	9.78e-06	0.00100243	110324_t	2082	PREDICTED: uncharacterized protein LOC100799062 [Glycine max]/gi	Medtr2g078350.1_calcium-binding_EF-hand_protein_HC_chr2:32631917-32635869_20140818
126.021	1.05916	0.000137029	0.00723546	181394_t	1950	L-type lectin-domain receptor kinase IX.1 [Medicago truncatula]/gi	Medtr8g067930.1_L-type_lectin-domain_receptor_kinase_IX.1_HC_chr8:28306163-28303905_20140818
345.676	1.05868	0.00129356	0.034621	MSTRG.710.1	1294	hypothetical protein TSUD_348660 [Trifolium subterraneum]	Medtr8g033410.1_D-glycerate_dehydrogenase/hydroxypyruvate_reductase_HC_chr8:12899674-12896960_20140818
116.533	1.0585	0.00183413	0.0439311	MSTRG.14402.8	1488	anaphase-promoting complex subunit 1 [Medicago truncatula]/gi	Medtr5g082890.1_anaphase-promoting_complex_subunit_1_HC_chr5:35723483-35692350_20140818
269.789	1.05766	3.23e-08	1.03e-05	MSTRG.44166.1	1264	unknown [Medicago truncatula]/gi	Medtr7g085450.1_PHD_finger-like_protein_HC_chr7:33106030-33108687_20140818
112.186	1.05621	0.000187609	0.00907141	MSTRG.76740.4	1279	pumilio-like protein [Medicago truncatula]/gi	Medtr4g120470.1_pumilio-like_protein_HC_chr4:49940997-49933657_20140818
365.368	1.05619	6.25e-07	0.000114358	MSTRG.45021.1	1024	---NA---	---NA---
397.679	1.05555	0.000393738	0.0154505	MSTRG.57371.1	838	chromoplast heme oxygenase 1 [Medicago sativa]	Medtr8g019320.1_heme_oxygenase_1_protein_HC_chr8:6783092-6779343_20140818
464.823	1.05528	0.00023929	0.0107985	MSTRG.38118.1	1783	nucleotide-diphospho-sugar transferase family protein [Medicago truncatula]/gi	Medtr8g007400.1_nucleotide-diphospho-sugar_transferase_family_protein_HC_chr8:1520909-1517715_20140818
80.2516	1.05509	1.04e-05	0.00105374	26155_t	837	homeobox associated leucine zipper protein [Medicago truncatula]/gi	Medtr7g093430.1_homeobox_associated_leucine_zipper_protein_HC_chr7:37139196-37141155_20140818
297.062	1.05499	8.86e-07	0.000152751	MSTRG.42704.6	805	plant-specific domain TIGR01615 family protein [Medicago truncatula]/gi	Medtr4g088770.1_plant-specific_domain_TIGR01615_family_protein_HC_chr4:35374567-35372760_20140818
1032.16	1.0545	3.71e-05	0.0027797	MSTRG.54741.1	1824	---NA---	---NA---
235.857	1.05365	0.000288322	0.0123522	97096_t	3201	PREDICTED: TMV resistance protein N-like [Cicer arietinum]	Medtr6g072320.1_disease_resistance_protein_(TIR-NBS-LRR_class)_LC_chr6:26761798-26765665_20140818
329.24	1.05345	5.68e-05	0.00377329	MSTRG.1057.2	727	ATP-dependent Clp protease adaptor protein ClpS [Medicago truncatula]/gi	Medtr5g054770.1_ATP-dependent_Clp_protease_adaptor_protein_ClpS_HC_chr5:22566023-22570033_20140818
1000.9	1.05317	0.000841654	0.0259278	MSTRG.41565.2	1575	2OG-Fe(II) oxygenase family oxidoreductase [Medicago truncatula]/gi	Medtr7g063730.1_2OG-Fe(II)_oxygenase_family_oxidoreductase_HC_chr7:23276759-23278907_20140818
320.326	1.05316	0.00180591	0.0434839	MSTRG.29707.1	357	---NA---	Medtr3g435200.1_YGL010w-like_protein_HC_chr3:11485231-11484116_20140818
290.826	1.05226	0.00011292	0.0062633	MSTRG.39031.1	1032	unknown [Medicago truncatula]/gi	Medtr4g007290.1_transmembrane_protein,_putative_HC_chr4:1073636-1078076_20140818
96.5651	1.05181	0.000778273	0.0245713	86723_t	2490	NBS-LRR type disease resistance protein [Medicago truncatula]/gi	Medtr3g012310.1_NBS-LRR_type_disease_resistance_protein_HC_chr3:3358225-3354416_20140818
614.725	1.05108	0.000128364	0.00690498	MSTRG.59683.8	2124	fructan exohydrolase [Medicago truncatula]/gi	Medtr1g015970.1_fructan_exohydrolase_HC_chr1:4139183-4135963_20140818
224.683	1.04843	4.66e-05	0.00327154	MSTRG.16814.4	2351	stress up-regulated Nod 19 protein [Medicago truncatula]/gi	Medtr2g030470.1_stress_up-regulated_Nod_19_protein_LC_chr2:11471036-11480994_20140818
197.015	1.04825	0.000719516	0.0233492	MSTRG.14402.5	2086	anaphase-promoting complex subunit 1 [Medicago truncatula]/gi	Medtr5g082890.1_anaphase-promoting_complex_subunit_1_HC_chr5:35723483-35692350_20140818
370.667	1.04824	8.6e-05	0.00509781	47412_t	639	holocarboxylase synthetase [Medicago truncatula]/gi	Medtr8g092210.1_holocarboxylase_synthetase_HC_chr8:38536335-38539856_20140818
114.583	1.04771	0.000174473	0.00858903	MSTRG.2829.3	1138	2OG-Fe(II) oxygenase family oxidoreductase [Medicago truncatula]/gi	Medtr0314s0030.1_2OG-Fe(II)_oxygenase_family_oxidoreductase_HC_scaffold0314:17701-8404_20140818
81.9195	1.04697	0.000189584	0.0091435	19632_t	2790	LRR receptor-like kinase [Medicago truncatula]/gi	Medtr5g019070.1_LRR_receptor-like_kinase_LC_chr5:7190704-7193875_20140818
213.737	1.04681	7.89e-05	0.00481802	190316_t	4254	disease resistance protein RGA4 [Medicago truncatula]/gi	Medtr5g070960.1_disease_resistance_protein_RGA4_HC_chr5:30062044-30058913_20140818
202.783	1.04676	0.000507582	0.0182959	MSTRG.25957.3	816	WNK kinase [Medicago truncatula]/gi	Medtr5g075220.1_WNK_kinase_HC_chr5:31954029-31949940_20140818
191.606	1.04672	0.00135637	0.0357002	MSTRG.11839.1	3798	PREDICTED: leucine-rich repeat receptor protein kinase MSP1-like isoform X1 [Cicer arietinum]	Medtr7g066590.1_LRR_receptor-like_kinase_HC_chr7:24243931-24241034_20140818
72.6943	1.0467	0.00164241	0.0408287	MSTRG.47006.1	886	hypothetical protein MTR_1g072310 [Medicago truncatula]/gi	Medtr1g072310.1_hypothetical_protein_HC_chr1:32094169-32095458_20140818
297.296	1.04651	0.0015987	0.0399861	MSTRG.3185.2	2750	unknown [Medicago truncatula]	Medtr6g090515.1_charged_multivesicular_body_protein_HC_chr6:34403252-34407494_20140818
151.489	1.04638	7.42e-06	0.000807709	MSTRG.9879.6	1455	DNA repair helicase XPB1 [Medicago truncatula]/gi	Medtr8g098675.1_DNA_repair_helicase_XPB1_HC_chr8:41191751-41200265_20140818
105.236	1.0452	0.000427573	0.0163315	MSTRG.65873.8	930	cyclopropane-fatty-acyl-phospholipid synthase [Medicago truncatula]/gi	Medtr1g073700.1_cyclopropane-fatty-acyl-phospholipid_synthase_HC_chr1:32708616-32700293_20140818
93.6503	1.04427	8.33e-05	0.00500581	MSTRG.40611.1	1767	ABC transporter-like family-protein [Medicago truncatula]/gi	Medtr6g034310.2_ABC_transporter-like_family-protein_HC_chr6:11712647-11705613_20140818
227.225	1.04409	0.000232094	0.0105848	MSTRG.68318.2	3063	PREDICTED: TMV resistance protein N-like [Cicer arietinum]	Medtr6g072250.1_disease_resistance_protein_(TIR-NBS-LRR_class)_LC_chr6:26728792-26732864_20140818
314.678	1.04399	7.6e-05	0.00467567	MSTRG.38604.6	454	60S ribosomal protein L32-1 [Medicago truncatula]/gi	Medtr8g085740.1_60S_ribosomal_protein_L32-1_HC_chr8:35544567-35546244_20140818
185.03	1.04399	0.000295367	0.0125815	182016_t	399	thioredoxin-like protein [Medicago truncatula]/gi	Medtr3g027090.1_thioredoxin-like_protein_HC_chr3:8382516-8384675_20140818
279.995	1.04373	0.00135994	0.035776	MSTRG.29170.5	548	---NA---	---NA---
203.552	1.04348	7.4e-05	0.00458977	MSTRG.48261.2	1461	glycoside hydrolase family 1 protein [Medicago truncatula]/gi	Medtr4g016920.1_glycoside_hydrolase_family_1_protein_HC_chr4:5221708-5216027_20140818
4521	1.0434	6.15e-05	0.00399833	9241_t	1200	hypothetical protein MtrDRAFT_AC158502g25v2 [Medicago truncatula]	Medtr4g014460.1_abscisic_acid_receptor_HC_chr4:4083299-4081745_20140818
58.4526	1.04307	0.000942855	0.0279986	170940_t	1260	F-box protein interaction domain protein [Medicago truncatula]/gi	Medtr7g056390.1_F-box_protein_interaction_domain_protein_LC_chr7:19888930-19885945_20140818
372.77	1.04242	0.00018969	0.0091435	MSTRG.14259.3	2816	polyadenylation and cleavage factor 11-like protein [Trifolium pratense]	Medtr6g011450.2_PCF11P-related_protein_HC_chr6:3248562-3252804_20140818
314.386	1.04191	5.98e-05	0.00392343	MSTRG.73428.1	1538	---NA---	---NA---
366.824	1.04106	0.000864522	0.0264064	MSTRG.30495.4	536	plant/F18B13-26 protein [Medicago truncatula]/gi	Medtr4g011060.1_plant/F18B13-26_protein_HC_chr4:2600967-2600575_20140818
746.725	1.04057	2.05e-09	9.51e-07	MSTRG.81122.3	1679	F-box protein PP2-A13 [Medicago truncatula]/gi	Medtr0002s0020.1_F-box_protein_PP2-A13_HC_scaffold0002:6674-10318_20140818
147.516	1.04055	5.19e-05	0.00353563	32292_t	528	hypothetical protein TSUD_171690 [Trifolium subterraneum]	Medtr7g023560.1_C2H2-type_zinc_finger_protein_HC_chr7:7688191-7687352_20140818
171.315	1.03998	1.38e-05	0.00131052	83217_t	1809	hypothetical protein MTR_2g048920 [Medicago truncatula]/gi	Medtr2g048920.1_hypothetical_protein_LC_chr2:21607580-21609740_20140818
823.233	1.03988	4.46e-06	0.000545897	MSTRG.16649.2	2180	NAD(P)H dehydrogenase B2 [Medicago truncatula]/gi	Medtr5g071250.1_NAD(P)H_dehydrogenase_B2_HC_chr5:30222533-30215877_20140818
235.496	1.03978	0.0010778	0.0305926	MSTRG.33171.11	1249	carbonic anhydrase family protein [Medicago truncatula]/gi	Medtr5g066060.1_carbonic_anhydrase_family_protein_HC_chr5:27838008-27834404_20140818
77.516	1.03965	0.000376243	0.0149919	MSTRG.60894.3	460	glycyl-tRNA synthetase/glycine-tRNA ligase [Medicago truncatula]/gi	Medtr7g406850.1_glycyl-tRNA_synthetase/glycine-tRNA_ligase_HC_chr7:942169-936679_20140818
219.285	1.03898	0.0020778	0.0476462	MSTRG.65873.3	2001	cyclopropane-fatty-acyl-phospholipid synthase [Medicago truncatula]/gi	Medtr1g073700.1_cyclopropane-fatty-acyl-phospholipid_synthase_HC_chr1:32708616-32700293_20140818
184.674	1.0389	1.92e-05	0.00169176	MSTRG.57515.3	1347	Serine/Threonine kinase family protein [Medicago truncatula]/gi	Medtr6g083980.1_Serine/Threonine_kinase_family_protein_HC_chr6:31351315-31355795_20140818
112.518	1.03888	0.00166541	0.0412155	161207_t	1650	P-loop nucleoside triphosphate hydrolase superfamily protein [Medicago truncatula]/gi	Medtr1g075260.1_P-loop_nucleoside_triphosphate_hydrolase_superfamily_protein_HC_chr1:33314108-33308798_20140818
307.232	1.03884	0.000137205	0.00724227	MSTRG.72412.4	2596	S-locus lectin kinase family protein [Medicago truncatula]/gi	Medtr0090s0020.1_S-locus_lectin_kinase_family_protein_HC_scaffold0090:10869-7455_20140818
276.944	1.03865	4.06e-06	0.000506619	MSTRG.40325.5	1967	transmembrane protein putative [Medicago truncatula]/gi	Medtr1g060590.1_calmodulin-binding_family_protein_HC_chr1:26377825-26373830_20140818
156.748	1.03781	0.00164196	0.0408243	MSTRG.27167.23	2109	DUF674 family protein [Medicago truncatula]/gi	Medtr7g066340.1_DUF674_family_protein_LC_chr7:24146371-24144089_20140818
118.25	1.03717	8.2e-06	0.000874751	MSTRG.71229.4	2389	beta-amylase-like protein [Medicago truncatula]/gi	Medtr7g077410.1_beta-amylase-like_protein_HC_chr7:29234191-29227868_20140818
130.417	1.03639	3.41e-07	6.98e-05	183337_t	744	transcription factor bHLH107-like protein [Medicago truncatula]/gi	Medtr2g091190.1_transcription_factor_bHLH107-like_protein_HC_chr2:39333518-39331127_20140818
165.47	1.03552	0.00151963	0.0386081	MSTRG.76333.2	3400	disease resistance-like protein [Trifolium pratense]	Medtr6g076090.1_disease_resistance_protein_(TIR-NBS-LRR_class),_putative_LC_chr6:28098738-28094597_20140818
469.174	1.03533	3.03e-05	0.00239471	151709_t	2298	cobalamin-independent methionine synthase [Medicago truncatula]/gi	Medtr3g079640.1_cobalamin-independent_methionine_synthase_HC_chr3:35943580-35948815_20140818
83.5636	1.03523	0.00100426	0.0291734	MSTRG.11937.1	255	---NA---	---NA---
482.487	1.03488	1.85e-07	4.36e-05	MSTRG.38691.1	3281	hypothetical protein TSUD_93420 [Trifolium subterraneum]	Medtr1g070355.1_FAR1_DNA-binding_domain_protein_LC_chr1:31110429-31113072_20140818
96.1835	1.03435	0.00121987	0.0333247	MSTRG.32829.2	1558	isoaspartyl peptidase/L-asparaginase [Medicago truncatula]/gi	Medtr8g031580.1_isoaspartyl_peptidase/L-asparaginase_HC_chr8:11862175-11857170_20140818
127.256	1.03409	0.000122883	0.00669148	MSTRG.9879.5	2783	DNA repair helicase XPB1 [Medicago truncatula]/gi	Medtr8g098675.1_DNA_repair_helicase_XPB1_HC_chr8:41191751-41200265_20140818
4794.77	1.03375	0.000542871	0.0191796	MSTRG.2692.1	1117	legume lectin beta domain protein [Medicago truncatula]/gi	Medtr1g090973.1_legume_lectin_beta_domain_protein_HC_chr1:41088570-41090016_20140818
597.423	1.0336	0.000731909	0.0236522	153996_t	1440	E3 ubiquitin-protein ligase XBAT31-like protein partial [Medicago truncatula]/gi	Medtr4g021880.1_E3_ubiquitin-protein_ligase_XBAT31-like_protein_HC_chr4:7349291-7344609_20140818
73.1002	1.03248	0.000723861	0.0234509	MSTRG.41232.2	1522	PPR containing plant-like protein [Medicago truncatula]/gi	Medtr3g033040.2_PPR_containing_plant-like_protein_HC_chr3:10491879-10488531_20140818
335.781	1.03198	1.25e-05	0.00121201	MSTRG.36628.3	1926	hypothetical protein glysoja_001596 [Glycine soja]	Medtr2g078350.1_calcium-binding_EF-hand_protein_HC_chr2:32631917-32635869_20140818
77.1601	1.03198	0.000190487	0.00916762	6404_t	1068	reverse transcriptase family member [Glycine max]	Medtr2g013980.1_telomerase_activating_protein_Est1_HC_chr2:3860890-3866296_20140818
479.791	1.03186	0.000570345	0.0198738	MSTRG.10147.7	2747	cyclin-dependent kinase [Medicago truncatula]/gi	Medtr4g103810.1_cyclin-dependent_kinase_HC_chr4:42951676-42947980_20140818
156.407	1.03172	8.35e-05	0.00500969	127318_t	531	C2H2-type zinc finger protein [Medicago truncatula]/gi	Medtr7g023560.1_C2H2-type_zinc_finger_protein_HC_chr7:7688191-7687352_20140818
1589.9	1.03137	0.000656674	0.0219916	MSTRG.37415.5	1476	phospholipase A1 [Medicago truncatula]/gi	Medtr4g087830.1_phospholipase_A1_HC_chr4:34558798-34555984_20140818
83.2871	1.03136	0.00143244	0.0371299	MSTRG.62912.1	1019	COP9 signalosome complex subunit 1 [Medicago truncatula]/gi	Medtr7g076160.1_COP9_signalosome_complex_subunit_1_HC_chr7:28636048-28630667_20140818
303.31	1.03134	3.86e-05	0.00286024	MSTRG.67622.2	3173	RING/U-box protein putative [Medicago truncatula]/gi	Medtr2g084475.1_RING/U-box_protein,_putative_HC_chr2:35641571-35646787_20140818
232.132	1.03127	0.00127903	0.0343521	MSTRG.17589.2	1140	GDSL-like lipase/acylhydrolase [Medicago truncatula]/gi	Medtr7g068470.1_GDSL-like_lipase/acylhydrolase_HC_chr7:25074421-25070510_20140818
354.761	1.03122	3.13e-05	0.00245375	MSTRG.72412.5	2533	S-locus lectin kinase family protein [Medicago truncatula]/gi	Medtr0090s0020.1_S-locus_lectin_kinase_family_protein_HC_scaffold0090:10869-7455_20140818
297.519	1.03115	0.000208514	0.00979189	MSTRG.75571.1	1397	galactinol synthase [Medicago sativa]	Medtr1g084670.1_galactinol_synthase_HC_chr1:37697306-37699163_20140818
584.461	1.031	1.08e-05	0.00108467	192891_t	1308	stress up-regulated Nod 19 protein [Medicago truncatula]/gi	Medtr4g094548.1_stress_up-regulated_Nod_19_protein_HC_chr4:38215776-38212479_20140818
96.189	1.03026	7.82e-05	0.00478496	MSTRG.27799.5	926	---NA---	Medtr6g048910.1_albumin-2_protein_HC_chr6:17735756-17734527_20140818
528.3	1.03012	5.46e-05	0.00366241	154273_t	4539	indole-3-acetaldehyde oxidase [Medicago truncatula]/gi	Medtr5g087390.1_indole-3-acetaldehyde_oxidase_HC_chr5:37865280-37857588_20140818
743.801	1.02889	3.28e-09	1.42e-06	MSTRG.81122.2	1794	F-box protein PP2-A13 [Medicago truncatula]/gi	Medtr0002s0020.1_F-box_protein_PP2-A13_HC_scaffold0002:6674-10318_20140818
218.772	1.02781	0.0019921	0.0462906	MSTRG.46833.8	2116	pleiotropic drug resistance subfamily G protein [Medicago truncatula]/gi	Medtr5g070320.1_pleiotropic_drug_resistance_subfamily_G_protein_HC_chr5:29768959-29781810_20140818
85.9237	1.0275	0.000260613	0.0114575	MSTRG.3653.1	486	cation transporter ChaC [Medicago truncatula]/gi	Medtr3g109250.1_cation_transporter_ChaC_HC_chr3:50503099-50500528_20140818
1828.48	1.02718	7.1e-06	0.000782203	MSTRG.32696.4	724	unknown [Medicago truncatula]/gi	Medtr7g065130.1_hypothetical_protein_HC_chr7:23733151-23734236_20140818
83.9706	1.02701	0.000140955	0.00736988	MSTRG.47263.1	1851	RNA pseudouridine synthase [Medicago truncatula]/gi	Medtr7g029385.1_RNA_pseudouridine_synthase_HC_chr7:10453073-10460793_20140818
1006.25	1.02628	0.000739926	0.023773	MSTRG.63373.2	1605	class I glutamine amidotransferase [Medicago truncatula]/gi	Medtr6g004280.1_class_I_glutamine_amidotransferase_HC_chr6:218503-220686_20140818
185.621	1.02547	0.00148659	0.0381112	MSTRG.45787.2	1709	ATP binding protein partial [Trifolium pratense]	Medtr4g123730.1_kinesin_motor_domain_protein_HC_chr4:50983207-50995376_20140818
149.084	1.02528	0.00104552	0.0300087	MSTRG.81613.2	2336	dishevelled/Egl-10/leckstrin domain protein [Medicago truncatula]/gi	Medtr8g033290.1_dishevelled/Egl-10/leckstrin_domain_protein_HC_chr8:12828653-12835651_20140818
600.85	1.02523	0.000108594	0.00608256	74114_t	4584	RNA-directed DNA polymerase [Dendrobium catenatum]	Medtr6g045307.1_IPP_transferase_LC_chr6:16235075-16228160_20140818
152.191	1.02494	2.96e-05	0.00235282	MSTRG.85233.2	1365	---NA---	---NA---
209.337	1.02491	6.02e-05	0.00393438	MSTRG.72412.2	2724	S-locus lectin kinase family protein [Medicago truncatula]/gi	Medtr0090s0020.3_S-locus_lectin_kinase_family_protein_HC_scaffold0090:10869-7455_20140818
78.296	1.0237	0.000438858	0.0165872	MSTRG.39992.2	451	glycyl-tRNA synthetase/glycine-tRNA ligase [Medicago truncatula]/gi	Medtr7g406850.1_glycyl-tRNA_synthetase/glycine-tRNA_ligase_HC_chr7:942169-936679_20140818
1007.27	1.02336	7.56e-06	0.000820121	MSTRG.27037.3	813	---NA---	---NA---
97.3466	1.0233	4.76e-05	0.00332666	MSTRG.70002.2	1803	tryptophan-tRNA ligase [Medicago truncatula]/gi	Medtr3g110360.1_tryptophan-tRNA_ligase_HC_chr3:51509628-51521811_20140818
63.445	1.02324	0.000496864	0.0180312	MSTRG.67622.7	3145	RING/U-box protein putative [Medicago truncatula]/gi	Medtr2g084475.1_RING/U-box_protein,_putative_HC_chr2:35641571-35646787_20140818
105.625	1.02234	0.000492604	0.0179433	MSTRG.11869.4	1029	hypothetical protein MTR_8g064370 [Medicago truncatula]/gi	Medtr8g064370.1_hypothetical_protein_LC_chr8:26990933-26995034_20140818
857.77	1.02217	4e-07	8.01e-05	MSTRG.85283.1	365	---NA---	---NA---
76.5349	1.02208	0.00167251	0.0412754	17945_t	2721	hypothetical protein TSUD_330720 [Trifolium subterraneum]	Medtr7g090775.1_hypothetical_protein_HC_chr7:35756717-35755199_20140818
214.075	1.02194	0.000815629	0.0253427	161463_t	1005	D-isomer specific 2-hydroxyacid dehydrogenase domain protein [Medicago truncatula]/gi	Medtr8g033400.1_D-isomer_specific_2-hydroxyacid_dehydrogenase_domain_protein_HC_chr8:12886877-12885180_20140818
120.623	1.02183	0.000682485	0.0225778	MSTRG.83519.3	2890	disease resistance protein rga3-like [Trifolium pratense]	Medtr5g035280.1_NB-ARC_domain_disease_resistance_protein_LC_chr5:15348602-15344286_20140818
143.969	1.02057	0.00187379	0.0444618	MSTRG.7020.2	1615	hypothetical protein MTR_4g115690 [Medicago truncatula]/gi	Medtr4g115690.1_hypothetical_protein_HC_chr4:47810138-47811531_20140818
307.766	1.01984	7.95e-07	0.000139641	MSTRG.69867.3	2027	transmembrane amino acid transporter family protein [Medicago truncatula]/gi	Medtr5g083760.1_transmembrane_amino_acid_transporter_family_protein_HC_chr5:36131798-36134727_20140818
831.473	1.01971	0.000222013	0.0102365	MSTRG.72724.1	476	unknown [Medicago truncatula]/gi	Medtr3g092600.1_60S_acidic_ribosomal_protein_HC_chr3:42321505-42319755_20140818
357.099	1.01903	2.02e-06	0.000294106	MSTRG.38691.3	2760	hypothetical protein TSUD_93420 [Trifolium subterraneum]	Medtr1g070355.1_FAR1_DNA-binding_domain_protein_LC_chr1:31110429-31113072_20140818
137.467	1.01876	0.000114333	0.00631694	132434_t	1728	Ulp1 protease family carboxy-terminal domain protein [Medicago truncatula]/gi	Medtr7g046380.1_Ulp1_protease_family,_carboxy-terminal_domain_protein_HC_chr7:16432801-16434835_20140818
4777.02	1.01866	0.000847776	0.0260645	MSTRG.34131.3	3058	galactinol-raffinose galactosyltransferase [Medicago truncatula]/gi	Medtr7g091880.1_galactinol-raffinose_galactosyltransferase_HC_chr7:36372945-36367215_20140818
164.269	1.0163	0.00111613	0.031359	MSTRG.242.1	2951	histone-lysine N-methyltransferase [Medicago truncatula]/gi	Medtr7g109560.1_histone-lysine_N-methyltransferase_LC_chr7:44831064-44824669_20140818
93.9544	1.01602	0.00174823	0.0424914	MSTRG.51143.3	1425	MYB-like transcription factor family protein [Medicago truncatula]/gi	Medtr8g086410.2_MYB-like_transcription_factor_family_protein_HC_chr8:35847826-35851675_20140818
362.84	1.01588	2.71e-07	5.9e-05	MSTRG.39281.6	1777	transcription initiation factor TFIIE beta subunit [Medicago truncatula]/gi	Medtr5g010620.1_transcription_initiation_factor_TFIIE,_beta_subunit_HC_chr5:2882352-2877534_20140818
135.523	1.01552	9.65e-06	0.000993415	47891_t	1164	serine/threonine phosphatase family 2C domain protein [Medicago truncatula]/gi	Medtr0015s0140.1_serine/threonine_phosphatase_family,_2C_domain_protein_HC_scaffold0015:74393-69714_20140818
853.163	1.01518	0.000912972	0.0273281	MSTRG.18495.1	2975	cobalamin-independent methionine synthase [Medicago truncatula]/gi	Medtr3g079640.1_cobalamin-independent_methionine_synthase_HC_chr3:35943580-35948815_20140818
212.009	1.01403	0.000112861	0.0062624	MSTRG.58916.8	1363	haloacid dehalogenase-like hydrolase domain protein [Medicago truncatula]/gi	Medtr2g035440.1_haloacid_dehalogenase-like_hydrolase_domain_protein_HC_chr2:15123182-15118946_20140818
126.453	1.01308	0.00145838	0.0375931	MSTRG.65869.4	1571	hypothetical protein TSUD_330940 [Trifolium subterraneum]	Medtr8g090105.1_tRNA-splicing_endonuclease_subunit_sen54_amino-terminal_protein_HC_chr8:37741275-37738113_20140818
96.1843	1.01194	0.00045004	0.016874	29489_t	1599	F-box protein interaction domain protein [Medicago truncatula]/gi	Medtr2g029990.1_F-box_protein_interaction_domain_protein_HC_chr2:11236669-11238596_20140818
153.111	1.01171	0.00014169	0.00739338	MSTRG.8215.2	1832	Ulp1 protease family carboxy-terminal domain protein [Medicago truncatula]/gi	Medtr7g046380.1_Ulp1_protease_family,_carboxy-terminal_domain_protein_HC_chr7:16432801-16434835_20140818
103.16	1.01091	0.00119899	0.0329363	MSTRG.39388.3	1110	FAD-dependent oxidoreductase [Medicago truncatula]/gi	Medtr7g051240.1_FAD-dependent_oxidoreductase_HC_chr7:17945735-17939463_20140818
261.375	1.01085	0.000242687	0.0109137	145510_t	603	lactoylglutathione lyase/glyoxalase I family protein [Medicago truncatula]/gi	Medtr4g011020.1_lactoylglutathione_lyase/glyoxalase_I_family_protein_HC_chr4:2571660-2573651_20140818
604.762	1.00978	0.00024786	0.0110724	MSTRG.11616.1	1074	unknown [Medicago truncatula]	Medtr5g041095.1_ribonuclease_T2_family_protein_LC_chr5:18051970-18053262_20140818
194.415	1.00967	9.6e-05	0.00553829	173930_t	1533	sugar porter (SP) family MFS transporter [Medicago truncatula]/gi	Medtr3g008170.1_sugar_porter_(SP)_family_MFS_transporter_HC_chr3:1355011-1357152_20140818
230.73	1.00841	0.000208038	0.00978777	17115_t	615	unknown partial [Medicago truncatula]	Medtr3g112020.1_gamma_carbonic_anhydrase-like_protein_HC_chr3:52412286-52417563_20140818
1493.79	1.00822	1.99e-06	0.000290483	MSTRG.37596.28	2835	PREDICTED: subtilisin-like protease Glyma18g48580 [Cicer arietinum]	Medtr7g081500.1_subtilisin-like_serine_protease_HC_chr7:31114135-31106020_20140818
236.161	1.00801	0.000540656	0.0191276	MSTRG.63173.11	3374	NB-ARC domain disease resistance protein [Medicago truncatula]/gi	Medtr3g466620.1_NB-ARC_domain_disease_resistance_protein_LC_chr3:27403732-27400482_20140818
612.764	1.00771	0.00101827	0.0294863	MSTRG.10147.3	2618	cyclin-dependent kinase [Medicago truncatula]/gi	Medtr4g103810.1_cyclin-dependent_kinase_HC_chr4:42951676-42947980_20140818
90.988	1.00707	0.00125902	0.0340165	155205_t	2898	STE family kinase domain protein [Medicago truncatula]/gi	Medtr4g005730.3_STE_family_kinase_domain_protein_HC_chr4:325118-335383_20140818
839.329	1.00479	2.97e-07	6.32e-05	MSTRG.21686.1	1784	stress up-regulated Nod 19 protein [Medicago truncatula]/gi	Medtr4g094548.1_stress_up-regulated_Nod_19_protein_HC_chr4:38215776-38212479_20140818
657.408	1.00411	3.19e-05	0.00249478	91871_t	2298	cobalamin-independent methionine synthase [Medicago truncatula]/gi	Medtr3g079640.1_cobalamin-independent_methionine_synthase_HC_chr3:35943580-35948815_20140818
1840.05	1.00043	1.97e-07	4.57e-05	MSTRG.4870.7	893	glutathione S-transferase [Medicago truncatula]/gi	Medtr7g065260.1_glutathione_S-transferase_HC_chr7:23798295-23796391_20140818
446.031	1.00036	8.74e-06	0.000920566	MSTRG.32696.3	260	unknown [Medicago truncatula]/gi	Medtr7g065130.1_hypothetical_protein_HC_chr7:23733151-23734236_20140818
92.0949	-1.00354	0.000160423	0.00807966	MSTRG.65984.8	2139	hypothetical protein TSUD_325030 [Trifolium subterraneum]	Medtr4g082160.1_GRF_zinc_finger_protein_HC_chr4:31906396-31905924_20140818
94.4091	-1.00358	0.0015026	0.0383297	MSTRG.64205.9	1464	AT-rich interactive domain protein [Medicago truncatula]/gi	Medtr5g024920.2_AT-rich_interactive_domain_protein_HC_chr5:10083078-10075472_20140818
65.103	-1.00458	0.0018496	0.0441447	MSTRG.85768.1	1569	F-box protein interaction domain protein [Medicago truncatula]/gi	Medtr3g010920.1_F-box_protein_interaction_domain_protein_LC_chr3:2645283-2644135_20140818
349.559	-1.00466	0.00179063	0.0432168	MSTRG.51161.3	1245	ABC transporter I family protein [Medicago truncatula]/gi	Medtr1g084720.1_ABC_transporter_I_family_protein_HC_chr1:37711246-37714842_20140818
526.022	-1.00605	0.000899248	0.0270616	MSTRG.81885.2	1432	hypothetical protein MTR_0055s0130 [Medicago truncatula]/gi	Medtr0055s0130.1_hypothetical_protein_HC_scaffold0055:73353-68450_20140818
126.892	-1.00706	0.000423314	0.0162414	MSTRG.18365.1	1434	salt stress response/antifungal domain protein [Medicago truncatula]/gi	Medtr3g065370.1_salt_stress_response/antifungal_domain_protein_HC_chr3:29527120-29531148_20140818
228.944	-1.00975	2.87e-05	0.0023054	102560_t	1281	PREDICTED: putative pentatricopeptide repeat-containing protein At1g16830 [Cicer arietinum]/gi	Medtr7g025610.1_PPR_containing_plant-like_protein,_putative_HC_chr7:8534854-8532764_20140818
392.9	-1.01048	0.000396546	0.0155253	MSTRG.55916.1	1556	pectinesterase/pectinesterase inhibitor [Medicago truncatula]/gi	Medtr4g087980.1_pectinesterase/pectinesterase_inhibitor_HC_chr4:51523690-51527098_20140818
132.207	-1.01075	6.07e-05	0.00395781	MSTRG.24513.8	1729	RNA-binding (RRM/RBD/RNP motif) family protein [Medicago truncatula]/gi	Medtr5g023060.2_RNA-binding_(RRM/RBD/RNP_motif)_family_protein_HC_chr5:9164769-9166628_20140818
89.0357	-1.01123	0.00186807	0.0443736	MSTRG.10054.3	1831	receptor-like kinase [Medicago truncatula]/gi	Medtr7g082430.1_receptor-like_kinase_HC_chr7:31597761-31594490_20140818
472.309	-1.01161	0.000363093	0.0146183	MSTRG.23399.33	864	hypothetical protein MTR_1g099150 [Medicago truncatula]/gi	Medtr1g099150.1_hypothetical_protein_LC_chr1:44729271-44727107_20140818
117.137	-1.01283	0.000753982	0.0240767	MSTRG.10359.1	1900	glycylpeptide N-tetradecanoyltransferase [Medicago truncatula]/gi	Medtr2g040010.1_glycylpeptide_N-tetradecanoyltransferase_HC_chr2:17554131-17552516_20140818
187.984	-1.01325	7.36e-05	0.00457381	MSTRG.65578.7	1832	serine/threonine-protein phosphatase [Medicago truncatula]/gi	Medtr3g452710.2_serine/threonine-protein_phosphatase_HC_chr3:19308578-19320884_20140818
4791.43	-1.01475	3.72e-05	0.00278316	MSTRG.67217.2	1262	caffeic acid O-methyltransferase [Medicago truncatula]/gi	Medtr5g098170.1_caffeic_acid_O-methyltransferase_HC_chr5:42999016-43002936_20140818
586.058	-1.01528	0.000281595	0.0121519	MSTRG.16182.1	3261	sphingoid long-chain bases kinase-like protein [Medicago truncatula]/gi	Medtr6g004070.1_sphingoid_long-chain_bases_kinase-like_protein_HC_chr6:102237-110525_20140818
509.723	-1.01768	5.56e-05	0.00371603	MSTRG.13071.2	3026	hypothetical protein TSUD_328240 [Trifolium subterraneum]	Medtr7g087047.1_zinc_finger_(Ran-binding)_family_protein_HC_chr7:33870448-33877120_20140818
144.624	-1.01853	0.000576971	0.0200371	61653_t	423	transmembrane protein putative [Medicago truncatula]/gi	Medtr4g084970.1_transmembrane_protein,_putative_HC_chr4:33179387-33178576_20140818
482.937	-1.01912	2.87e-05	0.00230647	MSTRG.82226.1	1892	COP9 signalosome complex subunit 1 [Medicago truncatula]/gi	Medtr8g432630.1_COP9_signalosome_complex_subunit_1_HC_chr8:12373860-12369630_20140818
165.065	-1.02045	0.000220781	0.0102132	103753_t	2145	starch synthase 2/amyloplastic protein [Medicago truncatula]/gi	Medtr3g091570.1_starch_synthase_2/amyloplastic_protein_HC_chr3:41674619-41682385_20140818
155.14	-1.0205	0.000235943	0.0106973	MSTRG.7718.5	1178	PCF11P-related protein [Medicago truncatula]/gi	Medtr6g011450.2_PCF11P-related_protein_HC_chr6:3248562-3252804_20140818
1416.54	-1.02148	0.000430296	0.016387	MSTRG.14738.7	2587	hypothetical protein MTR_6g033455 [Medicago truncatula]/gi	Medtr6g033455.1_hypothetical_protein_LC_chr6:10800828-10801839_20140818
79.8353	-1.02176	0.000246873	0.0110442	157665_t	1362	transducin/WD40 repeat protein [Medicago truncatula]/gi	Medtr3g010010.2_transducin/WD40_repeat_protein_HC_chr3:2265718-2260475_20140818
269.056	-1.02259	4.53e-05	0.00320791	MSTRG.24788.1	578	plant/F20B17-9 protein [Medicago truncatula]/gi	Medtr2g010880.1_plant/F20B17-9_protein_HC_chr2:2569263-2571086_20140818
139.637	-1.02267	0.00177469	0.0429928	MSTRG.87181.1	644	unknown [Glycine max]	---NA---
147.791	-1.02286	0.000128579	0.00691037	192417_t	993	ribonucleoside-diphosphate reductase small chain [Medicago truncatula]/gi	Medtr0268s0080.1_ribonucleoside-diphosphate_reductase_small_chain_HC_scaffold0268:22239-23602_20140818
154.339	-1.02304	7.12e-05	0.00445788	124086_t	2646	aspartokinase-homoserine dehydrogenase [Medicago truncatula]/gi	Medtr3g084500.1_aspartokinase-homoserine_dehydrogenase_HC_chr3:38146841-38154435_20140818
107.13	-1.02328	5.07e-05	0.00347854	MSTRG.36333.5	447	unknown [Medicago truncatula]	---NA---
458.305	-1.0234	9.84e-05	0.00565005	MSTRG.72449.7	2362	kinesin motor catalytic domain protein [Medicago truncatula]/gi	Medtr2g010760.1_kinesin_motor_catalytic_domain_protein_HC_chr2:2516525-2509682_20140818
186.32	-1.02343	0.00182069	0.0437309	131458_t	2886	LRR and NB-ARC domain disease resistance protein [Medicago truncatula]/gi	Medtr3g056200.1_LRR_and_NB-ARC_domain_disease_resistance_protein_LC_chr3:22368944-22360746_20140818
73.9286	-1.02429	0.000297102	0.0126242	MSTRG.50420.1	878	RNA pseudouridine synthase [Medicago truncatula]/gi	Medtr5g004910.2_RNA_pseudouridine_synthase_HC_chr5:186052-183651_20140818
116.976	-1.02483	0.000667024	0.0222248	MSTRG.81172.3	1593	oxidoreductase family NAD-binding rossmann fold protein [Medicago truncatula]/gi	Medtr2g098500.1_oxidoreductase_family,_NAD-binding_rossmann_fold_protein_HC_chr2:42140224-42134720_20140818
103.368	-1.02538	0.00114613	0.0319716	MSTRG.48721.4	1307	transducin/WD-like repeat-protein [Medicago truncatula]/gi	Medtr3g061450.1_transducin/WD-like_repeat-protein_HC_chr3:24506567-24498548_20140818
85.9489	-1.03027	0.000450975	0.0169003	MSTRG.33810.2	848	50S ribosomal protein L18 family protein [Medicago truncatula]/gi	Medtr4g032660.1_50S_ribosomal_protein_L18_family_protein_HC_chr4:11256027-11260142_20140818
229.749	-1.0307	0.000196833	0.00940005	MSTRG.29858.4	5883	disease resistance protein (TIR-NBS-LRR class) [Medicago truncatula]/gi	Medtr4g020640.2_disease_resistance_protein_(TIR-NBS-LRR_class)_LC_chr4:6628037-6619333_20140818
393.872	-1.03281	0.00028994	0.0123946	22634_t	651	Ribosomal protein S30 [Cynara cardunculus var. scolymus]	Medtr5g012610.1_40S_ribosomal_S30-like_protein_HC_chr5:3820348-3819488_20140818
269.367	-1.033	0.000814407	0.0253251	180425_t	498	unknown [Medicago truncatula]	Medtr5g022130.1_chaperone_protein_DnaJ_11_HC_chr5:8695523-8696738_20140818
526.574	-1.03359	0.00190546	0.0449928	MSTRG.61451.1	1164	40S ribosomal protein s17 [Trifolium pratense]	Medtr1g058250.1_40S_ribosomal_protein_S17_HC_chr1:25639291-25638257_20140818
117.459	-1.03387	0.00011948	0.00654994	MSTRG.77817.1	2798	elongation factor 1-alpha [Medicago truncatula]/gi	Medtr1g101870.1_elongation_factor_1-alpha_LC_chr1:45981685-45990868_20140818
114.442	-1.03394	0.00195016	0.0456724	96661_t	5295	LRR and NB-ARC domain disease resistance protein [Medicago truncatula]/gi	Medtr3g467340.1_LRR_and_NB-ARC_domain_disease_resistance_protein_LC_chr3:27771113-27774205_20140818
618.211	-1.03493	7.21e-08	2e-05	MSTRG.24017.3	1062	---NA---	---NA---
1048.38	-1.03595	4.03e-06	0.000503819	MSTRG.78160.2	433	hypothetical protein TanjilG_12081 [Lupinus angustifolius]	Medtr3g035650.1_hypothetical_protein_HC_chr3:13224829-13225255_20140818
110.409	-1.03628	0.000427839	0.0163356	54119_t	375	INO80 complex subunit C [Medicago truncatula]/gi	Medtr3g082190.1_INO80_complex_subunit_C_HC_chr3:37103423-37100714_20140818
152.51	-1.0363	0.000212518	0.00992874	MSTRG.70012.3	709	Enod93 protein [Medicago sativa subsp. x varia]	Medtr3g110390.1_early_nodulin_93_HC_chr3:51579779-51577895_20140818
147.972	-1.03665	0.00162879	0.0405571	MSTRG.74675.2	456	NBS-LRR protein [Cicer arietinum]	Medtr1g047870.1_NB-ARC_domain_disease_resistance_protein_LC_chr1:18118165-18116271_20140818
322.07	-1.03777	0.00193497	0.0454126	MSTRG.51161.1	1392	ABC transporter I family protein [Medicago truncatula]/gi	Medtr1g084720.1_ABC_transporter_I_family_protein_HC_chr1:37711246-37714842_20140818
305.694	-1.03784	0.000176871	0.00868499	MSTRG.43497.1	781	unknown [Medicago truncatula]/gi	Medtr3g046320.1_60S_ribosomal_protein_L18a-3_HC_chr3:15289143-15298145_20140818
127.684	-1.03822	0.000351821	0.0142982	MSTRG.37124.5	1026	methyltransferase PMT14-like protein putative [Medicago truncatula]/gi	Medtr4g098890.1_methyltransferase_PMT14-like_protein,_putative_LC_chr4:40830508-40819672_20140818
1141.05	-1.03929	2.91e-06	0.000393344	MSTRG.65313.5	1886	actin-related protein 4A [Medicago truncatula]/gi	Medtr3g095530.1_actin-related_protein_4A_HC_chr3:43649404-43646240_20140818
402.743	-1.03951	9.34e-06	0.000972706	151711_t	2337	cobalamin-independent methionine synthase [Medicago truncatula]/gi	Medtr3g079640.1_cobalamin-independent_methionine_synthase_HC_chr3:35943580-35948815_20140818
78.3856	-1.03994	0.000497998	0.0180428	55867_t	5379	mediator of RNA polymerase II transcription subunit 14 [Medicago truncatula]/gi	Medtr1g087060.1_mediator_of_RNA_polymerase_II_transcription_subunit_14_HC_chr1:38977910-38970008_20140818
58.4694	-1.04006	0.00166203	0.0411712	46148_t	1188	F-box and associated interaction domain protein [Medicago truncatula]/gi	Medtr2g028140.1_F-box_and_associated_interaction_domain_protein_LC_chr2:10354274-10351121_20140818
108.063	-1.0405	0.000884925	0.0267605	MSTRG.1108.1	1383	---NA---	---NA---
597.506	-1.04128	0.000546697	0.0192752	MSTRG.28525.1	1446	---NA---	Medtr3g080765.1_hypothetical_protein_HC_chr3:36552850-36553915_20140818
65.3999	-1.04214	0.000625785	0.0212838	MSTRG.19928.4	803	proteasome subunit alpha type-4 [Dorcoceras hygrometricum]	Medtr7g070070.1_20S_proteasome_subunit_alpha_HC_chr7:25826277-25825525_20140818
381.566	-1.04224	0.00025727	0.0113584	104838_t	1272	pectinesterase/pectinesterase inhibitor [Medicago truncatula]/gi	Medtr4g087980.1_pectinesterase/pectinesterase_inhibitor_HC_chr4:51523690-51527098_20140818
115.109	-1.04264	9.58e-05	0.00553208	130884_t	1815	F-box plant-like protein [Medicago truncatula]/gi	Medtr2g007220.1_F-box_plant-like_protein_HC_chr2:870653-867454_20140818
259.033	-1.04327	1.12e-06	0.000186306	MSTRG.17878.6	2480	casein kinase I-like protein [Medicago truncatula]/gi	Medtr6g087070.1_casein_kinase_I-like_protein_HC_chr6:33472829-33478953_20140818
851.759	-1.04329	8.05e-05	0.00488116	MSTRG.75542.2	1185	prolyl 4-hydroxylase subunit alpha-like protein [Medicago truncatula]/gi	Medtr4g118560.1_prolyl_4-hydroxylase_subunit_alpha-like_protein_HC_chr4:49096498-49099546_20140818
175.879	-1.04382	0.000421713	0.0162035	60429_t	1914	vacuolar import/degradation VID27-like protein [Medicago truncatula]/gi	Medtr3g101680.1_vacuolar_import/degradation,_VID27-like_protein_HC_chr3:46814722-46811217_20140818
908.721	-1.04403	5.38e-05	0.00363009	MSTRG.75542.1	1306	prolyl 4-hydroxylase subunit alpha-like protein [Medicago truncatula]/gi	Medtr4g118560.1_prolyl_4-hydroxylase_subunit_alpha-like_protein_HC_chr4:49096498-49099546_20140818
195.565	-1.04434	0.000102931	0.00584733	MSTRG.7718.2	2481	polyadenylation and cleavage factor 11-like protein [Trifolium pratense]	Medtr6g011450.2_PCF11P-related_protein_HC_chr6:3248562-3252804_20140818
155.318	-1.04441	0.00124667	0.0338074	MSTRG.54479.3	1589	transmembrane protein putative [Medicago truncatula]/gi	Medtr8g076840.2_transmembrane_protein,_putative_chr8:32597242-32589333_20140818
173.914	-1.04457	0.00122543	0.0334059	MSTRG.26319.1	719	O-glycosyl hydrolase family 17 protein [Medicago truncatula]/gi	Medtr4g083500.1_O-glycosyl_hydrolase_family_17_protein_HC_chr4:32605251-32608276_20140818
283.572	-1.04484	5.5e-07	0.000103633	MSTRG.51307.2	645	hypothetical protein MTR_7g012940 [Medicago truncatula]/gi	Medtr7g012940.1_hypothetical_protein_HC_chr7:3661702-3659291_20140818
85.029	-1.04527	0.000654688	0.0219475	MSTRG.46768.4	1339	hypothetical protein MTR_4g092510 [Medicago truncatula]/gi	Medtr4g092510.1_hypothetical_protein_LC_chr4:36666895-36663979_20140818
203.081	-1.04696	0.00142885	0.0370726	MSTRG.70525.2	1059	sulfite exporter TauE/SafE family protein [Medicago truncatula]/gi	Medtr1g026910.2_sulfite_exporter_TauE/SafE_family_protein_HC_chr1:8844393-8840386_20140818
145.814	-1.04943	0.00160656	0.0401405	MSTRG.74675.3	519	PREDICTED: putative disease resistance protein RGA4 [Cicer arietinum]	Medtr1g047870.1_NB-ARC_domain_disease_resistance_protein_LC_chr1:18118165-18116271_20140818
52.484	-1.04943	0.000791856	0.0248835	62914_t	666	unknown [Medicago truncatula]	Medtr6g060390.1_DUF1442_family_protein_HC_chr6:20750761-20749382_20140818
444.835	-1.04983	7.77e-05	0.00475807	MSTRG.78342.1	3802	SWI/SNF complex subunit SWI3D [Medicago truncatula]/gi	Medtr4g069830.1_SWI/SNF_complex_subunit_SWI3D_HC_chr4:26258593-26267090_20140818
3297.61	-1.05141	5.36e-05	0.00361991	MSTRG.34951.2	640	hypothetical protein LSAT_9X35301 [Lactuca sativa]	Medtr8g040260.1_hypothetical_protein_HC_chr8:15005757-15006760_20140818
171.178	-1.05169	0.000347205	0.0141515	MSTRG.23344.1	773	plant invertase/pectin methylesterase inhibitor [Medicago truncatula]/gi	Medtr3g008820.1_plant_invertase/pectin_methylesterase_inhibitor_HC_chr3:1665767-1664928_20140818
346.819	-1.05203	0.000127818	0.00688519	MSTRG.56915.4	4487	endonuclease/exonuclease/phosphatase family protein partial [Trifolium pratense]	Medtr6g034215.1_endonuclease/exonuclease/phosphatase_family_protein_LC_chr6:11609511-11608478_20140818
102.149	-1.0526	0.00140292	0.0366084	MSTRG.17023.5	1935	hypothetical protein MTR_1g075280 [Medicago truncatula]/gi	Medtr1g075280.1_hypothetical_protein_HC_chr1:33320925-33315855_20140818
129.658	-1.05285	1.55e-05	0.00143658	MSTRG.37761.4	1939	RNA-dependent RNA polymerase family protein [Medicago truncatula]/gi	Medtr6g088660.1_RNA-dependent_RNA_polymerase_family_protein_HC_chr6:33756998-33772645_20140818
278.832	-1.05302	0.00143196	0.0371285	MSTRG.29708.1	409	YGL010w-like protein [Medicago truncatula]/gi	Medtr3g435170.1_YGL010w-like_protein_HC_chr3:11473247-11469387_20140818
61.9838	-1.05347	0.00111873	0.0313979	MSTRG.61749.1	974	tRNA-dihydrouridine synthase [Medicago truncatula]/gi	Medtr8g067420.1_tRNA-dihydrouridine_synthase_HC_chr8:28151579-28145915_20140818
363.215	-1.05363	0.000424528	0.0162604	77460_t	318	succinate dehydrogenase [ubiquinone] iron-sulfur subunit [Medicago truncatula]/gi	Medtr1g492610.1_succinate_dehydrogenase_[ubiquinone]_iron-sulfur_subunit_HC_chr1:41503746-41508477_20140818
810.362	-1.05418	0.000470719	0.0173962	MSTRG.73027.1	2542	alanine-glyoxylate aminotransferase-like protein [Medicago truncatula]/gi	Medtr7g072420.1_alanine-glyoxylate_aminotransferase-like_protein_HC_chr7:26902387-26894982_20140818
142.728	-1.05442	0.000989785	0.0288938	MSTRG.29478.1	1452	unknown [Medicago truncatula]/gi	Medtr3g058630.1_ZIP_metal_ion_transporter_family_protein_HC_chr3:23327093-23324436_20140818
6288.79	-1.05453	2.76e-05	0.00223372	MSTRG.24742.1	1614	caffeic acid O-methyltransferase [Medicago truncatula]/gi	Medtr5g098170.1_caffeic_acid_O-methyltransferase_HC_chr5:42999016-43002936_20140818
133.905	-1.05567	0.00207564	0.0476106	140512_t	4545	myosin family XI heavy chain [Medicago truncatula]/gi	Medtr3g105200.1_myosin_family_XI_heavy_chain_HC_chr3:48492131-48512712_20140818
271.112	-1.05623	0.000208247	0.00978777	MSTRG.9400.1	1945	DUF829 domain protein [Medicago truncatula]/gi	Medtr3g101490.1_DUF829_domain_protein_HC_chr3:46712329-46716698_20140818
93.4536	-1.05649	0.000560873	0.0196276	MSTRG.37761.5	1717	RNA-dependent RNA polymerase family protein [Medicago truncatula]/gi	Medtr6g088660.1_RNA-dependent_RNA_polymerase_family_protein_HC_chr6:33756998-33772645_20140818
295.681	-1.05744	2.2e-05	0.00186964	MSTRG.22531.2	1341	ATRER1A-like protein [Medicago truncatula]/gi	Medtr5g016560.1_ATRER1A-like_protein_HC_chr5:5950897-5953021_20140818
201.49	-1.05799	0.000969419	0.0285413	156655_t	1344	pyruvate kinase family protein [Medicago truncatula]/gi	Medtr1g091040.1_pyruvate_kinase_family_protein_HC_chr1:41179269-41173862_20140818
5438.19	-1.05878	8.76e-05	0.00517391	MSTRG.58895.17	772	hypothetical protein PHAVU_009G211300g partial [Phaseolus vulgaris]/gi	---NA---
92.2824	-1.05899	0.000473062	0.0174341	MSTRG.39011.7	1263	PREDICTED: uncharacterized protein LOC105852030 [Cicer arietinum]	Medtr2g017975.1_hypothetical_protein_HC_chr2:5597457-5595031_20140818
145.305	-1.05913	0.00192804	0.0453325	MSTRG.42063.8	4718	LRR and NB-ARC domain disease resistance protein [Medicago truncatula]/gi	Medtr3g034380.1_LRR_and_NB-ARC_domain_disease_resistance_protein_LC_chr3:11131865-11126896_20140818
3233.11	-1.06066	2.38e-06	0.000336526	MSTRG.69893.2	2558	hypothetical protein DCAR_001146 [Daucus carota subsp. sativus]	Medtr8g040260.1_hypothetical_protein_HC_chr8:15005757-15006760_20140818
99.7192	-1.06107	0.0012467	0.0338074	16129_t	1074	unknown [Medicago truncatula]/gi	Medtr3g029640.1_F-box_SKIP23-like_protein_LC_chr3:9337600-9334357_20140818
107.447	-1.06205	0.00057295	0.0199431	MSTRG.17455.11	683	hypothetical protein MTR_3g114110 [Medicago truncatula]/gi	Medtr3g114110.1_hypothetical_protein_LC_chr3:53284633-53288572_20140818
931.18	-1.06316	0.000380113	0.0150817	MSTRG.62647.1	610	hypothetical protein TSUD_205490 partial [Trifolium subterraneum]	Medtr5g084060.2_protein_transporter_Sec61_subunit_gamma-like_protein_HC_chr5:36280934-36278662_20140818
460.998	-1.06357	0.0015173	0.0385792	MSTRG.62188.2	782	cinnamyl alcohol dehydrogenase-like protein [Medicago truncatula]/gi	Medtr5g031310.1_cinnamyl_alcohol_dehydrogenase-like_protein_HC_chr5:13427387-13425357_20140818
134.773	-1.06401	0.000122178	0.00666805	MSTRG.80665.2	4178	LRR and NB-ARC domain disease resistance protein [Medicago truncatula]/gi	Medtr3g467340.1_LRR_and_NB-ARC_domain_disease_resistance_protein_LC_chr3:27771113-27774205_20140818
125.839	-1.0645	0.000398219	0.0155711	MSTRG.52087.6	2681	PPR containing plant protein [Medicago truncatula]/gi	Medtr1g037260.1_PPR_containing_plant_protein_HC_chr1:13702972-13699671_20140818
80.9873	-1.06618	0.000293075	0.0124942	MSTRG.61934.4	1801	zinc knuckle (CCHC-type) family protein [Medicago truncatula]/gi	Medtr2g040410.1_zinc_knuckle_(CCHC-type)_family_protein_LC_chr2:17736264-17729542_20140818
84.1183	-1.06673	0.00110902	0.0312328	75014_t	954	DUF4408 domain protein [Medicago truncatula]/gi	Medtr6g080650.1_DUF4408_domain_protein_LC_chr6:29000923-29003973_20140818
2452.3	-1.06968	6.44e-08	1.84e-05	MSTRG.33941.2	668	hypothetical protein GOBAR_AA14875 [Gossypium barbadense]	Medtr3g106310.1_60S_ribosomal_protein_L39-3_HC_chr3:49118161-49118875_20140818
47.1593	-1.07198	0.00119882	0.0329363	MSTRG.62864.13	4283	WD-40 repeat protein/beige protein [Medicago truncatula]/gi	Medtr7g075660.1_WD-40_repeat_protein/beige_protein_HC_chr7:28381508-28350580_20140818
507.343	-1.07207	0.00034098	0.0139934	MSTRG.62089.12	2467	vacuolar protein sorting protein [Medicago truncatula]/gi	Medtr5g013780.1_vacuolar_protein_sorting_protein_HC_chr5:4444545-4498541_20140818
5291.46	-1.0741	5.67e-06	0.00066107	MSTRG.52912.3	1274	hypothetical protein TanjilG_12081 [Lupinus angustifolius]	Medtr8g040260.1_hypothetical_protein_HC_chr8:15005757-15006760_20140818
459.606	-1.07411	0.000823151	0.0254794	MSTRG.51161.2	1495	ABC transporter I family protein [Medicago truncatula]/gi	Medtr1g084720.1_ABC_transporter_I_family_protein_HC_chr1:37711246-37714842_20140818
104.328	-1.07416	0.000596341	0.0205531	128765_t	807	expansin A1 [Medicago truncatula]/gi	Medtr5g076950.1_expansin_A1_HC_chr5:32826387-32823320_20140818
203.82	-1.07434	0.00193439	0.0454061	MSTRG.26134.3	1075	cytochrome P450 family protein [Medicago truncatula]/gi	Medtr7g075610.1_cytochrome_P450_family_protein_LC_chr7:28332016-28328062_20140818
4976.13	-1.07449	6.28e-05	0.00406457	MSTRG.3529.2	1192	hypothetical protein LSAT_9X35301 [Lactuca sativa]	Medtr8g040260.1_hypothetical_protein_HC_chr8:15005757-15006760_20140818
99.0925	-1.07514	0.000238262	0.0107824	MSTRG.65099.3	2423	FAD/NAD(P)-binding oxidoreductase family protein [Medicago truncatula]/gi	Medtr3g085660.1_FAD/NAD(P)-binding_oxidoreductase_family_protein_HC_chr3:38751810-38758033_20140818
538.736	-1.07581	0.000698664	0.0229513	MSTRG.60876.3	2357	heat shock cognate 70 kDa protein [Medicago truncatula]/gi	Medtr7g024390.1_heat_shock_cognate_70_kDa_protein_HC_chr7:8016048-8019129_20140818
72.7433	-1.0761	0.000137573	0.00725031	2891_t	426	transducin/WD40 repeat protein [Medicago truncatula]/gi	Medtr7g088540.1_transducin/WD40_repeat_protein_HC_chr7:34502944-34495795_20140818
600.619	-1.07618	3.1e-07	6.52e-05	MSTRG.24017.1	1726	---NA---	---NA---
172.668	-1.07619	0.00178252	0.0431084	33327_t	363	copper ion-binding protein [Medicago truncatula]/gi	Medtr4g052910.1_copper_ion-binding_protein_HC_chr4:19192011-19187858_20140818
135.642	-1.07645	8.57e-05	0.00508828	MSTRG.5383.6	2094	PREDICTED: alpha-glucosidase isoform X1 [Cicer arietinum]	Medtr1g110980.1_alpha-glucosidase_HC_chr1:50113081-50108965_20140818
100.908	-1.07674	0.00115994	0.0322448	MSTRG.86984.3	1825	transducin/WD40 repeat protein [Medicago truncatula]/gi	Medtr1g060580.1_transducin/WD40_repeat_protein_HC_chr1:26357922-26370061_20140818
211.258	-1.07693	0.00195304	0.0456955	MSTRG.37169.3	3798	phototropin-2 protein [Medicago truncatula]/gi	Medtr2g095980.1_phototropin-2_protein_HC_chr2:40954105-40966668_20140818
137.17	-1.07709	8.7e-05	0.00514949	MSTRG.15145.1	1722	tubulin [Medicago truncatula]/gi	Medtr8g107250.1_tubulin_HC_chr8:45318751-45321187_20140818
2094.83	-1.07804	1.58e-05	0.00146319	MSTRG.49269.2	854	hypothetical protein GLYMA_U007300 [Glycine max]	Medtr0055s0030.1_hypothetical_protein_HC_scaffold0055:6527-3946_20140818
1340.79	-1.07817	1.22e-06	0.000198533	MSTRG.86457.1	823	ribosomal protein S13P/S18e [Medicago truncatula]/gi	Medtr1g098220.1_ribosomal_protein_S13P/S18e_HC_chr1:44206377-44208520_20140818
141.922	-1.07922	0.000544148	0.019216	47659_t	2151	superkiller-like protein [Medicago truncatula]/gi	Medtr5g004660.1_superkiller-like_protein_HC_chr5:57937-73020_20140818
216.744	-1.08038	0.000732564	0.0236591	62687_t	1638	fructose-26-bisphosphatase [Medicago truncatula]/gi	Medtr6g033275.1_fructose-2,6-bisphosphatase_HC_chr6:10591642-10597681_20140818
81.9526	-1.08092	2.01e-05	0.0017491	MSTRG.24.12	875	---NA---	---NA---
88.7351	-1.08137	0.001266	0.0341156	78217_t	2448	sucrose synthase [Medicago truncatula]/gi	Medtr3g064610.1_sucrose_synthase_HC_chr3:29122075-29116823_20140818
99.945	-1.08148	0.000104909	0.00592583	MSTRG.62911.3	1494	hypothetical protein MTR_7g086210 [Medicago truncatula]/gi	Medtr7g086210.1_hypothetical_protein_LC_chr7:33433930-33432245_20140818
326.905	-1.08306	0.000454818	0.0170032	MSTRG.83941.11	436	ubiquitin-activating enzyme E1 1 [Medicago truncatula]/gi	Medtr5g072480.2_ubiquitin-activating_enzyme_E1_1_HC_chr5:30842736-30830993_20140818
138.11	-1.08344	0.000331253	0.0136703	MSTRG.37124.4	1085	methyltransferase PMT14-like protein putative [Medicago truncatula]/gi	Medtr4g098890.1_methyltransferase_PMT14-like_protein,_putative_LC_chr4:40830508-40819672_20140818
59.1821	-1.08364	0.00102681	0.0296633	128949_t	1107	histidine kinase- DNA gyrase B [Medicago truncatula]/gi	Medtr4g105530.1_histidine_kinase-,_DNA_gyrase_B_HC_chr4:43806717-43795114_20140818
1058.53	-1.08514	0.000635566	0.0214985	MSTRG.14738.4	1426	---NA---	---NA---
262.878	-1.08611	4.89e-05	0.00338601	MSTRG.36479.1	2782	subtilisin-like serine protease [Medicago truncatula]/gi	Medtr3g082200.1_subtilisin-like_serine_protease_HC_chr3:37112701-37105455_20140818
2793.96	-1.08678	2.6e-05	0.00213132	MSTRG.65506.1	603	60S ribosomal protein L37a-like [Hevea brasiliensis]	Medtr0199s0040.1_60S_ribosomal_protein_L37a-2_LC_scaffold0199:12346-16101_20140818
121.325	-1.08706	0.000226154	0.0103778	MSTRG.10359.2	2022	glycylpeptide N-tetradecanoyltransferase [Medicago truncatula]/gi	Medtr2g040010.1_glycylpeptide_N-tetradecanoyltransferase_HC_chr2:17554131-17552516_20140818
730.535	-1.08796	0.000417191	0.0160888	MSTRG.72222.8	1407	chalcone and stilbene synthase family protein [Medicago truncatula]/gi	Medtr1g098140.1_chalcone_and_stilbene_synthase_family_protein_HC_chr1:44127878-44129689_20140818
122.617	-1.08911	0.000168892	0.00839161	MSTRG.56123.3	2436	hypothetical protein TSUD_396190 [Trifolium subterraneum]	Medtr4g060460.1_auxin_response_factor-like_protein_HC_chr4:22234433-22239989_20140818
56.7204	-1.08962	0.00129678	0.0346605	MSTRG.21835.1	1193	F-box protein interaction domain protein [Medicago truncatula]/gi	Medtr3g010620.1_F-box_protein_interaction_domain_protein_LC_chr3:2501241-2504650_20140818
355.915	-1.08965	0.000254632	0.0112838	56377_t	4170	polyprotein [Oryza australiensis]	Medtr6g472230.1_disease_resistance_protein_(TIR-NBS-LRR_class),_putative_LC_chr6:26054240-26059623_20140818
7056.43	-1.09183	1.11e-05	0.00110483	MSTRG.55996.3	2657	hypothetical protein DCAR_001146 [Daucus carota subsp. sativus]	Medtr8g040260.1_hypothetical_protein_HC_chr8:15005757-15006760_20140818
115.734	-1.09336	0.0014151	0.0368453	MSTRG.24.9	855	---NA---	---NA---
60.1017	-1.0939	0.00136803	0.0359584	MSTRG.49877.3	1292	subtilisin-like serine protease [Medicago truncatula]/gi	Medtr7g081420.1_subtilisin-like_serine_protease_HC_chr7:31066744-31060807_20140818
1178.24	-1.09399	0.000640213	0.0216179	MSTRG.53026.2	815	UNKNOWN [Stylonychia lemnae]	Medtr0055s0130.1_hypothetical_protein_HC_scaffold0055:73353-68450_20140818
195.297	-1.09472	4.07e-07	8.08e-05	MSTRG.47433.5	1599	FGGY family of carbohydrate kinase [Medicago truncatula]/gi	Medtr4g128640.1_FGGY_family_of_carbohydrate_kinase_HC_chr4:53536963-53544282_20140818
300.198	-1.09524	9.43e-08	2.53e-05	MSTRG.51307.1	919	hypothetical protein MTR_7g012940 [Medicago truncatula]/gi	Medtr7g012940.1_hypothetical_protein_HC_chr7:3661702-3659291_20140818
109.415	-1.09691	0.00138601	0.0363077	MSTRG.42899.2	3930	polyprotein [Oryza australiensis]	Medtr6g472230.1_disease_resistance_protein_(TIR-NBS-LRR_class),_putative_LC_chr6:26054240-26059623_20140818
268.673	-1.09807	1.45e-10	9.79e-08	MSTRG.88627.7	3692	hypothetical protein TSUD_211190 partial [Trifolium subterraneum]	Medtr8g077840.1_U1_small_nuclear_ribonucleoprotein_70_kDa_protein,_putative_HC_chr8:33136013-33130173_20140818
129.9	-1.09817	0.000226949	0.010396	MSTRG.17023.3	2086	hypothetical protein MTR_1g075280 [Medicago truncatula]/gi	Medtr1g075280.1_hypothetical_protein_HC_chr1:33320925-33315855_20140818
828.557	-1.10006	0.000145662	0.00752207	MSTRG.56924.6	783	---NA---	---NA---
65.7214	-1.10024	0.00107888	0.0306009	MSTRG.48038.1	592	transmembrane protein putative [Medicago truncatula]/gi	Medtr3g032520.1_transmembrane_protein,_putative_HC_chr3:10269908-10270566_20140818
192.168	-1.10248	0.000376871	0.0150053	MSTRG.9400.3	1160	unknown [Medicago truncatula]	Medtr3g101490.1_DUF829_domain_protein_HC_chr3:46712329-46716698_20140818
258.951	-1.10274	0.000996188	0.0290042	43432_t	2682	hypothetical protein TSUD_25480 [Trifolium subterraneum]	Medtr1g060580.1_transducin/WD40_repeat_protein_HC_chr1:26357922-26370061_20140818
52.9425	-1.1029	0.00157063	0.0395038	140517_t	963	YGGT family protein [Medicago truncatula]/gi	Medtr3g105100.1_YGGT_family_protein_HC_chr3:48456403-48454215_20140818
437.987	-1.1036	0.000152409	0.00777972	MSTRG.63733.3	1421	COBRA-like protein 2 precursor [Medicago truncatula]/gi	Medtr2g462010.1_COBRA-like_protein_2_precursor_HC_chr2:25663863-25660070_20140818
188.263	-1.10517	0.000254832	0.0112862	57155_t	933	ribonucleoside-diphosphate reductase small chain [Medicago truncatula]/gi	Medtr0268s0080.1_ribonucleoside-diphosphate_reductase_small_chain_HC_scaffold0268:22239-23602_20140818
687.11	-1.1053	4.16e-09	1.76e-06	194114_t	696	gamma carbonic anhydrase-like protein [Medicago truncatula]/gi	Medtr5g020850.1_gamma_carbonic_anhydrase-like_protein_HC_chr5:7990017-7994242_20140818
325.911	-1.10579	0.00089243	0.0269194	MSTRG.20785.1	2487	heat shock cognate 70 kDa protein [Medicago truncatula]/gi	Medtr7g024390.1_heat_shock_cognate_70_kDa_protein_HC_chr7:8016048-8019129_20140818
1190.55	-1.10701	2.72e-06	0.000373373	11205_t	1662	pectinesterase/pectinesterase inhibitor [Medicago truncatula]/gi	Medtr7g050950.1_pectinesterase/pectinesterase_inhibitor_HC_chr7:17806561-17808670_20140818
246.267	-1.10751	8.04e-05	0.00487979	MSTRG.9400.2	1877	unknown [Medicago truncatula]	Medtr3g101490.1_DUF829_domain_protein_HC_chr3:46712329-46716698_20140818
353.855	-1.1078	4.29e-08	1.32e-05	MSTRG.10730.2	1817	peptidyl-prolyl cis-trans isomerase FKBP-type protein [Medicago truncatula]/gi	Medtr4g055500.1_peptidyl-prolyl_cis-trans_isomerase,_FKBP-type_protein_HC_chr4:20216928-20229058_20140818
386.151	-1.10915	0.000135594	0.00718416	MSTRG.20588.2	4250	polyprotein [Oryza australiensis]	Medtr6g472230.1_disease_resistance_protein_(TIR-NBS-LRR_class),_putative_LC_chr6:26054240-26059623_20140818
229.767	-1.10945	0.000816477	0.0253538	MSTRG.41276.2	1146	---NA---	---NA---
389.28	-1.11114	0.000423432	0.0162414	MSTRG.73027.6	1292	alanine-glyoxylate aminotransferase-like protein [Medicago truncatula]/gi	Medtr7g072420.1_alanine-glyoxylate_aminotransferase-like_protein_HC_chr7:26902387-26894982_20140818
61.326	-1.11154	0.00204478	0.047105	MSTRG.13789.2	1346	F-box protein interaction domain protein [Medicago truncatula]/gi	Medtr3g024150.1_F-box_protein_interaction_domain_protein_LC_chr3:7443947-7436161_20140818
162.197	-1.1122	0.000331649	0.013683	MSTRG.44549.1	1005	thioredoxin M-type protein [Medicago truncatula]/gi	Medtr8g059015.1_thioredoxin_M-type_protein_HC_chr8:20541253-20543952_20140818
342.915	-1.11296	5.9e-05	0.00387891	110486_t	3108	SWI/SNF complex subunit SWI3D [Medicago truncatula]/gi	Medtr4g069830.1_SWI/SNF_complex_subunit_SWI3D_HC_chr4:26258593-26267090_20140818
56.1275	-1.11373	0.00123565	0.0336076	MSTRG.57877.2	1050	histidine kinase- DNA gyrase B [Medicago truncatula]/gi	Medtr4g105530.1_histidine_kinase-,_DNA_gyrase_B_HC_chr4:43806717-43795114_20140818
1941.94	-1.11518	4.63e-06	0.000562418	MSTRG.65506.2	572	60S ribosomal protein L37a-like [Hevea brasiliensis]	Medtr8g007485.1_60S_ribosomal_protein_L37a-2_HC_chr8:1570482-1572532_20140818
1445.43	-1.11542	1.91e-09	8.94e-07	MSTRG.25690.1	1247	gamma carbonic anhydrase-like protein [Medicago truncatula]/gi	Medtr5g020850.1_gamma_carbonic_anhydrase-like_protein_HC_chr5:7990017-7994242_20140818
146.83	-1.11584	0.00124114	0.0337098	MSTRG.6316.2	2030	phosphoribosylamine-glycine ligase [Medicago truncatula]/gi	Medtr5g025310.1_phosphoribosylamine-glycine_ligase_HC_chr5:10273856-10270550_20140818
409.673	-1.11625	2.48e-07	5.52e-05	32330_t	948	phosphate-responsive 1 family protein [Medicago truncatula]/gi	Medtr5g064340.1_phosphate-responsive_1_family_protein_HC_chr5:26991118-26992199_20140818
88.5805	-1.11714	0.00184845	0.0441241	MSTRG.79007.2	3236	disease resistance protein (TIR-NBS-LRR class) [Medicago truncatula]/gi	Medtr4g051738.1_disease_resistance_protein_(TIR-NBS-LRR_class)_LC_chr4:18731992-18727789_20140818
73.872	-1.11911	0.000579311	0.0201004	MSTRG.14273.1	1161	rhodanese/cell cycle control phosphatase superfamily protein [Medicago truncatula]/gi	Medtr7g092820.1_rhodanese/cell_cycle_control_phosphatase_superfamily_protein_HC_chr7:36835880-36832869_20140818
107.187	-1.11941	0.000663545	0.0221691	MSTRG.86984.4	1978	transducin/WD40 repeat protein [Medicago truncatula]/gi	Medtr1g060580.1_transducin/WD40_repeat_protein_HC_chr1:26357922-26370061_20140818
100.132	-1.11955	0.00174651	0.0424627	145215_t	591	transmembrane protein putative [Medicago truncatula]/gi	Medtr3g115930.1_transmembrane_protein,_putative_HC_chr3:54195222-54187330_20140818
475.082	-1.12022	2.35e-06	0.000332939	MSTRG.62347.2	2129	DHHC type zinc finger protein [Medicago truncatula]/gi	Medtr7g083480.1_DHHC_type_zinc_finger_protein_HC_chr7:32116152-32109973_20140818
126.415	-1.12041	0.00114632	0.0319716	MSTRG.61300.1	939	unknown [Medicago truncatula]/gi	Medtr3g058630.1_ZIP_metal_ion_transporter_family_protein_HC_chr3:23327093-23324436_20140818
118.542	-1.12125	0.00145465	0.0375157	MSTRG.72082.1	2512	plant/T32M21-140 protein [Medicago truncatula]/gi	Medtr3g091180.1_plant/T32M21-140_protein_HC_chr3:41443946-41447934_20140818
534.124	-1.12185	0.000164999	0.00824314	MSTRG.23399.4	992	---NA---	---NA---
224.598	-1.12251	7e-06	0.000773474	MSTRG.37596.21	2690	subtilisin-like serine protease [Medicago truncatula]/gi	Medtr7g081420.1_subtilisin-like_serine_protease_HC_chr7:31066744-31060807_20140818
42.5733	-1.12258	0.000577553	0.0200528	MSTRG.86542.3	615	alpha-L-fucosidase [Medicago truncatula]/gi	Medtr4g127370.1_alpha-L-fucosidase_HC_chr4:52858050-52851518_20140818
343.403	-1.12273	0.00213901	0.0485395	MSTRG.61694.1	1854	UDP-glucosyl transferase 88A1 [Medicago truncatula]/gi	Medtr6g033660.1_UDP-glucosyl_transferase_88A1_HC_chr6:11001486-11003397_20140818
698.734	-1.12288	4.44e-10	2.6e-07	MSTRG.55433.3	7660	phosphoglycerate mutase-like protein [Medicago truncatula]/gi	Medtr6g011290.2_phosphoglycerate_mutase-like_protein_HC_chr6:3122519-3140624_20140818
47307.3	-1.12343	6.41e-08	1.84e-05	100984_t	870	---NA---	---NA---
62.4306	-1.12512	0.00149902	0.038265	MSTRG.79007.1	3727	functional resistance protein KR1 putative [Medicago truncatula]/gi	Medtr4g051715.1_functional_resistance_protein_KR1,_putative_LC_chr4:18724421-18719631_20140818
60.6096	-1.12723	0.000211304	0.00988395	MSTRG.24504.3	1655	alanine-tRNA ligase [Medicago truncatula]/gi	Medtr4g074640.1_alanine-tRNA_ligase_HC_chr4:28430949-28445218_20140818
61.1123	-1.12802	0.000356757	0.0144344	MSTRG.19839.1	1943	hypothetical protein TSUD_352460 [Trifolium subterraneum]	Medtr3g081050.1_hypothetical_protein_LC_chr3:36710284-36708952_20140818
575.489	-1.12924	0.000268561	0.0117365	MSTRG.28525.3	1256	---NA---	Medtr2g086420.2_BZIP_family_transcription_factor_HC_chr2:36331394-36338285_20140818
86.2449	-1.12932	0.000513989	0.0184294	MSTRG.86125.1	764	hypothetical protein MTR_3g019060 [Medicago truncatula]/gi	Medtr3g019060.1_hypothetical_protein_HC_chr3:5308654-5310320_20140818
354.461	-1.12981	0.000141671	0.00739338	67703_t	2487	hypothetical protein TSUD_328240 [Trifolium subterraneum]	Medtr7g087047.1_zinc_finger_(Ran-binding)_family_protein_HC_chr7:33870448-33877120_20140818
67.8862	-1.12998	0.00183507	0.0439401	MSTRG.41837.1	809	---NA---	Medtr8g086320.1_hypothetical_protein_HC_chr8:35799854-35800667_20140818
106.298	-1.1304	0.00098705	0.0288357	MSTRG.3058.3	1950	RING/U-box protein [Medicago truncatula]/gi	Medtr4g059540.1_RING/U-box_protein_HC_chr4:21933621-21928732_20140818
95.0733	-1.13041	0.000103014	0.005848	MSTRG.36333.1	1735	hypothetical protein MTR_1g069475 [Medicago truncatula]/gi	Medtr1g069475.1_hypothetical_protein_LC_chr1:30093587-30092047_20140818
157.644	-1.131	1.03e-06	0.000173154	MSTRG.51307.3	589	hypothetical protein MTR_7g012940 [Medicago truncatula]/gi	Medtr7g012940.1_hypothetical_protein_HC_chr7:3661702-3659291_20140818
246.425	-1.13123	2.41e-05	0.0020063	MSTRG.85285.3	915	unknown [Lotus japonicus]	Medtr3g463620.1_p23-like_NUD_(nuclear_distribution)-like_protein_HC_chr3:25506326-25504512_20140818
317.991	-1.1316	2.18e-05	0.00186271	89410_t	312	hypothetical protein SETIT_032292mg partial [Setaria italica]	Medtr8g038460.1_histone_H4_domain_protein_HC_chr8:14261400-14260862_20140818
233.846	-1.13251	0.00116709	0.0323566	149161_t	1413	thylakoid rhodanese-like protein [Medicago truncatula]/gi	Medtr8g027835.1_thylakoid_rhodanese-like_protein_HC_chr8:10166016-10171090_20140818
573.32	-1.13416	1.61e-05	0.00147906	MSTRG.87844.1	2253	adenylosuccinate lyase [Medicago truncatula]/gi	Medtr7g092860.1_adenylosuccinate_lyase_HC_chr7:36850278-36855203_20140818
50.5915	-1.13422	0.000277914	0.0120299	158461_t	2451	zinc knuckle (CCHC-type) family protein [Medicago truncatula]/gi	Medtr2g040410.1_zinc_knuckle_(CCHC-type)_family_protein_LC_chr2:17736264-17729542_20140818
6118.32	-1.1349	4.78e-06	0.000576168	MSTRG.15678.3	2657	hypothetical protein DCAR_001146 [Daucus carota subsp. sativus]	Medtr8g040260.1_hypothetical_protein_HC_chr8:15005757-15006760_20140818
381.805	-1.13666	0.000205119	0.00968823	MSTRG.86128.3	1736	PTI1-like tyrosine-kinase [Medicago truncatula]/gi	Medtr3g019120.1_PTI1-like_tyrosine-kinase_LC_chr3:5339891-5336089_20140818
75.2329	-1.13682	0.000178147	0.00873381	MSTRG.73422.2	1697	hypothetical protein MTR_5g057715 [Medicago truncatula]/gi	Medtr5g057715.1_hypothetical_protein_LC_chr5:23834152-23832736_20140818
847.621	-1.13765	0.000178123	0.00873381	MSTRG.72222.6	1497	chalcone and stilbene synthase family protein [Medicago truncatula]/gi	Medtr1g098140.1_chalcone_and_stilbene_synthase_family_protein_HC_chr1:44127878-44129689_20140818
66.537	-1.13778	0.000532445	0.0188975	14055_t	603	hypothetical protein TSUD_361990 [Trifolium subterraneum]	Medtr6g053110.1_Tic22_family_protein_HC_chr6:19048805-19062097_20140818
3167.15	-1.13815	6.41e-06	0.000724346	MSTRG.54474.3	2657	hypothetical protein DCAR_001146 [Daucus carota subsp. sativus]	Medtr8g040260.1_hypothetical_protein_HC_chr8:15005757-15006760_20140818
279.544	-1.13826	1.87e-05	0.00165635	MSTRG.34881.1	1950	charged multivesicular body protein [Medicago truncatula]/gi	Medtr1g090490.2_charged_multivesicular_body_protein_HC_chr1:40531583-40527844_20140818
607.073	-1.13916	0.00078111	0.0246273	92578_t	588	hypothetical protein MTR_5g098020 [Medicago truncatula]/gi	Medtr5g098020.1_hypothetical_protein_HC_chr5:42915253-42913131_20140818
149.046	-1.1394	0.000276129	0.0119957	MSTRG.2181.1	2318	LRR receptor-like kinase [Medicago truncatula]/gi	Medtr4g107620.1_LRR_receptor-like_kinase_HC_chr4:44579286-44583337_20140818
246.807	-1.13963	0.00015403	0.00785215	106983_t	2373	phosphate-responsive 1 family protein [Medicago truncatula]/gi	Medtr5g064340.1_phosphate-responsive_1_family_protein_HC_chr5:26991118-26992199_20140818
169.72	-1.1404	0.00139099	0.0363828	31645_t	1635	laccase/diphenol oxidase family protein [Medicago truncatula]/gi	Medtr7g458880.1_laccase/diphenol_oxidase_family_protein_HC_chr7:21181179-21184098_20140818
659.98	-1.1409	2.74e-10	1.7e-07	MSTRG.76221.1	1188	vacuolar protein sorting-associated protein [Medicago truncatula]/gi	Medtr5g085380.1_vacuolar_protein_sorting-associated_protein_HC_chr5:36908086-36913115_20140818
120005	-1.14249	3.2e-08	1.02e-05	MSTRG.30022.4	918	---NA---	---NA---
234.238	-1.14321	0.000261378	0.0114811	MSTRG.24611.1	295	abscisic acid receptor [Medicago truncatula]/gi	Medtr4g014460.1_abscisic_acid_receptor_HC_chr4:4083299-4081745_20140818
761.108	-1.14341	5.43e-05	0.0036544	MSTRG.18243.1	1316	phosducin-like protein [Medicago truncatula]/gi	Medtr2g034610.1_phosducin-like_protein_HC_chr2:13241871-13237468_20140818
82.4562	-1.14376	2.15e-05	0.00183894	MSTRG.49424.2	1052	thioredoxin-like protein [Medicago truncatula]/gi	Medtr4g097500.1_thioredoxin-like_protein_HC_chr4:40173229-40178424_20140818
77.4009	-1.14399	0.000800534	0.0250323	164300_t	2610	ATP synthase D chain-like protein putative [Medicago truncatula]/gi	Medtr7g073700.1_ATP_synthase_D_chain-like_protein,_putative_HC_chr7:27577379-27585539_20140818
2680.93	-1.14453	1.08e-05	0.00108708	MSTRG.57610.3	2672	hypothetical protein DCAR_001146 [Daucus carota subsp. sativus]	Medtr8g040260.1_hypothetical_protein_HC_chr8:15005757-15006760_20140818
133.835	-1.1446	0.000879172	0.0266566	MSTRG.52865.3	1724	NAD(P)-binding rossmann-fold protein [Medicago truncatula]/gi	Medtr3g105660.1_NAD(P)-binding_rossmann-fold_protein_HC_chr3:48737521-48731447_20140818
88.1653	-1.14461	0.000311315	0.0130734	95319_t	945	flavonoid hydroxylase [Medicago truncatula]/gi	Medtr3g436390.1_flavonoid_hydroxylase_HC_chr3:12226531-12221643_20140818
174.167	-1.14744	4.84e-05	0.00336233	MSTRG.7718.3	1750	polyadenylation and cleavage factor 11-like protein [Trifolium pratense]	Medtr6g011450.2_PCF11P-related_protein_HC_chr6:3248562-3252804_20140818
93.4081	-1.14765	0.000896349	0.0270004	MSTRG.50342.2	1367	P-loop nucleoside triphosphate hydrolase superfamily protein [Medicago truncatula]/gi	Medtr7g091320.1_P-loop_nucleoside_triphosphate_hydrolase_superfamily_protein_HC_chr7:36058142-36064108_20140818
1069.98	-1.1491	0.00031612	0.0132112	MSTRG.39514.5	2065	hypothetical protein MTR_6g033455 [Medicago truncatula]/gi	Medtr6g033455.1_hypothetical_protein_LC_chr6:10800828-10801839_20140818
1041.69	-1.14988	0.000181835	0.00885783	MSTRG.62089.10	5720	vacuolar protein sorting protein [Medicago truncatula]/gi	Medtr5g013780.1_vacuolar_protein_sorting_protein_HC_chr5:4444545-4498541_20140818
291.686	-1.15016	6.41e-07	0.000116819	MSTRG.9291.4	2004	DEAD-box ATP-dependent RNA helicase family protein [Medicago truncatula]/gi	Medtr8g027780.1_DEAD-box_ATP-dependent_RNA_helicase_family_protein_HC_chr8:10120030-10127066_20140818
227.078	-1.15081	0.000143359	0.00744035	172948_t	1443	UDP-glucosyltransferase family protein [Medicago truncatula]/gi	Medtr5g464810.1_UDP-glucosyltransferase_family_protein_HC_chr5:26948299-26943332_20140818
1093.71	-1.1511	0.000587854	0.0203376	MSTRG.23399.10	1692	hypothetical protein MTR_1g099150 [Medicago truncatula]/gi	Medtr1g099150.1_hypothetical_protein_LC_chr1:44729271-44727107_20140818
184.967	-1.15374	4.8e-05	0.00334138	101371_t	1173	glycoside hydrolase family 1 protein [Medicago truncatula]/gi	Medtr0110s0040.2_glycoside_hydrolase_family_1_protein_HC_scaffold0110:27190-32106_20140818
253.632	-1.15486	7.93e-06	0.000851669	MSTRG.37596.20	2705	subtilisin-like serine protease [Medicago truncatula]/gi	Medtr7g081420.1_subtilisin-like_serine_protease_HC_chr7:31066744-31060807_20140818
4157.7	-1.15541	0.00015455	0.00787347	MSTRG.55219.2	793	hypothetical protein GLYMA_13G019900 [Glycine max]/gi	Medtr0055s0130.1_hypothetical_protein_HC_scaffold0055:73353-68450_20140818
52.1357	-1.15578	0.000903133	0.0271302	MSTRG.68546.1	393	glycoside hydrolase family 3 protein [Medicago truncatula]/gi	Medtr5g062430.1_glycoside_hydrolase_family_3_protein_HC_chr5:25929488-25923501_20140818
347.338	-1.1575	1.18e-06	0.000194202	MSTRG.31551.4	1515	mitochondrial alternative oxidase 2d2 [Medicago sativa]	Medtr5g070680.1_ubiquinol_oxidase_1a_HC_chr5:29933297-29930958_20140818
91.0297	-1.15775	2.41e-05	0.00200848	MSTRG.947.1	1158	blue copper-like protein [Medicago truncatula]/gi	Medtr2g025580.1_blue_copper-like_protein_HC_chr2:9146976-9148599_20140818
137.083	-1.15801	0.00056338	0.0196887	MSTRG.37124.6	1469	PREDICTED: probable methyltransferase PMT14 [Nicotiana sylvestris]/gi	Medtr4g098890.1_methyltransferase_PMT14-like_protein,_putative_LC_chr4:40830508-40819672_20140818
53.8602	-1.15802	0.000639007	0.0215969	MSTRG.43826.3	1090	serine acetyltransferase [Medicago truncatula]/gi	Medtr5g023760.1_serine_acetyltransferase_HC_chr5:9442738-9447738_20140818
136.132	-1.1582	0.00208841	0.0477832	MSTRG.26385.1	794	PREDICTED: uncharacterized protein LOC101508315 [Cicer arietinum]	Medtr0055s0110.1_senescence-associated_protein_HC_scaffold0055:58201-61046_20140818
68.5972	-1.15842	0.000703874	0.0230638	86862_t	1641	hypothetical protein MTR_7g056243 [Medicago truncatula]/gi	Medtr7g056243.1_hypothetical_protein_HC_chr7:19700581-19705457_20140818
191.259	-1.15863	9.59e-05	0.00553748	MSTRG.36479.2	2728	subtilisin-like serine protease [Medicago truncatula]/gi	Medtr3g082200.2_subtilisin-like_serine_protease_HC_chr3:37110926-37105455_20140818
156.646	-1.15933	2.69e-05	0.00219044	145751_t	2070	quinolinate synthetase A protein [Medicago truncatula]/gi	Medtr4g104680.1_quinolinate_synthetase_A_protein_HC_chr4:43367242-43373257_20140818
268.432	-1.15934	0.000344119	0.0140887	MSTRG.70525.3	1471	sulfite exporter TauE/SafE family protein [Medicago truncatula]/gi	Medtr1g026910.1_sulfite_exporter_TauE/SafE_family_protein_HC_chr1:8844393-8839537_20140818
84.0274	-1.1595	0.000902352	0.0271182	MSTRG.56924.5	1659	hypothetical protein TSUD_08930 [Trifolium subterraneum]	Medtr6g053230.1_transmembrane_protein,_putative_LC_chr6:19115468-19113774_20140818
193.732	-1.15989	0.00116559	0.0323266	MSTRG.64045.3	696	senescence-associated protein [Medicago truncatula]/gi	Medtr0052s0130.1_senescence-associated_protein_HC_scaffold0052:58473-60984_20140818
147.926	-1.16026	0.000287686	0.0123407	MSTRG.76525.2	1775	hypothetical protein MTR_3g114110 [Medicago truncatula]/gi	Medtr3g114110.3_hypothetical_protein_LC_chr3:53284633-53288572_20140818
137.642	-1.16049	2.75e-05	0.00223214	MSTRG.52087.1	3762	PPR containing plant protein [Medicago truncatula]/gi	Medtr1g037260.1_PPR_containing_plant_protein_HC_chr1:13702972-13699671_20140818
58.9343	-1.16203	0.000875769	0.0266208	MSTRG.58896.12	585	hypothetical protein GLYMA_09G093000 [Glycine max]	---NA---
335.296	-1.16555	4.91e-07	9.41e-05	MSTRG.13754.1	1655	PREDICTED: putative pentatricopeptide repeat-containing protein At1g16830 [Cicer arietinum]/gi	Medtr7g025610.1_PPR_containing_plant-like_protein,_putative_HC_chr7:8534854-8532764_20140818
105.945	-1.16624	0.000102335	0.00582864	MSTRG.54701.4	1017	unknown [Medicago truncatula]	Medtr5g079730.2_pyridoxal_kinase_HC_chr5:34090188-34098597_20140818
1034.75	-1.16822	0.00017481	0.00860017	MSTRG.62089.8	5721	vacuolar protein sorting protein [Medicago truncatula]/gi	Medtr5g013780.1_vacuolar_protein_sorting_protein_HC_chr5:4444545-4498541_20140818
112.169	-1.16828	6.86e-05	0.00434401	2281_t	807	PRA1 family protein [Medicago truncatula]/gi	Medtr2g078650.1_PRA1_family_protein_HC_chr2:32844485-32841932_20140818
85.3251	-1.16864	0.00162912	0.0405571	MSTRG.50342.3	1280	P-loop nucleoside triphosphate hydrolase superfamily protein [Medicago truncatula]/gi	Medtr7g091320.1_P-loop_nucleoside_triphosphate_hydrolase_superfamily_protein_HC_chr7:36058142-36064108_20140818
151.516	-1.16946	2.47e-06	0.000344624	MSTRG.68904.2	1169	unknown [Medicago truncatula]/gi	Medtr3g029640.1_F-box_SKIP23-like_protein_LC_chr3:9337600-9334357_20140818
135.101	-1.16977	0.00120558	0.0330569	MSTRG.30738.3	1859	transducin family protein/WD-40 repeat protein [Medicago truncatula]/gi	Medtr4g123597.1_transducin_family_protein/WD-40_repeat_protein_HC_chr4:51413416-51422755_20140818
270.558	-1.16996	0.00121544	0.0332506	MSTRG.28525.8	902	---NA---	---NA---
80.2237	-1.1702	0.00171575	0.041947	MSTRG.50342.1	1621	P-loop nucleoside triphosphate hydrolase superfamily protein [Medicago truncatula]/gi	Medtr7g091320.1_P-loop_nucleoside_triphosphate_hydrolase_superfamily_protein_HC_chr7:36058142-36064108_20140818
282.336	-1.17035	1.11e-05	0.00110316	6727_t	786	disease resistance protein (TIR-NBS-LRR class) [Medicago truncatula]/gi	Medtr5g037700.1_disease_resistance_protein_(TIR-NBS-LRR_class)_LC_chr5:16495070-16493385_20140818
388.113	-1.17265	9.5e-05	0.00549867	MSTRG.63733.1	4052	COBRA-like protein 2 precursor [Medicago truncatula]/gi	Medtr2g462010.1_COBRA-like_protein_2_precursor_HC_chr2:25663863-25660070_20140818
177.794	-1.1736	0.000157724	0.00798526	MSTRG.37124.3	2020	methyltransferase PMT14-like protein putative [Medicago truncatula]/gi	Medtr4g098890.1_methyltransferase_PMT14-like_protein,_putative_LC_chr4:40830508-40819672_20140818
84.2379	-1.17442	0.000663363	0.0221691	MSTRG.32994.3	2077	ABC transporter family protein [Medicago truncatula]/gi	Medtr6g034230.1_ABC_transporter_family_protein_HC_chr6:11634598-11627579_20140818
3350.86	-1.17472	0.000168325	0.00838228	MSTRG.55221.2	635	hypothetical protein GLYMA_13G019900 [Glycine max]/gi	Medtr0055s0130.1_hypothetical_protein_HC_scaffold0055:73353-68450_20140818
74.9837	-1.17616	0.00201146	0.0466007	MSTRG.48305.5	688	---NA---	---NA---
273.617	-1.17848	0.00143821	0.0372157	MSTRG.28525.9	978	---NA---	---NA---
110.013	-1.17868	0.000540897	0.0191276	MSTRG.46777.2	3515	disease resistance protein (TIR-NBS-LRR class) putative [Medicago truncatula]/gi	Medtr7g069180.1_disease_resistance_protein_(TIR-NBS-LRR_class),_putative_LC_chr7:25482983-25493583_20140818
398.057	-1.17899	3.58e-09	1.54e-06	MSTRG.29902.1	1790	trichome birefringence-like protein [Medicago truncatula]/gi	Medtr8g099300.1_trichome_birefringence-like_protein_HC_chr8:41815583-41818776_20140818
305.557	-1.18059	2.79e-06	0.00038181	MSTRG.31551.5	1355	mitochondrial alternative oxidase 2d2 [Medicago sativa]	Medtr5g070680.1_ubiquinol_oxidase_1a_HC_chr5:29933297-29930958_20140818
368.194	-1.18069	1.31e-05	0.00126015	MSTRG.20856.2	1817	zinc finger CCCH domain protein [Medicago truncatula]/gi	Medtr6g090380.1_zinc_finger_CCCH_domain_protein_HC_chr6:34339716-34341440_20140818
114.132	-1.18143	0.000710321	0.0231721	MSTRG.47569.3	330	---NA---	---NA---
149.644	-1.1825	0.000231901	0.0105848	MSTRG.37124.7	1179	methyltransferase PMT14-like protein putative [Medicago truncatula]/gi	Medtr4g098890.1_methyltransferase_PMT14-like_protein,_putative_LC_chr4:40830508-40819672_20140818
128.592	-1.18392	0.000104278	0.00590139	MSTRG.83731.1	1737	F-box and associated interaction domain protein [Medicago truncatula]/gi	Medtr2g028140.1_F-box_and_associated_interaction_domain_protein_LC_chr2:10354274-10351121_20140818
95.0726	-1.1848	0.000143153	0.00743462	67012_t	453	PREDICTED: probable histone H2A.1 [Cicer arietinum]	Medtr8g086640.1_core_histone_H2A/H2B/H3/H4_HC_chr8:35961338-35962088_20140818
112.964	-1.18546	5.05e-05	0.0034661	MSTRG.56123.4	2342	auxin response factor-like protein [Medicago truncatula]/gi	Medtr4g060460.1_auxin_response_factor-like_protein_HC_chr4:22234433-22239989_20140818
144.233	-1.18696	0.00136253	0.035838	MSTRG.6316.1	2335	phosphoribosylamine-glycine ligase [Medicago truncatula]/gi	Medtr5g025310.1_phosphoribosylamine-glycine_ligase_HC_chr5:10273856-10270550_20140818
95.1204	-1.18701	0.00116912	0.0323894	MSTRG.28741.1	1258	PREDICTED: mitochondrial import inner membrane translocase subunit TIM22 [Cicer arietinum]	Medtr3g093380.1_protein_translocase,_putative_HC_chr3:42666847-42671021_20140818
265.648	-1.18939	2.4e-08	7.98e-06	MSTRG.51274.1	1776	phenylalanyl-tRNA synthetase [Medicago truncatula]/gi	Medtr7g083030.1_phenylalanyl-tRNA_synthetase_HC_chr7:31871942-31863554_20140818
138.478	-1.18998	0.000360001	0.014524	MSTRG.25396.5	1665	Serine/Threonine-kinase HT1-like protein [Medicago truncatula]/gi	Medtr6g007603.1_Serine/Threonine-kinase_HT1-like_protein_HC_chr6:1663170-1667871_20140818
69.6458	-1.19099	0.000959832	0.0283452	MSTRG.43920.1	1769	hypothetical protein MTR_5g015985 [Medicago truncatula]/gi	Medtr5g015985.1_hypothetical_protein_LC_chr5:5634854-5636284_20140818
198.336	-1.19349	0.000539281	0.0190925	MSTRG.37169.4	3604	phototropin-2 protein [Medicago truncatula]/gi	Medtr2g095980.2_phototropin-2_protein_HC_chr2:40954105-40965915_20140818
59.5984	-1.1958	0.00164307	0.0408387	MSTRG.62911.1	1519	hypothetical protein MTR_7g086210 [Medicago truncatula]/gi	Medtr7g086210.1_hypothetical_protein_LC_chr7:33433930-33432245_20140818
64.7486	-1.19585	0.0002692	0.0117611	MSTRG.89304.1	291	unknown [Medicago truncatula]	Medtr8g014030.1_Avr9/Cf-9_rapidly_elicited_protein_HC_chr8:4359359-4358498_20140818
60.3726	-1.19609	0.00130876	0.0349158	MSTRG.86880.2	1304	PREDICTED: polygalacturonase-like [Glycine max]/gi	Medtr4g083660.1_polygalacturonase_HC_chr4:32524282-32522029_20140818
203.384	-1.19621	0.000459624	0.0171209	51741_t	1365	serpin-ZX-like protein [Medicago truncatula]/gi	Medtr3g101010.1_serpin-ZX-like_protein_HC_chr3:46477918-46480654_20140818
13620.6	-1.19702	9.91e-09	3.7e-06	MSTRG.58896.51	630	hydroproline-rich protein partial [Glycine max]	---NA---
166.14	-1.19723	4.72e-06	0.000570544	MSTRG.52087.3	3791	PPR containing plant protein [Medicago truncatula]/gi	Medtr1g037260.1_PPR_containing_plant_protein_HC_chr1:13702972-13699671_20140818
285.237	-1.19736	9.35e-06	0.000972706	MSTRG.20856.3	1344	zinc finger CCCH domain protein [Medicago truncatula]/gi	Medtr6g090380.1_zinc_finger_CCCH_domain_protein_HC_chr6:34339716-34341440_20140818
192.384	-1.19816	0.00195126	0.0456845	MSTRG.19248.1	1269	dihydroflavonol-4-reductase-like protein [Medicago truncatula]/gi	Medtr2g013260.1_dihydroflavonol-4-reductase-like_protein_HC_chr2:3546017-3551738_20140818
601.222	-1.20172	2.59e-14	4.84e-11	MSTRG.705.1	986	histone deacetylase complex subunit SAP18 [Medicago truncatula]/gi	Medtr8g033340.1_histone_deacetylase_complex_subunit_SAP18_HC_chr8:12850574-12854427_20140818
43.9304	-1.20386	0.000952869	0.0281987	97944_t	2064	subtilisin-like serine protease [Medicago truncatula]/gi	Medtr7g081420.1_subtilisin-like_serine_protease_HC_chr7:31066744-31060807_20140818
2283.16	-1.20605	0.000128598	0.00691037	MSTRG.48241.1	989	germin family 3 protein [Medicago truncatula]/gi	Medtr8g020630.1_germin_family_3_protein_HC_chr8:7270320-7271524_20140818
2716.08	-1.20653	2.71e-06	0.000372749	44941_t	1200	embryonic abundant-like protein [Medicago truncatula]/gi	Medtr8g045880.3_embryonic_abundant-like_protein_LC_chr8:17951791-17944953_20140818
125.738	-1.20708	2.57e-05	0.00211411	MSTRG.63556.12	1396	ascorbate peroxidase [Glycine max]	Medtr4g061140.3_L-ascorbate_peroxidase_HC_chr4:22583905-22580291_20140818
444.26	-1.20734	0.00222727	0.049856	68457_t	783	hypothetical protein MTR_5g098775 [Medicago truncatula]/gi	Medtr5g098775.1_hypothetical_protein_HC_chr5:43255326-43254503_20140818
55.9423	-1.20994	0.00178234	0.0431084	MSTRG.13030.3	748	unknown [Medicago truncatula]/gi	Medtr4g114180.1_chaperon_protein_P13.9,_putative_HC_chr4:47039776-47042488_20140818
480.835	-1.21124	4.71e-07	9.11e-05	68550_t	540	transcription initiation factor IID 31 kDa subunit [Medicago truncatula]/gi	Medtr3g015130.1_transcription_initiation_factor_IID,_31_kDa_subunit_HC_chr3:4330057-4326991_20140818
56.8944	-1.21164	0.00032846	0.0135913	53311_t	399	translocon at the outer envelope membrane ofs protein 75-III [Medicago truncatula]/gi	Medtr4g064780.1_translocon_at_the_outer_envelope_membrane_ofs_protein_75-III_HC_chr4:24172278-24167585_20140818
54.396	-1.21315	0.000157072	0.00796005	32015_t	399	translocon at the outer envelope membrane ofs protein 75-III [Medicago truncatula]/gi	Medtr4g064780.1_translocon_at_the_outer_envelope_membrane_ofs_protein_75-III_HC_chr4:24172278-24167585_20140818
54.8224	-1.21687	0.000973882	0.0286191	55854_t	1284	alpha-L-arabinofuranosidase/beta-D-xylosidase [Medicago truncatula]/gi	Medtr1g087240.1_alpha-L-arabinofuranosidase/beta-D-xylosidase_HC_chr1:39087950-39091868_20140818
25326.6	-1.22	1.21e-08	4.38e-06	MSTRG.58896.57	661	hypothetical protein XENTR_v90003756mg partial [Xenopus tropicalis]	---NA---
93.9166	-1.22027	0.00185373	0.0442228	MSTRG.28919.3	1455	unknown [Medicago truncatula]	Medtr7g096350.1_ABA-inducible_bHLH-type_transcription_factor_HC_chr7:38659003-38661345_20140818
83.4633	-1.22143	0.00079307	0.0248914	29911_t	3651	ABC transporter B family protein [Medicago truncatula]/gi	Medtr6g088670.1_ABC_transporter_B_family_protein_HC_chr6:33795204-33784137_20140818
954.352	-1.22221	0.000124579	0.00676717	MSTRG.62089.9	5730	vacuolar protein sorting protein [Medicago truncatula]/gi	Medtr5g013780.1_vacuolar_protein_sorting_protein_HC_chr5:4444545-4498541_20140818
152.017	-1.22335	0.000978354	0.028703	2942_t	1752	F-box/FBD/LRR protein [Medicago truncatula]/gi	Medtr7g087840.1_F-box/FBD/LRR_protein_LC_chr7:34145858-34152025_20140818
165.33	-1.22383	0.0005284	0.0188056	89162_t	2787	LRR and NB-ARC domain disease resistance protein [Medicago truncatula]/gi	Medtr3g056200.1_LRR_and_NB-ARC_domain_disease_resistance_protein_LC_chr3:22368944-22360746_20140818
213.765	-1.22401	1.26e-06	0.000203852	22823_t	1341	trichome birefringence-like protein [Medicago truncatula]/gi	Medtr8g099300.1_trichome_birefringence-like_protein_HC_chr8:41815583-41818776_20140818
307.194	-1.22434	0.00011332	0.00628111	MSTRG.70525.1	1703	sulfite exporter TauE/SafE family protein [Medicago truncatula]/gi	Medtr1g026910.1_sulfite_exporter_TauE/SafE_family_protein_HC_chr1:8844393-8839537_20140818
521.31	-1.22466	0.000472154	0.0174215	MSTRG.72222.2	1423	chalcone and stilbene synthase family protein [Medicago truncatula]/gi	Medtr1g098140.1_chalcone_and_stilbene_synthase_family_protein_HC_chr1:44127878-44129689_20140818
82.3833	-1.22576	0.00161731	0.0403602	MSTRG.68929.3	286	ubiquitin family protein [Medicago truncatula]/gi	Medtr1g012210.1_ubiquitin_family_protein_LC_chr1:2382883-2382131_20140818
185.725	-1.22666	4.65e-05	0.00326886	MSTRG.71393.4	2558	AF196288_1Ser/Thr specific protein phosphatase 2A B regulatory subunit alpha isoform [Medicago sativa subsp. x varia]	Medtr8g015880.1_protein_phosphatase_2A_55_kDa_regulatory_subunit_B_HC_chr8:5234334-5225723_20140818
77.7495	-1.22668	0.000921913	0.0275298	95962_t	1524	P-loop nucleoside triphosphate hydrolase superfamily protein [Medicago truncatula]/gi	Medtr7g091320.1_P-loop_nucleoside_triphosphate_hydrolase_superfamily_protein_HC_chr7:36058142-36064108_20140818
102.429	-1.23007	2.45e-05	0.00202941	MSTRG.52087.4	2403	hypothetical protein TSUD_12990 [Trifolium subterraneum]	Medtr1g037260.1_PPR_containing_plant_protein_HC_chr1:13702972-13699671_20140818
96.0083	-1.23044	5.81e-06	0.000674044	MSTRG.73420.2	2076	hypothetical protein MTR_5g057715 [Medicago truncatula]/gi	Medtr5g057715.1_hypothetical_protein_LC_chr5:23834152-23832736_20140818
564.138	-1.23238	0.000146286	0.00753672	MSTRG.72222.3	1226	chalcone and stilbene synthase family protein [Medicago truncatula]/gi	Medtr1g098140.1_chalcone_and_stilbene_synthase_family_protein_HC_chr1:44127878-44129689_20140818
103.192	-1.23255	1.24e-06	0.000200675	MSTRG.51277.1	412	---NA---	---NA---
248.899	-1.23256	1.29e-05	0.00123744	73744_t	1707	DEAD-box ATP-dependent RNA helicase family protein [Medicago truncatula]/gi	Medtr8g027780.1_DEAD-box_ATP-dependent_RNA_helicase_family_protein_HC_chr8:10120030-10127066_20140818
110.236	-1.23304	0.0020428	0.0470748	MSTRG.56860.1	1083	hydroxyproline-rich glycoprotein family protein putative [Medicago truncatula]/gi	Medtr5g030740.1_hydroxyproline-rich_glycoprotein_family_protein,_putative_HC_chr5:13133969-13135369_20140818
543.222	-1.23562	0.00101423	0.0293858	MSTRG.28525.7	1069	---NA---	---NA---
283.523	-1.23666	3.37e-08	1.07e-05	MSTRG.9291.2	2064	DEAD-box ATP-dependent RNA helicase family protein [Medicago truncatula]/gi	Medtr8g027780.1_DEAD-box_ATP-dependent_RNA_helicase_family_protein_HC_chr8:10120030-10127066_20140818
153.553	-1.23694	3.58e-05	0.00270902	MSTRG.6883.1	874	hypothetical protein TanjilG_06382 [Lupinus angustifolius]/gi	Medtr1g094840.1_cytochrome_C_oxidase_assembly_protein_COX16_HC_chr1:42657311-42657011_20140818
781.857	-1.24108	8.57e-08	2.34e-05	MSTRG.15349.1	1878	casein kinase II subunit alpha-like protein [Medicago truncatula]/gi	Medtr4g095670.1_casein_kinase_II_subunit_alpha-like_protein_HC_chr4:39891102-39897846_20140818
541.581	-1.2414	8.5e-05	0.00507515	MSTRG.72222.5	1286	chalcone and stilbene synthase family protein [Medicago truncatula]/gi	Medtr1g098140.1_chalcone_and_stilbene_synthase_family_protein_HC_chr1:44127878-44129689_20140818
84.7382	-1.24149	0.000472337	0.0174215	MSTRG.22512.7	644	histone acetyltransferase of the CBP family protein [Medicago truncatula]/gi	Medtr6g017010.1_histone_acetyltransferase_of_the_CBP_family_protein_LC_chr6:6678099-6681722_20140818
92.6389	-1.24198	1.98e-05	0.00173292	111947_t	303	unknown [Medicago truncatula]	Medtr3g054150.1_SWIB/MDM2_domain_protein_HC_chr3:21478240-21479690_20140818
83.5987	-1.24255	2.23e-05	0.0018897	MSTRG.38325.3	4883	disease resistance protein (CC-NBS-LRR class) family protein [Medicago truncatula]/gi	Medtr7g015770.1_disease_resistance_protein_(CC-NBS-LRR_class)_family_protein_HC_chr7:4919658-4913791_20140818
425.013	-1.24286	8.4e-07	0.000146424	MSTRG.34881.4	1284	charged multivesicular body protein [Medicago truncatula]/gi	Medtr1g090490.1_charged_multivesicular_body_protein_HC_chr1:40531630-40527429_20140818
520.89	-1.24311	0.000860468	0.0263241	MSTRG.84834.1	591	hypothetical protein MtrDRAFT_AC147431g6v2 [Medicago truncatula]	Medtr3g010283.1_transmembrane_protein,_putative_LC_chr3:2395543-2393930_20140818
91.0206	-1.2433	0.000317051	0.0132394	MSTRG.47569.1	308	---NA---	---NA---
118.021	-1.24488	6.91e-05	0.00436554	MSTRG.25888.3	652	acetyl-CoA carboxylase partial [Trifolium pratense]	Medtr3g073860.1_acetyl-CoA_carboxylase_HC_chr3:33355871-33343823_20140818
93.5406	-1.24534	0.000843934	0.0259825	MSTRG.15404.1	1117	C-4 methylsterol oxidase [Medicago truncatula]/gi	Medtr8g063210.1_C-4_methylsterol_oxidase_HC_chr8:26467122-26463827_20140818
73.0567	-1.24949	0.000877141	0.0266343	147297_t	2086	hypothetical protein MTR_4g092510 [Medicago truncatula]/gi	Medtr4g092510.1_hypothetical_protein_LC_chr4:36666895-36663979_20140818
123.105	-1.2498	0.000719177	0.023343	MSTRG.75164.7	625	thioredoxin-related transmembrane protein putative [Medicago truncatula]/gi	Medtr1g007120.1_thioredoxin-related_transmembrane_protein,_putative_HC_chr1:184125-190492_20140818
650.96	-1.25095	1.88e-07	4.42e-05	MSTRG.73892.2	2346	thylakoid rhodanese-like protein [Medicago truncatula]/gi	Medtr8g027835.1_thylakoid_rhodanese-like_protein_HC_chr8:10166016-10171090_20140818
629.728	-1.25123	1.72e-06	0.000259749	MSTRG.61170.1	2280	DEK domain chromatin associated protein [Medicago truncatula]/gi	Medtr3g098990.1_DEK_domain_chromatin_associated_protein_HC_chr3:45365234-45359585_20140818
164.279	-1.25184	0.000677907	0.0224792	MSTRG.79940.1	634	cinnamyl alcohol dehydrogenase-like protein [Medicago truncatula]/gi	Medtr5g031310.1_cinnamyl_alcohol_dehydrogenase-like_protein_HC_chr5:13427387-13425357_20140818
92.0385	-1.25215	0.001224	0.0333835	166060_t	2043	dihydroflavonol-4-reductase-like protein [Medicago truncatula]/gi	Medtr2g013250.1_dihydroflavonol-4-reductase-like_protein_HC_chr2:3537102-3544410_20140818
209.601	-1.25801	0.000220581	0.0102069	MSTRG.9425.2	1175	serpin-ZX-like protein [Medicago truncatula]/gi	Medtr3g101010.1_serpin-ZX-like_protein_HC_chr3:46477918-46480654_20140818
143.187	-1.25818	6.06e-08	1.76e-05	MSTRG.77817.5	2856	elongation factor 1-alpha [Medicago truncatula]/gi	Medtr1g101870.1_elongation_factor_1-alpha_LC_chr1:45981685-45990868_20140818
69.2655	-1.25858	0.00126249	0.0340625	MSTRG.51651.1	1280	DUF2419 family protein [Medicago truncatula]/gi	Medtr5g015840.1_DUF2419_family_protein_HC_chr5:5562606-5566929_20140818
162.759	-1.25902	0.000155702	0.00790617	MSTRG.58896.16	498	hypothetical protein GLYMA_09G093000 [Glycine max]	---NA---
81.3351	-1.26114	0.00080295	0.0250846	16893_t	2022	cytochrome P450 family 88 protein [Medicago truncatula]/gi	Medtr4g005230.1_cytochrome_P450_family_88_protein_LC_chr4:131589-124806_20140818
741.125	-1.26247	6.75e-05	0.00429466	MSTRG.41345.2	1421	GDSL-like lipase/acylhydrolase [Medicago truncatula]/gi	Medtr8g022810.1_GDSL-like_lipase/acylhydrolase_HC_chr8:8102108-8098448_20140818
93.6123	-1.2632	0.0011121	0.0312627	MSTRG.46378.2	986	pathogenic type III effector avirulence factor Avr AvrRpt-cleavage: cleavage site protein [Medicago truncatula]/gi	Medtr8g011470.1_pathogenic_type_III_effector_avirulence_factor_Avr_AvrRpt-cleavage:_cleavage_site_protein_HC_chr8:3105314-3102785_20140818
158.186	-1.26338	9.98e-05	0.00571633	MSTRG.20341.3	4007	RNA recognition motif (RRM) containing protein [Medicago truncatula]/gi	Medtr3g079310.1_RNA_recognition_motif_(RRM)_containing_protein_HC_chr3:35657324-35668580_20140818
85.8775	-1.26487	0.00126792	0.0341555	52968_t	1740	structural maintenance-like chromosomes-protein [Medicago truncatula]/gi	Medtr3g033470.1_structural_maintenance-like_chromosomes-protein_HC_chr3:10689887-10707051_20140818
229.569	-1.26532	1.7e-05	0.00154447	98350_t	1467	Fumarate lyase; Adenylosuccinate lyase [Medicago truncatula]	Medtr7g092860.1_adenylosuccinate_lyase_HC_chr7:36850278-36855203_20140818
107.705	-1.26604	0.00159632	0.0399589	160641_t	1968	unknown [Medicago truncatula]	Medtr3g463980.1_hypothetical_protein_LC_chr3:25690863-25686451_20140818
194.686	-1.26616	8.67e-08	2.35e-05	MSTRG.68904.1	1736	unknown [Medicago truncatula]/gi	Medtr3g029640.1_F-box_SKIP23-like_protein_LC_chr3:9337600-9334357_20140818
63.1259	-1.26778	0.000426576	0.0163135	MSTRG.12093.1	1753	methyl-CpG-binding domain protein [Medicago truncatula]/gi	Medtr4g010210.1_methyl-CpG-binding_domain_protein_LC_chr4:2290642-2289557_20140818
154.923	-1.26882	0.000665482	0.0221919	2974_t	1008	co-chaperone GrpE family protein [Medicago truncatula]/gi	Medtr7g087250.1_co-chaperone_GrpE_family_protein_HC_chr7:33973420-33978130_20140818
55.8264	-1.26952	0.00103306	0.0297535	MSTRG.62911.2	1165	hypothetical protein MTR_7g086210 [Medicago truncatula]/gi	Medtr7g086210.1_hypothetical_protein_LC_chr7:33433930-33432245_20140818
52.7341	-1.27142	0.000769198	0.0243842	MSTRG.12024.9	4140	DEAD-box RNA helicase family protein [Medicago truncatula]/gi	Medtr2g007000.1_DEAD-box_RNA_helicase_family_protein_HC_chr2:778249-784007_20140818
50.8516	-1.27286	0.00143322	0.0371299	MSTRG.57031.9	1568	MIF4G domain protein [Medicago truncatula]/gi	Medtr8g007000.1_MIF4G_domain_protein_LC_chr8:1163618-1166573_20140818
1890.53	-1.27337	0.000142992	0.00743462	MSTRG.78341.1	699	specific tissue protein [Medicago truncatula]/gi	Medtr4g069810.1_specific_tissue_protein_LC_chr4:26254363-26256642_20140818
124.109	-1.27344	0.0021196	0.048243	MSTRG.23017.8	1438	hypothetical protein MTR_5g054690 [Medicago truncatula]/gi	Medtr5g054690.1_hypothetical_protein_HC_chr5:22529114-22535637_20140818
70.1613	-1.27669	0.000206897	0.00975141	MSTRG.33559.3	1859	AAA ATPase central region [Medicago truncatula]	Medtr7g089040.1_calmodulin-interacting-like_protein_HC_chr7:34791514-34778371_20140818
92.3864	-1.27748	0.000277525	0.0120198	MSTRG.84058.3	1847	beta-galactosidase [Medicago truncatula]/gi	Medtr2g100110.2_beta-galactosidase_HC_chr2:42990882-42985372_20140818
171.232	-1.27953	0.00118143	0.0326197	117086_t	2181	PREDICTED: zinc finger BED domain-containing protein RICESLEEPER 2-like [Glycine max]/gi	Medtr4g036325.1_hypothetical_protein_LC_chr4:13081348-13082899_20140818
296.88	-1.2796	0.000473682	0.017435	30294_t	4047	Gag-Pol polyprotein [Medicago truncatula]	Medtr6g472230.1_disease_resistance_protein_(TIR-NBS-LRR_class),_putative_LC_chr6:26054240-26059623_20140818
49.79	-1.28021	0.00146232	0.0376508	MSTRG.41783.1	898	hypothetical protein MTR_1g090010 [Medicago truncatula]/gi	Medtr1g090010.1_hypothetical_protein_HC_chr1:40304990-40301831_20140818
46.4695	-1.28158	0.000567472	0.0198183	MSTRG.68981.2	1396	rhomboid family protein [Trifolium pratense]	Medtr1g008300.1_rhomboid_protease_YdcA-like_protein,_putative_HC_chr1:846306-849646_20140818
91.6228	-1.28171	6.33e-06	0.000716664	MSTRG.52087.2	2091	PPR containing plant protein [Medicago truncatula]/gi	Medtr1g037260.1_PPR_containing_plant_protein_HC_chr1:13702972-13699671_20140818
121.231	-1.28408	0.00185787	0.0442484	MSTRG.26951.8	1331	protein IQ-domain 14-like partial [Trifolium pratense]	Medtr1g103070.1_IQ_calmodulin-binding_motif_protein_HC_chr1:46630556-46633467_20140818
88.8355	-1.28513	3.53e-05	0.00268027	26447_t	2625	elongation factor 1-alpha [Medicago truncatula]/gi	Medtr1g101870.1_elongation_factor_1-alpha_LC_chr1:45981685-45990868_20140818
702.014	-1.28517	0.000115068	0.0063484	MSTRG.80069.1	495	unnamed protein product [Coffea canephora]	Medtr3g106310.1_60S_ribosomal_protein_L39-3_HC_chr3:49118161-49118875_20140818
55.546	-1.2852	0.00151961	0.0386081	MSTRG.36424.1	1026	ethylene-responsive transcription factor 1B [Medicago truncatula]/gi	Medtr1g070020.1_ethylene-responsive_transcription_factor_1B_HC_chr1:30699131-30697687_20140818
52.2506	-1.28674	4.2e-05	0.00303961	MSTRG.18991.1	639	mechanosensitive ion channel protein MscS [Medicago truncatula]/gi	Medtr8g028760.1_mechanosensitive_ion_channel_protein_MscS_HC_chr8:11086924-11081197_20140818
99.8067	-1.28698	4.89e-05	0.00338601	MSTRG.17794.9	2321	paired amphipathic helix SIN3-like protein [Medicago truncatula]/gi	Medtr8g062700.2_paired_amphipathic_helix_SIN3-like_protein_HC_chr8:26215827-26198402_20140818
41.3576	-1.28761	0.00111942	0.0314057	MSTRG.40143.3	728	hypothetical protein TSUD_224860 [Trifolium subterraneum]	Medtr5g017280.2_RNA-binding_(RRM/RBD/RNP_motif)_family_protein_HC_chr5:6293125-6298060_20140818
157.903	-1.28833	6.59e-05	0.00421515	MSTRG.13042.1	2470	RNA polymerase II transcription mediators protein [Medicago truncatula]/gi	Medtr4g114100.1_RNA_polymerase_II_transcription_mediators_protein_HC_chr4:46959573-46965802_20140818
26441.1	-1.2884	2.79e-08	9.15e-06	MSTRG.58896.59	593	hypothetical protein KK1_048371 [Cajanus cajan]	---NA---
295.648	-1.29125	1.24e-09	6.14e-07	MSTRG.9291.3	2049	DEAD-box ATP-dependent RNA helicase family protein [Medicago truncatula]/gi	Medtr8g027775.1_DEAD-box_ATP-dependent_RNA_helicase_family_protein_HC_chr8:10113462-10118856_20140818
54.2293	-1.29182	0.00111005	0.0312424	153638_t	1380	hypothetical protein MTR_7g086210 [Medicago truncatula]/gi	Medtr7g086210.1_hypothetical_protein_LC_chr7:33433930-33432245_20140818
1034.7	-1.29428	7.05e-05	0.00442848	MSTRG.61522.1	826	PREDICTED: 60S ribosomal protein L23a-like [Cicer arietinum]	Medtr4g063060.1_60S_ribosomal_protein_L23a-2_HC_chr4:23319050-23321520_20140818
58.2719	-1.2958	1.9e-05	0.00167509	MSTRG.12024.5	4366	DEAD-box RNA helicase family protein [Medicago truncatula]/gi	Medtr2g007000.1_DEAD-box_RNA_helicase_family_protein_HC_chr2:778249-784007_20140818
127.929	-1.29587	0.000867632	0.0264441	MSTRG.56890.2	1196	---NA---	---NA---
41.1799	-1.29638	0.00102495	0.0296301	MSTRG.29618.4	1106	stress-induced receptor-like kinase [Medicago truncatula]/gi	Medtr1g027140.1_stress-induced_receptor-like_kinase_LC_chr1:8960288-8955613_20140818
352.01	-1.29682	0.000118989	0.0065253	MSTRG.49189.2	513	hypothetical protein TanjilG_21878 [Lupinus angustifolius]	Medtr0052s0060.1_senescence-associated_protein_HC_scaffold0052:12279-15442_20140818
43.1718	-1.29718	0.00120938	0.0331261	MSTRG.68966.1	861	---NA---	---NA---
73.0125	-1.29989	0.000159731	0.00805469	MSTRG.52078.1	1246	PREDICTED: histone-lysine N-methyltransferase ATXR4 [Cicer arietinum]	Medtr1g054665.1_histone-lysine_N-methyltransferase_HC_chr1:23799361-23794876_20140818
253.129	-1.30029	5.17e-07	9.87e-05	17631_t	1218	S-adenosyl-methionine-sterol-C-methyltransferase [Medicago truncatula]/gi	Medtr3g032530.1_S-adenosyl-methionine-sterol-C-methyltransferase_HC_chr3:10278947-10271579_20140818
66.7991	-1.30138	0.00115169	0.032068	MSTRG.18673.1	364	---NA---	---NA---
151.59	-1.30192	2.34e-05	0.00196895	MSTRG.58896.45	557	hypothetical protein PHAVU_009G211300g partial [Phaseolus vulgaris]/gi	---NA---
69.3647	-1.30224	0.0022123	0.0496499	MSTRG.50867.4	1544	benzyl alcohol O-benzoyltransferase [Medicago truncatula]/gi	Medtr0042s0190.1_benzyl_alcohol_O-benzoyltransferase_LC_scaffold0042:88004-83869_20140818
131.077	-1.30393	1.16e-05	0.00114432	MSTRG.26474.1	2601	plant/F24K9-26 protein [Medicago truncatula]/gi	Medtr4g052400.2_plant/F24K9-26_protein_HC_chr4:18973883-18970196_20140818
47.2666	-1.30413	0.00198145	0.0461229	MSTRG.33651.1	1943	endosomal targeting BRO1-like domain protein [Medicago truncatula]/gi	Medtr1g077580.1_endosomal_targeting_BRO1-like_domain_protein_HC_chr1:34630580-34623270_20140818
53.1904	-1.30439	0.000951748	0.0281763	MSTRG.75103.1	818	---NA---	Medtr4g081570.1_hypothetical_protein_HC_chr4:31662008-31662934_20140818
290.384	-1.30531	5.57e-06	0.000653484	52144_t	2046	NADP-dependent malic enzyme [Medicago truncatula]/gi	Medtr8g032040.1_NADP-dependent_malic_enzyme_HC_chr8:12025357-12015448_20140818
4207.26	-1.30657	2.81e-06	0.000382907	MSTRG.25682.2	1339	isoflavone reductase [Medicago sativa]	Medtr5g020800.1_isoflavone_reductase-like_protein_HC_chr5:7965936-7967985_20140818
338.759	-1.30663	3.03e-10	1.86e-07	MSTRG.9291.1	2087	DEAD-box ATP-dependent RNA helicase family protein [Medicago truncatula]/gi	Medtr8g027780.1_DEAD-box_ATP-dependent_RNA_helicase_family_protein_HC_chr8:10120030-10127066_20140818
140.895	-1.30951	0.000558466	0.0195819	MSTRG.45072.2	329	---NA---	---NA---
1695.88	-1.31096	0.00112995	0.0316266	MSTRG.23399.18	1195	---NA---	---NA---
423.572	-1.31211	0.000125957	0.0068163	140570_t	2946	vacuolar protein sorting protein [Medicago truncatula]/gi	Medtr5g013780.1_vacuolar_protein_sorting_protein_HC_chr5:4444545-4498541_20140818
97.7568	-1.31368	0.00162667	0.0405286	85700_t	2463	protein FAR1-related sequence 5-like [Trifolium pratense]	Medtr5g076070.1_FAR1_DNA-binding_domain_protein_LC_chr5:32403065-32404098_20140818
124.674	-1.31586	4.04e-05	0.00295038	104422_t	312	hypothetical protein SETIT_032292mg partial [Setaria italica]	Medtr8g038460.1_histone_H4_domain_protein_HC_chr8:14261400-14260862_20140818
257.43	-1.31829	2.39e-08	7.98e-06	MSTRG.22531.1	1350	ATRER1A-like protein [Medicago truncatula]/gi	Medtr5g016560.1_ATRER1A-like_protein_HC_chr5:5950897-5953021_20140818
147.087	-1.31902	6.55e-08	1.86e-05	MSTRG.77817.2	3100	elongation factor 1-alpha [Medicago truncatula]/gi	Medtr1g101870.1_elongation_factor_1-alpha_LC_chr1:45981685-45990868_20140818
359.854	-1.32067	0.00094692	0.0280871	MSTRG.59783.2	695	4F5 family protein [Medicago truncatula]/gi	Medtr8g013640.1_4F5_family_protein_HC_chr8:4172047-4170182_20140818
345.535	-1.32154	1.91e-06	0.000281543	MSTRG.72039.2	1069	proline-rich cell wall-like protein [Medicago truncatula]/gi	Medtr3g090640.1_proline-rich_cell_wall-like_protein_HC_chr3:41142629-41139449_20140818
1680.31	-1.32231	1.11e-08	4.09e-06	MSTRG.79417.1	1882	glycoside hydrolase family 1 protein [Medicago truncatula]/gi	Medtr0110s0040.1_glycoside_hydrolase_family_1_protein_HC_scaffold0110:27186-32126_20140818
143.552	-1.32337	6.51e-05	0.00417897	108232_t	4377	disease resistance family protein/LRR protein [Medicago truncatula]/gi	Medtr4g018940.1_disease_resistance_family_protein/LRR_protein_LC_chr4:5859299-5856180_20140818
125.992	-1.32504	6.47e-05	0.00416249	MSTRG.37938.1	1833	---NA---	---NA---
172.816	-1.32675	2.92e-05	0.00233139	MSTRG.66611.1	2703	---NA---	---NA---
97.6428	-1.32777	0.000610156	0.020876	MSTRG.69116.6	2097	cysteine-rich RLK (receptor-like kinase) protein [Medicago truncatula]/gi	Medtr2g073540.1_cysteine-rich_RLK_(receptor-like_kinase)_protein_HC_chr2:31192430-31187436_20140818
101.159	-1.32912	0.000107826	0.00605461	MSTRG.43992.2	723	---NA---	---NA---
6883.22	-1.32971	4.09e-10	2.43e-07	MSTRG.76587.1	1952	embryonic abundant-like protein [Medicago truncatula]/gi	Medtr8g045880.3_embryonic_abundant-like_protein_LC_chr8:17951791-17944953_20140818
71.6671	-1.33108	0.000497707	0.0180364	MSTRG.69817.4	2718	transmembrane protein putative [Medicago truncatula]/gi	Medtr5g019500.1_transmembrane_protein,_putative_HC_chr5:7363922-7383422_20140818
79.3146	-1.33524	1.14e-05	0.00112653	MSTRG.26158.3	1671	pfkB family carbohydrate kinase [Medicago truncatula]/gi	Medtr1g069320.1_pfkB_family_carbohydrate_kinase_HC_chr1:29930923-29924862_20140818
166.984	-1.3373	0.00148152	0.0380316	167019_t	2340	translation elongation factor EF protein [Medicago truncatula]/gi	Medtr4g101750.1_translation_elongation_factor_EF_protein_HC_chr4:42090226-42085957_20140818
47.4165	-1.33793	0.00117843	0.0325661	40347_t	1188	PREDICTED: polygalacturonase-like [Cicer arietinum]	Medtr4g083660.1_polygalacturonase_HC_chr4:32524282-32522029_20140818
168.634	-1.34481	9.2e-06	0.000961039	MSTRG.84882.10	2150	serine carboxypeptidase-like protein [Medicago truncatula]/gi	Medtr2g012850.1_serine_carboxypeptidase-like_protein_HC_chr2:3332013-3335100_20140818
137.075	-1.34748	0.00176916	0.042899	MSTRG.84824.2	1530	shortage in chiasmata protein putative [Medicago truncatula]/gi	Medtr6g045357.1_shortage_in_chiasmata_protein,_putative_HC_chr6:16283994-16291769_20140818
36.5143	-1.34791	0.000950193	0.0281658	MSTRG.16813.9	910	endoribonuclease dicer-like protein [Medicago truncatula]/gi	Medtr2g030490.1_endoribonuclease_dicer-like_protein_HC_chr2:11495894-11486899_20140818
134.997	-1.349	0.00202333	0.0467708	MSTRG.23017.5	1324	hypothetical protein MTR_5g054690 [Medicago truncatula]/gi	Medtr5g054690.4_hypothetical_protein_HC_chr5:22529114-22535637_20140818
175.242	-1.3511	1.14e-08	4.19e-06	MSTRG.29858.3	2140	disease resistance protein (TIR-NBS-LRR class) [Medicago truncatula]/gi	Medtr4g020640.2_disease_resistance_protein_(TIR-NBS-LRR_class)_LC_chr4:6628037-6619333_20140818
163.467	-1.35125	0.00131353	0.0350129	MSTRG.15528.2	1949	glycoside hydrolase family 5 protein [Medicago truncatula]/gi	Medtr3g009010.1_glycoside_hydrolase_family_5_protein_HC_chr3:1744791-1738002_20140818
69.5341	-1.35188	0.000771397	0.0244249	MSTRG.32144.1	1597	receptor-like kinase [Medicago truncatula]/gi	Medtr5g038600.1_receptor-like_kinase_HC_chr5:16964184-16961179_20140818
224.375	-1.3547	0.00023234	0.0105878	MSTRG.37954.1	1730	transmembrane protein putative [Medicago truncatula]/gi	Medtr1g103200.1_transmembrane_protein,_putative_LC_chr1:46693705-46692474_20140818
67.7724	-1.35483	0.000121828	0.00665745	MSTRG.58896.53	526	hypothetical protein GLYMA_09G093000 [Glycine max]	---NA---
60.5157	-1.35499	0.00153915	0.0389049	79619_t	3759	LRR and NB-ARC domain disease resistance protein [Medicago truncatula]/gi	Medtr3g035940.1_LRR_and_NB-ARC_domain_disease_resistance_protein_HC_chr3:13332023-13338690_20140818
92.2806	-1.35632	5.84e-05	0.00385279	MSTRG.1773.10	918	acyl-activating enzyme 17 peroxisomal protein putative [Medicago truncatula]/gi	Medtr8g085680.1_acyl-activating_enzyme_17,_peroxisomal_protein,_putative_HC_chr8:35520462-35511959_20140818
306.995	-1.3571	0.000706649	0.0231142	MSTRG.31081.2	1979	---NA---	---NA---
114.759	-1.35792	0.0011103	0.0312424	MSTRG.14667.3	1421	replication factor C subunit 3-like protein [Trifolium pratense]	Medtr6g471010.1_DNA_replication_factor_C_complex_subunit_3_HC_chr6:25412156-25405812_20140818
65.012	-1.3586	0.00140595	0.0366688	MSTRG.1841.25	1614	flavin containing monooxygenase FMO GS-OX-like protein [Medicago truncatula]/gi	Medtr8g037910.1_flavin_containing_monooxygenase_FMO_GS-OX-like_protein_HC_chr8:14046363-14042504_20140818
68.1208	-1.35982	0.000296972	0.0126221	182126_t	4212	octicosapeptide/phox/Bem1p domain kinase superfamily protein [Medicago truncatula]/gi	Medtr4g116520.1_octicosapeptide/phox/Bem1p_domain_kinase_superfamily_protein_HC_chr4:48267560-48275263_20140818
218.345	-1.35996	0.000222724	0.0102632	MSTRG.34881.5	894	charged multivesicular body protein [Medicago truncatula]/gi	Medtr1g090490.1_charged_multivesicular_body_protein_HC_chr1:40531630-40527429_20140818
72.4972	-1.36088	0.00104336	0.0299777	MSTRG.34006.1	792	---NA---	Medtr8g086320.1_hypothetical_protein_HC_chr8:35799854-35800667_20140818
434.339	-1.36203	9.58e-06	0.00098846	MSTRG.28788.13	883	hypothetical protein MTR_1g099150 [Medicago truncatula]/gi	Medtr1g099150.1_hypothetical_protein_LC_chr1:44729271-44727107_20140818
53.7774	-1.36712	0.000435294	0.0165164	MSTRG.76160.2	2254	PPR containing protein [Medicago truncatula]/gi	Medtr6g093170.1_PPR_containing_protein_HC_chr6:35177726-35180122_20140818
45.047	-1.36911	0.00113692	0.0317816	12347_t	1998	S-locus lectin kinase family protein [Medicago truncatula]/gi	Medtr7g056430.1_S-locus_lectin_kinase_family_protein_LC_chr7:19965485-19970988_20140818
168.854	-1.37037	0.000729159	0.0235978	51368_t	972	transmembrane protein putative [Medicago truncatula]/gi	Medtr1g045440.1_transmembrane_protein,_putative_LC_chr1:17037116-17037745_20140818
5990.61	-1.37463	6.92e-10	3.73e-07	MSTRG.76587.2	1430	embryonic abundant-like protein [Medicago truncatula]/gi	Medtr8g045880.3_embryonic_abundant-like_protein_LC_chr8:17951791-17944953_20140818
179.493	-1.37599	0.000594752	0.0205075	23560_t	3162	transducin family protein/WD-40 repeat protein [Medicago truncatula]/gi	Medtr4g123597.1_transducin_family_protein/WD-40_repeat_protein_HC_chr4:51413416-51422755_20140818
42.3913	-1.37741	0.00185172	0.0441886	112711_t	417	unknown [Medicago truncatula]/gi	Medtr3g067610.1_EF_hand_calcium-binding_family_protein_HC_chr3:30197141-30196113_20140818
289.637	-1.37761	2.58e-05	0.00212132	MSTRG.86128.4	1286	PTI1-like tyrosine-kinase [Medicago truncatula]/gi	Medtr3g019120.2_PTI1-like_tyrosine-kinase_LC_chr3:5339886-5336089_20140818
80.5179	-1.37819	0.00126594	0.0341156	61932_t	1986	RNA polymerase II transcription mediators protein [Medicago truncatula]/gi	Medtr4g114100.1_RNA_polymerase_II_transcription_mediators_protein_HC_chr4:46959573-46965802_20140818
734.151	-1.37834	2.56e-09	1.15e-06	84556_t	1410	glycoside hydrolase family 1 protein [Medicago truncatula]/gi	Medtr0110s0040.1_glycoside_hydrolase_family_1_protein_HC_scaffold0110:27186-32126_20140818
83.6623	-1.37864	9.51e-06	0.000982858	MSTRG.39655.2	618	hypothetical protein TSUD_193820 [Trifolium subterraneum]	Medtr8g467450.1_animal_RPA1_domain_protein_LC_chr8:24241111-24240561_20140818
[truncated: 771 more rows]

## Sheet: Table S5.2. Unique 
Supporting information Table S5.2. Inter-cultivar differences (cv. MNGRN-16 vs. Baker) in transcript expression under Pratylenchus penetrans infection. Genes uniquely expressed in each cultivar.
baseMean	log2 Fold Change	pvalue	padj	ID (this study)	Sequence Length	Sequence Description NCBI	Sequence description & ID, Medicago truncatula
Unique genes expressed in nematode-infected cv. MNGRN-16
304.157	11.1727	3.87e-22	4e-18	MSTRG.2867.2	580	---NA---	---NA---
174.168	10.3767	2.06e-18	1.03e-14	MSTRG.34803.2	412	---NA---	---NA---
88.6267	9.92672	2.02e-15	5.12e-12	132883_t	756	PREDICTED: cucumisin-like [Cicer arietinum]	Medtr5g081100.1_subtilisin-like_serine_endopeptidase_family_protein_LC_chr5:34713145-34710741_20140818
111.43	9.9089	1.02e-06	0.000172757	MSTRG.47162.1	1073	hypothetical protein L195_g034788 [Trifolium pratense]	Medtr1g061230.1_transmembrane_protein,_putative_LC_chr1:26758901-26762510_20140818
154.274	9.80459	1.06e-10	7.59e-08	MSTRG.26702.2	1868	PREDICTED: uncharacterized protein LOC100790056 [Glycine max]	Medtr1g023240.1_hypothetical_protein_LC_chr1:7432015-7429412_20140818
45.5081	9.4281	2.42e-06	0.000339616	87120_t	1740	replication factor-A carboxy-terminal domain protein [Medicago truncatula]/gi	Medtr5g078250.1_replication_factor-A_carboxy-terminal_domain_protein_LC_chr5:33436158-33438920_20140818
169.344	9.34331	1.4e-07	3.51e-05	MSTRG.1877.1	602	hypothetical protein MTR_4g055800 [Medicago truncatula]/gi	Medtr4g055800.1_hypothetical_protein_LC_chr4:20360859-20361911_20140818
99.0792	9.22517	1.36e-10	9.22e-08	105230_t	1500	PREDICTED: uncharacterized protein LOC100790056 [Glycine max]	Medtr1g023240.1_hypothetical_protein_LC_chr1:7432015-7429412_20140818
86.1907	9.01477	8.99e-07	0.000154731	59062_t	1245	plant phospholipase-like protein [Medicago truncatula]/gi	Medtr8g089530.1_plant_phospholipase-like_protein_HC_chr8:37213549-37211375_20140818
81.0035	8.98279	4.91e-09	1.99e-06	177673_t	1500	PREDICTED: uncharacterized protein LOC100790056 [Glycine max]	Medtr1g023240.1_hypothetical_protein_LC_chr1:7432015-7429412_20140818
67.7308	8.98097	5.51e-07	0.00010364	MSTRG.67140.2	817	---NA---	---NA---
71.3157	8.95303	1.37e-05	0.00130424	8251_t	4578	Ty3/gypsy retrotransposon protein partial [Trifolium pratense]	Medtr7g029555.1_hypothetical_protein_LC_chr7:10634063-10633011_20140818
55.5307	8.78678	6.16e-11	4.8e-08	MSTRG.25180.4	369	NYN domain protein [Medicago truncatula]/gi	Medtr3g050240.1_NYN_domain_protein_LC_chr3:19796298-19799980_20140818
332.907	8.75435	5.87e-17	2.16e-13	MSTRG.72718.2	844	---NA---	---NA---
42.3891	8.71503	1.54e-07	3.78e-05	6742_t	705	hypothetical protein MTR_4g055800 [Medicago truncatula]/gi	Medtr4g055800.1_hypothetical_protein_LC_chr4:20360859-20361911_20140818
66.7009	8.70479	7.25e-09	2.8e-06	MSTRG.72296.2	591	hypothetical protein MTR_0200s0020 [Medicago truncatula]/gi	Medtr0200s0020.1_hypothetical_protein_LC_scaffold0200:18198-19518_20140818
53.3718	8.69411	8.04e-18	3.5e-14	MSTRG.82072.1	1430	replication factor-A carboxy-terminal domain protein [Medicago truncatula]/gi	Medtr2g450060.1_replication_factor-A_carboxy-terminal_domain_protein_LC_chr2:22081675-22078797_20140818
148.224	8.65767	6.99e-07	0.000124844	MSTRG.328.3	1384	plant phospholipase-like protein [Medicago truncatula]/gi	Medtr8g089530.1_plant_phospholipase-like_protein_HC_chr8:37213549-37211375_20140818
148.231	8.62141	3.28e-07	6.76e-05	MSTRG.328.2	1688	plant phospholipase-like protein [Medicago truncatula]/gi	Medtr8g089530.1_plant_phospholipase-like_protein_HC_chr8:37213549-37211375_20140818
34.0157	8.57486	2.65e-13	3.92e-10	MSTRG.23788.2	1842	F-box-like protein [Medicago truncatula]/gi	Medtr1g015450.1_F-box-like_protein_HC_chr1:3862292-3870164_20140818
89.6191	8.45688	3.22e-09	1.4e-06	MSTRG.25180.6	626	NYN domain protein [Medicago truncatula]/gi	Medtr3g050240.1_NYN_domain_protein_LC_chr3:19796298-19799980_20140818
41.1934	8.29272	1.78e-15	4.68e-12	MSTRG.13428.1	535	---NA---	---NA---
35.9152	8.26303	1.04e-15	2.82e-12	MSTRG.39534.1	4063	putative copia-type polyprotein partial [Trifolium pratense]	Medtr3g093120.1_SPFH_domain/band_7_family_protein_LC_chr3:42570339-42574091_20140818
91.5482	8.20837	1.93e-05	0.0016956	MSTRG.37821.1	225	---NA---	---NA---
37.3752	8.15698	8.51e-15	1.88e-11	MSTRG.2653.1	541	---NA---	---NA---
37.7517	8.14565	1.9e-14	3.98e-11	MSTRG.24927.1	1422	replication factor-A carboxy-terminal domain protein [Medicago truncatula]/gi	Medtr4g085760.1_replication_factor-A_carboxy-terminal_domain_protein_LC_chr4:33538359-33540924_20140818
22.7905	8.04828	1.84e-05	0.00163311	MSTRG.17929.1	210	---NA---	---NA---
34.1148	7.95157	1.83e-13	2.84e-10	MSTRG.30461.1	505	---NA---	---NA---
23.6331	7.93455	9.04e-15	1.97e-11	MSTRG.11236.2	1235	sterol regulatory element-binding protein site 2 protease [Medicago truncatula]/gi	Medtr4g010130.1_sterol_regulatory_element-binding_protein_site_2_protease_HC_chr4:2236279-2239946_20140818
26.3709	7.92655	3.76e-13	5.35e-10	MSTRG.82071.1	465	plant OB fold protein putative [Medicago truncatula]/gi	Medtr4g070160.1_plant_OB_fold_protein,_putative_LC_chr4:26409757-26410855_20140818
38.0631	7.6465	5.48e-12	5.86e-09	MSTRG.40610.2	1435	ABC transporter family protein [Medicago truncatula]/gi	Medtr6g034265.1_ABC_transporter_family_protein_HC_chr6:11661535-11667511_20140818
30.2736	7.45478	6.69e-10	3.63e-07	52122_t	4866	ABC transporter family protein [Medicago truncatula]/gi	Medtr6g034265.1_ABC_transporter_family_protein_HC_chr6:11661535-11667511_20140818
34.8817	7.26326	3.22e-06	0.000425302	MSTRG.74049.1	2257	---NA---	---NA---
43.9567	6.97002	5.68e-07	0.000105563	19435_t	735	arginase family protein [Medicago truncatula]/gi	Medtr0088s0100.1_arginase_family_protein_HC_scaffold0088:46289-49776_20140818
53.5979	6.92387	3.18e-08	1.02e-05	MSTRG.25180.2	820	NYN domain protein [Medicago truncatula]/gi	Medtr3g050240.1_NYN_domain_protein_LC_chr3:19796298-19799980_20140818
37.7614	6.84059	5.25e-11	4.17e-08	MSTRG.3948.1	2139	disease resistance protein (TIR-NBS-LRR class) [Medicago truncatula]/gi	Medtr4g015030.1_disease_resistance_protein_(TIR-NBS-LRR_class)_HC_chr4:4332186-4338889_20140818
100.285	6.81348	1.16e-06	0.000190859	MSTRG.25180.7	624	NYN domain protein [Medicago truncatula]/gi	Medtr3g050240.1_NYN_domain_protein_LC_chr3:19796298-19799980_20140818
31.0305	6.56068	1.37e-06	0.000218369	104194_t	1095	NYN domain protein [Medicago truncatula]/gi	Medtr3g050240.1_NYN_domain_protein_LC_chr3:19796298-19799980_20140818
93.3666	6.46058	7.53e-05	0.00464056	1396_t	1863	N-6 Adenine-specific DNA methylase [Medicago truncatula]	Medtr4g096760.1_DUF4283_domain_protein_LC_chr4:38501881-38500295_20140818
127.074	6.4148	1.28e-07	3.27e-05	MSTRG.48669.1	5628	Ty3/gypsy retrotransposon protein [Trifolium pratense]	Medtr7g029555.1_hypothetical_protein_LC_chr7:10634063-10633011_20140818
40.018	6.34063	3.52e-11	2.89e-08	MSTRG.40417.3	928	replication factor-A carboxy-terminal domain protein [Medicago truncatula]/gi	Medtr2g450060.1_replication_factor-A_carboxy-terminal_domain_protein_LC_chr2:22081675-22078797_20140818
24.3439	6.30139	0.000114181	0.00631305	MSTRG.20737.2	1494	cyclin-like F-box protein [Medicago truncatula]/gi	Medtr3g082890.1_cyclin-like_F-box_protein_HC_chr3:37415980-37419629_20140818
36.5092	6.16417	8.12e-05	0.00490119	MSTRG.50759.2	1119	transmembrane protein putative [Medicago truncatula]/gi	Medtr6g016315.1_transmembrane_protein,_putative_LC_chr6:5998442-5999043_20140818
26.9285	6.16174	4.13e-12	4.58e-09	98882_t	3657	hypothetical protein TSUD_132210 [Trifolium subterraneum]	Medtr4g016400.1_transmembrane_protein,_putative_LC_chr4:4988484-4988257_20140818
23.5856	6.05194	6.25e-07	0.000114358	MSTRG.3559.1	1109	ubiquitin-protein ligase putative [Medicago truncatula]/gi	Medtr3g463920.1_ubiquitin-protein_ligase,_putative_HC_chr3:25649684-25653834_20140818
22.9774	5.93031	1.18e-08	4.31e-06	MSTRG.3560.1	360	---NA---	---NA---
43.7575	5.77386	2.59e-09	1.17e-06	MSTRG.5125.2	1564	hypothetical protein MtrDRAFT_AC153125g45v2 [Medicago truncatula]	Medtr3g108670.1_transmembrane_protein,_putative_HC_chr3:50193540-50192034_20140818
58.9579	5.48795	2.75e-05	0.00223261	MSTRG.60422.2	839	---NA---	---NA---
36.4327	5.45668	1.43e-11	1.32e-08	MSTRG.85508.14	1200	PPR containing plant protein [Medicago truncatula]/gi	Medtr6g024415.1_PPR_containing_plant_protein_LC_chr6:8744390-8743759_20140818
52.9008	5.29204	9.45e-06	0.000980594	MSTRG.60604.2	839	---NA---	---NA---
39.9593	5.17954	1.14e-10	8.09e-08	MSTRG.84191.1	743	mechanosensitive ion channel protein mitochondrial-like partial [Trifolium pratense]/gi	Medtr8g028760.1_mechanosensitive_ion_channel_protein_MscS_HC_chr8:11086924-11081197_20140818
42.2026	4.97255	9.09e-11	6.67e-08	MSTRG.11236.3	1467	helicase-like protein [Trifolium pratense]	Medtr0048s0090.1_hypothetical_protein_LC_scaffold0048:36104-39426_20140818
25.7751	4.55995	2.53e-08	8.36e-06	MSTRG.24381.2	739	PREDICTED: serine carboxypeptidase-like 42 [Cicer arietinum]	Medtr5g072570.1_serine_carboxypeptidase-like_protein_HC_chr5:30907133-30903173_20140818
26.761	4.46722	8.63e-06	0.000911852	MSTRG.67502.2	207	---NA---	---NA---
38.8777	3.76316	0.000885096	0.0267605	MSTRG.8252.1	2632	disease resistance protein RGA4 [Medicago truncatula]/gi	Medtr5g070960.1_disease_resistance_protein_RGA4_HC_chr5:30062044-30058913_20140818
26.2479	3.74261	8.85e-05	0.00521211	MSTRG.30701.2	399	aldo/keto reductase family oxidoreductase [Medicago truncatula]/gi	Medtr3g083130.1_aldo/keto_reductase_family_oxidoreductase_HC_chr3:37505830-37503715_20140818
65.7068	3.44304	0.00089495	0.0269637	MSTRG.78608.4	1242	uncharacterized protein LOC107613253 isoform X2 [Arachis ipaensis]	Medtr3g010170.1_macronuclear_actin_HC_chr3:2312481-2319318_20140818
26.6833	2.97394	0.001934	0.0454038	163038_t	1020	transmembrane protein putative [Medicago truncatula]/gi	Medtr6g078770.1_transmembrane_protein,_putative_HC_chr6:29607965-29613244_20140818
Unique genes expressed in nematode-infected cv. Baker
36.8479	3.135	0.000144493	0.00748638	3822_t	1236	---NA---	---NA---
65.6866	3.22441	0.00148561	0.0381049	MSTRG.64809.2	1346	hypothetical protein MTR_8g066030 [Medicago truncatula]/gi	Medtr8g066030.1_hypothetical_protein_HC_chr8:27425934-27427223_20140818
55.4954	3.31023	0.000655609	0.0219702	MSTRG.64809.4	1146	hypothetical protein MTR_8g066030 [Medicago truncatula]/gi	Medtr8g066030.1_hypothetical_protein_HC_chr8:27425934-27427223_20140818
55.2347	3.35308	0.00063253	0.0214286	MSTRG.64809.3	1310	hypothetical protein MTR_8g066030 [Medicago truncatula]/gi	Medtr8g066030.1_hypothetical_protein_HC_chr8:27425934-27427223_20140818
50.7526	3.36726	9.28e-07	0.000159032	MSTRG.64809.7	1282	hypothetical protein MTR_8g066030 [Medicago truncatula]/gi	Medtr8g066030.1_hypothetical_protein_HC_chr8:27425934-27427223_20140818
26.2348	3.58478	0.000247095	0.0110454	MSTRG.793.3	923	PREDICTED: uncharacterized protein LOC109337820 isoform X1 [Lupinus angustifolius]	Medtr4g026570.1_hypothetical_protein_LC_chr4:9142766-9142245_20140818
32.5199	4.18357	1.24e-05	0.00120858	MSTRG.51949.1	690	---NA---	---NA---
75.8146	4.55531	3.84e-07	7.73e-05	MSTRG.62643.7	1176	40S ribosomal protein s21-2-like [Trifolium pratense]	Medtr7g076530.1_40S_ribosomal_S21-like_protein_HC_chr7:28815298-28816510_20140818
39.5122	4.58793	5.88e-07	0.000109047	26541_t	1044	biotin carboxyl carrier acetyl-CoA carboxylase [Medicago truncatula]/gi	Medtr7g013100.1_biotin_carboxyl_carrier_acetyl-CoA_carboxylase_HC_chr7:3720376-3725453_20140818
79.0638	4.73113	0.00122137	0.033348	161173_t	1995	sieve element occlusion protein [Medicago truncatula]/gi	Medtr1g075095.1_sieve_element_occlusion_protein_HC_chr1:33177914-33182631_20140818
49.8882	4.79066	0.00178587	0.0431556	MSTRG.16998.1	1080	sieve element occlusion protein [Medicago truncatula]/gi	Medtr1g075095.1_sieve_element_occlusion_protein_HC_chr1:33177914-33182631_20140818
71.3583	4.83871	3.01e-16	9.32e-13	MSTRG.62643.10	1775	Rad51 domain-containing protein partial [Cephalotus follicularis]	Medtr1g102670.1_meiotic_recombination_protein_DMC1,_putative_HC_chr1:46400379-46403108_20140818
15.9118	4.84484	1.25e-05	0.00121201	121718_t	1617	hypothetical protein L195_g046071 partial [Trifolium pratense]	Medtr6g043310.1_hypothetical_protein_HC_chr6:14988154-14988701_20140818
59.6202	4.91767	2.32e-13	3.49e-10	MSTRG.62644.1	821	40S ribosomal protein s21-2-like [Trifolium pratense]	Medtr7g076530.1_40S_ribosomal_S21-like_protein_HC_chr7:28815298-28816510_20140818
56.3863	5.11253	6.97e-06	0.000772626	183436_t	4671	putative CC-NBS-LRR resistance protein partial [Trifolium pratense]	Medtr3g464840.1_LRR_and_NB-ARC_domain_disease_resistance_protein,_putative_LC_chr3:26147553-26137518_20140818
58.3329	5.44893	8.19e-05	0.00493286	42823_t	5439	hypothetical protein TSUD_394910 [Trifolium subterraneum]	Medtr0488s0020.1_DUF4283_domain_protein_LC_scaffold0488:4061-2543_20140818
53.0836	5.45281	3.2e-06	0.000422565	MSTRG.36645.4	846	sulfite exporter TauE/SafE family protein [Medicago truncatula]/gi	Medtr1g061710.1_sulfite_exporter_TauE/SafE_family_protein_LC_chr1:26959803-26956544_20140818
34.4773	5.5805	1.62e-09	7.7e-07	MSTRG.38196.2	786	---NA---	---NA---
52.8467	5.64676	1.35e-06	0.00021559	MSTRG.36645.5	876	sulfite exporter TauE/SafE family protein [Medicago truncatula]/gi	Medtr1g061710.1_sulfite_exporter_TauE/SafE_family_protein_LC_chr1:26959803-26956544_20140818
65.5064	5.65027	3.1e-13	4.53e-10	160872_t	969	unknown [Medicago truncatula]/gi	Medtr8g074330.1_Chitinase_(Class_Ib)_/_Hevein_HC_chr8:31427904-31430944_20140818
40.3626	5.70067	7.74e-06	0.000835015	78319_t	3132	auxilin-like protein partial [Trifolium pratense]	Medtr5g063210.1_transmembrane_protein,_putative_LC_chr5:26212108-26212824_20140818
23.3015	5.73016	3.83e-07	7.73e-05	193761_t	1242	lariat debranching enzyme [Medicago truncatula]/gi	Medtr3g105810.1_lariat_debranching_enzyme_HC_chr3:48808334-48804213_20140818
43.5901	5.81379	8.58e-06	0.000908371	MSTRG.37113.2	3046	auxilin-like protein partial [Trifolium pratense]	Medtr5g063210.1_transmembrane_protein,_putative_LC_chr5:26212108-26212824_20140818
32.021	5.82741	0.000367959	0.0147643	MSTRG.15848.1	644	unknown [Medicago truncatula]/gi	Medtr8g102150.1_myo-inositol_oxygenase_HC_chr8:42953014-42955629_20140818
37.9697	5.84439	8.18e-10	4.34e-07	MSTRG.47449.3	754	---NA---	---NA---
40.8794	6.05249	1.14e-09	5.72e-07	16249_t	924	nuclear movement family protein [Medicago truncatula]/gi	Medtr1g008170.1_nuclear_movement_family_protein_HC_chr1:772406-769625_20140818
46.3349	6.06472	1.01e-13	1.66e-10	MSTRG.56390.5	521	PPR containing protein putative [Medicago truncatula]/gi	Medtr4g133410.7_PPR_containing_protein,_putative_HC_chr4:55806827-55802637_20140818
44.3587	6.09694	4.06e-07	8.08e-05	94817_t	981	hypothetical protein MTR_4g059020 [Medicago truncatula]/gi	Medtr4g059020.1_hypothetical_protein_LC_chr4:21781510-21780682_20140818
21.1211	6.10164	0.000115107	0.0063484	153583_t	1872	MADS-box transcription factor [Medicago truncatula]/gi	Medtr7g075870.2_MADS-box_transcription_factor_HC_chr7:28500972-28481582_20140818
49.3024	6.17407	0.000452192	0.0169295	6721_t	4509	histone deacetylase [Trifolium pratense]	Medtr3g093120.1_SPFH_domain/band_7_family_protein_LC_chr3:42570339-42574091_20140818
48.0133	6.17603	3.98e-14	7.26e-11	130123_t	4440	hypothetical protein TSUD_243380 partial [Trifolium subterraneum]	Medtr7g083690.1_endonuclease/exonuclease/phosphatase_family_protein_LC_chr7:32221247-32217435_20140818
38.9262	6.19651	6.3e-10	3.45e-07	MSTRG.52876.1	1577	lariat debranching enzyme [Medicago truncatula]/gi	Medtr3g105810.1_lariat_debranching_enzyme_HC_chr3:48808334-48804213_20140818
21.8383	6.27218	3.11e-08	1e-05	MSTRG.41215.1	665	---NA---	---NA---
278.449	6.72246	0.00023044	0.0105404	MSTRG.53222.4	1895	hypothetical protein MTR_0035s0070 [Medicago truncatula]/gi	Medtr0035s0070.1_hypothetical_protein_LC_scaffold0035:36362-37104_20140818
50.4494	6.72453	6.84e-08	1.92e-05	MSTRG.18138.1	1516	helicase SKI2W [Trifolium pratense]	Medtr3g462290.1_RNA_helicase,_ATP-dependent,_SK12/DOB1_protein_HC_chr3:24871545-24853513_20140818
71.9605	6.78008	1.36e-11	1.27e-08	107943_t	1395	PPR containing protein putative [Medicago truncatula]/gi	Medtr4g133410.1_PPR_containing_protein,_putative_HC_chr4:55806827-55802637_20140818
43.5565	6.90304	3.23e-05	0.00251396	MSTRG.53460.2	610	cellular nucleic acid-binding protein [Trifolium pratense]	Medtr1g052140.1_DNA/RNA_polymerase_superfamily_protein,_putative_LC_chr1:21026576-21020690_20140818
35.1545	6.91254	1.76e-11	1.57e-08	107039_t	2016	CW-type zinc finger protein [Medicago truncatula]/gi	Medtr5g024810.1_CW-type_zinc_finger_protein_HC_chr5:10011299-9997842_20140818
98.5003	7.01896	2.27e-10	1.45e-07	MSTRG.68993.1	1184	nuclear movement family protein [Medicago truncatula]/gi	Medtr1g008170.1_nuclear_movement_family_protein_HC_chr1:772406-769625_20140818
32.9435	7.18342	6.2e-06	0.000705355	38877_t	606	transmembrane protein putative [Medicago truncatula]/gi	Medtr7g068350.1_transmembrane_protein,_putative_LC_chr7:25002434-25001592_20140818
91.0947	7.36045	0.000283932	0.0122323	MSTRG.24850.2	837	---NA---	---NA---
43.0739	7.37912	3.48e-05	0.00265085	MSTRG.44283.1	716	---NA---	---NA---
46.5719	7.50002	2.98e-06	0.000399494	MSTRG.44285.1	926	---NA---	---NA---
24.534	7.52087	0.00105072	0.0301054	MSTRG.37887.1	1466	microsomal omega-3 fatty acid desaturase [Medicago truncatula]/gi	Medtr5g071170.1_microsomal_omega-3_fatty_acid_desaturase_HC_chr5:30187279-30184947_20140818
48.8295	7.54079	2.99e-08	9.68e-06	MSTRG.62873.3	950	MADS-box transcription factor [Medicago truncatula]/gi	Medtr7g075870.2_MADS-box_transcription_factor_HC_chr7:28500972-28481582_20140818
27.4996	7.56836	3.81e-09	1.62e-06	MSTRG.35549.1	279	---NA---	---NA---
55.625	7.57	1.88e-05	0.00166438	94158_t	306	small ubiquitin-like modifier 3 [Medicago truncatula]/gi	Medtr3g053540.1_small_ubiquitin-like_modifier_3_HC_chr3:21293436-21291225_20140818
64.6137	7.7535	1.61e-17	6.55e-14	52807_t	1545	PREDICTED: uncharacterized protein LOC109339410 isoform X2 [Lupinus angustifolius]/gi	Medtr4g026570.1_hypothetical_protein_LC_chr4:9142766-9142245_20140818
92.8793	7.79483	0.000115375	0.00635916	MSTRG.24850.1	758	---NA---	---NA---
39.3089	7.81678	6.26e-05	0.00405713	MSTRG.14052.2	212	---NA---	---NA---
53.9148	7.86642	4.01e-07	8.01e-05	MSTRG.29197.1	749	---NA---	---NA---
50.1025	7.87513	3.78e-12	4.3e-09	MSTRG.84427.2	1241	hypothetical protein MTR_6g078940 [Medicago truncatula]/gi	Medtr6g078940.1_hypothetical_protein_HC_chr6:29702981-29702181_20140818
56.0361	7.95017	2.57e-07	5.64e-05	MSTRG.29197.2	749	---NA---	---NA---
17.1832	8.03191	0.000909932	0.0272735	67718_t	768	hypothetical protein MTR_0200s0020 [Medicago truncatula]/gi	Medtr0200s0020.1_hypothetical_protein_LC_scaffold0200:18198-19518_20140818
75.9615	8.08223	1.17e-07	3.03e-05	MSTRG.57700.1	1103	hypothetical protein MTR_1g115940 [Medicago truncatula]/gi	Medtr1g115940.1_hypothetical_protein_HC_chr1:52388483-52387233_20140818
31.4129	8.18775	1.31e-10	9.01e-08	94549_t	5709	Ty3/gypsy retrotransposon protein [Trifolium pratense]	Medtr8g094810.1_leguminosin_group486_secreted_peptide_HC_chr8:39604959-39608257_20140818
25.4598	8.23226	4.7e-05	0.00329226	MSTRG.84309.1	424	myb transcription factor [Medicago truncatula]/gi	Medtr8g092810.1_myb_transcription_factor_LC_chr8:38813164-38819601_20140818
32.4042	8.23913	1.32e-05	0.00126954	MSTRG.71214.1	2789	ribonuclease H [Trifolium pratense]	Medtr8g015630.1_hypothetical_protein_LC_chr8:5150097-5151869_20140818
49.6278	8.24102	0.000149779	0.00767583	MSTRG.31129.1	566	unknown [Medicago truncatula]/gi	Medtr8g099245.1_arabinogalactan_peptide-like_protein_HC_chr8:41765566-41763694_20140818
99.8811	8.25513	7.08e-13	9.62e-10	MSTRG.62558.2	1057	hypothetical protein MTR_4g059020 [Medicago truncatula]/gi	Medtr4g059020.1_hypothetical_protein_LC_chr4:21781510-21780682_20140818
30.5442	8.32203	8.96e-12	8.67e-09	MSTRG.18138.6	1249	helicase SKI2W [Trifolium pratense]	Medtr3g462290.1_RNA_helicase,_ATP-dependent,_SK12/DOB1_protein_HC_chr3:24871545-24853513_20140818
32.6816	8.33159	7.03e-07	0.000125447	MSTRG.25681.1	2710	replication factor C putative [Medicago truncatula]/gi	Medtr5g020810.1_replication_factor_C,_putative_HC_chr5:7969752-7973533_20140818
36.5204	8.37274	5.66e-07	0.000105501	MSTRG.11862.1	911	hypothetical protein TSUD_125000 [Trifolium subterraneum]	---NA---
23.0554	8.37692	0.00167415	0.0413021	MSTRG.32402.4	462	---NA---	Medtr2g083950.1_transmembrane_protein,_putative_LC_chr2:35242657-35243825_20140818
123.525	8.38001	4.03e-26	7.81e-22	MSTRG.30739.7	608	importin subunit alpha-1a-like [Cajanus cajan]	Medtr2g034900.1_importin_subunit_alpha-1b_HC_chr2:13400262-13404524_20140818
31.7637	8.39204	9.14e-08	2.47e-05	MSTRG.76316.2	297	hypothetical protein MTR_3g070320 [Medicago truncatula]/gi	Medtr3g070320.1_hypothetical_protein_LC_chr3:31524740-31525346_20140818
49.2141	8.40203	0.00121262	0.033203	MSTRG.33794.1	990	---NA---	---NA---
26.4631	8.43868	3.18e-07	6.61e-05	MSTRG.26123.3	993	MADS-box transcription factor [Medicago truncatula]/gi	Medtr7g075870.2_MADS-box_transcription_factor_HC_chr7:28500972-28481582_20140818
23.6535	8.45824	3.83e-12	4.33e-09	MSTRG.4667.1	263	---NA---	---NA---
47.5046	8.51518	3.57e-05	0.00269978	MSTRG.18017.2	1189	transmembrane protein putative [Medicago truncatula]/gi	Medtr5g033180.1_transmembrane_protein,_putative_LC_chr5:14303343-14302376_20140818
23.7193	8.54527	3.91e-05	0.00288543	MSTRG.20390.2	1248	cyclin-like F-box protein [Medicago truncatula]/gi	Medtr3g082890.1_cyclin-like_F-box_protein_HC_chr3:37415980-37419629_20140818
33.8332	8.55	0.000325729	0.0135107	MSTRG.75676.1	994	---NA---	---NA---
39.6626	8.57151	6.95e-14	1.2e-10	MSTRG.47056.4	2042	hypothetical protein L195_g037224 partial [Trifolium pratense]	---NA---
21.1839	8.58654	0.000315629	0.0131978	MSTRG.48304.1	316	---NA---	---NA---
32.588	8.62053	0.000549002	0.0193345	MSTRG.55012.2	329	---NA---	---NA---
60.6356	8.64151	6.35e-12	6.55e-09	MSTRG.84427.1	1635	hypothetical protein MTR_6g078940 [Medicago truncatula]/gi	Medtr6g078940.1_hypothetical_protein_HC_chr6:29702981-29702181_20140818
40.792	8.77302	0.000468775	0.0173367	MSTRG.43759.1	1625	transmembrane protein putative [Medicago truncatula]/gi	Medtr2g026240.1_transmembrane_protein,_putative_LC_chr2:9562121-9560946_20140818
82.5657	8.90145	1.24e-09	6.14e-07	MSTRG.6430.1	543	---NA---	---NA---
38.7448	8.9044	0.000698359	0.0229513	100650_t	693	PREDICTED: albumin-2-like [Cicer arietinum]	Medtr6g040290.1_albumin-2_protein_LC_chr6:14452313-14453014_20140818
42.3628	8.94077	1.28e-10	8.87e-08	MSTRG.18138.5	1658	RNA helicase ATP-dependent SK12/DOB1 protein [Medicago truncatula]/gi	Medtr3g462290.1_RNA_helicase,_ATP-dependent,_SK12/DOB1_protein_HC_chr3:24871545-24853513_20140818
53.7149	9.01497	7.08e-09	2.75e-06	MSTRG.6359.6	582	---NA---	---NA---
119.848	9.0177	2.23e-12	2.67e-09	MSTRG.77395.2	2060	disease resistance protein (TIR-NBS-LRR class) [Trifolium pratense]	Medtr5g092190.1_disease_resistance_protein_(TIR-NBS-LRR_class)_LC_chr5:40265309-40256638_20140818
48.2639	9.10563	1.28e-10	8.87e-08	MSTRG.18138.8	1629	RNA helicase ATP-dependent SK12/DOB1 protein [Medicago truncatula]/gi	Medtr3g462290.1_RNA_helicase,_ATP-dependent,_SK12/DOB1_protein_HC_chr3:24871545-24853513_20140818
148.918	9.14213	3.44e-06	0.000446601	MSTRG.88644.2	1785	aspartic protease family protein putative [Medicago truncatula]/gi	Medtr5g080330.1_aspartic_protease_family_protein,_putative_LC_chr5:34380900-34377963_20140818
50.4823	9.15296	7.65e-06	0.000826756	MSTRG.33211.1	571	---NA---	---NA---
55.9237	9.16286	9.47e-16	2.62e-12	70868_t	3936	hypothetical protein L195_g037224 partial [Trifolium pratense]	---NA---
56.7721	9.16892	2.72e-19	1.69e-15	31393_t	3042	disease resistance protein (TIR-NBS-LRR class) [Trifolium pratense]	Medtr5g092190.1_disease_resistance_protein_(TIR-NBS-LRR_class)_LC_chr5:40265309-40256638_20140818
57.5588	9.21971	5.57e-08	1.65e-05	MSTRG.12808.1	3408	replication factor C putative [Medicago truncatula]/gi	Medtr5g020810.1_replication_factor_C,_putative_HC_chr5:7969752-7973533_20140818
158.634	9.23963	2.87e-06	0.000389064	MSTRG.88644.1	1853	aspartic protease family protein putative [Medicago truncatula]/gi	Medtr5g080330.1_aspartic_protease_family_protein,_putative_LC_chr5:34380900-34377963_20140818
63.2413	9.32484	9.33e-14	1.55e-10	MSTRG.47056.5	3174	hypothetical protein L195_g037224 partial [Trifolium pratense]	---NA---
63.6521	9.45373	1.1e-07	2.89e-05	MSTRG.8219.2	421	hypothetical protein MTR_4g059020 [Medicago truncatula]/gi	Medtr4g059020.1_hypothetical_protein_LC_chr4:21781510-21780682_20140818
207.53	9.4738	8.53e-05	0.0050798	MSTRG.53222.2	1829	hypothetical protein MTR_0035s0070 [Medicago truncatula]/gi	Medtr0035s0070.1_hypothetical_protein_LC_scaffold0035:36362-37104_20140818
62.8419	9.49203	0.000368607	0.0147788	MSTRG.29802.3	726	hypothetical protein MTR_0961s0010 [Medicago truncatula]/gi	Medtr0961s0010.1_hypothetical_protein_HC_scaffold0961:1410-2203_20140818
51.697	9.59536	3.75e-05	0.00279433	MSTRG.32402.1	1933	cyclin-like F-box protein [Medicago truncatula]/gi	Medtr3g082890.1_cyclin-like_F-box_protein_HC_chr3:37415980-37419629_20140818
78.0731	9.62993	2.88e-14	5.32e-11	MSTRG.47056.2	4696	hypothetical protein L195_g037224 partial [Trifolium pratense]	Medtr6g004070.1_sphingoid_long-chain_bases_kinase-like_protein_HC_chr6:102237-110525_20140818
203.496	9.73683	1.8e-07	4.29e-05	MSTRG.8626.3	1243	hypothetical protein L195_g034788 [Trifolium pratense]	Medtr1g061230.1_transmembrane_protein,_putative_LC_chr1:26758901-26762510_20140818
214.173	9.79455	1.18e-07	3.05e-05	MSTRG.8626.2	1195	hypothetical protein L195_g034788 [Trifolium pratense]	Medtr1g061230.1_transmembrane_protein,_putative_LC_chr1:26758901-26762510_20140818
218.791	9.81492	1.14e-07	2.98e-05	MSTRG.8626.1	1284	hypothetical protein L195_g034788 [Trifolium pratense]	Medtr1g061230.1_transmembrane_protein,_putative_LC_chr1:26758901-26762510_20140818
94.6619	9.85882	8.51e-15	1.88e-11	MSTRG.47056.1	3947	hypothetical protein L195_g037224 partial [Trifolium pratense]	Medtr6g004070.1_sphingoid_long-chain_bases_kinase-like_protein_HC_chr6:102237-110525_20140818
228.784	9.87838	2.67e-08	8.8e-06	147637_t	702	---NA---	---NA---
102.052	9.99173	4.39e-07	8.58e-05	MSTRG.6714.1	365	---NA---	---NA---
85.657	10.0252	1.83e-15	4.72e-12	9072_t	5538	hypothetical protein L195_g009111 [Trifolium pratense]	Medtr3g451840.1_Pol-like_polyprotein/retrotransposon,_putative_LC_chr3:18857640-18856786_20140818
97.4467	10.2085	5.39e-14	9.59e-11	120037_t	5574	hypothetical protein L195_g009111 [Trifolium pratense]	Medtr3g451840.1_Pol-like_polyprotein/retrotransposon,_putative_LC_chr3:18857640-18856786_20140818
371.133	10.4112	5.87e-12	6.15e-09	MSTRG.30576.2	747	---NA---	---NA---
88.5507	10.4335	2.05e-05	0.00177001	MSTRG.32402.3	1028	---NA---	Medtr2g083950.1_transmembrane_protein,_putative_LC_chr2:35242657-35243825_20140818
118.447	10.4866	2.43e-14	4.7e-11	42431_t	5637	hypothetical protein L195_g009111 [Trifolium pratense]	Medtr3g012210.1_hypothetical_protein_LC_chr3:3288810-3287019_20140818
169.25	10.8196	3.68e-09	1.57e-06	MSTRG.55867.1	1838	transmembrane protein putative [Medicago truncatula]/gi	Medtr5g033180.1_transmembrane_protein,_putative_LC_chr5:14303343-14302376_20140818
142.365	10.8214	7.85e-17	2.83e-13	MSTRG.85969.1	1877	hypothetical protein L195_g001325 [Trifolium pratense]	Medtr0002s0930.1_hypothetical_protein_LC_scaffold0002:354058-353150_20140818
236.038	10.8587	9.4e-17	3.31e-13	MSTRG.44284.2	5052	hypothetical protein L195_g009111 [Trifolium pratense]	Medtr3g451840.1_Pol-like_polyprotein/retrotransposon,_putative_LC_chr3:18857640-18856786_20140818
244.138	10.9299	3.55e-17	1.38e-13	90444_t	5601	hypothetical protein L195_g009111 [Trifolium pratense]	Medtr3g451840.1_Pol-like_polyprotein/retrotransposon,_putative_LC_chr3:18857640-18856786_20140818
267.659	11.0683	2.44e-19	1.57e-15	174175_t	5637	hypothetical protein L195_g009111 [Trifolium pratense]	Medtr3g012210.1_hypothetical_protein_LC_chr3:3288810-3287019_20140818
269.835	11.0731	2.11e-19	1.42e-15	MSTRG.24335.1	5664	hypothetical protein L195_g009111 [Trifolium pratense]	Medtr3g012210.1_hypothetical_protein_LC_chr3:3288810-3287019_20140818
260.824	11.1072	1.94e-19	1.36e-15	903_t	5442	hypothetical protein L195_g009111 [Trifolium pratense]	Medtr3g451840.1_Pol-like_polyprotein/retrotransposon,_putative_LC_chr3:18857640-18856786_20140818
641.001	12.0023	6.69e-11	5.13e-08	MSTRG.13078.2	1746	transmembrane protein putative [Medicago truncatula]/gi	Medtr5g033180.1_transmembrane_protein,_putative_LC_chr5:14303343-14302376_20140818
[truncated: 2 more rows]

## Sheet: Table S5.3. R genes
Supporting information Table S5.3. Differentially expressed putative R genes in both Pratylenchus penetrans infected cv. MNGRN-16 and cv. Baker, respectively.
[truncated: 194 more rows]

[truncated: 2 more sheets: Table S5.4. GO enrichment, Table S5.5. TFs]
